# Supplementary material for: Transcriptome analysis of Azospirillum brasilense vegetative and cyst states reveals large-scale alterations in metabolic and replicative gene expression
Source: PubMed Central journal article supplement (PMC6159551; doi:10.1099/mgen.0.000200), 2018-07-30
Supplement: mgen-5-200-s001.pdf [file mgen-5-200-s001.pdf]

**Supplemental Table S1. PCR primers used for RT-qPCR validation of RNASeq.**

| <b>Gene</b>                   | <b>Forward Primer 5' – 3'</b> | <b>Reverse Primer 5' – 3'</b> |
|-------------------------------|-------------------------------|-------------------------------|
| <i>CstA</i> (AMK58_ 22895)    | CGC TCA CCG ACT TCA TCC AT    | GTG ATC GAG ATG AAC GGC CA    |
| <i>OxyR</i> (AMK58_ 19140)    | GGC GG CCT CGT CAG G          | GGG CCA TGT CCA CCA GTT C     |
| <i>ExbD</i> (AMK58_22845)     | CAT CCA GGC GGA CAA GAC       | GCG TTC ATC ACC TCG GTC       |
| <i>ExoP</i> (AMK58_ 20520)    | GGA TCA ACG ACA CCA TCG       | GCC TTG AAA GAG ACG AGG       |
| <i>PhaZ</i> (AMK58_13180)     | TGC TTC TGG AAC ACC GTC TC    | TCT CCG GCT TCA TGT CGA TG    |
| <i>RpoH</i> (AMK58_ 18070)    | GGA CCT TCT GGC CGA TGA G     | CGA GAC GTG GAA GTG CTG G     |
| <i>TonB</i> (AMK58_ 22840)    | CGG TAG TCG CCG TTG ATC TC    | GTC ATC GCT CTA CGG CTC C     |
| <i>Hsp15</i> (AMK58_ 11850)   | CC TAC GAG GAT CTT GCC CC     | TCC TCT CCG TAG AGC TGG TC    |
| <i>Bfr1</i> (AMK58_ 88550)    | GAT CGT TGC CGA GCA TTT CC    | CCT GGA AGG TCT TCC CAA       |
| <i>Amidase</i> (AMK58_ 31750) | CTG CGT GAG ATC GTC ATG GG    | GAT CTG GTT GAC GAG TGG GG    |
| <i>Dps</i> (AMK58_ 33250)     | CAT GAC CCA GTA CAC GGA GC    | CTT GGT GAA CTG CGA GAA GC    |
| <i>recA*</i> (AMK58_ 10020)   | ACGC TAG AGA TCG CCG ATA CG   | CCC ATC TCG CCT TCC AGT TC    |
| <i>16S*</i> (Lin et al 2012)  | ATT GAG TTG GGC ACT CTG GT    | TCC GCG ATT ACT AGC GAT TC    |
| <i>gryA*</i> (AMK58_ 16980)   | ACG GCA GCG ATC CAA AGC       | GAT CGT ATC ACC GGG CGT GT    |

\* denotes housekeeping genes used for normalization.

**Supplemental Table S2. Homologous DEG's in both *R. centenum* and *A. brasilense*.**

| Gene ID                  |                    | COG                             | log2fold change (cyst / vegetative) |            |                      |            |        |
|--------------------------|--------------------|---------------------------------|-------------------------------------|------------|----------------------|------------|--------|
| <i>A. brasilense</i> sp7 | <i>R. centenum</i> |                                 | <i>R. centenum</i>                  |            | <i>A. brasilense</i> |            |        |
|                          |                    |                                 | 24 hrs                              | 48 hrs     | 72 hrs               | 96 hrs     |        |
| AMK58_12430              | 2284               | Cell<br>Cycle/Shape/Homeostasis | -                                   | 1.534      | 1.944                | 2.634      | 3.135  |
| AMK58_13120              | 2700               | Cell Wall                       | -                                   | -          | -                    | -<br>2.563 | 3.849  |
| AMK58_17940              | dnaJ               | Chaperone                       | -                                   | -          | -<br>2.029           | -<br>1.824 | 3.742  |
| AMK58_04635              | 327                | Chemotaxis                      | -                                   | -          | -<br>1.522           | -          | 3.423  |
| AMK58_05485              | 2156               | Defense                         | -                                   | -          | -                    | 1.944      | -3.446 |
| AMK58_16895              | 3229               | Defense                         | -                                   | -          | -                    | 1.890      | -4.750 |
| AMK58_19425              | 1946               | dehydrogenase                   | 1.585                               | 1.991      | 2.391                | 3.410      | -5.369 |
| AMK58_14155              | 2649               | dehydrogenase                   | -                                   | -          | -                    | 1.842      | -3.597 |
| AMK58_04120              | 2649               | Dehydrogenase                   | -                                   | -          | -                    | 1.842      | 4.135  |
| AMK58_06095              | 2649               | DNA Repair and<br>Replication   | -                                   | -          | -                    | 1.842      | -5.740 |
| AMK58_21855              | 2393               | DNA Repair and<br>Replication   | -                                   | -          | -                    | -<br>2.306 | -5.074 |
| AMK58_08205              | 2178               | Energy                          | -<br>1.735                          | -<br>1.570 | -<br>1.624           | -<br>3.443 | 3.038  |
| AMK58_19150              | 3864               | Energy                          | -                                   | -<br>1.548 | -<br>1.540           | -<br>1.562 | -5.596 |
| AMK58_17980              | 1936               | Energy                          | -                                   | 2.118      | 2.237                | -          | 4.109  |
| AMK58_17220              | 497                | Hypothetical                    | 1.973                               | 2.115      | 2.612                | 5.529      | -4.941 |
| AMK58_08345              | 965                | Hypothetical                    | 2.524                               | 2.619      | 2.843                | 4.634      | -3.877 |
| AMK58_11590              | 1988               | Hypothetical                    | -                                   | -          | -                    | -<br>1.637 | 3.097  |
| AMK58_12240              | 2202               | Hypothetical                    | -                                   | -          | -                    | -<br>1.633 | -4.112 |
| AMK58_03345              | 2828               | Hypothetical                    | -                                   | -          | -                    | -<br>2.048 | 4.346  |
| AMK58_04205              | 1598               | Hypothetical                    | -                                   | -          | 1.626                | 2.455      | 3.199  |
| AMK58_03340              | 2019               | Hypothetical                    | -                                   | -          | -                    | 1.698      | 3.006  |

|             |           |                                        |   |       |       |       |        |
|-------------|-----------|----------------------------------------|---|-------|-------|-------|--------|
| AMK58_13280 | 2719      | Hypothetical                           | - | -     | -     | 1.597 | -4.189 |
| AMK58_07275 | 0845/2585 | Hypothetical                           | - | -     | -     | 2.332 | -6.124 |
| AMK58_10930 | 4087      | Membrane                               | - | -     | 1.506 | 1.803 | 4.357  |
| AMK58_01955 | 796       | Membrane                               | - | -     | -     | 2.517 | 3.089  |
| AMK58_04130 | 119       | Metabolism:<br>Carbohydrate            | - | -     | -     | -     | 4.844  |
| AMK58_19430 | 1947      | Metabolism: Carbon                     | - | 1.904 | 2.316 | 3.023 | -3.260 |
| AMK58_02065 | 336       | Metabolism: Carbon                     | - | -     | 1.883 | 2.054 | -5.788 |
| AMK58_02575 | 4080/3026 | Metabolism: Carbon                     | - | -     | -     | -     | -5.622 |
| AMK58_26800 | 3949      | Metabolism: Carbon                     | - | 1.684 | 2.816 | 4.463 | -5.622 |
| AMK58_27345 | 1906      | Metabolism: Carbon                     | - | 1.821 | 2.286 | 2.934 | -5.935 |
| AMK58_21280 | 2991      | Metabolism: Carbon                     | - | -     | -     | -     | -3.163 |
| AMK58_06940 | 3970      | Metabolism: Co-Factors<br>and Vitamins | - | -     | -     | -     | 4.090  |
| AMK58_17665 | 1370      | Metabolism: Co-Factors<br>and Vitamins | - | 2.119 | 2.658 | 1.661 | 4.090  |
| AMK58_13190 | 796       | Metabolism: Lipid                      | - | 1.924 | 2.157 | 3.978 | 3.136  |
| AMK58_05965 | 903       | Metabolism: Lipid                      | - | -     | -     | -     | -5.129 |
| AMK58_25280 | 0184/0186 | Methyltransferase                      | - | -     | -     | 1.882 | -5.356 |
| AMK58_14130 | 330       | Motility                               | - | -     | -     | 1.532 | 3.164  |
| AMK58_10430 | 700       | peptidase                              | - | -     | 1.644 | -     | 3.261  |
| AMK58_07380 | 1573      | Ribosome                               | - | -     | 2.506 | 2.845 | 4.541  |
| AMK58_10405 | 707       | Ribosome                               | - | 1.614 | 1.667 | -     | -6.959 |
| AMK58_10410 | 706       | Ribosome                               | - | 1.518 | -     | -     | 4.101  |
| AMK58_13080 | 3432      | Ribosome                               | - | 1.692 | -     | -     | -3.464 |
| AMK58_01025 | 3261      | Ribosome                               | - | 2.111 | -     | -     | -4.970 |
| AMK58_14140 | 574       | signal transduction                    | - | 1.645 | -     | -     | -6.258 |
| AMK58_03325 | 1876      | Signal Transduction                    | - | -     | -     | -     | 6.417  |
| AMK58_14140 | 574       | Starvation                             | - | -     | -     | -     | 3.295  |
| AMK58_03325 | 1876      | Starvation                             | - | -     | -     | -     | -5.181 |
|             |           |                                        | - | 1.541 | 1.950 | 2.833 | -3.644 |

|             |      |                                |       |       |       |       |                   |        |
|-------------|------|--------------------------------|-------|-------|-------|-------|-------------------|--------|
| AMK58_20425 | 1648 | Transcription                  | -     | -     | -     | -     | 1.611             | -3.214 |
| AMK58_01155 | 2558 | Transcription                  | -     | -     | -     | -     | 1.659             | -3.441 |
| AMK58_03365 | 2015 | Transcription                  | -     | -     | -     | -     | 2.502 3.305       | -4.633 |
| AMK58_20510 | 2123 | Translation                    | -     | -     | -     | -     | 1.589             | -3.262 |
| AMK58_10395 | 693  | translation                    | -     | 1.673 | -     | -     | -                 | -6.407 |
| AMK58_10465 | 693  | translation                    | -     | 1.673 | -     | -     | -                 | -5.373 |
| AMK58_25005 | 24   | Transport                      | 2.255 | 3.533 | 2.236 | 2.357 | -                 | 4.863  |
| AMK58_20460 | 3351 | Transport                      | -     | -     | -     | -     | 1.862             | 5.313  |
| AMK58_20470 | 3352 | Transport: Amino Acid          | -     | -     | -     | -     | 1.862             | 3.072  |
| AMK58_09260 | 1802 | Transport: Biopolymer          | -     | -     | -     | -     | 1.771 2.657 3.795 | -6.468 |
| AMK58_27900 | 313  | Transport: Metal               | 1.730 | 1.664 | 3.370 | 4.124 | -                 | 4.897  |
| AMK58_14060 | 3732 | Transport: Sugar               | 2.122 | 1.965 | 1.944 | 3.372 | -                 | 3.332  |
| AMK58_10470 | 692  | tRNA<br>synthesis/modification | 1.803 | 2.702 | 2.071 | -     | -                 | -3.892 |
| AMK58_16325 | 406  | tRNA<br>synthesis/modification | -     | 2.455 | -     | -     | -                 | 3.086  |
| AMK58_10475 | 691  | tRNA<br>synthesis/modification | -     | 2.189 | -     | -     | -                 | -5.623 |
| AMK58_14400 | 1241 | tRNA<br>synthesis/modification | -     | 2.810 | -     | -     | -                 | 3.465  |
| AMK58_06050 | 1256 | tRNA<br>synthesis/modification | -     | 2.739 | -     | -     | -                 | -4.504 |
| AMK58_06055 | 1256 | tRNA<br>synthesis/modification | -     | 2.739 | -     | -     | -                 | -3.660 |
| AMK58_02175 | 2497 | tRNA<br>synthesis/modification | -     | 1.812 | -     | -     | -                 | -5.059 |
| AMK58_12220 | 2209 | tRNA<br>synthesis/modification | -     | 2.059 | -     | -     | -                 | 3.945  |

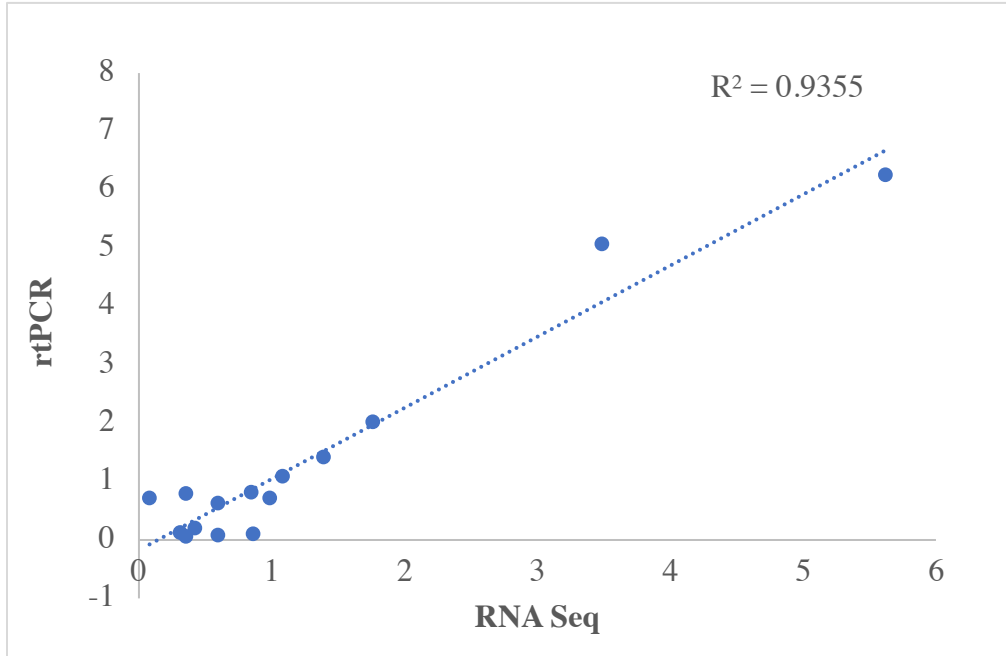

**Figure S1. Validation of RNA-seq with rt-PCR.** 12 genes were chosen to validate the RNA-seq data. Quantitative reverse transcription PCR (RT-qPCR) on sub-samples of the sequenced RNA was done with the primers in Supplemental Table S1. Log-fold changes of cyst over vegetative RNA obtained from RT-qPCR and RNA-seq analysis were plotted against each for correlation analysis.

## Transcription

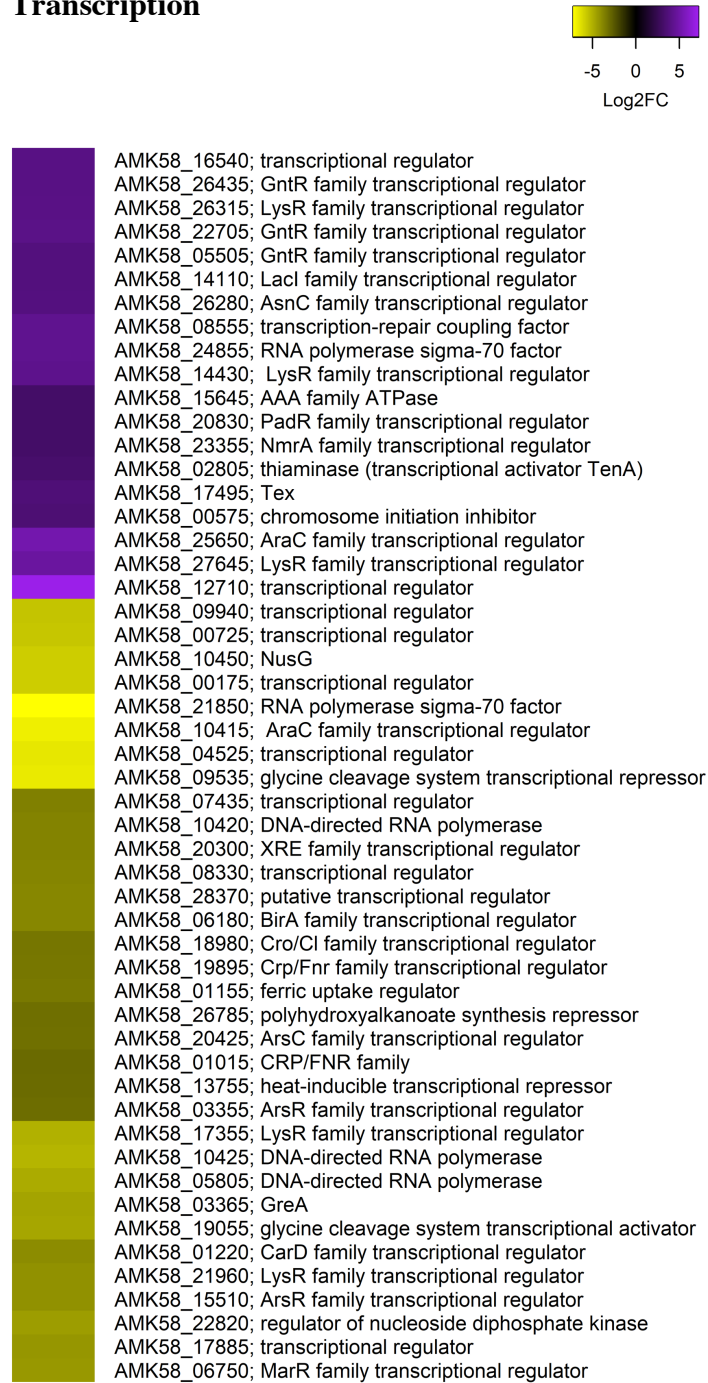

**Figure S2. Differentially regulated transcription factors. Heat maps display the DEGs belonging the Transcription COG. Purple indicates genes that are up-regulated and yellow indicates genes that are down-regulated in cyst cells relative to vegetative expression levels.**

### Signal Transduction

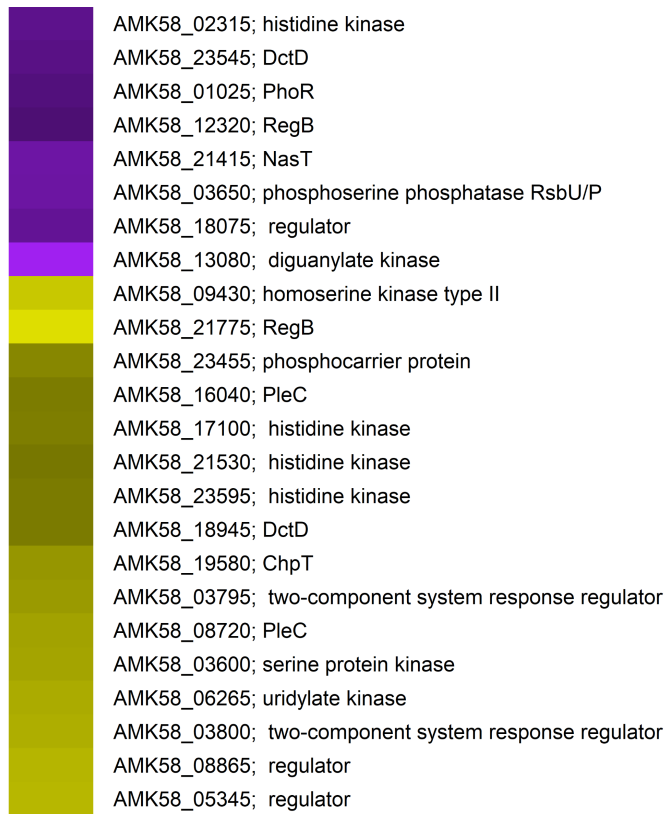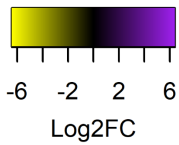

### Cyclic Nucleotide

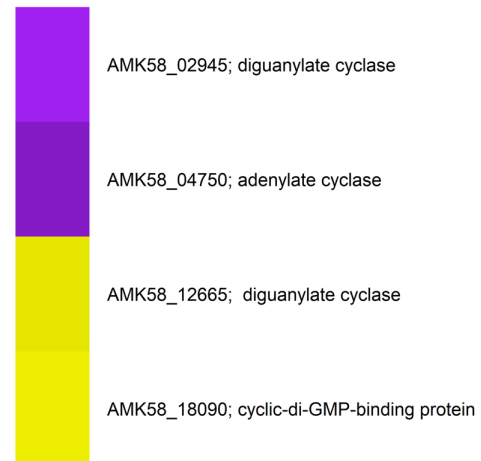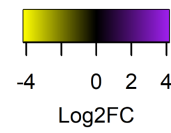

**Figure S3. Differentially regulated signal transduction and cyclic nucleotide activity in cysts. Heat maps display the DEGs belonging to the signal transduction COG. Purple indicates up-regulated genes and yellow indicates down-regulated genes in cyst cells relative to vegetative expression levels..**

## Oxidative Phosphorylation

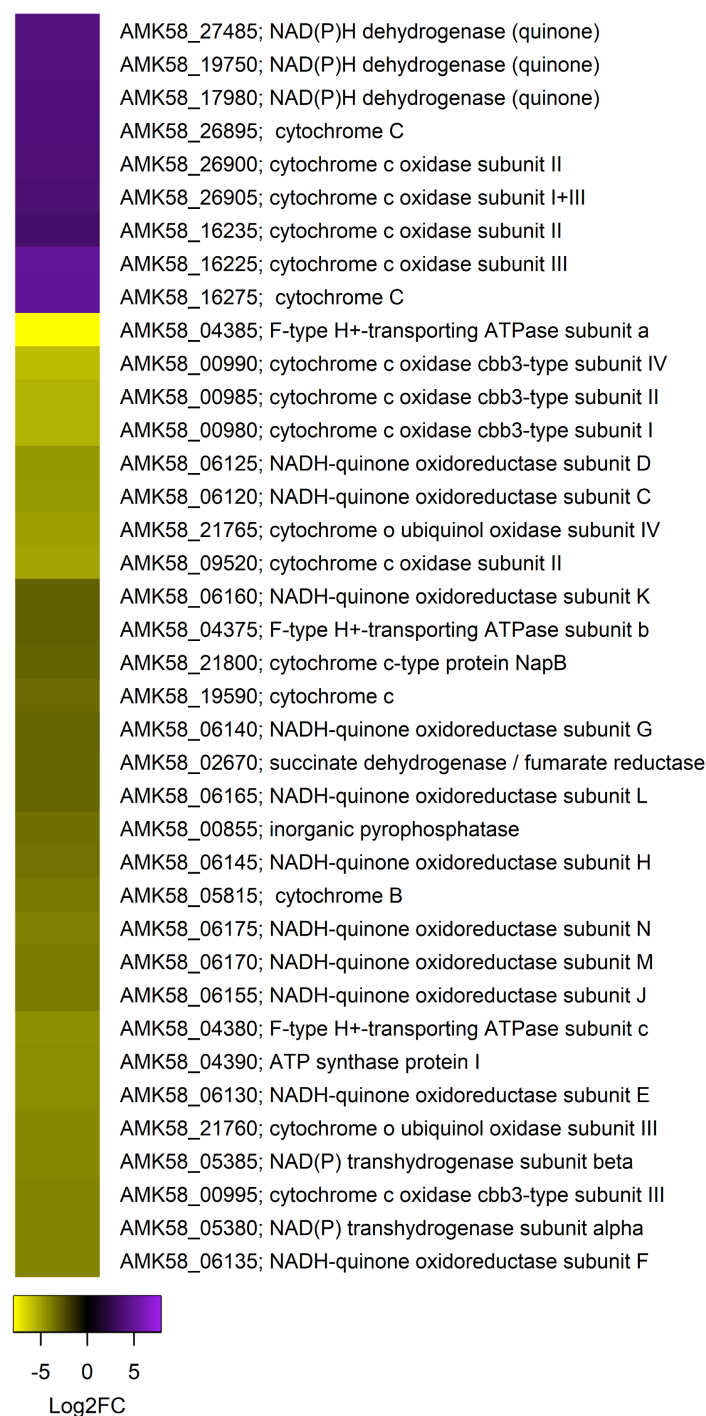

## Sulfur Process

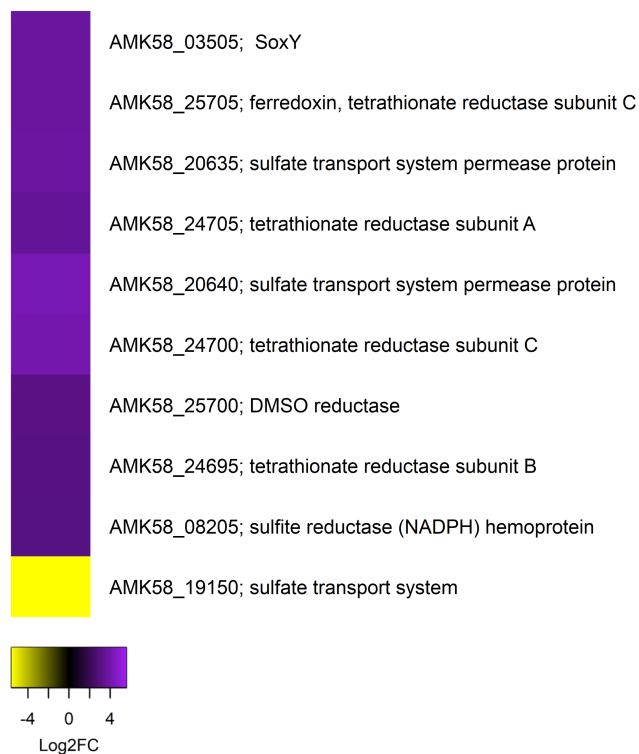

## Nitrate/Nitrite Reduction

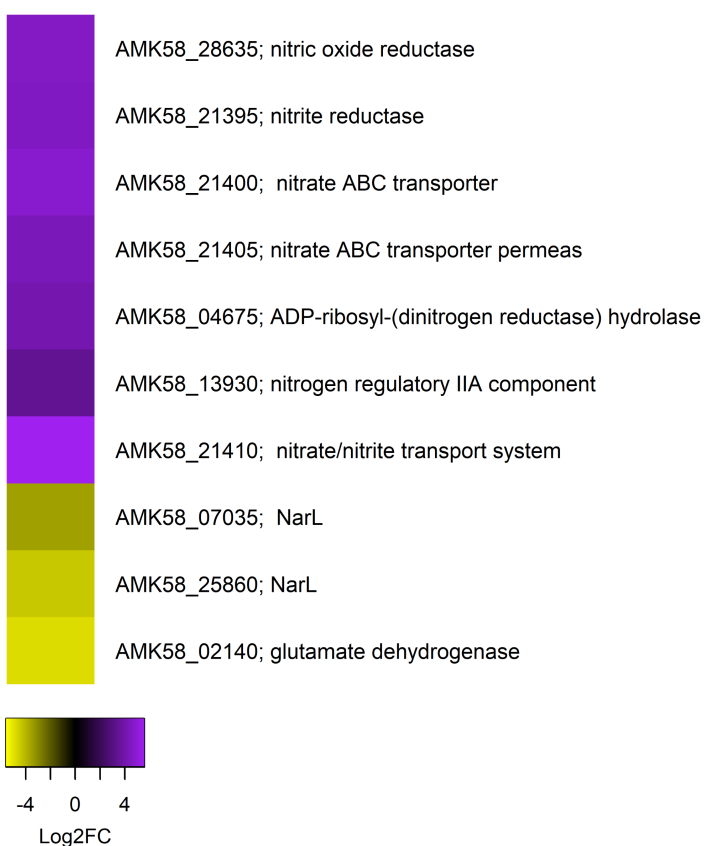

**Figure S4. Differentially expressed energy genes in cyst vs vegetative cell show down-regulation of oxidative phosphorylation and up-regulation of alternate electron acceptors. Heat maps display significantly differentially expressed genes from the Energy COG. Purple indicates gene expression up-regulation in cysts compared to vegetative cells and yellow indicates down-regulated gene expression.**



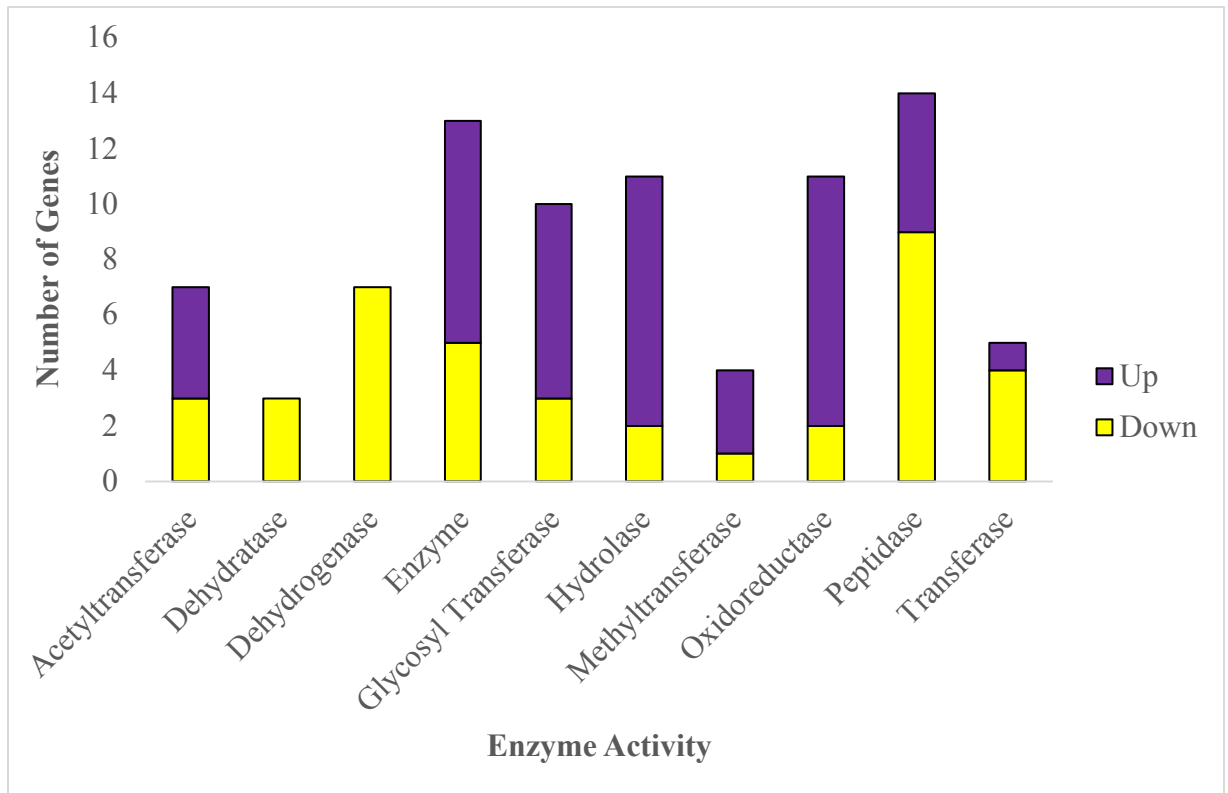

**Figure S5. Global enzymatic patterns of cysts. DEGs belonging to the Enzyme COG were broken down in categories based on general enzymatic function. Purple indicates the number up-regulated DEGs and yellow indicates down-regulated DEGs.**

A.

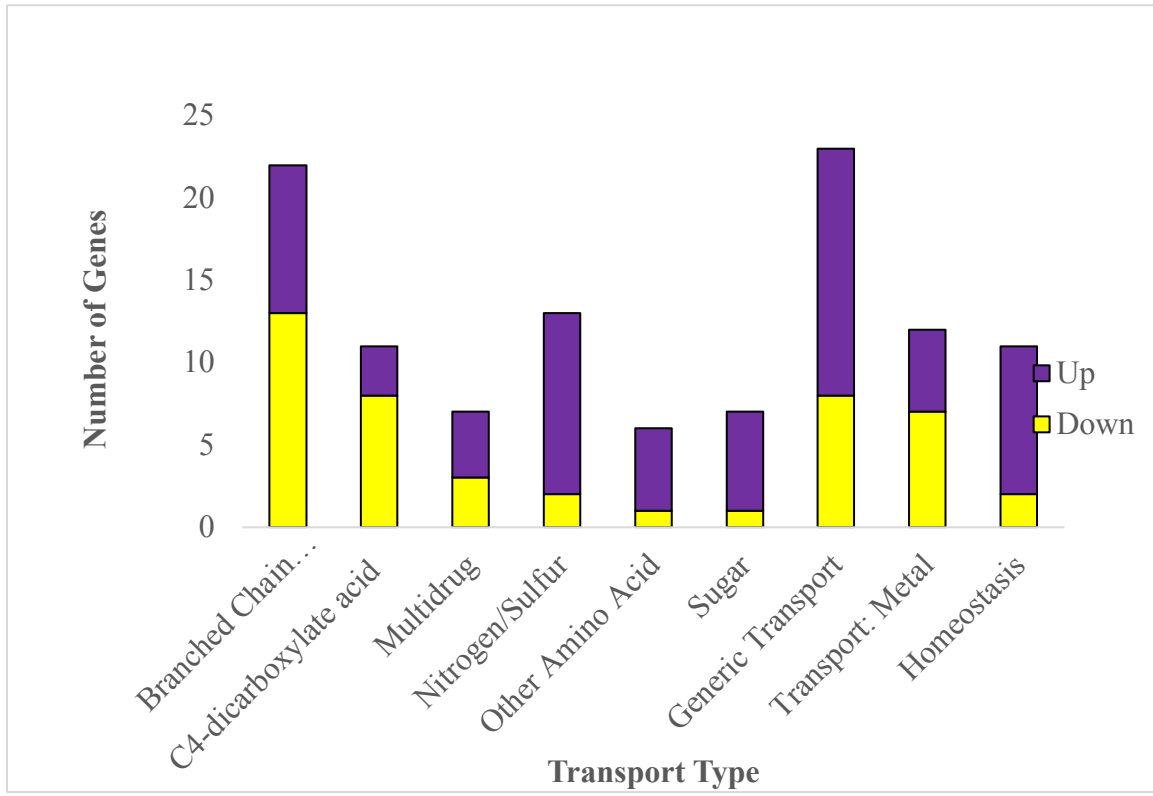

B.

### Homeostasis

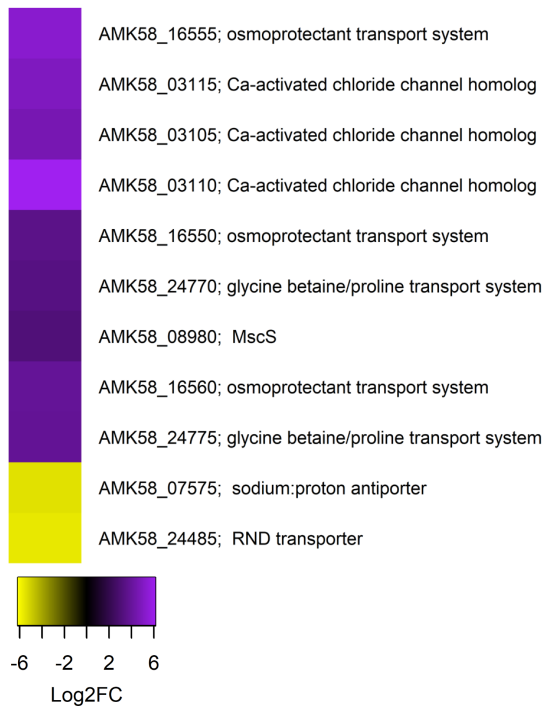

### Branched Chain Amino Acid Transport

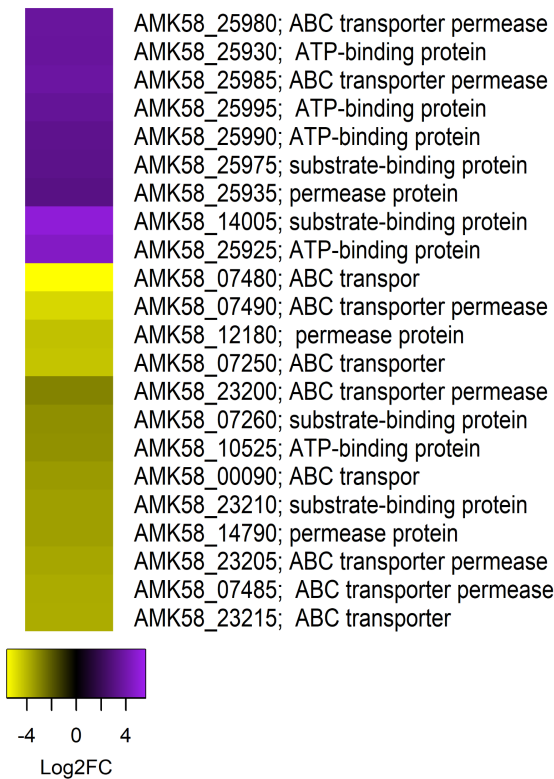

### Metal Transport

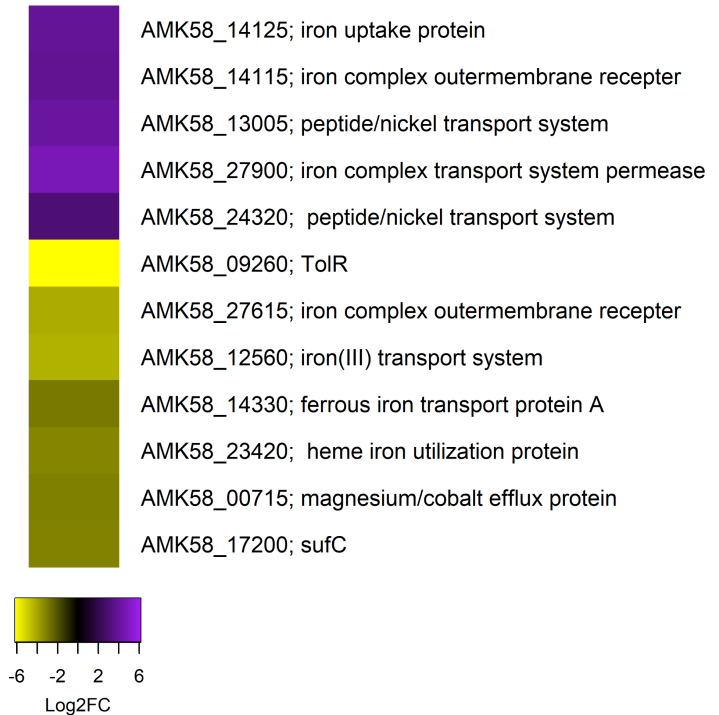

Figure S6. Global transport activity of cysts. (A) DEGs from the Transport COG were grouped based on the predicted substance transported. The number of genes up (purple) or down (yellow) regulated in cysts compared to vegetative cells in each group was calculated to assess overall enzyme patterns. (B) Heat-maps of branched-chain amino acid, metal transport, and homeostasis transport. Purple indicates genes up-regulated in cysts, yellow indicates genes down-regulated in cysts.

Supplemental Data File 1. This is a list of reads per kilobase transcript, per million reads (RPKM) for each annotated *A. brasiliense* gene in each replicate vegetative and cyst sample.

| Gene KEGG ID                                                                                                                                        | COG                                 | Vegetative R1 | Vegetative R2 | Vegetative R3 | Cyst R1  | Cyst R2  | Cyst R3  |
|-----------------------------------------------------------------------------------------------------------------------------------------------------|-------------------------------------|---------------|---------------|---------------|----------|----------|----------|
| <a href="#">AMK58_00005</a> <a href="#">no KO assigned   (GenBank) hypothetical protein</a>                                                         | Hypothetical                        | 0.000         | 0.000         | 0.000         | 0.000    | 0.000    | 0.000    |
| <a href="#">AMK58_00010</a> <a href="#">no KO assigned   (GenBank) pseudogene</a>                                                                   | Pseudogene                          | 0.000         | 0.000         | 0.121         | 0.000    | 0.000    | 0.000    |
| <a href="#">AMK58_00015</a> <a href="#">no KO assigned   (GenBank) pseudogene</a>                                                                   | Pseudogene                          | 0.000         | 0.000         | 0.000         | 0.000    | 0.000    | 0.000    |
| <a href="#">AMK58_00020</a> <a href="#">no KO assigned   (GenBank) pseudogene</a>                                                                   | Pseudogene                          | 0.000         | 0.000         | 0.000         | 0.000    | 0.000    | 0.000    |
| <a href="#">AMK58_00025</a> <a href="#">no KO assigned   (GenBank) pseudogene</a>                                                                   | Pseudogene                          | 0.000         | 0.000         | 0.000         | 0.000    | 0.000    | 0.000    |
| <a href="#">AMK58_00030</a> <a href="#">no KO assigned   (GenBank) ABC transporter substrate-binding protein</a>                                    | Transport                           | 0.000         | 0.000         | 0.000         | 0.000    | 0.000    | 0.000    |
| <a href="#">AMK58_00035</a> <a href="#">no KO assigned   (GenBank) pseudogene</a>                                                                   | Pseudogene                          | 0.000         | 0.000         | 0.000         | 0.000    | 0.000    | 0.000    |
| <a href="#">AMK58_00040</a> <a href="#">K10764 O-succinylhomoserine sulphydrylase [EC:2.5.1.-]   (GenBank) O-succinylhomoserine sulphydrylase</a>   | Metabolism                          | 0.000         | 0.000         | 0.000         | 0.000    | 0.000    | 0.000    |
| <a href="#">AMK58_00045</a> <a href="#">no KO assigned   (GenBank) hypothetical protein</a>                                                         | Hypothetical                        | 0.000         | 0.000         | 0.000         | 0.000    | 0.000    | 5.866    |
| <a href="#">AMK58_00050</a> <a href="#">no KO assigned   (GenBank) hypothetical protein</a>                                                         | Hypothetical                        | 91.302        | 67.197        | 99.392        | 278.286  | 161.378  | 280.981  |
| <a href="#">AMK58_00055</a> <a href="#">K03555 DNA mismatch repair protein MutS   (GenBank) DNA mismatch repair protein MutS</a>                    | DNA Repair and Replication          | 16.009        | 20.361        | 16.287        | 16.639   | 15.121   | 8.483    |
| <a href="#">AMK58_00060</a> <a href="#">no KO assigned   (GenBank) hypothetical protein</a>                                                         | Hypothetical                        | 15.557        | 22.900        | 15.221        | 67.955   | 38.522   | 39.305   |
| <a href="#">AMK58_00065</a> <a href="#">no KO assigned   (GenBank) hypothetical protein</a>                                                         | Hypothetical                        | 1029.324      | 1149.256      | 1084.844      | 1244.941 | 1016.671 | 1595.558 |
| <a href="#">AMK58_00070</a> <a href="#">K00990 [protein-PII] uridylyltransferase [EC:2.7.7.59]   (GenBank) protein-PII uridylyltransferase</a>      | Signal Transduction                 | 3.111         | 4.131         | 6.081         | 52.036   | 22.488   | 16.628   |
| <a href="#">AMK58_00075</a> <a href="#">K19302 undecaprenyl-diphosphate [EC:3.6.1.27]   (GenBank) hypothetical protein</a>                          | Hypothetical                        | 156.414       | 152.417       | 162.041       | 276.752  | 230.818  | 291.824  |
| <a href="#">AMK58_00080</a> <a href="#">no KO assigned   (GenBank) pirin</a>                                                                        | No COG                              | 19.465        | 17.057        | 15.670        | 108.472  | 71.912   | 85.075   |
| <a href="#">AMK58_00085</a> <a href="#">no KO assigned   (GenBank) hypothetical protein</a>                                                         | Hypothetical                        | 2225.861      | 2031.117      | 1878.650      | 475.104  | 577.051  | 604.480  |
| <a href="#">AMK58_00090</a> <a href="#">K01999 branched-chain amino acid transport system substrate-binding protein   (GenBank) ABC transporter</a> | Membrane Transport                  | 119.878       | 137.782       | 129.910       | 492.241  | 104.913  | 323.595  |
| <a href="#">AMK58_00095</a> <a href="#">no KO assigned   (GenBank) histidine kinase</a>                                                             | Signal Transduction                 | 4.142         | 4.604         | 6.090         | 136.768  | 18.351   | 49.213   |
| <a href="#">AMK58_00100</a> <a href="#">K03980 putative peptidoglycan lipid II flippase   (GenBank) multidrug transporter MurJ</a>                  | Cell Wall                           | 169.043       | 146.049       | 131.638       | 74.039   | 71.805   | 136.720  |
| <a href="#">AMK58_00105</a> <a href="#">K01867 tryptophanyl-tRNA synthetase [EC:6.1.1.2]   (GenBank) tryptophan--tRNA ligase</a>                    | tRNA synthesis/modification         | 24.603        | 29.687        | 24.314        | 142.866  | 20.979   | 69.003   |
| <a href="#">AMK58_00110</a> <a href="#">K01304 pyroglutamyl-peptidase [EC:3.4.19.3]   (GenBank) pyrrolidone-carboxylate peptidase</a>               | Peptidase                           | 15.477        | 26.921        | 13.784        | 216.248  | 70.909   | 193.474  |
| <a href="#">AMK58_00115</a> <a href="#">no KO assigned   (GenBank) hypothetical protein</a>                                                         | Hypothetical                        | 11.440        | 9.493         | 13.899        | 163.463  | 46.257   | 98.125   |
| <a href="#">AMK58_00120</a> <a href="#">K09858 SEC-C motif domain protein   (GenBank) hypothetical protein</a>                                      | Hypothetical                        | 169.505       | 147.685       | 193.784       | 150.698  | 89.028   | 219.861  |
| <a href="#">AMK58_00125</a> <a href="#">no KO assigned   (GenBank) MarR family transcriptional regulator</a>                                        | Transcription                       | 133.122       | 133.155       | 188.429       | 133.541  | 56.536   | 203.873  |
| <a href="#">AMK58_00130</a> <a href="#">no KO assigned   (GenBank) hypothetical protein</a>                                                         | Hypothetical                        | 67.465        | 82.772        | 90.942        | 480.909  | 423.175  | 578.105  |
| <a href="#">AMK58_00135</a> <a href="#">K00638 chloramphenicol O-acetyltransferase type B [EC:2.3.1.28]   (GenBank) chloramphenicol acetyltr</a>    | Defense                             | 8.567         | 13.648        | 14.661        | 126.485  | 111.699  | 61.431   |
| <a href="#">AMK58_00140</a> <a href="#">no KO assigned   (GenBank) TetR family transcriptional regulator</a>                                        | Transcription                       | 2.143         | 2.134         | 4.075         | 190.413  | 65.036   | 161.119  |
| <a href="#">AMK58_00145</a> <a href="#">no KO assigned   (GenBank) oxidoreductase</a>                                                               | Oxidoreductase                      | 16.830        | 20.500        | 27.653        | 530.332  | 1322.179 | 213.176  |
| <a href="#">AMK58_00150</a> <a href="#">no KO assigned   (GenBank) hypothetical protein</a>                                                         | Hypothetical                        | 16.766        | 19.793        | 19.855        | 151.427  | 113.750  | 53.808   |
| <a href="#">AMK58_00155</a> <a href="#">no KO assigned   (GenBank) transporter</a>                                                                  | Transport                           | 24.118        | 20.861        | 24.012        | 128.030  | 120.120  | 92.918   |
| <a href="#">AMK58_00160</a> <a href="#">K00797 spermidine synthase [EC:2.5.1.16]   (GenBank) spermidine synthase</a>                                | Metabolism: Amino Acid              | 101.950       | 125.180       | 95.331        | 52.932   | 288.941  | 104.576  |
| <a href="#">AMK58_00165</a> <a href="#">K01611 S-adenosylmethionine decarboxylase [EC:4.1.1.50]   (GenBank) S-adenosylmethionine decarboxy</a>      | Metabolism: Amino Acid              | 217.206       | 262.886       | 282.468       | 465.158  | 246.039  | 186.596  |
| <a href="#">AMK58_00170</a> <a href="#">K07010 putative glutamine amidotransferase   (GenBank) peptidase C26</a>                                    | Peptidase                           | 1678.840      | 1877.687      | 1977.115      | 60.873   | 353.983  | 134.665  |
| <a href="#">AMK58_00175</a> <a href="#">no KO assigned   (GenBank) transcriptional regulator</a>                                                    | Transcription                       | 238.481       | 289.342       | 310.705       | 314.215  | 55.812   | 239.735  |
| <a href="#">AMK58_00180</a> <a href="#">K16165 fumarylpyruvate hydrolase [EC:3.7.1.20]   (GenBank) fumarylacetoacetate hydrolase</a>                | Metabolism: Amino Acid              | 204.446       | 182.954       | 169.817       | 123.536  | 63.072   | 168.405  |
| <a href="#">AMK58_00185</a> <a href="#">K01142 exodeoxyribonuclease III [EC:3.1.1.2]   (GenBank) exodeoxyribonuclease III</a>                       | DNA Repair and Replication          | 24.976        | 17.288        | 34.029        | 191.971  | 25.164   | 68.915   |
| <a href="#">AMK58_00190</a> <a href="#">K15634 probable phosphoglycerate mutase [EC:5.4.2.12]   (GenBank) phosphoglycerate mutase</a>               | Metabolism: Carbon                  | 18.532        | 12.302        | 20.557        | 295.134  | 63.880   | 122.771  |
| <a href="#">AMK58_00195</a> <a href="#">no KO assigned   (GenBank) hypothetical protein</a>                                                         | Hypothetical                        | 97.725        | 117.252       | 106.028       | 145.334  | 106.680  | 173.024  |
| <a href="#">AMK58_00200</a> <a href="#">no KO assigned   (GenBank) hypothetical protein</a>                                                         | Hypothetical                        | 18.883        | 25.070        | 24.056        | 191.614  | 81.711   | 86.634   |
| <a href="#">AMK58_00205</a> <a href="#">no KO assigned   (GenBank) glycosyl transferase</a>                                                         | Transferase                         | 89.073        | 104.957       | 96.248        | 178.595  | 199.497  | 158.851  |
| <a href="#">AMK58_00210</a> <a href="#">no KO assigned   (GenBank) hypothetical protein</a>                                                         | Hypothetical                        | 249.121       | 280.425       | 233.599       | 391.851  | 227.374  | 431.050  |
| <a href="#">AMK58_00215</a> <a href="#">no KO assigned   (GenBank) multidrug transporter</a>                                                        | Membrane Transport                  | 21.647        | 25.756        | 25.727        | 29.058   | 15.053   | 19.477   |
| <a href="#">AMK58_00220</a> <a href="#">no KO assigned   (GenBank) cyclic nucleotide-binding protein</a>                                            | cyclic nucleotide                   | 37.703        | 49.175        | 52.510        | 405.465  | 123.260  | 157.079  |
| <a href="#">AMK58_00225</a> <a href="#">no KO assigned   (GenBank) hypothetical protein</a>                                                         | Hypothetical                        | 43.809        | 59.343        | 54.279        | 105.463  | 55.589   | 64.376   |
| <a href="#">AMK58_00230</a> <a href="#">no KO assigned   (GenBank) hypothetical protein</a>                                                         | Hypothetical                        | 15.227        | 19.431        | 17.851        | 124.560  | 38.884   | 56.203   |
| <a href="#">AMK58_00235</a> <a href="#">no KO assigned   (GenBank) hypothetical protein</a>                                                         | Hypothetical                        | 113.679       | 135.077       | 150.679       | 715.826  | 223.022  | 369.138  |
| <a href="#">AMK58_00240</a> <a href="#">K02031 peptide/nickel transport system ATP-binding protein K02032 peptide/nickel transport system A T</a>   | Quorum Sensing                      | 63.821        | 81.896        | 61.045        | 197.971  | 84.996   | 178.366  |
| <a href="#">AMK58_00245</a> <a href="#">K02035 peptide/nickel transport system substrate-binding protein   (GenBank) peptide ABC transporter</a>    | Quorum Sensing                      | 34.593        | 33.671        | 37.264        | 73.240   | 48.787   | 76.168   |
| <a href="#">AMK58_00250</a> <a href="#">K02033 peptide/nickel transport system permease protein   (GenBank) ABC transporter permease</a>            | Quorum Sensing                      | 125.438       | 136.127       | 128.947       | 190.759  | 141.815  | 248.140  |
| <a href="#">AMK58_00255</a> <a href="#">K02034 peptide/nickel transport system permease protein   (GenBank) peptide ABC transporter permease</a>    | Quorum Sensing                      | 46.964        | 56.734        | 46.421        | 91.809   | 26.685   | 76.474   |
| <a href="#">AMK58_00260</a> <a href="#">no KO assigned   (GenBank) hypothetical protein</a>                                                         | Hypothetical                        | 55.661        | 67.226        | 72.181        | 290.206  | 78.249   | 212.436  |
| <a href="#">AMK58_00265</a> <a href="#">no KO assigned   (GenBank) MBL fold metallo-hydrolase</a>                                                   | Hydrolase                           | 32.204        | 38.810        | 39.424        | 128.860  | 81.563   | 74.462   |
| <a href="#">AMK58_00270</a> <a href="#">no KO assigned   (GenBank) hypothetical protein</a>                                                         | Hypothetical                        | Data File 1   | 17.592        | 32.938        | 453.146  | 662.164  | 351.104  |
| <a href="#">AMK58_00275</a> <a href="#">no KO assigned   (GenBank) sorbosone dehydrogenase</a>                                                      | Metabolism: Carbohydrate            | 3.459         | 2.650         | 5.819         | 97.430   | 198.507  | 73.859   |
| <a href="#">AMK58_00280</a> <a href="#">no KO assigned   (GenBank) hypothetical protein</a>                                                         | Hypothetical                        | 112.949       | 127.841       | 127.481       | 265.230  | 99.558   | 342.335  |
| <a href="#">AMK58_00285</a> <a href="#">no KO assigned   (GenBank) two-component system response regulator</a>                                      | Signal Transduction                 | 87.911        | 81.771        | 90.594        | 203.320  | 104.141  | 172.635  |
| <a href="#">AMK58_00290</a> <a href="#">K01497 GTP cyclohydrolase II [EC:3.5.4.25]   (GenBank) GTP cyclohydrolase</a>                               | Metabolism: Co-Factors and Vitamins | 52.608        | 72.532        | 63.435        | 226.943  | 44.504   | 94.623   |
| <a href="#">AMK58_00295</a> <a href="#">no KO assigned   (GenBank) hypothetical protein</a>                                                         | Hypothetical                        | 14.744        | 19.409        | 19.246        | 79.838   | 15.028   | 21.782   |
| <a href="#">AMK58_00300</a> <a href="#">no KO assigned   (GenBank) hypothetical protein</a>                                                         | Hypothetical                        | 55.667        | 84.530        | 61.970        | 465.430  | 79.779   | 198.300  |
| <a href="#">AMK58_00305</a> <a href="#">K06997 PLP dependent protein   (GenBank) alanine racemase</a>                                               | No COG                              | 129.112       | 124.646       | 98.697        | 66.203   | 104.761  | 160.793  |
| <a href="#">AMK58_00310</a> <a href="#">no KO assigned   (GenBank) hypothetical protein</a>                                                         | Hypothetical                        | 1294.845      | 864.744       | 776.099       | 257.290  | 114.242  | 512.169  |
| <a href="#">AMK58_00315</a> <a href="#">no KO assigned   (GenBank) hypothetical protein</a>                                                         | Hypothetical                        | 27910.875     | 25033.849     | 24577.595     | 149.721  | 942.075  | 310.341  |
| <a href="#">AMK58_00320</a> <a href="#">no KO assigned   (GenBank) hypothetical protein</a>                                                         | Hypothetical                        | 188.373       | 175.135       | 180.382       | 53.371   | 54.878   | 78.771   |
| <a href="#">AMK58_00325</a> <a href="#">no KO assigned   (GenBank) hypothetical protein</a>                                                         | Hypothetical                        | 1139.448      | 1039.489      | 1065.703      | 852.677  | 432.222  | 858.447  |
| <a href="#">AMK58_00330</a> <a href="#">K01869 leucyl-tRNA synthetase [EC:6.1.1.4]   (GenBank) leucine--tRNA ligase</a>                             | tRNA synthesis/modification         | 31.505        | 28.135        | 26.821        | 43.716   | 15.616   | 38.471   |

|                             |                                                                                                                       |                                     |         |         |         |          |          |          |
|-----------------------------|-----------------------------------------------------------------------------------------------------------------------|-------------------------------------|---------|---------|---------|----------|----------|----------|
| <a href="#">AMK58_00335</a> | <a href="#">K03643 LPS-assembly lipoprotein   (GenBank) hypothetical protein.</a>                                     | Hypothetical                        | 69.530  | 61.590  | 70.698  | 471.867  | 126.231  | 251.590  |
| <a href="#">AMK58_00340</a> | <a href="#">K02340 DNA polymerase III subunit delta [EC:2.7.7.71]   (GenBank) DNA polymerase III subunit delta.</a>   | DNA Repair and Replication          | 15.741  | 16.970  | 21.493  | 200.711  | 114.276  | 287.204  |
| <a href="#">AMK58_00345</a> | <a href="#">no KO assigned   (GenBank) glycerophosphodiester phosphodiesterase.</a>                                   | enzyme                              | 105.818 | 144.141 | 112.420 | 105.391  | 82.952   | 161.537  |
| <a href="#">AMK58_00350</a> | <a href="#">K03497 chromosome partitioning protein, ParB family   (GenBank) chromosome partitioning protein ParB.</a> | Cell Cycle/Shape/Homeostasis        | 172.283 | 203.963 | 192.368 | 64.520   | 133.267  | 156.196  |
| <a href="#">AMK58_00355</a> | <a href="#">K03496 chromosome partitioning protein   (GenBank) chromosome partitioning protein ParA.</a>              | Cell Cycle/Shape/Homeostasis        | 64.363  | 71.708  | 65.477  | 137.466  | 60.711   | 195.324  |
| <a href="#">AMK58_00360</a> | <a href="#">K03501 16S rRNA (guanine527-N7)-methyltransferase [EC:2.1.1.1701]   (GenBank) 16S rRNA (guanine5-</a>     | Ribosome                            | 370.312 | 450.480 | 435.580 | 516.621  | 353.178  | 591.287  |
| <a href="#">AMK58_00365</a> | <a href="#">K03495 rRNA uridine 5-carboxymethylaminomethyl modification enzyme   (GenBank) rRNA uridine 5-car</a>     | rRNA synthesis/modification         | 12.697  | 13.546  | 16.322  | 148.302  | 29.782   | 88.122   |
| <a href="#">AMK58_00370</a> | <a href="#">K03650 rRNA modification GTPase [EC:3.6.-.-1]   (GenBank) rRNA modification GTPase MnmF.</a>              | rRNA synthesis/modification         | 35.541  | 30.411  | 32.323  | 63.925   | 67.025   | 47.538   |
| <a href="#">AMK58_00375</a> | <a href="#">no KO assigned   (GenBank) ferredoxin.</a>                                                                | Ferredoxin                          | 150.335 | 154.718 | 128.549 | 91.004   | 260.089  | 195.224  |
| <a href="#">AMK58_00380</a> | <a href="#">no KO assigned   (GenBank) ribosomal protein S1.</a>                                                      | Ribosome                            | 937.369 | 970.215 | 839.637 | 1445.514 | 1886.943 | 1385.550 |
| <a href="#">AMK58_00385</a> | <a href="#">K06888 uncharacterized protein   (GenBank) thymidylate kinase.</a>                                        | Signal Transduction                 | 15.052  | 16.122  | 17.619  | 67.879   | 108.187  | 21.409   |
| <a href="#">AMK58_00390</a> | <a href="#">K00567 methylated-DNA-[protein]-cysteine S-methyltransferase [EC:2.1.1.631]   (GenBank) cysteine meth</a> | DNA Repair and Replication          | 882.779 | 914.587 | 966.823 | 384.026  | 844.195  | 309.494  |
| <a href="#">AMK58_00395</a> | <a href="#">no KO assigned   (GenBank) quinone oxidoreductase.</a>                                                    | Energy                              | 75.377  | 77.158  | 86.782  | 64.043   | 127.579  | 83.022   |
| <a href="#">AMK58_00400</a> | <a href="#">K02342 DNA polymerase III subunit epsilon [EC:2.7.7.71]   (GenBank) DNA polymerase III subunit epsil</a>  | DNA Repair and Replication          | 11.072  | 7.468   | 13.074  | 105.014  | 35.328   | 31.131   |
| <a href="#">AMK58_00405</a> | <a href="#">K00859 dephospho-CoA kinase [EC:2.7.1.241]   (GenBank) dephospho-CoA kinase.</a>                          | Metabolism: Co-Factors and Vitamins | 71.894  | 68.410  | 68.179  | 304.004  | 95.160   | 182.591  |
| <a href="#">AMK58_00410</a> | <a href="#">K00014 shikimate dehydrogenase [EC:1.1.1.251]   (GenBank) shikimate dehydrogenase.</a>                    | Biosynthesis: Amino Acid            | 69.388  | 54.146  | 68.533  | 124.817  | 64.784   | 93.886   |
| <a href="#">AMK58_00415</a> | <a href="#">K06287 septum formation protein   (GenBank) septum formation protein Maf.</a>                             | No COG                              | 278.532 | 217.363 | 231.750 | 109.722  | 289.617  | 257.538  |
| <a href="#">AMK58_00420</a> | <a href="#">K09773 [pvrutate, water dikinase]-phosphate phosphotransferase / [pvrutate, water dikinase] kinase  </a>  | Signal Transduction                 | 277.374 | 272.643 | 242.441 | 99.527   | 117.979  | 239.218  |
| <a href="#">AMK58_00425</a> | <a href="#">K01599 uroporphyrinogen decarboxylase [EC:4.1.1.371]   (GenBank) uroporphyrinogen decarboxylase.</a>      | Metabolism: Co-Factors and Vitamins | 75.975  | 64.943  | 55.525  | 35.473   | 35.226   | 89.215   |
| <a href="#">AMK58_00430</a> | <a href="#">no KO assigned   (GenBank) hypothetical protein.</a>                                                      | Membrane                            | 60.114  | 50.584  | 47.497  | 48.769   | 63.129   | 96.829   |
| <a href="#">AMK58_00435</a> | <a href="#">no KO assigned   (GenBank) AbrB family transcriptional regulator.</a>                                     | Transcription                       | 112.465 | 115.737 | 114.607 | 302.747  | 362.310  | 346.290  |
| <a href="#">AMK58_00440</a> | <a href="#">K07341 death on curing protein   (GenBank) death-on-curing protein.</a>                                   | Defense                             | 253.603 | 239.489 | 261.870 | 988.822  | 1436.641 | 777.038  |
| <a href="#">AMK58_00445</a> | <a href="#">no KO assigned   (GenBank) carbonate dehydratase.</a>                                                     | Membrane                            | 164.235 | 142.835 | 137.206 | 51.035   | 287.071  | 119.562  |
| <a href="#">AMK58_00450</a> | <a href="#">K03628 transcription termination factor Rho   (GenBank) transcription termination factor Rho.</a>         | Transcription                       | 221.152 | 210.044 | 198.276 | 61.287   | 365.730  | 108.608  |
| <a href="#">AMK58_00455</a> | <a href="#">K03071 prepotein translocase subunit SecB   (GenBank) prepotein translocase subunit SecB.</a>             | Chaperone                           | 91.900  | 92.961  | 85.299  | 302.877  | 782.126  | 234.233  |
| <a href="#">AMK58_00460</a> | <a href="#">K07113 UPF0716 protein FxsA   (GenBank) hypothetical protein.</a>                                         | Membrane                            | 563.047 | 746.879 | 651.779 | 261.343  | 4063.765 | 243.890  |
| <a href="#">AMK58_00465</a> | <a href="#">no KO assigned   (GenBank) translocase.</a>                                                               | Membrane                            | 37.130  | 35.364  | 43.830  | 455.562  | 287.509  | 225.205  |
| <a href="#">AMK58_00470</a> | <a href="#">K08304 membrane-bound lytic murein transglycosylase A   (GenBank) murein transglycosylase.</a>            | Cell Wall                           | 8.634   | 14.395  | 10.118  | 118.345  | 110.703  | 135.636  |
| <a href="#">AMK58_00475</a> | <a href="#">no KO assigned   (GenBank) hypothetical protein.</a>                                                      | Hypothetical                        | 168.471 | 137.292 | 127.000 | 65.413   | 93.150   | 61.928   |
| <a href="#">AMK58_00480</a> | <a href="#">no KO assigned   (GenBank) hypothetical protein.</a>                                                      | Hypothetical                        | 188.339 | 211.714 | 186.873 | 139.330  | 196.579  | 153.040  |
| <a href="#">AMK58_00485</a> | <a href="#">K01523 phosphoribosyl-ATP pyrophosphohydrolase [EC:3.6.1.311]   (GenBank) phosphoribosyl-ATP pyr</a>      | Biosynthesis: Amino Acid            | 463.039 | 475.779 | 444.373 | 296.375  | 541.538  | 425.021  |
| <a href="#">AMK58_00490</a> | <a href="#">K02500 cyclase [EC:4.1.3.-1]   (GenBank) imidazole glycerol phosphate synthase subunit HsfF.</a>          | Biosynthesis: Amino Acid            | 393.416 | 331.308 | 297.464 | 119.473  | 471.478  | 209.541  |
| <a href="#">AMK58_00495</a> | <a href="#">K01814 phosphoribosylformimino-5-aminoimidazole carboxamide ribotide isomerase [EC:5.3.1.161]   (Gen</a>  | Biosynthesis: Amino Acid            | 91.637  | 76.591  | 65.460  | 196.743  | 77.742   | 112.563  |
| <a href="#">AMK58_00500</a> | <a href="#">no KO assigned   (GenBank) acetyltransferase.</a>                                                         | Acetyltransferase                   | 216.062 | 233.126 | 226.634 | 281.361  | 192.235  | 207.999  |
| <a href="#">AMK58_00505</a> | <a href="#">K02501 glutamine amidotransferase [EC:2.4.2.-1]   (GenBank) imidazole glycerol phosphate synthase sub</a> | Biosynthesis: Amino Acid            | 303.532 | 296.071 | 305.199 | 96.306   | 271.975  | 183.635  |
| <a href="#">AMK58_00510</a> | <a href="#">K01693 imidazoleglycerol-phosphate dehydratase [EC:4.2.1.191]   (GenBank) imidazoleglycerol-phosphate</a> | Biosynthesis: Amino Acid            | 32.896  | 28.981  | 37.266  | 612.096  | 70.228   | 440.982  |
| <a href="#">AMK58_00515</a> | <a href="#">no KO assigned   (GenBank) hypothetical protein.</a>                                                      | Hypothetical                        | 32.504  | 33.450  | 32.088  | 115.416  | 203.746  | 58.262   |
| <a href="#">AMK58_00520</a> | <a href="#">K01419 ATP-dependent HslUV protease, peptidase subunit HslV [EC:3.4.25.21]   (GenBank) ATP-depend</a>     | enzyme                              | 260.675 | 238.483 | 230.238 | 358.641  | 1050.570 | 486.502  |
| <a href="#">AMK58_00525</a> | <a href="#">K03667 ATP-dependent HslUV protease ATP-binding subunit HslU   (GenBank) ATP-dependent protea</a>         | enzyme                              | 32.395  | 35.681  | 34.673  | 189.217  | 156.945  | 112.270  |
| <a href="#">AMK58_00530</a> | <a href="#">no KO assigned   (GenBank) ABC transporter.</a>                                                           | Transport                           | 35.156  | 36.412  | 37.949  | 162.285  | 72.934   | 172.850  |
| <a href="#">AMK58_00535</a> | <a href="#">no KO assigned   (GenBank) hypothetical protein.</a>                                                      | Hypothetical                        | 3.298   | 1.407   | 2.538   | 28.503   | 7.678    | 25.046   |
| <a href="#">AMK58_00540</a> | <a href="#">no KO assigned   (GenBank) XRE family transcriptional regulator.</a>                                      | Transcription                       | 12.855  | 21.433  | 23.024  | 221.454  | 18.482   | 73.460   |
| <a href="#">AMK58_00545</a> | <a href="#">no KO assigned   (GenBank) DNA mismatch repair protein MutS.</a>                                          | DNA Repair and Replication          | 38.496  | 48.224  | 57.264  | 341.838  | 40.944   | 169.460  |
| <a href="#">AMK58_00550</a> | <a href="#">K00782 L-lactate dehydrogenase complex protein LldG   (GenBank) L-lactate dehydrogenase.</a>              | Metabolism: Carbohydrate            | 133.764 | 121.086 | 141.930 | 413.845  | 139.659  | 337.136  |
| <a href="#">AMK58_00555</a> | <a href="#">K18929 L-lactate dehydrogenase complex protein LldF   (GenBank) (Fe-S)-binding protein.</a>               | Metabolism: Carbohydrate            | 37.523  | 31.883  | 36.153  | 111.140  | 34.398   | 103.687  |
| <a href="#">AMK58_00560</a> | <a href="#">K18928 L-lactate dehydrogenase complex protein LldE   (GenBank) Fe-S oxidoreductase.</a>                  | Metabolism: Carbohydrate            | 61.154  | 49.696  | 64.443  | 392.052  | 33.590   | 355.092  |
| <a href="#">AMK58_00565</a> | <a href="#">no KO assigned   (GenBank) hypothetical protein.</a>                                                      | Hypothetical                        | 4.824   | 4.434   | 5.910   | 117.694  | 9.386    | 68.050   |
| <a href="#">AMK58_00570</a> | <a href="#">K06895 L-lysine exporter family protein LvsE/ArgO   (GenBank) amino acid transporter.</a>                 | Transport                           | 5.247   | 10.850  | 9.593   | 342.753  | 30.848   | 157.739  |
| <a href="#">AMK58_00575</a> | <a href="#">K05596 LvsR family transcriptional regulator, chromosome initiation inhibitor   (GenBank) LvsR fami</a>   | Transcription                       | 9.440   | 8.174   | 12.618  | 196.822  | 17.069   | 99.330   |
| <a href="#">AMK58_00580</a> | <a href="#">K09816 zinc transport system permease protein   (GenBank) hypothetical protein.</a>                       | Transport: Metal                    | 17.494  | 24.754  | 24.512  | 168.147  | 18.629   | 132.048  |
| <a href="#">AMK58_00585</a> | <a href="#">K09817 zinc transport system ATP-binding protein [EC:3.6.3.-1]   (GenBank) zinc ABC transporter ATP-b</a> | Transport: Metal                    | 8.421   | 8.544   | 13.446  | 330.331  | 51.258   | 248.850  |
| <a href="#">AMK58_00590</a> | <a href="#">K09815 zinc transport system substrate-binding protein   (GenBank) zinc transporter.</a>                  | Transport: Metal                    | 33.066  | 47.322  | 47.339  | 144.165  | 46.778   | 62.139   |
| <a href="#">AMK58_00595</a> | <a href="#">K00215 4-hydroxy-tetrahydropicolinate reductase [EC:1.1.7.1.81]   (GenBank) 4-hydroxy-tetrahydropi</a>    | Biosynthesis: Amino Acid            | 35.807  | 26.287  | 44.865  | 251.002  | 121.427  | 140.407  |
| <a href="#">AMK58_00600</a> | <a href="#">K10778 AraC family transcriptional regulator, regulatory protein of adaptive response / methylated.</a>   | Transcription                       | 55.241  | 44.859  | 65.400  | 137.400  | 196.981  | 115.254  |
| <a href="#">AMK58_00605</a> | <a href="#">no KO assigned   (GenBank) hypothetical protein.</a>                                                      | Hypothetical                        | 138.913 | 109.236 | 130.171 | 152.927  | 142.108  | 262.583  |
| <a href="#">AMK58_00610</a> | <a href="#">K10773 endonuclease III [EC:4.2.99.181]   (GenBank) endonuclease III.</a>                                 | DNA Repair and Replication          | 43.908  | 44.652  | 43.525  | 142.914  | 150.585  | 84.549   |
| <a href="#">AMK58_00615</a> | <a href="#">no KO assigned   (GenBank) hypothetical protein.</a>                                                      | Hypothetical                        | 28.280  | 22.000  | 25.629  | 180.733  | 81.788   | 230.003  |
| <a href="#">AMK58_00620</a> | <a href="#">no KO assigned   (GenBank) hypothetical protein.</a>                                                      | Hypothetical                        | 121.075 | 115.862 | 103.159 | 412.135  | 91.318   | 237.014  |
| <a href="#">AMK58_00625</a> | <a href="#">no KO assigned   (GenBank) carbohydrate kinase.</a>                                                       | Signal Transduction                 | 106.774 | 107.888 | 106.937 | 202.773  | 71.657   | 128.790  |
| <a href="#">AMK58_00630</a> | <a href="#">K07090 uncharacterized protein   (GenBank) permease.</a>                                                  | Membrane                            | 29.280  | 41.762  | 34.736  | 167.309  | 70.567   | 132.204  |
| <a href="#">AMK58_00635</a> | <a href="#">no KO assigned   (GenBank) hypothetical protein.</a>                                                      | Hypothetical                        | 96.394  | 125.196 | 118.071 | 96.064   | 163.486  | 138.610  |
| <a href="#">AMK58_00640</a> | <a href="#">no KO assigned   (GenBank) universal stress protein.</a>                                                  | Stress Response                     | 86.419  | 83.867  | 109.905 | 466.578  | 241.861  | 236.743  |
| <a href="#">AMK58_00645</a> | <a href="#">no KO assigned   (GenBank) hypothetical protein.</a>                                                      | Hypothetical                        | 35.159  | 46.843  | 41.355  | 202.097  | 50.931   | 122.907  |
| <a href="#">AMK58_00650</a> | <a href="#">K01768 adenylate cyclase [EC:4.6.1.11]   (GenBank) adenylate cyclase.</a>                                 | cyclic nucleotide                   | 153.848 | 140.604 | 152.105 | 94.836   | 449.162  | 112.270  |
| <a href="#">AMK58_00655</a> | <a href="#">no KO assigned   (GenBank) iron transporter.</a>                                                          | Transport: Metal                    | 80.935  | 76.897  | 93.962  | 464.933  | 429.613  | 184.689  |
| <a href="#">AMK58_00660</a> | <a href="#">no KO assigned   (GenBank) chitin deacetylase.</a>                                                        | Metabolism: carbohydrate            | 29.695  | 37.675  | 25.618  | 116.571  | 88.796   | 104.402  |
| <a href="#">AMK58_00665</a> | <a href="#">K08641 D-alanyl-D-alanine dipeptidase [EC:3.4.13.221]   (GenBank) D-alanyl-D-alanine dipeptidase.</a>     | Defense                             | 28.295  | 31.450  | 28.780  | 184.222  | 70.266   | 48.813   |

|                             |                                                                                                                       |                                       |          |          |          |          |          |          |
|-----------------------------|-----------------------------------------------------------------------------------------------------------------------|---------------------------------------|----------|----------|----------|----------|----------|----------|
| <a href="#">AMK58_00670</a> | <a href="#">K14742 tRNA threonylcarbamoyladenosine biosynthesis protein TsaB</a>   (GenBank) tRNA threonylcarbam      | tRNA synthesis/modification           | 33.930   | 46.943   | 38.882   | 98.795   | 54.799   | 60.771   |
| <a href="#">AMK58_00675</a> | <a href="#">K03789 ribosomal-protein-alanine N-acetyltransferase [EC:2.3.1.128]</a>   (GenBank) alanine acetyltransf  | Ribosome                              | 39.178   | 49.352   | 48.247   | 29.402   | 41.120   | 94.981   |
| <a href="#">AMK58_00680</a> | no KO assigned   (GenBank) SirA protein                                                                               | No COG                                | 726.449  | 743.212  | 769.717  | 323.100  | 587.602  | 416.939  |
| <a href="#">AMK58_00685</a> | no KO assigned   (GenBank) MucR family transcriptional regulator                                                      | Transcription                         | 329.544  | 376.422  | 284.623  | 367.932  | 517.937  | 424.848  |
| <a href="#">AMK58_00690</a> | no KO assigned   (GenBank) hemolysin-like protein                                                                     | No COG                                | 50.631   | 42.963   | 50.373   | 344.817  | 181.293  | 182.217  |
| <a href="#">AMK58_00695</a> | <a href="#">K00655 1-acyl-sn-glycerol-3-phosphate acyltransferase [EC:2.3.1.51]</a>   (GenBank) acyl-phosphate glvce  | Metabolism: Lipid                     | 381.371  | 412.850  | 467.101  | 363.071  | 1352.610 | 293.732  |
| <a href="#">AMK58_00700</a> | <a href="#">K06168 tRNA-2-methylthio-N6-dimethylalanyladenosine synthase [EC:2.8.4.31]</a>   (GenBank) (dimethylalyl) | tRNA synthesis/modification           | 92.465   | 108.235  | 116.910  | 142.003  | 175.107  | 104.619  |
| <a href="#">AMK58_00705</a> | <a href="#">K06217 phosphate starvation-inducible protein PhoH and related proteins</a>   (GenBank) phosphate starva  | Starvation                            | 116.453  | 132.009  | 133.234  | 43.491   | 128.870  | 85.927   |
| <a href="#">AMK58_00710</a> | <a href="#">K07042 probable rRNA maturation factor I</a>   (GenBank) rRNA maturation factor                           | Ribosome                              | 714.364  | 843.234  | 856.129  | 199.143  | 536.940  | 345.266  |
| <a href="#">AMK58_00715</a> | no KO assigned   (GenBank) magnesium/cobalt efflux protein                                                            | No COG                                | 46.425   | 39.398   | 49.785   | 299.638  | 81.389   | 241.539  |
| <a href="#">AMK58_00720</a> | <a href="#">K03820 apolipoprotein N-acyltransferase [EC:2.3.1.-1]</a>   (GenBank) acyltransferase                     | Biosynthesis: Lipoprotein             | 750.588  | 968.114  | 992.340  | 32.335   | 322.087  | 83.531   |
| <a href="#">AMK58_00725</a> | no KO assigned   (GenBank) transcriptional regulator                                                                  | Transcription                         | 1435.318 | 1056.188 | 1106.696 | 454.717  | 596.695  | 543.670  |
| <a href="#">AMK58_00730</a> | <a href="#">K00789 S-adenosylmethionine synthetase [EC:2.5.1.6]</a>   (GenBank) S-adenosylmethionine synthetase       | Biosynthesis: Amino Acid              | 43.773   | 27.821   | 31.682   | 103.827  | 52.576   | 145.375  |
| <a href="#">AMK58_00735</a> | <a href="#">K03439 tRNA (guanine-N7)-methyltransferase [EC:2.1.1.33]</a>   (GenBank) tRNA (guanine-N7)-methyltra      | tRNA synthesis/modification           | 57.728   | 49.852   | 59.583   | 55.431   | 35.794   | 89.058   |
| <a href="#">AMK58_00740</a> | no KO assigned   (GenBank) antibiotic biosynthesis monooxygenase                                                      | Biosynthesis                          | 601.915  | 652.168  | 611.044  | 120.996  | 3809.745 | 330.394  |
| <a href="#">AMK58_00745</a> | <a href="#">K09748 ribosome maturation factor Rimp</a>   (GenBank) ribosome maturation factor Rimp                    | Ribosome                              | 871.938  | 1018.056 | 943.217  | 654.083  | 3804.449 | 901.160  |
| <a href="#">AMK58_00750</a> | <a href="#">K02600 N utilization substance protein A</a>   (GenBank) transcription elongation factor NusA             | Transcription                         | 45.245   | 51.803   | 47.367   | 116.782  | 348.473  | 104.230  |
| <a href="#">AMK58_00755</a> | <a href="#">K07742 uncharacterized protein</a>   (GenBank) hypothetical protein                                       | Hypothetical                          | 1004.416 | 916.250  | 1089.313 | 407.943  | 2106.231 | 626.839  |
| <a href="#">AMK58_00760</a> | <a href="#">K02519 translation initiation factor IF-2</a>   (GenBank) translation initiation factor IF-2              | Translation                           | 13.246   | 9.793    | 12.763   | 33.766   | 32.368   | 31.508   |
| <a href="#">AMK58_00765</a> | <a href="#">K02834 ribosome-binding factor A</a>   (GenBank) ribosome-binding factor A                                | Ribosome                              | 578.255  | 821.589  | 648.483  | 239.131  | 385.957  | 417.200  |
| <a href="#">AMK58_00770</a> | <a href="#">K03177 tRNA pseudouridine55 synthase [EC:5.4.99.25]</a>   (GenBank) pseudouridine synthase                | tRNA synthesis/modification           | 737.151  | 795.768  | 721.240  | 22.108   | 265.809  | 73.412   |
| <a href="#">AMK58_00775</a> | <a href="#">K02956 small subunit ribosomal protein S15</a>   (GenBank) 30S ribosomal protein S15                      | Ribosome                              | 8866.710 | 8203.388 | 8649.270 | 1284.272 | 894.687  | 1462.001 |
| <a href="#">AMK58_00780</a> | <a href="#">K00962 polyribonucleotide nucleotidytransferase [EC:2.7.7.8]</a>   (GenBank) polyribonucleotide nucleot   | Metabolism: Nucleotide                | 15.241   | 16.711   | 18.399   | 54.597   | 19.634   | 51.133   |
| <a href="#">AMK58_00785</a> | no KO assigned   (GenBank) hypothetical protein                                                                       | Hypothetical                          | 13.217   | 22.561   | 26.928   | 309.196  | 115.666  | 310.109  |
| <a href="#">AMK58_00790</a> | <a href="#">K07054 uncharacterized protein</a>   (GenBank) flagellar biosynthesis protein FleM                        | Motility                              | 233.331  | 200.932  | 218.015  | 107.123  | 171.377  | 127.793  |
| <a href="#">AMK58_00795</a> | <a href="#">K05770 benzodiazapine receptor</a>   (GenBank) hypothetical protein                                       | Transport                             | 58.683   | 57.347   | 49.781   | 366.452  | 199.849  | 273.291  |
| <a href="#">AMK58_00800</a> | <a href="#">K01843 lysine 2,3-aminomutase [EC:5.4.3.21]</a>   (GenBank) lysine 2,3-aminomutase                        | Metabolism: Amino Acid                | 29.245   | 32.149   | 41.376   | 238.343  | 47.994   | 97.626   |
| <a href="#">AMK58_00805</a> | <a href="#">K01126 glycerophosphoryl diester phosphodiesterase [EC:3.1.4.46]</a>   (GenBank) glycerophosphodiester p  | Metabolism: Lipid                     | 781.659  | 732.036  | 658.787  | 344.699  | 412.635  | 539.793  |
| <a href="#">AMK58_00810</a> | no KO assigned   (GenBank) 2-nitropropane dioxygenase                                                                 | No COG                                | 66.095   | 84.800   | 73.982   | 81.437   | 116.871  | 73.736   |
| <a href="#">AMK58_00815</a> | <a href="#">K09826 Fur family transcriptional regulator, iron response regulator</a>   (GenBank) Fur family transcri  | Transcription                         | 49.607   | 55.256   | 40.238   | 136.657  | 174.842  | 161.388  |
| <a href="#">AMK58_00820</a> | no KO assigned   (GenBank) rubrerythrin                                                                               | No COG                                | 17.585   | 17.223   | 21.105   | 447.556  | 113.087  | 141.674  |
| <a href="#">AMK58_00825</a> | no KO assigned   (GenBank) hypothetical protein                                                                       | Hypothetical                          | 38.320   | 46.275   | 42.443   | 329.286  | 69.192   | 164.246  |
| <a href="#">AMK58_00830</a> | no KO assigned   (GenBank) hypothetical protein                                                                       | Hypothetical                          | 297.997  | 308.892  | 300.554  | 291.642  | 299.895  | 352.385  |
| <a href="#">AMK58_00835</a> | no KO assigned   (GenBank) D-glycerate dehydrogenase                                                                  | Energy                                | 194.087  | 241.849  | 198.028  | 49.803   | 287.445  | 92.764   |
| <a href="#">AMK58_00840</a> | no KO assigned   (GenBank) hypothetical protein                                                                       | Hypothetical                          | 202.003  | 252.480  | 229.836  | 828.761  | 548.885  | 800.583  |
| <a href="#">AMK58_00845</a> | <a href="#">K09181 acetyltransferase</a>   (GenBank) GCN5 family acetyltransferase                                    | Acetyltransferase                     | 28.769   | 34.215   | 42.875   | 56.539   | 33.886   | 42.608   |
| <a href="#">AMK58_00850</a> | <a href="#">K00016 L-lactate dehydrogenase [EC:1.1.1.27]</a>   (GenBank) L-lactate dehydrogenase                      | Metabolism: Carbohydrate              | 577.740  | 513.721  | 440.678  | 103.820  | 146.784  | 158.036  |
| <a href="#">AMK58_00855</a> | <a href="#">K01507 inorganic pyrophosphatase [EC:3.6.1.11]</a>   (GenBank) inorganic pyrophosphatase                  | Energy                                | 50.990   | 71.298   | 69.732   | 713.560  | 382.915  | 375.238  |
| <a href="#">AMK58_00860</a> | <a href="#">K13893 microcin C transport system substrate-binding protein</a>   (GenBank) peptide ABC transporter sub  | Membrane Transport                    | 10.355   | 11.104   | 13.885   | 76.380   | 67.450   | 50.349   |
| <a href="#">AMK58_00865</a> | no KO assigned   (GenBank) hypothetical protein                                                                       | Hypothetical                          | 122.067  | 116.606  | 119.837  | 452.658  | 117.501  | 385.582  |
| <a href="#">AMK58_00870</a> | <a href="#">K03688 ubiquinone biosynthesis protein</a>   (GenBank) 2-octaprenylphenol hydroxylase                     | Biosynthesis: Co-Factors and Vitamins | 60.105   | 66.272   | 62.459   | 103.592  | 41.208   | 81.485   |
| <a href="#">AMK58_00875</a> | <a href="#">K03183 demethylmenaquinone methyltransferase / 2-methoxy-6-polyvinyl-1,4-benzoquinol methylase [E</a>     | Biosynthesis: Co-Factors and Vitamins | 21.557   | 38.734   | 40.530   | 518.691  | 43.360   | 133.611  |
| <a href="#">AMK58_00880</a> | no KO assigned   (GenBank) hypothetical protein                                                                       | Hypothetical                          | 17.732   | 19.365   | 23.084   | 272.268  | 28.219   | 103.724  |
| <a href="#">AMK58_00885</a> | no KO assigned   (GenBank) hypothetical protein                                                                       | Hypothetical                          | 27.913   | 30.804   | 33.471   | 108.441  | 46.430   | 49.898   |
| <a href="#">AMK58_00890</a> | <a href="#">K10563 formamidopyrimidine-DNA glycosylase [EC:3.2.2.23 4.2.99.18]</a>   (GenBank) 5-hydroxymethylur      | DNA Repair and Replication            | 46.103   | 82.375   | 57.355   | 154.490  | 61.831   | 104.412  |
| <a href="#">AMK58_00895</a> | no KO assigned   (GenBank) hypothetical protein                                                                       | Hypothetical                          | 732.476  | 743.710  | 755.001  | 478.483  | 210.326  | 350.660  |
| <a href="#">AMK58_00900</a> | <a href="#">K01692 enoyl-CoA hydratase [EC:4.2.1.171]</a>   (GenBank) enoyl-CoA hydratase                             | Metabolism                            | 971.559  | 1224.212 | 904.654  | 22.543   | 788.009  | 117.905  |
| <a href="#">AMK58_00905</a> | <a href="#">K02968 small subunit ribosomal protein S20</a>   (GenBank) 30S ribosomal protein S20                      | Ribosome                              | 510.277  | 579.239  | 583.534  | 1094.910 | 854.624  | 1089.145 |
| <a href="#">AMK58_00910</a> | <a href="#">K02313 chromosomal replication initiator protein</a>   (GenBank) chromosomal replication initiation prot  | DNA Repair and Replication            | 210.333  | 265.933  | 239.850  | 107.074  | 72.319   | 137.776  |
| <a href="#">AMK58_00915</a> | <a href="#">K11069 spermidine/putrescine transport system substrate-binding protein</a>   (GenBank) spermidine/putre  | Membrane Transport                    | 65.033   | 81.830   | 67.699   | 164.147  | 58.527   | 108.586  |
| <a href="#">AMK58_00920</a> | <a href="#">K11072 spermidine/putrescine transport system ATP-binding protein [EC:3.6.3.11]</a>   (GenBank) ABC tran  | Membrane Transport                    | 19.837   | 23.839   | 19.620   | 216.248  | 46.005   | 58.566   |
| <a href="#">AMK58_00925</a> | <a href="#">K1466 copper transport protein</a>   (GenBank) hypothetical protein                                       | Transport: Metal                      | 14.226   | 10.736   | 6.763    | 55.366   | 16.917   | 59.641   |
| <a href="#">AMK58_00930</a> | <a href="#">K09796 periplasmic copper chaperone A</a>   (GenBank) hypothetical protein                                | Chaperone                             | 46.412   | 61.619   | 49.459   | 107.824  | 32.511   | 92.519   |
| <a href="#">AMK58_00935</a> | no KO assigned   (GenBank) hypothetical protein                                                                       | Hypothetical                          | 122.895  | 130.530  | 98.096   | 402.010  | 75.039   | 528.427  |
| <a href="#">AMK58_00940</a> | <a href="#">K11071 spermidine/putrescine transport system permease protein</a>   (GenBank) ABC transporter permease   | Membrane Transport                    | 115.876  | 125.055  | 107.704  | 153.756  | 92.420   | 180.519  |
| <a href="#">AMK58_00945</a> | <a href="#">K11070 spermidine/putrescine transport system permease protein</a>   (GenBank) spermidine/putrescine ABC  | Membrane Transport                    | 207.920  | 272.375  | 181.348  | 63.273   | 134.749  | 65.560   |
| <a href="#">AMK58_00950</a> | no KO assigned   (GenBank) hypothetical protein                                                                       | Hypothetical                          | 91.678   | 98.233   | 80.536   | 168.860  | 232.983  | 271.665  |
| <a href="#">AMK58_00955</a> | <a href="#">K07107 acyl-CoA thioester hydrolase [EC:3.1.2.-1]</a>   (GenBank) thioesterase                            | enzyme                                | 78.103   | 93.672   | 98.279   | 572.901  | 339.743  | 509.925  |
| <a href="#">AMK58_00960</a> | no KO assigned   (GenBank) copper oxidase                                                                             | enzyme                                | 41.042   | 41.378   | 45.283   | 149.930  | 71.314   | 76.511   |
| <a href="#">AMK58_00965</a> | <a href="#">K03215 23S rRNA (uracil1939-C5)-methyltransferase [EC:2.1.1.190]</a>   (GenBank) RNA methyltransferas     | Ribosome                              | 168.681  | 164.132  | 172.296  | 167.101  | 220.787  | 150.191  |
| <a href="#">AMK58_00970</a> | <a href="#">K06969 23S rRNA (cytosine1962-C5)-methyltransferase [EC:2.1.1.191]</a>   (GenBank) SAM-dependent me       | Ribosome                              | 136.998  | 129.833  | 139.495  | 60.099   | 532.553  | 152.293  |
| <a href="#">AMK58_00975</a> | no KO assigned   (GenBank) hypothetical protein                                                                       | Hypothetical                          | 6455.726 | 5252.842 | 5187.507 | 238.239  | 252.964  | 587.989  |
| <a href="#">AMK58_00980</a> | <a href="#">K00404 cytochrome c oxidase cbb3-type subunit I</a>   (GenBank) cytochrome oxidase                        | Energy                                | 981.458  | 1001.681 | 804.141  | 37.378   | 54.092   | 98.695   |
| <a href="#">AMK58_00985</a> | <a href="#">K00405 cytochrome c oxidase cbb3-type subunit II</a>   (GenBank) peptidase S41                            | Energy                                | 270.235  | 268.452  | 251.677  | 9.630    | 22.407   | 21.969   |
| <a href="#">AMK58_00990</a> | <a href="#">K00407 cytochrome c oxidase cbb3-type subunit IV</a>   (GenBank) cytochrome oxidase                       | Energy                                | 6197.253 | 7197.834 | 6072.169 | 1045.198 | 956.013  | 1474.059 |
| <a href="#">AMK58_00995</a> | <a href="#">K00406 cytochrome c oxidase cbb3-type subunit III</a>   (GenBank) cytochrome C oxidase Cbb3               | Energy                                | 149.298  | 158.845  | 149.732  | 291.679  | 235.251  | 400.150  |
| <a href="#">AMK58_01000</a> | no KO assigned   (GenBank) cytochrome c oxidase accessory protein Ccof                                                | Energy                                | 62.180   | 52.803   | 50.867   | 79.417   | 80.794   | 65.055   |

|                             |                                                                                                                       |                                       |          |          |          |          |          |          |
|-----------------------------|-----------------------------------------------------------------------------------------------------------------------|---------------------------------------|----------|----------|----------|----------|----------|----------|
| <a href="#">AMK58_01005</a> | <a href="#">no KO assigned   (GenBank) hypothetical protein.</a>                                                      | Hypothetical                          | 224.853  | 252.141  | 248.218  | 693.538  | 390.652  | 497.836  |
| <a href="#">AMK58_01010</a> | <a href="#">K01533 Cu2+-exporting ATPase [EC:3.6.3.4]   (GenBank) ATPase P.</a>                                       | Energy                                | 131.029  | 131.546  | 121.040  | 35.275   | 80.531   | 62.933   |
| <a href="#">AMK58_01015</a> | <a href="#">K01420 CRP/FNR family transcriptional regulator, anaerobic regulatory protein   (GenBank) Crp/Fnr fa</a>  | Transcription                         | 241.165  | 184.269  | 171.119  | 495.348  | 313.678  | 533.661  |
| <a href="#">AMK58_01020</a> | <a href="#">K00029 malate dehydrogenase (oxaloacetate-decarboxylating)(NADP+) [EC:1.1.1.40]   (GenBank) malic e</a>   | Metabolism: Carbon                    | 3.945    | 3.822    | 6.336    | 176.826  | 17.798   | 68.766   |
| <a href="#">AMK58_01025</a> | <a href="#">K07636 two-component system, OmpR family, phosphate regulon sensor histidine kinase PhoR [EC:2.7.1.]</a>  | Signal Transduction                   | 41.484   | 43.709   | 37.914   | 125.570  | 111.965  | 174.368  |
| <a href="#">AMK58_01030</a> | <a href="#">K02040 phosphate transport system substrate-binding protein   (GenBank) phosphate ABC transporter su</a>  | Signal Transduction                   | 36.722   | 32.584   | 36.644   | 220.631  | 140.861  | 248.477  |
| <a href="#">AMK58_01035</a> | <a href="#">K02037 phosphate transport system permease protein   (GenBank) phosphate ABC transporter permease</a>     | Signal Transduction                   | 18.209   | 12.030   | 14.650   | 141.781  | 53.434   | 152.047  |
| <a href="#">AMK58_01040</a> | <a href="#">K02038 phosphate transport system permease protein   (GenBank) phosphate ABC transporter permease</a>     | Signal Transduction                   | 13.580   | 10.285   | 11.639   | 104.281  | 48.697   | 139.761  |
| <a href="#">AMK58_01045</a> | <a href="#">K02036 phosphate transport system ATP-binding protein [EC:3.6.3.27]   (GenBank) phosphate ABC trans</a>   | Signal Transduction                   | 16.853   | 19.431   | 14.197   | 166.543  | 62.646   | 138.589  |
| <a href="#">AMK58_01050</a> | <a href="#">K02039 phosphate transport system protein   (GenBank) PhoU family transcriptional regulator.</a>          | Signal Transduction                   | 37.210   | 44.462   | 45.585   | 211.455  | 99.094   | 192.557  |
| <a href="#">AMK58_01055</a> | <a href="#">K07657 two-component system, OmpR family, phosphate regulon response regulator PhoB   (GenBank) tv</a>    | Starvation                            | 27.478   | 31.807   | 31.025   | 47.390   | 50.576   | 94.434   |
| <a href="#">AMK58_01060</a> | <a href="#">no KO assigned   (GenBank) hypothetical protein.</a>                                                      | Hypothetical                          | 57.655   | 45.044   | 55.662   | 130.105  | 96.212   | 135.299  |
| <a href="#">AMK58_01065</a> | <a href="#">no KO assigned   (GenBank) hypothetical protein.</a>                                                      | Hypothetical                          | 351.614  | 376.541  | 372.954  | 524.697  | 336.815  | 251.197  |
| <a href="#">AMK58_01070</a> | <a href="#">K21029 molybdopterin-synthase adenylyltransferase [EC:2.7.7.80]   (GenBank) adenylyltransferase.</a>      | Genetic Information Processing        | 1172.078 | 1244.098 | 1344.951 | 190.553  | 467.098  | 287.860  |
| <a href="#">AMK58_01075</a> | <a href="#">no KO assigned   (GenBank) hypothetical protein.</a>                                                      | Hypothetical                          | 447.068  | 268.700  | 313.639  | 264.525  | 234.522  | 268.177  |
| <a href="#">AMK58_01080</a> | <a href="#">K01738 cysteine synthase A [EC:2.5.1.47]   (GenBank) cysteine synthase.</a>                               | Metabolism                            | 46.034   | 27.879   | 27.101   | 31.930   | 45.364   | 43.621   |
| <a href="#">AMK58_01085</a> | <a href="#">no KO assigned   (GenBank) Rrf2 family transcriptional regulator.</a>                                     | Transcription                         | 26.817   | 19.036   | 20.196   | 152.938  | 42.678   | 56.627   |
| <a href="#">AMK58_01090</a> | <a href="#">K01520 dUTP pyrophosphatase [EC:3.6.1.23]   (GenBank) deoxyuridine 5'-triphosphate nucleotidohydroly</a>  | Metabolism: Nucleotide                | 97.594   | 78.912   | 94.653   | 672.007  | 358.791  | 390.789  |
| <a href="#">AMK58_01095</a> | <a href="#">K13038 phosphopantothene/cysteine decarboxylase / phosphopantothenate-cysteine ligase [EC:4.1.1.36]</a>   | Biosynthesis: Co-Factors and Vitamins | 130.322  | 138.111  | 138.839  | 165.412  | 62.363   | 239.723  |
| <a href="#">AMK58_01100</a> | <a href="#">no KO assigned   (GenBank) AAA family ATPase.</a>                                                         | Energy                                | 66.562   | 93.628   | 99.017   | 33.408   | 114.311  | 32.501   |
| <a href="#">AMK58_01105</a> | <a href="#">K03704 cold shock protein (beta-ribbon, CspA family)   (GenBank) cold-shock protein.</a>                  | Stress Response                       | 906.331  | 1136.702 | 1190.111 | 3174.982 | 1430.923 | 2406.848 |
| <a href="#">AMK58_01110</a> | <a href="#">no KO assigned   (GenBank) hypothetical protein.</a>                                                      | Hypothetical                          | 16.453   | 16.132   | 18.074   | 50.975   | 20.355   | 15.657   |
| <a href="#">AMK58_01115</a> | <a href="#">K11709 manganese/zinc/iron transport system permease protein   (GenBank) zinc ABC transporter permea</a>  | Transport: Metal                      | 64.401   | 70.357   | 69.515   | 216.412  | 104.242  | 57.670   |
| <a href="#">AMK58_01120</a> | <a href="#">K11708 manganese/zinc/iron transport system permease protein   (GenBank) manganese ABC transpor</a>       | Transport: Metal                      | 48.691   | 50.383   | 62.141   | 169.448  | 192.291  | 105.474  |
| <a href="#">AMK58_01125</a> | <a href="#">K11710 manganese/zinc/iron transport system ATP-binding protein   (GenBank) manganese ABC transpor</a>    | Transport: Metal                      | 142.806  | 172.228  | 157.990  | 227.535  | 938.860  | 187.939  |
| <a href="#">AMK58_01130</a> | <a href="#">K11707 manganese/zinc/iron transport system substrate-binding protein   (GenBank) manganese transpor.</a> | Transport: Metal                      | 29.478   | 40.816   | 43.305   | 128.969  | 47.498   | 78.366   |
| <a href="#">AMK58_01135</a> | <a href="#">K09134 adenosyl-fluoride synthase [EC:2.5.1.63]   (GenBank) hypothetical protein.</a>                     | Transferase                           | 16.273   | 15.556   | 21.198   | 224.968  | 53.047   | 66.245   |
| <a href="#">AMK58_01140</a> | <a href="#">no KO assigned   (GenBank) hypothetical protein.</a>                                                      | Hypothetical                          | 91.337   | 76.143   | 105.309  | 354.858  | 351.659  | 212.721  |
| <a href="#">AMK58_01145</a> | <a href="#">no KO assigned   (GenBank) haloacid dehalogenase.</a>                                                     | enzyme                                | 106.352  | 97.275   | 107.049  | 33.644   | 87.419   | 83.038   |
| <a href="#">AMK58_01150</a> | <a href="#">no KO assigned   (GenBank) pseudogene.</a>                                                                | Pseudogene                            | 1197.833 | 1546.373 | 1129.189 | 268.868  | 593.366  | 561.847  |
| <a href="#">AMK58_01155</a> | <a href="#">K03711 Fur family transcriptional regulator, ferric uptake regulator   (GenBank) Fur family transcri</a>  | Transcription                         | 40.915   | 39.909   | 50.017   | 341.150  | 307.539  | 437.723  |
| <a href="#">AMK58_01160</a> | <a href="#">no KO assigned   (GenBank) transglutaminase.</a>                                                          | enzyme                                | 69.920   | 64.503   | 78.579   | 251.371  | 162.532  | 117.514  |
| <a href="#">AMK58_01165</a> | <a href="#">no KO assigned   (GenBank) histidine kinase.</a>                                                          | Signal Transduction                   | 206.760  | 169.631  | 182.802  | 176.448  | 1080.653 | 295.437  |
| <a href="#">AMK58_01170</a> | <a href="#">K04079 molecular chaperone HtpG   (GenBank) heat-shock protein Hsp90.</a>                                 | Chaperone                             | 74.567   | 94.151   | 119.504  | 207.924  | 95.553   | 124.388  |
| <a href="#">AMK58_01175</a> | <a href="#">no KO assigned   (GenBank) hypothetical protein.</a>                                                      | Hypothetical                          | 46.315   | 64.506   | 70.516   | 359.881  | 259.715  | 195.264  |
| <a href="#">AMK58_01180</a> | <a href="#">K17675 ATP-dependent RNA helicase SUPV3L/SUV3 [EC:3.6.4.13]   (GenBank) disulfide oxidoreduct</a>         | Hydrolase                             | 11.944   | 18.415   | 14.149   | 35.869   | 16.294   | 25.991   |
| <a href="#">AMK58_01185</a> | <a href="#">K04762 ribosome-associated heat shock protein Hsp15   (GenBank) RNA-binding protein S4.</a>               | Stress Response                       | 186.864  | 165.150  | 164.005  | 173.294  | 294.247  | 316.047  |
| <a href="#">AMK58_01190</a> | <a href="#">no KO assigned   (GenBank) hypothetical protein.</a>                                                      | Hypothetical                          | 166.561  | 187.756  | 175.981  | 40.768   | 84.408   | 142.024  |
| <a href="#">AMK58_01195</a> | <a href="#">no KO assigned   (GenBank) hypothetical protein.</a>                                                      | Hypothetical                          | 18.627   | 23.606   | 19.857   | 183.357  | 41.558   | 61.238   |
| <a href="#">AMK58_01200</a> | <a href="#">no KO assigned   (GenBank) SAM-dependent methyltransferase.</a>                                           | Methyltransferase                     | 34.846   | 48.224   | 48.294   | 586.243  | 87.852   | 247.358  |
| <a href="#">AMK58_01205</a> | <a href="#">no KO assigned   (GenBank) MES transporter.</a>                                                           | Transport: MFS                        | 20.893   | 20.702   | 24.613   | 153.585  | 62.319   | 92.991   |
| <a href="#">AMK58_01210</a> | <a href="#">no KO assigned   (GenBank) transcriptional regulator.</a>                                                 | Transcription                         | 66.958   | 82.199   | 74.130   | 46.865   | 82.628   | 86.146   |
| <a href="#">AMK58_01215</a> | <a href="#">K05524 ferredoxin   (GenBank) ferredoxin.</a>                                                             | Ferredoxin                            | 2140.442 | 2120.105 | 2122.613 | 218.683  | 5126.177 | 688.452  |
| <a href="#">AMK58_01220</a> | <a href="#">K07736 CarD family transcriptional regulator   (GenBank) CarD family transcriptional regulator.</a>       | Transcription                         | 341.716  | 365.287  | 373.390  | 606.012  | 1204.466 | 522.581  |
| <a href="#">AMK58_01225</a> | <a href="#">K01259 proline iminopeptidase [EC:3.4.11.51]   (GenBank) proline iminopeptidase.</a>                      | Metabolism: Amino Acid                | 4.201    | 6.846    | 8.958    | 148.031  | 88.296   | 79.451   |
| <a href="#">AMK58_01230</a> | <a href="#">no KO assigned   (GenBank) nuclease.</a>                                                                  | DNA Repair and Replication            | 35.151   | 39.754   | 41.536   | 514.461  | 347.631  | 287.448  |
| <a href="#">AMK58_01235</a> | <a href="#">no KO assigned   (GenBank) peptidase.</a>                                                                 | Peptidase                             | 66.769   | 75.442   | 80.277   | 249.194  | 288.143  | 272.906  |
| <a href="#">AMK58_01240</a> | <a href="#">K01768 adenylate cyclase [EC:4.6.1.1]   (GenBank) guanylate cyclase.</a>                                  | cyclin nucleotide                     | 223.197  | 208.505  | 247.617  | 97.525   | 841.585  | 149.579  |
| <a href="#">AMK58_01245</a> | <a href="#">K03089 RNA polymerase sigma-32 factor   (GenBank) RNA polymerase subunit sigma-70.</a>                    | Transcription                         | 31.107   | 24.032   | 31.234   | 213.015  | 167.140  | 207.009  |
| <a href="#">AMK58_01250</a> | <a href="#">no KO assigned   (GenBank) hypothetical protein.</a>                                                      | Hypothetical                          | 445.573  | 401.569  | 390.501  | 13.515   | 340.233  | 59.162   |
| <a href="#">AMK58_01255</a> | <a href="#">K02916 large subunit ribosomal protein L35   (GenBank) 50S ribosomal protein L35.</a>                     | Ribosome                              | 2547.389 | 2400.389 | 2012.577 | 151.696  | 2368.428 | 404.953  |
| <a href="#">AMK58_01260</a> | <a href="#">K02887 large subunit ribosomal protein L20   (GenBank) rplT; 50S ribosomal protein L20.</a>               | Ribosome                              | 486.252  | 400.568  | 391.157  | 382.794  | 369.866  | 548.975  |
| <a href="#">AMK58_01265</a> | <a href="#">K01889 phenylalanyl-tRNA synthetase alpha chain [EC:6.1.1.20]   (GenBank) phenylalanine--tRNA ligase</a>  | tRNA synthesis/modification           | 202.812  | 188.289  | 208.033  | 345.936  | 205.287  | 301.383  |
| <a href="#">AMK58_01270</a> | <a href="#">K01890 phenylalanyl-tRNA synthetase beta chain [EC:6.1.1.20]   (GenBank) phenylalanine--tRNA ligase.</a>  | tRNA synthesis/modification           | 27.629   | 38.325   | 38.853   | 55.551   | 21.575   | 32.739   |
| <a href="#">AMK58_01275</a> | <a href="#">no KO assigned   (GenBank) regulator.</a>                                                                 | Signal Transduction                   | 501.115  | 592.750  | 562.804  | 817.687  | 492.960  | 783.705  |
| <a href="#">AMK58_01280</a> | <a href="#">no KO assigned   (GenBank) phosphodiesterase.</a>                                                         | enzyme                                | 18.005   | 28.260   | 21.617   | 118.752  | 20.152   | 55.675   |
| <a href="#">AMK58_01285</a> | <a href="#">no KO assigned   (GenBank) hypothetical protein.</a>                                                      | Hypothetical                          | 23.710   | 15.070   | 26.741   | 260.173  | 36.717   | 85.956   |
| <a href="#">AMK58_01290</a> | <a href="#">no KO assigned   (GenBank) LvsR family transcriptional regulator.</a>                                     | Transcription                         | 129.010  | 112.794  | 104.973  | 127.183  | 47.210   | 123.433  |
| <a href="#">AMK58_01295</a> | <a href="#">K06077 outer membrane lipoprotein SlyB   (GenBank) hypothetical protein.</a>                              | Membrane                              | 593.636  | 518.741  | 542.725  | 254.156  | 611.064  | 491.869  |
| <a href="#">AMK58_01300</a> | <a href="#">K03596 GTP-binding protein LepA   (GenBank) GTP-binding protein LepA.</a>                                 | cyclic nucleotide                     | 28.875   | 29.287   | 27.710   | 194.749  | 31.702   | 132.320  |
| <a href="#">AMK58_01305</a> | <a href="#">no KO assigned   (GenBank) hypothetical protein.</a>                                                      | Hypothetical                          | 102.872  | 113.694  | 121.850  | 236.937  | 34.307   | 170.664  |
| <a href="#">AMK58_01310</a> | <a href="#">K00703 starch synthase [EC:2.4.1.21]   (GenBank) glycogen synthase.</a>                                   | Metabolism: Carbohydrate              | 323.767  | 305.678  | 294.063  | 113.497  | 66.344   | 169.657  |
| <a href="#">AMK58_01315</a> | <a href="#">K00975 glucose-1-phosphate adenylyltransferase [EC:2.7.7.27]   (GenBank) glcC; glucose-1-phosphate a</a>  | Metabolism: Carbohydrate              | 19.037   | 14.217   | 18.824   | 276.303  | 41.834   | 224.451  |
| <a href="#">AMK58_01320</a> | <a href="#">K03320 ammonium transporter, Amt family   (GenBank) ammonia channel protein.</a>                          | Transport: Inorganic                  | 27.488   | 30.758   | 31.555   | 259.842  | 61.278   | 108.434  |
| <a href="#">AMK58_01325</a> | <a href="#">no KO assigned   (GenBank) methyltransferase.</a>                                                         | Methyltransferase                     | 63.909   | 66.556   | 73.401   | 137.969  | 110.061  | 142.534  |
| <a href="#">AMK58_01330</a> | <a href="#">K13652 AraC family transcriptional regulator   (GenBank) transcriptional regulator.</a>                   | Transcription                         | 248.118  | 266.589  | 286.716  | 239.662  | 250.942  | 237.717  |
| <a href="#">AMK58_01335</a> | <a href="#">no KO assigned   (GenBank) L-asparaginase II.</a>                                                         | Biosynthesis: Amino Acid              | 39.039   | 29.565   | 34.295   | 116.668  | 119.159  | 97.484   |

|                             |                                                                                                                       |                                       |          |          |          |          |          |          |
|-----------------------------|-----------------------------------------------------------------------------------------------------------------------|---------------------------------------|----------|----------|----------|----------|----------|----------|
| <a href="#">AMK58_01340</a> | <a href="#">no KO assigned   (GenBank) rRNA methyltransferase.</a>                                                    | Methyltransferase                     | 107.208  | 131.070  | 123.581  | 205.435  | 326.158  | 223.580  |
| <a href="#">AMK58_01345</a> | <a href="#">K07167 putative transcriptional regulator   (GenBank) hypothetical protein.</a>                           | Transcription                         | 81.245   | 95.816   | 81.941   | 253.548  | 315.966  | 86.449   |
| <a href="#">AMK58_01350</a> | <a href="#">K03088 RNA polymerase sigma-70 factor. ECF subfamily   (GenBank) RNA polymerase subunit sigma</a>         | Transcription                         | 214.824  | 204.700  | 214.449  | 216.248  | 153.814  | 176.396  |
| <a href="#">AMK58_01355</a> | <a href="#">no KO assigned   (GenBank) hypothetical protein.</a>                                                      | Hypothetical                          | 357.428  | 436.065  | 394.956  | 274.911  | 1046.035 | 482.521  |
| <a href="#">AMK58_01360</a> | <a href="#">K06941 23S rRNA (adenine2503-C2)-methyltransferase [EC:2.1.1.192]   (GenBank) 23S rRNA (adenine)</a>      | Ribosome                              | 21.110   | 19.784   | 19.974   | 16.357   | 52.692   | 16.984   |
| <a href="#">AMK58_01365</a> | <a href="#">no KO assigned   (GenBank) hypothetical protein.</a>                                                      | Hypothetical                          | 84.803   | 88.512   | 132.605  | 253.886  | 269.315  | 257.225  |
| <a href="#">AMK58_01370</a> | <a href="#">no KO assigned   (GenBank) hypothetical protein.</a>                                                      | Hypothetical                          | 3198.004 | 2652.304 | 2456.240 | 547.377  | 1032.476 | 854.617  |
| <a href="#">AMK58_01375</a> | <a href="#">K01940 argininosuccinate synthase [EC:6.3.4.5]   (GenBank) argininosuccinate synthase</a>                 | Biosynthesis: Amino Acid              | 38.399   | 45.649   | 49.177   | 248.396  | 67.496   | 249.791  |
| <a href="#">AMK58_01380</a> | <a href="#">K03406 methyl-accepting chemotaxis protein   (GenBank) hypothetical protein.</a>                          | Chemotaxis                            | 33.619   | 22.214   | 32.186   | 54.685   | 17.240   | 61.630   |
| <a href="#">AMK58_01385</a> | <a href="#">K07032 uncharacterized protein   (GenBank) glyoxalase.</a>                                                | enzyme                                | 127.476  | 144.671  | 109.826  | 170.388  | 77.902   | 219.636  |
| <a href="#">AMK58_01390</a> | <a href="#">no KO assigned   (GenBank) rhodanese.</a>                                                                 | enzyme                                | 7.890    | 7.252    | 15.003   | 166.657  | 165.768  | 197.527  |
| <a href="#">AMK58_01395</a> | <a href="#">no KO assigned   (GenBank) hypothetical protein.</a>                                                      | Hypothetical                          | 62.992   | 71.684   | 67.671   | 641.803  | 234.485  | 277.893  |
| <a href="#">AMK58_01400</a> | <a href="#">no KO assigned   (GenBank) hypothetical protein.</a>                                                      | Hypothetical                          | 40.637   | 42.404   | 50.679   | 308.153  | 134.529  | 122.464  |
| <a href="#">AMK58_01405</a> | <a href="#">K02200 cytochrome c-type biogenesis protein CcmH   (GenBank) cytochrome C biogenesis protein</a>          | Energy                                | 15.542   | 15.975   | 16.684   | 59.323   | 45.834   | 43.079   |
| <a href="#">AMK58_01410</a> | <a href="#">K02200 cytochrome c-type biogenesis protein CcmH   (GenBank) cytochrome C biogenesis protein CcmH</a>     | Energy                                | 90.373   | 87.276   | 84.279   | 156.216  | 304.749  | 175.177  |
| <a href="#">AMK58_01415</a> | <a href="#">K02199 cytochrome c biogenesis protein CcmG, thiol:disulfide interchange protein DsbE   (GenBank) di</a>  | Energy                                | 275.067  | 255.936  | 282.331  | 781.029  | 1356.877 | 561.976  |
| <a href="#">AMK58_01420</a> | <a href="#">K02198 cytochrome c-type biogenesis protein CcmF   (GenBank) cytochrome C biogenesis protein CcmF</a>     | Energy                                | 23.644   | 23.603   | 26.410   | 25.077   | 93.803   | 29.138   |
| <a href="#">AMK58_01425</a> | <a href="#">K02197 cytochrome c-type biogenesis protein CcmE   (GenBank) cytochrome C biogenesis protein CcmE</a>     | Energy                                | 5.576    | 1.586    | 5.049    | 24.897   | 50.736   | 38.900   |
| <a href="#">AMK58_01430</a> | <a href="#">K02196 heme exporter protein D   (GenBank) cytochrome C biogenesis protein CcmD</a>                       | Energy                                | 514.706  | 442.601  | 558.248  | 596.903  | 3102.179 | 736.674  |
| <a href="#">AMK58_01435</a> | <a href="#">K02195 heme exporter protein C   (GenBank) heme transporter HemC</a>                                      | Membrane Transport                    | 32.623   | 42.196   | 46.048   | 347.573  | 148.946  | 178.696  |
| <a href="#">AMK58_01440</a> | <a href="#">no KO assigned   (GenBank) LysR family transcriptional regulator</a>                                      | Transcription                         | 5.399    | 4.032    | 7.700    | 88.777   | 35.351   | 47.686   |
| <a href="#">AMK58_01445</a> | <a href="#">no KO assigned   (GenBank) hypothetical protein.</a>                                                      | Hypothetical                          | 44.705   | 44.514   | 51.951   | 728.589  | 264.509  | 434.109  |
| <a href="#">AMK58_01450</a> | <a href="#">K01104 protein-tyrosine phosphatase [EC:3.1.3.48]   (GenBank) phosphotyrosine protein phosphatase</a>     | Signal Transduction                   | 57.983   | 41.204   | 56.831   | 432.496  | 414.022  | 291.333  |
| <a href="#">AMK58_01455</a> | <a href="#">K12410 NAD-dependent deacetylase [EC:3.5.1.-]   (GenBank) NAD-dependent deaclyase</a>                     | Energy                                | 21.833   | 20.752   | 23.590   | 196.750  | 160.449  | 45.859   |
| <a href="#">AMK58_01460</a> | <a href="#">no KO assigned   (GenBank) uracil-DNA glycosylase</a>                                                     | DNA Repair and Replication            | 44.999   | 60.280   | 49.885   | 83.255   | 246.329  | 97.862   |
| <a href="#">AMK58_01465</a> | <a href="#">no KO assigned   (GenBank) acetylglutamate kinase.</a>                                                    | Signal Transduction                   | 174.886  | 193.943  | 176.849  | 108.907  | 245.559  | 155.117  |
| <a href="#">AMK58_01470</a> | <a href="#">K01724 4a-hydroxytetrahydrobiopterin dehydratase [EC:4.2.1.96]   (GenBank) pterin-4-alpha-carbinolam</a>  | Biosynthesis                          | 131.064  | 159.950  | 139.055  | 551.325  | 262.754  | 203.419  |
| <a href="#">AMK58_01475</a> | <a href="#">K03813 molybdenum transport protein [EC:2.4.2.-]   (GenBank) pyrophosphorylase.</a>                       | Transport                             | 65.521   | 59.089   | 53.977   | 233.093  | 132.800  | 187.252  |
| <a href="#">AMK58_01480</a> | <a href="#">K03284 magnesium transporter   (GenBank) magnesium transporter.</a>                                       | Transport: Metal                      | 95.759   | 93.525   | 95.467   | 176.275  | 104.476  | 74.620   |
| <a href="#">AMK58_01485</a> | <a href="#">K01491 methylenetetrahydrofolate dehydrogenase (NADP+) / methylenetetrahydrofolate cyclohydrolase [E</a>  | Energy                                | 34.098   | 54.112   | 27.735   | 84.751   | 28.895   | 71.018   |
| <a href="#">AMK58_01490</a> | <a href="#">K09131 uncharacterized protein   (GenBank) hypothetical protein.</a>                                      | Hypothetical                          | 251.566  | 239.109  | 220.645  | 112.629  | 108.875  | 198.655  |
| <a href="#">AMK58_01495</a> | <a href="#">K02221 YggT family protein   (GenBank) hypothetical protein.</a>                                          | Secretion System                      | 21.666   | 22.843   | 31.102   | 109.262  | 104.099  | 157.571  |
| <a href="#">AMK58_01500</a> | <a href="#">K14218 tRNA Ala   (GenBank) tRNA-Ala</a>                                                                  | tRNA synthesis/modification           | 393.493  | 485.410  | 524.094  | 2341.025 | 2807.817 | 1948.470 |
| <a href="#">AMK58_01505</a> | <a href="#">no KO assigned   (GenBank) hypothetical protein.</a>                                                      | Hypothetical                          | 69.869   | 82.928   | 84.398   | 119.843  | 46.676   | 130.440  |
| <a href="#">AMK58_01510</a> | <a href="#">K10019 octopine/nopaline transport system permease protein   (GenBank) ABC transporter permease</a>       | Membrane Transport                    | 407.443  | 363.774  | 389.903  | 208.491  | 114.792  | 166.615  |
| <a href="#">AMK58_01515</a> | <a href="#">K10020 octopine/nopaline transport system permease protein   (GenBank) ABC transporter permease</a>       | Membrane Transport                    | 2106.530 | 2133.129 | 2110.677 | 260.188  | 289.174  | 281.072  |
| <a href="#">AMK58_01520</a> | <a href="#">no KO assigned   (GenBank) amino acid ABC transporter substrate-binding protein.</a>                      | Membrane Transport                    | 198.017  | 228.109  | 203.460  | 146.434  | 75.553   | 157.366  |
| <a href="#">AMK58_01525</a> | <a href="#">no KO assigned   (GenBank) amino acid transporter.</a>                                                    | Transport: Amino Acid                 | 70.064   | 75.294   | 85.590   | 429.883  | 97.306   | 274.622  |
| <a href="#">AMK58_01530</a> | <a href="#">K07085 putative transport protein   (GenBank) transporter.</a>                                            | Transport                             | 28.324   | 39.017   | 30.698   | 257.040  | 23.507   | 193.512  |
| <a href="#">AMK58_01535</a> | <a href="#">K07085 putative transport protein   (GenBank) transporter.</a>                                            | Transport                             | 14.918   | 13.348   | 16.034   | 85.534   | 26.490   | 47.581   |
| <a href="#">AMK58_01540</a> | <a href="#">K02193 heme exporter protein A [EC:3.6.3.41]   (GenBank) cytochrome C biogenesis protein CcmA</a>         | Energy                                | 26.321   | 34.595   | 33.368   | 191.332  | 46.942   | 146.439  |
| <a href="#">AMK58_01545</a> | <a href="#">K02194 heme exporter protein B   (GenBank) heme transporter.</a>                                          | Membrane Transport                    | 801.348  | 800.470  | 659.082  | 50.166   | 2626.435 | 228.754  |
| <a href="#">AMK58_01550</a> | <a href="#">K03671 thioredoxin 1   (GenBank) thioredoxin.</a>                                                         | Chaperone                             | 258.966  | 301.398  | 310.182  | 1763.521 | 395.678  | 1194.425 |
| <a href="#">AMK58_01555</a> | <a href="#">K16898 ATP-dependent helicase/nuclease subunit A [EC:3.1.-.-3.6.4.12]   (GenBank) DNA helicase UvrF</a>   | DNA Repair and Replication            | 29.057   | 30.218   | 22.453   | 30.138   | 35.915   | 54.178   |
| <a href="#">AMK58_01560</a> | <a href="#">no KO assigned   (GenBank) hypothetical protein.</a>                                                      | Hypothetical                          | 104.160  | 111.695  | 132.189  | 724.868  | 409.614  | 273.107  |
| <a href="#">AMK58_01565</a> | <a href="#">K16899 ATP-dependent helicase/nuclease subunit B [EC:3.1.-.-3.6.4.12]   (GenBank) double-strand bre.</a>  | DNA Repair and Replication            | 13.819   | 12.627   | 13.564   | 54.225   | 29.558   | 50.237   |
| <a href="#">AMK58_01570</a> | <a href="#">K00992 MurNAc alpha-1-phosphate uridylyltransferase [EC:2.7.7.-]   (GenBank) mannose-1-phosphate g</a>    | Metabolism: Carbohydrate              | 28.872   | 31.531   | 30.551   | 311.480  | 88.286   | 168.405  |
| <a href="#">AMK58_01575</a> | <a href="#">K07102 anomeric MurNAc/GlcNAc kinase [EC:2.7.1.-]   (GenBank) aminoglycoside phosphotransferase</a>       | Signal Transduction                   | 5.612    | 4.280    | 7.947    | 58.860   | 24.024   | 25.244   |
| <a href="#">AMK58_01580</a> | <a href="#">K06925 tRNA threonylcarbamoyladenosine biosynthesis protein TsaE   (GenBank) tRNA threonylcarbam</a>      | tRNA synthesis/modification           | 33.794   | 31.955   | 41.378   | 273.241  | 96.194   | 236.939  |
| <a href="#">AMK58_01585</a> | <a href="#">no KO assigned   (GenBank) hypothetical protein.</a>                                                      | Hypothetical                          | 348.161  | 285.267  | 315.091  | 496.837  | 394.223  | 519.708  |
| <a href="#">AMK58_01590</a> | <a href="#">K00384 thioredoxin reductase (NADPH) [EC:1.8.1.9]   (GenBank) ferredoxin-NADP reductase</a>               | Energy                                | 39.530   | 43.133   | 58.066   | 201.028  | 131.038  | 73.091   |
| <a href="#">AMK58_01595</a> | <a href="#">no KO assigned   (GenBank) hypothetical protein.</a>                                                      | Hypothetical                          | 58.953   | 82.056   | 74.536   | 247.949  | 97.142   | 191.623  |
| <a href="#">AMK58_01600</a> | <a href="#">no KO assigned   (GenBank) two-component system response regulator.</a>                                   | Signal Transduction                   | 33.187   | 34.873   | 49.631   | 390.721  | 76.482   | 169.332  |
| <a href="#">AMK58_01605</a> | <a href="#">no KO assigned   (GenBank) histidine kinase.</a>                                                          | Signal Transduction                   | 5.703    | 9.959    | 12.263   | 226.355  | 158.184  | 134.154  |
| <a href="#">AMK58_01610</a> | <a href="#">K03885 NADH dehydrogenase [EC:1.6.99.3]   (GenBank) pyridine nucleotide-disulfide oxidoreductase</a>      | Energy                                | 106.407  | 129.057  | 151.632  | 266.976  | 181.857  | 162.634  |
| <a href="#">AMK58_01615</a> | <a href="#">no KO assigned   (GenBank) histidine kinase.</a>                                                          | Signal Transduction                   | 32.337   | 43.068   | 46.289   | 324.236  | 61.741   | 182.644  |
| <a href="#">AMK58_01620</a> | <a href="#">no KO assigned   (GenBank) hypothetical protein.</a>                                                      | Hypothetical                          | 8.653    | 10.180   | 13.723   | 82.078   | 15.284   | 53.378   |
| <a href="#">AMK58_01625</a> | <a href="#">K09969 general L-amino acid transport system substrate-binding protein   (GenBank) hypothetical prot.</a> | Transport: Amino Acid                 | 297.063  | 274.058  | 276.894  | 164.845  | 378.285  | 171.063  |
| <a href="#">AMK58_01630</a> | <a href="#">K01696 tryptophan synthase beta chain [EC:4.2.1.20]   (GenBank) tryptophan synthase subunit beta.</a>     | Biosynthesis: Amino Acid              | 123.560  | 122.341  | 117.765  | 111.852  | 108.048  | 46.364   |
| <a href="#">AMK58_01635</a> | <a href="#">K01695 tryptophan synthase alpha chain [EC:4.2.1.20]   (GenBank) tryptophan synthase subunit a</a>        | Biosynthesis: Amino Acid              | 400.609  | 357.871  | 364.745  | 161.237  | 250.539  | 124.744  |
| <a href="#">AMK58_01640</a> | <a href="#">K01963 acetyl-CoA carboxylase carboxyl transferase subunit beta [EC:6.4.1.2]   (GenBank) acetyl-CoA</a>   | Metabolism                            | 99.847   | 95.858   | 121.221  | 230.962  | 147.330  | 113.071  |
| <a href="#">AMK58_01645</a> | <a href="#">K11754 dihydrofolate synthase / folylpolyglutamate synthase [EC:6.3.2.12.6.3.2.17]   (GenBank) bifun.</a> | Biosynthesis: Co-Factors and Vitamins | 104.671  | 134.202  | 121.322  | 305.519  | 187.534  | 180.029  |
| <a href="#">AMK58_01650</a> | <a href="#">no KO assigned   (GenBank) hypothetical protein.</a>                                                      | Hypothetical                          | 2.553    | 2.119    | 2.023    | 7.126    | 5.342    | 15.324   |
| <a href="#">AMK58_01655</a> | <a href="#">K14219 tRNA Arg   (GenBank) tRNA-Arg.</a>                                                                 | tRNA synthesis/modification           | 617.953  | 648.202  | 895.536  | 1636.603 | 1385.676 | 1418.680 |
| <a href="#">AMK58_01660</a> | <a href="#">K13938 dihydromonapterin reductase / dihydrofolate reductase [EC:1.5.1.-1.5.1.3]   (GenBank) hypoth</a>   | Biosynthesis: Co-Factors and Vitamins | 180.865  | 178.606  | 175.126  | 114.131  | 65.340   | 222.229  |
| <a href="#">AMK58_01665</a> | <a href="#">no KO assigned   (GenBank) oxidoreductase.</a>                                                            | Oxidoreductase                        | 422.575  | 490.747  | 462.959  | 709.484  | 312.481  | 469.111  |
| <a href="#">AMK58_01670</a> | <a href="#">no KO assigned   (GenBank) hypothetical protein.</a>                                                      | Hypothetical                          | 75.701   | 65.547   | 66.165   | 77.366   | 39.198   | 71.722   |



|                             |                                                                                                                    |                                       |         |          |         |          |          |          |
|-----------------------------|--------------------------------------------------------------------------------------------------------------------|---------------------------------------|---------|----------|---------|----------|----------|----------|
| <a href="#">AMK58_01675</a> | <a href="#">K01495 GTP cyclohydrolase I [EC:3.5.4.16] (GenBank) hypothetical protein</a>                           | Biosynthesis: Co-Factors and Vitamins | 12.985  | 18.870   | 17.018  | 214.838  | 75.147   | 43.769   |
| <a href="#">AMK58_01680</a> | <a href="#">no KO assigned (GenBank) hypothetical protein</a>                                                      | Hypothetical                          | 48.341  | 49.460   | 54.537  | 125.947  | 118.812  | 138.041  |
| <a href="#">AMK58_01685</a> | <a href="#">K03976 Cys-tRNA(Pro)/Cys-tRNA(Cys) deacylase [EC:3.1.1.-] (GenBank) cys-tRNA(Pro)/cys-tRNA(Cys)</a>    | tRNA synthesis/modification           | 9.024   | 17.972   | 14.777  | 221.620  | 143.701  | 80.193   |
| <a href="#">AMK58_01690</a> | <a href="#">no KO assigned (GenBank) hypothetical protein</a>                                                      | Hypothetical                          | 120.869 | 108.257  | 113.357 | 119.709  | 1107.956 | 194.754  |
| <a href="#">AMK58_01695</a> | <a href="#">K01495 GTP cyclohydrolase I [EC:3.5.4.16] (GenBank) GTP cyclohydrolase</a>                             | Biosynthesis: Co-Factors and Vitamins | 145.435 | 171.607  | 155.566 | 99.357   | 141.815  | 165.707  |
| <a href="#">AMK58_01700</a> | <a href="#">K06195 ApaG protein (GenBank) Co2+/Mg2+ efflux protein ApaG</a>                                        | Inorganic Efflux                      | 83.181  | 119.639  | 97.544  | 322.308  | 253.487  | 365.948  |
| <a href="#">AMK58_01705</a> | <a href="#">no KO assigned (GenBank) GCN5 family acetyltransferase</a>                                             | Acetyltransferase                     | 31.186  | 29.592   | 19.884  | 20.642   | 83.306   | 43.547   |
| <a href="#">AMK58_01710</a> | <a href="#">K14225 tRNA Gly (GenBank) tRNA-Gly</a>                                                                 | tRNA synthesis/modification           | 178.340 | 107.526  | 199.125 | 425.190  | 99.311   | 2674.749 |
| <a href="#">AMK58_01715</a> | <a href="#">no KO assigned (GenBank) hypothetical protein</a>                                                      | Hypothetical                          | 38.524  | 31.053   | 41.571  | 233.859  | 134.031  | 706.505  |
| <a href="#">AMK58_01720</a> | <a href="#">K07260 D-alanyl-D-alanine carboxypeptidase [EC:3.4.16.4] (GenBank) hypothetical protein</a>            | Cell Wall                             | 13.766  | 16.822   | 28.110  | 128.030  | 115.697  | 243.686  |
| <a href="#">AMK58_01725</a> | <a href="#">no KO assigned (GenBank) hypothetical protein</a>                                                      | Hypothetical                          | 28.412  | 46.295   | 41.136  | 1059.831 | 257.307  | 494.136  |
| <a href="#">AMK58_01730</a> | <a href="#">K03654 ATP-dependent DNA helicase RecQ [EC:3.6.4.12] (GenBank) hypothetical protein</a>                | DNA Repair and Replication            | 4.158   | 6.763    | 6.040   | 22.900   | 13.763   | 41.043   |
| <a href="#">AMK58_01735</a> | <a href="#">no KO assigned (GenBank) hypothetical protein</a>                                                      | Hypothetical                          | 81.080  | 58.650   | 94.492  | 215.923  | 14.713   | 394.236  |
| <a href="#">AMK58_01740</a> | <a href="#">no KO assigned (GenBank) hypothetical protein</a>                                                      | Hypothetical                          | 18.444  | 13.092   | 19.621  | 53.328   | 31.201   | 170.691  |
| <a href="#">AMK58_01745</a> | <a href="#">no KO assigned (GenBank) hypothetical protein</a>                                                      | Hypothetical                          | 56.031  | 72.570   | 90.158  | 674.462  | 511.340  | 1452.239 |
| <a href="#">AMK58_01750</a> | <a href="#">no KO assigned (GenBank) hypothetical protein</a>                                                      | Hypothetical                          | 8.760   | 11.215   | 13.802  | 26.738   | 19.482   | 78.212   |
| <a href="#">AMK58_01755</a> | <a href="#">no KO assigned (GenBank) hypothetical protein</a>                                                      | Hypothetical                          | 2.703   | 7.535    | 4.797   | 26.790   | 37.264   | 85.205   |
| <a href="#">AMK58_01760</a> | <a href="#">no KO assigned (GenBank) hypothetical protein</a>                                                      | Hypothetical                          | 3.174   | 8.128    | 8.192   | 211.388  | 81.044   | 245.143  |
| <a href="#">AMK58_01765</a> | <a href="#">no KO assigned (GenBank) hypothetical protein</a>                                                      | Hypothetical                          | 5.765   | 4.306    | 5.824   | 116.812  | 67.237   | 201.484  |
| <a href="#">AMK58_01770</a> | <a href="#">no KO assigned (GenBank) hypothetical protein</a>                                                      | Hypothetical                          | 0.992   | 3.953    | 4.403   | 206.056  | 42.018   | 57.362   |
| <a href="#">AMK58_01775</a> | <a href="#">no KO assigned (GenBank) hypothetical protein</a>                                                      | Hypothetical                          | 2.328   | 4.637    | 2.583   | 145.032  | 30.098   | 143.216  |
| <a href="#">AMK58_01780</a> | <a href="#">no KO assigned (GenBank) hypothetical protein</a>                                                      | Hypothetical                          | 496.407 | 568.351  | 884.223 | 844.139  | 196.363  | 1050.523 |
| <a href="#">AMK58_01785</a> | <a href="#">no KO assigned (GenBank) hypothetical protein</a>                                                      | Hypothetical                          | 109.168 | 122.133  | 145.777 | 109.959  | 30.796   | 145.003  |
| <a href="#">AMK58_01790</a> | <a href="#">no KO assigned (GenBank) hypothetical protein</a>                                                      | Hypothetical                          | 479.497 | 546.444  | 670.603 | 302.318  | 70.553   | 378.473  |
| <a href="#">AMK58_01795</a> | <a href="#">K04043 molecular chaperone DnaK (GenBank) hypothetical protein</a>                                     | Chaperone                             | 216.926 | 236.095  | 337.116 | 269.443  | 54.088   | 364.397  |
| <a href="#">AMK58_01800</a> | <a href="#">no KO assigned (GenBank) hypothetical protein</a>                                                      | Hypothetical                          | 123.514 | 141.456  | 139.575 | 108.893  | 28.590   | 169.452  |
| <a href="#">AMK58_01805</a> | <a href="#">no KO assigned (GenBank) hypothetical protein</a>                                                      | Hypothetical                          | 91.932  | 99.838   | 93.534  | 30.953   | 19.594   | 163.058  |
| <a href="#">AMK58_01810</a> | <a href="#">no KO assigned (GenBank) hypothetical protein</a>                                                      | Hypothetical                          | 87.955  | 82.557   | 83.420  | 116.498  | 104.905  | 301.216  |
| <a href="#">AMK58_01815</a> | <a href="#">K12132 eukaryotic-like serine/threonine-protein kinase [EC:2.7.1.1] (GenBank) serine/threonine pr</a>  | Signal Transduction                   | 26.270  | 23.765   | 27.499  | 74.488   | 24.871   | 95.057   |
| <a href="#">AMK58_01820</a> | <a href="#">no KO assigned (GenBank) hypothetical protein</a>                                                      | Hypothetical                          | 370.543 | 359.804  | 337.404 | 169.189  | 197.441  | 545.836  |
| <a href="#">AMK58_01825</a> | <a href="#">K06915 uncharacterized protein (GenBank) nucleoside triphosphate hydrolase</a>                         | Hydrolase                             | 41.938  | 45.907   | 40.012  | 55.505   | 36.970   | 135.310  |
| <a href="#">AMK58_01830</a> | <a href="#">no KO assigned (GenBank) hypothetical protein</a>                                                      | Hypothetical                          | 29.715  | 25.182   | 34.165  | 111.370  | 25.347   | 117.057  |
| <a href="#">AMK58_01835</a> | <a href="#">no KO assigned (GenBank) hypothetical protein</a>                                                      | Hypothetical                          | 332.623 | 366.535  | 342.124 | 655.476  | 195.582  | 1063.752 |
| <a href="#">AMK58_01840</a> | <a href="#">no KO assigned (GenBank) hypothetical protein</a>                                                      | Hypothetical                          | 2.856   | 4.437    | 4.807   | 45.989   | 7.063    | 17.560   |
| <a href="#">AMK58_01845</a> | <a href="#">no KO assigned (GenBank) hypothetical protein</a>                                                      | Hypothetical                          | 14.711  | 9.334    | 17.577  | 174.742  | 29.706   | 64.827   |
| <a href="#">AMK58_01850</a> | <a href="#">no KO assigned (GenBank) hypothetical protein</a>                                                      | Hypothetical                          | 43.205  | 37.656   | 39.340  | 58.692   | 44.450   | 117.266  |
| <a href="#">AMK58_01855</a> | <a href="#">no KO assigned (GenBank) hypothetical protein</a>                                                      | Hypothetical                          | 523.850 | 429.191  | 457.790 | 795.792  | 1194.898 | 1533.978 |
| <a href="#">AMK58_01860</a> | <a href="#">K03427 type I restriction enzyme M protein [EC:2.1.1.72] (GenBank) restriction endonuclease subuni</a> | DNA Repair and Replication            | 9.196   | 8.749    | 9.858   | 31.229   | 89.807   | 36.120   |
| <a href="#">AMK58_01865</a> | <a href="#">no KO assigned (GenBank) hypothetical protein</a>                                                      | Hypothetical                          | 279.966 | 301.873  | 315.444 | 565.735  | 1755.995 | 873.700  |
| <a href="#">AMK58_01870</a> | <a href="#">no KO assigned (GenBank) hypothetical protein</a>                                                      | Hypothetical                          | 27.342  | 25.051   | 24.336  | 45.871   | 62.941   | 193.596  |
| <a href="#">AMK58_01875</a> | <a href="#">no KO assigned (GenBank) hypothetical protein</a>                                                      | Hypothetical                          | 5.942   | 10.355   | 11.535  | 204.474  | 159.610  | 491.897  |
| <a href="#">AMK58_01880</a> | <a href="#">no KO assigned (GenBank) hypothetical protein</a>                                                      | Hypothetical                          | 11.707  | 11.248   | 11.803  | 93.860   | 82.198   | 58.590   |
| <a href="#">AMK58_01885</a> | <a href="#">no KO assigned (GenBank) hypothetical protein</a>                                                      | Hypothetical                          | 21.405  | 22.534   | 22.055  | 31.578   | 8.373    | 22.996   |
| <a href="#">AMK58_01890</a> | <a href="#">no KO assigned (GenBank) hypothetical protein</a>                                                      | Hypothetical                          | 48.855  | 25.381   | 39.383  | 302.320  | 104.457  | 363.892  |
| <a href="#">AMK58_01895</a> | <a href="#">no KO assigned (GenBank) hypothetical protein</a>                                                      | Hypothetical                          | 254.787 | 199.714  | 207.757 | 543.350  | 131.511  | 398.047  |
| <a href="#">AMK58_01900</a> | <a href="#">K02049 NiT/TauT family transport system ATP-binding protein (GenBank) sulfonate ABC transporter A</a>  | Transport: NiT/TauT                   | 187.980 | 182.443  | 176.107 | 180.069  | 41.570   | 210.595  |
| <a href="#">AMK58_01905</a> | <a href="#">K02050 NiT/TauT family transport system permease protein (GenBank) ABC transporter permease</a>        | Transport: NiT/TauT                   | 894.480 | 890.213  | 773.296 | 182.125  | 147.305  | 325.283  |
| <a href="#">AMK58_01910</a> | <a href="#">K02051 NiT/TauT family transport system substrate-binding protein (GenBank) hypothetical protein</a>   | Transport: NiT/TauT                   | 19.336  | 20.933   | 20.852  | 34.419   | 100.356  | 52.585   |
| <a href="#">AMK58_01915</a> | <a href="#">no KO assigned (GenBank) hypothetical protein</a>                                                      | Hypothetical                          | 518.113 | 602.796  | 727.012 | 2453.244 | 1360.932 | 1348.247 |
| <a href="#">AMK58_01920</a> | <a href="#">K20975 two-component system, sensor histidine kinase [EC:2.7.13.3] (GenBank) histidine kinase</a>      | Signal Transduction                   | 1.349   | 1.466    | 1.788   | 7.121    | 4.183    | 17.100   |
| <a href="#">AMK58_01925</a> | <a href="#">no KO assigned (GenBank) hypothetical protein</a>                                                      | Hypothetical                          | 923.609 | 1039.577 | 966.873 | 2431.902 | 667.823  | 1554.598 |
| <a href="#">AMK58_01930</a> | <a href="#">no KO assigned (GenBank) hypothetical protein</a>                                                      | Hypothetical                          | 3.553   | 3.821    | 5.810   | 116.405  | 139.208  | 98.961   |
| <a href="#">AMK58_01935</a> | <a href="#">no KO assigned (GenBank) hypothetical protein</a>                                                      | Hypothetical                          | 1.333   | 2.896    | 4.955   | 199.201  | 101.218  | 109.235  |
| <a href="#">AMK58_01940</a> | <a href="#">K07010 putative glutamine amidotransferase (GenBank) glutamine amidotransferase</a>                    | Peptidase                             | 488.369 | 556.194  | 588.332 | 767.544  | 557.525  | 561.348  |
| <a href="#">AMK58_01945</a> | <a href="#">no KO assigned (GenBank) hypothetical protein</a>                                                      | Hypothetical                          | 8.345   | 10.661   | 13.473  | 82.183   | 798.921  | 43.896   |
| <a href="#">AMK58_01950</a> | <a href="#">no KO assigned (GenBank) hypothetical protein</a>                                                      | Hypothetical                          | 18.695  | 21.275   | 40.348  | 942.904  | 84.058   | 327.178  |
| <a href="#">AMK58_01955</a> | <a href="#">no KO assigned (GenBank) phospholipase</a>                                                             | Membrane                              | 47.033  | 66.468   | 68.065  | 111.310  | 114.902  | 114.902  |
| <a href="#">AMK58_01960</a> | <a href="#">K03406 methyl-accepting chemotaxis protein (GenBank) hypothetical protein</a>                          | Chemotaxis                            | 6.919   | 10.334   | 17.085  | 109.025  | 131.881  | 64.956   |
| <a href="#">AMK58_01965</a> | <a href="#">no KO assigned (GenBank) hypothetical protein</a>                                                      | Hypothetical                          | 0.946   | 0.942    | 2.248   | 51.105   | 22.859   | 27.629   |
| <a href="#">AMK58_01970</a> | <a href="#">no KO assigned (GenBank) hypothetical protein</a>                                                      | Hypothetical                          | 2.306   | 1.378    | 3.289   | 40.469   | 22.034   | 70.570   |
| <a href="#">AMK58_01975</a> | <a href="#">no KO assigned (GenBank) hypothetical protein</a>                                                      | Hypothetical                          | 8.892   | 5.449    | 13.441  | 275.502  | 131.736  | 193.459  |
| <a href="#">AMK58_01980</a> | <a href="#">no KO assigned (GenBank) hypothetical protein</a>                                                      | Hypothetical                          | 1.636   | 5.431    | 3.457   | 73.300   | 27.586   | 20.566   |
| <a href="#">AMK58_01985</a> | <a href="#">no KO assigned (GenBank) hypothetical protein</a>                                                      | Hypothetical                          | 64.125  | 50.903   | 83.141  | 458.325  | 420.881  | 258.220  |
| <a href="#">AMK58_01990</a> | <a href="#">no KO assigned (GenBank) hypothetical protein</a>                                                      | Hypothetical                          | 98.615  | 119.511  | 102.773 | 378.669  | 680.466  | 246.668  |
| <a href="#">AMK58_01995</a> | <a href="#">K04772 serine protease DegO [EC:3.4.21.-] (GenBank) peptidase</a>                                      | Peptidase                             | 43.327  | 54.531   | 56.148  | 220.520  | 41.780   | 113.799  |
| <a href="#">AMK58_02000</a> | <a href="#">no KO assigned (GenBank) hypothetical protein</a>                                                      | Hypothetical                          | 35.902  | 47.336   | 56.265  | 261.686  | 34.649   | 128.111  |
| <a href="#">AMK58_02005</a> | <a href="#">no KO assigned (GenBank) hypothetical protein</a>                                                      | Hypothetical                          | 311.566 | 307.497  | 341.474 | 185.337  | 184.873  | 91.665   |

|                             |                                                                                                                      |                                     |           |           |           |          |          |          |
|-----------------------------|----------------------------------------------------------------------------------------------------------------------|-------------------------------------|-----------|-----------|-----------|----------|----------|----------|
| <a href="#">AMK58_02010</a> | <a href="#">K02498 HemY protein   (GenBank) heme biosynthesis protein HemY</a>                                       | Membrane Transport                  | 198.099   | 192.382   | 192.028   | 178.174  | 165.049  | 85.516   |
| <a href="#">AMK58_02015</a> | <a href="#">no KO assigned   (GenBank) hypothetical protein</a>                                                      | Hypothetical                        | 69.213    | 90.611    | 77.785    | 84.536   | 66.457   | 76.634   |
| <a href="#">AMK58_02020</a> | <a href="#">K01719 uroporphyrinogen-III synthase [EC:4.2.1.75]   (GenBank) uroporphyrinogen III synthase</a>         | Metabolism: Co-Factors and Vitamins | 93.208    | 126.300   | 139.483   | 239.846  | 82.808   | 100.686  |
| <a href="#">AMK58_02025</a> | <a href="#">K01749 hydroxymethylbilane synthase [EC:2.5.1.611]   (GenBank) porphobilinogen deaminase</a>             | Metabolism: Co-Factors and Vitamins | 19.200    | 17.947    | 27.321    | 156.237  | 27.013   | 120.142  |
| <a href="#">AMK58_02030</a> | <a href="#">no KO assigned   (GenBank) hypothetical protein</a>                                                      | Hypothetical                        | 28.137    | 39.054    | 38.238    | 318.661  | 50.955   | 90.791   |
| <a href="#">AMK58_02035</a> | <a href="#">K01409 N6-L-threonylcarbamoyladenine synthase [EC:2.3.1.2341]   (GenBank) tRNA threonylcarbamoyl-a</a>   | tRNA synthesis/modification         | 14.993    | 22.900    | 17.900    | 107.218  | 21.795   | 55.194   |
| <a href="#">AMK58_02040</a> | <a href="#">no KO assigned   (GenBank) GNAT family acetyltransferase</a>                                             | Acetyltransferase                   | 31.821    | 27.821    | 40.587    | 448.090  | 96.545   | 150.173  |
| <a href="#">AMK58_02045</a> | <a href="#">K00057 glycerol-3-phosphate dehydrogenase (NAD(P)+) [EC:1.1.1.941]   (GenBank) glycerol-3-phosphate</a>  | Energy                              | 21.676    | 25.757    | 34.160    | 70.906   | 20.192   | 44.530   |
| <a href="#">AMK58_02050</a> | <a href="#">K09780 uncharacterized protein   (GenBank) hypothetical protein</a>                                      | Hypothetical                        | 299.501   | 413.709   | 306.984   | 136.578  | 159.492  | 286.780  |
| <a href="#">AMK58_02055</a> | <a href="#">no KO assigned   (GenBank) ubiquinol-cytochrome C reductase</a>                                          | Energy                              | 179.273   | 338.964   | 354.533   | 191.567  | 91.386   | 201.760  |
| <a href="#">AMK58_02060</a> | <a href="#">no KO assigned   (GenBank) hypothetical protein</a>                                                      | Hypothetical                        | 18766.231 | 16561.828 | 17241.459 | 652.605  | 6297.956 | 1361.604 |
| <a href="#">AMK58_02065</a> | <a href="#">K01895 acetyl-CoA synthetase [EC:6.2.1.1]   (GenBank) acetyl-coenzyme A synthetase</a>                   | Metabolism: Carbon                  | 2.433     | 1.863     | 3.796     | 47.294   | 31.902   | 23.888   |
| <a href="#">AMK58_02070</a> | <a href="#">no KO assigned   (GenBank) hypothetical protein</a>                                                      | Hypothetical                        | 20.688    | 24.314    | 27.087    | 409.781  | 213.861  | 154.725  |
| <a href="#">AMK58_02075</a> | <a href="#">no KO assigned   (GenBank) hypothetical protein</a>                                                      | Hypothetical                        | 47.892    | 59.476    | 49.885    | 157.140  | 117.040  | 184.122  |
| <a href="#">AMK58_02080</a> | <a href="#">no KO assigned   (GenBank) hypothetical protein</a>                                                      | Hypothetical                        | 532.607   | 507.810   | 493.035   | 1098.441 | 3331.534 | 1313.782 |
| <a href="#">AMK58_02085</a> | <a href="#">K03799 heat shock protein HtpX [EC:3.4.24.-1]   (GenBank) heat-shock protein HtpX</a>                    | Stress Response                     | 133.848   | 100.669   | 110.338   | 64.802   | 321.675  | 208.537  |
| <a href="#">AMK58_02090</a> | <a href="#">no KO assigned   (GenBank) exopolyphosphatase</a>                                                        | Membrane                            | 8.565     | 8.528     | 12.092    | 180.438  | 38.509   | 45.846   |
| <a href="#">AMK58_02095</a> | <a href="#">no KO assigned   (GenBank) hypothetical protein</a>                                                      | Hypothetical                        | 76.127    | 88.883    | 86.226    | 372.285  | 218.639  | 147.198  |
| <a href="#">AMK58_02100</a> | <a href="#">K03500 16S rRNA (cytosine967-C5)-methyltransferase [EC:2.1.1.176]   (GenBank) MFS transporter</a>        | Ribosome                            | 74.189    | 109.300   | 93.179    | 203.440  | 149.837  | 139.293  |
| <a href="#">AMK58_02105</a> | <a href="#">no KO assigned   (GenBank) hypothetical protein</a>                                                      | Hypothetical                        | 178.060   | 187.731   | 181.488   | 239.109  | 124.979  | 174.008  |
| <a href="#">AMK58_02110</a> | <a href="#">K00602 phosphoribosylaminoimidazolecarboxamide formyltransferase / IMP cyclohydrolase [EC:2.1.2.3.3</a>  | Metabolism: Nucleotide              | 64.950    | 69.857    | 60.966    | 47.089   | 34.002   | 42.739   |
| <a href="#">AMK58_02115</a> | <a href="#">no KO assigned   (GenBank) hypothetical protein</a>                                                      | Hypothetical                        | 293.606   | 301.398   | 297.870   | 1223.828 | 362.348  | 848.104  |
| <a href="#">AMK58_02120</a> | <a href="#">K06902 MFS transporter_UMF1 family   (GenBank) MFS transporter</a>                                       | Transport: MFS                      | 76.376    | 113.111   | 85.527    | 194.969  | 48.063   | 124.687  |
| <a href="#">AMK58_02125</a> | <a href="#">no KO assigned   (GenBank) hypothetical protein</a>                                                      | Hypothetical                        | 35.978    | 39.252    | 33.019    | 44.423   | 36.749   | 96.459   |
| <a href="#">AMK58_02130</a> | <a href="#">no KO assigned   (GenBank) hypothetical protein</a>                                                      | Hypothetical                        | 620.774   | 688.457   | 770.994   | 1168.734 | 366.497  | 1202.467 |
| <a href="#">AMK58_02135</a> | <a href="#">no KO assigned   (GenBank) hypothetical protein</a>                                                      | Hypothetical                        | 3398.166  | 3256.206  | 3768.297  | 558.971  | 281.592  | 472.288  |
| <a href="#">AMK58_02140</a> | <a href="#">K15371 glutamate dehydrogenase [EC:1.4.1.21]   (GenBank) NAD-glutamate dehydrogenase</a>                 | Energy                              | 3.216     | 4.617     | 4.432     | 69.656   | 12.385   | 50.067   |
| <a href="#">AMK58_02145</a> | <a href="#">no KO assigned   (GenBank) transcriptional regulator</a>                                                 | Transcription                       | 81.152    | 74.591    | 78.126    | 133.599  | 57.929   | 145.251  |
| <a href="#">AMK58_02150</a> | <a href="#">no KO assigned   (GenBank) 3-phosphoglycerate dehydrogenase</a>                                          | Membrane                            | 20.677    | 17.861    | 17.410    | 319.199  | 93.109   | 357.715  |
| <a href="#">AMK58_02155</a> | <a href="#">K03406 methyl-accepting chemotaxis protein   (GenBank) chemotaxis protein</a>                            | Chemotaxis                          | 13.405    | 14.058    | 11.729    | 119.490  | 45.044   | 111.278  |
| <a href="#">AMK58_02160</a> | <a href="#">no KO assigned   (GenBank) 3-phosphoglycerate dehydrogenase</a>                                          | Membrane                            | 9.228     | 13.232    | 14.507    | 200.260  | 69.568   | 239.828  |
| <a href="#">AMK58_02165</a> | <a href="#">K07088 uncharacterized protein   (GenBank) transporter</a>                                               | Transport                           | 15.362    | 17.112    | 20.796    | 153.989  | 48.876   | 163.334  |
| <a href="#">AMK58_02170</a> | <a href="#">no KO assigned   (GenBank) dimethylmenaquinone methyltransferase</a>                                     | Methyltransferase                   | 1002.171  | 3324.448  | 1567.519  | 150.704  | 608.003  | 155.820  |
| <a href="#">AMK58_02175</a> | <a href="#">K14225 tRNA Gly   (GenBank) tRNA-Gly</a>                                                                 | tRNA synthesis/modification         | 511.743   | 453.303   | 658.480   | 1288.837 | 391.948  | 2071.750 |
| <a href="#">AMK58_02180</a> | <a href="#">K19055 Ala-tRNA(Pro) deacylase [EC:3.1.1.-1]   (GenBank) DNA-binding protein</a>                         | tRNA synthesis/modification         | 542.808   | 540.922   | 577.219   | 399.315  | 863.364  | 419.378  |
| <a href="#">AMK58_02185</a> | <a href="#">K05838 putative thioredoxin   (GenBank) thioredoxin</a>                                                  | Chaperone                           | 127.801   | 136.482   | 118.860   | 193.297  | 523.117  | 134.394  |
| <a href="#">AMK58_02190</a> | <a href="#">K07157 uncharacterized protein   (GenBank) peptidase S16</a>                                             | Peptidase                           | 119.671   | 115.318   | 124.796   | 53.827   | 235.895  | 58.087   |
| <a href="#">AMK58_02195</a> | <a href="#">K09791 uncharacterized protein   (GenBank) hypothetical protein</a>                                      | Hypothetical                        | 566.037   | 604.322   | 562.966   | 143.709  | 1725.570 | 380.864  |
| <a href="#">AMK58_02200</a> | <a href="#">no KO assigned   (GenBank) hypothetical protein</a>                                                      | Hypothetical                        | 68.759    | 60.726    | 77.883    | 93.707   | 211.364  | 115.042  |
| <a href="#">AMK58_02205</a> | <a href="#">no KO assigned   (GenBank) hypothetical protein</a>                                                      | Hypothetical                        | 86.392    | 99.838    | 87.838    | 199.776  | 323.576  | 235.357  |
| <a href="#">AMK58_02210</a> | <a href="#">K06995 uncharacterized protein   (GenBank) cupin</a>                                                     | No COG                              | 134.980   | 127.651   | 138.336   | 298.022  | 528.743  | 472.036  |
| <a href="#">AMK58_02215</a> | <a href="#">K07025 putative hydrolase of the HAD superfamily   (GenBank) haloacid dehalogenase</a>                   | Hydrolase                           | 282.332   | 490.660   | 316.535   | 104.583  | 1701.066 | 170.284  |
| <a href="#">AMK58_02220</a> | <a href="#">no KO assigned   (GenBank) hypothetical protein</a>                                                      | Hypothetical                        | 755.124   | 552.035   | 496.324   | 845.785  | 509.753  | 1283.715 |
| <a href="#">AMK58_02225</a> | <a href="#">K01581 ornithine decarboxylase [EC:4.1.1.17]   (GenBank) ornithine decarboxylase</a>                     | Metabolism: Amino Acid              | 7.561     | 8.907     | 10.024    | 103.987  | 10.773   | 39.398   |
| <a href="#">AMK58_02230</a> | <a href="#">K07507 putative Mg2+ transporter-C (MgtC) family protein   (GenBank) hypothetical protein</a>            | Transport: Ion                      | 115.966   | 109.877   | 127.991   | 411.624  | 73.215   | 335.151  |
| <a href="#">AMK58_02235</a> | <a href="#">K07552 MFS transporter_DHA1 family_bicyclomycin/chloramphenicol resistance protein   (GenBank) MF</a>    | Transport: MFS                      | 11.546    | 17.702    | 10.492    | 115.925  | 12.748   | 106.869  |
| <a href="#">AMK58_02240</a> | <a href="#">K07043 uncharacterized protein   (GenBank) hypothetical protein</a>                                      | Hypothetical                        | 231.947   | 299.381   | 302.134   | 248.605  | 204.899  | 202.837  |
| <a href="#">AMK58_02245</a> | <a href="#">no KO assigned   (GenBank) hypothetical protein</a>                                                      | Hypothetical                        | 9.528     | 9.594     | 11.400    | 77.436   | 26.834   | 57.971   |
| <a href="#">AMK58_02250</a> | <a href="#">no KO assigned   (GenBank) hypothetical protein</a>                                                      | Hypothetical                        | 3082.536  | 3745.651  | 3890.888  | 833.766  | 503.701  | 951.389  |
| <a href="#">AMK58_02255</a> | <a href="#">K05813 sn-glycerol 3-phosphate transport system substrate-binding protein   (GenBank) glycerol-3-pho</a> | Membrane Transport                  | 236.811   | 240.037   | 268.869   | 56.001   | 38.346   | 146.672  |
| <a href="#">AMK58_02260</a> | <a href="#">K05814 sn-glycerol 3-phosphate transport system permease protein   (GenBank) glycerol-3-phosphate tr</a> | Membrane Transport                  | 187.563   | 198.616   | 208.385   | 57.177   | 39.675   | 136.880  |
| <a href="#">AMK58_02265</a> | <a href="#">K05815 sn-glycerol 3-phosphate transport system permease protein   (GenBank) glycerol-3-phosphate tr</a> | Membrane Transport                  | 111.604   | 134.051   | 151.552   | 290.217  | 24.893   | 172.390  |
| <a href="#">AMK58_02270</a> | <a href="#">K05816 sn-glycerol 3-phosphate transport system ATP-binding protein [EC:3.6.3.20]   (GenBank) glycer</a> | Membrane Transport                  | 80.942    | 90.251    | 91.645    | 108.275  | 23.316   | 112.583  |
| <a href="#">AMK58_02275</a> | <a href="#">K00799 glutathione S-transferase [EC:2.5.1.181]   (GenBank) glutathione S-transferase</a>                | Metabolism: Amino Acid              | 149.246   | 153.982   | 146.083   | 59.682   | 89.157   | 214.350  |
| <a href="#">AMK58_02280</a> | <a href="#">K06991 uncharacterized protein   (GenBank) glyoxalase</a>                                                | enzyme                              | 50.935    | 46.561    | 48.165    | 111.479  | 128.585  | 588.706  |
| <a href="#">AMK58_02285</a> | <a href="#">no KO assigned   (GenBank) hypothetical protein</a>                                                      | Hypothetical                        | 10.762    | 17.223    | 16.811    | 182.009  | 47.093   | 124.744  |
| <a href="#">AMK58_02290</a> | <a href="#">no KO assigned   (GenBank) hypothetical protein</a>                                                      | Hypothetical                        | 231.941   | 199.987   | 267.708   | 454.438  | 586.268  | 372.911  |
| <a href="#">AMK58_02295</a> | <a href="#">K11927 ATP-dependent RNA helicase RhIE [EC:3.6.4.13]   (GenBank) DEAD/DEAH box helicase</a>              | Genetic Information Processing      | 86.362    | 155.041   | 90.685    | 43.114   | 23.771   | 84.691   |
| <a href="#">AMK58_02300</a> | <a href="#">K03711 Fur family transcriptional regulator_ferric uptake regulator   (GenBank) Fur family transcr</a>   | Transcription                       | 68.378    | 113.648   | 80.901    | 109.157  | 19.070   | 68.411   |
| <a href="#">AMK58_02305</a> | <a href="#">no KO assigned   (GenBank) hypothetical protein</a>                                                      | Hypothetical                        | 209.325   | 318.276   | 271.169   | 1181.434 | 322.995  | 1093.257 |
| <a href="#">AMK58_02310</a> | <a href="#">no KO assigned   (GenBank) hypothetical protein</a>                                                      | Hypothetical                        | 5.778     | 8.631     | 11.246    | 416.047  | 53.280   | 232.493  |
| <a href="#">AMK58_02315</a> | <a href="#">no KO assigned   (GenBank) histidine kinase</a>                                                          | Signal Transduction                 | 9.773     | 10.993    | 9.797     | 86.981   | 23.578   | 165.769  |
| <a href="#">AMK58_02320</a> | <a href="#">no KO assigned   (GenBank) PAS domain-containing sensor histidine kinase</a>                             | Signal Transduction                 | 20.930    | 17.024    | 15.911    | 23.179   | 4.193    | 46.215   |
| <a href="#">AMK58_02325</a> | <a href="#">no KO assigned   (GenBank) anti-anti-sigma factor</a>                                                    | Transcription                       | 38.380    | 59.098    | 55.302    | 420.835  | 60.041   | 250.956  |
| <a href="#">AMK58_02330</a> | <a href="#">no KO assigned   (GenBank) hypothetical protein</a>                                                      | Hypothetical                        | 19.174    | 12.010    | 22.200    | 234.890  | 55.967   | 256.227  |
| <a href="#">AMK58_02335</a> | <a href="#">K07315 phosphoserine phosphatase RsbU/P [EC:3.1.3.31]   (GenBank) transcriptional regulator</a>          | Transcription                       | 306.974   | 288.593   | 319.211   | 90.757   | 673.062  | 171.604  |
| <a href="#">AMK58_02340</a> | <a href="#">no KO assigned   (GenBank) hypothetical protein</a>                                                      | Hypothetical                        | 28.801    | 43.840    | 53.722    | 197.818  | 371.576  | 163.301  |

|                             |                                                                                                                       |                              |          |          |          |          |          |          |
|-----------------------------|-----------------------------------------------------------------------------------------------------------------------|------------------------------|----------|----------|----------|----------|----------|----------|
| <a href="#">AMK58_02345</a> | <a href="#">no KO assigned   (GenBank) hypothetical protein.</a>                                                      | Hypothetical                 | 50.590   | 50.941   | 74.584   | 223.862  | 364.513  | 188.961  |
| <a href="#">AMK58_02350</a> | <a href="#">no KO assigned   (GenBank) twitching motility protein PilT.</a>                                           | Motility                     | 82.259   | 130.542  | 102.165  | 377.745  | 277.676  | 379.000  |
| <a href="#">AMK58_02355</a> | <a href="#">K07315 phosphoserine phosphatase RsbU/P [EC:3.1.3.31]   (GenBank) transcriptional regulator.</a>          | Transcription                | 22.376   | 27.469   | 25.550   | 172.451  | 43.412   | 104.880  |
| <a href="#">AMK58_02360</a> | <a href="#">K07315 phosphoserine phosphatase RsbU/P [EC:3.1.3.31]   (GenBank) regulator.</a>                          | Transcription                | 28.363   | 29.760   | 36.247   | 141.487  | 40.565   | 87.289   |
| <a href="#">AMK58_02365</a> | <a href="#">no KO assigned   (GenBank) hypothetical protein.</a>                                                      | Hypothetical                 | 112.380  | 99.976   | 82.362   | 75.159   | 42.045   | 83.670   |
| <a href="#">AMK58_02370</a> | <a href="#">no KO assigned   (GenBank) anti-anti-sigma factor.</a>                                                    | Transcription                | 216.431  | 217.479  | 258.830  | 409.175  | 234.827  | 555.111  |
| <a href="#">AMK58_02375</a> | <a href="#">K03406 methyl-accepting chemotaxis protein   (GenBank) chemotaxis protein.</a>                            | Chemotaxis                   | 30.502   | 39.670   | 34.526   | 178.307  | 34.402   | 129.490  |
| <a href="#">AMK58_02380</a> | <a href="#">K03412 two-component system, chemotaxis family, response regulator CheB [EC:3.1.1.61]   (GenBank) ct</a>  | Chemotaxis                   | 20.463   | 14.943   | 19.565   | 111.627  | 19.296   | 90.659   |
| <a href="#">AMK58_02385</a> | <a href="#">K03411 chemotaxis protein CheD [EC:3.5.1.44]   (GenBank) chemotaxis protein.</a>                          | Chemotaxis                   | 66.813   | 49.608   | 57.651   | 295.659  | 46.884   | 289.179  |
| <a href="#">AMK58_02390</a> | <a href="#">K00575 chemotaxis protein methyltransferase CheR [EC:2.1.1.80]   (GenBank) chemotaxis protein.</a>        | Chemotaxis                   | 132.380  | 149.226  | 149.367  | 595.210  | 82.602   | 408.852  |
| <a href="#">AMK58_02395</a> | <a href="#">K03406 methyl-accepting chemotaxis protein   (GenBank) chemotaxis protein.</a>                            | Chemotaxis                   | 30.186   | 32.355   | 27.448   | 35.831   | 5.929    | 46.462   |
| <a href="#">AMK58_02400</a> | <a href="#">K03408 purine-binding chemotaxis protein CheW   (GenBank) chemotaxis protein CheW.</a>                    | Chemotaxis                   | 387.439  | 379.944  | 404.428  | 802.738  | 185.857  | 730.547  |
| <a href="#">AMK58_02405</a> | <a href="#">K03407 two-component system, chemotaxis family, sensor kinase CheA [EC:2.7.13.31]   (GenBank) chemo</a>   | Chemotaxis                   | 20.558   | 19.393   | 18.621   | 16.813   | 7.054    | 25.785   |
| <a href="#">AMK58_02410</a> | <a href="#">K03413 two-component system, chemotaxis family, response regulator CheY   (GenBank) Fis family trans</a>  | Chemotaxis                   | 65.169   | 79.055   | 77.060   | 220.236  | 49.826   | 92.331   |
| <a href="#">AMK58_02415</a> | <a href="#">no KO assigned   (GenBank) hypothetical protein.</a>                                                      | Hypothetical                 | 288.329  | 329.220  | 379.302  | 1612.502 | 663.018  | 1234.966 |
| <a href="#">AMK58_02420</a> | <a href="#">no KO assigned   (GenBank) histidine kinase.</a>                                                          | Signal Transduction          | 2.040    | 1.815    | 2.888    | 17.207   | 5.268    | 6.237    |
| <a href="#">AMK58_02425</a> | <a href="#">no KO assigned   (GenBank) hypothetical protein.</a>                                                      | Hypothetical                 | 1337.514 | 1465.259 | 1608.221 | 1534.528 | 1138.763 | 1113.101 |
| <a href="#">AMK58_02430</a> | <a href="#">K02342 DNA polymerase III subunit epsilon [EC:2.7.7.7]   (GenBank) exonuclease.</a>                       | DNA Repair and Replication   | 69.914   | 67.487   | 67.101   | 37.168   | 43.947   | 39.915   |
| <a href="#">AMK58_02435</a> | <a href="#">no KO assigned   (GenBank) two-component system response regulator.</a>                                   | Signal Transduction          | 98.137   | 119.692  | 109.874  | 422.772  | 197.776  | 252.809  |
| <a href="#">AMK58_02440</a> | <a href="#">no KO assigned   (GenBank) hypothetical protein.</a>                                                      | Hypothetical                 | 74.407   | 72.141   | 77.677   | 162.040  | 223.398  | 194.076  |
| <a href="#">AMK58_02445</a> | <a href="#">no KO assigned   (GenBank) allantoinase.</a>                                                              | Metabolism: Carbohydrate     | 74.122   | 63.038   | 62.576   | 74.733   | 240.609  | 130.737  |
| <a href="#">AMK58_02450</a> | <a href="#">K06190 intracellular septation protein   (GenBank) septation protein A.</a>                               | Cell Cycle/Shape/Homeostasis | 80.505   | 83.318   | 92.015   | 312.201  | 595.675  | 438.106  |
| <a href="#">AMK58_02455</a> | <a href="#">no KO assigned   (GenBank) hypothetical protein.</a>                                                      | Hypothetical                 | 222.525  | 202.036  | 224.124  | 251.893  | 394.197  | 266.795  |
| <a href="#">AMK58_02460</a> | <a href="#">K01241 AMP nucleosidase [EC:3.2.2.41]   (GenBank) AMP nucleosidase.</a>                                   | Metabolism: Nucleotide       | 38.696   | 41.132   | 42.963   | 212.114  | 74.006   | 119.461  |
| <a href="#">AMK58_02465</a> | <a href="#">K03110 fused signal recognition particle receptor   (GenBank) signal recognition particle-docking pr</a>  | Secretion System             | 101.917  | 115.981  | 102.733  | 337.374  | 338.654  | 205.354  |
| <a href="#">AMK58_02470</a> | <a href="#">K18707 threonylcarbamoyladenosine tRNA methylthiotransferase MtaB [EC:2.8.4.5]   (GenBank) 2-methyl</a>   | tRNA synthesis/modification  | 63.708   | 86.114   | 75.193   | 159.097  | 239.135  | 82.242   |
| <a href="#">AMK58_02475</a> | <a href="#">K01778 diaminiopimelate epimerase [EC:5.1.1.71]   (GenBank) diaminiopimelate epimerase.</a>               | Biosynthesis: Amino Acid     | 0.579    | 1.728    | 4.401    | 88.941   | 76.746   | 77.395   |
| <a href="#">AMK58_02480</a> | <a href="#">no KO assigned   (GenBank) hypothetical protein.</a>                                                      | Hypothetical                 | 32.671   | 45.927   | 43.489   | 269.795  | 89.865   | 224.896  |
| <a href="#">AMK58_02485</a> | <a href="#">no KO assigned   (GenBank) GtrA-like protein.</a>                                                         | Biosynthesis: Polysaccharide | 249.665  | 164.626  | 229.444  | 255.023  | 339.138  | 443.401  |
| <a href="#">AMK58_02490</a> | <a href="#">no KO assigned   (GenBank) glycosyl transferase.</a>                                                      | Transferase                  | 25.972   | 19.016   | 23.726   | 21.163   | 56.097   | 281.087  |
| <a href="#">AMK58_02495</a> | <a href="#">no KO assigned   (GenBank) hypothetical protein.</a>                                                      | Hypothetical                 | 42.439   | 34.636   | 36.112   | 30.665   | 24.061   | 75.329   |
| <a href="#">AMK58_02500</a> | <a href="#">K01704 3-isopropylmalate (R)-2-methylmalate dehydratase small subunit [EC:4.2.1.33 4.2.1.35]   (GenB</a>  | Metabolism                   | 416.046  | 347.494  | 412.133  | 352.463  | 418.509  | 353.319  |
| <a href="#">AMK58_02505</a> | <a href="#">K00052 3-isopropylmalate dehydrogenase [EC:1.1.1.85]   (GenBank) 3-isopropylmalate dehydrogenase.</a>     | Metabolism                   | 3.255    | 2.593    | 8.562    | 130.359  | 486.570  | 96.576   |
| <a href="#">AMK58_02510</a> | <a href="#">no KO assigned   (GenBank) hypothetical protein.</a>                                                      | Hypothetical                 | 16.596   | 29.295   | 32.994   | 322.856  | 481.626  | 251.820  |
| <a href="#">AMK58_02515</a> | <a href="#">no KO assigned   (GenBank) hypothetical protein.</a>                                                      | Hypothetical                 | 94.714   | 85.019   | 98.040   | 411.558  | 196.142  | 324.911  |
| <a href="#">AMK58_02520</a> | <a href="#">K01644 citrate lyase subunit beta / citryl-CoA lyase [EC:4.1.3.34]   (GenBank) malvl-CoA thiolester</a>   | Signal Transduction          | 168.571  | 186.990  | 147.880  | 171.196  | 302.584  | 111.251  |
| <a href="#">AMK58_02525</a> | <a href="#">K00868 pyridoxine kinase [EC:2.7.1.35]   (GenBank) pyridoxamine kinase.</a>                               | Signal Transduction          | 97.591   | 82.333   | 96.133   | 148.058  | 140.361  | 107.184  |
| <a href="#">AMK58_02530</a> | <a href="#">K06966 uncharacterized protein   (GenBank) LOG family protein.</a>                                        | No COG                       | 25.302   | 22.488   | 26.046   | 136.135  | 91.199   | 109.361  |
| <a href="#">AMK58_02535</a> | <a href="#">no KO assigned   (GenBank) hypothetical protein.</a>                                                      | Hypothetical                 | 199.159  | 172.976  | 194.924  | 436.413  | 277.446  | 471.587  |
| <a href="#">AMK58_02540</a> | <a href="#">K06916 cell division protein ZapE   (GenBank) ATPase.</a>                                                 | Cell Cycle/Shape/Homeostasis | 38.576   | 31.940   | 32.791   | 138.736  | 67.870   | 260.407  |
| <a href="#">AMK58_02545</a> | <a href="#">K13069 diguanylate cyclase [EC:2.7.7.65]   (GenBank) diguanylate cyclase.</a>                             | cyclin nucleotide            | 173.099  | 174.639  | 211.261  | 263.212  | 72.960   | 292.098  |
| <a href="#">AMK58_02550</a> | <a href="#">no KO assigned   (GenBank) PAS domain-containing sensor histidine kinase.</a>                             | Signal Transduction          | 678.062  | 538.573  | 538.195  | 42.297   | 124.404  | 68.851   |
| <a href="#">AMK58_02555</a> | <a href="#">K00658 2-oxoglutarate dehydrogenase E2 component (dihydroliipoamide succinyltransferase) [EC:2.3.1.61</a> | Metabolism                   | 2002.562 | 1525.738 | 1594.957 | 286.089  | 517.784  | 424.637  |
| <a href="#">AMK58_02560</a> | <a href="#">K00164 2-oxoglutarate dehydrogenase E1 component [EC:1.2.4.21]   (GenBank) sucA: 2-oxoglutarate dehy</a>  | Metabolism                   | 155.307  | 136.757  | 144.479  | 25.783   | 19.774   | 12.091   |
| <a href="#">AMK58_02565</a> | <a href="#">K01902 succinyl-CoA synthetase alpha subunit [EC:6.2.1.5]   (GenBank) succinate--CoA ligase.</a>          | Metabolism: Carbohydrate     | 2969.926 | 2128.779 | 2218.799 | 146.819  | 334.640  | 199.420  |
| <a href="#">AMK58_02570</a> | <a href="#">K01903 succinyl-CoA synthetase beta subunit [EC:6.2.1.5]   (GenBank) sucC: succinyl-CoA synthetase s</a>  | Metabolism: Carbohydrate     | 2150.923 | 1723.484 | 1703.703 | 79.264   | 360.073  | 174.454  |
| <a href="#">AMK58_02575</a> | <a href="#">K00024 malate dehydrogenase [EC:1.1.1.37]   (GenBank) malate dehydrogenase.</a>                           | Metabolism: Carbon           | 273.886  | 294.866  | 250.078  | 187.125  | 106.459  | 140.656  |
| <a href="#">AMK58_02580</a> | <a href="#">no KO assigned   (GenBank) hypothetical protein.</a>                                                      | Hypothetical                 | 159.290  | 128.028  | 179.640  | 644.916  | 401.856  | 127.173  |
| <a href="#">AMK58_02585</a> | <a href="#">no KO assigned   (GenBank) hypothetical protein.</a>                                                      | Hypothetical                 | 193.720  | 178.192  | 202.722  | 188.953  | 291.328  | 342.468  |
| <a href="#">AMK58_02590</a> | <a href="#">K04566 lysyl-tRNA synthetase, class I [EC:6.1.1.61]   (GenBank) lysK: lysine--tRNA ligase.</a>            | tRNA synthesis/modification  | 3.473    | 3.688    | 4.549    | 28.116   | 15.613   | 55.312   |
| <a href="#">AMK58_02595</a> | <a href="#">K03297 small multidrug resistance pump   (GenBank) ligand-binding protein SH3.</a>                        | Transport                    | 33.258   | 49.117   | 32.333   | 375.430  | 152.475  | 607.434  |
| <a href="#">AMK58_02600</a> | <a href="#">no KO assigned   (GenBank) hypothetical protein.</a>                                                      | Hypothetical                 | 5.701    | 11.653   | 13.980   | 243.781  | 43.341   | 145.102  |
| <a href="#">AMK58_02605</a> | <a href="#">K03814 monofunctional biosynthetic peptidoglycan transglycosylase [EC:2.4.1.-]   (GenBank) monofunct</a>  | Cell Wall                    | 97.812   | 118.980  | 109.757  | 716.026  | 203.446  | 251.013  |
| <a href="#">AMK58_02610</a> | <a href="#">K03722 ATP-dependent DNA helicase DinG [EC:3.6.4.12]   (GenBank) helicase.</a>                            | DNA Repair and Replication   | 37.123   | 19.331   | 26.233   | 91.548   | 20.298   | 82.753   |
| <a href="#">AMK58_02615</a> | <a href="#">K03406 methyl-accepting chemotaxis protein   (GenBank) chemotaxis protein.</a>                            | Chemotaxis                   | 7.063    | 6.459    | 6.236    | 62.461   | 13.204   | 26.664   |
| <a href="#">AMK58_02620</a> | <a href="#">no KO assigned   (GenBank) hypothetical protein.</a>                                                      | Hypothetical                 | 60.285   | 55.759   | 57.559   | 276.392  | 253.474  | 456.096  |
| <a href="#">AMK58_02625</a> | <a href="#">K00651 homoserine O-succinyltransferase [EC:2.3.1.46]   (GenBank) homoserine O-succinyltransferase.</a>   | Metabolism: Amino Acid       | 3.321    | 3.815    | 3.157    | 33.703   | 15.361   | 107.888  |
| <a href="#">AMK58_02630</a> | <a href="#">no KO assigned   (GenBank) hypothetical protein.</a>                                                      | Hypothetical                 | 223.336  | 212.112  | 241.202  | 756.867  | 257.520  | 847.509  |
| <a href="#">AMK58_02635</a> | <a href="#">K03406 methyl-accepting chemotaxis protein   (GenBank) chemotaxis protein.</a>                            | Chemotaxis                   | 78.355   | 92.343   | 75.589   | 96.526   | 67.403   | 143.854  |
| <a href="#">AMK58_02640</a> | <a href="#">K07088 uncharacterized protein   (GenBank) transporter.</a>                                               | Transport                    | 269.098  | 293.005  | 247.603  | 34.559   | 281.374  | 55.780   |
| <a href="#">AMK58_02645</a> | <a href="#">no KO assigned   (GenBank) hypothetical protein.</a>                                                      | Hypothetical                 | 323.165  | 400.078  | 393.678  | 485.356  | 576.632  | 181.018  |
| <a href="#">AMK58_02650</a> | <a href="#">no KO assigned   (GenBank) 2-hydroxy-3-oxopropionate reductase.</a>                                       | Enzyme                       | 58.265   | 71.595   | 67.447   | 96.131   | 142.441  | 104.606  |
| <a href="#">AMK58_02655</a> | <a href="#">K03827 putative acetyltransferase [EC:2.3.1.-]   (GenBank) GNAT family acetyltransferase.</a>             | Acetyltransferase            | 108.139  | 91.192   | 117.333  | 244.665  | 409.734  | 365.836  |
| <a href="#">AMK58_02660</a> | <a href="#">K00133 aspartate-semialdehyde dehydrogenase [EC:1.2.1.11]   (GenBank) aspartate-semialdehyde dehydro</a>  | Biosynthesis: Amino Acid     | 35.135   | 44.678   | 40.404   | 31.801   | 58.840   | 85.413   |
| <a href="#">AMK58_02665</a> | <a href="#">no KO assigned   (GenBank) hypothetical protein.</a>                                                      | Hypothetical                 | 907.602  | 756.235  | 671.963  | 192.903  | 401.063  | 368.279  |
| <a href="#">AMK58_02670</a> | <a href="#">K00241 succinate dehydrogenase / fumarate reductase, cytochrome b subunit   (GenBank) succinate dehy</a>  | Energy                       | 412.586  | 315.309  | 311.411  | 147.631  | 165.406  | 222.236  |
| <a href="#">AMK58_02675</a> | <a href="#">K00242 succinate dehydrogenase / fumarate reductase, membrane anchor subunit   (GenBank) succinate d</a>  | Energy                       | 1802.058 | 1512.471 | 1446.254 | 555.773  | 3993.785 | 843.157  |

|                             |                                                                                                                           |                                |          |          |          |         |         |         |
|-----------------------------|---------------------------------------------------------------------------------------------------------------------------|--------------------------------|----------|----------|----------|---------|---------|---------|
| <a href="#">AMK58_02680</a> | <a href="#">K00239 succinate dehydrogenase / fumarate reductase, flavoprotein subunit [EC:1.3.5.1, 1.3.5.4] (GenBank)</a> | Energy                         | 167.684  | 133.549  | 128.491  | 53.334  | 687.034 | 131.170 |
| <a href="#">AMK58_02685</a> | <a href="#">K00240 succinate dehydrogenase / fumarate reductase, iron-sulfur subunit [EC:1.3.5.1, 1.3.5.4] (GenBank)</a>  | Energy                         | 1.091    | 0.000    | 2.519    | 114.803 | 62.179  | 54.184  |
| <a href="#">AMK58_02690</a> | <a href="#">no KO assigned (GenBank) hypothetical protein</a>                                                             | Hypothetical                   | 1283.749 | 1301.331 | 1306.939 | 933.364 | 473.658 | 669.215 |
| <a href="#">AMK58_02695</a> | <a href="#">K00826 branched-chain amino acid aminotransferase [EC:2.6.1.42] (GenBank) aminotransferase</a>                | Biosynthesis: Amino Acid       | 182.682  | 236.006  | 186.441  | 152.252 | 131.284 | 178.521 |
| <a href="#">AMK58_02700</a> | <a href="#">no KO assigned (GenBank) hypothetical protein</a>                                                             | Hypothetical                   | 33.020   | 36.533   | 38.761   | 54.062  | 46.281  | 75.224  |
| <a href="#">AMK58_02705</a> | <a href="#">no KO assigned (GenBank) hypothetical protein</a>                                                             | Hypothetical                   | 384.466  | 403.979  | 409.648  | 454.310 | 193.396 | 438.902 |
| <a href="#">AMK58_02710</a> | <a href="#">no KO assigned (GenBank) DNA-binding protein</a>                                                              | No COG                         | 1.339    | 2.285    | 2.364    | 117.860 | 21.715  | 105.885 |
| <a href="#">AMK58_02715</a> | <a href="#">no KO assigned (GenBank) hypothetical protein</a>                                                             | Hypothetical                   | 2.316    | 3.953    | 11.323   | 345.642 | 66.187  | 179.141 |
| <a href="#">AMK58_02720</a> | <a href="#">no KO assigned (GenBank) hypothetical protein</a>                                                             | Hypothetical                   | 5.226    | 3.469    | 11.043   | 234.528 | 57.440  | 45.231  |
| <a href="#">AMK58_02725</a> | <a href="#">no KO assigned (GenBank) hypothetical protein</a>                                                             | Hypothetical                   | 20.179   | 31.846   | 33.305   | 632.933 | 129.246 | 353.755 |
| <a href="#">AMK58_02730</a> | <a href="#">no KO assigned (GenBank) pseudogene</a>                                                                       | Pseudogene                     | 12.315   | 10.638   | 13.967   | 23.453  | 31.355  | 97.273  |
| <a href="#">AMK58_02735</a> | <a href="#">no KO assigned (GenBank) hypothetical protein</a>                                                             | Hypothetical                   | 23.147   | 10.638   | 12.415   | 209.888 | 106.740 | 378.635 |
| <a href="#">AMK58_02740</a> | <a href="#">no KO assigned (GenBank) pseudogene</a>                                                                       | Pseudogene                     | 26.906   | 23.442   | 21.851   | 126.145 | 101.440 | 300.425 |
| <a href="#">AMK58_02745</a> | <a href="#">no KO assigned (GenBank) hypothetical protein</a>                                                             | Hypothetical                   | 40.833   | 53.897   | 44.242   | 137.381 | 145.166 | 362.785 |
| <a href="#">AMK58_02750</a> | <a href="#">K01173 endonuclease G, mitochondrial (GenBank) endonuclease</a>                                               | DNA Repair and Replication     | 40.205   | 48.590   | 49.462   | 217.892 | 105.218 | 369.110 |
| <a href="#">AMK58_02755</a> | <a href="#">no KO assigned (GenBank) hypothetical protein</a>                                                             | Hypothetical                   | 215.043  | 291.501  | 257.156  | 152.503 | 132.031 | 549.619 |
| <a href="#">AMK58_02760</a> | <a href="#">no KO assigned (GenBank) hypothetical protein</a>                                                             | Hypothetical                   | 87.490   | 104.541  | 97.677   | 124.380 | 91.363  | 360.190 |
| <a href="#">AMK58_02765</a> | <a href="#">no KO assigned (GenBank) hypothetical protein</a>                                                             | Hypothetical                   | 716.701  | 702.411  | 853.392  | 87.965  | 40.367  | 273.856 |
| <a href="#">AMK58_02770</a> | <a href="#">no KO assigned (GenBank) hypothetical protein</a>                                                             | Hypothetical                   | 420.879  | 344.455  | 505.016  | 181.976 | 32.403  | 180.433 |
| <a href="#">AMK58_02775</a> | <a href="#">K16263 amino acid efflux transporter (GenBank) hypothetical protein</a>                                       | Transport                      | 250.758  | 256.050  | 358.559  | 258.530 | 29.133  | 135.015 |
| <a href="#">AMK58_02780</a> | <a href="#">no KO assigned (GenBank) hypothetical protein</a>                                                             | Hypothetical                   | 179.460  | 159.138  | 226.912  | 164.348 | 62.603  | 252.233 |
| <a href="#">AMK58_02785</a> | <a href="#">no KO assigned (GenBank) hypothetical protein</a>                                                             | Hypothetical                   | 132.961  | 135.423  | 189.499  | 203.288 | 94.457  | 289.133 |
| <a href="#">AMK58_02790</a> | <a href="#">no KO assigned (GenBank) 3'-5' exonuclease</a>                                                                | DNA Repair and Replication     | 32.287   | 50.854   | 48.978   | 196.196 | 121.577 | 237.603 |
| <a href="#">AMK58_02795</a> | <a href="#">K00449 protocatechuate 3,4-dioxygenase, beta subunit [EC:1.13.11.31] (GenBank) hypothetical protein</a>       | Metabolism                     | 28.269   | 30.001   | 42.971   | 225.715 | 277.831 | 263.170 |
| <a href="#">AMK58_02800</a> | <a href="#">no KO assigned (GenBank) hypothetical protein</a>                                                             | Hypothetical                   | 5.444    | 6.729    | 14.635   | 303.250 | 40.089  | 163.270 |
| <a href="#">AMK58_02805</a> | <a href="#">K03707 thiaminase (transcriptional activator TenA) [EC:3.5.99.21] (GenBank) thiaminase II</a>                 | Transcription                  | 53.084   | 55.392   | 58.424   | 101.305 | 76.833  | 222.854 |
| <a href="#">AMK58_02810</a> | <a href="#">no KO assigned (GenBank) hypothetical protein</a>                                                             | Hypothetical                   | 41.367   | 28.130   | 37.733   | 84.697  | 76.741  | 311.548 |
| <a href="#">AMK58_02815</a> | <a href="#">no KO assigned (GenBank) hypothetical protein</a>                                                             | Hypothetical                   | 111.297  | 150.388  | 112.350  | 157.727 | 89.560  | 297.071 |
| <a href="#">AMK58_02820</a> | <a href="#">no KO assigned (GenBank) hypothetical protein</a>                                                             | Hypothetical                   | 1677.382 | 1741.754 | 1857.473 | 107.951 | 133.339 | 315.407 |
| <a href="#">AMK58_02825</a> | <a href="#">no KO assigned (GenBank) hypothetical protein</a>                                                             | Hypothetical                   | 289.124  | 315.430  | 293.899  | 208.980 | 63.808  | 449.447 |
| <a href="#">AMK58_02830</a> | <a href="#">no KO assigned (GenBank) transposase</a>                                                                      | Genetic Information Processing | 12.273   | 16.921   | 17.728   | 147.959 | 82.505  | 266.777 |
| <a href="#">AMK58_02835</a> | <a href="#">no KO assigned (GenBank) transposase</a>                                                                      | Genetic Information Processing | 86.882   | 107.164  | 100.196  | 54.062  | 99.235  | 265.341 |
| <a href="#">AMK58_02840</a> | <a href="#">no KO assigned (GenBank) hypothetical protein</a>                                                             | Hypothetical                   | 333.917  | 334.408  | 304.928  | 126.788 | 146.624 | 323.444 |
| <a href="#">AMK58_02845</a> | <a href="#">no KO assigned (GenBank) transposase</a>                                                                      | Genetic Information Processing | 131.355  | 154.680  | 129.961  | 203.497 | 155.352 | 378.116 |
| <a href="#">AMK58_02850</a> | <a href="#">no KO assigned (GenBank) transposase</a>                                                                      | Genetic Information Processing | 0.992    | 1.185    | 1.320    | 4.383   | 10.366  | 22.987  |
| <a href="#">AMK58_02855</a> | <a href="#">no KO assigned (GenBank) hypothetical protein</a>                                                             | Hypothetical                   | 3.586    | 6.476    | 10.228   | 194.578 | 47.426  | 225.003 |
| <a href="#">AMK58_02860</a> | <a href="#">no KO assigned (GenBank) ATP-dependent endonuclease</a>                                                       | DNA Repair and Replication     | 41.134   | 46.060   | 34.142   | 44.844  | 15.994  | 303.176 |
| <a href="#">AMK58_02865</a> | <a href="#">K03657 DNA helicase II / ATP-dependent DNA helicase PerA [EC:3.6.4.12] (GenBank) Fis family transposase</a>   | DNA Repair and Replication     | 25.154   | 27.324   | 26.268   | 66.563  | 29.317  | 371.138 |
| <a href="#">AMK58_02870</a> | <a href="#">no KO assigned (GenBank) hypothetical protein</a>                                                             | Hypothetical                   | 72.842   | 56.849   | 65.827   | 94.938  | 79.295  | 323.118 |
| <a href="#">AMK58_02875</a> | <a href="#">K02342 DNA polymerase III subunit epsilon [EC:2.7.7.1] (GenBank) DNA polymerase III subunit epsilon</a>       | DNA Repair and Replication     | 30.795   | 17.141   | 33.826   | 52.012  | 32.250  | 195.629 |
| <a href="#">AMK58_02880</a> | <a href="#">no KO assigned (GenBank) AraC family transcriptional regulator</a>                                            | Transcription                  | 3.143    | 2.253    | 5.140    | 164.881 | 22.188  | 135.237 |
| <a href="#">AMK58_02885</a> | <a href="#">no KO assigned (GenBank) MFS transporter</a>                                                                  | Transport: MFS                 | 4.259    | 10.905   | 8.870    | 234.178 | 22.340  | 133.332 |
| <a href="#">AMK58_02890</a> | <a href="#">no KO assigned (GenBank) hypothetical protein</a>                                                             | Hypothetical                   | 8.072    | 4.822    | 14.198   | 94.608  | 51.715  | 405.294 |
| <a href="#">AMK58_02895</a> | <a href="#">no KO assigned (GenBank) hypothetical protein</a>                                                             | Hypothetical                   | 63.385   | 56.212   | 58.148   | 77.279  | 23.656  | 291.121 |
| <a href="#">AMK58_02900</a> | <a href="#">no KO assigned (GenBank) hypothetical protein</a>                                                             | Hypothetical                   | 103.673  | 105.443  | 105.614  | 84.647  | 32.185  | 326.967 |
| <a href="#">AMK58_02905</a> | <a href="#">no KO assigned (GenBank) hypothetical protein</a>                                                             | Hypothetical                   | 99.889   | 99.899   | 106.545  | 99.446  | 77.247  | 349.229 |
| <a href="#">AMK58_02910</a> | <a href="#">no KO assigned (GenBank) hypothetical protein</a>                                                             | Hypothetical                   | 128.797  | 141.015  | 128.418  | 108.514 | 58.466  | 301.412 |
| <a href="#">AMK58_02915</a> | <a href="#">no KO assigned (GenBank) transposase</a>                                                                      | Genetic Information Processing | 0.542    | 1.618    | 1.803    | 62.286  | 5.886   | 27.377  |
| <a href="#">AMK58_02920</a> | <a href="#">no KO assigned (GenBank) transposase</a>                                                                      | Genetic Information Processing | 6.331    | 12.833   | 7.954    | 108.124 | 34.563  | 201.058 |
| <a href="#">AMK58_02925</a> | <a href="#">no KO assigned (GenBank) transposase</a>                                                                      | Genetic Information Processing | 11.182   | 14.590   | 13.565   | 176.132 | 19.070  | 224.063 |
| <a href="#">AMK58_02930</a> | <a href="#">no KO assigned (GenBank) pseudogene</a>                                                                       | Pseudogene                     | 0.000    | 3.039    | 2.902    | 144.468 | 8.959   | 81.451  |
| <a href="#">AMK58_02935</a> | <a href="#">no KO assigned (GenBank) hypothetical protein</a>                                                             | Hypothetical                   | 0.000    | 0.000    | 1.265    | 128.323 | 5.484   | 34.956  |
| <a href="#">AMK58_02940</a> | <a href="#">no KO assigned (GenBank) hypothetical protein</a>                                                             | Hypothetical                   | 0.684    | 6.130    | 4.390    | 247.402 | 14.417  | 116.868 |
| <a href="#">AMK58_02945</a> | <a href="#">no KO assigned (GenBank) diguanylate cyclase</a>                                                              | cyclic nucleotide              | 142.914  | 202.378  | 179.189  | 199.362 | 35.452  | 174.177 |
| <a href="#">AMK58_02950</a> | <a href="#">no KO assigned (GenBank) hypothetical protein</a>                                                             | Hypothetical                   | 25.431   | 11.560   | 47.046   | 232.170 | 215.326 | 394.225 |
| <a href="#">AMK58_02955</a> | <a href="#">no KO assigned (GenBank) hypothetical protein</a>                                                             | Hypothetical                   | 1.183    | 1.766    | 4.357    | 87.925  | 17.448  | 221.661 |
| <a href="#">AMK58_02960</a> | <a href="#">no KO assigned (GenBank) hypothetical protein</a>                                                             | Hypothetical                   | 2.242    | 2.679    | 5.116    | 388.645 | 26.211  | 271.942 |
| <a href="#">AMK58_02965</a> | <a href="#">no KO assigned (GenBank) hypothetical protein</a>                                                             | Hypothetical                   | 0.637    | 0.000    | 2.626    | 149.666 | 7.879   | 86.073  |
| <a href="#">AMK58_02970</a> | <a href="#">no KO assigned (GenBank) hypothetical protein</a>                                                             | Hypothetical                   | 0.255    | 0.382    | 3.339    | 197.685 | 7.034   | 112.684 |
| <a href="#">AMK58_02975</a> | <a href="#">no KO assigned (GenBank) hypothetical protein</a>                                                             | Hypothetical                   | 0.364    | 1.086    | 2.593    | 154.880 | 4.700   | 70.464  |
| <a href="#">AMK58_02980</a> | <a href="#">no KO assigned (GenBank) hypothetical protein</a>                                                             | Hypothetical                   | 0.537    | 0.712    | 3.117    | 205.467 | 13.134  | 167.879 |
| <a href="#">AMK58_02985</a> | <a href="#">no KO assigned (GenBank) hypothetical protein</a>                                                             | Hypothetical                   | 0.942    | 2.815    | 2.314    | 206.887 | 9.532   | 100.184 |
| <a href="#">AMK58_02990</a> | <a href="#">no KO assigned (GenBank) hypothetical protein</a>                                                             | Hypothetical                   | 0.351    | 0.000    | 1.335    | 357.279 | 9.073   | 69.314  |
| <a href="#">AMK58_02995</a> | <a href="#">no KO assigned (GenBank) hydrolase</a>                                                                        | Hydrolase                      | 3.259    | 4.493    | 6.912    | 342.840 | 20.287  | 118.313 |
| <a href="#">AMK58_03000</a> | <a href="#">no KO assigned (GenBank) hypothetical protein</a>                                                             | Hypothetical                   | 4.376    | 2.905    | 7.397    | 337.399 | 44.271  | 122.189 |
| <a href="#">AMK58_03005</a> | <a href="#">no KO assigned (GenBank) glutathione S-transferase</a>                                                        | Transferase                    | 38.116   | 30.618   | 35.632   | 137.300 | 42.484  | 65.342  |
| <a href="#">AMK58_03010</a> | <a href="#">K00254 dihydroorotate dehydrogenase [EC:1.3.5.21] (GenBank) dihydroorotate dehydrogenase (quinone)</a>        | Metabolism: Nucleotide         | 74.854   | 74.087   | 82.427   | 263.816 | 65.766  | 107.984 |

|                             |                                                                                                                         |                                       |          |          |          |          |          |          |
|-----------------------------|-------------------------------------------------------------------------------------------------------------------------|---------------------------------------|----------|----------|----------|----------|----------|----------|
| <a href="#">AMK58_03015</a> | <a href="#">K13593 cyclic-di-GMP phosphodiesterase, flagellum assembly factor TipF</a>   (GenBank) diguanylate phosph   | Motility                              | 19.380   | 17.308   | 24.031   | 175.701  | 31.553   | 147.655  |
| <a href="#">AMK58_03020</a> | <a href="#">K01868 threonyl-tRNA synthetase [EC:6.1.1.31]</a>   (GenBank) threonine--tRNA ligase                        | tRNA synthesis/modification           | 202.469  | 169.703  | 150.504  | 114.975  | 178.202  | 232.138  |
| <a href="#">AMK58_03025</a> | <a href="#">K02520 translation initiation factor IF-3</a>   (GenBank) translation initiation factor IF-3                | Translation                           | 855.779  | 963.104  | 891.300  | 128.090  | 492.307  | 278.760  |
| <a href="#">AMK58_03030</a> | <a href="#">K05366 penicillin-binding protein 1A [EC:2.4.1.-3.4.-.1]</a>   (GenBank) hypothetical protein               | Defense                               | 3.418    | 5.891    | 7.000    | 193.003  | 63.096   | 196.990  |
| <a href="#">AMK58_03035</a> | no KO assigned   (GenBank) hypothetical protein                                                                         | Hypothetical                          | 3.243    | 1.076    | 2.570    | 187.769  | 17.619   | 35.920   |
| <a href="#">AMK58_03040</a> | no KO assigned   (GenBank) hypothetical protein                                                                         | Hypothetical                          | 14.056   | 20.358   | 18.225   | 160.759  | 30.642   | 119.577  |
| <a href="#">AMK58_03045</a> | no KO assigned   (GenBank) hypothetical protein                                                                         | Hypothetical                          | 100.129  | 152.607  | 104.919  | 182.031  | 35.028   | 391.760  |
| <a href="#">AMK58_03050</a> | no KO assigned   (GenBank) HAD family hydrolase                                                                         | Hydrolase                             | 35.106   | 43.765   | 45.995   | 189.772  | 34.179   | 107.400  |
| <a href="#">AMK58_03055</a> | no KO assigned   (GenBank) glycosyl transferase                                                                         | Transferase                           | 42.893   | 44.846   | 52.925   | 180.076  | 42.406   | 139.930  |
| <a href="#">AMK58_03060</a> | no KO assigned   (GenBank) alpha/beta hydrolase                                                                         | Hydrolase                             | 134.958  | 173.605  | 141.673  | 245.009  | 88.733   | 196.996  |
| <a href="#">AMK58_03065</a> | <a href="#">K14233 tRNA Ser1</a>   (GenBank) tRNA-Ser                                                                   | tRNA synthesis/modification           | 142.363  | 182.826  | 156.865  | 185.355  | 116.651  | 666.216  |
| <a href="#">AMK58_03070</a> | no KO assigned   (GenBank) hypothetical protein                                                                         | Hypothetical                          | 60.537   | 42.779   | 55.703   | 207.528  | 57.071   | 137.621  |
| <a href="#">AMK58_03075</a> | no KO assigned   (GenBank) peptidase                                                                                    | Peptidase                             | 85.888   | 87.845   | 76.650   | 169.113  | 29.293   | 217.863  |
| <a href="#">AMK58_03080</a> | <a href="#">K02014 iron complex outer membrane receptor protein</a>   (GenBank) TonB-dependent receptor                 | Transport: Metal                      | 75.888   | 68.327   | 60.604   | 159.394  | 25.139   | 147.666  |
| <a href="#">AMK58_03085</a> | <a href="#">K07165 transmembrane sensor</a>   (GenBank) hypothetical protein                                            | Membrane                              | 22.779   | 16.272   | 22.482   | 160.030  | 15.724   | 119.043  |
| <a href="#">AMK58_03090</a> | <a href="#">K03088 RNA polymerase sigma-70 factor, ECF subfamily</a>   (GenBank) hypothetical protein                   | Transcription                         | 99.627   | 139.160  | 122.794  | 231.385  | 39.921   | 182.625  |
| <a href="#">AMK58_03095</a> | <a href="#">K01130 arylsulfatase [EC:3.1.6.11]</a>   (GenBank) arylsulfatase                                            | Metabolism: Lipid                     | 14.827   | 11.667   | 13.685   | 90.200   | 36.422   | 241.373  |
| <a href="#">AMK58_03100</a> | no KO assigned   (GenBank) hypothetical protein                                                                         | Hypothetical                          | 1.156    | 2.302    | 4.030    | 201.668  | 22.628   | 124.685  |
| <a href="#">AMK58_03105</a> | <a href="#">K07114 Ca-activated chloride channel homolog</a>   (GenBank) hypothetical protein                           | Transport: Ion                        | 0.188    | 1.121    | 1.249    | 240.639  | 10.339   | 57.962   |
| <a href="#">AMK58_03110</a> | <a href="#">K07114 Ca-activated chloride channel homolog</a>   (GenBank) hypothetical protein                           | Transport: Ion                        | 1.059    | 2.372    | 2.642    | 192.851  | 17.105   | 111.288  |
| <a href="#">AMK58_03115</a> | <a href="#">K07114 Ca-activated chloride channel homolog</a>   (GenBank) hypothetical protein                           | Transport: Ion                        | 0.752    | 0.000    | 4.171    | 245.965  | 29.304   | 158.409  |
| <a href="#">AMK58_03120</a> | no KO assigned   (GenBank) hypothetical protein                                                                         | Hypothetical                          | 0.771    | 0.000    | 3.911    | 247.927  | 41.030   | 99.398   |
| <a href="#">AMK58_03125</a> | no KO assigned   (GenBank) MoxR protein                                                                                 | No COG                                | 1.886    | 5.258    | 3.945    | 163.702  | 55.257   | 123.345  |
| <a href="#">AMK58_03130</a> | <a href="#">K03924 MoxR-like ATPase [EC:3.6.3.-1]</a>   (GenBank) AAA family ATPase                                     | No COG                                | 0.623    | 0.744    | 1.184    | 74.919   | 16.382   | 100.719  |
| <a href="#">AMK58_03135</a> | no KO assigned   (GenBank) haloacid dehalogenase                                                                        | enzyme                                | 0.958    | 2.862    | 3.644    | 158.657  | 25.173   | 216.988  |
| <a href="#">AMK58_03140</a> | no KO assigned   (GenBank) gliding motility-associated lipoprotein GldK                                                 | Motility                              | 0.789    | 4.712    | 3.750    | 119.394  | 32.656   | 258.915  |
| <a href="#">AMK58_03145</a> | no KO assigned   (GenBank) hypothetical protein                                                                         | Hypothetical                          | 0.984    | 0.000    | 1.872    | 65.929   | 38.726   | 202.633  |
| <a href="#">AMK58_03150</a> | no KO assigned   (GenBank) hypothetical protein                                                                         | Hypothetical                          | 13.499   | 19.223   | 17.890   | 76.455   | 56.922   | 237.122  |
| <a href="#">AMK58_03155</a> | no KO assigned   (GenBank) hypothetical protein                                                                         | Hypothetical                          | 37.017   | 45.509   | 50.063   | 168.093  | 73.154   | 177.327  |
| <a href="#">AMK58_03160</a> | no KO assigned   (GenBank) CoA-transferase                                                                              | Metabolism                            | 45.525   | 54.164   | 49.681   | 210.502  | 34.626   | 89.711   |
| <a href="#">AMK58_03165</a> | no KO assigned   (GenBank) enoyl-CoA hydratase                                                                          | Metabolism                            | 11.816   | 13.752   | 13.569   | 114.291  | 9.314    | 24.048   |
| <a href="#">AMK58_03170</a> | no KO assigned   (GenBank) hypothetical protein                                                                         | Hypothetical                          | 41.779   | 54.337   | 50.263   | 161.424  | 13.737   | 72.211   |
| <a href="#">AMK58_03175</a> | <a href="#">K01426 amidase [EC:3.5.1.41]</a>   (GenBank) hypothetical protein                                           | Metabolism: Carbohydrate              | 22.261   | 26.791   | 27.638   | 136.549  | 11.341   | 45.220   |
| <a href="#">AMK58_03180</a> | no KO assigned   (GenBank) short-chain dehydrogenase                                                                    | enzyme                                | 33.091   | 50.810   | 41.755   | 161.564  | 10.429   | 62.372   |
| <a href="#">AMK58_03185</a> | no KO assigned   (GenBank) hypothetical protein                                                                         | Hypothetical                          | 136.597  | 140.343  | 132.928  | 169.394  | 40.712   | 229.241  |
| <a href="#">AMK58_03190</a> | <a href="#">K01997 branched-chain amino acid transport system permease protein</a>   (GenBank) hypothetical protein     | Transport: Amino Acid                 | 77.411   | 82.293   | 89.712   | 164.585  | 34.836   | 152.631  |
| <a href="#">AMK58_03195</a> | <a href="#">K01998 branched-chain amino acid transport system permease protein</a>   (GenBank) hypothetical protein     | Transport: Amino Acid                 | 34.710   | 27.416   | 36.247   | 172.431  | 12.697   | 99.613   |
| <a href="#">AMK58_03200</a> | <a href="#">K01995 branched-chain amino acid transport system ATP-binding protein</a>   (GenBank) livG: ABC transporter | Transport: Amino Acid                 | 25.612   | 25.967   | 34.978   | 171.959  | 16.052   | 87.876   |
| <a href="#">AMK58_03205</a> | <a href="#">K01996 branched-chain amino acid transport system ATP-binding protein</a>   (GenBank) ABC transporter A     | Membrane Transport                    | 34.084   | 30.393   | 34.665   | 171.953  | 24.588   | 109.282  |
| <a href="#">AMK58_03210</a> | no KO assigned   (GenBank) hypothetical protein                                                                         | Hypothetical                          | 285.181  | 258.683  | 209.654  | 111.704  | 43.862   | 169.520  |
| <a href="#">AMK58_03215</a> | no KO assigned   (GenBank) hypothetical protein                                                                         | Hypothetical                          | 254.148  | 242.049  | 185.050  | 169.909  | 21.018   | 94.642   |
| <a href="#">AMK58_03220</a> | no KO assigned   (GenBank) hypothetical protein                                                                         | Hypothetical                          | 40.511   | 40.490   | 40.907   | 272.554  | 13.096   | 135.288  |
| <a href="#">AMK58_03225</a> | <a href="#">K02004 putative ABC transport system permease protein</a>   (GenBank) hypothetical protein                  | Membrane Transport                    | 15.679   | 16.768   | 21.993   | 107.994  | 9.573    | 40.385   |
| <a href="#">AMK58_03230</a> | <a href="#">K02003 putative ABC transport system ATP-binding protein</a>   (GenBank) hypothetical protein               | Membrane Transport                    | 55.210   | 73.300   | 66.309   | 199.164  | 15.242   | 80.235   |
| <a href="#">AMK58_03235</a> | no KO assigned   (GenBank) hypothetical protein                                                                         | Hypothetical                          | 133.913  | 109.733  | 114.769  | 214.191  | 21.129   | 178.287  |
| <a href="#">AMK58_03240</a> | no KO assigned   (GenBank) hypothetical protein                                                                         | Hypothetical                          | 94.095   | 91.252   | 89.996   | 143.966  | 18.672   | 84.978   |
| <a href="#">AMK58_03245</a> | no KO assigned   (GenBank) virulence factor                                                                             | Defense                               | 76.843   | 64.585   | 63.427   | 150.782  | 14.176   | 99.573   |
| <a href="#">AMK58_03250</a> | no KO assigned   (GenBank) hypothetical protein                                                                         | Hypothetical                          | 85.781   | 84.536   | 78.198   | 168.271  | 15.950   | 171.871  |
| <a href="#">AMK58_03255</a> | no KO assigned   (GenBank) hypothetical protein                                                                         | Hypothetical                          | 57.238   | 57.336   | 57.111   | 203.622  | 18.878   | 90.022   |
| <a href="#">AMK58_03260</a> | no KO assigned   (GenBank) hypothetical protein                                                                         | Hypothetical                          | 70.403   | 75.015   | 75.840   | 195.900  | 24.005   | 85.034   |
| <a href="#">AMK58_03265</a> | no KO assigned   (GenBank) hypothetical protein                                                                         | Hypothetical                          | 89.022   | 104.135  | 80.639   | 202.145  | 64.825   | 139.822  |
| <a href="#">AMK58_03270</a> | no KO assigned   (GenBank) metallophosphoesterase                                                                       | Hydrolase                             | 30.503   | 32.243   | 42.389   | 165.958  | 183.304  | 242.381  |
| <a href="#">AMK58_03275</a> | no KO assigned   (GenBank) inositol monophosphatase                                                                     | Phosphatase                           | 271.914  | 244.133  | 236.473  | 117.585  | 669.692  | 259.156  |
| <a href="#">AMK58_03280</a> | no KO assigned   (GenBank) cytochrome B                                                                                 | Energy                                | 110.643  | 101.147  | 108.452  | 283.596  | 75.351   | 164.282  |
| <a href="#">AMK58_03285</a> | no KO assigned   (GenBank) cytochrome C                                                                                 | Energy                                | 972.991  | 1115.378 | 1180.687 | 206.318  | 126.527  | 278.510  |
| <a href="#">AMK58_03290</a> | <a href="#">K00812 aspartate aminotransferase [EC:2.6.1.11]</a>   (GenBank) aspartate aminotransferase                  | Metabolism: Amino Acid                | 616.216  | 521.824  | 493.217  | 165.951  | 254.357  | 238.689  |
| <a href="#">AMK58_03295</a> | <a href="#">K03313 Na<sup>+</sup>:H<sup>+</sup> antiporter, NhaA family</a>   (GenBank) nhaA: sodium/proton antiporter  | Transport: Ion                        | 32.859   | 30.066   | 43.064   | 198.668  | 141.972  | 201.390  |
| <a href="#">AMK58_03300</a> | no KO assigned   (GenBank) hypothetical protein                                                                         | Hypothetical                          | 10.222   | 14.741   | 13.070   | 87.585   | 82.706   | 240.881  |
| <a href="#">AMK58_03305</a> | no KO assigned   (GenBank) hypothetical protein                                                                         | Hypothetical                          | 1989.326 | 2186.811 | 1920.248 | 1841.110 | 1056.612 | 1769.807 |
| <a href="#">AMK58_03310</a> | <a href="#">K02355 elongation factor G</a>   (GenBank) elongation factor G                                              | Translation                           | 70.686   | 86.519   | 99.657   | 107.090  | 30.221   | 44.633   |
| <a href="#">AMK58_03315</a> | <a href="#">K00077 2-dehydropantoate 2-reductase [EC:1.1.1.169]</a>   (GenBank) hypothetical protein                    | Biosynthesis: Co-Factors and Vitamins | 16.117   | 27.400   | 17.691   | 115.847  | 46.101   | 111.176  |
| <a href="#">AMK58_03320</a> | no KO assigned   (GenBank) chemotaxis protein                                                                           | Chemotaxis                            | 1154.394 | 1367.318 | 1112.114 | 165.153  | 2202.663 | 496.999  |
| <a href="#">AMK58_03325</a> | <a href="#">K04047 starvation-inducible DNA-binding protein</a>   (GenBank) DNA starvation/stationary phase protecti    | Starvation                            | 24.318   | 21.639   | 18.695   | 160.453  | 367.277  | 142.016  |
| <a href="#">AMK58_03330</a> | <a href="#">K15977 putative oxidoreductase</a>   (GenBank) hypothetical protein                                         | Oxidoreductase                        | 295.784  | 264.913  | 256.998  | 346.779  | 1920.824 | 555.193  |
| <a href="#">AMK58_03335</a> | <a href="#">K00384 thioredoxin reductase (NADPH) [EC:1.8.1.91]</a>   (GenBank) thioredoxin reductase                    | Energy                                | 3.954    | 4.169    | 4.976    | 83.040   | 202.375  | 140.742  |
| <a href="#">AMK58_03340</a> | no KO assigned   (GenBank) hypothetical protein                                                                         | Hypothetical                          | 2.440    | 1.121    | 5.533    | 242.650  | 122.800  | 217.055  |
| <a href="#">AMK58_03345</a> | no KO assigned   (GenBank) hypothetical protein                                                                         | Hypothetical                          | 39.068   | 28.626   | 36.796   | 295.489  | 43.707   | 221.805  |

|                             |                                                                                                                            |                                       |          |          |          |          |          |          |
|-----------------------------|----------------------------------------------------------------------------------------------------------------------------|---------------------------------------|----------|----------|----------|----------|----------|----------|
| <a href="#">AMK58_03350</a> | <a href="#">K07276 uncharacterized protein   (GenBank) hypothetical protein</a>                                            | Hypothetical                          | 280.918  | 248.425  | 286.169  | 47.018   | 81.106   | 176.683  |
| <a href="#">AMK58_03355</a> | <a href="#">no KO assigned   (GenBank) ArsR family transcriptional regulator</a>                                           | Transcription                         | 103.623  | 130.334  | 140.632  | 327.002  | 139.771  | 250.634  |
| <a href="#">AMK58_03360</a> | <a href="#">no KO assigned   (GenBank) diene lactone hydrolase</a>                                                         | Hydrolase                             | 1150.741 | 1135.002 | 1041.751 | 86.784   | 906.840  | 226.386  |
| <a href="#">AMK58_03365</a> | <a href="#">K03624 transcription elongation factor GreA   (GenBank) transcription elongation factor GreA</a>               | Transcription                         | 1239.764 | 1170.922 | 1287.125 | 1329.642 | 1556.029 | 1321.064 |
| <a href="#">AMK58_03370</a> | <a href="#">K01955 carbamoyl-phosphate synthase large subunit [EC:6.3.5.5]   (GenBank) carbamoyl phosphate synth</a>       | Metabolism                            | 11.467   | 12.011   | 14.655   | 43.988   | 9.793    | 19.333   |
| <a href="#">AMK58_03375</a> | <a href="#">no KO assigned   (GenBank) hypothetical protein</a>                                                            | Hypothetical                          | 10.052   | 7.171    | 11.127   | 91.443   | 28.669   | 86.254   |
| <a href="#">AMK58_03380</a> | <a href="#">no KO assigned   (GenBank) hypothetical protein</a>                                                            | Hypothetical                          | 65.884   | 55.643   | 88.553   | 254.137  | 137.256  | 399.821  |
| <a href="#">AMK58_03385</a> | <a href="#">K07507 putative Mg<sup>2+</sup> transporter-C (MgtC) family protein   (GenBank) magnesium transporter MgtC</a> | Transport: Ion                        | 32.885   | 31.752   | 42.795   | 100.560  | 35.097   | 146.613  |
| <a href="#">AMK58_03390</a> | <a href="#">no KO assigned   (GenBank) diguanylate cyclase</a>                                                             | cyclic nucleotide                     | 405.797  | 408.725  | 400.810  | 576.221  | 215.481  | 819.660  |
| <a href="#">AMK58_03395</a> | <a href="#">K03466 DNA segregation ATPase FtsK/SpoIIIE, S-DNA-T family   (GenBank) cell division protein FtsK</a>          | Cell Cycle/Shape/Homeostasis          | 23.771   | 20.588   | 25.878   | 32.625   | 9.848    | 52.858   |
| <a href="#">AMK58_03400</a> | <a href="#">no KO assigned   (GenBank) pseudogene</a>                                                                      | Pseudogene                            | 166.614  | 123.818  | 147.010  | 233.781  | 481.230  | 615.207  |
| <a href="#">AMK58_03405</a> | <a href="#">no KO assigned   (GenBank) hypothetical protein</a>                                                            | Hypothetical                          | 59.423   | 63.277   | 68.160   | 238.948  | 391.111  | 295.147  |
| <a href="#">AMK58_03410</a> | <a href="#">no KO assigned   (GenBank) hypothetical protein</a>                                                            | Hypothetical                          | 88.832   | 102.213  | 85.401   | 157.926  | 360.820  | 114.202  |
| <a href="#">AMK58_03415</a> | <a href="#">K07304 peptide-methionine (S)-S-oxide reductase [EC:1.8.4.11]   (GenBank) methionine sulfoxide reduct</a>      | Oxidoreductase                        | 15.302   | 14.856   | 20.550   | 120.166  | 114.593  | 84.956   |
| <a href="#">AMK58_03420</a> | <a href="#">no KO assigned   (GenBank) hypothetical protein</a>                                                            | Hypothetical                          | 25.022   | 20.897   | 51.420   | 413.754  | 231.358  | 123.996  |
| <a href="#">AMK58_03425</a> | <a href="#">K03214 RNA methyltransferase, TrmH family [EC:2.1.1.-]   (GenBank) RNA methyltransferase</a>                   | tRNA synthesis/modification           | 8.798    | 10.012   | 15.137   | 308.658  | 201.393  | 148.786  |
| <a href="#">AMK58_03430</a> | <a href="#">no KO assigned   (GenBank) short-chain dehydrogenase</a>                                                       | enzyme                                | 66.567   | 62.485   | 60.484   | 67.083   | 133.327  | 133.605  |
| <a href="#">AMK58_03435</a> | <a href="#">no KO assigned   (GenBank) cytochrome B</a>                                                                    | Energy                                | 19.447   | 14.992   | 20.081   | 205.043  | 71.220   | 77.367   |
| <a href="#">AMK58_03440</a> | <a href="#">no KO assigned   (GenBank) hypothetical protein</a>                                                            | Hypothetical                          | 83.177   | 91.155   | 116.523  | 448.319  | 184.777  | 355.064  |
| <a href="#">AMK58_03445</a> | <a href="#">K08738 cytochrome c   (GenBank) cytochrome C</a>                                                               | Energy                                | 40.043   | 47.093   | 47.966   | 255.105  | 72.300   | 217.230  |
| <a href="#">AMK58_03450</a> | <a href="#">K02019 molybdate transport system regulatory protein   (GenBank) LysR family transcriptional regulat</a>       | transcription                         | 3173.762 | 2602.662 | 2870.637 | 839.948  | 507.681  | 1008.226 |
| <a href="#">AMK58_03455</a> | <a href="#">K00138 aldehyde dehydrogenase [EC:1.2.1.-]   (GenBank) aldehyde dehydrogenase</a>                              | Metabolism: Carbohydrate              | 33.433   | 36.144   | 30.275   | 27.298   | 50.017   | 68.056   |
| <a href="#">AMK58_03460</a> | <a href="#">K09959 uncharacterized protein   (GenBank) acetaldehyde dehydrogenase</a>                                      | Metabolism: Carbohydrate              | 227.961  | 278.793  | 297.990  | 943.550  | 129.005  | 671.571  |
| <a href="#">AMK58_03465</a> | <a href="#">no KO assigned   (GenBank) FIST domain containing protein</a>                                                  | No COG                                | 105.916  | 151.132  | 143.945  | 464.053  | 61.752   | 390.795  |
| <a href="#">AMK58_03470</a> | <a href="#">K20975 two-component system, sensor histidine kinase [EC:2.7.13.31]   (GenBank) hypothetical protein</a>       | Signal Transduction                   | 9.043    | 10.645   | 9.487    | 36.280   | 11.717   | 58.365   |
| <a href="#">AMK58_03475</a> | <a href="#">K01992 ABC-2 type transport system permease protein   (GenBank) multidrug ABC transporter permease</a>         | Membrane Transport                    | 8.520    | 8.037    | 15.349   | 184.812  | 12.433   | 79.282   |
| <a href="#">AMK58_03480</a> | <a href="#">K01990 ABC-2 type transport system ATP-binding protein   (GenBank) ABC transporter ATP-binding pr</a>          | Membrane Transport                    | 77.122   | 57.595   | 70.687   | 138.547  | 46.834   | 274.841  |
| <a href="#">AMK58_03485</a> | <a href="#">no KO assigned   (GenBank) hypothetical protein</a>                                                            | Hypothetical                          | 24.990   | 32.099   | 28.988   | 227.629  | 15.871   | 166.725  |
| <a href="#">AMK58_03490</a> | <a href="#">no KO assigned   (GenBank) branched-chain amino acid ABC transporter substrate-binding protein</a>             | Membrane Transport                    | 7.649    | 9.019    | 8.708    | 74.015   | 5.430    | 68.500   |
| <a href="#">AMK58_03495</a> | <a href="#">no KO assigned   (GenBank) cytochrome c-550 PedF</a>                                                           | Energy                                | 17.725   | 13.033   | 19.964   | 373.685  | 34.943   | 252.607  |
| <a href="#">AMK58_03500</a> | <a href="#">no KO assigned   (GenBank) ABC transporter substrate-binding protein</a>                                       | Membrane Transport                    | 3.094    | 2.520    | 7.354    | 190.441  | 10.590   | 114.356  |
| <a href="#">AMK58_03505</a> | <a href="#">K17226 sulfur-oxidizing protein SoxY   (GenBank) quinoprotein dehydrogenase-associated SoxYZ-like ca</a>       | Energy                                | 8.313    | 9.031    | 12.360   | 202.277  | 20.728   | 244.162  |
| <a href="#">AMK58_03510</a> | <a href="#">no KO assigned   (GenBank) MBL fold metallo-hydrolase</a>                                                      | Hydrolase                             | 106.754  | 112.781  | 152.130  | 173.173  | 168.873  | 377.975  |
| <a href="#">AMK58_03515</a> | <a href="#">K00114 alcohol dehydrogenase (cytochrome c) [EC:1.1.2.8]   (GenBank) dehydrogenase</a>                         | Metabolism: Carbohydrate              | 48.789   | 47.481   | 59.991   | 56.932   | 44.044   | 62.415   |
| <a href="#">AMK58_03520</a> | <a href="#">no KO assigned   (GenBank) two-component system response regulator</a>                                         | Signal Transduction                   | 2.909    | 2.172    | 3.111    | 183.616  | 64.981   | 74.172   |
| <a href="#">AMK58_03525</a> | <a href="#">no KO assigned   (GenBank) hypothetical protein</a>                                                            | Hypothetical                          | 5.146    | 9.709    | 8.499    | 333.805  | 108.996  | 131.609  |
| <a href="#">AMK58_03530</a> | <a href="#">K02049 NiT/TauT family transport system ATP-binding protein   (GenBank) ABC transporter</a>                    | Transport: NiT/TauT                   | 14.304   | 15.261   | 16.191   | 154.202  | 117.526  | 153.009  |
| <a href="#">AMK58_03535</a> | <a href="#">K02050 NiT/TauT family transport system permease protein   (GenBank) ABC transporter permease</a>              | Transport: NiT/TauT                   | 65.562   | 90.539   | 92.065   | 309.628  | 401.825  | 213.446  |
| <a href="#">AMK58_03540</a> | <a href="#">K02051 NiT/TauT family transport system substrate-binding protein   (GenBank) ABC transporter subst</a>        | Transport: NiT/TauT                   | 13.246   | 17.751   | 21.188   | 212.931  | 26.718   | 106.530  |
| <a href="#">AMK58_03545</a> | <a href="#">no KO assigned   (GenBank) sulfurtransferase</a>                                                               | Transferase                           | 38.917   | 28.295   | 51.686   | 46.339   | 74.064   | 124.299  |
| <a href="#">AMK58_03550</a> | <a href="#">K08738 cytochrome c   (GenBank) cytochrome C</a>                                                               | Energy                                | 26.803   | 42.334   | 40.131   | 278.564  | 280.151  | 331.096  |
| <a href="#">AMK58_03555</a> | <a href="#">no KO assigned   (GenBank) cupin</a>                                                                           | No COG                                | 10.701   | 12.787   | 24.128   | 59.796   | 58.080   | 170.673  |
| <a href="#">AMK58_03560</a> | <a href="#">K14228 tRNA Leu   (GenBank) tRNA-Leu</a>                                                                       | tRNA synthesis/modification           | 918.498  | 1164.020 | 1030.778 | 1472.722 | 1201.374 | 1045.269 |
| <a href="#">AMK58_03565</a> | <a href="#">no KO assigned   (GenBank) disulfide bond formation protein</a>                                                | Oxidoreductase                        | 147.068  | 156.659  | 175.388  | 190.286  | 277.056  | 167.242  |
| <a href="#">AMK58_03570</a> | <a href="#">K06134 ubiquinone biosynthesis monooxygenase Cof7 [EC:1.14.13.-]   (GenBank) ubiquinone biosynth</a>           | Biosynthesis: Co-Factors and Vitamins | 832.389  | 834.325  | 852.273  | 192.289  | 4891.622 | 478.209  |
| <a href="#">AMK58_03575</a> | <a href="#">no KO assigned   (GenBank) MFS transporter</a>                                                                 | Transport: MFS                        | 30.913   | 33.346   | 32.250   | 368.081  | 51.879   | 401.902  |
| <a href="#">AMK58_03580</a> | <a href="#">K01894 glutamyl-O tRNA(Asp) synthetase [EC:6.1.1.-]   (GenBank) glutamyl-O tRNA(Asp) synthetase</a>            | tRNA synthesis/modification           | 282.934  | 343.849  | 333.061  | 423.930  | 195.993  | 322.973  |
| <a href="#">AMK58_03585</a> | <a href="#">no KO assigned   (GenBank) hypothetical protein</a>                                                            | Hypothetical                          | 22.917   | 23.364   | 25.879   | 93.875   | 42.727   | 100.303  |
| <a href="#">AMK58_03590</a> | <a href="#">no KO assigned   (GenBank) DNA mismatch repair protein MutT</a>                                                | DNA Repair and Replication            | 25.527   | 46.008   | 28.339   | 84.436   | 36.227   | 137.659  |
| <a href="#">AMK58_03595</a> | <a href="#">K03413 two-component system, chemotaxis family, response regulator CheY   (GenBank) regulator</a>              | Chemotaxis                            | 4305.606 | 5247.110 | 4185.016 | 426.674  | 4292.519 | 1346.372 |
| <a href="#">AMK58_03600</a> | <a href="#">K07180 serine protein kinase   (GenBank) serine/threonine protein kinase</a>                                   | Signal Transduction                   | 435.111  | 553.198  | 481.998  | 85.550   | 550.035  | 188.961  |
| <a href="#">AMK58_03605</a> | <a href="#">K09786 uncharacterized protein   (GenBank) hypothetical protein</a>                                            | Hypothetical                          | 623.633  | 671.887  | 588.950  | 122.800  | 598.157  | 346.968  |
| <a href="#">AMK58_03610</a> | <a href="#">no KO assigned   (GenBank) SpoVR family protein</a>                                                            | No COG                                | 65.009   | 71.564   | 81.330   | 141.144  | 154.274  | 103.761  |
| <a href="#">AMK58_03615</a> | <a href="#">K01768 adenylate cyclase [EC:4.6.1.1]   (GenBank) hypothetical protein</a>                                     | Metabolism: Nucleotide                | 9.034    | 4.693    | 7.376    | 60.507   | 27.042   | 37.970   |
| <a href="#">AMK58_03620</a> | <a href="#">no KO assigned   (GenBank) DNA-binding protein</a>                                                             | No COG                                | 25.224   | 27.400   | 36.629   | 788.199  | 210.326  | 322.137  |
| <a href="#">AMK58_03625</a> | <a href="#">K03579 ATP-dependent helicase HrpB [EC:3.6.4.13]   (GenBank) ATP-dependent helicase</a>                        | Hydrolase                             | 0.476    | 1.423    | 1.993    | 104.294  | 25.119   | 97.468   |
| <a href="#">AMK58_03630</a> | <a href="#">K02049 NiT/TauT family transport system ATP-binding protein   (GenBank) nitrate ABC transporter ATP</a>        | Transport: NiT/TauT                   | 1.926    | 2.192    | 4.361    | 217.108  | 58.771   | 151.649  |
| <a href="#">AMK58_03635</a> | <a href="#">K02050 NiT/TauT family transport system permease protein   (GenBank) sulfonate ABC transporter perm</a>        | Transport: NiT/TauT                   | 3.152    | 4.094    | 4.430    | 22.579   | 6.162    | 72.178   |
| <a href="#">AMK58_03640</a> | <a href="#">no KO assigned   (GenBank) rubrerythrin</a>                                                                    | Iron Homeostasis                      | 6.684    | 4.607    | 13.687   | 40.977   | 25.716   | 123.473  |
| <a href="#">AMK58_03645</a> | <a href="#">no KO assigned   (GenBank) hypothetical protein</a>                                                            | Hypothetical                          | 9.095    | 10.188   | 25.402   | 1126.164 | 170.596  | 654.643  |
| <a href="#">AMK58_03650</a> | <a href="#">K07315 phosphoserine phosphatase RsbU/P [EC:3.1.3.31]   (GenBank) regulator</a>                                | Signal Transduction                   | 3.748    | 6.315    | 6.213    | 17.506   | 24.302   | 57.471   |
| <a href="#">AMK58_03655</a> | <a href="#">K20978 HtpB-dependent secretion and biofilm anti anti-sigma factor   (GenBank) anti-anti-sigma facto</a>       | Signal Transduction                   | 7.122    | 26.003   | 21.820   | 470.657  | 310.880  | 364.693  |
| <a href="#">AMK58_03660</a> | <a href="#">no KO assigned   (GenBank) hypothetical protein</a>                                                            | Hypothetical                          | 115.272  | 187.537  | 153.116  | 60.069   | 79.758   | 117.039  |
| <a href="#">AMK58_03665</a> | <a href="#">no KO assigned   (GenBank) aldolase</a>                                                                        | Metabolism                            | 423.617  | 575.909  | 592.711  | 243.473  | 112.921  | 204.347  |
| <a href="#">AMK58_03670</a> | <a href="#">K07340 inner membrane protein   (GenBank) hypothetical protein</a>                                             | Membrane                              | 310.166  | 298.447  | 324.694  | 313.030  | 273.773  | 425.787  |
| <a href="#">AMK58_03675</a> | <a href="#">no KO assigned   (GenBank) hypothetical protein</a>                                                            | Hypothetical                          | 2.185    | 3.435    | 6.778    | 265.843  | 87.498   | 200.230  |
| <a href="#">AMK58_03680</a> | <a href="#">no KO assigned   (GenBank) hypothetical protein</a>                                                            | Hypothetical                          | 93.335   | 87.739   | 89.158   | 43.570   | 221.075  | 121.146  |

|                             |                                                                                                                      |                                       |           |           |           |           |           |           |
|-----------------------------|----------------------------------------------------------------------------------------------------------------------|---------------------------------------|-----------|-----------|-----------|-----------|-----------|-----------|
| <a href="#">AMK58_03685</a> | <a href="#">K05805 CreA protein   (GenBank) CREA protein</a>                                                         | No COG                                | 83.891    | 117.850   | 102.184   | 419.132   | 630.259   | 283.618   |
| <a href="#">AMK58_03690</a> | <a href="#">K07120 uncharacterized protein   (GenBank) ammonia monooxygenase</a>                                     | Nitrogen                              | 88.925    | 133.501   | 123.682   | 132.101   | 167.874   | 153.922   |
| <a href="#">AMK58_03695</a> | <a href="#">no KO assigned   (GenBank) succinylglutamate desuccinylase</a>                                           | Metabolism                            | 75.751    | 84.430    | 72.751    | 204.310   | 164.571   | 225.602   |
| <a href="#">AMK58_03700</a> | <a href="#">no KO assigned   (GenBank) N-formylglutamate amidohydrolase</a>                                          | Cell Wall                             | 56.557    | 91.775    | 85.377    | 185.382   | 167.487   | 149.693   |
| <a href="#">AMK58_03705</a> | <a href="#">K00858 NAD+ kinase [EC:2.7.1.23]   (GenBank) ppnK: NAD kinase</a>                                        | Signal Transduction                   | 353.796   | 398.241   | 362.813   | 227.769   | 1119.608  | 316.564   |
| <a href="#">AMK58_03710</a> | <a href="#">K03639 GTP 3'-8-cyclase [EC:4.1.99.22]   (GenBank) cyclic pyranopterin phosphate synthase MoaA</a>       | Biosynthesis: Co-Factors and Vitamins | 46.967    | 33.841    | 49.032    | 407.678   | 179.203   | 253.865   |
| <a href="#">AMK58_03715</a> | <a href="#">no KO assigned   (GenBank) 4Fe-4S ferredoxin</a>                                                         | Ferredoxin                            | 16.202    | 20.967    | 17.574    | 54.689    | 32.544    | 58.575    |
| <a href="#">AMK58_03720</a> | <a href="#">K03823 phosphoinositric acetyltransferase [EC:2.3.1.183]   (GenBank) GCN5 family acetyltransferase</a>   | Metabolism: Amino Acid                | 37.997    | 44.889    | 52.457    | 542.057   | 307.899   | 326.458   |
| <a href="#">AMK58_03725</a> | <a href="#">no KO assigned   (GenBank) hypothetical protein</a>                                                      | Hypothetical                          | 3.363     | 1.546     | 4.551     | 82.566    | 34.896    | 30.466    |
| <a href="#">AMK58_03730</a> | <a href="#">no KO assigned   (GenBank) hypothetical protein</a>                                                      | Hypothetical                          | 222.597   | 275.564   | 250.497   | 492.602   | 365.451   | 413.283   |
| <a href="#">AMK58_03735</a> | <a href="#">K07716 two-component system, cell cycle sensor histidine kinase PleC [EC:2.7.13.3]   (GenBank) hypot</a> | Signal Transduction                   | 168.915   | 254.969   | 282.838   | 300.799   | 42.759    | 118.719   |
| <a href="#">AMK58_03740</a> | <a href="#">no KO assigned   (GenBank) hypothetical protein</a>                                                      | Hypothetical                          | 105.243   | 158.295   | 150.216   | 421.617   | 150.293   | 236.633   |
| <a href="#">AMK58_03745</a> | <a href="#">no KO assigned   (GenBank) hypothetical protein</a>                                                      | Hypothetical                          | 42.844    | 35.183    | 40.890    | 91.334    | 41.781    | 133.411   |
| <a href="#">AMK58_03750</a> | <a href="#">no KO assigned   (GenBank) enoyl-CoA hydratase</a>                                                       | Metabolism                            | 18.973    | 23.366    | 23.340    | 175.633   | 32.082    | 82.485    |
| <a href="#">AMK58_03755</a> | <a href="#">K00925 acetate kinase [EC:2.7.2.1]   (GenBank) acetate kinase</a>                                        | Signal Transduction                   | 146.211   | 141.201   | 129.592   | 19.988    | 14.746    | 86.454    |
| <a href="#">AMK58_03760</a> | <a href="#">no KO assigned   (GenBank) hypothetical protein</a>                                                      | Hypothetical                          | 1039.480  | 1541.943  | 1102.175  | 278.487   | 231.397   | 327.060   |
| <a href="#">AMK58_03765</a> | <a href="#">no KO assigned   (GenBank) hypothetical protein</a>                                                      | Hypothetical                          | 757.685   | 875.293   | 975.094   | 441.012   | 560.530   | 499.831   |
| <a href="#">AMK58_03770</a> | <a href="#">no KO assigned   (GenBank) hypothetical protein</a>                                                      | Hypothetical                          | 28.678    | 35.742    | 38.373    | 161.168   | 320.433   | 80.834    |
| <a href="#">AMK58_03775</a> | <a href="#">no KO assigned   (GenBank) hypothetical protein</a>                                                      | Hypothetical                          | 79.148    | 78.082    | 83.108    | 41.737    | 1041.383  | 78.628    |
| <a href="#">AMK58_03780</a> | <a href="#">no KO assigned   (GenBank) hypothetical protein</a>                                                      | Hypothetical                          | 183.227   | 220.222   | 201.330   | 350.321   | 1384.219  | 255.725   |
| <a href="#">AMK58_03785</a> | <a href="#">no KO assigned   (GenBank) hypothetical protein</a>                                                      | Hypothetical                          | 29.351    | 19.341    | 36.731    | 128.072   | 309.788   | 126.478   |
| <a href="#">AMK58_03790</a> | <a href="#">no KO assigned   (GenBank) hypothetical protein</a>                                                      | Hypothetical                          | 587.740   | 729.872   | 871.343   | 151.714   | 464.679   | 150.199   |
| <a href="#">AMK58_03795</a> | <a href="#">no KO assigned   (GenBank) two-component system response regulator</a>                                   | Signal Transduction                   | 1124.918  | 1139.040  | 1461.125  | 167.323   | 401.300   | 187.793   |
| <a href="#">AMK58_03800</a> | <a href="#">no KO assigned   (GenBank) two-component system response regulator</a>                                   | Signal Transduction                   | 145.114   | 152.010   | 165.838   | 683.061   | 475.340   | 526.203   |
| <a href="#">AMK58_03805</a> | <a href="#">K03657 DNA helicase II / ATP-dependent DNA helicase PerA [EC:3.6.4.12]   (GenBank) DNA helicase I</a>    | DNA Repair and Replication            | 11.745    | 9.583     | 14.464    | 83.727    | 46.586    | 70.912    |
| <a href="#">AMK58_03810</a> | <a href="#">no KO assigned   (GenBank) hypothetical protein</a>                                                      | Hypothetical                          | 43.797    | 44.114    | 42.028    | 134.952   | 23.308    | 90.791    |
| <a href="#">AMK58_03815</a> | <a href="#">K04771 serine protease Do [EC:3.4.21.107]   (GenBank) hypothetical protein</a>                           | Defense                               | 74.291    | 74.760    | 78.461    | 219.570   | 54.995    | 154.292   |
| <a href="#">AMK58_03820</a> | <a href="#">K02687 ribosomal protein L11 methyltransferase [EC:2.1.1.-]   (GenBank) 50S ribosomal protein L11 me</a> | Ribosome                              | 59.810    | 52.967    | 54.603    | 126.204   | 265.196   | 100.736   |
| <a href="#">AMK58_03825</a> | <a href="#">no KO assigned   (GenBank) hypothetical protein</a>                                                      | Hypothetical                          | 299.804   | 330.364   | 380.491   | 958.020   | 714.407   | 538.749   |
| <a href="#">AMK58_03830</a> | <a href="#">K01262 Xaa-Pro aminopeptidase [EC:3.4.11.9]   (GenBank) X-Pro aminopeptidase</a>                         | Peptidase                             | 163.758   | 153.148   | 133.427   | 17.329    | 37.122    | 43.670    |
| <a href="#">AMK58_03835</a> | <a href="#">K03413 two-component system, chemotaxis family, response regulator CheY   (GenBank) two-component</a>    | Chemotaxis                            | 1048.322  | 996.096   | 1074.129  | 711.668   | 394.150   | 503.066   |
| <a href="#">AMK58_03840</a> | <a href="#">no KO assigned   (GenBank) hypothetical protein</a>                                                      | Hypothetical                          | 85.608    | 87.071    | 87.308    | 80.137    | 74.805    | 139.676   |
| <a href="#">AMK58_03845</a> | <a href="#">K03414 chemotaxis protein CheZ   (GenBank) hypothetical protein</a>                                      | Chemotaxis                            | 299.898   | 302.868   | 249.580   | 96.257    | 175.372   | 243.707   |
| <a href="#">AMK58_03850</a> | <a href="#">K05807 outer membrane protein assembly factor BamD   (GenBank) transporter</a>                           | Membrane                              | 69.186    | 72.424    | 73.935    | 445.962   | 233.303   | 192.325   |
| <a href="#">AMK58_03855</a> | <a href="#">K03631 DNA repair protein RecN (Recombination protein N)   (GenBank) DNA repair protein RecN</a>         | DNA Repair and Replication            | 2.681     | 3.896     | 5.856     | 148.889   | 83.317    | 228.839   |
| <a href="#">AMK58_03860</a> | <a href="#">no KO assigned   (GenBank) hypothetical protein</a>                                                      | Hypothetical                          | 6.031     | 4.751     | 7.246     | 16.955    | 57.357    | 74.293    |
| <a href="#">AMK58_03865</a> | <a href="#">no KO assigned   (GenBank) hypothetical protein</a>                                                      | Hypothetical                          | 63.972    | 89.778    | 68.173    | 203.883   | 184.112   | 250.019   |
| <a href="#">AMK58_03870</a> | <a href="#">no KO assigned   (GenBank) hypothetical protein</a>                                                      | Hypothetical                          | 201.345   | 194.493   | 218.578   | 998.503   | 163.161   | 706.493   |
| <a href="#">AMK58_03875</a> | <a href="#">K01972 DNA ligase (NAD+) [EC:6.5.1.2]   (GenBank) aromatic ring-opening dioxygenase LigA</a>             | Energy                                | 25.959    | 40.893    | 24.682    | 16.096    | 25.076    | 43.864    |
| <a href="#">AMK58_03880</a> | <a href="#">K07216 hemerythrin   (GenBank) hypothetical protein</a>                                                  | No COG                                | 1217.424  | 1325.245  | 1317.665  | 446.316   | 703.319   | 656.454   |
| <a href="#">AMK58_03885</a> | <a href="#">K02535 UDP-3-O-[3-hydroxymyristoyl]-N-acetylglucosamine deacetylase [EC:3.5.1.108]   (GenBank) UT</a>    | Biosynthesis: Lipopolysaccharide      | 558.866   | 504.435   | 495.681   | 317.850   | 68.407    | 205.293   |
| <a href="#">AMK58_03890</a> | <a href="#">K03531 cell division protein FtsZ   (GenBank) cell division protein FtsZ</a>                             | Cell Cycle/Shape/Homeostasis          | 73.933    | 91.699    | 83.847    | 126.114   | 38.356    | 147.342   |
| <a href="#">AMK58_03895</a> | <a href="#">K03590 cell division protein FtsA   (GenBank) cell division protein FtsA</a>                             | Cell Cycle/Shape/Homeostasis          | 70.843    | 69.300    | 77.475    | 122.763   | 30.387    | 103.914   |
| <a href="#">AMK58_03900</a> | <a href="#">K03589 cell division protein FtsO   (GenBank) cell division protein</a>                                  | Cell Cycle/Shape/Homeostasis          | 51.548    | 61.594    | 59.293    | 164.544   | 32.363    | 128.358   |
| <a href="#">AMK58_03905</a> | <a href="#">K01921 D-alanine-D-alanine ligase [EC:6.3.2.4]   (GenBank) D-alanine--D-alanine ligase</a>               | Cell Wall                             | 17.315    | 22.819    | 27.478    | 216.418   | 26.045    | 96.332    |
| <a href="#">AMK58_03910</a> | <a href="#">K00075 UDP-N-acetylmuramate dehydrogenase [EC:1.3.1.98]   (GenBank) UDP-N-acetylglucosaminyl</a>         | Cell Wall                             | 114.544   | 90.517    | 102.452   | 279.758   | 58.871    | 235.803   |
| <a href="#">AMK58_03915</a> | <a href="#">K01924 UDP-N-acetylmuramate--alanine ligase [EC:6.3.2.8]   (GenBank) murC: UDP-N-acetylmuramate-</a>     | Cell Wall                             | 3.506     | 4.087     | 5.447     | 55.322    | 4.709     | 14.272    |
| <a href="#">AMK58_03920</a> | <a href="#">no KO assigned   (GenBank) hypothetical protein</a>                                                      | Hypothetical                          | 44.893    | 43.347    | 53.032    | 596.504   | 55.049    | 155.580   |
| <a href="#">AMK58_03925</a> | <a href="#">K02563 UDP-N-acetylglucosamine--N-acetylmuramyl-(pentapeptide) pyrophosphoryl-undecaprenol N-ace</a>     | Cell Wall                             | 69.990    | 60.280    | 65.032    | 170.864   | 34.859    | 161.609   |
| <a href="#">AMK58_03930</a> | <a href="#">K03588 cell division protein FtsW   (GenBank) cell division protein FtsW</a>                             | Cell Cycle/Shape/Homeostasis          | 54.457    | 57.868    | 63.546    | 205.435   | 52.865    | 164.662   |
| <a href="#">AMK58_03935</a> | <a href="#">K01925 UDP-N-acetylmuramoylalanine--D-glutamate ligase [EC:6.3.2.9]   (GenBank) UDP-N-acetylmura</a>     | Cell Wall                             | 84.856    | 82.949    | 85.683    | 41.817    | 43.232    | 164.886   |
| <a href="#">AMK58_03940</a> | <a href="#">K01000 phospho-N-acetylmuramoyl-pentapeptide-transferase [EC:2.7.8.13]   (GenBank) mraY: phospho-</a>    | Cell Wall                             | 40.024    | 47.957    | 47.807    | 198.028   | 50.878    | 110.099   |
| <a href="#">AMK58_03945</a> | <a href="#">K01929 UDP-N-acetylmuramoyl-tripeptide--D-alanyl-D-alanine ligase [EC:6.3.2.10]   (GenBank) UDP-N-</a>   | Cell Wall                             | 43.836    | 46.388    | 60.751    | 158.177   | 40.819    | 90.521    |
| <a href="#">AMK58_03950</a> | <a href="#">K01928 UDP-N-acetylmuramoyl-L-alanyl-D-glutamate--2,6-diaminopimelate ligase [EC:6.3.2.13]   (GenB</a>   | Cell Wall                             | 193.536   | 170.875   | 191.151   | 182.962   | 198.610   | 248.277   |
| <a href="#">AMK58_03955</a> | <a href="#">K03587 cell division protein FtsI (penicillin-binding protein 3)   (GenBank) penicillin-binding prot</a> | Cell Cycle/Shape/Homeostasis          | 54.504    | 54.071    | 69.989    | 68.610    | 48.153    | 43.578    |
| <a href="#">AMK58_03960</a> | <a href="#">no KO assigned   (GenBank) hypothetical protein</a>                                                      | Hypothetical                          | 61.038    | 73.730    | 85.784    | 276.565   | 128.220   | 153.714   |
| <a href="#">AMK58_03965</a> | <a href="#">K03438 16S rRNA (cytosine1402-N4)-methyltransferase [EC:2.1.1.199]   (GenBank) ribosomal RNA sm</a>      | Ribosome                              | 85.201    | 88.338    | 84.928    | 73.381    | 117.838   | 103.729   |
| <a href="#">AMK58_03970</a> | <a href="#">K03925 MraZ protein   (GenBank) MraZ family transcriptional regulator</a>                                | Transcription                         | 53707.365 | 79550.229 | 66340.871 | 33743.455 | 74991.723 | 61993.825 |
| <a href="#">AMK58_03975</a> | <a href="#">no KO assigned   (GenBank) N-acetylmuramoyl-L-alanine amidase</a>                                        | Cell Wall                             | 21.116    | 31.539    | 24.287    | 142.112   | 64.123    | 234.645   |
| <a href="#">AMK58_03980</a> | <a href="#">K15268 O-acetylserine/cysteine efflux transporter   (GenBank) multidrug DMT transporter permease</a>     | Transport                             | 23.554    | 25.511    | 24.098    | 80.078    | 51.867    | 114.058   |
| <a href="#">AMK58_03985</a> | <a href="#">K15738 ATP-binding cassette, subfamily F, uup   (GenBank) elongation factor 3</a>                        | Transport                             | 61.962    | 61.368    | 68.051    | 172.661   | 210.136   | 135.314   |
| <a href="#">AMK58_03990</a> | <a href="#">K05801 DnaJ like chaperone protein   (GenBank) molecular chaperone DjaA</a>                              | Chaperone                             | 141.090   | 152.904   | 194.361   | 314.043   | 1645.289  | 252.379   |
| <a href="#">AMK58_03995</a> | <a href="#">no KO assigned   (GenBank) GCN5 family acetyltransferase</a>                                             | Acetyltransferase                     | 0.436     | 2.607     | 3.111     | 256.867   | 19.862    | 215.234   |
| <a href="#">AMK58_04000</a> | <a href="#">K01469 5-oxoprolinase (ATP-hydrolyzing) [EC:3.5.2.9]   (GenBank) 5-oxoprolinase</a>                      | Metabolism: Amino Acid                | 108.226   | 98.812    | 109.920   | 178.499   | 117.276   | 146.084   |
| <a href="#">AMK58_04005</a> | <a href="#">K00102 D-lactate dehydrogenase (cytochrome) [EC:1.1.2.4]   (GenBank) lactate dehydrogenase</a>           | Metabolism: Carbohydrate              | 371.417   | 348.282   | 380.204   | 175.239   | 145.011   | 228.538   |
| <a href="#">AMK58_04010</a> | <a href="#">K00020 3-hydroxyisobutyrate dehydrogenase [EC:1.1.1.31]   (GenBank) oxidoreductase</a>                   | Metabolism: Amino Acid                | 67.126    | 63.970    | 65.652    | 131.845   | 52.154    | 157.967   |
| <a href="#">AMK58_04015</a> | <a href="#">no KO assigned   (GenBank) hypothetical protein</a>                                                      | Hypothetical                          | 886.309   | 1111.650  | 883.077   | 165.696   | 213.272   | 355.278   |

|                             |                                                                                                                      |                                       |          |          |          |         |          |         |
|-----------------------------|----------------------------------------------------------------------------------------------------------------------|---------------------------------------|----------|----------|----------|---------|----------|---------|
| <a href="#">AMK58_04020</a> | <a href="#">no KO assigned   (GenBank) hypothetical protein</a>                                                      | Hypothetical                          | 40.358   | 30.618   | 64.564   | 155.321 | 479.566  | 258.398 |
| <a href="#">AMK58_04025</a> | <a href="#">no KO assigned   (GenBank) histidine kinase</a>                                                          | Signal Transduction                   | 79.583   | 99.563   | 98.735   | 217.463 | 131.569  | 170.086 |
| <a href="#">AMK58_04030</a> | <a href="#">no KO assigned   (GenBank) alkylhydroperoxidase</a>                                                      | Defense                               | 94.066   | 90.883   | 81.764   | 177.157 | 140.630  | 217.918 |
| <a href="#">AMK58_04035</a> | <a href="#">no KO assigned   (GenBank) hypothetical protein</a>                                                      | Hypothetical                          | 12.868   | 13.978   | 16.128   | 228.392 | 65.746   | 89.490  |
| <a href="#">AMK58_04040</a> | <a href="#">K14232 tRNA Pro   (GenBank) tRNA-Pro</a>                                                                 | tRNA synthesis/modification           | 37.738   | 28.183   | 25.416   | 58.977  | 28.279   | 533.645 |
| <a href="#">AMK58_04045</a> | <a href="#">K14232 tRNA Pro   (GenBank) tRNA-Pro</a>                                                                 | tRNA synthesis/modification           | 75.475   | 206.673  | 100.168  | 227.481 | 121.954  | 704.237 |
| <a href="#">AMK58_04050</a> | <a href="#">K02523 octaprenyl-diphosphate synthase [EC:2.5.1.90]   (GenBank) farnesyltransferase</a>                 | Biosynthesis: Terpenoids              | 230.721  | 259.611  | 193.110  | 209.869 | 409.216  | 242.313 |
| <a href="#">AMK58_04055</a> | <a href="#">no KO assigned   (GenBank) hypothetical protein</a>                                                      | Hypothetical                          | 114.348  | 100.466  | 120.981  | 102.117 | 158.775  | 316.538 |
| <a href="#">AMK58_04060</a> | <a href="#">no KO assigned   (GenBank) methyltransferase</a>                                                         | Methyltransferase                     | 19.854   | 23.334   | 22.745   | 183.767 | 43.535   | 70.018  |
| <a href="#">AMK58_04065</a> | <a href="#">no KO assigned   (GenBank) peptidase S49</a>                                                             | Peptidase                             | 97.246   | 110.273  | 109.225  | 174.548 | 176.348  | 192.608 |
| <a href="#">AMK58_04070</a> | <a href="#">no KO assigned   (GenBank) hypothetical protein</a>                                                      | Hypothetical                          | 89.213   | 88.833   | 77.251   | 93.186  | 158.178  | 82.233  |
| <a href="#">AMK58_04075</a> | <a href="#">no KO assigned   (GenBank) hypothetical protein</a>                                                      | Hypothetical                          | 36.771   | 32.149   | 26.008   | 505.780 | 123.492  | 104.369 |
| <a href="#">AMK58_04080</a> | <a href="#">K01878 glycyl-tRNA synthetase alpha chain [EC:6.1.1.14]   (GenBank) glycine-tRNA ligase subunit alp</a>  | tRNA synthesis/modification           | 189.793  | 171.064  | 153.103  | 185.199 | 139.312  | 164.612 |
| <a href="#">AMK58_04085</a> | <a href="#">K01879 glycyl-tRNA synthetase beta chain [EC:6.1.1.14]   (GenBank) glycine-tRNA ligase subunit beta</a>  | tRNA synthesis/modification           | 127.453  | 123.331  | 122.121  | 231.783 | 84.472   | 203.677 |
| <a href="#">AMK58_04090</a> | <a href="#">K01649 2-isopropylmalate synthase [EC:2.3.3.13]   (GenBank) 2-isopropylmalate synthase</a>               | Metabolism                            | 141.645  | 110.566  | 141.242  | 161.614 | 524.451  | 245.330 |
| <a href="#">AMK58_04095</a> | <a href="#">no KO assigned   (GenBank) hypothetical protein</a>                                                      | Hypothetical                          | 26.124   | 19.009   | 21.177   | 253.710 | 88.846   | 166.463 |
| <a href="#">AMK58_04100</a> | <a href="#">no KO assigned   (GenBank) murein hydrolase transporter LrgA</a>                                         | Membrane                              | 18.403   | 11.574   | 27.629   | 235.710 | 154.239  | 133.526 |
| <a href="#">AMK58_04105</a> | <a href="#">no KO assigned   (GenBank) diene lactone hydrolase</a>                                                   | Hydrolase                             | 2.385    | 4.384    | 6.802    | 344.276 | 214.037  | 182.353 |
| <a href="#">AMK58_04110</a> | <a href="#">no KO assigned   (GenBank) hypothetical protein</a>                                                      | Hypothetical                          | 2.505    | 0.000    | 5.293    | 73.450  | 600.687  | 185.826 |
| <a href="#">AMK58_04115</a> | <a href="#">no KO assigned   (GenBank) hypothetical protein</a>                                                      | Hypothetical                          | 1.805    | 0.000    | 1.872    | 114.277 | 142.179  | 58.265  |
| <a href="#">AMK58_04120</a> | <a href="#">no KO assigned   (GenBank) alcohol dehydrogenase</a>                                                     | Dehydrogenase                         | 1.853    | 1.845    | 4.699    | 138.465 | 205.413  | 183.966 |
| <a href="#">AMK58_04125</a> | <a href="#">no KO assigned   (GenBank) hypothetical protein</a>                                                      | Hypothetical                          | 2.374    | 0.000    | 4.514    | 252.501 | 140.363  | 243.031 |
| <a href="#">AMK58_04130</a> | <a href="#">K01236 maltotriose-6-phosphatase [EC:3.2.1.141]   (GenBank) malto-oligosyltrehalose tr</a>               | Metabolism: Carbohydrate              | 1.267    | 1.514    | 3.735    | 244.255 | 73.067   | 164.791 |
| <a href="#">AMK58_04135</a> | <a href="#">no KO assigned   (GenBank) glycogen debranching protein</a>                                              | Metabolism: Carbohydrate              | 1.234    | 2.808    | 4.413    | 234.426 | 97.464   | 158.735 |
| <a href="#">AMK58_04140</a> | <a href="#">no KO assigned   (GenBank) hypothetical protein</a>                                                      | Hypothetical                          | 197.673  | 224.511  | 223.190  | 180.942 | 162.479  | 232.940 |
| <a href="#">AMK58_04145</a> | <a href="#">no KO assigned   (GenBank) hypothetical protein</a>                                                      | Hypothetical                          | 794.076  | 1257.726 | 1026.391 | 182.642 | 255.430  | 333.438 |
| <a href="#">AMK58_04150</a> | <a href="#">no KO assigned   (GenBank) hypothetical protein</a>                                                      | Hypothetical                          | 433.686  | 442.709  | 460.790  | 143.131 | 283.342  | 272.392 |
| <a href="#">AMK58_04155</a> | <a href="#">no KO assigned   (GenBank) hypothetical protein</a>                                                      | Hypothetical                          | 72.062   | 61.504   | 61.154   | 209.780 | 188.421  | 203.251 |
| <a href="#">AMK58_04160</a> | <a href="#">no KO assigned   (GenBank) hypothetical protein</a>                                                      | Hypothetical                          | 5.765    | 2.460    | 10.181   | 169.357 | 1551.648 | 360.103 |
| <a href="#">AMK58_04165</a> | <a href="#">no KO assigned   (GenBank) hypothetical protein</a>                                                      | Hypothetical                          | 28.975   | 29.676   | 32.666   | 123.649 | 1943.457 | 265.609 |
| <a href="#">AMK58_04170</a> | <a href="#">no KO assigned   (GenBank) peptidoglycan-binding protein</a>                                             | Cell Wall                             | 123.431  | 130.239  | 120.814  | 213.486 | 133.003  | 158.161 |
| <a href="#">AMK58_04175</a> | <a href="#">no KO assigned   (GenBank) hypothetical protein</a>                                                      | Hypothetical                          | 104.039  | 75.122   | 90.822   | 196.959 | 62.462   | 195.767 |
| <a href="#">AMK58_04180</a> | <a href="#">no KO assigned   (GenBank) hypothetical protein</a>                                                      | Hypothetical                          | 30.681   | 30.755   | 36.415   | 181.218 | 999.405  | 274.564 |
| <a href="#">AMK58_04185</a> | <a href="#">no KO assigned   (GenBank) pseudogene</a>                                                                | Pseudogene                            | 435.514  | 537.880  | 556.619  | 83.172  | 106.681  | 252.504 |
| <a href="#">AMK58_04190</a> | <a href="#">K03406 methyl-accepting chemotaxis protein   (GenBank) chemotaxis protein</a>                            | Chemotaxis                            | 70.826   | 63.546   | 73.958   | 140.082 | 24.470   | 124.575 |
| <a href="#">AMK58_04195</a> | <a href="#">no KO assigned   (GenBank) hypothetical protein</a>                                                      | Hypothetical                          | 22.460   | 29.354   | 26.027   | 127.868 | 75.344   | 127.239 |
| <a href="#">AMK58_04200</a> | <a href="#">no KO assigned   (GenBank) hypothetical protein</a>                                                      | Hypothetical                          | 4.387    | 6.552    | 10.219   | 172.763 | 128.697  | 189.150 |
| <a href="#">AMK58_04205</a> | <a href="#">no KO assigned   (GenBank) hypothetical protein</a>                                                      | Hypothetical                          | 65.499   | 64.726   | 63.536   | 166.728 | 51.035   | 193.558 |
| <a href="#">AMK58_04210</a> | <a href="#">K02030 polar amino acid transport system substrate-binding protein   (GenBank) amino acid ABC transp</a> | Transport: Amino Acid                 | 19.625   | 17.966   | 20.616   | 170.878 | 24.016   | 156.297 |
| <a href="#">AMK58_04215</a> | <a href="#">K03786 3-dehydroquininate dehydratase II [EC:4.2.1.10]   (GenBank) 3-dehydroquininate dehydratase</a>    | Biosynthesis: Amino Acid              | 537.006  | 424.656  | 403.489  | 69.393  | 201.770  | 211.693 |
| <a href="#">AMK58_04220</a> | <a href="#">K02160 acetyl-CoA carboxylase biotin carboxyl carrier protein   (GenBank) acetyl-CoA carboxylase bio</a> | Metabolism: Lipid                     | 141.792  | 139.849  | 129.445  | 58.027  | 67.744   | 49.648  |
| <a href="#">AMK58_04225</a> | <a href="#">K01961 acetyl-CoA carboxylase, biotin carboxylase subunit [EC:6.4.1.2 6.3.4.14]   (GenBank) acetyl-C</a> | Metabolism: Lipid                     | 234.853  | 226.049  | 206.769  | 169.547 | 97.108   | 209.754 |
| <a href="#">AMK58_04230</a> | <a href="#">K01166 ribonuclease T2 [EC:3.1.27.1]   (GenBank) ribonuclease T</a>                                      | Ribosome                              | 83.679   | 60.833   | 63.192   | 116.556 | 26.636   | 262.134 |
| <a href="#">AMK58_04235</a> | <a href="#">K00684 leucyl/phenylalanyl-tRNA--protein transferase [EC:2.3.2.6]   (GenBank) leucyl/phenylalanyl-tR</a> | tRNA synthesis/modification           | 31.495   | 40.562   | 40.345   | 212.964 | 39.005   | 270.706 |
| <a href="#">AMK58_04240</a> | <a href="#">no KO assigned   (GenBank) glycosyl hydrolase family 5</a>                                               | Hydrolase                             | 132.458  | 152.502  | 118.727  | 236.117 | 100.034  | 282.114 |
| <a href="#">AMK58_04245</a> | <a href="#">no KO assigned   (GenBank) hypothetical protein</a>                                                      | Hypothetical                          | 15.246   | 24.112   | 31.977   | 87.100  | 114.923  | 150.109 |
| <a href="#">AMK58_04250</a> | <a href="#">K03694 ATP-dependent Clp protease ATP-binding subunit ClpA   (GenBank) clpA: ATP-dependent Clp r</a>     | Chaperone                             | 906.649  | 1028.814 | 928.159  | 66.947  | 3409.851 | 244.366 |
| <a href="#">AMK58_04255</a> | <a href="#">K06891 ATP-dependent Clp protease adaptor protein ClpS   (GenBank) ATP-dependent Clp protease adap</a>   | Chaperone                             | 1396.248 | 1586.073 | 1119.153 | 50.590  | 3900.506 | 293.892 |
| <a href="#">AMK58_04260</a> | <a href="#">no KO assigned   (GenBank) hypothetical protein</a>                                                      | Hypothetical                          | 47.583   | 44.652   | 56.138   | 88.768  | 182.858  | 240.248 |
| <a href="#">AMK58_04265</a> | <a href="#">no KO assigned   (GenBank) hypothetical protein</a>                                                      | Hypothetical                          | 518.119  | 645.228  | 618.684  | 155.843 | 361.901  | 244.401 |
| <a href="#">AMK58_04270</a> | <a href="#">K07395 putative proteasome-type protease   (GenBank) peptidase</a>                                       | No COG                                | 101.531  | 94.929   | 92.156   | 80.667  | 161.990  | 231.169 |
| <a href="#">AMK58_04275</a> | <a href="#">no KO assigned   (GenBank) hypothetical protein</a>                                                      | Hypothetical                          | 51.171   | 50.043   | 59.080   | 182.383 | 637.498  | 128.086 |
| <a href="#">AMK58_04280</a> | <a href="#">K01286 D-alanyl-D-alanine carboxypeptidase [EC:3.4.16.4]   (GenBank) D-alanyl-D-alanine carboxypepti</a> | Cell Wall                             | 88.086   | 110.076  | 91.428   | 253.386 | 45.266   | 161.733 |
| <a href="#">AMK58_04285</a> | <a href="#">K05772 tungstate transport system substrate-binding protein   (GenBank) sulfate transporter</a>          | Transport: Organic                    | 524.512  | 436.268  | 461.580  | 135.155 | 121.081  | 208.251 |
| <a href="#">AMK58_04290</a> | <a href="#">K05773 tungstate transport system permease protein   (GenBank) ABC transporter permease</a>              | Transport: Organic                    | 16.700   | 23.904   | 17.863   | 307.128 | 26.397   | 300.838 |
| <a href="#">AMK58_04295</a> | <a href="#">K02379 FdhD protein   (GenBank) formate dehydrogenase family accessory protein FdhD</a>                  | Biosynthesis: Co-Factors and Vitamins | 155.393  | 141.063  | 137.046  | 106.285 | 192.876  | 127.799 |
| <a href="#">AMK58_04300</a> | <a href="#">K03752 molybdopterin-guanine dinucleotide biosynthesis protein A [EC:2.7.7.77]   (GenBank) molybdenu</a> | Biosynthesis: Co-Factors and Vitamins | 67.972   | 74.989   | 71.789   | 145.631 | 63.163   | 73.593  |
| <a href="#">AMK58_04305</a> | <a href="#">no KO assigned   (GenBank) hypothetical protein</a>                                                      | Hypothetical                          | 93.680   | 103.754  | 128.375  | 258.187 | 105.025  | 203.900 |
| <a href="#">AMK58_04310</a> | <a href="#">no KO assigned   (GenBank) hypothetical protein</a>                                                      | Hypothetical                          | 68.821   | 78.681   | 80.785   | 212.549 | 111.740  | 286.189 |
| <a href="#">AMK58_04315</a> | <a href="#">no KO assigned   (GenBank) molecular chaperone TorD</a>                                                  | Chaperone                             | 111.974  | 118.195  | 193.370  | 164.041 | 396.938  | 186.749 |
| <a href="#">AMK58_04320</a> | <a href="#">no KO assigned   (GenBank) formate dehydrogenase</a>                                                     | Metabolism: Carbon                    | 194.563  | 136.754  | 176.974  | 117.000 | 504.425  | 77.639  |
| <a href="#">AMK58_04325</a> | <a href="#">K00123 formate dehydrogenase major subunit [EC:1.2.1.21]   (GenBank) formate dehydrogenase</a>           | Metabolism: Carbon                    | 143.789  | 125.692  | 179.472  | 148.881 | 163.415  | 215.990 |
| <a href="#">AMK58_04330</a> | <a href="#">K00124 formate dehydrogenase iron-sulfur subunit   (GenBank) formate dehydrogenase</a>                   | Metabolism: Carbon                    | 107.487  | 71.487   | 138.066  | 92.639  | 114.665  | 187.304 |
| <a href="#">AMK58_04335</a> | <a href="#">no KO assigned   (GenBank) hypothetical protein</a>                                                      | Hypothetical                          | 57.743   | 59.352   | 90.914   | 143.056 | 53.739   | 147.966 |
| <a href="#">AMK58_04340</a> | <a href="#">K00127 formate dehydrogenase subunit gamma   (GenBank) formate dehydrogenase</a>                         | Metabolism: Carbon                    | 65.799   | 55.962   | 92.689   | 172.565 | 103.467  | 190.226 |
| <a href="#">AMK58_04345</a> | <a href="#">no KO assigned   (GenBank) hypothetical protein</a>                                                      | Hypothetical                          | 26.265   | 24.877   | 34.718   | 283.182 | 108.371  | 196.323 |
| <a href="#">AMK58_04350</a> | <a href="#">no KO assigned   (GenBank) hypothetical protein</a>                                                      | Hypothetical                          | 6.534    | 6.889    | 12.547   | 269.452 | 50.117   | 188.898 |



|                             |                                                                                                                    |                                     |          |          |          |         |          |          |
|-----------------------------|--------------------------------------------------------------------------------------------------------------------|-------------------------------------|----------|----------|----------|---------|----------|----------|
| <a href="#">AMK58_04355</a> | <a href="#">K01628 L-fuculose-phosphate aldolase [EC:4.1.2.17] (GenBank) fuculose phosphate aldolase</a>           | Metabolism: Carbohydrate            | 21.651   | 22.767   | 23.057   | 127.382 | 42.833   | 175.873  |
| <a href="#">AMK58_04360</a> | <a href="#">no KO assigned (GenBank) histidine kinase</a>                                                          | Signal Transduction                 | 69.752   | 73.172   | 79.629   | 166.483 | 32.122   | 93.288   |
| <a href="#">AMK58_04365</a> | <a href="#">K15777 4,5-DOPA dioxygenase extradiol [EC:1.13.11.-] (GenBank) extradiol ring-cleavage dioxygenase</a> | Oxidoreductase                      | 19.801   | 20.771   | 24.001   | 287.318 | 14.952   | 135.957  |
| <a href="#">AMK58_04370</a> | <a href="#">K02109 F-type H+-transporting ATPase subunit b (GenBank) ATP synthase subunit B</a>                    | Energy                              | 633.120  | 610.331  | 654.739  | 307.477 | 300.539  | 140.805  |
| <a href="#">AMK58_04375</a> | <a href="#">K02109 F-type H+-transporting ATPase subunit b (GenBank) ATPase</a>                                    | Energy                              | 999.843  | 950.029  | 934.214  | 153.466 | 473.086  | 124.687  |
| <a href="#">AMK58_04380</a> | <a href="#">K02110 F-type H+-transporting ATPase subunit c (GenBank) ATP synthase subunit C</a>                    | Energy                              | 7229.510 | 7657.924 | 6950.114 | 59.829  | 2837.997 | 150.192  |
| <a href="#">AMK58_04385</a> | <a href="#">K02108 F-type H+-transporting ATPase subunit a (GenBank) ATP synthase F0F1 subunit A</a>               | Energy                              | 1696.023 | 1219.204 | 1300.194 | 120.331 | 1411.967 | 325.039  |
| <a href="#">AMK58_04390</a> | <a href="#">K02116 ATP synthase protein 1 (GenBank) phosphoribosylaminoimidazolecarboxamide formyltransferase</a>  | Energy                              | 865.201  | 838.933  | 807.101  | 145.655 | 883.668  | 231.344  |
| <a href="#">AMK58_04395</a> | <a href="#">K07152 protein SCO1/2 (GenBank) electron transporter SenC</a>                                          | Energy                              | 177.094  | 257.913  | 218.974  | 84.993  | 217.117  | 165.891  |
| <a href="#">AMK58_04400</a> | <a href="#">no KO assigned (GenBank) hypothetical protein</a>                                                      | Hypothetical                        | 57.810   | 68.426   | 76.227   | 369.667 | 28.199   | 190.150  |
| <a href="#">AMK58_04405</a> | <a href="#">K03406 methyl-accepting chemotaxis protein (GenBank) chemotaxis protein</a>                            | Chemotaxis                          | 109.955  | 125.112  | 137.069  | 151.071 | 13.451   | 188.634  |
| <a href="#">AMK58_04410</a> | <a href="#">K06217 phosphate starvation-inducible protein PhoH and related proteins (GenBank) phosphate starva</a> | Starvation                          | 139.613  | 154.865  | 163.007  | 145.704 | 41.492   | 269.721  |
| <a href="#">AMK58_04415</a> | <a href="#">K03610 septum site-determining protein MinC (GenBank) septum site-determining protein MinC</a>         | Cell Cycle/Shape/Homeostasis        | 209.992  | 244.000  | 227.333  | 127.078 | 270.198  | 190.396  |
| <a href="#">AMK58_04420</a> | <a href="#">K03609 septum site-determining protein MinD (GenBank) septum site-determining protein MinD</a>         | Cell Cycle/Shape/Homeostasis        | 820.964  | 729.561  | 802.870  | 155.627 | 260.845  | 257.147  |
| <a href="#">AMK58_04425</a> | <a href="#">K03608 cell division topological specificity factor (GenBank) cell division topological specificit</a> | Cell Cycle/Shape/Homeostasis        | 221.053  | 231.985  | 299.426  | 189.217 | 118.910  | 186.549  |
| <a href="#">AMK58_04430</a> | <a href="#">no KO assigned (GenBank) hypothetical protein</a>                                                      | Hypothetical                        | 228.611  | 311.702  | 267.463  | 254.137 | 367.568  | 143.216  |
| <a href="#">AMK58_04435</a> | <a href="#">no KO assigned (GenBank) chemotaxis protein</a>                                                        | Chemotaxis                          | 224.727  | 220.037  | 166.283  | 72.969  | 172.038  | 180.163  |
| <a href="#">AMK58_04440</a> | <a href="#">no KO assigned (GenBank) chemotaxis protein</a>                                                        | Chemotaxis                          | 66.402   | 60.693   | 52.510   | 188.536 | 73.704   | 171.273  |
| <a href="#">AMK58_04445</a> | <a href="#">no KO assigned (GenBank) chemotaxis protein</a>                                                        | Chemotaxis                          | 24.718   | 26.138   | 24.126   | 141.528 | 65.158   | 176.771  |
| <a href="#">AMK58_04450</a> | <a href="#">K19802 L-Ala-D/L-Glu epimerase [EC:5.1.1.20] (GenBank) mandelate racemase</a>                          | Metabolism: Amino Acid              | 188.720  | 258.496  | 206.730  | 223.229 | 646.409  | 164.640  |
| <a href="#">AMK58_04455</a> | <a href="#">K11312 cupin 2 domain-containing protein (GenBank) cupin</a>                                           | No COG                              | 29.236   | 43.667   | 37.467   | 168.145 | 132.878  | 49.799   |
| <a href="#">AMK58_04460</a> | <a href="#">no KO assigned (GenBank) aminotransferase class V</a>                                                  | tRNA synthesis/modification         | 73.168   | 78.769   | 94.354   | 242.807 | 191.187  | 175.357  |
| <a href="#">AMK58_04465</a> | <a href="#">no KO assigned (GenBank) hypothetical protein</a>                                                      | Hypothetical                        | 58.443   | 66.537   | 77.329   | 269.762 | 199.833  | 200.949  |
| <a href="#">AMK58_04470</a> | <a href="#">K01724 4a-hydroxytetrahydrobiopterin dehydratase [EC:4.2.1.96] (GenBank) pterin-4-alpha-carbinolam</a> | Biosynthesis                        | 397.258  | 399.465  | 372.848  | 163.413 | 545.388  | 275.926  |
| <a href="#">AMK58_04475</a> | <a href="#">K02334 DNA polymerase bacteriophage-type [EC:2.7.7.7] (GenBank) DNA polymerase</a>                     | DNA Repair and Replication          | 23.366   | 35.810   | 23.366   | 238.997 | 103.754  | 193.415  |
| <a href="#">AMK58_04480</a> | <a href="#">K00845 glucokinase [EC:2.7.1.2] (GenBank) glucokinase</a>                                              | Metabolism: Carbohydrate            | 57.247   | 64.546   | 73.440   | 178.488 | 95.056   | 132.881  |
| <a href="#">AMK58_04485</a> | <a href="#">K00697 trehalose 6-phosphate synthase [EC:2.4.1.15] (GenBank) alpha.alpha-trehalose-phosphate svnt</a> | Metabolism: Carbohydrate            | 17.494   | 19.145   | 26.268   | 103.019 | 303.143  | 230.562  |
| <a href="#">AMK58_04490</a> | <a href="#">no KO assigned (GenBank) N-formylglutamate amidohydrolase</a>                                          | Cell Wall                           | 32.094   | 33.740   | 39.421   | 212.189 | 160.401  | 286.102  |
| <a href="#">AMK58_04495</a> | <a href="#">K14237 tRNA Val (GenBank) tRNA-Val</a>                                                                 | tRNA synthesis/modification         | 69.416   | 125.382  | 101.305  | 285.447 | 132.464  | 1739.431 |
| <a href="#">AMK58_04500</a> | <a href="#">K03406 methyl-accepting chemotaxis protein (GenBank) chemotaxis protein</a>                            | Chemotaxis                          | 5.274    | 4.312    | 8.129    | 137.126 | 44.179   | 185.520  |
| <a href="#">AMK58_04505</a> | <a href="#">no KO assigned (GenBank) chemotaxis protein</a>                                                        | Chemotaxis                          | 4.126    | 4.622    | 8.214    | 178.940 | 23.552   | 174.741  |
| <a href="#">AMK58_04510</a> | <a href="#">K01638 malate synthase [EC:2.3.3.9] (GenBank) malate synthase G</a>                                    | Metabolism: Carbon                  | 202.516  | 171.847  | 188.261  | 161.514 | 80.453   | 171.454  |
| <a href="#">AMK58_04515</a> | <a href="#">K03581 exodeoxyribonuclease V alpha subunit [EC:3.1.11.5] (GenBank) recombinase RecD</a>               | DNA Repair and Replication          | 12.881   | 19.157   | 19.344   | 206.250 | 60.092   | 212.390  |
| <a href="#">AMK58_04520</a> | <a href="#">K03704 cold shock protein (beta-ribbon, CspA family) (GenBank) cold-shock protein</a>                  | Stress Response                     | 3863.856 | 4044.377 | 3878.128 | 95.607  | 464.817  | 155.776  |
| <a href="#">AMK58_04525</a> | <a href="#">no KO assigned (GenBank) transcriptional regulator</a>                                                 | Transcription                       | 113.706  | 107.053  | 145.849  | 262.683 | 56.470   | 283.392  |
| <a href="#">AMK58_04530</a> | <a href="#">no KO assigned (GenBank) histidine kinase</a>                                                          | Signal Transduction                 | 133.052  | 161.554  | 156.657  | 164.905 | 84.248   | 136.892  |
| <a href="#">AMK58_04535</a> | <a href="#">K03406 methyl-accepting chemotaxis protein (GenBank) chemotaxis protein</a>                            | Chemotaxis                          | 20.605   | 24.693   | 23.001   | 130.188 | 119.013  | 185.594  |
| <a href="#">AMK58_04540</a> | <a href="#">no KO assigned (GenBank) hypothetical protein</a>                                                      | Hypothetical                        | 305.512  | 166.372  | 227.552  | 166.511 | 665.496  | 328.576  |
| <a href="#">AMK58_04545</a> | <a href="#">K03855 ferredoxin like protein (GenBank) ferredoxin</a>                                                | Ferredoxin                          | 5.948    | 12.690   | 6.463    | 63.736  | 27.696   | 197.358  |
| <a href="#">AMK58_04550</a> | <a href="#">K00313 electron transfer flavoprotein-quinone oxidoreductase [EC:1.5.5.-] (GenBank) nitrogen fixat</a> | Nitrogen                            | 7.811    | 7.778    | 9.372    | 103.141 | 45.573   | 218.072  |
| <a href="#">AMK58_04555</a> | <a href="#">K03522 electron transfer flavoprotein alpha subunit (GenBank) electron transfer flavoprotein subun</a> | Energy                              | 3.251    | 4.019    | 5.223    | 188.616 | 27.597   | 199.071  |
| <a href="#">AMK58_04560</a> | <a href="#">K03521 electron transfer flavoprotein beta subunit (GenBank) nitrogen fixation protein FixA</a>        | Nitrogen                            | 3.979    | 2.547    | 5.945    | 147.719 | 17.092   | 202.665  |
| <a href="#">AMK58_04565</a> | <a href="#">K02595 nitrogenase-stabilizing/protective protein (GenBank) nitrogen fixation protein NifW</a>         | Nitrogen                            | 19.805   | 15.628   | 19.186   | 152.675 | 31.083   | 237.360  |
| <a href="#">AMK58_04570</a> | <a href="#">K00640 serine O-acetyltransferase [EC:2.3.1.30] (GenBank) serine acetyltransferase</a>                 | Metabolism                          | 3.147    | 9.808    | 7.024    | 275.808 | 18.915   | 160.476  |
| <a href="#">AMK58_04575</a> | <a href="#">K02594 homocitrate synthase NifV [EC:2.3.3.14] (GenBank) homocitrate synthase</a>                      | Metabolism: Carbohydrate            | 3.064    | 2.525    | 5.123    | 214.691 | 16.507   | 143.423  |
| <a href="#">AMK58_04580</a> | <a href="#">K04487 cysteine desulfurase [EC:2.8.1.7] (GenBank) cysteine desulfurase NifS</a>                       | Metabolism: Co-Factors and Vitamins | 6.425    | 7.797    | 11.168   | 179.669 | 20.538   | 144.666  |
| <a href="#">AMK58_04585</a> | <a href="#">K13819 NifU-like protein (GenBank) nitrogen fixation protein NifU</a>                                  | Nitrogen                            | 1.846    | 3.152    | 3.260    | 159.889 | 24.313   | 162.045  |
| <a href="#">AMK58_04590</a> | <a href="#">no KO assigned (GenBank) hypothetical protein</a>                                                      | Hypothetical                        | 0.953    | 5.696    | 2.115    | 248.600 | 9.287    | 60.408   |
| <a href="#">AMK58_04595</a> | <a href="#">no KO assigned (GenBank) hypothetical protein</a>                                                      | Hypothetical                        | 3.161    | 2.905    | 9.015    | 336.747 | 12.024   | 201.093  |
| <a href="#">AMK58_04600</a> | <a href="#">K15790 nitrogen fixation protein NifO (GenBank) hypothetical protein</a>                               | Nitrogen                            | 2.868    | 7.344    | 7.597    | 270.035 | 18.652   | 274.690  |
| <a href="#">AMK58_04605</a> | <a href="#">no KO assigned (GenBank) ferredoxin</a>                                                                | Ferredoxin                          | 3.295    | 7.381    | 7.831    | 99.849  | 29.163   | 277.237  |
| <a href="#">AMK58_04610</a> | <a href="#">no KO assigned (GenBank) hypothetical protein</a>                                                      | Hypothetical                        | 4.679    | 10.483   | 17.240   | 345.526 | 51.281   | 379.114  |
| <a href="#">AMK58_04615</a> | <a href="#">no KO assigned (GenBank) hypothetical protein</a>                                                      | Hypothetical                        | 7.291    | 12.445   | 5.694    | 95.219  | 34.243   | 160.075  |
| <a href="#">AMK58_04620</a> | <a href="#">K02596 nitrogen fixation protein NifX (GenBank) nitrogen fixation protein NifX</a>                     | Nitrogen                            | 0.904    | 0.000    | 3.723    | 138.382 | 23.698   | 249.674  |
| <a href="#">AMK58_04625</a> | <a href="#">K02592 nitrogenase molybdenum-iron protein NifN (GenBank) nitrogen fixation protein NifN</a>           | Nitrogen                            | 0.778    | 2.582    | 4.355    | 182.329 | 20.594   | 213.961  |
| <a href="#">AMK58_04630</a> | <a href="#">K02587 nitrogenase molybdenum-cofactor synthesis protein NifE (GenBank) nitrogen fixation protein</a>  | Nitrogen                            | 4.788    | 3.576    | 6.829    | 143.287 | 25.566   | 204.004  |
| <a href="#">AMK58_04635</a> | <a href="#">K03406 methyl-accepting chemotaxis protein (GenBank) chemotaxis protein</a>                            | Chemotaxis                          | 131.897  | 118.129  | 135.621  | 121.857 | 40.517   | 217.296  |
| <a href="#">AMK58_04640</a> | <a href="#">K03885 NADH dehydrogenase [EC:1.6.99.3] (GenBank) pyridine nucleotide-disulfide oxidoreductase</a>     | Energy                              | 7.911    | 8.376    | 8.379    | 170.235 | 19.812   | 134.185  |
| <a href="#">AMK58_04645</a> | <a href="#">no KO assigned (GenBank) transcriptional regulator</a>                                                 | Transcription                       | 44.919   | 39.505   | 51.164   | 161.575 | 56.641   | 254.562  |
| <a href="#">AMK58_04650</a> | <a href="#">K02591 nitrogenase molybdenum-iron protein beta chain [EC:1.18.6.1] (GenBank) nitrogenase molybden</a> | Nitrogen                            | 19.325   | 19.011   | 23.467   | 81.613  | 63.772   | 235.119  |
| <a href="#">AMK58_04655</a> | <a href="#">K02586 nitrogenase molybdenum-iron protein alpha chain [EC:1.18.6.1] (GenBank) nitrogenase molybde</a> | Nitrogen                            | 15.639   | 16.577   | 17.907   | 49.895  | 59.824   | 215.417  |
| <a href="#">AMK58_04660</a> | <a href="#">K02588 nitrogenase iron protein NifH [EC:1.18.6.1] (GenBank) nifH: nitrogenase reductase</a>           | Nitrogen                            | 7.962    | 10.662   | 10.964   | 73.554  | 34.663   | 240.705  |
| <a href="#">AMK58_04665</a> | <a href="#">no KO assigned (GenBank) hypothetical protein</a>                                                      | Hypothetical                        | 70.468   | 79.109   | 93.561   | 148.215 | 34.762   | 72.155   |
| <a href="#">AMK58_04670</a> | <a href="#">K05951 NAD+--dinitrogen-reductase ADP-D-ribosyltransferase [EC:2.4.2.37] (GenBank) NAD(+)-dir</a>      | Nitrogen                            | 3.000    | 4.073    | 6.886    | 146.479 | 17.931   | 272.330  |
| <a href="#">AMK58_04675</a> | <a href="#">no KO assigned (GenBank) ADP-ribosyl-(dinitrogen reductase) hydrolase</a>                              | Nitrogen                            | 1.625    | 2.427    | 6.052    | 205.907 | 15.223   | 192.767  |
| <a href="#">AMK58_04680</a> | <a href="#">no KO assigned (GenBank) hypothetical protein</a>                                                      | Hypothetical                        | 3.643    | 10.047   | 12.258   | 293.211 | 17.642   | 157.749  |
| <a href="#">AMK58_04685</a> | <a href="#">no KO assigned (GenBank) glutamine amidotransferase</a>                                                | Metabolism: Carbon                  | 86.707   | 67.815   | 74.348   | 147.403 | 121.917  | 257.869  |

|             |                                                                                                                                  |                                     |         |         |         |         |          |           |
|-------------|----------------------------------------------------------------------------------------------------------------------------------|-------------------------------------|---------|---------|---------|---------|----------|-----------|
| AMK58_04690 | K01118 FMN-dependent NADH-azoreductase [EC:1.7.-.-1] (GenBank) FMN-dependent NADH-azoreductase                                   | Energy                              | 42.869  | 48.454  | 47.737  | 250.651 | 66.419   | 287.389   |
| AMK58_04695 | no KO assigned   (GenBank) transcriptional regulator                                                                             | Transcription                       | 18.226  | 21.606  | 20.218  | 193.383 | 29.267   | 242.245   |
| AMK58_04700 | no KO assigned   (GenBank) UDP-4-amino-4-deoxy-L-arabinose-oxoglutarate aminotransferase                                         | tRNA synthesis/modification         | 13.419  | 15.911  | 16.946  | 163.284 | 17.962   | 216.751   |
| AMK58_04705 | no KO assigned   (GenBank) hypothetical protein                                                                                  | Hypothetical                        | 7.222   | 12.690  | 8.482   | 117.229 | 7.640    | 52.393    |
| AMK58_04710 | K02593 nitrogen fixation protein NifT   (GenBank) nitrogen fixation protein NifT                                                 | Nitrogen                            | 21.332  | 20.667  | 22.476  | 97.312  | 26.571   | 169.474   |
| AMK58_04715 | K04487 cysteine desulfurase [EC:2.8.1.71] (GenBank) cysteine desulfurase NifS                                                    | Metabolism: Co-Factors and Vitamins | 4.099   | 2.512   | 5.496   | 137.548 | 10.750   | 52.919    |
| AMK58_04720 | K02597 nitrogen fixation protein NifZ   (GenBank) nitrogen fixation protein NifZ                                                 | Nitrogen                            | 10.866  | 9.274   | 14.390  | 280.706 | 19.629   | 160.128   |
| AMK58_04725 | K02597 nitrogen fixation protein NifZ   (GenBank) nitrogen fixation protein NifZ                                                 | Nitrogen                            | 8.153   | 7.307   | 9.303   | 126.145 | 15.580   | 145.157   |
| AMK58_04730 | no KO assigned   (GenBank) LRV FeS4 cluster domain-containing protein                                                            | No COG                              | 1.251   | 2.804   | 2.826   | 196.970 | 7.561    | 76.152    |
| AMK58_04735 | no KO assigned   (GenBank) hypothetical protein                                                                                  | Hypothetical                        | 9.523   | 13.546  | 11.857  | 206.225 | 16.311   | 114.793   |
| AMK58_04740 | no KO assigned   (GenBank) ferredoxin                                                                                            | Ferredoxin                          | 56.123  | 41.442  | 38.373  | 119.105 | 35.441   | 271.318   |
| AMK58_04745 | K02585 nitrogen fixation protein NifB   (GenBank) nitrogen fixation protein NifB                                                 | Nitrogen                            | 3.493   | 8.346   | 4.280   | 139.106 | 23.206   | 178.120   |
| AMK58_04750 | no KO assigned   (GenBank) adenylate cyclase                                                                                     | cyclic nucleotide                   | 7.066   | 6.495   | 9.949   | 198.409 | 41.088   | 142.007   |
| AMK58_04755 | no KO assigned   (GenBank) hypothetical protein                                                                                  | Hypothetical                        | 74.036  | 87.976  | 79.209  | 153.784 | 109.580  | 191.035   |
| AMK58_04760 | K02584 Nif-specific regulatory protein   (GenBank) nif-specific transcriptional activator NifA                                   | Transcription                       | 88.131  | 106.693 | 119.103 | 101.215 | 188.632  | 174.562   |
| AMK58_04765 | no KO assigned   (GenBank) TetR family transcriptional regulator                                                                 | Transcription                       | 12.833  | 11.111  | 13.439  | 142.753 | 24.459   | 120.375   |
| AMK58_04770 | K01993 HlyD family secretion protein   (GenBank) secretion protein HlyD                                                          | Secretion System                    | 2.682   | 3.815   | 3.279   | 139.945 | 12.202   | 27.712    |
| AMK58_04775 | K01990 ABC-2 type transport system ATP-binding protein   (GenBank) multidrug ABC transporter ATP-1                               | Membrane Transport                  | 19.794  | 26.108  | 34.340  | 212.460 | 37.563   | 146.833   |
| AMK58_04780 | no KO assigned   (GenBank) hypothetical protein                                                                                  | Hypothetical                        | 208.026 | 266.603 | 340.677 | 90.103  | 58.273   | 217.542   |
| AMK58_04785 | K01992 ABC-2 type transport system permease protein   (GenBank) mannose-1-phosphate guanyltansferase                             | Membrane Transport                  | 30.749  | 29.980  | 30.150  | 154.892 | 70.087   | 193.353   |
| AMK58_04790 | K07261 penicillin-insensitive murein endopeptidase [EC:3.4.24.-] (GenBank) peptidase                                             | Cell Wall                           | 60.033  | 73.089  | 67.752  | 238.379 | 43.947   | 172.849   |
| AMK58_04795 | no KO assigned   (GenBank) phosphoethanolamine methyltransferase                                                                 | Methyltransferase                   | 110.137 | 123.939 | 113.087 | 199.238 | 124.081  | 207.985   |
| AMK58_04800 | K02919 large subunit ribosomal protein L36   (GenBank) rpmJ; 50S ribosomal protein L36                                           | Ribosome                            | 803.322 | 717.615 | 581.990 | 360.413 | 247.344  | 448.188   |
| AMK58_04805 | K00104 glycolate oxidase [EC:1.1.3.15]   (GenBank) glycolate oxidase subunit GlcD                                                | Metabolism: Carbohydrate            | 211.230 | 212.923 | 209.968 | 175.592 | 104.631  | 194.133   |
| AMK58_04810 | K11472 glycolate oxidase FAD binding subunit   (GenBank) 2-hydroxy-acid oxidase                                                  | Metabolism: Carbohydrate            | 77.321  | 95.636  | 85.786  | 169.853 | 85.276   | 106.062   |
| AMK58_04815 | K11473 glycolate oxidase iron-sulfur subunit   (GenBank) 2-hydroxy-acid oxidase                                                  | Metabolism: Carbohydrate            | 104.896 | 105.791 | 89.907  | 124.619 | 134.376  | 108.186   |
| AMK58_04820 | K01004 phosphatidylcholine synthase [EC:2.7.8.24]   (GenBank) phosphatidylcholine synthase                                       | Metabolism: Lipid                   | 60.537  | 63.655  | 68.304  | 116.990 | 433.502  | 183.973   |
| AMK58_04825 | no KO assigned   (GenBank) hypothetical protein                                                                                  | Hypothetical                        | 30.707  | 26.209  | 61.313  | 241.516 | 648.415  | 131.795   |
| AMK58_04830 | no KO assigned   (GenBank) hypothetical protein                                                                                  | Hypothetical                        | 54.287  | 45.877  | 73.180  | 285.380 | 284.631  | 199.039   |
| AMK58_04835 | K20035 3-(methylthio)propanoyl-CoA dehydrogenase [EC:1.3.8.-]   (GenBank) acyl-CoA dehydrogenase                                 | Energy                              | 450.062 | 433.611 | 426.771 | 228.141 | 266.062  | 172.771   |
| AMK58_04840 | no KO assigned   (GenBank) hypothetical protein                                                                                  | Hypothetical                        | 58.660  | 77.102  | 64.364  | 191.103 | 75.563   | 204.849   |
| AMK58_04845 | no KO assigned   (GenBank) hypothetical protein                                                                                  | Hypothetical                        | 13.998  | 14.120  | 16.248  | 202.611 | 74.381   | 70.464    |
| AMK58_04850 | no KO assigned   (GenBank) hydroxycyclohexanone dehydrogenase                                                                    | Dehydrogenase                       | 90.556  | 78.214  | 79.759  | 163.415 | 114.629  | 177.296   |
| AMK58_04855 | K07566 L-threonylcarbamoyladenylyl synthase [EC:2.7.7.87]   (GenBank) translation factor Sua5                                    | Translation                         | 24.913  | 32.744  | 31.622  | 221.087 | 94.929   | 100.950   |
| AMK58_04860 | K03496 chromosome partitioning protein   (GenBank) cobyrinic acid a,c-diamide synthase                                           | Cell Cycle/Shape/Homeostasis        | 38.303  | 30.140  | 35.531  | 271.561 | 50.195   | 177.934   |
| AMK58_04865 | no KO assigned   (GenBank) hypothetical protein                                                                                  | Hypothetical                        | 56.283  | 53.743  | 58.484  | 82.396  | 87.859   | 187.792   |
| AMK58_04870 | K03564 peroxiredoxin O/BCP [EC:1.11.1.15]   (GenBank) alkyl hydroperoxide reductase                                              | Cell Cycle/Shape/Homeostasis        | 366.232 | 318.995 | 334.393 | 90.663  | 189.347  | 162.477   |
| AMK58_04875 | K00982 L-glutamine synthetase   (GenBank) glutamine synthetase   (GenBank) glutamine synthetase   (GenBank) glutamine synthetase | Metabolism                          | 65.472  | 63.276  | 69.155  | 237.905 | 103.671  | 163.234   |
| AMK58_04880 | no KO assigned   (GenBank) hypothetical protein                                                                                  | Hypothetical                        | 11.931  | 13.738  | 14.639  | 195.623 | 83.948   | 151.732   |
| AMK58_04885 | K01866 tyrosyl-tRNA synthetase [EC:6.1.1.11]   (GenBank) tyrosine-tRNA ligase                                                    | tRNA synthesis/modification         | 112.192 | 87.679  | 91.710  | 121.963 | 93.876   | 176.731   |
| AMK58_04890 | K09001 anhydro-N-acetylmuramic acid kinase [EC:2.7.1.170]   (GenBank) anhydro-N-acetylmuramic acid                               | Cell Wall                           | 37.524  | 51.475  | 52.386  | 194.988 | 74.928   | 91.140    |
| AMK58_04895 | K07018 uncharacterized protein   (GenBank) alpha/beta hydrolase                                                                  | Hydrolase                           | 261.324 | 226.935 | 277.466 | 171.726 | 570.237  | 218.274   |
| AMK58_04900 | K00640 serine O-acetyltransferase [EC:2.3.1.30]   (GenBank) serine acetyltransferase                                             | Metabolism                          | 329.592 | 428.032 | 388.489 | 134.736 | 1845.171 | 177.253   |
| AMK58_04905 | K13643 Rrf2 family transcriptional regulator, iron-sulfur cluster assembly transcription factor   (G                             | Transcription                       | 833.486 | 903.071 | 846.589 | 241.096 | 1471.103 | 182.467   |
| AMK58_04910 | K04487 cysteine desulfurase [EC:2.8.1.7]   (GenBank) cysteine desulfurase                                                        | Metabolism: Co-Factors and Vitamins | 94.858  | 108.536 | 113.154 | 205.027 | 290.772  | 85.337    |
| AMK58_04915 | K04082 molecular chaperone HscB   (GenBank) molecular chaperone DnaJ                                                             | Chaperone                           | 37.450  | 42.359  | 41.484  | 181.911 | 157.754  | 145.141   |
| AMK58_04920 | K04755 ferredoxin, 2Fe-2S   (GenBank) 2Fe-2S ferredoxin                                                                          | Ferredoxin                          | 194.087 | 155.631 | 240.354 | 252.125 | 272.599  | 187.116   |
| AMK58_04925 | K00566 tRNA-uridine 2-sulfuryltransferase [EC:2.8.1.13]   (GenBank) tRNA-specific 2-thiouridylylase                              | tRNA synthesis/modification         | 48.793  | 59.323  | 62.635  | 188.216 | 553.014  | 131.476   |
| AMK58_04930 | K14230 tRNA Met   (GenBank) tRNA-Met                                                                                             | tRNA synthesis/modification         | 137.218 | 163.961 | 138.143 | 188.136 | 248.597  | 13186.447 |
| AMK58_04935 | no KO assigned   (GenBank) hypothetical protein                                                                                  | Hypothetical                        | 41.016  | 45.428  | 54.223  | 151.706 | 76.183   | 178.167   |
| AMK58_04940 | no KO assigned   (GenBank) hypothetical protein                                                                                  | Hypothetical                        | 5.067   | 7.028   | 8.518   | 214.551 | 30.514   | 76.860    |
| AMK58_04945 | no KO assigned   (GenBank) hypothetical protein                                                                                  | Hypothetical                        | 0.758   | 2.469   | 2.881   | 148.071 | 18.115   | 57.220    |
| AMK58_04950 | no KO assigned   (GenBank) hypothetical protein                                                                                  | Hypothetical                        | 4.805   | 6.889   | 7.492   | 70.538  | 44.284   | 230.955   |
| AMK58_04955 | no KO assigned   (GenBank) hypothetical protein                                                                                  | Hypothetical                        | 7.800   | 10.131  | 13.866  | 173.543 | 47.652   | 151.265   |
| AMK58_04960 | K01607 4-carboxymuconolactone decarboxylase [EC:4.1.1.44]   (GenBank) 4-carboxymuconolactone decar                               | Metabolism                          | 11.653  | 20.376  | 17.565  | 404.703 | 43.767   | 94.349    |
| AMK58_04965 | no KO assigned   (GenBank) oxidoreductase                                                                                        | Oxidoreductase                      | 14.390  | 15.811  | 19.816  | 188.109 | 63.956   | 152.914   |
| AMK58_04970 | no KO assigned   (GenBank) LysR family transcriptional regulator                                                                 | Transcription                       | 14.855  | 16.493  | 21.749  | 198.638 | 33.395   | 182.606   |
| AMK58_04975 | no KO assigned   (GenBank) hypothetical protein                                                                                  | Hypothetical                        | 87.524  | 98.771  | 79.520  | 102.479 | 59.939   | 199.741   |
| AMK58_04980 | K20276 large repetitive protein   (GenBank) hypothetical protein                                                                 | Quorum Sensing                      | 10.904  | 10.290  | 11.231  | 133.191 | 37.228   | 146.671   |
| AMK58_04985 | no KO assigned   (GenBank) hypothetical protein                                                                                  | Hypothetical                        | 11.483  | 12.106  | 14.691  | 154.269 | 134.859  | 155.565   |
| AMK58_04990 | no KO assigned   (GenBank) hypothetical protein                                                                                  | Hypothetical                        | 104.868 | 136.697 | 129.320 | 110.678 | 592.952  | 314.119   |
| AMK58_04995 | K03413 two-component system, chemotaxis family, response regulator CheY   (GenBank) regulator                                    | Chemotaxis                          | 73.243  | 94.661  | 69.071  | 145.367 | 116.603  | 261.131   |
| AMK58_05000 | no KO assigned   (GenBank) hypothetical protein                                                                                  | Hypothetical                        | 34.305  | 38.177  | 42.210  | 171.196 | 88.461   | 256.973   |
| AMK58_05005 | K14236 tRNA Tyr   (GenBank) tRNA-Tyr                                                                                             | tRNA synthesis/modification         | 28.157  | 8.411   | 25.433  | 158.414 | 56.969   | 507.824   |
| AMK58_05010 | K15790 nitrogen fixation protein NifO   (GenBank) hydrogenase                                                                    | Nitrogen                            | 15.834  | 16.151  | 17.626  | 265.395 | 94.202   | 212.721   |
| AMK58_05015 | K09386 uncharacterized protein   (GenBank) carbon monoxide dehydrogenase                                                         | Dehydrogenase                       | 8.999   | 4.888   | 10.890  | 282.729 | 107.587  | 188.128   |
| AMK58_05020 | no KO assigned   (GenBank) hypothetical protein                                                                                  | Hypothetical                        | 36.611  | 32.723  | 39.195  | 172.998 | 57.678   | 179.097   |

|                             |                                                                                                      |                                       |          |          |          |         |          |          |
|-----------------------------|------------------------------------------------------------------------------------------------------|---------------------------------------|----------|----------|----------|---------|----------|----------|
| <a href="#">AMK58_05025</a> | no KO assigned   (GenBank) hypothetical protein                                                      | Hypothetical                          | 11.487   | 3.710    | 7.970    | 76.934  | 18.495   | 23.030   |
| <a href="#">AMK58_05030</a> | no KO assigned   (GenBank) murein transglycosylase                                                   | Cell Wall                             | 33.894   | 29.243   | 40.568   | 261.031 | 28.236   | 127.513  |
| <a href="#">AMK58_05035</a> | no KO assigned   (GenBank) hypothetical protein                                                      | Hypothetical                          | 7.244    | 4.122    | 13.447   | 302.192 | 876.657  | 270.919  |
| <a href="#">AMK58_05040</a> | no KO assigned   (GenBank) hypothetical protein                                                      | Hypothetical                          | 4.554    | 3.753    | 4.031    | 139.888 | 724.771  | 148.237  |
| <a href="#">AMK58_05045</a> | no KO assigned   (GenBank) hypothetical protein                                                      | Hypothetical                          | 21.910   | 26.398   | 28.628   | 189.400 | 128.515  | 98.880   |
| <a href="#">AMK58_05050</a> | no KO assigned   (GenBank) alcohol dehydrogenase                                                     | Dehydrogenase                         | 274.640  | 305.822  | 338.668  | 206.824 | 134.845  | 136.646  |
| <a href="#">AMK58_05055</a> | no KO assigned   (GenBank) hypothetical protein                                                      | Hypothetical                          | 118.868  | 133.745  | 132.057  | 112.770 | 91.083   | 74.554   |
| <a href="#">AMK58_05060</a> | no KO assigned   (GenBank) hypothetical protein                                                      | Hypothetical                          | 21.440   | 22.605   | 27.431   | 125.441 | 55.997   | 114.170  |
| <a href="#">AMK58_05065</a> | no KO assigned   (GenBank) glycosyltransferase                                                       | Glycosyltransferase                   | 7.869    | 7.388    | 18.492   | 267.147 | 122.825  | 212.030  |
| <a href="#">AMK58_05070</a> | no KO assigned   (GenBank) hypothetical protein                                                      | Hypothetical                          | 4.248    | 7.347    | 12.968   | 236.465 | 111.086  | 118.904  |
| <a href="#">AMK58_05075</a> | no KO assigned   (GenBank) hypothetical protein                                                      | Hypothetical                          | 17.949   | 26.647   | 26.892   | 223.971 | 87.183   | 151.307  |
| <a href="#">AMK58_05080</a> | no KO assigned   (GenBank) GNAT family acetyltransferase                                             | Acetyltransferase                     | 348.951  | 396.963  | 424.677  | 141.418 | 94.325   | 262.191  |
| <a href="#">AMK58_05085</a> | no KO assigned   (GenBank) hypothetical protein                                                      | Hypothetical                          | 1855.359 | 2123.183 | 2379.125 | 129.899 | 170.116  | 484.943  |
| <a href="#">AMK58_05090</a> | no KO assigned   (GenBank) hypothetical protein                                                      | Hypothetical                          | 8.546    | 14.183   | 14.898   | 299.567 | 85.392   | 292.341  |
| <a href="#">AMK58_05095</a> | K01679 fumarate hydratase, class II [EC:4.2.1.21]   (GenBank) fumarate hydratase                     | Metabolism: Carbon                    | 71.470   | 65.572   | 56.204   | 174.573 | 80.918   | 200.579  |
| <a href="#">AMK58_05100</a> | no KO assigned   (GenBank) arylsulfate sulfotransferase                                              | Transferase                           | 62.911   | 63.825   | 45.145   | 211.478 | 88.060   | 216.284  |
| <a href="#">AMK58_05105</a> | no KO assigned   (GenBank) hypothetical protein                                                      | Hypothetical                          | 34.254   | 29.380   | 34.826   | 145.150 | 51.845   | 236.332  |
| <a href="#">AMK58_05110</a> | no KO assigned   (GenBank) hypothetical protein                                                      | Hypothetical                          | 123.756  | 156.811  | 132.762  | 138.085 | 51.471   | 189.013  |
| <a href="#">AMK58_05115</a> | K01589 5-(carboxyamino)imidazole ribonucleotide synthase [EC:6.3.4.18]   (GenBank) phosphoribosylam  | Metabolism: Nucleotides               | 111.237  | 100.856  | 96.304   | 284.387 | 139.360  | 119.112  |
| <a href="#">AMK58_05120</a> | K01588 5-(carboxyamino)imidazole ribonucleotide mutase [EC:5.4.99.18]   (GenBank) purE; N5-carboxya  | Metabolism: Nucleotides               | 122.110  | 117.468  | 107.494  | 249.517 | 166.627  | 102.674  |
| <a href="#">AMK58_05125</a> | no KO assigned   (GenBank) hypothetical protein                                                      | Hypothetical                          | 146.976  | 140.353  | 174.683  | 95.214  | 165.885  | 311.674  |
| <a href="#">AMK58_05130</a> | K21071 ATP-dependent phosphofructokinase / diphosphate-dependent phosphofructokinase [EC:2.7.1.11]   | Metabolism: Carbohydrate              | 391.988  | 411.633  | 365.285  | 109.169 | 235.218  | 136.150  |
| <a href="#">AMK58_05135</a> | no KO assigned   (GenBank) hypothetical protein                                                      | Hypothetical                          | 159.861  | 151.873  | 193.111  | 234.151 | 164.372  | 88.698   |
| <a href="#">AMK58_05140</a> | no KO assigned   (GenBank) GCN5 family acetyltransferase                                             | Acetyltransferase                     | 71.451   | 71.351   | 72.243   | 195.009 | 139.565  | 106.923  |
| <a href="#">AMK58_05145</a> | no KO assigned   (GenBank) hypothetical protein                                                      | Hypothetical                          | 272.724  | 396.384  | 313.670  | 76.997  | 177.334  | 212.065  |
| <a href="#">AMK58_05150</a> | no KO assigned   (GenBank) hypothetical protein                                                      | Hypothetical                          | 15.297   | 17.543   | 23.699   | 167.400 | 59.949   | 88.524   |
| <a href="#">AMK58_05155</a> | K02390 flagellar hook protein FlgE   (GenBank) hypothetical protein                                  | Motility                              | 178.301  | 207.351  | 185.399  | 83.518  | 81.696   | 197.598  |
| <a href="#">AMK58_05160</a> | K01673 carbonic anhydrase [EC:4.2.1.1]   (GenBank) carbonic anhydrase                                | Nitrogen                              | 164.054  | 185.797  | 154.887  | 140.187 | 225.251  | 237.176  |
| <a href="#">AMK58_05165</a> | K03186 flavin prenyltransferase [EC:2.5.1.129]   (GenBank) 3-octaprenyl-4-hydroxybenzoate carboxy-ly | Biosynthesis: Terpenoid               | 88.054   | 85.244   | 101.940  | 204.234 | 258.210  | 209.797  |
| <a href="#">AMK58_05170</a> | K09987 uncharacterized protein   (GenBank) cytoplasmic protein                                       | No COG                                | 539.743  | 589.921  | 579.507  | 237.768 | 1652.497 | 300.657  |
| <a href="#">AMK58_05175</a> | no KO assigned   (GenBank) NAD(P)H-quinone oxidoreductase                                            | Energy                                | 152.545  | 150.699  | 162.172  | 173.288 | 206.165  | 179.208  |
| <a href="#">AMK58_05180</a> | no KO assigned   (GenBank) hypothetical protein                                                      | Hypothetical                          | 210.760  | 241.119  | 286.884  | 319.223 | 110.891  | 290.475  |
| <a href="#">AMK58_05185</a> | no KO assigned   (GenBank) hypothetical protein                                                      | Hypothetical                          | 1276.330 | 1523.352 | 1599.194 | 145.002 | 334.400  | 256.070  |
| <a href="#">AMK58_05190</a> | no KO assigned   (GenBank) hypothetical protein                                                      | Hypothetical                          | 276.202  | 275.026  | 266.812  | 91.230  | 119.790  | 339.148  |
| <a href="#">AMK58_05195</a> | no KO assigned   (GenBank) pseudogene                                                                | Pseudogene                            | 68.718   | 74.725   | 79.857   | 197.497 | 81.656   | 116.889  |
| <a href="#">AMK58_05200</a> | no KO assigned   (GenBank) hypothetical protein                                                      | Hypothetical                          | 448.625  | 518.835  | 469.726  | 166.047 | 510.755  | 190.123  |
| <a href="#">AMK58_05205</a> | no KO assigned   (GenBank) hypothetical protein                                                      | Hypothetical                          | 370.191  | 363.113  | 319.090  | 68.865  | 952.922  | 167.736  |
| <a href="#">AMK58_05210</a> | K00286 pyrroline-5-carboxylate reductase [EC:1.5.1.21]   (GenBank) pyrroline-5-carboxylate reductase | Metabolism: Amino Acid                | 145.787  | 145.021  | 200.485  | 195.877 | 411.731  | 147.795  |
| <a href="#">AMK58_05215</a> | no KO assigned   (GenBank) proyl-rRNA editing protein                                                | tRNA synthesis/modification           | 46.625   | 64.398   | 75.316   | 208.525 | 244.010  | 182.700  |
| <a href="#">AMK58_05220</a> | K00666 fatty-acyl-CoA synthase [EC:6.2.1.-1]   (GenBank) acyl-CoA synthetase                         | Biosynthesis: Lipid                   | 491.903  | 424.141  | 426.760  | 115.959 | 226.575  | 185.082  |
| <a href="#">AMK58_05225</a> | no KO assigned   (GenBank) hypothetical protein                                                      | Hypothetical                          | 87.344   | 95.147   | 88.032   | 207.105 | 65.045   | 164.185  |
| <a href="#">AMK58_05230</a> | no KO assigned   (GenBank) chemotaxis protein                                                        | Chemotaxis                            | 169.797  | 167.669  | 169.253  | 170.757 | 64.337   | 227.483  |
| <a href="#">AMK58_05235</a> | no KO assigned   (GenBank) ligase                                                                    | DNA Repair and Replication            | 31.542   | 39.211   | 37.535   | 271.491 | 57.146   | 140.428  |
| <a href="#">AMK58_05240</a> | no KO assigned   (GenBank) heptosyltransferase                                                       | Transferase                           | 13.068   | 22.198   | 15.227   | 207.838 | 57.894   | 128.071  |
| <a href="#">AMK58_05245</a> | K07027 glycosyltransferase 2 family protein   (GenBank) hypothetical protein                         | Glycosyltransferase                   | 26.654   | 27.041   | 41.840   | 154.439 | 56.246   | 71.815   |
| <a href="#">AMK58_05250</a> | K18979 epoxyqueuosine reductase [EC:1.17.99.6]   (GenBank) epoxyqueuosine reductase                  | tRNA synthesis/modification           | 28.070   | 24.920   | 31.513   | 259.437 | 121.394  | 151.993  |
| <a href="#">AMK58_05255</a> | K09457 7-cyano-7-deazaguanine reductase [EC:1.7.1.131]   (GenBank) 7-cyano-7-deazaguanine reductase  | Biosynthesis: Co-Factors and Vitamins | 124.720  | 104.225  | 148.541  | 83.360  | 196.969  | 186.875  |
| <a href="#">AMK58_05260</a> | K00773 queuine tRNA-ribosyltransferase [EC:2.4.2.29]   (GenBank) queuine tRNA-ribosyltransferase     | tRNA synthesis/modification           | 79.308   | 84.181   | 81.913   | 141.289 | 143.899  | 159.492  |
| <a href="#">AMK58_05265</a> | K07568 S-adenosylmethionine:tRNA ribosyltransferase-isomerase [EC:2.4.99.17]   (GenBank) S-adenosyl  | tRNA synthesis/modification           | 51.397   | 59.570   | 64.783   | 232.307 | 146.233  | 124.817  |
| <a href="#">AMK58_05270</a> | no KO assigned   (GenBank) ABC transporter ATP-binding protein                                       | Membrane Transport                    | 184.803  | 195.472  | 220.153  | 254.055 | 504.767  | 210.954  |
| <a href="#">AMK58_05275</a> | K03406 methyl-accepting chemotaxis protein   (GenBank) hypothetical protein                          | Chemotaxis                            | 14.963   | 20.201   | 18.879   | 114.195 | 38.087   | 241.883  |
| <a href="#">AMK58_05280</a> | no KO assigned   (GenBank) FAD-linked oxidase                                                        | Oxidoreductase                        | 2.549    | 3.046    | 5.332    | 199.403 | 51.954   | 131.809  |
| <a href="#">AMK58_05285</a> | no KO assigned   (GenBank) hypothetical protein                                                      | Hypothetical                          | 103.305  | 79.173   | 81.041   | 101.265 | 144.218  | 325.359  |
| <a href="#">AMK58_05290</a> | K08602 oligoendopeptidase F [EC:3.4.24.-]   (GenBank) oligoendopeptidase F                           | Peptidase                             | 167.534  | 179.037  | 165.539  | 168.742 | 251.991  | 243.127  |
| <a href="#">AMK58_05295</a> | no KO assigned   (GenBank) hypothetical protein                                                      | Hypothetical                          | 11.870   | 12.157   | 23.862   | 295.751 | 34.309   | 321.399  |
| <a href="#">AMK58_05300</a> | no KO assigned   (GenBank) hypothetical protein                                                      | Hypothetical                          | 17.518   | 25.834   | 34.051   | 229.763 | 30.035   | 181.050  |
| <a href="#">AMK58_05305</a> | K01908 propionyl-CoA synthetase [EC:6.2.1.17]   (GenBank) prpE; propionate--CoA ligase               | Metabolism: Carbohydrate              | 137.760  | 116.986  | 155.408  | 136.293 | 81.812   | 235.632  |
| <a href="#">AMK58_05310</a> | no KO assigned   (GenBank) hypothetical protein                                                      | Hypothetical                          | 8.561    | 14.613   | 16.279   | 331.471 | 21.078   | 203.749  |
| <a href="#">AMK58_05315</a> | K03088 RNA polymerase sigma-70 factor, ECF subfamily   (GenBank) RNA polymerase subunit sigma-2      | Transcription                         | 272.300  | 312.036  | 362.060  | 144.377 | 740.240  | 1182.794 |
| <a href="#">AMK58_05320</a> | no KO assigned   (GenBank) hypothetical protein                                                      | Hypothetical                          | 88.181   | 85.412   | 102.729  | 212.689 | 399.320  | 168.932  |
| <a href="#">AMK58_05325</a> | no KO assigned   (GenBank) hypothetical protein                                                      | Hypothetical                          | 52.228   | 65.462   | 58.688   | 132.342 | 176.121  | 217.089  |
| <a href="#">AMK58_05330</a> | no KO assigned   (GenBank) hypothetical protein                                                      | Hypothetical                          | 21.954   | 26.839   | 25.766   | 168.106 | 125.098  | 177.038  |
| <a href="#">AMK58_05335</a> | no KO assigned   (GenBank) hypothetical protein                                                      | Hypothetical                          | 114.283  | 114.707  | 130.145  | 117.922 | 356.015  | 227.325  |
| <a href="#">AMK58_05340</a> | K04090 indolepyruvate ferredoxin oxidoreductase [EC:1.2.7.8]   (GenBank) indolepyruvate ferredoxin o | Oxidoreductase                        | 1639.554 | 1692.371 | 1524.767 | 168.573 | 3598.119 | 245.718  |
| <a href="#">AMK58_05345</a> | no KO assigned   (GenBank) regulator                                                                 | Signal Transduction                   | 10.810   | 17.223   | 15.760   | 263.391 | 166.771  | 125.635  |
| <a href="#">AMK58_05350</a> | no KO assigned   (GenBank) inosine-5-monophosphate dehydrogenase                                     | Dehydrogenase                         | 220.312  | 307.178  | 273.342  | 227.727 | 711.537  | 201.727  |
| <a href="#">AMK58_05355</a> | no KO assigned   (GenBank) cation diffusion facilitator family transporter                           | Transport: Ion                        | 18.181   | 16.177   | 15.692   | 209.339 | 41.886   | 233.387  |

|                             |                                                                                                                                                             |                                       |          |          |          |          |           |          |
|-----------------------------|-------------------------------------------------------------------------------------------------------------------------------------------------------------|---------------------------------------|----------|----------|----------|----------|-----------|----------|
| <a href="#">AMK58_05360</a> | <a href="#">no KO assigned   (GenBank) hypothetical protein</a>                                                                                             | Hypothetical                          | 58,041   | 98,187   | 103,844  | 220,428  | 22,682    | 84,492   |
| <a href="#">AMK58_05365</a> | <a href="#">K13503 anthranilate synthase [EC:4.1.3.27]   (GenBank) anthranilate synthase</a>                                                                | Biosynthesis: Amino Acid              | 17,870   | 21,352   | 21,434   | 143,920  | 50,247    | 82,596   |
| <a href="#">AMK58_05370</a> | <a href="#">no KO assigned   (GenBank) hypothetical protein</a>                                                                                             | Hypothetical                          | 224,645  | 264,359  | 226,077  | 135,481  | 201,134   | 205,602  |
| <a href="#">AMK58_05375</a> | <a href="#">K00324 NAD(P) transhydrogenase subunit alpha [EC:1.6.1.2]   (GenBank) NAD(P) transhydrogenase subunit alpha</a>                                 | Energy                                | 525,180  | 412,275  | 477,475  | 80,253   | 85,440    | 89,389   |
| <a href="#">AMK58_05380</a> | <a href="#">K00324 NAD(P) transhydrogenase subunit alpha [EC:1.6.1.2]   (GenBank) NAD(P) transhydrogenase subunit alpha</a>                                 | Energy                                | 158,571  | 107,734  | 130,904  | 29,907   | 20,913    | 14,863   |
| <a href="#">AMK58_05385</a> | <a href="#">K00325 NAD(P) transhydrogenase subunit beta [EC:1.6.1.2]   (GenBank) NAD synthetase</a>                                                         | Energy                                | 404,537  | 308,528  | 375,312  | 47,784   | 97,168    | 52,795   |
| <a href="#">AMK58_05390</a> | <a href="#">no KO assigned   (GenBank) hypothetical protein</a>                                                                                             | Hypothetical                          | 99,634   | 113,024  | 93,934   | 87,288   | 49,617    | 196,862  |
| <a href="#">AMK58_05395</a> | <a href="#">K00606 3-methyl-2-oxobutanoate hydroxymethyltransferase [EC:2.1.2.11]   (GenBank) 3-methyl-2-oxobutanoate hydroxymethyltransferase</a>          | Biosynthesis: Co-Factors and Vitamins | 138,099  | 119,244  | 137,864  | 217,427  | 525,237   | 230,799  |
| <a href="#">AMK58_05400</a> | <a href="#">K02970 small subunit ribosomal protein S21   (GenBank) 30S ribosomal protein S21</a>                                                            | Ribosome                              | 1826,805 | 2740,950 | 1910,749 | 165,366  | 3697,866  | 457,334  |
| <a href="#">AMK58_05405</a> | <a href="#">K01462 peptide deformylase [EC:3.5.1.88]   (GenBank) peptide deformylase</a>                                                                    | Peptidase                             | 380,170  | 361,012  | 412,563  | 94,683   | 1768,961  | 217,510  |
| <a href="#">AMK58_05410</a> | <a href="#">K18587 ubiquinone biosynthesis protein COO9   (GenBank) ubiquinone biosynthesis protein</a>                                                     | Biosynthesis                          | 269,340  | 290,160  | 278,042  | 202,045  | 1264,629  | 227,869  |
| <a href="#">AMK58_05415</a> | <a href="#">K07343 DNA transformation protein and related proteins   (GenBank) transcriptional regulator</a>                                                | Transcription                         | 211,400  | 252,600  | 224,451  | 122,712  | 1610,076  | 240,281  |
| <a href="#">AMK58_05420</a> | <a href="#">K09985 uncharacterized protein   (GenBank) hypothetical protein</a>                                                                             | Hypothetical                          | 1971,789 | 1919,674 | 2034,822 | 75,746   | 8128,453  | 267,926  |
| <a href="#">AMK58_05425</a> | <a href="#">K03465 thymidylate synthase (FAD) [EC:2.1.1.148]   (GenBank) FAD-dependent thymidylate synthase</a>                                             | Metabolism: Co-Factors and Vitamins   | 3542,630 | 4689,100 | 3223,575 | 633,199  | 12364,045 | 6543,803 |
| <a href="#">AMK58_05430</a> | <a href="#">no KO assigned   (GenBank) hypothetical protein</a>                                                                                             | Hypothetical                          | 67,222   | 47,694   | 57,469   | 48,970   | 104,972   | 106,454  |
| <a href="#">AMK58_05435</a> | <a href="#">no KO assigned   (GenBank) hypothetical protein</a>                                                                                             | Hypothetical                          | 179,370  | 158,960  | 157,187  | 775,689  | 636,110   | 321,840  |
| <a href="#">AMK58_05440</a> | <a href="#">no KO assigned   (GenBank) hypothetical protein</a>                                                                                             | Hypothetical                          | 314,557  | 329,765  | 361,722  | 350,608  | 1010,025  | 216,284  |
| <a href="#">AMK58_05445</a> | <a href="#">K01989 putative ABC transport system substrate-binding protein   (GenBank) ABC transporter permease</a>                                         | Membrane Transport                    | 5,498    | 6,718    | 3,802    | 80,675   | 25,140    | 41,594   |
| <a href="#">AMK58_05450</a> | <a href="#">K05832 putative ABC transport system permease protein   (GenBank) ABC transporter permease</a>                                                  | Membrane Transport                    | 70,896   | 56,261   | 67,920   | 257,155  | 61,091    | 230,652  |
| <a href="#">AMK58_05455</a> | <a href="#">K05833 putative ABC transport system ATP-binding protein   (GenBank) ABC transporter ATP-binding protein</a>                                    | Membrane Transport                    | 50,372   | 32,633   | 52,655   | 238,401  | 59,861    | 192,040  |
| <a href="#">AMK58_05460</a> | <a href="#">K11747 glutathione-regulated potassium-efflux system protein KefB   (GenBank) potassium transporter</a>                                         | Transport: Ion                        | 9,839    | 11,196   | 8,400    | 40,434   | 20,011    | 48,532   |
| <a href="#">AMK58_05465</a> | <a href="#">K03593 ATP-binding protein involved in chromosome partitioning   (GenBank) hypothetical protein</a>                                             | Cell Cycle/Shape/Homeostasis          | 67,641   | 63,355   | 69,894   | 378,158  | 140,259   | 239,814  |
| <a href="#">AMK58_05470</a> | <a href="#">K04088 membrane protease subunit HIK [EC:3.4.-.-1]   (GenBank) hypothetical protein</a>                                                         | Hydrolase                             | 422,930  | 348,628  | 391,048  | 159,817  | 387,234   | 162,425  |
| <a href="#">AMK58_05475</a> | <a href="#">K04087 membrane protease subunit HIC [EC:3.4.-.-1]   (GenBank) hypothetical protein</a>                                                         | Hydrolase                             | 980,604  | 817,209  | 910,751  | 201,022  | 1742,940  | 186,524  |
| <a href="#">AMK58_05480</a> | <a href="#">K09937 uncharacterized protein   (GenBank) hypothetical protein</a>                                                                             | Hypothetical                          | 3951,266 | 3452,205 | 4069,972 | 1006,582 | 5471,811  | 1116,163 |
| <a href="#">AMK58_05485</a> | <a href="#">K04771 serine protease Do [EC:3.4.21.107]   (GenBank) serine protease</a>                                                                       | Defense                               | 13,136   | 11,820   | 14,522   | 40,387   | 34,513    | 30,819   |
| <a href="#">AMK58_05490</a> | <a href="#">K01079 phosphoserine phosphatase [EC:3.1.3.31]   (GenBank) phosphoserine phosphatase</a>                                                        | Metabolism                            | 1402,011 | 1253,978 | 1261,817 | 310,449  | 1647,987  | 342,692  |
| <a href="#">AMK58_05495</a> | <a href="#">no KO assigned   (GenBank) hypothetical protein</a>                                                                                             | Hypothetical                          | 63,632   | 57,691   | 68,506   | 289,878  | 74,865    | 255,764  |
| <a href="#">AMK58_05500</a> | <a href="#">K00791 tRNA dimethylallyltransferase [EC:2.5.1.75]   (GenBank) tRNA dimethylallyltransferase</a>                                                | tRNA synthesis/modification           | 1,463    | 5,099    | 4,289    | 123,640  | 14,802    | 119,958  |
| <a href="#">AMK58_05505</a> | <a href="#">no KO assigned   (GenBank) GntR family transcriptional regulator</a>                                                                            | Transcription                         | 17,696   | 16,075   | 16,628   | 146,660  | 15,703    | 122,057  |
| <a href="#">AMK58_05510</a> | <a href="#">K01652 acetolactate synthase I/II/III large subunit [EC:2.2.1.6]   (GenBank) acetolactate synthase</a>                                          | Metabolism                            | 196,712  | 177,968  | 140,309  | 81,920   | 36,569    | 139,510  |
| <a href="#">AMK58_05515</a> | <a href="#">K01653 acetolactate synthase I/II small subunit [EC:2.2.1.6]   (GenBank) acetolactate synthase small subunit</a>                                | Metabolism                            | 448,239  | 313,882  | 373,739  | 456,488  | 421,701   | 707,055  |
| <a href="#">AMK58_05520</a> | <a href="#">K00053 ketol-acid reductoisomerase [EC:1.1.1.86]   (GenBank) ketol-acid reductoisomerase</a>                                                    | Metabolism                            | 70,390   | 56,734   | 63,541   | 97,789   | 54,304    | 152,445  |
| <a href="#">AMK58_05525</a> | <a href="#">K02039 phosphate transport system protein   (GenBank) PhoU family transcriptional regulator</a>                                                 | Transport: ion                        | 504,221  | 317,045  | 354,011  | 200,144  | 116,596   | 304,004  |
| <a href="#">AMK58_05530</a> | <a href="#">no KO assigned   (GenBank) hypothetical protein</a>                                                                                             | Hypothetical                          | 78,933   | 83,925   | 103,035  | 215,352  | 105,265   | 271,473  |
| <a href="#">AMK58_05535</a> | <a href="#">K03569 rod shape-determining protein MreB and related proteins   (GenBank) rod shape-determining protein MreB</a>                               | Cell Cycle/Shape/Homeostasis          | 9,188    | 11,118   | 9,621    | 71,979   | 29,938    | 117,015  |
| <a href="#">AMK58_05540</a> | <a href="#">K03570 rod shape-determining protein MreC   (GenBank) rod shape-determining protein MreC</a>                                                    | Cell Cycle/Shape/Homeostasis          | 378,950  | 424,867  | 405,033  | 229,670  | 181,301   | 205,312  |
| <a href="#">AMK58_05545</a> | <a href="#">K03571 rod shape-determining protein MreD   (GenBank) rod shape-determining protein MreD</a>                                                    | Cell Cycle/Shape/Homeostasis          | 263,391  | 272,140  | 282,973  | 407,204  | 132,114   | 291,070  |
| <a href="#">AMK58_05550</a> | <a href="#">K05515 penicillin-binding protein 2   (GenBank) penicillin-binding protein 2</a>                                                                | Cell Wall                             | 9,671    | 12,326   | 12,015   | 23,749   | 30,291    | 40,592   |
| <a href="#">AMK58_05555</a> | <a href="#">K03406 methyl-accepting chemotaxis protein   (GenBank) hypothetical protein</a>                                                                 | Chemotaxis                            | 21,890   | 25,986   | 28,542   | 134,773  | 80,550    | 192,736  |
| <a href="#">AMK58_05560</a> | <a href="#">no KO assigned   (GenBank) alkaline phosphatase</a>                                                                                             | Phosphatase                           | 205,184  | 153,633  | 168,094  | 349,011  | 286,438   | 468,453  |
| <a href="#">AMK58_05565</a> | <a href="#">no KO assigned   (GenBank) lysine transporter LysE</a>                                                                                          | Transport: Amino Acid                 | 36,395   | 57,050   | 42,656   | 90,988   | 113,411   | 217,857  |
| <a href="#">AMK58_05570</a> | <a href="#">K07335 basic membrane protein A and related proteins   (GenBank) hypothetical protein</a>                                                       | Membrane                              | 20,728   | 24,039   | 23,650   | 90,811   | 74,008    | 154,215  |
| <a href="#">AMK58_05575</a> | <a href="#">K02056 simple sugar transport system ATP-binding protein [EC:3.6.3.17]   (GenBank) heme ABC transporter ATP-binding protein</a>                 | Transport: Sugar                      | 97,349   | 95,129   | 86,114   | 100,627  | 69,907    | 150,351  |
| <a href="#">AMK58_05580</a> | <a href="#">K02057 simple sugar transport system permease protein   (GenBank) sugar ABC transporter permease</a>                                            | Transport: Sugar                      | 21,378   | 29,283   | 26,474   | 341,834  | 70,684    | 133,350  |
| <a href="#">AMK58_05585</a> | <a href="#">K02057 simple sugar transport system permease protein   (GenBank) sugar ABC transporter permease</a>                                            | Transport: Sugar                      | 49,423   | 40,805   | 43,804   | 214,252  | 85,425    | 168,692  |
| <a href="#">AMK58_05590</a> | <a href="#">K01489 cvtidine deaminase [EC:3.5.4.5]   (GenBank) cvtidine deaminase</a>                                                                       | Metabolism: Nucleotides               | 77,568   | 63,272   | 100,967  | 419,843  | 221,996   | 346,895  |
| <a href="#">AMK58_05595</a> | <a href="#">K03815 xanthosine phosphorylase [EC:2.4.2.-1]   (GenBank) purine nucleoside phosphorylase</a>                                                   | Metabolism: Nucleotides               | 7,549    | 5,204    | 8,834    | 118,820  | 18,766    | 44,019   |
| <a href="#">AMK58_05600</a> | <a href="#">K01619 deoxyribose-phosphate aldolase [EC:4.1.2.4]   (GenBank) 2-deoxyribose-5-phosphate aldolase</a>                                           | Metabolism: Carbohydrate              | 19,704   | 31,662   | 32,688   | 231,356  | 68,428    | 101,937  |
| <a href="#">AMK58_05605</a> | <a href="#">K00758 thymidine phosphorylase [EC:2.4.2.4]   (GenBank) thymidine phosphorylase</a>                                                             | Metabolism: Nucleotides               | 19,767   | 21,323   | 24,712   | 111,924  | 50,302    | 98,607   |
| <a href="#">AMK58_05610</a> | <a href="#">no KO assigned   (GenBank) pseudogene</a>                                                                                                       | Pseudogene                            | 14,532   | 14,395   | 18,614   | 154,621  | 42,825    | 78,198   |
| <a href="#">AMK58_05615</a> | <a href="#">no KO assigned   (GenBank) S-adenosylmethionine uptake transporter</a>                                                                          | Membrane Transport                    | 9,988    | 9,677    | 14,502   | 321,840  | 53,709    | 145,187  |
| <a href="#">AMK58_05620</a> | <a href="#">no KO assigned   (GenBank) hypothetical protein</a>                                                                                             | Hypothetical                          | 367,388  | 434,396  | 442,507  | 635,443  | 420,161   | 239,984  |
| <a href="#">AMK58_05625</a> | <a href="#">K01999 branched-chain amino acid transport system substrate-binding protein   (GenBank) ABC transporter permease</a>                            | Transport: Amino Acid                 | 2,201    | 3,131    | 3,588    | 38,054   | 17,792    | 28,092   |
| <a href="#">AMK58_05630</a> | <a href="#">K01997 branched-chain amino acid transport system permease protein   (GenBank) ABC transporter permease</a>                                     | Transport: Amino Acid                 | 158,560  | 162,653  | 131,249  | 243,554  | 180,227   | 154,640  |
| <a href="#">AMK58_05635</a> | <a href="#">K01995 branched-chain amino acid transport system ATP-binding protein K01998 branched-chain amino acid transport system ATP-binding protein</a> | Transport: Amino Acid                 | 23,213   | 24,028   | 20,864   | 108,975  | 34,816    | 62,219   |
| <a href="#">AMK58_05640</a> | <a href="#">K01996 branched-chain amino acid transport system ATP-binding protein   (GenBank) ABC transporter ATP-binding protein</a>                       | Transport: Amino Acid                 | 97,817   | 97,060   | 104,388  | 374,081  | 120,715   | 325,392  |
| <a href="#">AMK58_05645</a> | <a href="#">no KO assigned   (GenBank) hypothetical protein</a>                                                                                             | Hypothetical                          | 15,437   | 21,098   | 18,131   | 138,534  | 29,600    | 30,968   |
| <a href="#">AMK58_05650</a> | <a href="#">K03281 chloride channel protein, CIC family   (GenBank) chloride channel protein</a>                                                            | Transport: Ion                        | 57,251   | 60,869   | 59,934   | 118,514  | 54,304    | 138,966  |
| <a href="#">AMK58_05655</a> | <a href="#">no KO assigned   (GenBank) polyphosphate kinase</a>                                                                                             | Signal Transduction                   | 78,203   | 94,504   | 134,938  | 448,932  | 623,800   | 340,373  |
| <a href="#">AMK58_05660</a> | <a href="#">no KO assigned   (GenBank) polyphosphate kinase</a>                                                                                             | Signal Transduction                   | 370,536  | 387,013  | 355,784  | 123,794  | 243,916   | 197,150  |
| <a href="#">AMK58_05665</a> | <a href="#">K16147 starch synthase (maltoyl-transferring) [EC:2.4.99.16]   (GenBank) alpha-amylase</a>                                                      | Metabolism: Carbohydrate              | 6,424    | 6,168    | 6,168    | 52,141   | 24,092    | 64,211   |
| <a href="#">AMK58_05670</a> | <a href="#">no KO assigned   (GenBank) hypothetical protein</a>                                                                                             | Hypothetical                          | 151,242  | 211,892  | 205,431  | 1350,457 | 3121,437  | 2611,309 |
| <a href="#">AMK58_05675</a> | <a href="#">no KO assigned   (GenBank) diguanylate phosphodiesterase</a>                                                                                    | cyclic nucleotide                     | 21,493   | 24,943   | 30,875   | 51,369   | 65,005    | 54,486   |
| <a href="#">AMK58_05680</a> | <a href="#">K03520 carbon-monoxide dehydrogenase large subunit [EC:1.2.7.4]   (GenBank) carbon monoxide dehydrogenase large subunit</a>                     | Dehydrogenase                         | 135,276  | 152,532  | 141,975  | 58,398   | 76,585    | 56,643   |
| <a href="#">AMK58_05685</a> | <a href="#">no KO assigned   (GenBank) hypothetical protein</a>                                                                                             | Hypothetical                          | 176,418  | 183,128  | 211,780  | 626,389  | 340,137   | 502,924  |
| <a href="#">AMK58_05690</a> | <a href="#">no KO assigned   (GenBank) nuclease</a>                                                                                                         | DNA Repair and Replication            | 121,376  | 165,544  | 144,615  | 453,878  | 313,150   | 382,052  |

|                             |                                                                                                                      |                                       |          |          |          |         |          |          |
|-----------------------------|----------------------------------------------------------------------------------------------------------------------|---------------------------------------|----------|----------|----------|---------|----------|----------|
| <a href="#">AMK58_05695</a> | <a href="#">no KO assigned   (GenBank) regulator</a>                                                                 | Signal Transduction                   | 144.824  | 229.990  | 196.293  | 108.956 | 114.981  | 127.815  |
| <a href="#">AMK58_05700</a> | <a href="#">no KO assigned   (GenBank) transglycosylase</a>                                                          | Transglycosylase                      | 648.079  | 765.411  | 840.190  | 814.701 | 7045.197 | 777.185  |
| <a href="#">AMK58_05705</a> | <a href="#">K01783 ribulose-phosphate 3-epimerase [EC:5.1.3.1]   (GenBank) ribulose phosphate epimerase</a>          | Metabolism                            | 50.494   | 27.525   | 98.999   | 103.434 | 384.458  | 152.085  |
| <a href="#">AMK58_05710</a> | <a href="#">K02019 molybdate transport system regulatory protein I (GenBank) LysR family transcriptional regulat</a> | Transcription                         | 271.265  | 225.618  | 218.452  | 238.645 | 222.934  | 400.963  |
| <a href="#">AMK58_05715</a> | <a href="#">no KO assigned   (GenBank) Zn-dependent oxidoreductase</a>                                               | Oxidoreductase                        | 9.194    | 15.694   | 10.218   | 137.074 | 38.922   | 90.126   |
| <a href="#">AMK58_05720</a> | <a href="#">no KO assigned   (GenBank) HxIR family transcriptional regulator</a>                                     | Transcription                         | 74.379   | 73.730   | 95.140   | 647.403 | 200.953  | 491.141  |
| <a href="#">AMK58_05725</a> | <a href="#">K07234 uncharacterized protein involved in response to NO   (GenBank) hypothetical protein</a>           | Nitrogen                              | 27.374   | 29.736   | 35.184   | 73.049  | 20.432   | 76.552   |
| <a href="#">AMK58_05730</a> | <a href="#">K00020 3-hydroxyisobutyrate dehydrogenase [EC:1.1.1.31]   (GenBank) hypothetical protein</a>             | Metabolism: Amino Acid                | 29.466   | 38.379   | 37.178   | 171.165 | 42.696   | 73.940   |
| <a href="#">AMK58_05735</a> | <a href="#">no KO assigned   (GenBank) sugar dehydrogenase</a>                                                       | Metabolism: Carbohydrate              | 43.241   | 49.755   | 62.432   | 246.926 | 82.628   | 74.401   |
| <a href="#">AMK58_05740</a> | <a href="#">K01754 threonine dehydratase [EC:4.3.1.19]   (GenBank) pyridoxal-5'-phosphate-dependent protein</a>      | Metabolism: Amino Acid                | 36.335   | 35.694   | 42.083   | 137.360 | 55.095   | 106.277  |
| <a href="#">AMK58_05745</a> | <a href="#">no KO assigned   (GenBank) hypothetical protein</a>                                                      | Hypothetical                          | 71.075   | 61.720   | 89.450   | 162.186 | 76.020   | 82.254   |
| <a href="#">AMK58_05750</a> | <a href="#">no KO assigned   (GenBank) HAD family hydrolase</a>                                                      | Hydrolase                             | 35.254   | 40.028   | 42.620   | 264.968 | 101.487  | 126.322  |
| <a href="#">AMK58_05755</a> | <a href="#">K07234 uncharacterized protein involved in response to NO   (GenBank) short-chain dehydrogenase</a>      | Nitrogen                              | 5.408    | 5.385    | 6.570    | 92.831  | 220.518  | 126.942  |
| <a href="#">AMK58_05760</a> | <a href="#">no KO assigned   (GenBank) hypothetical protein</a>                                                      | Hypothetical                          | 26.051   | 22.964   | 35.531   | 449.086 | 522.291  | 218.797  |
| <a href="#">AMK58_05765</a> | <a href="#">K03831 molybdopterin adenylyltransferase [EC:2.7.7.75]   (GenBank) molybdopterin adenylyltransferase</a> | Biosynthesis: Co-Factors and Vitamins | 29.148   | 42.866   | 44.768   | 156.479 | 521.691  | 209.154  |
| <a href="#">AMK58_05770</a> | <a href="#">no KO assigned   (GenBank) cytochrome c oxidase accessory protein CcoG</a>                               | Energy                                | 11.578   | 5.929    | 11.874   | 51.514  | 27.609   | 75.997   |
| <a href="#">AMK58_05775</a> | <a href="#">K09790 uncharacterized protein I (GenBank) hypothetical protein</a>                                      | Hypothetical                          | 189.241  | 151.434  | 183.910  | 416.343 | 217.970  | 690.048  |
| <a href="#">AMK58_05780</a> | <a href="#">no KO assigned   (GenBank) hypothetical protein</a>                                                      | Hypothetical                          | 36.663   | 28.866   | 36.481   | 269.548 | 79.547   | 197.131  |
| <a href="#">AMK58_05785</a> | <a href="#">no KO assigned   (GenBank) hypothetical protein</a>                                                      | Hypothetical                          | 5.435    | 12.990   | 7.752    | 48.783  | 20.009   | 82.281   |
| <a href="#">AMK58_05790</a> | <a href="#">K00873 pyruvate kinase [EC:2.7.1.40]   (GenBank) pyruvate kinase</a>                                     | Metabolism: Carbohydrate              | 45.812   | 53.136   | 54.169   | 93.288  | 54.607   | 114.526  |
| <a href="#">AMK58_05795</a> | <a href="#">K02952 small subunit ribosomal protein S13   (GenBank) 30S ribosomal protein S13</a>                     | Ribosome                              | 282.180  | 268.563  | 345.981  | 817.522 | 335.623  | 730.818  |
| <a href="#">AMK58_05800</a> | <a href="#">K02948 small subunit ribosomal protein S11   (GenBank) 30S ribosomal protein S11</a>                     | Ribosome                              | 2227.897 | 1945.264 | 1889.509 | 117.879 | 2380.096 | 274.343  |
| <a href="#">AMK58_05805</a> | <a href="#">K03040 DNA-directed RNA polymerase subunit alpha [EC:2.7.7.6]   (GenBank) DNA-directed RNA poly</a>      | Transcription                         | 754.106  | 621.235  | 645.230  | 85.863  | 705.283  | 102.694  |
| <a href="#">AMK58_05810</a> | <a href="#">K02879 large subunit ribosomal protein L17   (GenBank) 50S ribosomal protein L17</a>                     | Ribosome                              | 2564.038 | 2115.345 | 2180.184 | 422.910 | 2484.103 | 608.857  |
| <a href="#">AMK58_05815</a> | <a href="#">no KO assigned   (GenBank) cytochrome B</a>                                                              | Energy                                | 859.861  | 991.959  | 724.116  | 82.634  | 1088.040 | 423.096  |
| <a href="#">AMK58_05820</a> | <a href="#">no KO assigned   (GenBank) hypothetical protein</a>                                                      | Hypothetical                          | 266.456  | 221.939  | 254.221  | 209.490 | 779.443  | 537.959  |
| <a href="#">AMK58_05825</a> | <a href="#">no KO assigned   (GenBank) hypothetical protein</a>                                                      | Hypothetical                          | 43.069   | 55.781   | 64.432   | 137.979 | 133.385  | 95.513   |
| <a href="#">AMK58_05830</a> | <a href="#">K07478 putative ATPase I (GenBank) AAA family ATPase</a>                                                 | DNA Repair and Replication            | 47.507   | 33.519   | 44.912   | 30.546  | 12.613   | 23.075   |
| <a href="#">AMK58_05835</a> | <a href="#">no KO assigned   (GenBank) hypothetical protein</a>                                                      | Hypothetical                          | 73.946   | 66.625   | 67.910   | 284.181 | 53.572   | 180.961  |
| <a href="#">AMK58_05840</a> | <a href="#">K06199 CrcB protein I (GenBank) protein CrcB</a>                                                         | Transport: ion                        | 26.805   | 34.188   | 32.932   | 611.626 | 58.229   | 188.792  |
| <a href="#">AMK58_05845</a> | <a href="#">K06179 23S rRNA pseudouridine955/2504/2580 synthase [EC:5.4.99.24]   (GenBank) RNA pseudouridri</a>      | Ribosome                              | 88.669   | 112.758  | 113.200  | 54.539  | 36.825   | 82.771   |
| <a href="#">AMK58_05850</a> | <a href="#">no KO assigned   (GenBank) GntR family transcriptional regulator</a>                                     | Transcription                         | 143.711  | 143.623  | 152.825  | 231.996 | 74.555   | 229.746  |
| <a href="#">AMK58_05855</a> | <a href="#">K05782 benzoate membrane transport protein I (GenBank) benzoate transporter</a>                          | Membrane Transport                    | 14.585   | 14.324   | 14.627   | 155.763 | 20.436   | 47.891   |
| <a href="#">AMK58_05860</a> | <a href="#">K01091 phosphoglycolate phosphatase [EC:3.1.3.18]   (GenBank) haloacid dehalogenase</a>                  | Metabolism: Carbohydrate              | 16.004   | 12.472   | 23.487   | 434.593 | 68.047   | 174.373  |
| <a href="#">AMK58_05865</a> | <a href="#">no KO assigned   (GenBank) ATPase</a>                                                                    | Energy                                | 27.194   | 27.941   | 27.339   | 215.552 | 50.232   | 96.048   |
| <a href="#">AMK58_05870</a> | <a href="#">no KO assigned   (GenBank) hypothetical protein</a>                                                      | Hypothetical                          | 82.764   | 101.340  | 78.136   | 334.557 | 275.474  | 199.319  |
| <a href="#">AMK58_05875</a> | <a href="#">no KO assigned   (GenBank) hypothetical protein</a>                                                      | Hypothetical                          | 117.955  | 217.822  | 155.160  | 129.279 | 256.407  | 67.976   |
| <a href="#">AMK58_05880</a> | <a href="#">K06980 rRNA-modifying protein YgtZ   (GenBank) glycine cleavage system protein T</a>                     | rRNA synthesis/modification           | 49.446   | 36.727   | 86.403   | 230.390 | 3896.081 | 155.145  |
| <a href="#">AMK58_05885</a> | <a href="#">K06140 regulator of nucleoside diphosphate kinase I (GenBank) hypothetical protein</a>                   | transcription                         | 351.058  | 425.503  | 385.705  | 304.099 | 615.088  | 421.837  |
| <a href="#">AMK58_05890</a> | <a href="#">K02056 simple sugar transport system ATP-binding protein [EC:3.6.3.17]   (GenBank) ABC transporter</a>   | Transport: Sugar                      | 343.316  | 403.561  | 375.996  | 55.930  | 52.330   | 90.577   |
| <a href="#">AMK58_05895</a> | <a href="#">K02057 simple sugar transport system permease protein I (GenBank) sugar ABC transporter permease</a>     | Transport: Sugar                      | 81.825   | 68.891   | 76.641   | 273.577 | 72.907   | 224.025  |
| <a href="#">AMK58_05900</a> | <a href="#">K02057 simple sugar transport system permease protein I (GenBank) ABC transporter permease</a>           | Transport: Sugar                      | 72.282   | 62.799   | 68.973   | 230.676 | 39.967   | 230.917  |
| <a href="#">AMK58_05905</a> | <a href="#">K02058 simple sugar transport system substrate-binding protein I (GenBank) ABC transporter substrate</a> | Transport: Sugar                      | 78.243   | 69.179   | 71.188   | 190.949 | 48.144   | 151.986  |
| <a href="#">AMK58_05910</a> | <a href="#">no KO assigned   (GenBank) hypothetical protein</a>                                                      | Hypothetical                          | 4767.283 | 4486.212 | 4395.807 | 312.139 | 782.784  | 576.372  |
| <a href="#">AMK58_05915</a> | <a href="#">no KO assigned   (GenBank) hypothetical protein</a>                                                      | Hypothetical                          | 26.469   | 21.920   | 29.901   | 419.858 | 100.155  | 189.789  |
| <a href="#">AMK58_05920</a> | <a href="#">no KO assigned   (GenBank) hypothetical protein</a>                                                      | Hypothetical                          | 6.490    | 6.058    | 8.677    | 107.852 | 48.328   | 236.763  |
| <a href="#">AMK58_05925</a> | <a href="#">no KO assigned   (GenBank) hypothetical protein</a>                                                      | Hypothetical                          | 9.212    | 11.794   | 15.850   | 238.578 | 108.234  | 180.404  |
| <a href="#">AMK58_05930</a> | <a href="#">no KO assigned   (GenBank) hypothetical protein</a>                                                      | Hypothetical                          | 3.283    | 4.904    | 6.114    | 106.658 | 71.660   | 130.537  |
| <a href="#">AMK58_05935</a> | <a href="#">K00948 ribose-phosphate pyrophosphokinase [EC:2.7.6.11]   (GenBank) ribose-phosphate pyrophosphokin</a>  | Metabolism: Carbohydrate              | 43.473   | 48.547   | 37.987   | 185.044 | 111.280  | 201.432  |
| <a href="#">AMK58_05940</a> | <a href="#">K07576 metallo-beta-lactamase family protein I (GenBank) MBL fold metallo-hydrolase</a>                  | Hydrolase                             | 110.308  | 128.207  | 162.441  | 92.087  | 33.600   | 101.099  |
| <a href="#">AMK58_05945</a> | <a href="#">no KO assigned   (GenBank) hypothetical protein</a>                                                      | Hypothetical                          | 309.015  | 312.455  | 325.149  | 529.743 | 173.136  | 402.355  |
| <a href="#">AMK58_05950</a> | <a href="#">no KO assigned   (GenBank) diguanylate cyclase</a>                                                       | cyclic nucleotide                     | 48.091   | 46.978   | 43.454   | 19.262  | 21.291   | 39.236   |
| <a href="#">AMK58_05955</a> | <a href="#">no KO assigned   (GenBank) short-chain dehydrogenase</a>                                                 | Dehydrogenase                         | 223.937  | 256.575  | 247.555  | 335.877 | 281.608  | 403.499  |
| <a href="#">AMK58_05960</a> | <a href="#">no KO assigned   (GenBank) hypothetical protein</a>                                                      | Hypothetical                          | 4.399    | 5.142    | 6.456    | 196.391 | 178.448  | 90.277   |
| <a href="#">AMK58_05965</a> | <a href="#">no KO assigned   (GenBank) dimethylhistidine N-methyltransferase</a>                                     | Methyltransferase                     | 10.307   | 8.161    | 14.641   | 302.248 | 236.174  | 215.212  |
| <a href="#">AMK58_05970</a> | <a href="#">no KO assigned   (GenBank) hemerythrin</a>                                                               | No COG                                | 15.035   | 12.608   | 20.315   | 367.127 | 252.914  | 296.695  |
| <a href="#">AMK58_05975</a> | <a href="#">K00796 dihydropterolate synthase [EC:2.5.1.15]   (GenBank) dihydropterolate synthase</a>                 | Biosynthesis: Co-Factors and Vitamins | 24.507   | 23.053   | 26.474   | 30.314  | 296.803  | 119.716  |
| <a href="#">AMK58_05980</a> | <a href="#">K03431 phosphoglucoamine mutase [EC:5.4.2.10]   (GenBank) phosphoglucoamine mutase</a>                   | Metabolism: Carbohydrate              | 31.685   | 30.669   | 33.071   | 138.474 | 126.742  | 122.610  |
| <a href="#">AMK58_05985</a> | <a href="#">K00941 hydroxymethylpyrimidine/phosphomethylpyrimidine kinase [EC:2.7.1.49 2.7.4.71]   (GenBank) ph</a>  | Metabolism: Co-Factors and Vitamins   | 252.428  | 331.425  | 301.091  | 295.822 | 464.688  | 345.079  |
| <a href="#">AMK58_05990</a> | <a href="#">no KO assigned   (GenBank) transcriptional regulator</a>                                                 | Transcription                         | 147.633  | 172.672  | 175.773  | 92.545  | 206.920  | 89.816   |
| <a href="#">AMK58_05995</a> | <a href="#">no KO assigned   (GenBank) hypothetical protein</a>                                                      | Hypothetical                          | 878.996  | 1156.926 | 1069.163 | 810.433 | 1180.723 | 586.755  |
| <a href="#">AMK58_06000</a> | <a href="#">no KO assigned   (GenBank) hypothetical protein</a>                                                      | Hypothetical                          | 21.072   | 40.542   | 36.335   | 90.422  | 532.731  | 110.283  |
| <a href="#">AMK58_06005</a> | <a href="#">K06890 uncharacterized protein I (GenBank) hypothetical protein</a>                                      | Hypothetical                          | 58.036   | 66.756   | 67.073   | 44.009  | 566.118  | 104.383  |
| <a href="#">AMK58_06010</a> | <a href="#">no KO assigned   (GenBank) hypothetical protein</a>                                                      | Hypothetical                          | 733.284  | 713.845  | 705.048  | 44.529  | 4645.799 | 190.850  |
| <a href="#">AMK58_06015</a> | <a href="#">no KO assigned   (GenBank) hypothetical protein</a>                                                      | Hypothetical                          | 35.010   | 31.955   | 37.448   | 644.184 | 271.093  | 1296.737 |
| <a href="#">AMK58_06020</a> | <a href="#">no KO assigned   (GenBank) GCN5 family acetyltransferase</a>                                             | Acetyltransferase                     | 1348.953 | 1283.653 | 1259.959 | 49.006  | 158.612  | 116.308  |
| <a href="#">AMK58_06025</a> | <a href="#">no KO assigned   (GenBank) isomerase</a>                                                                 | Isomerase                             | 1157.901 | 1330.246 | 1379.690 | 101.800 | 122.227  | 105.350  |

|             |                                                                                                                                                               |                                     |          |          |          |          |           |          |
|-------------|---------------------------------------------------------------------------------------------------------------------------------------------------------------|-------------------------------------|----------|----------|----------|----------|-----------|----------|
| AMK58_06030 | no KO assigned   (GenBank) acyl dehydratase                                                                                                                   | dehydratase                         | 3582.592 | 3591.397 | 3459.375 | 159.696  | 297.256   | 204.104  |
| AMK58_06035 | K04046 hypothetical chaperone protein   (GenBank) heat-shock protein                                                                                          | Hypothetical                        | 481.653  | 468.685  | 460.566  | 57.227   | 74.474    | 41.718   |
| AMK58_06040 | K01915 glutamine synthetase [EC:6.3.1.2]   (GenBank) glnA; glutamine synthetase                                                                               | Metabolism                          | 83.550   | 89.778   | 101.403  | 208.771  | 77.699    | 149.693  |
| AMK58_06045 | K04751 nitrogen regulatory protein P-II   (GenBank) transcriptional regulator                                                                                 | Nitrogen                            | 6577.325 | 5251.263 | 5242.157 | 478.903  | 1251.335  | 1019.700 |
| AMK58_06050 | K14226 tRNA His   (GenBank) tRNA-His                                                                                                                          | tRNA synthesis/modification         | 3957.234 | 3445.457 | 2988.548 | 358.516  | 2052.142  | 1472.801 |
| AMK58_06055 | K14226 tRNA His   (GenBank) tRNA-His                                                                                                                          | tRNA synthesis/modification         | 138.599  | 228.428  | 245.385  | 168.588  | 207.721   | 781.456  |
| AMK58_06060 | no KO assigned   (GenBank) hypothetical protein                                                                                                               | Hypothetical                        | 23.687   | 36.981   | 28.093   | 27.528   | 27.738    | 60.459   |
| AMK58_06065 | K01578 malonyl-CoA decarboxylase [EC:4.1.1.9]   (GenBank) malonyl-CoA decarboxylase                                                                           | Metabolism: Carbohydrate            | 16.237   | 15.391   | 18.704   | 139.913  | 85.727    | 89.685   |
| AMK58_06070 | K14228 tRNA Leu   (GenBank) tRNA-Leu                                                                                                                          | tRNA synthesis/modification         | 1888.767 | 2425.369 | 1901.494 | 3209.372 | 3291.854  | 2892.595 |
| AMK58_06075 | K03545 trigger factor   (GenBank) trigger factor                                                                                                              | Chaperone                           | 81.714   | 74.774   | 60.966   | 20.167   | 45.568    | 21.192   |
| AMK58_06080 | K01358 ATP-dependent Clp protease, protease subunit [EC:3.4.21.92]   (GenBank) clpP; ATP-dependent                                                            | Peptidase                           | 2535.111 | 1837.529 | 2068.140 | 276.459  | 1260.313  | 503.529  |
| AMK58_06085 | K03544 ATP-dependent Clp protease ATP-binding subunit ClpX   (GenBank) ATP-dependent Clp protease                                                             | Peptidase                           | 610.431  | 533.539  | 558.268  | 49.078   | 2225.858  | 163.760  |
| AMK58_06090 | K01338 ATP-dependent Lon protease [EC:3.4.21.53]   (GenBank) DNA-binding protein                                                                              | Peptidase                           | 1431.440 | 1648.891 | 1496.546 | 40.093   | 2854.858  | 144.393  |
| AMK58_06095 | K03530 DNA-binding protein HU-beta   (GenBank) DNA-binding protein HU                                                                                         | No COG                              | 9424.763 | 9877.910 | 9281.623 | 667.754  | 21605.418 | 2144.227 |
| AMK58_06100 | K14237 tRNA Val   (GenBank) tRNA-Val                                                                                                                          | tRNA synthesis/modification         | 1754.777 | 2719.817 | 1708.365 | 1029.340 | 553.446   | 1937.026 |
| AMK58_06105 | K14221 tRNA Asp   (GenBank) tRNA-Asp                                                                                                                          | tRNA synthesis/modification         | 273.598  | 347.586  | 321.436  | 149.548  | 346.419   | 686.740  |
| AMK58_06110 | K00330 NADH-quinone oxidoreductase subunit A [EC:1.6.5.3]   (GenBank) NADH:ubiquinone oxidoreductase                                                          | Energy                              | 18.703   | 15.683   | 30.886   | 32.965   | 62.699    | 257.399  |
| AMK58_06115 | K00331 NADH-quinone oxidoreductase subunit B [EC:1.6.5.3]   (GenBank) NADH dehydrogenase                                                                      | Energy                              | 979.970  | 768.649  | 865.406  | 48.088   | 1610.561  | 191.665  |
| AMK58_06120 | K00332 NADH-quinone oxidoreductase subunit C [EC:1.6.5.3]   (GenBank) NADH dehydrogenase                                                                      | Energy                              | 879.041  | 652.168  | 736.396  | 35.526   | 1199.348  | 171.078  |
| AMK58_06125 | K00333 NADH-quinone oxidoreductase subunit D [EC:1.6.5.3]   (GenBank) NADH dehydrogenase                                                                      | Energy                              | 523.063  | 406.627  | 407.606  | 30.435   | 603.066   | 117.259  |
| AMK58_06130 | K00334 NADH-quinone oxidoreductase subunit E [EC:1.6.5.3]   (GenBank) NADH dehydrogenase                                                                      | Energy                              | 1441.339 | 1123.659 | 1060.659 | 99.726   | 1410.921  | 381.317  |
| AMK58_06135 | K00335 NADH-quinone oxidoreductase subunit F [EC:1.6.5.3]   (GenBank) NADH dehydrogenase                                                                      | Energy                              | 207.222  | 184.056  | 176.106  | 44.529   | 134.304   | 92.299   |
| AMK58_06140 | K00336 NADH-quinone oxidoreductase subunit G [EC:1.6.5.3]   (GenBank) NADH dehydrogenase                                                                      | Energy                              | 397.427  | 307.383  | 297.653  | 46.205   | 227.801   | 144.093  |
| AMK58_06145 | K00337 NADH-quinone oxidoreductase subunit H [EC:1.6.5.3]   (GenBank) NADH:ubiquinone oxidoreductase                                                          | Energy                              | 907.881  | 759.130  | 825.873  | 238.867  | 478.682   | 432.644  |
| AMK58_06150 | K00338 NADH-quinone oxidoreductase subunit I [EC:1.6.5.3]   (GenBank) NADH dehydrogenase                                                                      | Energy                              | 1191.931 | 897.908  | 1025.241 | 96.184   | 364.863   | 385.712  |
| AMK58_06155 | K00339 NADH-quinone oxidoreductase subunit J [EC:1.6.5.3]   (GenBank) NADH:ubiquinone oxidoreductase                                                          | Energy                              | 403.583  | 319.923  | 310.728  | 88.873   | 124.586   | 185.473  |
| AMK58_06160 | K00340 NADH-quinone oxidoreductase subunit K [EC:1.6.5.3]   (GenBank) NADH-quinone oxidoreductase                                                             | Energy                              | 793.451  | 564.171  | 662.027  | 237.243  | 236.952   | 259.419  |
| AMK58_06165 | K00341 NADH-quinone oxidoreductase subunit L [EC:1.6.5.3]   (GenBank) NADH:ubiquinone oxidoreductase                                                          | Energy                              | 112.493  | 77.601   | 90.805   | 13.438   | 22.487    | 32.907   |
| AMK58_06170 | K00342 NADH-quinone oxidoreductase subunit M [EC:1.6.5.3]   (GenBank) NADH-quinone oxidoreductase                                                             | Energy                              | 994.922  | 762.674  | 785.930  | 100.052  | 228.426   | 266.300  |
| AMK58_06175 | K00343 NADH-quinone oxidoreductase subunit N [EC:1.6.5.3]   (GenBank) NADH-quinone oxidoreductase                                                             | Energy                              | 995.170  | 748.316  | 767.698  | 115.847  | 103.314   | 273.740  |
| AMK58_06180 | K03524 BirA family transcriptional regulator, biotin operon repressor / biotin-lactyl-CoA-carboxylase                                                         | Transcription                       | 1010.327 | 678.771  | 784.257  | 135.257  | 154.753   | 296.279  |
| AMK58_06185 | K03525 type III pantothenate kinase [EC:2.7.1.33]   (GenBank) type III pantothenate kinase                                                                    | Metabolism: Co-Factors and Vitamins | 53.342   | 60.747   | 55.923   | 293.569  | 20.221    | 137.799  |
| AMK58_06190 | K12574 ribonuclease J [EC:3.1.-.-1]   (GenBank) MBL fold metallo-hydrolase                                                                                    | Genetic Information Processing      | 58.497   | 61.860   | 50.661   | 75.424   | 25.656    | 80.103   |
| AMK58_06195 | K05606 methylmalonyl-CoA/ethylmalonyl-CoA epimerase [EC:5.1.99.1]   (GenBank) methylmalonyl-CoA epimerase                                                     | Metabolism                          | 203.286  | 223.258  | 214.036  | 855.781  | 194.563   | 563.566  |
| AMK58_06200 | no KO assigned   (GenBank) hypothetical protein                                                                                                               | Hypothetical                        | 195.470  | 229.498  | 168.286  | 134.829  | 100.020   | 256.101  |
| AMK58_06205 | K01246 DNA-3-methyladenine glycosylase I [EC:3.2.2.20]   (GenBank) DNA-3-methyladenine glycosylase I                                                          | DNA Repair and Replication          | 19.170   | 27.729   | 15.925   | 222.195  | 18.599    | 51.457   |
| AMK58_06210 | no KO assigned   (GenBank) hypothetical protein                                                                                                               | Hypothetical                        | 31.192   | 35.146   | 30.178   | 73.854   | 36.138    | 160.730  |
| AMK58_06215 | no KO assigned   (GenBank) hypothetical protein                                                                                                               | Hypothetical                        | 306.783  | 320.887  | 289.384  | 232.507  | 204.993   | 648.294  |
| AMK58_06220 | K01881 prolyl-tRNA synthetase [EC:6.1.1.15]   (GenBank) proline--tRNA ligase                                                                                  | tRNA synthesis/modification         | 17.046   | 17.616   | 17.522   | 58.259   | 14.707    | 33.835   |
| AMK58_06225 | K09808 lipoprotein-releasing system permease protein   (GenBank) multidrug ABC transporter substrate                                                          | Membrane Transport                  | 423.665  | 356.461  | 342.774  | 85.771   | 132.604   | 218.152  |
| AMK58_06230 | K09810 lipoprotein-releasing system ATP-binding protein [EC:3.6.3.-1]   (GenBank) ABC transporter                                                             | Membrane Transport                  | 122.479  | 99.592   | 117.788  | 201.910  | 126.231   | 353.243  |
| AMK58_06235 | K01061 carboxymethylenebutenolidase [EC:3.1.1.45]   (GenBank) carboxymethylenebutenolidase                                                                    | Metabolism                          | 23.707   | 16.861   | 28.310   | 123.057  | 45.523    | 73.145   |
| AMK58_06240 | K15268 O-acetylserine/cysteine efflux transporter   (GenBank) hypothetical protein                                                                            | Transport                           | 630.598  | 711.951  | 679.176  | 172.962  | 123.220   | 170.427  |
| AMK58_06245 | no KO assigned   (GenBank) hypothetical protein                                                                                                               | Hypothetical                        | 133.524  | 128.357  | 152.156  | 332.172  | 109.010   | 299.013  |
| AMK58_06250 | K02337 DNA polymerase III subunit alpha [EC:2.7.7.7]   (GenBank) DNA polymerase III subunit alpha                                                             | DNA Repair and Replication          | 4.206    | 6.230    | 5.751    | 45.634   | 7.111     | 35.135   |
| AMK58_06255 | K02967 small subunit ribosomal protein S2   (GenBank) 30S ribosomal protein S2                                                                                | Ribosome                            | 181.384  | 189.255  | 165.076  | 675.060  | 139.517   | 886.154  |
| AMK58_06260 | K02357 elongation factor Ts   (GenBank) elongation factor Ts                                                                                                  | Translation                         | 1560.042 | 1215.704 | 1447.899 | 182.416  | 3276.627  | 250.253  |
| AMK58_06265 | K09903 uridylyltransferase [EC:2.7.4.22]   (GenBank) pyrH; uridylyltransferase                                                                                | Signal Transduction                 | 972.602  | 807.556  | 909.379  | 195.438  | 1924.387  | 237.014  |
| AMK58_06270 | K02838 ribosome recycling factor   (GenBank) ribosome-recycling factor                                                                                        | Translation                         | 963.496  | 983.874  | 944.990  | 168.400  | 2029.926  | 460.908  |
| AMK58_06275 | K00806 undecaprenyl diphosphate synthase [EC:2.5.1.31]   (GenBank) UDP pyrophosphate synthase                                                                 | Biosynthesis: Terpenoid             | 304.328  | 341.094  | 325.078  | 125.485  | 641.371   | 163.536  |
| AMK58_06280 | K00981 phosphatidate cytidylyltransferase [EC:2.7.4.11]   (GenBank) phosphatidate cytidylyltransferase                                                        | Metabolism: Lipid                   | 250.809  | 252.204  | 263.171  | 113.509  | 674.730   | 183.101  |
| AMK58_06285 | K00099 1-deoxy-D-xylulose-5-phosphate reductoisomerase [EC:1.1.1.267]   (GenBank) 1-deoxy-D-xylulose 5-phosphate reductoisomerase                             | Biosynthesis: Terpenoid             | 39.443   | 53.447   | 44.946   | 162.594  | 169.802   | 59.670   |
| AMK58_06290 | K11749 regulator of sigma E protease [EC:3.4.24.-1]   (GenBank) RIP metalloprotease RseP                                                                      | Quorum Sensing                      | 43.027   | 69.529   | 48.322   | 145.166  | 144.134   | 93.855   |
| AMK58_06295 | K07277 outer membrane protein insertion porin family   (GenBank) outer membrane protein assembly factor                                                       | Membrane                            | 143.837  | 169.608  | 159.231  | 85.787   | 251.488   | 97.471   |
| AMK58_06300 | no KO assigned   (GenBank) hypothetical protein                                                                                                               | Hypothetical                        | 2272.191 | 2020.148 | 1914.871 | 424.372  | 730.296   | 873.338  |
| AMK58_06305 | K02372 3-hydroxyacyl-[acyl-carrier-protein] dehydratase [EC:4.2.1.59]   (GenBank) 3-hydroxyacyl-ACP dehydratase                                               | Metabolism: Lipid                   | 691.232  | 672.675  | 631.565  | 74.034   | 184.925   | 211.906  |
| AMK58_06310 | K00677 UDP-N-acetylglucosamine acyltransferase [EC:2.3.1.129]   (GenBank) UDP-N-acetylglucosamine acyltransferase                                             | Biosynthesis: Lipopolysaccharide    | 506.243  | 539.079  | 421.665  | 34.123   | 141.613   | 118.815  |
| AMK58_06315 | K09949 uncharacterized protein   (GenBank) UDP-2,3-diacetylglucosamine pyrophosphatase                                                                        | No COG                              | 274.465  | 281.448  | 252.633  | 74.840   | 104.774   | 152.090  |
| AMK58_06320 | K00748 lipid-A-disaccharide synthase [EC:2.4.1.182]   (GenBank) lipid-A-disaccharide synthase                                                                 | Biosynthesis: Lipopolysaccharide    | 12.891   | 15.403   | 13.765   | 145.981  | 26.416    | 47.813   |
| AMK58_06325 | K01759 lactoylglutathione lyase [EC:4.4.1.51]   (GenBank) glyoxalase I                                                                                        | Metabolism: Carbohydrate            | 57.480   | 63.933   | 59.594   | 676.184  | 168.054   | 313.845  |
| AMK58_06330 | no KO assigned   (GenBank) hypothetical protein                                                                                                               | Hypothetical                        | 120.387  | 154.809  | 118.389  | 37.782   | 181.973   | 92.282   |
| AMK58_06335 | K03566 LysR family transcriptional regulator, glycine cleavage system transcriptional activator   (GenBank) glycine cleavage system transcriptional activator | Transcription                       | 19.588   | 26.704   | 22.874   | 77.835   | 66.347    | 130.067  |
| AMK58_06340 | K00799 glutathione S-transferase [EC:2.5.1.18]   (GenBank) glutathione S-transferase                                                                          | Metabolism: Amino Acid              | 9.543    | 22.568   | 17.958   | 406.929  | 66.147    | 219.378  |
| AMK58_06345 | no KO assigned   (GenBank) hypothetical protein                                                                                                               | Hypothetical                        | 280.168  | 241.119  | 276.397  | 196.660  | 110.452   | 424.130  |
| AMK58_06350 | K01647 citrate synthase [EC:2.3.3.1]   (GenBank) gltA; type II citrate synthase                                                                               | Metabolism                          | 7.003    | 5.505    | 8.849    | 22.834   | 2.382     | 8.288    |
| AMK58_06355 | K01885 glutamyl-tRNA synthetase [EC:6.1.1.17]   (GenBank) glutamate--tRNA ligase                                                                              | tRNA synthesis/modification         | 1807.125 | 1384.768 | 1566.774 | 156.906  | 304.645   | 191.486  |
| AMK58_06360 | K02238 competence protein ComEC   (GenBank) competence protein ComEC                                                                                          | Secretion System                    | 76.184   | 69.497   | 75.136   | 101.394  | 65.192    | 105.889  |

|                             |                                                                                                                                                     |                                       |          |          |          |          |          |          |
|-----------------------------|-----------------------------------------------------------------------------------------------------------------------------------------------------|---------------------------------------|----------|----------|----------|----------|----------|----------|
| <a href="#">AMK58_06365</a> | <a href="#">K01356 repressor LexA [EC:3.4.21.88] (GenBank) LexA family transcriptional regulator</a>                                                | Transcription                         | 34.469   | 31.045   | 52.207   | 693.292  | 124.801  | 432.054  |
| <a href="#">AMK58_06370</a> | <a href="#">K03750 molybdopterin molybdotransferase [EC:2.10.1.11] (GenBank) molybdenum cofactor biosynthesis</a>                                   | Biosynthesis: Co-Factors and Vitamins | 62.625   | 54.044   | 73.721   | 67.910   | 56.426   | 89.041   |
| <a href="#">AMK58_06375</a> | <a href="#">K03637 cvclic pyranopterin monophosphate synthase [EC:4.6.1.17] (GenBank) moaC: molybdenum cofactor biosynthesis</a>                    | Biosynthesis: Co-Factors and Vitamins | 57.480   | 78.912   | 87.211   | 380.727  | 61.861   | 143.342  |
| <a href="#">AMK58_06380</a> | <a href="#">K03829 putative acetyltransferase [EC:2.3.1.-1] (GenBank) GCN5 family acetyltransferase</a>                                             | Acetyltransferase                     | 134.443  | 123.573  | 138.383  | 94.946   | 93.281   | 141.039  |
| <a href="#">AMK58_06385</a> | <a href="#">K01609 indole-3-glycerol phosphate synthase [EC:4.1.1.48] (GenBank) indole-3-glycerol phosphate synthase</a>                            | Biosynthesis: Amino Acid (IAA)        | 57.085   | 56.842   | 44.063   | 139.780  | 37.602   | 149.266  |
| <a href="#">AMK58_06390</a> | <a href="#">K00766 anthranilate phosphoribosyltransferase [EC:2.4.2.18] (GenBank) anthranilate phosphoribosyltransferase</a>                        | Biosynthesis: Amino Acid (IAA)        | 47.799   | 47.146   | 41.481   | 133.796  | 30.792   | 113.420  |
| <a href="#">AMK58_06395</a> | <a href="#">K01658 anthranilate synthase component II [EC:4.1.3.27] (GenBank) anthranilate synthase</a>                                             | Biosynthesis: Amino Acid (IAA)        | 141.356  | 139.531  | 147.454  | 291.715  | 96.946   | 204.593  |
| <a href="#">AMK58_06400</a> | <a href="#">no KO assigned (GenBank) hypothetical protein</a>                                                                                       | Hypothetical                          | 181.211  | 178.843  | 188.561  | 190.828  | 184.462  | 209.917  |
| <a href="#">AMK58_06405</a> | <a href="#">K09798 uncharacterized protein I (GenBank) hypothetical protein</a>                                                                     | Hypothetical                          | 3.456    | 3.037    | 5.896    | 55.151   | 10.056   | 43.456   |
| <a href="#">AMK58_06410</a> | <a href="#">K07213 copper chaperone I (GenBank) heavy metal transporter</a>                                                                         | Chaperone                             | 81.886   | 80.373   | 111.226  | 1186.229 | 186.060  | 484.875  |
| <a href="#">AMK58_06415</a> | <a href="#">no KO assigned (GenBank) hypothetical protein</a>                                                                                       | Hypothetical                          | 6.221    | 8.158    | 9.954    | 31.909   | 12.450   | 27.012   |
| <a href="#">AMK58_06420</a> | <a href="#">K01657 anthranilate synthase component I [EC:4.1.3.27] (GenBank) anthranilate synthase</a>                                              | Biosynthesis: Amino Acid (IAA)        | 13.613   | 17.701   | 14.999   | 86.671   | 22.772   | 62.521   |
| <a href="#">AMK58_06425</a> | <a href="#">K03770 peptidyl-prolyl cis-trans isomerase D [EC:5.2.1.8] (GenBank) peptidylprolyl isomerase</a>                                        | Chaperone                             | 70.771   | 71.301   | 75.221   | 158.146  | 34.763   | 113.519  |
| <a href="#">AMK58_06430</a> | <a href="#">K01803 triosephosphate isomerase (TIM) [EC:5.3.1.1] (GenBank) triosephosphate isomerase</a>                                             | Metabolism                            | 305.890  | 300.441  | 304.852  | 513.374  | 148.334  | 386.558  |
| <a href="#">AMK58_06435</a> | <a href="#">K03075 preprotein translocase subunit SecE (GenBank) preprotein translocase subunit SecG</a>                                            | Secretion System                      | 678.819  | 490.926  | 603.251  | 447.594  | 189.631  | 377.267  |
| <a href="#">AMK58_06440</a> | <a href="#">K01937 CTP synthase [EC:6.3.4.2] (GenBank) CTP synthetase</a>                                                                           | Metabolism: Nucleotides               | 91.196   | 94.138   | 97.664   | 31.262   | 132.083  | 35.976   |
| <a href="#">AMK58_06445</a> | <a href="#">K01061 carboxymethylglutaminase [EC:3.1.1.45] (GenBank) carboxymethylglutaminase</a>                                                    | Metabolism                            | 429.218  | 334.254  | 382.248  | 188.173  | 500.177  | 413.262  |
| <a href="#">AMK58_06450</a> | <a href="#">K01627 2-dehydro-3-deoxyphosphoacetate aldolase (KDO 8-P synthase) [EC:2.5.1.55] (GenBank) 2-dehydro-3-deoxyphosphoacetate aldolase</a> | Biosynthesis: Lipopolysaccharide      | 495.120  | 469.133  | 498.432  | 113.608  | 291.746  | 244.065  |
| <a href="#">AMK58_06455</a> | <a href="#">no KO assigned (GenBank) DNA-binding protein</a>                                                                                        | No COG                                | 280.849  | 279.103  | 269.399  | 299.562  | 272.186  | 350.907  |
| <a href="#">AMK58_06460</a> | <a href="#">K06139 pyrroloquinoline quinone biosynthesis protein E (GenBank) pyrroloquinoline quinone biosynthesis protein E</a>                    | Biosynthesis: quinone                 | 15.421   | 13.722   | 20.382   | 69.152   | 96.999   | 73.528   |
| <a href="#">AMK58_06465</a> | <a href="#">K06138 pyrroloquinoline quinone biosynthesis protein D (GenBank) pyrroloquinoline quinone biosynthesis protein D</a>                    | Biosynthesis: quinone                 | 266.112  | 318.980  | 288.597  | 685.911  | 798.130  | 815.125  |
| <a href="#">AMK58_06470</a> | <a href="#">K06137 pyrroloquinoline-quinone synthase [EC:1.3.3.11] (GenBank) pyrroloquinoline quinone biosynthesis protein C</a>                    | Biosynthesis: quinone                 | 24.932   | 28.860   | 32.002   | 61.368   | 24.521   | 38.290   |
| <a href="#">AMK58_06475</a> | <a href="#">K06136 pyrroloquinoline quinone biosynthesis protein B (GenBank) pyrroloquinoline quinone biosynthesis protein B</a>                    | Biosynthesis: quinone                 | 149.977  | 147.005  | 152.007  | 78.651   | 99.363   | 139.190  |
| <a href="#">AMK58_06480</a> | <a href="#">no KO assigned (GenBank) pyrroloquinoline quinone biosynthesis protein PqqA</a>                                                         | Biosynthesis: quinone                 | 2709.983 | 3009.516 | 3514.681 | 2176.494 | 3472.897 | 1094.976 |
| <a href="#">AMK58_06485</a> | <a href="#">K01689 enolase [EC:4.2.1.11] (GenBank) eno: enolase</a>                                                                                 | Metabolism: Carbohydrate              | 327.129  | 323.755  | 287.617  | 7.107    | 293.058  | 28.990   |
| <a href="#">AMK58_06490</a> | <a href="#">no KO assigned (GenBank) hypothetical protein</a>                                                                                       | Hypothetical                          | 929.042  | 906.190  | 926.161  | 141.062  | 345.941  | 194.923  |
| <a href="#">AMK58_06495</a> | <a href="#">K04075 tRNA(Ile)-lysidine synthase [EC:6.3.4.19] (GenBank) tRNA(Ile)-lysidine synthetase</a>                                            | tRNA synthesis/modification           | 60.849   | 65.469   | 50.486   | 68.144   | 55.779   | 108.552  |
| <a href="#">AMK58_06500</a> | <a href="#">K03798 cell division protease FtsH [EC:3.4.24.-1] (GenBank) cell division protein FtsH</a>                                              | Cell Cycle/Shape/Homeostasis          | 6.685    | 9.331    | 11.821   | 120.008  | 31.952   | 74.846   |
| <a href="#">AMK58_06505</a> | <a href="#">no KO assigned (GenBank) hypothetical protein</a>                                                                                       | Hypothetical                          | 4771.994 | 4306.672 | 4558.240 | 427.200  | 9631.880 | 693.475  |
| <a href="#">AMK58_06510</a> | <a href="#">no KO assigned (GenBank) hypothetical protein</a>                                                                                       | Hypothetical                          | 91.479   | 73.943   | 86.979   | 421.683  | 464.531  | 956.538  |
| <a href="#">AMK58_06515</a> | <a href="#">no KO assigned (GenBank) peroxiredoxin</a>                                                                                              | Cell Cycle/Shape/Homeostasis          | 21.661   | 31.332   | 21.896   | 64.141   | 45.877   | 135.738  |
| <a href="#">AMK58_06520</a> | <a href="#">K01745 histidine ammonia-lyase [EC:4.3.1.3] (GenBank) histidine ammonia-lyase</a>                                                       | Biosynthesis: Amino Acid              | 55.661   | 64.425   | 49.606   | 30.695   | 126.200  | 83.228   |
| <a href="#">AMK58_06525</a> | <a href="#">no KO assigned (GenBank) ABC transporter ATP-binding protein</a>                                                                        | Membrane Transport                    | 17.174   | 16.673   | 22.724   | 31.225   | 122.580  | 86.392   |
| <a href="#">AMK58_06530</a> | <a href="#">no KO assigned (GenBank) protein secretion protein</a>                                                                                  | Secretion System                      | 15.379   | 16.464   | 23.582   | 294.959  | 66.448   | 195.359  |
| <a href="#">AMK58_06535</a> | <a href="#">no KO assigned (GenBank) regulator</a>                                                                                                  | Signal Transduction                   | 32.748   | 27.556   | 41.004   | 482.851  | 218.008  | 509.170  |
| <a href="#">AMK58_06540</a> | <a href="#">no KO assigned (GenBank) hypothetical protein</a>                                                                                       | Hypothetical                          | 316.721  | 418.733  | 433.473  | 123.252  | 32.857   | 121.972  |
| <a href="#">AMK58_06545</a> | <a href="#">no KO assigned (GenBank) hypothetical protein</a>                                                                                       | Hypothetical                          | 11.225   | 14.846   | 11.325   | 82.872   | 18.396   | 68.490   |
| <a href="#">AMK58_06550</a> | <a href="#">no KO assigned (GenBank) esterase</a>                                                                                                   | Esterase                              | 747.870  | 669.568  | 626.660  | 277.795  | 1234.959 | 468.510  |
| <a href="#">AMK58_06555</a> | <a href="#">K03980 putative peptidoglycan lipid II flippase I (GenBank) multidrug transporter MurJ</a>                                              | Cell Wall                             | 52.380   | 54.100   | 48.764   | 76.753   | 43.522   | 100.760  |
| <a href="#">AMK58_06560</a> | <a href="#">K01011 thiosulfate/3-mercaptopyruvate sulfoxidase [EC:2.8.1.2.8.1.2] (GenBank) sulfurtransferase</a>                                    | Metabolism                            | 51.417   | 61.781   | 60.905   | 460.392  | 68.612   | 233.995  |
| <a href="#">AMK58_06565</a> | <a href="#">K02417 flagellar motor switch protein Flin/FljY (GenBank) flagellar motor switch protein Flin</a>                                       | Motility                              | 171.288  | 199.063  | 267.272  | 832.303  | 150.863  | 614.872  |
| <a href="#">AMK58_06570</a> | <a href="#">no KO assigned (GenBank) hypothetical protein</a>                                                                                       | Hypothetical                          | 125.798  | 194.947  | 185.742  | 100.647  | 216.205  | 277.887  |
| <a href="#">AMK58_06575</a> | <a href="#">K01751 diamino propionate ammonia-lyase [EC:4.3.1.15] (GenBank) PLP-dependent lyase/thiolase</a>                                        | Lyase                                 | 9.230    | 7.040    | 17.179   | 26.044   | 42.936   | 53.176   |
| <a href="#">AMK58_06580</a> | <a href="#">no KO assigned (GenBank) aspartate aminotransferase</a>                                                                                 | tRNA synthesis/modification           | 58.898   | 70.377   | 68.175   | 254.530  | 42.025   | 113.789  |
| <a href="#">AMK58_06585</a> | <a href="#">no KO assigned (GenBank) hypothetical protein</a>                                                                                       | Hypothetical                          | 115.985  | 127.076  | 127.910  | 379.895  | 79.286   | 254.208  |
| <a href="#">AMK58_06590</a> | <a href="#">no KO assigned (GenBank) hypothetical protein</a>                                                                                       | Hypothetical                          | 31.178   | 36.220   | 48.913   | 256.156  | 27.452   | 156.117  |
| <a href="#">AMK58_06595</a> | <a href="#">K02049 NiT/TauT family transport system ATP-binding protein I (GenBank) mannosyltransferase</a>                                         | Transport: NiT/TauT                   | 1.699    | 2.538    | 3.635    | 168.256  | 73.697   | 125.532  |
| <a href="#">AMK58_06600</a> | <a href="#">K02050 NiT/TauT family transport system permease protein I (GenBank) ABC transporter permease</a>                                       | Transport: NiT/TauT                   | 202.539  | 216.114  | 204.230  | 167.192  | 93.081   | 139.852  |
| <a href="#">AMK58_06605</a> | <a href="#">K02051 NiT/TauT family transport system substrate-binding protein I (GenBank) ABC transporter substrate-binding protein I</a>           | Transport: NiT/TauT                   | 360.732  | 303.526  | 285.653  | 51.995   | 97.400   | 177.540  |
| <a href="#">AMK58_06610</a> | <a href="#">no KO assigned (GenBank) nitrogen fixation protein NifO</a>                                                                             | Nitrogen                              | 3061.342 | 2411.185 | 2640.807 | 319.116  | 358.820  | 550.953  |
| <a href="#">AMK58_06615</a> | <a href="#">no KO assigned (GenBank) hypothetical protein</a>                                                                                       | Hypothetical                          | 120.144  | 179.970  | 125.182  | 47.363   | 31.245   | 38.448   |
| <a href="#">AMK58_06620</a> | <a href="#">no KO assigned (GenBank) hypothetical protein</a>                                                                                       | Hypothetical                          | 61.188   | 81.484   | 80.459   | 239.999  | 101.460  | 145.899  |
| <a href="#">AMK58_06625</a> | <a href="#">no KO assigned (GenBank) histidine kinase</a>                                                                                           | Signal Transduction                   | 10.147   | 13.990   | 14.494   | 112.429  | 40.720   | 76.592   |
| <a href="#">AMK58_06630</a> | <a href="#">no KO assigned (GenBank) regulator</a>                                                                                                  | Signal Transduction                   | 23.062   | 22.964   | 28.140   | 269.881  | 50.981   | 193.235  |
| <a href="#">AMK58_06635</a> | <a href="#">K03406 methyl-accepting chemotaxis protein I (GenBank) chemotaxis protein</a>                                                           | Chemotaxis                            | 10.628   | 7.294    | 12.427   | 224.232  | 29.059   | 219.212  |
| <a href="#">AMK58_06640</a> | <a href="#">no KO assigned (GenBank) alpha/beta hydrolase</a>                                                                                       | Hydrolase                             | 34.654   | 40.896   | 46.509   | 418.359  | 163.664  | 423.425  |
| <a href="#">AMK58_06645</a> | <a href="#">no KO assigned (GenBank) hypothetical protein</a>                                                                                       | Hypothetical                          | 115.819  | 115.513  | 117.439  | 261.006  | 394.565  | 190.423  |
| <a href="#">AMK58_06650</a> | <a href="#">no KO assigned (GenBank) cupin</a>                                                                                                      | No COG                                | 68.319   | 96.132   | 83.267   | 325.785  | 279.302  | 224.784  |
| <a href="#">AMK58_06655</a> | <a href="#">no KO assigned (GenBank) hypothetical protein</a>                                                                                       | Hypothetical                          | 23.431   | 26.902   | 29.890   | 90.699   | 36.460   | 41.831   |
| <a href="#">AMK58_06660</a> | <a href="#">no KO assigned (GenBank) hypothetical protein</a>                                                                                       | Hypothetical                          | 165.836  | 173.167  | 219.424  | 1046.836 | 615.719  | 729.072  |
| <a href="#">AMK58_06665</a> | <a href="#">no KO assigned (GenBank) histidine kinase</a>                                                                                           | Signal Transduction                   | 24.933   | 37.241   | 28.529   | 81.234   | 21.495   | 86.211   |
| <a href="#">AMK58_06670</a> | <a href="#">no KO assigned (GenBank) AAA family ATPase</a>                                                                                          | Biosynthesis                          | 52.053   | 53.430   | 68.461   | 458.298  | 94.080   | 419.735  |
| <a href="#">AMK58_06675</a> | <a href="#">no KO assigned (GenBank) hypothetical protein</a>                                                                                       | Hypothetical                          | 57.776   | 53.300   | 54.530   | 233.320  | 145.644  | 387.626  |
| <a href="#">AMK58_06680</a> | <a href="#">K03926 periplasmic divalent cation tolerance protein I (GenBank) dihydroorotate dehydrogenase</a>                                       | Membrane                              | 51.889   | 64.298   | 76.015   | 311.500  | 91.593   | 178.919  |
| <a href="#">AMK58_06685</a> | <a href="#">no KO assigned (GenBank) MES transporter</a>                                                                                            | Transport: MFS                        | 21.557   | 28.229   | 24.896   | 47.733   | 33.525   | 68.457   |
| <a href="#">AMK58_06690</a> | <a href="#">no KO assigned (GenBank) hypothetical protein</a>                                                                                       | Hypothetical                          | 1306.054 | 1516.896 | 1648.777 | 367.774  | 709.218  | 307.116  |
| <a href="#">AMK58_06695</a> | <a href="#">K01740 O-acetylhomoserine (thio)-lyase [EC:2.5.1.49] (GenBank) O-acetylhomoserine aminocarboxypr</a>                                    | Metabolism: Amino Acid                | 67.483   | 73.457   | 97.450   | 105.484  | 54.859   | 50.652   |

|                             |                                                                                                                                       |                                     |          |          |          |          |          |          |
|-----------------------------|---------------------------------------------------------------------------------------------------------------------------------------|-------------------------------------|----------|----------|----------|----------|----------|----------|
| <a href="#">AMK58_06700</a> | <a href="#">K06929 uncharacterized protein</a>   (GenBank) <a href="#">hypothetical protein</a>                                       | Hypothetical                        | 1508.186 | 1121.968 | 1199.766 | 511.245  | 297.097  | 563.295  |
| <a href="#">AMK58_06705</a> | <a href="#">no KO assigned</a>   (GenBank) <a href="#">enoyl-CoA hydratase</a>                                                        | Hydratase                           | 91.069   | 69.019   | 82.309   | 85.414   | 33.560   | 91.123   |
| <a href="#">AMK58_06710</a> | <a href="#">no KO assigned</a>   (GenBank) <a href="#">thioesterase</a>                                                               | Esterase                            | 273.768  | 256.476  | 277.410  | 249.305  | 102.287  | 250.521  |
| <a href="#">AMK58_06715</a> | <a href="#">K02871 large subunit ribosomal protein L13</a>   (GenBank) <a href="#">50S ribosomal protein L13</a>                      | Ribosome                            | 195.022  | 241.119  | 210.680  | 156.954  | 80.778   | 365.299  |
| <a href="#">AMK58_06720</a> | <a href="#">K02996 small subunit ribosomal protein S9</a>   (GenBank) <a href="#">30S ribosomal protein S9</a>                        | Ribosome                            | 1142.314 | 933.024  | 964.806  | 103.423  | 1308.523 | 235.464  |
| <a href="#">AMK58_06725</a> | <a href="#">K00145 N-acetyl-gamma-glutamyl-phosphate reductase</a> [EC:1.2.1.38]   (GenBank) <a href="#">argC: N-acetyl-gamma-</a>    | Biosynthesis: Amino Acid            | 191.673  | 155.250  | 176.013  | 139.082  | 289.505  | 115.575  |
| <a href="#">AMK58_06730</a> | <a href="#">no KO assigned</a>   (GenBank) <a href="#">carbonic anhydrase</a>                                                         | Enzyme                              | 187.328  | 154.706  | 168.797  | 300.622  | 194.831  | 439.777  |
| <a href="#">AMK58_06735</a> | <a href="#">K03286 OmpA-OmpF porin_OOP family</a>   (GenBank) <a href="#">hypothetical protein</a>                                    | Transport: Ion                      | 287.038  | 290.326  | 247.271  | 43.029   | 156.692  | 196.663  |
| <a href="#">AMK58_06740</a> | <a href="#">K03821 polyhydroxyalkanoate synthase</a> [EC:2.3.1.-]   (GenBank) <a href="#">poly(3-hydroxyalkanoate) synthetase</a>     | Metabolism: Carbohydrate (cyst)     | 1080.929 | 1174.247 | 1380.404 | 63.883   | 125.886  | 68.859   |
| <a href="#">AMK58_06745</a> | <a href="#">no KO assigned</a>   (GenBank) <a href="#">hypothetical protein</a>                                                       | Hypothetical                        | 4040.412 | 3408.539 | 3194.841 | 283.006  | 773.944  | 916.585  |
| <a href="#">AMK58_06750</a> | <a href="#">no KO assigned</a>   (GenBank) <a href="#">MarR family transcriptional regulator</a>                                      | Transcription                       | 180.060  | 166.928  | 190.255  | 269.554  | 117.694  | 167.750  |
| <a href="#">AMK58_06755</a> | <a href="#">K07552 MFS transporter_DHA1 family_bicyclomycin/chloramphenicol resistance protein</a>   (GenBank) <a href="#">mu</a>     | Transport: MFS                      | 4.513    | 6.222    | 5.859    | 91.963   | 9.463    | 28.651   |
| <a href="#">AMK58_06760</a> | <a href="#">no KO assigned</a>   (GenBank) <a href="#">hypothetical protein</a>                                                       | Hypothetical                        | 54.667   | 56.992   | 63.664   | 450.189  | 67.016   | 221.137  |
| <a href="#">AMK58_06765</a> | <a href="#">K14261 alanine-synthesizing transaminase</a> [EC:2.6.1.-]   (GenBank) <a href="#">aminotransferase</a>                    | tRNA synthesis/modification         | 99.234   | 89.072   | 80.809   | 54.698   | 67.016   | 95.011   |
| <a href="#">AMK58_06770</a> | <a href="#">K00003 homoserine dehydrogenase</a> [EC:1.1.1.31]   (GenBank) <a href="#">homoserine dehydrogenase</a>                    | Biosynthesis: Amino Acid            | 513.920  | 397.071  | 397.196  | 101.924  | 90.000   | 225.569  |
| <a href="#">AMK58_06775</a> | <a href="#">K11532 fructose-1,6-bisphosphatase II / sedoheptulose-1,7-bisphosphatase</a> [EC:3.1.3.11 3.1.3.37]   (G                  | Metabolism                          | 356.331  | 324.237  | 316.637  | 189.049  | 84.107   | 147.020  |
| <a href="#">AMK58_06780</a> | <a href="#">K00005 glycerol dehydrogenase</a> [EC:1.1.1.61]   (GenBank) <a href="#">glda: glycerol dehydrogenase</a>                  | Metabolism                          | 441.391  | 415.333  | 451.726  | 203.326  | 80.634   | 143.833  |
| <a href="#">AMK58_06785</a> | <a href="#">K07462 single-stranded-DNA-specific exonuclease</a> [EC:3.1.-.-]   (GenBank) <a href="#">single-stranded-DNA-specifi</a>  | DNA Repair and Replication          | 62.488   | 58.672   | 69.455   | 133.173  | 32.738   | 96.864   |
| <a href="#">AMK58_06790</a> | <a href="#">K14224 tRNA_Glu</a>   (GenBank) <a href="#">tRNA-Glu</a>                                                                  | tRNA synthesis/modification         | 454.030  | 599.624  | 633.154  | 4652.174 | 560.489  | 3174.573 |
| <a href="#">AMK58_06795</a> | <a href="#">K01153 type I restriction enzyme_R subunit</a> [EC:3.1.21.31]   (GenBank) <a href="#">restriction endonuclease</a>        | DNA Repair and Replication          | 13.502   | 15.956   | 20.221   | 17.557   | 9.117    | 27.746   |
| <a href="#">AMK58_06800</a> | <a href="#">K03427 type I restriction enzyme M protein</a> [EC:2.1.1.72]   (GenBank) <a href="#">DNA methyltransferase</a>            | DNA Repair and Replication          | 321.454  | 333.895  | 263.716  | 93.663   | 147.388  | 362.143  |
| <a href="#">AMK58_06805</a> | <a href="#">no KO assigned</a>   (GenBank) <a href="#">hypothetical protein</a>                                                       | Hypothetical                        | 1071.915 | 1003.053 | 882.579  | 595.402  | 352.028  | 1780.348 |
| <a href="#">AMK58_06810</a> | <a href="#">no KO assigned</a>   (GenBank) <a href="#">hypothetical protein</a>                                                       | Hypothetical                        | 144.911  | 131.862  | 108.643  | 34.296   | 14.176   | 151.798  |
| <a href="#">AMK58_06815</a> | <a href="#">no KO assigned</a>   (GenBank) <a href="#">hypothetical protein</a>                                                       | Hypothetical                        | 312.611  | 222.343  | 237.000  | 118.316  | 28.260   | 507.974  |
| <a href="#">AMK58_06820</a> | <a href="#">no KO assigned</a>   (GenBank) <a href="#">hypothetical protein</a>                                                       | Hypothetical                        | 128.413  | 131.519  | 125.584  | 205.014  | 363.504  | 1020.633 |
| <a href="#">AMK58_06825</a> | <a href="#">no KO assigned</a>   (GenBank) <a href="#">hypothetical protein</a>                                                       | Hypothetical                        | 46.018   | 48.518   | 44.924   | 31.976   | 190.033  | 137.142  |
| <a href="#">AMK58_06830</a> | <a href="#">no KO assigned</a>   (GenBank) <a href="#">hypothetical protein</a>                                                       | Hypothetical                        | 60.414   | 45.857   | 71.096   | 80.927   | 254.931  | 252.779  |
| <a href="#">AMK58_06835</a> | <a href="#">no KO assigned</a>   (GenBank) <a href="#">hypothetical protein</a>                                                       | Hypothetical                        | 56.657   | 68.008   | 54.177   | 44.272   | 18.248   | 156.290  |
| <a href="#">AMK58_06840</a> | <a href="#">no KO assigned</a>   (GenBank) <a href="#">hypothetical protein</a>                                                       | Hypothetical                        | 378.114  | 370.456  | 313.224  | 151.557  | 156.904  | 587.508  |
| <a href="#">AMK58_06845</a> | <a href="#">no KO assigned</a>   (GenBank) <a href="#">hypothetical protein</a>                                                       | Hypothetical                        | 276.887  | 234.229  | 249.836  | 80.707   | 17.498   | 235.633  |
| <a href="#">AMK58_06850</a> | <a href="#">no KO assigned</a>   (GenBank) <a href="#">hypothetical protein</a>                                                       | Hypothetical                        | 98.848   | 118.812  | 132.359  | 704.372  | 554.892  | 1913.466 |
| <a href="#">AMK58_06855</a> | <a href="#">K08177 MFS transporter_OFA family_oxalate/formate antiporter</a>   (GenBank) <a href="#">oxalate/formate MFS antipt</a>   | Transport: MFS                      | 15.623   | 20.001   | 22.193   | 116.345  | 25.923   | 115.029  |
| <a href="#">AMK58_06860</a> | <a href="#">no KO assigned</a>   (GenBank) <a href="#">acetoin utilization protein</a>                                                | No COG                              | 14.190   | 19.445   | 18.568   | 33.309   | 34.389   | 71.708   |
| <a href="#">AMK58_06865</a> | <a href="#">no KO assigned</a>   (GenBank) <a href="#">GCN5 family acetyltransferase</a>                                              | Acetyltransferase                   | 123.582  | 101.839  | 95.575   | 354.929  | 137.220  | 518.114  |
| <a href="#">AMK58_06870</a> | <a href="#">K00077 2-dehydropanoate 2-reductase</a> [EC:1.1.1.169]   (GenBank) <a href="#">2-dehydropanoate 2-reductase</a>           | Metabolism: Co-Factors and Vitamins | 9.087    | 8.460    | 11.220   | 134.997  | 35.151   | 160.198  |
| <a href="#">AMK58_06875</a> | <a href="#">no KO assigned</a>   (GenBank) <a href="#">histidine kinase</a>                                                           | Signal Transduction                 | 48.324   | 47.589   | 46.199   | 82.516   | 80.880   | 292.246  |
| <a href="#">AMK58_06880</a> | <a href="#">K00324 NAD(P) transhydrogenase subunit alpha</a> [EC:1.6.1.2]   (GenBank) <a href="#">NAD(P) transhydrogenase sub</a>     | Energy                              | 18.095   | 12.754   | 18.365   | 282.702  | 50.964   | 276.951  |
| <a href="#">AMK58_06885</a> | <a href="#">K00324 NAD(P) transhydrogenase subunit alpha</a> [EC:1.6.1.2]   (GenBank) <a href="#">NAD(P) transhydrogenase sub</a>     | Energy                              | 14.473   | 6.652    | 15.614   | 177.472  | 63.823   | 196.407  |
| <a href="#">AMK58_06890</a> | <a href="#">K00325 NAD(P) transhydrogenase subunit beta</a> [EC:1.6.1.2]   (GenBank) <a href="#">NAD synthetase</a>                   | Energy                              | 1.215    | 1.037    | 2.311    | 73.361   | 20.292   | 87.723   |
| <a href="#">AMK58_06895</a> | <a href="#">no KO assigned</a>   (GenBank) <a href="#">hypothetical protein</a>                                                       | Hypothetical                        | 2.070    | 2.061    | 1.804    | 17.097   | 15.121   | 41.741   |
| <a href="#">AMK58_06900</a> | <a href="#">no KO assigned</a>   (GenBank) <a href="#">GntR family transcriptional regulator</a>                                      | Transcription                       | 8.247    | 7.338    | 7.007    | 146.672  | 61.341   | 95.836   |
| <a href="#">AMK58_06905</a> | <a href="#">K01577 oxalyl-CoA decarboxylase</a> [EC:4.1.1.81]   (GenBank) <a href="#">oxalyl-CoA decarboxylase</a>                    | Metabolism: Carbohydrate            | 19.973   | 23.865   | 30.122   | 75.558   | 15.328   | 71.270   |
| <a href="#">AMK58_06910</a> | <a href="#">no KO assigned</a>   (GenBank) <a href="#">formyl-coenzyme A transferase</a>                                              | Stress Response                     | 12.032   | 13.018   | 13.512   | 25.254   | 13.418   | 23.368   |
| <a href="#">AMK58_06915</a> | <a href="#">K01903 succinyl-CoA synthetase beta subunit</a> [EC:6.2.1.51]   (GenBank) <a href="#">sucC: succinyl-CoA synthetase s</a> | Metabolism                          | 41.774   | 36.258   | 47.509   | 163.947  | 34.791   | 102.703  |
| <a href="#">AMK58_06920</a> | <a href="#">K01902 succinyl-CoA synthetase alpha subunit</a> [EC:6.2.1.51]   (GenBank) <a href="#">succinate--CoA liase</a>           | Metabolism                          | 49.342   | 34.681   | 54.931   | 165.148  | 94.457   | 216.209  |
| <a href="#">AMK58_06925</a> | <a href="#">no KO assigned</a>   (GenBank) <a href="#">MFS transporter</a>                                                            | Transport: MFS                      | 7.750    | 4.810    | 8.804    | 108.663  | 136.659  | 149.133  |
| <a href="#">AMK58_06930</a> | <a href="#">no KO assigned</a>   (GenBank) <a href="#">oxalate/formate MFS antiporter</a>                                             | Transport: MFS                      | 3.722    | 5.852    | 6.054    | 51.962   | 60.339   | 34.517   |
| <a href="#">AMK58_06935</a> | <a href="#">no KO assigned</a>   (GenBank) <a href="#">hypothetical protein</a>                                                       | Hypothetical                        | 46.764   | 61.236   | 73.091   | 1935.933 | 95.049   | 1033.000 |
| <a href="#">AMK58_06940</a> | <a href="#">K03147 phosphomethylpyrimidine synthase</a> [EC:4.1.99.17]   (GenBank) <a href="#">phosphomethylpyrimidine syntha</a>     | Metabolism: Co-Factors and Vitamins | 47.523   | 37.699   | 37.561   | 52.917   | 20.466   | 104.956  |
| <a href="#">AMK58_06945</a> | <a href="#">K08177 MFS transporter_OFA family_oxalate/formate antiporter</a>   (GenBank) <a href="#">oxalate/formate MFS antipt</a>   | Transport: MFS                      | 5.686    | 6.682    | 9.748    | 13.859   | 12.153   | 38.288   |
| <a href="#">AMK58_06950</a> | <a href="#">K11529 glycerate 2-kinase</a> [EC:2.7.1.165]   (GenBank) <a href="#">hydroxypyruvate reductase</a>                        | Metabolism                          | 1409.472 | 1478.784 | 1346.609 | 197.371  | 250.851  | 261.963  |
| <a href="#">AMK58_06955</a> | <a href="#">no KO assigned</a>   (GenBank) <a href="#">2-hydroxy-3-oxopropionate reductase</a>                                        | Metabolism: Carbohydrate            | 524.791  | 450.406  | 492.137  | 294.040  | 88.333   | 260.357  |
| <a href="#">AMK58_06960</a> | <a href="#">K01816 hydroxypyruvate isomerase</a> [EC:5.3.1.22]   (GenBank) <a href="#">hydroxypyruvate isomerase</a>                  | Metabolism: Carbohydrate            | 89.061   | 76.143   | 106.608  | 364.613  | 128.589  | 292.351  |
| <a href="#">AMK58_06965</a> | <a href="#">K01608 tartronate-semialdehyde synthase</a> [EC:4.1.1.47]   (GenBank) <a href="#">glyoxylate carboligase</a>              | Metabolism: Carbohydrate            | 14.091   | 13.895   | 15.609   | 103.634  | 36.368   | 139.861  |
| <a href="#">AMK58_06970</a> | <a href="#">K00788 thiamine-phosphate pyrophosphorylase</a> [EC:2.5.1.31]   (GenBank) <a href="#">thiamine-phosphate pyrophosph</a>   | Metabolism: Co-Factors and Vitamins | 38.418   | 35.936   | 43.539   | 366.218  | 87.457   | 326.554  |
| <a href="#">AMK58_06975</a> | <a href="#">no KO assigned</a>   (GenBank) <a href="#">GntR family transcriptional regulator</a>                                      | Transcription                       | 23.162   | 27.257   | 28.529   | 338.475  | 105.522  | 608.860  |
| <a href="#">AMK58_06980</a> | <a href="#">K00873 pyruvate kinase</a> [EC:2.7.1.40]   (GenBank) <a href="#">pyruvate kinase</a>                                      | Metabolism                          | 7.360    | 10.376   | 9.121    | 78.877   | 21.288   | 61.656   |
| <a href="#">AMK58_06985</a> | <a href="#">no KO assigned</a>   (GenBank) <a href="#">hypothetical protein</a>                                                       | Hypothetical                        | 448.443  | 408.268  | 376.850  | 74.308   | 287.368  | 210.226  |
| <a href="#">AMK58_06990</a> | <a href="#">K01006 pyruvate_orthophosphate dikinase</a> [EC:2.7.9.1]   (GenBank) <a href="#">pyruvate kinase</a>                      | Metabolism                          | 25.508   | 23.414   | 29.286   | 130.320  | 61.980   | 147.143  |
| <a href="#">AMK58_06995</a> | <a href="#">no KO assigned</a>   (GenBank) <a href="#">histidine kinase</a>                                                           | Signal Transduction                 | 99.550   | 155.923  | 133.282  | 435.379  | 121.274  | 336.809  |
| <a href="#">AMK58_07000</a> | <a href="#">K07090 uncharacterized protein</a>   (GenBank) <a href="#">hypothetical protein</a>                                       | Hypothetical                        | 69.093   | 90.661   | 69.532   | 484.828  | 82.745   | 193.553  |
| <a href="#">AMK58_07005</a> | <a href="#">no KO assigned</a>   (GenBank) <a href="#">acetyltransferase</a>                                                          | Acetyltransferase                   | 23.839   | 17.490   | 26.642   | 177.872  | 41.604   | 256.145  |
| <a href="#">AMK58_07010</a> | <a href="#">no KO assigned</a>   (GenBank) <a href="#">FmdB family transcriptional regulator</a>                                      | Transcription                       | 85.434   | 103.337  | 122.096  | 610.830  | 119.008  | 575.443  |
| <a href="#">AMK58_07015</a> | <a href="#">no KO assigned</a>   (GenBank) <a href="#">Fis family transcriptional regulator</a>                                       | Transcription                       | 49.937   | 60.045   | 60.546   | 47.120   | 31.331   | 80.089   |
| <a href="#">AMK58_07020</a> | <a href="#">K00285 D-amino-acid dehydrogenase</a> [EC:1.4.5.1]   (GenBank) <a href="#">amino acid dehydrogenase</a>                   | Metabolism: Amino Acid              | 2.396    | 3.303    | 3.855    | 43.447   | 10.046   | 23.838   |
| <a href="#">AMK58_07025</a> | <a href="#">no KO assigned</a>   (GenBank) <a href="#">hypothetical protein</a>                                                       | Hypothetical                        | 8.401    | 10.826   | 12.217   | 311.353  | 126.095  | 197.503  |
| <a href="#">AMK58_07030</a> | <a href="#">K05520 protease I</a> [EC:3.2.-.-]   (GenBank) <a href="#">glutamine amidotransferase</a>                                 | tRNA synthesis/modification         | 1892.612 | 1608.298 | 1391.673 | 560.999  | 323.014  | 522.358  |



|                             |                                                                                                                      |                              |           |           |           |          |          |          |
|-----------------------------|----------------------------------------------------------------------------------------------------------------------|------------------------------|-----------|-----------|-----------|----------|----------|----------|
| <a href="#">AMK58_07035</a> | <a href="#">K07684 two-component system_NarL_family_nitrate/nitrite response regulator NarL</a>   (GenBank) two-co   | Nitrogen                     | 112.674   | 72.008    | 94.283    | 185.670  | 316.524  | 183.221  |
| <a href="#">AMK58_07040</a> | <a href="#">no KO assigned   (GenBank) two-component system response regulator</a>                                   | Signal Transduction          | 16.040    | 22.669    | 13.611    | 142.779  | 1027.097 | 445.720  |
| <a href="#">AMK58_07045</a> | <a href="#">K13481 xanthine dehydrogenase small subunit [EC:1.17.1.4]   (GenBank) FAD-binding molybdopterin de</a>   | Metabolism: Nucleotide       | 6.272     | 7.396     | 7.533     | 58.153   | 162.533  | 61.530   |
| <a href="#">AMK58_07050</a> | <a href="#">K13482 xanthine dehydrogenase large subunit [EC:1.17.1.4]   (GenBank) hypothetical protein</a>           | Metabolism: Nucleotide       | 4.088     | 3.091     | 4.378     | 64.805   | 59.090   | 112.701  |
| <a href="#">AMK58_07055</a> | <a href="#">K03190 urease accessory protein   (GenBank) urease accessory protein</a>                                 | Nitrogen                     | 240.687   | 272.569   | 313.240   | 310.856  | 234.711  | 294.369  |
| <a href="#">AMK58_07060</a> | <a href="#">K01430 urease subunit gamma [EC:3.5.1.5]   (GenBank) ureA: urease subunit gamma</a>                      | Nitrogen                     | 913.855   | 1024.157  | 1104.078  | 1179.728 | 462.627  | 941.509  |
| <a href="#">AMK58_07065</a> | <a href="#">K01429 urease subunit beta [EC:3.5.1.5]   (GenBank) urease subunit beta</a>                              | Nitrogen                     | 98.126    | 148.926   | 174.559   | 444.156  | 73.828   | 172.807  |
| <a href="#">AMK58_07070</a> | <a href="#">K01428 urease subunit alpha [EC:3.5.1.5]   (GenBank) ureC: urease subunit alpha</a>                      | Nitrogen                     | 15.931    | 13.113    | 13.935    | 26.557   | 11.938   | 34.731   |
| <a href="#">AMK58_07075</a> | <a href="#">K01776 glutamate racemase [EC:5.1.1.3]   (GenBank) glutamate racemase</a>                                | Metabolism: Amino Acid       | 29.842    | 27.168    | 29.455    | 102.604  | 22.203   | 51.655   |
| <a href="#">AMK58_07080</a> | <a href="#">K03187 urease accessory protein   (GenBank) urease accessory protein UreF</a>                            | Nitrogen                     | 329.803   | 341.585   | 295.792   | 439.535  | 241.235  | 560.374  |
| <a href="#">AMK58_07085</a> | <a href="#">K03188 urease accessory protein   (GenBank) urease accessory protein UreF</a>                            | Nitrogen                     | 32.398    | 24.333    | 42.598    | 251.215  | 36.416   | 154.328  |
| <a href="#">AMK58_07090</a> | <a href="#">K03189 urease accessory protein   (GenBank) urease accessory protein UreG</a>                            | Nitrogen                     | 24.632    | 23.772    | 29.185    | 165.485  | 25.557   | 147.233  |
| <a href="#">AMK58_07095</a> | <a href="#">no KO assigned   (GenBank) hypothetical protein</a>                                                      | Hypothetical                 | 11.511    | 9.943     | 11.472    | 129.303  | 11.848   | 61.472   |
| <a href="#">AMK58_07100</a> | <a href="#">no KO assigned   (GenBank) hypothetical protein</a>                                                      | Hypothetical                 | 253.462   | 222.852   | 209.598   | 109.762  | 103.101  | 281.241  |
| <a href="#">AMK58_07105</a> | <a href="#">K00208 enoyl-acyl-carrier protein   reductase [EC:1.3.1.9.1.3.1.10]   (GenBank) short-chain dehydr</a>   | Metabolism: Lipid            | 28.189    | 28.529    | 32.661    | 191.280  | 309.067  | 125.411  |
| <a href="#">AMK58_07110</a> | <a href="#">K07216 hemerythrin   (GenBank) hypothetical protein</a>                                                  | No COG                       | 19.443    | 14.080    | 31.091    | 354.362  | 346.690  | 185.204  |
| <a href="#">AMK58_07115</a> | <a href="#">no KO assigned   (GenBank) N-formylglutamate deformylase</a>                                             | Cell Wall                    | 79.689    | 64.006    | 73.118    | 59.566   | 55.097   | 227.397  |
| <a href="#">AMK58_07120</a> | <a href="#">no KO assigned   (GenBank) ArsR family transcriptional regulator</a>                                     | Transcription                | 360.465   | 350.343   | 289.929   | 106.738  | 100.422  | 392.784  |
| <a href="#">AMK58_07125</a> | <a href="#">K09950 uncharacterized protein   (GenBank) hypothetical protein</a>                                      | Hypothetical                 | 148.837   | 112.112   | 128.073   | 253.781  | 130.603  | 545.616  |
| <a href="#">AMK58_07130</a> | <a href="#">no KO assigned   (GenBank) hypothetical protein</a>                                                      | Hypothetical                 | 71.860    | 73.959    | 67.368    | 34.379   | 51.586   | 86.419   |
| <a href="#">AMK58_07135</a> | <a href="#">no KO assigned   (GenBank) glycosyl transferase</a>                                                      | Glycosyl Transferase         | 259.297   | 296.713   | 270.301   | 50.841   | 72.513   | 113.530  |
| <a href="#">AMK58_07140</a> | <a href="#">no KO assigned   (GenBank) hypothetical protein</a>                                                      | Hypothetical                 | 81.978    | 89.666    | 89.577    | 361.370  | 91.863   | 297.632  |
| <a href="#">AMK58_07145</a> | <a href="#">no KO assigned   (GenBank) glycosyl transferase</a>                                                      | Glycosyl Transferase         | 22.879    | 28.866    | 30.131    | 265.170  | 59.102   | 129.268  |
| <a href="#">AMK58_07150</a> | <a href="#">no KO assigned   (GenBank) transcriptional regulator</a>                                                 | Transcription                | 17.333    | 18.548    | 29.518    | 684.438  | 86.367   | 314.019  |
| <a href="#">AMK58_07155</a> | <a href="#">K13683 putative colanic acid biosynthesis glycosyltransferase [EC:2.4.-.-]   (GenBank) hypothetical</a>  | Biosynthesis: Polysaccharide | 28.702    | 37.430    | 37.680    | 129.788  | 58.466   | 220.351  |
| <a href="#">AMK58_07160</a> | <a href="#">no KO assigned   (GenBank) sugar transporter</a>                                                         | Transport: Sugar             | 26.746    | 22.590    | 26.339    | 14.235   | 14.137   | 43.808   |
| <a href="#">AMK58_07165</a> | <a href="#">no KO assigned   (GenBank) pseudogene</a>                                                                | Pseudogene                   | 15.495    | 23.681    | 21.585    | 441.184  | 61.566   | 519.581  |
| <a href="#">AMK58_07170</a> | <a href="#">K12251 N-carbamoylputrescine amidase [EC:3.5.1.53]   (GenBank) N-carbamoylputrescine amidase</a>         | Metabolism: Amino Acid       | 29.560    | 32.257    | 38.501    | 695.935  | 110.301  | 482.747  |
| <a href="#">AMK58_07175</a> | <a href="#">no KO assigned   (GenBank) transcriptional regulator</a>                                                 | Transcription                | 60.883    | 84.047    | 67.098    | 151.065  | 57.030   | 180.487  |
| <a href="#">AMK58_07180</a> | <a href="#">no KO assigned   (GenBank) hypothetical protein</a>                                                      | Hypothetical                 | 44.791    | 46.899    | 40.656    | 97.980   | 197.756  | 179.666  |
| <a href="#">AMK58_07185</a> | <a href="#">K02039 phosphate transport system protein   (GenBank) PhoU family transcriptional regulator</a>          | Transport: Ion               | 43.423    | 51.886    | 49.221    | 68.889   | 50.724   | 101.058  |
| <a href="#">AMK58_07190</a> | <a href="#">K06197 cation transport regulator   (GenBank) hypothetical protein</a>                                   | Transport: Ion               | 266.365   | 225.044   | 274.751   | 814.534  | 454.249  | 1191.555 |
| <a href="#">AMK58_07195</a> | <a href="#">no KO assigned   (GenBank) hypothetical protein</a>                                                      | Hypothetical                 | 527.946   | 555.466   | 631.875   | 115.332  | 298.901  | 231.192  |
| <a href="#">AMK58_07200</a> | <a href="#">K04771 serine protease Do [EC:3.4.21.107]   (GenBank) serine protease</a>                                | Defense                      | 164.501   | 187.537   | 215.577   | 33.934   | 49.786   | 44.208   |
| <a href="#">AMK58_07205</a> | <a href="#">K00721 dolichol-phosphate mannosyltransferase [EC:2.4.1.83]   (GenBank) glycosyl transferase</a>         | Glycosyl Transferase         | 457.819   | 365.013   | 367.198   | 156.203  | 742.685  | 139.043  |
| <a href="#">AMK58_07210</a> | <a href="#">no KO assigned   (GenBank) lipid A biosynthesis</a>                                                      | Biosynthesis: Lipid          | 50.074    | 49.117    | 87.760    | 983.127  | 956.853  | 920.681  |
| <a href="#">AMK58_07215</a> | <a href="#">no KO assigned   (GenBank) glycosyl transferase</a>                                                      | Glycosyl Transferase         | 37.321    | 31.112    | 31.359    | 89.716   | 32.194   | 84.437   |
| <a href="#">AMK58_07220</a> | <a href="#">no KO assigned   (GenBank) hypothetical protein</a>                                                      | Hypothetical                 | 32.160    | 16.954    | 21.885    | 48.571   | 9.569    | 114.024  |
| <a href="#">AMK58_07225</a> | <a href="#">K00847 fructokinase [EC:2.7.1.41]   (GenBank) hypothetical protein</a>                                   | Metabolism: Carbohydrate     | 80.966    | 53.748    | 67.955    | 341.611  | 31.741   | 275.634  |
| <a href="#">AMK58_07230</a> | <a href="#">no KO assigned   (GenBank) hypothetical protein</a>                                                      | Hypothetical                 | 18.793    | 13.804    | 27.535    | 83.659   | 65.969   | 53.278   |
| <a href="#">AMK58_07235</a> | <a href="#">K01997 branched-chain amino acid transport system permease protein   (GenBank) branched-chain amino</a>  | Transport: Amino Acid        | 9.622     | 17.565    | 16.391    | 191.723  | 68.047   | 147.958  |
| <a href="#">AMK58_07240</a> | <a href="#">K01998 branched-chain amino acid transport system permease protein   (GenBank) ABC transporter perme</a> | Transport: Amino Acid        | 164.623   | 205.856   | 163.047   | 110.688  | 186.657  | 130.390  |
| <a href="#">AMK58_07245</a> | <a href="#">K01995 branched-chain amino acid transport system ATP-binding protein   (GenBank) ABC transporter A</a>  | Transport: Amino Acid        | 987.888   | 852.497   | 907.944   | 58.094   | 93.343   | 190.161  |
| <a href="#">AMK58_07250</a> | <a href="#">K01996 branched-chain amino acid transport system ATP-binding protein   (GenBank) ABC transporter A</a>  | Transport: Amino Acid        | 1321.435  | 1013.308  | 1315.853  | 229.934  | 138.582  | 341.230  |
| <a href="#">AMK58_07255</a> | <a href="#">no KO assigned   (GenBank) hypothetical protein</a>                                                      | Hypothetical                 | 1287.429  | 1032.791  | 1150.870  | 246.432  | 163.312  | 391.696  |
| <a href="#">AMK58_07260</a> | <a href="#">K01999 branched-chain amino acid transport system substrate-binding protein   (GenBank) ABC transpor</a> | Transport: Amino Acid        | 322.866   | 300.248   | 324.027   | 96.045   | 51.174   | 117.368  |
| <a href="#">AMK58_07265</a> | <a href="#">no KO assigned   (GenBank) hypothetical protein</a>                                                      | Hypothetical                 | 870.105   | 734.837   | 906.790   | 186.642  | 205.760  | 298.495  |
| <a href="#">AMK58_07270</a> | <a href="#">no KO assigned   (GenBank) hypothetical protein</a>                                                      | Hypothetical                 | 18430.273 | 21854.715 | 18453.672 | 608.197  | 1389.915 | 1084.234 |
| <a href="#">AMK58_07275</a> | <a href="#">no KO assigned   (GenBank) hypothetical protein</a>                                                      | Hypothetical                 | 13.492    | 14.592    | 16.256    | 37.392   | 203.944  | 70.964   |
| <a href="#">AMK58_07280</a> | <a href="#">no KO assigned   (GenBank) two-component system response regulator</a>                                   | Signal Transduction          | 55.000    | 82.990    | 50.331    | 50.542   | 20.467   | 111.399  |
| <a href="#">AMK58_07285</a> | <a href="#">no KO assigned   (GenBank) histidine kinase</a>                                                          | Signal Transduction          | 286.229   | 291.516   | 359.275   | 145.236  | 317.551  | 134.586  |
| <a href="#">AMK58_07290</a> | <a href="#">K02572 ferredoxin-type protein NapF   (GenBank) hypothetical protein</a>                                 | Ferredoxin                   | 390.971   | 346.608   | 363.744   | 140.786  | 229.657  | 500.536  |
| <a href="#">AMK58_07295</a> | <a href="#">no KO assigned   (GenBank) hypothetical protein</a>                                                      | Hypothetical                 | 182.024   | 167.307   | 184.556   | 359.310  | 200.282  | 688.893  |
| <a href="#">AMK58_07300</a> | <a href="#">K06177 rRNA pseudouridine32 synthase / 23S rRNA pseudouridine746 synthase [EC:5.4.99.28.5.4.99.29</a>    | rRNA synthesis/modification  | 13.862    | 14.677    | 16.017    | 71.691   | 35.108   | 146.439  |
| <a href="#">AMK58_07305</a> | <a href="#">no KO assigned   (GenBank) oxidoreductase</a>                                                            | Oxidoreductase               | 13.453    | 17.295    | 15.058    | 95.350   | 458.046  | 171.010  |
| <a href="#">AMK58_07310</a> | <a href="#">K00764 amidophosphoribosyltransferase [EC:2.4.2.14]   (GenBank) amidophosphoribosyltransferase</a>       | Metabolism                   | 16.962    | 13.978    | 17.002    | 82.940   | 108.856  | 86.236   |
| <a href="#">AMK58_07315</a> | <a href="#">K03558 membrane protein required for colicin V production   (GenBank) colicin V production protein</a>   | Membrane                     | 58.687    | 52.646    | 55.968    | 176.115  | 174.920  | 171.918  |
| <a href="#">AMK58_07320</a> | <a href="#">K04485 DNA repair protein RadA/Sms   (GenBank) DNA repair protein RadA</a>                               | DNA Repair and Replication   | 235.841   | 195.167   | 217.419   | 160.334  | 439.462  | 217.808  |
| <a href="#">AMK58_07325</a> | <a href="#">K01265 methionyl aminopeptidase [EC:3.4.11.18]   (GenBank) methionine aminopeptidase</a>                 | Peptidase                    | 45.476    | 41.934    | 55.196    | 152.784  | 303.909  | 211.251  |
| <a href="#">AMK58_07330</a> | <a href="#">K01515 ADP-ribose pyrophosphatase [EC:3.6.1.13]   (GenBank) NUDIX hydrolase</a>                          | Metabolism: Nucleotide       | 60.025    | 59.974    | 56.683    | 595.230  | 163.036  | 356.945  |
| <a href="#">AMK58_07335</a> | <a href="#">no KO assigned   (GenBank) hypothetical protein</a>                                                      | Hypothetical                 | 782.840   | 776.203   | 671.790   | 408.057  | 557.423  | 844.329  |
| <a href="#">AMK58_07340</a> | <a href="#">K02065 phospholipid/cholesterol/gamma-HCH transport system ATP-binding protein   (GenBank) ABC tr</a>    | Transport: phospholipid      | 105.023   | 115.993   | 95.932    | 82.936   | 93.994   | 186.974  |
| <a href="#">AMK58_07345</a> | <a href="#">K02066 phospholipid/cholesterol/gamma-HCH transport system permease protein   (GenBank) ABC trans</a>    | Transport: phospholipid      | 91.624    | 87.510    | 80.450    | 24.839   | 51.320   | 68.489   |
| <a href="#">AMK58_07350</a> | <a href="#">K01775 alanine racemase [EC:5.1.1.1]   (GenBank) alanine racemase</a>                                    | Metabolism: Amino Acid       | 66.234    | 56.621    | 72.696    | 61.337   | 67.149   | 149.199  |
| <a href="#">AMK58_07355</a> | <a href="#">K02314 replicative DNA helicase [EC:3.6.4.12]   (GenBank) replicative DNA helicase</a>                   | DNA Repair and Replication   | 39.332    | 34.446    | 40.551    | 82.310   | 55.574   | 75.506   |
| <a href="#">AMK58_07360</a> | <a href="#">K00574 cyclopropane-fatty-acyl-phospholipid synthase [EC:2.1.1.79]   (GenBank) cyclopropane-fatty-ac</a> | Biosynthesis: Lipid          | 70.386    | 62.875    | 75.920    | 116.660  | 78.248   | 122.745  |
| <a href="#">AMK58_07365</a> | <a href="#">K02939 large subunit ribosomal protein L9   (GenBank) 50S ribosomal protein L9</a>                       | Ribosome                     | 304.929   | 320.216   | 314.090   | 322.369  | 166.336  | 568.675  |

|                             |                                                                                                                        |                                       |          |          |          |         |          |          |
|-----------------------------|------------------------------------------------------------------------------------------------------------------------|---------------------------------------|----------|----------|----------|---------|----------|----------|
| <a href="#">AMK58_07370</a> | <a href="#">no KO assigned   (GenBank) hypothetical protein.</a>                                                       | Hypothetical                          | 10.121   | 11.338   | 17.563   | 212.689 | 71.388   | 327.893  |
| <a href="#">AMK58_07375</a> | <a href="#">K02963 small subunit ribosomal protein S18   (GenBank) 30S ribosomal protein S18.</a>                      | Ribosome                              | 1910.143 | 1438.762 | 1632.328 | 370.711 | 1879.881 | 535.851  |
| <a href="#">AMK58_07380</a> | <a href="#">K02990 small subunit ribosomal protein S6   (GenBank) 30S ribosomal protein S6.</a>                        | Ribosome                              | 1837.959 | 1458.272 | 1748.336 | 375.101 | 2083.344 | 505.982  |
| <a href="#">AMK58_07385</a> | <a href="#">K00645 [acyl-carrier-protein] S-malonyltransferase [EC:2.3.1.39]   (GenBank) ACP S-malonyltransferas.</a>  | Metabolism: Lipid                     | 368.411  | 264.550  | 332.125  | 39.657  | 353.245  | 37.892   |
| <a href="#">AMK58_07390</a> | <a href="#">K00059 3-oxoacyl-[acyl-carrier-protein] reductase [EC:1.1.1.100]   (GenBank) 3-oxoacyl-ACP synthase</a>    | Metabolism: Lipid                     | 770.416  | 601.816  | 584.174  | 39.558  | 623.115  | 82.301   |
| <a href="#">AMK58_07395</a> | <a href="#">K02078 acyl carrier protein   (GenBank) acyl carrier protein.</a>                                          | Metabolism: Lipid                     | 586.708  | 593.754  | 619.244  | 551.432 | 326.624  | 494.922  |
| <a href="#">AMK58_07400</a> | <a href="#">K09458 3-oxoacyl-[acyl-carrier-protein] synthase II [EC:2.3.1.179]   (GenBank) 3-oxoacyl-ACP synthas.</a>  | Metabolism: Lipid                     | 134.496  | 112.827  | 120.679  | 59.584  | 103.659  | 72.802   |
| <a href="#">AMK58_07405</a> | <a href="#">K07082 UPF0755 protein   (GenBank) aminodeoxychorismate lyase.</a>                                         | Lyase                                 | 688.265  | 750.066  | 618.219  | 35.286  | 303.290  | 93.670   |
| <a href="#">AMK58_07410</a> | <a href="#">no KO assigned   (GenBank) hypothetical protein.</a>                                                       | Hypothetical                          | 4438.878 | 4019.700 | 3932.725 | 646.609 | 3617.811 | 995.655  |
| <a href="#">AMK58_07415</a> | <a href="#">K08309 soluble lytic murein transglycosylase [EC:3.2.1.-]   (GenBank) lytic murein transglycosylase.</a>   | Cell Wall                             | 57.487   | 71.047   | 69.013   | 36.977  | 99.455   | 92.787   |
| <a href="#">AMK58_07420</a> | <a href="#">K01714 4-hydroxy-tetrahydrodipicolinate synthase [EC:4.3.3.7]   (GenBank) 4-hydroxy-tetrahydrodipico.</a>  | Biosynthesis: Co-Factors and Vitamins | 79.473   | 108.173  | 111.308  | 23.513  | 25.945   | 51.905   |
| <a href="#">AMK58_07425</a> | <a href="#">K03664 SsrA-binding protein   (GenBank) SsrA-binding protein.</a>                                          | Translation                           | 332.346  | 304.230  | 325.011  | 822.177 | 314.811  | 687.432  |
| <a href="#">AMK58_07430</a> | <a href="#">K00564 16S rRNA (guanine1207-N2)-methyltransferase [EC:2.1.1.172]   (GenBank) rRNA (guanine-N2)</a>        | Ribosome                              | 660.675  | 610.880  | 654.131  | 123.255 | 254.067  | 201.082  |
| <a href="#">AMK58_07435</a> | <a href="#">no KO assigned   (GenBank) transcriptional regulator.</a>                                                  | Transcription                         | 250.668  | 244.456  | 223.599  | 39.471  | 138.919  | 67.206   |
| <a href="#">AMK58_07440</a> | <a href="#">K06910 uncharacterized protein   (GenBank) phosphatidylethanolamine-binding protein.</a>                   | No COG                                | 130.506  | 90.419   | 124.504  | 211.547 | 150.393  | 163.930  |
| <a href="#">AMK58_07445</a> | <a href="#">K01698 porphobilinogen synthase [EC:4.2.1.24]   (GenBank) delta-aminolevulinic acid dehydratase.</a>       | Metabolism: Co-Factors and Vitamins   | 36.179   | 37.095   | 40.530   | 134.195 | 98.513   | 134.635  |
| <a href="#">AMK58_07450</a> | <a href="#">no KO assigned   (GenBank) 3',5'-cyclic-nucleotide phosphodiesterase.</a>                                  | phosphodiesterase                     | 20.393   | 19.596   | 23.051   | 96.853  | 84.637   | 172.041  |
| <a href="#">AMK58_07455</a> | <a href="#">no KO assigned   (GenBank) diacylglycerol kinase.</a>                                                      | No COG                                | 250.521  | 253.062  | 249.246  | 206.205 | 300.276  | 233.461  |
| <a href="#">AMK58_07460</a> | <a href="#">K01692 enoyl-CoA hydratase [EC:4.2.1.17]   (GenBank) enoyl-CoA hydratase.</a>                              | Metabolism                            | 14.968   | 11.923   | 18.027   | 147.037 | 145.814  | 214.464  |
| <a href="#">AMK58_07465</a> | <a href="#">no KO assigned   (GenBank) MarR family transcriptional regulator.</a>                                      | Transcription                         | 43.168   | 51.886   | 58.531   | 380.145 | 156.191  | 402.181  |
| <a href="#">AMK58_07470</a> | <a href="#">K01995 branched-chain amino acid transport system ATP-binding protein   (GenBank) ABC transporter A.</a>   | Transport: Amino Acid                 | 334.717  | 294.700  | 308.507  | 171.625 | 97.929   | 284.238  |
| <a href="#">AMK58_07475</a> | <a href="#">K01996 branched-chain amino acid transport system ATP-binding protein   (GenBank) ABC transporter A.</a>   | Transport: Amino Acid                 | 2025.114 | 1920.944 | 2053.512 | 47.557  | 921.217  | 170.811  |
| <a href="#">AMK58_07480</a> | <a href="#">K01999 branched-chain amino acid transport system substrate-binding protein   (GenBank) ABC transport.</a> | Transport: Amino Acid                 | 693.365  | 828.733  | 635.665  | 99.581  | 181.794  | 204.211  |
| <a href="#">AMK58_07485</a> | <a href="#">K01997 branched-chain amino acid transport system permease protein   (GenBank) ABC transporter perme.</a>  | Transport: Amino Acid                 | 1010.729 | 1164.863 | 926.137  | 48.035  | 187.435  | 155.888  |
| <a href="#">AMK58_07490</a> | <a href="#">K01998 branched-chain amino acid transport system permease protein   (GenBank) ABC transporter perme.</a>  | Transport: Amino Acid                 | 2447.130 | 2642.093 | 2628.987 | 164.299 | 180.275  | 283.783  |
| <a href="#">AMK58_07495</a> | <a href="#">no KO assigned   (GenBank) hypothetical protein.</a>                                                       | Hypothetical                          | 980.027  | 914.330  | 896.841  | 128.457 | 129.670  | 265.274  |
| <a href="#">AMK58_07500</a> | <a href="#">K00259 alanine dehydrogenase [EC:1.4.1.11]   (GenBank) alanine dehydrogenase.</a>                          | Metabolism: Amino Acid                | 320.269  | 349.072  | 313.877  | 84.354  | 70.418   | 158.422  |
| <a href="#">AMK58_07505</a> | <a href="#">no KO assigned   (GenBank) hypothetical protein.</a>                                                       | Hypothetical                          | 458.034  | 565.161  | 463.724  | 131.293 | 160.336  | 322.949  |
| <a href="#">AMK58_07510</a> | <a href="#">no KO assigned   (GenBank) multifunctional 2',3'-cyclic-nucleotide 2'-phosphodiesterase/5'-nucleotid.</a>  | Metabolism: Nucleotide                | 63.454   | 65.931   | 74.048   | 155.956 | 191.292  | 113.951  |
| <a href="#">AMK58_07515</a> | <a href="#">no KO assigned   (GenBank) glutamine amidotransferase.</a>                                                 | tRNA synthesis/modification           | 82.243   | 97.258   | 123.180  | 213.522 | 889.943  | 646.101  |
| <a href="#">AMK58_07520</a> | <a href="#">K07141 molybdenum cofactor cytidyltransferase [EC:2.7.7.6]   (GenBank) 4-diphosphocytidyl-2C-methyl.</a>   | Biosynthesis: Co-Factors and Vitamins | 80.491   | 80.822   | 83.463   | 186.348 | 80.592   | 238.408  |
| <a href="#">AMK58_07525</a> | <a href="#">K07402 xanthine dehydrogenase accessory factor   (GenBank) xanthine dehydrogenase.</a>                     | dehydrogenase                         | 45.593   | 69.612   | 63.420   | 220.998 | 99.840   | 166.291  |
| <a href="#">AMK58_07530</a> | <a href="#">no KO assigned   (GenBank) xanthine dehydrogenase.</a>                                                     | dehydrogenase                         | 101.857  | 126.300  | 124.986  | 768.195 | 416.920  | 371.025  |
| <a href="#">AMK58_07535</a> | <a href="#">K07161 uncharacterized protein   (GenBank) hypothetical protein.</a>                                       | Hypothetical                          | 66.389   | 59.074   | 77.226   | 121.234 | 191.211  | 129.952  |
| <a href="#">AMK58_07540</a> | <a href="#">no KO assigned   (GenBank) ATPase.</a>                                                                     | No COG                                | 18.083   | 23.486   | 25.291   | 64.242  | 86.163   | 30.862   |
| <a href="#">AMK58_07545</a> | <a href="#">K03519 carbon-monoxide dehydrogenase medium subunit [EC:1.2.7.4]   (GenBank) carbon monoxide dehyd.</a>    | Metabolism: Carbon                    | 22.844   | 32.756   | 32.002   | 280.306 | 52.383   | 108.033  |
| <a href="#">AMK58_07550</a> | <a href="#">K03520 carbon-monoxide dehydrogenase large subunit [EC:1.2.7.4]   (GenBank) carbon monoxide dehydr.</a>    | Metabolism: Carbon                    | 73.070   | 75.028   | 80.405   | 98.831  | 44.681   | 77.053   |
| <a href="#">AMK58_07555</a> | <a href="#">K03518 carbon-monoxide dehydrogenase small subunit [EC:1.2.7.4]   (GenBank) carbon monoxide dehydr.</a>    | Metabolism: Carbon                    | 574.011  | 689.948  | 790.576  | 323.395 | 335.587  | 305.698  |
| <a href="#">AMK58_07560</a> | <a href="#">K07080 uncharacterized protein   (GenBank) C4-dicarboxylate ABC transporter.</a>                           | Membrane Transport                    | 1380.046 | 1296.494 | 1614.853 | 395.706 | 711.047  | 448.600  |
| <a href="#">AMK58_07565</a> | <a href="#">no KO assigned   (GenBank) C4-dicarboxylate ABC transporter.</a>                                           | Membrane Transport                    | 160.682  | 142.808  | 193.896  | 48.416  | 124.217  | 45.400   |
| <a href="#">AMK58_07570</a> | <a href="#">no KO assigned   (GenBank) hypothetical protein.</a>                                                       | Hypothetical                          | 4599.253 | 5006.532 | 4612.613 | 194.112 | 608.312  | 513.612  |
| <a href="#">AMK58_07575</a> | <a href="#">no KO assigned   (GenBank) sodium/proton antiporter.</a>                                                   | Transport: Ion                        | 996.414  | 936.947  | 981.391  | 178.073 | 106.841  | 265.127  |
| <a href="#">AMK58_07580</a> | <a href="#">no KO assigned   (GenBank) universal stress protein UspA.</a>                                              | Stress Response                       | 73.085   | 78.912   | 89.863   | 123.065 | 21.940   | 95.531   |
| <a href="#">AMK58_07585</a> | <a href="#">no KO assigned   (GenBank) hypothetical protein.</a>                                                       | Hypothetical                          | 501.049  | 503.204  | 440.910  | 381.212 | 188.271  | 441.091  |
| <a href="#">AMK58_07590</a> | <a href="#">K04768 acetoin utilization protein AcuC   (GenBank) acetoin utilization protein.</a>                       | Metabolism                            | 80.404   | 88.244   | 83.669   | 61.447  | 198.645  | 165.511  |
| <a href="#">AMK58_07595</a> | <a href="#">no KO assigned   (GenBank) hypothetical protein.</a>                                                       | Hypothetical                          | 29.943   | 37.594   | 36.310   | 271.182 | 271.699  | 368.196  |
| <a href="#">AMK58_07600</a> | <a href="#">no KO assigned   (GenBank) hypothetical protein.</a>                                                       | Hypothetical                          | 21.161   | 23.460   | 30.698   | 357.101 | 262.868  | 274.302  |
| <a href="#">AMK58_07605</a> | <a href="#">K09005 uncharacterized protein   (GenBank) hypothetical protein.</a>                                       | Hypothetical                          | 163.940  | 161.744  | 157.782  | 68.165  | 229.358  | 305.894  |
| <a href="#">AMK58_07610</a> | <a href="#">no KO assigned   (GenBank) hypothetical protein.</a>                                                       | Hypothetical                          | 139.702  | 166.928  | 135.125  | 280.475 | 157.031  | 392.144  |
| <a href="#">AMK58_07615</a> | <a href="#">K14232 tRNA Pro   (GenBank) tRNA-Pro.</a>                                                                  | tRNA synthesis/modification           | 423.762  | 556.427  | 439.813  | 638.347 | 347.212  | 1154.363 |
| <a href="#">AMK58_07620</a> | <a href="#">no KO assigned   (GenBank) oxidoreductase.</a>                                                             | Oxidoreductase                        | 11.822   | 24.355   | 23.644   | 202.050 | 57.373   | 253.646  |
| <a href="#">AMK58_07625</a> | <a href="#">K14219 tRNA Arg   (GenBank) tRNA-Arg.</a>                                                                  | tRNA synthesis/modification           | 136.799  | 197.279  | 104.654  | 393.880 | 98.977   | 309.106  |
| <a href="#">AMK58_07630</a> | <a href="#">no KO assigned   (GenBank) hypothetical protein.</a>                                                       | Hypothetical                          | 455.753  | 649.844  | 506.336  | 75.819  | 220.183  | 224.083  |
| <a href="#">AMK58_07635</a> | <a href="#">K01496 phosphoribosyl-AMP cyclohydrolase [EC:3.5.4.19]   (GenBank) phosphoribosyl-AMP cyclohydr.</a>       | Biosynthesis: Amino Acid              | 67.913   | 76.493   | 60.338   | 6.338   | 25.967   | 43.617   |
| <a href="#">AMK58_07640</a> | <a href="#">K01760 cystathionine beta-lyase [EC:4.4.1.8]   (GenBank) cystathionine beta-lyase.</a>                     | Biosynthesis: Amino Acid              | 11.296   | 15.338   | 15.232   | 29.576  | 226.476  | 92.368   |
| <a href="#">AMK58_07645</a> | <a href="#">K09969 general L-amino acid transport system substrate-binding protein   (GenBank) amino acid ABC tr.</a>  | Transport: Amino Acid                 | 39.530   | 28.284   | 39.048   | 31.391  | 59.732   | 111.721  |
| <a href="#">AMK58_07650</a> | <a href="#">K09970 general L-amino acid transport system permease protein   (GenBank) amino acid ABC transporter.</a>  | Transport: Amino Acid                 | 119.158  | 96.447   | 96.508   | 94.744  | 95.832   | 212.190  |
| <a href="#">AMK58_07655</a> | <a href="#">K09971 general L-amino acid transport system permease protein   (GenBank) amino acid ABC transporter.</a>  | Transport: Amino Acid                 | 4079.647 | 3537.267 | 3445.647 | 183.927 | 156.525  | 162.836  |
| <a href="#">AMK58_07660</a> | <a href="#">K09972 general L-amino acid transport system ATP-binding protein [EC:3.6.3.-]   (GenBank) ABC transp.</a>  | Transport: Amino Acid                 | 1181.453 | 1056.639 | 1196.822 | 272.397 | 66.383   | 325.683  |
| <a href="#">AMK58_07665</a> | <a href="#">K00817 histidinol-phosphate aminotransferase [EC:2.6.1.9]   (GenBank) histidinol phosphate aminotran.</a>  | Metabolism: Amino Acid                | 747.074  | 632.770  | 706.614  | 73.775  | 45.239   | 148.659  |
| <a href="#">AMK58_07670</a> | <a href="#">no KO assigned   (GenBank) multidrug DMT transporter permease.</a>                                         | Transport                             | 440.641  | 426.128  | 418.241  | 83.813  | 109.274  | 200.414  |
| <a href="#">AMK58_07675</a> | <a href="#">no KO assigned   (GenBank) GNAT family acetyltransferase.</a>                                              | Acetyltransferase                     | 279.113  | 252.386  | 247.093  | 220.290 | 156.868  | 335.935  |
| <a href="#">AMK58_07680</a> | <a href="#">no KO assigned   (GenBank) acetyltransferase.</a>                                                          | Acetyltransferase                     | 84.335   | 71.504   | 69.601   | 394.466 | 174.888  | 405.719  |
| <a href="#">AMK58_07685</a> | <a href="#">K01011 thiosulfate/3-mercaptopyruvate sulfurtransferase [EC:2.8.1.2]   (GenBank) sseA; 3-mer.</a>          | Metabolism                            | 36.068   | 32.042   | 30.086   | 86.391  | 84.399   | 105.556  |
| <a href="#">AMK58_07690</a> | <a href="#">K07050 misacylated tRNA(Ala) deacylase [EC:3.1.1.-]   (GenBank) Ala-tRNA(Pro) hydrolase.</a>               | tRNA synthesis/modification           | 44.120   | 34.737   | 33.170   | 78.115  | 74.005   | 77.225   |
| <a href="#">AMK58_07695</a> | <a href="#">K01738 cysteine synthase A [EC:2.5.1.47]   (GenBank) cysteine synthase.</a>                                | Metabolism                            | 82.765   | 60.460   | 65.635   | 239.971 | 120.114  | 120.760  |
| <a href="#">AMK58_07700</a> | <a href="#">K01515 ADP-ribose pyrophosphatase [EC:3.6.1.13]   (GenBank) nudF; ADP-ribose pyrophosphatase.</a>          | Metabolism: Nucleotide                | 101.194  | 78.393   | 71.642   | 308.659 | 178.106  | 146.928  |

|                             |                                                                                                                      |                                       |          |          |          |          |          |          |
|-----------------------------|----------------------------------------------------------------------------------------------------------------------|---------------------------------------|----------|----------|----------|----------|----------|----------|
| <a href="#">AMK58_07705</a> | <a href="#">no KO assigned   (GenBank) serine protease</a>                                                           | Protease                              | 145.337  | 72.831   | 69.544   | 193.101  | 338.969  | 174.386  |
| <a href="#">AMK58_07710</a> | <a href="#">no KO assigned   (GenBank) hypothetical protein</a>                                                      | Hypothetical                          | 99.382   | 138.643  | 114.639  | 550.080  | 416.785  | 605.321  |
| <a href="#">AMK58_07715</a> | <a href="#">no KO assigned   (GenBank) hypothetical protein</a>                                                      | Hypothetical                          | 374.231  | 582.442  | 507.819  | 998.391  | 1593.056 | 1343.834 |
| <a href="#">AMK58_07720</a> | <a href="#">K14220 tRNA Asn   (GenBank) tRNA-Asn</a>                                                                 | tRNA synthesis/modification           | 1484.759 | 1361.051 | 1720.725 | 230.475  | 1022.490 | 821.341  |
| <a href="#">AMK58_07725</a> | <a href="#">K14222 tRNA Cys   (GenBank) tRNA-Cys</a>                                                                 | tRNA synthesis/modification           | 1979.736 | 2658.820 | 2230.818 | 140.269  | 956.331  | 884.503  |
| <a href="#">AMK58_07730</a> | <a href="#">K00573 protein-L-isoaspartate(D-aspartate) O-methyltransferase [EC:2.1.1.77]   (GenBank) protein-L-i</a> | Methyltransferase                     | 1.659    | 3.303    | 1.402    | 22.711   | 3.107    | 69.378   |
| <a href="#">AMK58_07735</a> | <a href="#">no KO assigned   (GenBank) sulfurtransferase</a>                                                         | transferase                           | 11.755   | 16.387   | 9.314    | 19.420   | 32.592   | 240.526  |
| <a href="#">AMK58_07740</a> | <a href="#">K12340 outer membrane protein   (GenBank) hypothetical protein</a>                                       | Membrane                              | 410.541  | 395.975  | 374.964  | 43.459   | 106.372  | 103.317  |
| <a href="#">AMK58_07745</a> | <a href="#">K09991 uncharacterized protein   (GenBank) hypothetical protein</a>                                      | Hypothetical                          | 376.498  | 368.643  | 332.736  | 45.652   | 142.946  | 95.637   |
| <a href="#">AMK58_07750</a> | <a href="#">K01873 valyl-tRNA synthetase [EC:6.1.1.91]   (GenBank) valine--tRNA ligase</a>                           | tRNA synthesis/modification           | 213.361  | 206.012  | 190.436  | 99.032   | 88.527   | 91.615   |
| <a href="#">AMK58_07755</a> | <a href="#">K03406 methyl-accepting chemotaxis protein   (GenBank) hypothetical protein</a>                          | Chemotaxis                            | 55.624   | 59.818   | 49.421   | 76.912   | 15.561   | 48.828   |
| <a href="#">AMK58_07760</a> | <a href="#">no KO assigned   (GenBank) hypothetical protein</a>                                                      | Hypothetical                          | 750.838  | 764.988  | 685.744  | 361.904  | 355.082  | 632.426  |
| <a href="#">AMK58_07765</a> | <a href="#">K03642 rare lipoprotein A   (GenBank) hypothetical protein</a>                                           | Cell Wall                             | 3.972    | 3.827    | 9.015    | 462.702  | 50.981   | 472.721  |
| <a href="#">AMK58_07770</a> | <a href="#">K07258 D-alanyl-D-alanine carboxypeptidase (penicillin-binding protein 5/6) [EC:3.4.16.4]   (GenBank</a> | Cell Wall                             | 27.701   | 29.752   | 35.118   | 173.860  | 52.012   | 154.118  |
| <a href="#">AMK58_07775</a> | <a href="#">K00943 dTMP kinase [EC:2.7.4.91]   (GenBank) thymidylate kinase</a>                                      | Signal Transduction                   | 92.384   | 145.128  | 117.301  | 245.969  | 114.593  | 194.743  |
| <a href="#">AMK58_07780</a> | <a href="#">K02341 DNA polymerase III subunit delta' [EC:2.7.7.71]   (GenBank) DNA polymerase III subunit delta'</a> | DNA Repair and Replication            | 193.785  | 215.261  | 223.037  | 120.009  | 113.715  | 203.972  |
| <a href="#">AMK58_07785</a> | <a href="#">K01874 methionyl-tRNA synthetase [EC:6.1.1.101]   (GenBank) methionine--tRNA ligase</a>                  | tRNA synthesis/modification           | 49.257   | 44.772   | 60.640   | 120.358  | 49.525   | 48.715   |
| <a href="#">AMK58_07790</a> | <a href="#">K03424 TatD DNase family protein [EC:3.1.21.-1]   (GenBank) LuxR family transcriptional regulator</a>    | Transcription                         | 46.427   | 46.229   | 53.232   | 362.581  | 83.566   | 165.872  |
| <a href="#">AMK58_07795</a> | <a href="#">K06167 phosphoribosyl 1,2-cyclic phosphate phosphodiesterase [EC:3.1.4.55]   (GenBank) hydrolase</a>     | Metabolism: amino acids               | 295.713  | 288.101  | 288.362  | 249.639  | 428.127  | 260.174  |
| <a href="#">AMK58_07800</a> | <a href="#">no KO assigned   (GenBank) hypothetical protein</a>                                                      | Hypothetical                          | 59.350   | 63.825   | 59.252   | 76.005   | 115.012  | 128.340  |
| <a href="#">AMK58_07805</a> | <a href="#">no KO assigned   (GenBank) hypothetical protein</a>                                                      | Hypothetical                          | 61.525   | 63.230   | 59.572   | 79.203   | 114.839  | 213.417  |
| <a href="#">AMK58_07810</a> | <a href="#">K20074 PPM family protein phosphatase [EC:3.1.3.16]   (GenBank) protein phosphatase</a>                  | phosphatases                          | 115.135  | 120.104  | 104.259  | 76.503   | 209.019  | 276.649  |
| <a href="#">AMK58_07815</a> | <a href="#">no KO assigned   (GenBank) hypothetical protein</a>                                                      | Hypothetical                          | 201.280  | 189.232  | 204.494  | 289.471  | 1057.163 | 829.469  |
| <a href="#">AMK58_07820</a> | <a href="#">K10536 agmatine deiminase [EC:3.5.3.12]   (GenBank) agmatine deiminase</a>                               | Metabolism: Amino Acid                | 72.621   | 107.401  | 88.292   | 133.640  | 682.473  | 272.891  |
| <a href="#">AMK58_07825</a> | <a href="#">K11074 putrescine transport system permease protein   (GenBank) spermidine/putrescine ABC transporte</a> | Membrane Transport                    | 204.259  | 221.170  | 218.919  | 72.731   | 908.430  | 148.347  |
| <a href="#">AMK58_07830</a> | <a href="#">K11075 putrescine transport system permease protein   (GenBank) spermidine/putrescine ABC transporte</a> | Membrane Transport                    | 486.134  | 531.557  | 608.735  | 92.678   | 2737.034 | 208.622  |
| <a href="#">AMK58_07835</a> | <a href="#">K11076 putrescine transport system ATP-binding protein   (GenBank) ABC transporter ATP-binding prot</a>  | Membrane Transport                    | 52.235   | 42.070   | 49.065   | 87.147   | 45.483   | 113.634  |
| <a href="#">AMK58_07840</a> | <a href="#">K11073 putrescine transport system substrate-binding protein   (GenBank) spermidine/putrescine ABC t</a> | Transport: Mineral and Ion            | 70.050   | 48.618   | 58.866   | 49.201   | 60.815   | 209.040  |
| <a href="#">AMK58_07845</a> | <a href="#">K01915 glutamine synthetase [EC:6.3.1.2]   (GenBank) glutamine synthetase</a>                            | Metabolism                            | 74.951   | 76.426   | 62.784   | 161.100  | 62.579   | 163.810  |
| <a href="#">AMK58_07850</a> | <a href="#">K09471 gamma-glutamylputrescine oxidase [EC:1.4.3.-1]   (GenBank) FAD-dependent oxidoreductase</a>       | Metabolism: Amino Acid                | 1299.782 | 1175.100 | 1013.154 | 72.167   | 758.765  | 173.795  |
| <a href="#">AMK58_07855</a> | <a href="#">no KO assigned   (GenBank) hypothetical protein</a>                                                      | Hypothetical                          | 315.786  | 337.002  | 286.114  | 150.330  | 140.205  | 259.774  |
| <a href="#">AMK58_07860</a> | <a href="#">no KO assigned   (GenBank) ferric reductase</a>                                                          | Oxidoreductase                        | 14.175   | 14.564   | 17.169   | 141.142  | 91.541   | 177.488  |
| <a href="#">AMK58_07865</a> | <a href="#">no KO assigned   (GenBank) FAD-dependent oxidoreductase</a>                                              | Oxidoreductase                        | 59.051   | 59.899   | 50.975   | 89.800   | 125.683  | 211.697  |
| <a href="#">AMK58_07870</a> | <a href="#">no KO assigned   (GenBank) hypothetical protein</a>                                                      | Hypothetical                          | 81.252   | 93.377   | 84.278   | 245.071  | 398.292  | 280.525  |
| <a href="#">AMK58_07875</a> | <a href="#">no KO assigned   (GenBank) hypothetical protein</a>                                                      | Hypothetical                          | 13.194   | 13.911   | 35.667   | 494.875  | 1092.526 | 518.648  |
| <a href="#">AMK58_07880</a> | <a href="#">K05794 tellurite resistance protein TerC   (GenBank) hypothetical protein</a>                            | Defense                               | 7.194    | 8.741    | 12.868   | 145.363  | 591.519  | 224.426  |
| <a href="#">AMK58_07885</a> | <a href="#">K03530 DNA-binding protein HU-beta   (GenBank) DNA-binding protein HU</a>                                | DNA Repair and Replication            | 78.084   | 89.109   | 74.660   | 225.650  | 258.380  | 353.894  |
| <a href="#">AMK58_07890</a> | <a href="#">no KO assigned   (GenBank) MucR family transcriptional regulator</a>                                     | Transcription                         | 50.669   | 49.280   | 59.100   | 252.158  | 1187.753 | 693.286  |
| <a href="#">AMK58_07895</a> | <a href="#">K03823 phosphinothricin acetyltransferase [EC:2.3.1.183]   (GenBank) GCN5 family acetyltransferase</a>   | Acetyltransferase                     | 99.166   | 78.536   | 81.131   | 172.380  | 48.475   | 178.990  |
| <a href="#">AMK58_07900</a> | <a href="#">K03089 RNA polymerase sigma-32 factor   (GenBank) RNA polymerase subunit sigma-70</a>                    | Transcription                         | 309.821  | 253.296  | 232.564  | 40.592   | 60.486   | 180.312  |
| <a href="#">AMK58_07905</a> | <a href="#">no KO assigned   (GenBank) chemotaxis protein</a>                                                        | Chemotaxis                            | 33.797   | 35.980   | 31.450   | 47.078   | 33.999   | 147.443  |
| <a href="#">AMK58_07910</a> | <a href="#">no KO assigned   (GenBank) acetyltransferase</a>                                                         | Acetyltransferase                     | 2780.096 | 2973.795 | 2730.477 | 163.312  | 957.614  | 415.944  |
| <a href="#">AMK58_07915</a> | <a href="#">no KO assigned   (GenBank) hypothetical protein</a>                                                      | Hypothetical                          | 1514.077 | 1638.684 | 1472.349 | 189.389  | 292.413  | 792.562  |
| <a href="#">AMK58_07920</a> | <a href="#">no KO assigned   (GenBank) hypothetical protein</a>                                                      | Hypothetical                          | 339.743  | 458.438  | 362.799  | 53.500   | 51.845   | 96.134   |
| <a href="#">AMK58_07925</a> | <a href="#">no KO assigned   (GenBank) homoserine lactone transporter</a>                                            | Transport: Amino Acid                 | 706.841  | 1149.862 | 1010.730 | 153.771  | 78.318   | 114.211  |
| <a href="#">AMK58_07930</a> | <a href="#">no KO assigned   (GenBank) hypothetical protein</a>                                                      | Hypothetical                          | 21.574   | 22.223   | 29.708   | 230.698  | 176.231  | 299.386  |
| <a href="#">AMK58_07935</a> | <a href="#">K03635 molybdopterin synthase catalytic subunit [EC:2.8.1.12]   (GenBank) molybdenum cofactor biosyn</a> | Metabolism: Co-Factors and Vitamins   | 118.701  | 129.227  | 125.151  | 212.361  | 227.415  | 142.355  |
| <a href="#">AMK58_07940</a> | <a href="#">K03636 sulfur-carrier protein   (GenBank) molybdenum cofactor biosynthesis protein MoaD</a>              | Genetic Information Processing        | 90.326   | 86.114   | 94.562   | 664.190  | 559.494  | 784.106  |
| <a href="#">AMK58_07945</a> | <a href="#">K03750 molybdopterin molybdotransferase [EC:2.10.1.1]   (GenBank) molybdopterin biosynthesis protein</a> | Biosynthesis: Co-Factors and Vitamins | 44.993   | 39.802   | 42.320   | 77.989   | 88.233   | 92.931   |
| <a href="#">AMK58_07950</a> | <a href="#">K03753 molybdopterin-guanine dinucleotide biosynthesis protein B   (GenBank) molybdopterin-guanine d</a> | Biosynthesis: Co-Factors and Vitamins | 61.225   | 90.419   | 71.295   | 65.120   | 97.430   | 76.122   |
| <a href="#">AMK58_07955</a> | <a href="#">K08744 cardiolipin synthase (CMP-forming) [EC:2.7.8.41]   (GenBank) CDP-diacylglycerol--glycerol-3-p</a> | Lipid metabolism                      | 149.761  | 191.476  | 160.452  | 509.083  | 353.353  | 376.067  |
| <a href="#">AMK58_07960</a> | <a href="#">K03703 excinuclease ABC subunit C   (GenBank) excinuclease ABC subunit C</a>                             | DNA Repair and Replication            | 50.898   | 47.225   | 45.766   | 45.539   | 94.919   | 74.429   |
| <a href="#">AMK58_07965</a> | <a href="#">no KO assigned   (GenBank) short-chain dehydrogenase</a>                                                 | dehydrogenase                         | 198.965  | 189.517  | 199.181  | 96.344   | 324.082  | 173.865  |
| <a href="#">AMK58_07970</a> | <a href="#">no KO assigned   (GenBank) hypothetical protein</a>                                                      | Hypothetical                          | 125.761  | 151.715  | 131.215  | 363.045  | 712.068  | 499.957  |
| <a href="#">AMK58_07975</a> | <a href="#">K06940 uncharacterized protein   (GenBank) hypothetical protein</a>                                      | Hypothetical                          | 273.354  | 275.919  | 285.622  | 270.310  | 877.824  | 809.808  |
| <a href="#">AMK58_07980</a> | <a href="#">K01985 5S ribosomal RNA   (GenBank) 5S ribosomal RNA</a>                                                 | Ribosome                              | 136.731  | 137.188  | 124.051  | 1261.135 | 1055.895 | 1550.483 |
| <a href="#">AMK58_07985</a> | <a href="#">K01980 23S ribosomal RNA   (GenBank) 23S ribosomal RNA</a>                                               | Ribosome                              | 3.035    | 3.416    | 3.262    | 24.449   | 14.287   | 30.912   |
| <a href="#">AMK58_07990</a> | <a href="#">K14218 tRNA Ala   (GenBank) tRNA-Ala</a>                                                                 | tRNA synthesis/modification           | 0.000    | 0.000    | 0.000    | 25.608   | 0.000    | 10.341   |
| <a href="#">AMK58_07995</a> | <a href="#">K14227 tRNA Ile   (GenBank) tRNA-Ile</a>                                                                 | tRNA synthesis/modification           | 0.000    | 0.000    | 0.000    | 0.000    | 0.000    | 0.000    |
| <a href="#">AMK58_08000</a> | <a href="#">K01977 16S ribosomal RNA   (GenBank) 16S ribosomal RNA</a>                                               | Ribosome                              | 0.000    | 0.000    | 0.000    | 0.000    | 0.000    | 0.000    |
| <a href="#">AMK58_08005</a> | <a href="#">no KO assigned   (GenBank) peptide synthetase</a>                                                        | Metabolism                            | 0.000    | 0.000    | 0.000    | 0.000    | 0.000    | 0.000    |
| <a href="#">AMK58_08010</a> | <a href="#">K01676 fumarate hydratase, class I [EC:4.2.1.21]   (GenBank) fumarate hydratase</a>                      | Metabolism: Carbohydrate              | 0.000    | 0.000    | 0.000    | 0.000    | 0.000    | 0.000    |
| <a href="#">AMK58_08015</a> | <a href="#">K03977 GTPase I   (GenBank) ribosome-associated GTPase EngA</a>                                          | Ribosome                              | 247.841  | 277.183  | 307.804  | 323.448  | 185.335  | 416.693  |
| <a href="#">AMK58_08020</a> | <a href="#">no KO assigned   (GenBank) pyrrolo-quinoline quinone</a>                                                 | Energy                                | 231.119  | 197.184  | 203.685  | 170.864  | 128.024  | 253.114  |
| <a href="#">AMK58_08025</a> | <a href="#">no KO assigned   (GenBank) hypothetical protein</a>                                                      | Hypothetical                          | 201.791  | 235.511  | 187.581  | 255.474  | 446.259  | 433.761  |
| <a href="#">AMK58_08030</a> | <a href="#">no KO assigned   (GenBank) alkyl hydroperoxide reductase</a>                                             | Defense                               | 348.826  | 272.399  | 298.687  | 348.042  | 273.167  | 192.780  |
| <a href="#">AMK58_08035</a> | <a href="#">no KO assigned   (GenBank) two-component system response regulator</a>                                   | Signal Transduction                   | 100.522  | 90.419   | 91.136   | 184.461  | 145.544  | 110.884  |

|                             |                                                                                                                          |                                     |          |          |          |          |          |          |
|-----------------------------|--------------------------------------------------------------------------------------------------------------------------|-------------------------------------|----------|----------|----------|----------|----------|----------|
| <a href="#">AMK58_08040</a> | <a href="#">no KO assigned   (GenBank) transcriptional regulator</a>                                                     | Transcription                       | 105.717  | 104.556  | 132.098  | 112.669  | 201.731  | 252.690  |
| <a href="#">AMK58_08045</a> | <a href="#">K07684 two-component system, NarL family, nitrate/nitrite response regulator NarL   (GenBank) two-co</a>     | Nitrogen                            | 3107.062 | 3461.251 | 3276.986 | 75.827   | 292.414  | 138.191  |
| <a href="#">AMK58_08050</a> | <a href="#">no KO assigned   (GenBank) hypothetical protein</a>                                                          | Hypothetical                        | 54.884   | 29.553   | 119.673  | 32.816   | 191.519  | 123.409  |
| <a href="#">AMK58_08055</a> | <a href="#">no KO assigned   (GenBank) hypothetical protein</a>                                                          | Hypothetical                        | 416.865  | 350.995  | 715.000  | 238.831  | 1529.756 | 1275.706 |
| <a href="#">AMK58_08060</a> | <a href="#">K03549 KUP system potassium uptake protein   (GenBank) trkD: potassium transport protein Kup</a>             | Transport: Ion                      | 30.055   | 20.779   | 50.540   | 143.110  | 448.333  | 186.812  |
| <a href="#">AMK58_08065</a> | <a href="#">no KO assigned   (GenBank) amino acid ABC transporter substrate-binding protein</a>                          | Membrane Transport                  | 1.366    | 4.532    | 2.308    | 81.499   | 18.930   | 156.024  |
| <a href="#">AMK58_08070</a> | <a href="#">no KO assigned   (GenBank) pseudogene</a>                                                                    | Pseudogene                          | 43.850   | 44.578   | 41.169   | 102.314  | 92.423   | 122.188  |
| <a href="#">AMK58_08075</a> | <a href="#">no KO assigned   (GenBank) hypothetical protein</a>                                                          | Hypothetical                        | 112.646  | 123.225  | 134.447  | 63.493   | 159.723  | 139.303  |
| <a href="#">AMK58_08080</a> | <a href="#">no KO assigned   (GenBank) chemotaxis protein</a>                                                            | Chemotaxis                          | 245.220  | 290.915  | 274.033  | 762.540  | 516.020  | 1138.764 |
| <a href="#">AMK58_08085</a> | <a href="#">no KO assigned   (GenBank) diguanylate cyclase</a>                                                           | Cyclic nucleotide                   | 57.516   | 71.756   | 70.433   | 104.127  | 66.998   | 108.949  |
| <a href="#">AMK58_08090</a> | <a href="#">K02225 cobalamin biosynthetic protein CobC   (GenBank) threonine-phosphate decarboxylase</a>                 | Metabolism: Co-Factors and Vitamins | 132.422  | 143.972  | 134.250  | 44.973   | 48.520   | 100.012  |
| <a href="#">AMK58_08095</a> | <a href="#">K02227 adenosylcobinamide-phosphate synthase [EC:6.3.1.10]   (GenBank) CobD/CbIb family cobalamin</a>        | Metabolism: Co-Factors and Vitamins | 56.074   | 72.110   | 66.704   | 172.122  | 109.101  | 394.751  |
| <a href="#">AMK58_08100</a> | <a href="#">K00808 homospemidine synthase [EC:2.5.1.44]   (GenBank) homospemidine synthase</a>                           | Transferase                         | 14.761   | 13.764   | 17.199   | 124.925  | 26.758   | 80.701   |
| <a href="#">AMK58_08105</a> | <a href="#">K01581 ornithine decarboxylase [EC:4.1.1.17]   (GenBank) decarboxylase</a>                                   | Metabolism: Amino Acid              | 8.451    | 8.510    | 10.112   | 115.883  | 21.348   | 61.726   |
| <a href="#">AMK58_08110</a> | <a href="#">K07216 hemerythrin   (GenBank) hypothetical protein</a>                                                      | hemerythrin                         | 784.418  | 704.943  | 876.997  | 211.923  | 444.406  | 351.506  |
| <a href="#">AMK58_08115</a> | <a href="#">K08967 L-2-dihydroxy-3-keto-5-methylthiopentene dioxygenase [EC:1.13.11.53   1.13.11.54]   (GenBank) f</a>   | Metabolism: Amino Acid              | 35.421   | 44.889   | 43.068   | 442.848  | 1044.346 | 621.464  |
| <a href="#">AMK58_08120</a> | <a href="#">K08224 MFS transporter, YNFM family, putative membrane transport protein   (GenBank) hypothetical pr</a>     | Membrane Transport                  | 30.991   | 41.079   | 30.130   | 96.511   | 52.533   | 143.225  |
| <a href="#">AMK58_08125</a> | <a href="#">no KO assigned   (GenBank) hypothetical protein</a>                                                          | Hypothetical                        | 59.081   | 55.515   | 62.768   | 127.073  | 49.262   | 90.150   |
| <a href="#">AMK58_08130</a> | <a href="#">no KO assigned   (GenBank) thioesterase</a>                                                                  | No COG                              | 21.005   | 19.741   | 25.806   | 491.932  | 109.564  | 326.742  |
| <a href="#">AMK58_08135</a> | <a href="#">no KO assigned   (GenBank) MerR family transcriptional regulator</a>                                         | Transcription                       | 64.080   | 46.015   | 55.363   | 366.053  | 86.920   | 275.104  |
| <a href="#">AMK58_08140</a> | <a href="#">K01897 long-chain acyl-CoA synthetase [EC:6.2.1.3]   (GenBank) dicarboxylate--CoA ligase PimA</a>            | Lipid metabolism                    | 8.241    | 6.312    | 10.514   | 93.877   | 12.667   | 37.554   |
| <a href="#">AMK58_08145</a> | <a href="#">no KO assigned   (GenBank) sterol carrier</a>                                                                | No COG                              | 137.923  | 159.185  | 154.610  | 286.581  | 123.321  | 256.149  |
| <a href="#">AMK58_08150</a> | <a href="#">no KO assigned   (GenBank) hypothetical protein</a>                                                          | Hypothetical                        | 265.293  | 214.835  | 233.511  | 421.222  | 235.207  | 561.526  |
| <a href="#">AMK58_08155</a> | <a href="#">no KO assigned   (GenBank) hypothetical protein</a>                                                          | Hypothetical                        | 571.813  | 510.156  | 423.315  | 240.149  | 265.024  | 371.081  |
| <a href="#">AMK58_08160</a> | <a href="#">K02049 NiT/TauT family transport system ATP-binding protein   (GenBank) ABC transporter</a>                  | Transport: NiT/TauT                 | 179.924  | 145.055  | 147.071  | 77.539   | 108.983  | 141.642  |
| <a href="#">AMK58_08165</a> | <a href="#">K02050 NiT/TauT family transport system permease protein   (GenBank) nitrate ABC transporter perma</a>       | Transport: NiT/TauT                 | 65.048   | 52.006   | 56.280   | 32.013   | 83.079   | 81.010   |
| <a href="#">AMK58_08170</a> | <a href="#">K02051 NiT/TauT family transport system substrate-binding protein   (GenBank) nitrate ABC transport</a>      | Transport: NiT/TauT                 | 35.617   | 18.654   | 14.624   | 203.236  | 58.493   | 133.823  |
| <a href="#">AMK58_08175</a> | <a href="#">K00955 bifunctional enzyme CvsN/CvsC [EC:2.7.4.2   7.1.25]   (GenBank) NodQ bifunctional enzyme</a>          | Metabolism                          | 21.826   | 3.472    | 5.035    | 65.047   | 29.178   | 55.626   |
| <a href="#">AMK58_08180</a> | <a href="#">K00957 sulfate adenylyltransferase subunit 2 [EC:2.7.7.4]   (GenBank) sulfate adenylyltransferase</a>        | Transferase                         | 101.981  | 19.013   | 29.433   | 253.646  | 72.518   | 221.052  |
| <a href="#">AMK58_08185</a> | <a href="#">K00390 phosphoadenosine phosphosulfate reductase [EC:1.8.4.8   1.8.4.10]   (GenBank) phosphoadenosine</a>    | Energy                              | 150.232  | 20.667   | 31.795   | 394.542  | 103.505  | 407.990  |
| <a href="#">AMK58_08190</a> | <a href="#">K02304 precorrin-2 dehydrogenase / sirohdrochlorin ferrochelatase [EC:1.1.3.1   76.4.99.1.4]   (GenBank)</a> | Metabolism: Co-Factors and Vitamins | 137.999  | 29.816   | 33.422   | 245.023  | 123.898  | 303.611  |
| <a href="#">AMK58_08195</a> | <a href="#">K02303 uroporphyrin-III C-methyltransferase [EC:2.1.1.107]   (GenBank) uroporphyrin-III methyltransf</a>     | Metabolism: Co-Factors and Vitamins | 14.235   | 6.138    | 6.000    | 157.075  | 26.559   | 188.341  |
| <a href="#">AMK58_08200</a> | <a href="#">no KO assigned   (GenBank) hypothetical protein</a>                                                          | Hypothetical                        | 10.785   | 10.393   | 9.262    | 247.473  | 35.588   | 246.477  |
| <a href="#">AMK58_08205</a> | <a href="#">K00381 sulfite reductase (NADPH) hemoprotein beta-component [EC:1.8.1.2]   (GenBank) sulfite reducta</a>     | Energy                              | 9.821    | 5.996    | 6.475    | 89.399   | 22.642   | 72.254   |
| <a href="#">AMK58_08210</a> | <a href="#">no KO assigned   (GenBank) hypothetical protein</a>                                                          | Hypothetical                        | 48.868   | 17.430   | 22.423   | 139.714  | 83.350   | 92.882   |
| <a href="#">AMK58_08215</a> | <a href="#">no KO assigned   (GenBank) hypothetical protein</a>                                                          | Hypothetical                        | 1185.012 | 468.259  | 487.170  | 962.930  | 1460.865 | 1476.861 |
| <a href="#">AMK58_08220</a> | <a href="#">K03455 monovalent cation:H+ antiporter-2, CPA2 family   (GenBank) cation transporter</a>                     | Transport: Ion                      | 23.888   | 7.319    | 12.165   | 47.954   | 20.119   | 29.472   |
| <a href="#">AMK58_08225</a> | <a href="#">no KO assigned   (GenBank) hypothetical protein</a>                                                          | Hypothetical                        | 43.631   | 29.325   | 47.188   | 122.005  | 62.529   | 199.759  |
| <a href="#">AMK58_08230</a> | <a href="#">K14232 tRNA Pro   (GenBank) tRNA-Pro</a>                                                                     | tRNA synthesis/modification         | 1099.107 | 657.596  | 846.199  | 3176.316 | 843.071  | 5200.856 |
| <a href="#">AMK58_08235</a> | <a href="#">no KO assigned   (GenBank) MerR family transcriptional regulator</a>                                         | Transcription                       | 73.289   | 62.129   | 62.621   | 36.152   | 17.255   | 215.815  |
| <a href="#">AMK58_08240</a> | <a href="#">K04764 integration host factor subunit alpha   (GenBank) integration host factor subunit alpha</a>           | DNA Repair and Replication          | 46.787   | 66.148   | 38.373   | 147.355  | 40.948   | 530.218  |
| <a href="#">AMK58_08245</a> | <a href="#">K00648 3-oxoacyl-[acyl-carrier-protein] synthase III [EC:2.3.1.180]   (GenBank) 3-oxoacyl-ACP syntha</a>     | Biosynthesis: Lipid                 | 68.883   | 97.489   | 61.231   | 20.690   | 80.228   | 106.263  |
| <a href="#">AMK58_08250</a> | <a href="#">K03621 glycerol-3-phosphate acyltransferase PlsX [EC:2.3.1.15]   (GenBank) phosphate acyltransferase</a>     | Lipid metabolism                    | 69.448   | 93.425   | 55.100   | 18.175   | 75.866   | 69.622   |
| <a href="#">AMK58_08255</a> | <a href="#">K02911 large subunit ribosomal protein L32   (GenBank) 50S ribosomal protein L32</a>                         | Ribosome                            | 877.467  | 703.911  | 858.441  | 782.154  | 1088.746 | 1212.633 |
| <a href="#">AMK58_08260</a> | <a href="#">no KO assigned   (GenBank) hypothetical protein</a>                                                          | Hypothetical                        | 646.130  | 591.512  | 554.045  | 186.953  | 679.572  | 321.324  |
| <a href="#">AMK58_08265</a> | <a href="#">K17662 cytochrome b pre-mRNA-processing protein 3   (GenBank) ubiquinol-cytochrome C chaperone</a>           | Chaperone                           | 521.587  | 457.339  | 414.595  | 28.500   | 438.358  | 100.270  |
| <a href="#">AMK58_08270</a> | <a href="#">no KO assigned   (GenBank) cell envelope protein SmpA</a>                                                    | Membrane                            | 264.140  | 258.120  | 259.510  | 259.567  | 959.631  | 375.192  |
| <a href="#">AMK58_08275</a> | <a href="#">K15987 K(+)-stimulated pyrophosphate-energized sodium pump [EC:3.6.1.1]   (GenBank) hppA: pyropho</a>        | Energy                              | 29.592   | 30.613   | 35.362   | 45.039   | 49.441   | 62.354   |
| <a href="#">AMK58_08280</a> | <a href="#">no KO assigned   (GenBank) hypothetical protein</a>                                                          | Hypothetical                        | 372.077  | 491.571  | 379.274  | 147.886  | 725.830  | 321.357  |
| <a href="#">AMK58_08285</a> | <a href="#">K00946 thiamine-monophosphate kinase [EC:2.7.4.16]   (GenBank) thiamine-monophosphate kinase</a>             | Signal Transduction                 | 2576.638 | 2652.304 | 2464.787 | 232.625  | 196.134  | 467.350  |
| <a href="#">AMK58_08290</a> | <a href="#">K03625 N utilization substance protein B   (GenBank) antitermination protein NusB</a>                        | Metabolism: Co-Factors and Vitamins | 67.405   | 54.283   | 61.879   | 77.272   | 44.414   | 196.521  |
| <a href="#">AMK58_08295</a> | <a href="#">K00794 6,7-dimethyl-8-ribityllumazine synthase [EC:2.5.1.78]   (GenBank) 6,7-dimethyl-8-ribityllumaz</a>     | Metabolism: Co-Factors and Vitamins | 156.746  | 183.561  | 182.952  | 422.381  | 288.869  | 371.818  |
| <a href="#">AMK58_08300</a> | <a href="#">K14652 3,4-dihydroxy-2-butanone 4-phosphate synthase / GTP cyclohydrolase II [EC:4.1.99.12   3.5.4.25]</a>   | Metabolism: Co-Factors and Vitamins | 72.107   | 89.375   | 82.272   | 113.170  | 128.956  | 76.643   |
| <a href="#">AMK58_08305</a> | <a href="#">K00793 riboflavin synthase [EC:2.5.1.9]   (GenBank) riboflavin synthase subunit alpha</a>                    | Metabolism: Co-Factors and Vitamins | 284.361  | 306.319  | 244.334  | 58.199   | 132.159  | 137.282  |
| <a href="#">AMK58_08310</a> | <a href="#">K11752 diaminohydroxyphosphoribosylaminopyrimidine deaminase / 5-amino-6-(5-phosphoribosylamino)</a>         | Metabolism: Co-Factors and Vitamins | 294.843  | 313.519  | 264.496  | 96.384   | 224.268  | 182.100  |
| <a href="#">AMK58_08315</a> | <a href="#">K07738 transcriptional repressor NrdR   (GenBank) NrdR family transcriptional regulator</a>                  | Transcription                       | 295.006  | 404.457  | 369.866  | 142.305  | 309.063  | 236.370  |
| <a href="#">AMK58_08320</a> | <a href="#">K00600 glycine hydroxymethyltransferase [EC:2.1.2.1]   (GenBank) glyA: serine hydroxymethyltransfera</a>     | Metabolism: Carbon                  | 19.579   | 25.933   | 25.026   | 112.701  | 45.364   | 60.031   |
| <a href="#">AMK58_08325</a> | <a href="#">K01808 ribose 5-phosphate isomerase B [EC:5.3.1.6]   (GenBank) ribose 5-phosphate isomerase</a>              | Metabolism                          | 577.908  | 455.446  | 622.761  | 85.598   | 362.285  | 192.314  |
| <a href="#">AMK58_08330</a> | <a href="#">no KO assigned   (GenBank) transcriptional regulator</a>                                                     | Transcription                       | 1510.708 | 1213.738 | 1497.843 | 448.933  | 1233.728 | 753.775  |
| <a href="#">AMK58_08335</a> | <a href="#">no KO assigned   (GenBank) pseudogene</a>                                                                    | Pseudogene                          | 618.827  | 733.402  | 694.977  | 187.715  | 794.507  | 612.805  |
| <a href="#">AMK58_08340</a> | <a href="#">no KO assigned   (GenBank) hypothetical protein</a>                                                          | Hypothetical                        | 2272.021 | 1943.832 | 2047.506 | 335.051  | 677.106  | 562.272  |
| <a href="#">AMK58_08345</a> | <a href="#">no KO assigned   (GenBank) hypothetical protein</a>                                                          | Hypothetical                        | 233.889  | 320.081  | 230.238  | 57.856   | 149.358  | 150.568  |
| <a href="#">AMK58_08350</a> | <a href="#">no KO assigned   (GenBank) hypothetical protein</a>                                                          | Hypothetical                        | 184.904  | 196.657  | 179.890  | 84.352   | 104.885  | 242.057  |
| <a href="#">AMK58_08355</a> | <a href="#">no KO assigned   (GenBank) hypothetical protein</a>                                                          | Hypothetical                        | 16.720   | 15.500   | 26.039   | 132.066  | 2604.889 | 431.971  |
| <a href="#">AMK58_08360</a> | <a href="#">no KO assigned   (GenBank) hypothetical protein</a>                                                          | Hypothetical                        | 100.765  | 101.114  | 110.415  | 141.259  | 171.636  | 294.316  |
| <a href="#">AMK58_08365</a> | <a href="#">K02348 ElaA protein   (GenBank) hypothetical protein</a>                                                     | No COG                              | 145.559  | 178.428  | 168.074  | 194.623  | 180.550  | 211.067  |
| <a href="#">AMK58_08370</a> | <a href="#">no KO assigned   (GenBank) hypothetical protein</a>                                                          | Hypothetical                        | 35.665   | 42.990   | 34.208   | 64.958   | 34.287   | 133.592  |

|                             |                                                                                                                     |                                     |          |          |          |          |          |          |
|-----------------------------|---------------------------------------------------------------------------------------------------------------------|-------------------------------------|----------|----------|----------|----------|----------|----------|
| <a href="#">AMK58_08375</a> | <a href="#">K10747 DNA ligase I [EC:6.5.1.1.6.5.1.71] (GenBank) ATP-dependent DNA ligase</a>                        | DNA Repair and Replication          | 16.113   | 20.170   | 16.998   | 85.204   | 18.715   | 38.988   |
| <a href="#">AMK58_08380</a> | <a href="#">K07577 putative mRNA 3-end processing factor I (GenBank) DNA ligase-associated DEXH box helicase</a>    | DNA Repair and Replication          | 58.596   | 62.564   | 73.837   | 60.839   | 60.839   | 181.879  |
| <a href="#">AMK58_08385</a> | <a href="#">K16329 pseudouridylyl synthase [EC:4.2.1.70] (GenBank) pseudouridine-5-phosphate glycosylase</a>        | Metabolism: Nucleotide              | 27.344   | 34.558   | 34.373   | 466.130  | 139.492  | 388.860  |
| <a href="#">AMK58_08390</a> | <a href="#">no KO assigned   (GenBank) hypothetical protein</a>                                                     | Hypothetical                        | 49.424   | 69.889   | 52.276   | 417.217  | 276.789  | 296.403  |
| <a href="#">AMK58_08395</a> | <a href="#">K00772 5'-methylthioadenosine phosphorylase [EC:2.4.2.28] (GenBank) 5'-methylthioadenosine phospho</a>  | Metabolism: Amino Acid              | 22.163   | 25.338   | 23.024   | 170.982  | 52.900   | 191.429  |
| <a href="#">AMK58_08400</a> | <a href="#">no KO assigned   (GenBank) hypothetical protein</a>                                                     | Hypothetical                        | 228.639  | 314.592  | 258.235  | 71.464   | 62.303   | 127.689  |
| <a href="#">AMK58_08405</a> | <a href="#">K09800 translocation and assembly module TamB   (GenBank) hypothetical protein</a>                      | Hypothetical                        | 28.759   | 28.693   | 29.427   | 24.115   | 44.796   | 36.069   |
| <a href="#">AMK58_08410</a> | <a href="#">K07278 translocation and assembly module TamA   (GenBank) hypothetical protein</a>                      | Hypothetical                        | 29.025   | 32.617   | 37.322   | 117.937  | 168.718  | 65.619   |
| <a href="#">AMK58_08415</a> | <a href="#">K06207 GTP-binding protein   (GenBank) GTP-binding protein TvpA</a>                                     | Enzyme                              | 42.280   | 52.262   | 54.188   | 374.261  | 194.195  | 171.200  |
| <a href="#">AMK58_08420</a> | <a href="#">no KO assigned   (GenBank) peroxiredoxin</a>                                                            | No COG                              | 132.825  | 141.924  | 159.321  | 715.123  | 261.850  | 486.028  |
| <a href="#">AMK58_08425</a> | <a href="#">no KO assigned   (GenBank) hypothetical protein</a>                                                     | Hypothetical                        | 489.592  | 422.946  | 538.480  | 1173.410 | 1878.532 | 2070.547 |
| <a href="#">AMK58_08430</a> | <a href="#">no KO assigned   (GenBank) diadenosine tetraphosphate hydrolase</a>                                     | Hydrolase                           | 182.502  | 246.437  | 226.570  | 64.795   | 106.073  | 262.788  |
| <a href="#">AMK58_08435</a> | <a href="#">no KO assigned   (GenBank) cellulose synthase</a>                                                       | Metabolism: Carbohydrates           | 14.798   | 15.243   | 18.216   | 17.524   | 210.032  | 97.042   |
| <a href="#">AMK58_08440</a> | <a href="#">no KO assigned   (GenBank) hypothetical protein</a>                                                     | Hypothetical                        | 51.134   | 32.773   | 32.226   | 44.352   | 176.613  | 201.649  |
| <a href="#">AMK58_08445</a> | <a href="#">no KO assigned   (GenBank) hypothetical protein</a>                                                     | Hypothetical                        | 1859.112 | 2053.002 | 2087.434 | 587.238  | 3479.581 | 1695.435 |
| <a href="#">AMK58_08450</a> | <a href="#">no KO assigned   (GenBank) Crp/Fnr family transcriptional regulator</a>                                 | Transcription                       | 37.964   | 44.954   | 44.226   | 95.067   | 67.470   | 273.697  |
| <a href="#">AMK58_08455</a> | <a href="#">no KO assigned   (GenBank) hypothetical protein</a>                                                     | Hypothetical                        | 37.141   | 27.956   | 39.485   | 146.124  | 202.825  | 277.420  |
| <a href="#">AMK58_08460</a> | <a href="#">K16168 methyltransferase   (GenBank) hypothetical protein</a>                                           | methyltransferase                   | 105.604  | 115.201  | 94.440   | 287.730  | 162.052  | 381.717  |
| <a href="#">AMK58_08465</a> | <a href="#">K16167 alkylresorcinol/alkylpyrone synthase   (GenBank) chalcone synthase</a>                           | Biosynthesis                        | 10.263   | 11.711   | 15.130   | 63.639   | 43.420   | 103.181  |
| <a href="#">AMK58_08470</a> | <a href="#">no KO assigned   (GenBank) hypothetical protein</a>                                                     | Hypothetical                        | 14.509   | 15.942   | 25.053   | 129.570  | 65.985   | 82.733   |
| <a href="#">AMK58_08475</a> | <a href="#">no KO assigned   (GenBank) hypothetical protein</a>                                                     | Hypothetical                        | 34.816   | 35.658   | 44.318   | 310.856  | 213.884  | 202.929  |
| <a href="#">AMK58_08480</a> | <a href="#">no KO assigned   (GenBank) hypothetical protein</a>                                                     | Hypothetical                        | 532.505  | 458.795  | 499.915  | 389.697  | 1217.278 | 1044.732 |
| <a href="#">AMK58_08485</a> | <a href="#">no KO assigned   (GenBank) transposase</a>                                                              | Genetic Information Processing      | 58.604   | 86.495   | 59.398   | 64.157   | 91.286   | 224.815  |
| <a href="#">AMK58_08490</a> | <a href="#">K03655 ATP-dependent DNA helicase RecG [EC:3.6.4.12] (GenBank) ATP-dependent DNA helicase R</a>         | DNA Repair and Replication          | 1.338    | 0.000    | 0.885    | 1.636    | 0.588    | 10.893   |
| <a href="#">AMK58_08495</a> | <a href="#">K02232 adenosylcobvric acid synthase [EC:6.3.5.10] (GenBank) cobalamin biosynthesis protein CobO</a>    | Metabolism: Co-Factors and Vitamins | 46.599   | 62.144   | 60.685   | 247.570  | 144.418  | 343.599  |
| <a href="#">AMK58_08500</a> | <a href="#">K19221 cob(D)alamin adenosyltransferase [EC:2.5.1.17] (GenBank) cob(D)yrinic acid a,c-diamide aden</a>  | Metabolism: Co-Factors and Vitamins | 27.911   | 30.421   | 37.656   | 457.000  | 40.701   | 223.490  |
| <a href="#">AMK58_08505</a> | <a href="#">K02231 adenosylcobinamide kinase / adenosylcobinamide-phosphate guanvyltransferase [EC:2.7.1.156.2</a>  | Metabolism: Co-Factors and Vitamins | 49.814   | 45.468   | 50.433   | 143.032  | 39.921   | 206.149  |
| <a href="#">AMK58_08510</a> | <a href="#">no KO assigned   (GenBank) esterase</a>                                                                 | esterase                            | 12.776   | 12.841   | 13.624   | 205.531  | 37.983   | 82.154   |
| <a href="#">AMK58_08515</a> | <a href="#">no KO assigned   (GenBank) hypothetical protein</a>                                                     | Hypothetical                        | 54.396   | 41.934   | 58.394   | 1091.817 | 136.586  | 492.197  |
| <a href="#">AMK58_08520</a> | <a href="#">no KO assigned   (GenBank) hypothetical protein</a>                                                     | Hypothetical                        | 94.272   | 156.451  | 147.926  | 183.233  | 79.994   | 103.985  |
| <a href="#">AMK58_08525</a> | <a href="#">no KO assigned   (GenBank) hypothetical protein</a>                                                     | Hypothetical                        | 118.437  | 143.410  | 149.479  | 187.980  | 102.885  | 216.468  |
| <a href="#">AMK58_08530</a> | <a href="#">no KO assigned   (GenBank) disulfide bond formation protein Dsba</a>                                    | Oxidoreductase                      | 26.844   | 34.287   | 27.460   | 130.691  | 45.781   | 61.113   |
| <a href="#">AMK58_08535</a> | <a href="#">K15034 ribosome-associated protein   (GenBank) peptide chain release factor I</a>                       | Translation                         | 208.710  | 270.397  | 299.857  | 361.829  | 347.038  | 276.932  |
| <a href="#">AMK58_08540</a> | <a href="#">no KO assigned   (GenBank) hypothetical protein</a>                                                     | Hypothetical                        | 84.352   | 145.540  | 138.281  | 137.834  | 830.455  | 236.339  |
| <a href="#">AMK58_08545</a> | <a href="#">no KO assigned   (GenBank) hypothetical protein</a>                                                     | Hypothetical                        | 3.040    | 4.250    | 5.781    | 27.724   | 180.803  | 51.877   |
| <a href="#">AMK58_08550</a> | <a href="#">K09707 uncharacterized protein   (GenBank) amino acid-binding protein</a>                               | No COG                              | 8.749    | 6.745    | 21.467   | 765.185  | 308.351  | 751.867  |
| <a href="#">AMK58_08555</a> | <a href="#">K03723 transcription-repair coupling factor (superfamily II helicase) [EC:3.6.4.-] (GenBank) trans</a>  | Transcription                       | 0.768    | 0.997    | 1.143    | 29.960   | 4.653    | 9.843    |
| <a href="#">AMK58_08560</a> | <a href="#">K09159 antitoxin CptB   (GenBank) hypothetical protein</a>                                              | Defense                             | 407.978  | 470.300  | 509.107  | 1889.492 | 1076.169 | 1901.174 |
| <a href="#">AMK58_08565</a> | <a href="#">no KO assigned   (GenBank) enoyl-CoA hydratase</a>                                                      | Hydratase                           | 33.994   | 39.877   | 35.864   | 51.151   | 91.427   | 87.225   |
| <a href="#">AMK58_08570</a> | <a href="#">no KO assigned   (GenBank) hypothetical protein</a>                                                     | Hypothetical                        | 8.315    | 15.751   | 8.677    | 295.575  | 15.501   | 118.287  |
| <a href="#">AMK58_08575</a> | <a href="#">no KO assigned   (GenBank) hypothetical protein</a>                                                     | Hypothetical                        | 323.146  | 471.100  | 380.274  | 110.746  | 51.860   | 72.081   |
| <a href="#">AMK58_08580</a> | <a href="#">no KO assigned   (GenBank) ferredoxin</a>                                                               | Ferredoxin                          | 64.719   | 67.339   | 139.318  | 835.769  | 852.115  | 1040.770 |
| <a href="#">AMK58_08585</a> | <a href="#">K00763 nicotinate phosphoribosyltransferase [EC:6.3.4.21] (GenBank) nicotinate phosphoribosyltrans</a>  | Metabolism: Co-Factors and Vitamins | 3.433    | 4.350    | 3.066    | 27.449   | 39.635   | 67.034   |
| <a href="#">AMK58_08590</a> | <a href="#">no KO assigned   (GenBank) hypothetical protein</a>                                                     | Hypothetical                        | 270.432  | 227.829  | 263.172  | 505.288  | 288.260  | 689.530  |
| <a href="#">AMK58_08595</a> | <a href="#">K00383 glutathione reductase (NADPH) [EC:1.8.1.7] (GenBank) glutathione reductase</a>                   | Enzyme                              | 11.902   | 9.089    | 11.571   | 73.121   | 13.177   | 90.695   |
| <a href="#">AMK58_08600</a> | <a href="#">K07217 Mn-containing catalase   (GenBank) Mn-containing catalase</a>                                    | Enzyme                              | 325.701  | 293.536  | 304.674  | 245.539  | 216.657  | 233.426  |
| <a href="#">AMK58_08605</a> | <a href="#">K08218 MFS transporter, PAT family, beta-lactamase induction signal transducer AmpG   (GenBank) MF</a>  | Transport: MFS                      | 44.863   | 34.446   | 38.973   | 96.660   | 1079.430 | 159.550  |
| <a href="#">AMK58_08610</a> | <a href="#">K01626 3-deoxy-7-phosphoheptulonate synthase [EC:2.5.1.54] (GenBank) phospho-2-dehydro-3-deoxytr</a>    | Biosynthesis: Amino Acid            | 23.062   | 25.051   | 25.831   | 153.527  | 91.613   | 183.552  |
| <a href="#">AMK58_08615</a> | <a href="#">no KO assigned   (GenBank) hypothetical protein</a>                                                     | Hypothetical                        | 902.047  | 780.841  | 871.397  | 631.558  | 676.861  | 680.310  |
| <a href="#">AMK58_08620</a> | <a href="#">K00135 succinate-semialdehyde dehydrogenase / glutarate-semialdehyde dehydrogenase [EC:1.2.1.16.1.2</a> | Metabolism                          | 66.291   | 76.015   | 79.135   | 54.171   | 56.204   | 82.962   |
| <a href="#">AMK58_08625</a> | <a href="#">K01918 pantoate-beta-alanine ligase [EC:6.3.2.1] (GenBank) pantoate-beta-alanine ligase</a>             | Metabolism: Co-Factors and Vitamins | 416.220  | 417.289  | 441.871  | 249.377  | 279.976  | 249.236  |
| <a href="#">AMK58_08630</a> | <a href="#">no KO assigned   (GenBank) sugar tyrosine-protein kinase</a>                                            | Signal Transduction                 | 234.078  | 249.886  | 219.075  | 867.940  | 412.404  | 877.745  |
| <a href="#">AMK58_08635</a> | <a href="#">K14237 tRNA Val   (GenBank) tRNA-Val</a>                                                                | tRNA synthesis/modification         | 1067.072 | 1128.435 | 996.163  | 339.509  | 328.438  | 799.360  |
| <a href="#">AMK58_08640</a> | <a href="#">K14237 tRNA Val   (GenBank) tRNA-Val</a>                                                                | tRNA synthesis/modification         | 1209.134 | 1475.645 | 1378.357 | 188.136  | 919.990  | 977.495  |
| <a href="#">AMK58_08645</a> | <a href="#">no KO assigned   (GenBank) hypothetical protein</a>                                                     | Hypothetical                        | 121.478  | 139.045  | 136.992  | 18.021   | 61.393   | 94.556   |
| <a href="#">AMK58_08650</a> | <a href="#">no KO assigned   (GenBank) hypothetical protein</a>                                                     | Hypothetical                        | 176.188  | 197.043  | 234.777  | 548.758  | 954.116  | 706.615  |
| <a href="#">AMK58_08655</a> | <a href="#">K01091 phosphoglycolate phosphatase [EC:3.1.3.18] (GenBank) phosphoglycolate phosphatase</a>            | Metabolism: Carbohydrate            | 55.293   | 43.550   | 60.011   | 79.783   | 129.898  | 113.424  |
| <a href="#">AMK58_08660</a> | <a href="#">K04042 bifunctional UDP-N-acetylglucosamine pyrophosphorylase / Glucosamine-1-phosphate N-acetyltr</a>  | Metabolism: Carbohydrate            | 27.054   | 34.674   | 29.968   | 117.573  | 16.259   | 59.529   |
| <a href="#">AMK58_08665</a> | <a href="#">K00820 glucosamine-fructose-6-phosphate aminotransferase (isomerizing) [EC:2.6.1.16] (GenBank) gl</a>   | Metabolism: Amino Acid              | 43.473   | 34.841   | 37.743   | 174.614  | 29.424   | 145.207  |
| <a href="#">AMK58_08670</a> | <a href="#">no KO assigned   (GenBank) hypothetical protein</a>                                                     | Hypothetical                        | 497.683  | 394.893  | 517.644  | 385.329  | 176.134  | 460.726  |
| <a href="#">AMK58_08675</a> | <a href="#">no KO assigned   (GenBank) hypothetical protein</a>                                                     | Hypothetical                        | 38.414   | 27.098   | 25.523   | 106.512  | 9.260    | 135.187  |
| <a href="#">AMK58_08680</a> | <a href="#">no KO assigned   (GenBank) hypothetical protein</a>                                                     | Hypothetical                        | 261.917  | 376.440  | 358.670  | 903.607  | 74.527   | 613.283  |
| <a href="#">AMK58_08685</a> | <a href="#">K03719 Lrp/AsnC family transcriptional regulator, leucine-responsive regulatory protein   (GenBank)</a> | Transcription                       | 1.062    | 4.759    | 8.583    | 219.449  | 12.236   | 95.774   |
| <a href="#">AMK58_08690</a> | <a href="#">no KO assigned   (GenBank) lysine transporter LysE</a>                                                  | Transport: Amino Acid               | 10.090   | 5.796    | 12.361   | 121.639  | 27.917   | 139.078  |
| <a href="#">AMK58_08695</a> | <a href="#">K07001 NTE family protein   (GenBank) patatin</a>                                                       | Metabolism: Lipid                   | 8.723    | 20.846   | 14.929   | 126.352  | 33.206   | 67.836   |
| <a href="#">AMK58_08700</a> | <a href="#">K06968 23S rRNA (cytidine2498-2'-O)-methyltransferase [EC:2.1.1.186] (GenBank) methyltransferase</a>    | Ribosome                            | 29.260   | 26.372   | 34.895   | 292.104  | 124.185  | 139.869  |
| <a href="#">AMK58_08705</a> | <a href="#">no KO assigned   (GenBank) hypothetical protein</a>                                                     | Hypothetical                        | 43.453   | 39.200   | 45.318   | 183.578  | 102.139  | 163.354  |

|                             |                                                                                                                       |                                     |          |          |          |          |          |          |
|-----------------------------|-----------------------------------------------------------------------------------------------------------------------|-------------------------------------|----------|----------|----------|----------|----------|----------|
| <a href="#">AMK58_08710</a> | <a href="#">K02192 bacterioferritin-associated ferredoxin   (GenBank) (2Fe-2S)-binding protein</a>                    | Ferredoxin                          | 114.273  | 132.751  | 142.282  | 676.078  | 610.126  | 936.422  |
| <a href="#">AMK58_08715</a> | <a href="#">no KO assigned   (GenBank) hypothetical protein</a>                                                       | Hypothetical                        | 1725.976 | 1750.926 | 1414.779 | 177.849  | 211.559  | 446.630  |
| <a href="#">AMK58_08720</a> | <a href="#">K07716 two-component system, cell cycle sensor histidine kinase PleC   EC:2.7.13.31   (GenBank) histi</a> | Signal Transduction                 | 92.179   | 174.278  | 140.897  | 53.510   | 165.950  | 54.416   |
| <a href="#">AMK58_08725</a> | <a href="#">K11712 two-component system, LuxR family, response regulator DetR   (GenBank) two-component syste</a>     | Signal Transduction                 | 325.677  | 404.263  | 461.239  | 481.985  | 1252.825 | 561.721  |
| <a href="#">AMK58_08730</a> | <a href="#">K11711 two-component system, LuxR family, sensor histidine kinase DetS   EC:2.7.13.31   (GenBank) PA</a>  | Signal Transduction                 | 24.382   | 25.999   | 21.936   | 82.251   | 39.401   | 39.137   |
| <a href="#">AMK58_08735</a> | <a href="#">K11688 C4-dicarboxylate-binding protein DetP   (GenBank) C4-dicarboxylate ABC transporter</a>             | Transport                           | 137.721  | 146.674  | 142.788  | 461.532  | 167.727  | 402.883  |
| <a href="#">AMK58_08740</a> | <a href="#">K11689 C4-dicarboxylate transporter, DetO subunit   (GenBank) C4-dicarboxylate ABC transporter perme</a>  | Transport                           | 2365.413 | 1513.515 | 1877.950 | 150.952  | 388.052  | 360.624  |
| <a href="#">AMK58_08745</a> | <a href="#">K11690 C4-dicarboxylate transporter, DetM subunit   (GenBank) C4-dicarboxylate ABC transporter perme</a>  | Transport                           | 257.435  | 144.782  | 185.927  | 23.597   | 77.319   | 91.613   |
| <a href="#">AMK58_08750</a> | <a href="#">K06193 protein PhnA   (GenBank) PhnA protein</a>                                                          | No COG                              | 1136.814 | 630.150  | 899.991  | 414.324  | 295.059  | 615.125  |
| <a href="#">AMK58_08755</a> | <a href="#">no KO assigned   (GenBank) hypothetical protein</a>                                                       | Hypothetical                        | 29.076   | 23.976   | 20.374   | 79.419   | 9.277    | 82.289   |
| <a href="#">AMK58_08760</a> | <a href="#">K02030 polar amino acid transport system substrate-binding protein   (GenBank) hypothetical protein</a>   | Transport: Amino Acid               | 51.889   | 68.891   | 75.223   | 420.053  | 75.427   | 326.117  |
| <a href="#">AMK58_08765</a> | <a href="#">no KO assigned   (GenBank) dehydrogenase</a>                                                              | Dehydrogenase                       | 24.368   | 29.259   | 28.387   | 62.361   | 20.427   | 96.458   |
| <a href="#">AMK58_08770</a> | <a href="#">K00459 nitronate monooxygenase   EC:1.13.12.16   (GenBank) nitronate monooxygenase</a>                    | Nitrogen                            | 150.155  | 173.077  | 184.295  | 444.049  | 143.177  | 367.568  |
| <a href="#">AMK58_08775</a> | <a href="#">K13590 diguanylate cyclase   EC:2.7.7.65   (GenBank) diguanylate cyclase</a>                              | cyclic nucleotide                   | 13.997   | 15.331   | 20.185   | 254.216  | 74.602   | 80.363   |
| <a href="#">AMK58_08780</a> | <a href="#">no KO assigned   (GenBank) hypothetical protein</a>                                                       | Hypothetical                        | 346.231  | 273.550  | 378.793  | 314.887  | 1316.363 | 440.325  |
| <a href="#">AMK58_08785</a> | <a href="#">K07107 acyl-CoA thioester hydrolase   EC:3.1.2.-1   (GenBank) thioesterase-like protein</a>               | Hydrolase                           | 554.009  | 495.389  | 525.128  | 100.588  | 1659.787 | 225.673  |
| <a href="#">AMK58_08790</a> | <a href="#">K00548 5-methyltetrahydrofolate-homocysteine methyltransferase   EC:2.1.1.131   (GenBank) methionine</a>  | Metabolism: Amino Acid              | 18.515   | 21.750   | 21.263   | 31.490   | 24.787   | 38.677   |
| <a href="#">AMK58_08795</a> | <a href="#">no KO assigned   (GenBank) hypothetical protein</a>                                                       | Hypothetical                        | 866.425  | 911.062  | 929.452  | 1066.184 | 826.608  | 1498.113 |
| <a href="#">AMK58_08800</a> | <a href="#">K00297 methylenetetrahydrofolate reductase (NADPH)   EC:1.1.1.20   (GenBank) 5,10-methylenetetrahyd</a>   | Energy                              | 100.484  | 121.379  | 90.973   | 114.560  | 85.945   | 223.903  |
| <a href="#">AMK58_08805</a> | <a href="#">no KO assigned   (GenBank) ArsR family transcriptional regulator</a>                                      | Transcription                       | 57.092   | 47.783   | 61.069   | 146.363  | 76.483   | 178.103  |
| <a href="#">AMK58_08810</a> | <a href="#">K04754 phospholipid-binding lipoprotein MlaA   (GenBank) hypothetical protein</a>                         | Membrane                            | 26.646   | 24.205   | 26.224   | 273.023  | 180.056  | 200.698  |
| <a href="#">AMK58_08815</a> | <a href="#">K07323 phospholipid transport system substrate-binding protein   (GenBank) toluene tolerance protein</a>  | Transport: Membrane                 | 415.337  | 452.975  | 393.789  | 234.356  | 101.740  | 258.693  |
| <a href="#">AMK58_08820</a> | <a href="#">no KO assigned   (GenBank) hypothetical protein</a>                                                       | Hypothetical                        | 178.589  | 169.369  | 173.921  | 68.070   | 906.737  | 124.769  |
| <a href="#">AMK58_08825</a> | <a href="#">no KO assigned   (GenBank) ABC transporter ATP-binding protein</a>                                        | Membrane Transport                  | 94.939   | 97.483   | 90.063   | 170.697  | 138.365  | 151.701  |
| <a href="#">AMK58_08830</a> | <a href="#">K09768 uncharacterized protein   (GenBank) hypothetical protein</a>                                       | Hypothetical                        | 1240.360 | 1028.677 | 1026.988 | 405.305  | 1752.569 | 814.010  |
| <a href="#">AMK58_08835</a> | <a href="#">K02342 DNA polymerase III subunit epsilon   EC:2.7.7.7   (GenBank) hypothetical protein</a>               | DNA Repair and Replication          | 6.174    | 9.909    | 8.936    | 75.292   | 44.225   | 88.944   |
| <a href="#">AMK58_08840</a> | <a href="#">no KO assigned   (GenBank) hypothetical protein</a>                                                       | Hypothetical                        | 37.172   | 41.244   | 56.213   | 398.826  | 113.610  | 148.216  |
| <a href="#">AMK58_08845</a> | <a href="#">no KO assigned   (GenBank) hypothetical protein</a>                                                       | Hypothetical                        | 43.067   | 59.875   | 57.946   | 581.620  | 181.762  | 463.144  |
| <a href="#">AMK58_08850</a> | <a href="#">no KO assigned   (GenBank) hypothetical protein</a>                                                       | Hypothetical                        | 86.570   | 75.465   | 113.654  | 278.564  | 89.690   | 310.241  |
| <a href="#">AMK58_08855</a> | <a href="#">K03594 bacterioferritin   EC:1.16.3.11   (GenBank) bacterioferritin</a>                                   | Metabolism: Co-Factors and Vitamins | 116.591  | 168.188  | 174.573  | 121.806  | 98.850   | 209.755  |
| <a href="#">AMK58_08860</a> | <a href="#">K00705 4-alpha-glucanotransferase   EC:2.4.1.25   (GenBank) 4-alpha-glucanotransferase</a>                | Metabolism: Carbohydrates           | 246.517  | 328.318  | 236.125  | 19.107   | 74.199   | 55.827   |
| <a href="#">AMK58_08865</a> | <a href="#">no KO assigned   (GenBank) regulator</a>                                                                  | Signal Transduction                 | 93.019   | 92.738   | 92.489   | 372.273  | 189.083  | 264.308  |
| <a href="#">AMK58_08870</a> | <a href="#">K01214 isoamylase   EC:3.2.1.68   (GenBank) glycogen debranching protein</a>                              | Metabolism: Carbohydrate            | 17.449   | 24.549   | 21.140   | 146.050  | 34.862   | 80.118   |
| <a href="#">AMK58_08875</a> | <a href="#">K00700 1,4-alpha-glucan branching enzyme   EC:2.4.1.18   (GenBank) glycogen branching protein</a>         | Metabolism: Carbohydrate            | 96.753   | 88.144   | 101.345  | 148.939  | 149.973  | 219.583  |
| <a href="#">AMK58_08880</a> | <a href="#">K05343 maltose alpha-D-glucosyltransferase / alpha-amylase   EC:5.4.99.16 3.2.1.11   (GenBank) alpha-</a> | Metabolism: Carbohydrate            | 79.551   | 77.471   | 84.400   | 110.710  | 204.713  | 163.000  |
| <a href="#">AMK58_08885</a> | <a href="#">K07216 hemerythrin   (GenBank) hypothetical protein</a>                                                   | hemerythrin                         | 555.274  | 545.427  | 596.237  | 984.300  | 1788.609 | 1345.946 |
| <a href="#">AMK58_08890</a> | <a href="#">no KO assigned   (GenBank) GCN5 family acetyltransferase</a>                                              | Acetyltransferase                   | 39.225   | 47.411   | 36.002   | 39.787   | 46.129   | 237.364  |
| <a href="#">AMK58_08895</a> | <a href="#">K01082 3'(2'), 5'-bisphosphate nucleotidase   EC:3.1.3.71   (GenBank) 3'(2'),5'-bisphosphate nucleoti</a> | Energy                              | 6.257    | 14.953   | 8.775    | 191.103  | 12.836   | 153.319  |
| <a href="#">AMK58_08900</a> | <a href="#">no KO assigned   (GenBank) rhamnosyltransferase</a>                                                       | Transferase                         | 246.246  | 193.983  | 244.087  | 211.167  | 89.023   | 182.895  |
| <a href="#">AMK58_08905</a> | <a href="#">no KO assigned   (GenBank) acyl-CoA dehydrogenase</a>                                                     | dehydrogenase                       | 98.723   | 103.866  | 108.330  | 297.757  | 93.869   | 202.373  |
| <a href="#">AMK58_08910</a> | <a href="#">no KO assigned   (GenBank) aminoglycoside phosphotransferase</a>                                          | Transferase                         | 29.940   | 37.347   | 39.207   | 54.503   | 19.477   | 40.169   |
| <a href="#">AMK58_08915</a> | <a href="#">no KO assigned   (GenBank) acyl-CoA dehydrogenase</a>                                                     | dehydrogenase                       | 111.466  | 145.638  | 132.911  | 167.335  | 31.721   | 73.815   |
| <a href="#">AMK58_08920</a> | <a href="#">no KO assigned   (GenBank) 2-deoxy-D-glucanate 3-dehydrogenase</a>                                        | Dehydrogenase                       | 529.742  | 524.006  | 578.767  | 238.596  | 70.547   | 259.605  |
| <a href="#">AMK58_08925</a> | <a href="#">K00666 fatty-acyl-CoA synthase   EC:6.2.1.-1   (GenBank) acyl-CoA synthetase</a>                          | Lipid biosynthesis                  | 50.874   | 72.999   | 63.157   | 75.191   | 12.236   | 37.492   |
| <a href="#">AMK58_08930</a> | <a href="#">no KO assigned   (GenBank) hypothetical protein</a>                                                       | Hypothetical                        | 695.803  | 849.418  | 727.972  | 481.174  | 174.493  | 342.244  |
| <a href="#">AMK58_08935</a> | <a href="#">no KO assigned   (GenBank) hypothetical protein</a>                                                       | Hypothetical                        | 5.825    | 2.784    | 11.565   | 29.778   | 19.382   | 65.858   |
| <a href="#">AMK58_08940</a> | <a href="#">K01768 adenylate cyclase   EC:4.6.1.1   (GenBank) hypothetical protein</a>                                | Metabolism: Nucleotide              | 16.437   | 21.158   | 25.031   | 308.440  | 34.849   | 195.976  |
| <a href="#">AMK58_08945</a> | <a href="#">no KO assigned   (GenBank) hypothetical protein</a>                                                       | Hypothetical                        | 2.585    | 4.751    | 6.711    | 339.019  | 32.180   | 148.126  |
| <a href="#">AMK58_08950</a> | <a href="#">no KO assigned   (GenBank) hypothetical protein</a>                                                       | Hypothetical                        | 27.444   | 38.579   | 40.420   | 912.566  | 154.844  | 390.199  |
| <a href="#">AMK58_08955</a> | <a href="#">no KO assigned   (GenBank) hypothetical protein</a>                                                       | Hypothetical                        | 22.956   | 35.394   | 37.317   | 123.499  | 345.019  | 190.549  |
| <a href="#">AMK58_08960</a> | <a href="#">no KO assigned   (GenBank) hypothetical protein</a>                                                       | Hypothetical                        | 2.342    | 2.469    | 2.881    | 73.251   | 34.681   | 74.846   |
| <a href="#">AMK58_08965</a> | <a href="#">no KO assigned   (GenBank) peptidoglycan-binding protein</a>                                              | Cell Wall                           | 1.160    | 1.848    | 3.529    | 117.238  | 17.381   | 59.433   |
| <a href="#">AMK58_08970</a> | <a href="#">no KO assigned   (GenBank) pseudogene</a>                                                                 | Pseudogene                          | 17.255   | 8.736    | 37.817   | 399.197  | 162.063  | 697.211  |
| <a href="#">AMK58_08975</a> | <a href="#">no KO assigned   (GenBank) ATPase</a>                                                                     | enzyme                              | 6.517    | 0.000    | 15.969   | 190.728  | 35.221   | 229.421  |
| <a href="#">AMK58_08980</a> | <a href="#">no KO assigned   (GenBank) mechanosensitive ion channel protein MscS</a>                                  | Transport: Ion                      | 7.765    | 6.104    | 12.921   | 71.307   | 10.336   | 98.532   |
| <a href="#">AMK58_08985</a> | <a href="#">no KO assigned   (GenBank) hypothetical protein</a>                                                       | Hypothetical                        | 39.530   | 36.477   | 55.395   | 175.632  | 61.300   | 99.891   |
| <a href="#">AMK58_08990</a> | <a href="#">no KO assigned   (GenBank) transcriptional regulator</a>                                                  | Transcription                       | 129.501  | 164.279  | 179.847  | 484.775  | 145.565  | 319.331  |
| <a href="#">AMK58_08995</a> | <a href="#">no KO assigned   (GenBank) hypothetical protein</a>                                                       | Hypothetical                        | 38.228   | 35.943   | 59.109   | 159.500  | 16.483   | 69.733   |
| <a href="#">AMK58_09000</a> | <a href="#">no KO assigned   (GenBank) hypothetical protein</a>                                                       | Hypothetical                        | 4.684    | 8.611    | 16.103   | 605.784  | 255.580  | 564.356  |
| <a href="#">AMK58_09005</a> | <a href="#">no KO assigned   (GenBank) hypothetical protein</a>                                                       | Hypothetical                        | 502.442  | 491.085  | 477.374  | 85.309   | 160.232  | 331.316  |
| <a href="#">AMK58_09010</a> | <a href="#">no KO assigned   (GenBank) hypothetical protein</a>                                                       | Hypothetical                        | 72.068   | 98.170   | 110.322  | 92.678   | 36.130   | 81.529   |
| <a href="#">AMK58_09015</a> | <a href="#">no KO assigned   (GenBank) hypothetical protein</a>                                                       | Hypothetical                        | 77.957   | 72.129   | 121.022  | 420.020  | 278.390  | 214.944  |
| <a href="#">AMK58_09020</a> | <a href="#">K03724 ATP-dependent helicase Lhr and Lhr-like helicase   EC:3.6.4.-1   (GenBank) DNA ligase-associat</a> | DNA Repair and Replication          | 31.808   | 45.830   | 39.906   | 11.847   | 87.598   | 76.523   |
| <a href="#">AMK58_09025</a> | <a href="#">K06953 uncharacterized protein   (GenBank) phosphoesterase</a>                                            | phosphoesterase                     | 6.903    | 4.230    | 5.722    | 43.392   | 20.693   | 205.499  |
| <a href="#">AMK58_09030</a> | <a href="#">no KO assigned   (GenBank) Nex18 symbiotically induced protein</a>                                        | No COG                              | 63.385   | 76.921   | 87.340   | 859.021  | 570.812  | 445.176  |
| <a href="#">AMK58_09035</a> | <a href="#">K01669 deoxyribodipyrimidine photo-lyase   EC:4.1.99.31   (GenBank) deoxyribodipyrimidine photolyase</a>  | DNA Repair and Replication          | 3.571    | 5.954    | 7.738    | 117.690  | 57.032   | 41.504   |
| <a href="#">AMK58_09040</a> | <a href="#">K07093 uncharacterized protein   (GenBank) dTDP-glucose 4,6-dehydratase</a>                               | Metabolism: Carbohydrate            | 226.494  | 233.295  | 176.414  | 643.959  | 3110.271 | 1992.869 |

|                             |                                                                                                                                      |                                     |          |          |          |          |          |          |
|-----------------------------|--------------------------------------------------------------------------------------------------------------------------------------|-------------------------------------|----------|----------|----------|----------|----------|----------|
| <a href="#">AMK58_09045</a> | <a href="#">K09823 Fur family transcriptional regulator, zinc uptake regulator</a>   (GenBank) <a href="#">Fur family transcript</a> | Transcription                       | 75.702   | 87.031   | 104.220  | 662.499  | 429.217  | 400.584  |
| <a href="#">AMK58_09050</a> | <a href="#">no KO assigned</a>   (GenBank) <a href="#">ATP-binding protein</a>                                                       | No COG                              | 16.389   | 22.643   | 23.082   | 284.031  | 184.106  | 354.381  |
| <a href="#">AMK58_09055</a> | <a href="#">no KO assigned</a>   (GenBank) <a href="#">hypothetical protein</a>                                                      | Hypothetical                        | 8.102    | 8.677    | 8.285    | 37.680   | 14.262   | 32.178   |
| <a href="#">AMK58_09060</a> | <a href="#">K16649 rhamnopyranosyl-N-acetylglucosaminyl-diphospho-decaprenol beta-1,3/1,4-galactofuranosyltransf</a>                 | Biosynthesis: polysaccharides       | 173.576  | 147.232  | 196.732  | 199.822  | 152.954  | 241.209  |
| <a href="#">AMK58_09065</a> | <a href="#">no KO assigned</a>   (GenBank) <a href="#">transporter</a>                                                               | Transport                           | 26.223   | 31.450   | 35.592   | 217.031  | 158.775  | 253.194  |
| <a href="#">AMK58_09070</a> | <a href="#">no KO assigned</a>   (GenBank) <a href="#">MBL fold metallo-hydrolase</a>                                                | Hydrolase                           | 14.382   | 11.398   | 23.163   | 182.631  | 187.891  | 199.364  |
| <a href="#">AMK58_09075</a> | <a href="#">no KO assigned</a>   (GenBank) <a href="#">hypothetical protein</a>                                                      | Hypothetical                        | 107.105  | 123.651  | 119.055  | 996.681  | 644.407  | 898.637  |
| <a href="#">AMK58_09080</a> | <a href="#">no KO assigned</a>   (GenBank) <a href="#">chemotaxis protein</a>                                                        | Chemotaxis                          | 78.041   | 110.484  | 79.511   | 103.606  | 154.396  | 262.286  |
| <a href="#">AMK58_09085</a> | <a href="#">K03406 methyl-accepting chemotaxis protein</a>   (GenBank) <a href="#">chemotaxis protein</a>                            | Chemotaxis                          | 8.176    | 11.952   | 15.465   | 8.971    | 21.705   | 45.005   |
| <a href="#">AMK58_09090</a> | <a href="#">K13283 ferrous-iron efflux pump FieF</a>   (GenBank) <a href="#">fieF: ferrous iron transporter</a>                      | Transport: Metal                    | 61.702   | 93.511   | 106.141  | 122.333  | 144.090  | 227.058  |
| <a href="#">AMK58_09095</a> | <a href="#">K00275 pyridoxamine 5'-phosphate oxidase</a>   EC:1.4.3.51   (GenBank) <a href="#">pyridoxamine 5'-phosphate oxidase</a> | Metabolism: Co-Factors and Vitamins | 464.120  | 641.801  | 486.246  | 300.786  | 317.996  | 451.280  |
| <a href="#">AMK58_09100</a> | <a href="#">no KO assigned</a>   (GenBank) <a href="#">hypothetical protein</a>                                                      | Hypothetical                        | 181.081  | 187.184  | 167.377  | 226.918  | 188.023  | 342.964  |
| <a href="#">AMK58_09105</a> | <a href="#">no KO assigned</a>   (GenBank) <a href="#">molecular chaperone DnaJ</a>                                                  | Chaperone                           | 67.096   | 74.596   | 55.881   | 96.974   | 89.311   | 137.764  |
| <a href="#">AMK58_09110</a> | <a href="#">K03798 cell division protease FtsH</a>   EC:3.4.24.-   (GenBank) <a href="#">cell division protein FtsH</a>              | Cell Cycle/Shape/Homeostasis        | 67.061   | 56.948   | 51.164   | 30.246   | 79.103   | 52.781   |
| <a href="#">AMK58_09115</a> | <a href="#">no KO assigned</a>   (GenBank) <a href="#">ABC transporter</a>                                                           | Membrane Transport                  | 207.301  | 190.404  | 215.653  | 290.857  | 315.040  | 199.130  |
| <a href="#">AMK58_09120</a> | <a href="#">no KO assigned</a>   (GenBank) <a href="#">hypothetical protein</a>                                                      | Hypothetical                        | 18.219   | 16.993   | 20.027   | 219.646  | 77.854   | 104.072  |
| <a href="#">AMK58_09125</a> | <a href="#">no KO assigned</a>   (GenBank) <a href="#">two-component svstem response regulator</a>                                   | Signal Transduction                 | 211.550  | 205.544  | 204.761  | 228.655  | 159.333  | 225.460  |
| <a href="#">AMK58_09130</a> | <a href="#">no KO assigned</a>   (GenBank) <a href="#">histidine kinase</a>                                                          | Signal Transduction                 | 230.619  | 272.808  | 238.899  | 293.634  | 152.554  | 257.365  |
| <a href="#">AMK58_09135</a> | <a href="#">no KO assigned</a>   (GenBank) <a href="#">Fe-S oxidoreductase</a>                                                       | Oxidoreductase                      | 426.644  | 386.152  | 387.769  | 189.014  | 433.179  | 424.036  |
| <a href="#">AMK58_09140</a> | <a href="#">no KO assigned</a>   (GenBank) <a href="#">hypothetical protein</a>                                                      | Hypothetical                        | 162.968  | 186.081  | 170.176  | 262.671  | 241.368  | 374.842  |
| <a href="#">AMK58_09145</a> | <a href="#">no KO assigned</a>   (GenBank) <a href="#">histidine kinase</a>                                                          | Signal Transduction                 | 54.129   | 54.985   | 48.355   | 11.415   | 31.265   | 35.274   |
| <a href="#">AMK58_09150</a> | <a href="#">no KO assigned</a>   (GenBank) <a href="#">hypothetical protein</a>                                                      | Hypothetical                        | 188.909  | 177.774  | 151.649  | 40.776   | 74.582   | 144.724  |
| <a href="#">AMK58_09155</a> | <a href="#">no KO assigned</a>   (GenBank) <a href="#">hypothetical protein</a>                                                      | Hypothetical                        | 92.338   | 114.878  | 105.877  | 462.216  | 178.132  | 757.477  |
| <a href="#">AMK58_09160</a> | <a href="#">no KO assigned</a>   (GenBank) <a href="#">hypothetical protein</a>                                                      | Hypothetical                        | 192.426  | 262.433  | 256.739  | 583.332  | 262.412  | 313.445  |
| <a href="#">AMK58_09165</a> | <a href="#">no KO assigned</a>   (GenBank) <a href="#">hypothetical protein</a>                                                      | Hypothetical                        | 147.539  | 193.685  | 208.221  | 787.000  | 231.284  | 460.122  |
| <a href="#">AMK58_09170</a> | <a href="#">K11741 quaternary ammonium compound-resistance protein SugE</a>   (GenBank) <a href="#">molecular chaperone</a>          | Chaperone                           | 92.139   | 156.955  | 131.047  | 354.463  | 245.225  | 376.704  |
| <a href="#">AMK58_09175</a> | <a href="#">no KO assigned</a>   (GenBank) <a href="#">short-chain dehydrogenase</a>                                                 | dehydrogenase                       | 1.525    | 2.103    | 5.354    | 64.277   | 25.979   | 32.093   |
| <a href="#">AMK58_09180</a> | <a href="#">K07397 putative redox protein</a>   (GenBank) <a href="#">peroxyredoxin</a>                                              | No COG                              | 129.435  | 129.171  | 138.417  | 82.251   | 1333.065 | 109.329  |
| <a href="#">AMK58_09185</a> | <a href="#">no KO assigned</a>   (GenBank) <a href="#">hypothetical protein</a>                                                      | Hypothetical                        | 41.139   | 57.557   | 45.057   | 409.825  | 446.327  | 312.424  |
| <a href="#">AMK58_09190</a> | <a href="#">K00790 UDP-N-acetylglucosamine 1-carboxyvinyltransferase</a>   EC:2.5.1.71   (GenBank) <a href="#">UDP-N-acetylglu</a>   | Cell Wall                           | 43.448   | 53.147   | 35.613   | 39.386   | 113.148  | 60.520   |
| <a href="#">AMK58_09195</a> | <a href="#">no KO assigned</a>   (GenBank) <a href="#">GCN5 family acetyltransferase</a>                                             | Acetyltransferase                   | 122.722  | 124.660  | 122.167  | 146.004  | 441.609  | 271.382  |
| <a href="#">AMK58_09200</a> | <a href="#">no KO assigned</a>   (GenBank) <a href="#">hypothetical protein</a>                                                      | Hypothetical                        | 112.352  | 102.670  | 100.389  | 198.460  | 227.261  | 260.755  |
| <a href="#">AMK58_09205</a> | <a href="#">K01953 asparagine synthase (glutamine-hydrolysing)</a>   EC:6.3.5.4   (GenBank) <a href="#">asparagine synthase</a>      | Metabolism: Amino Acid              | 8.490    | 6.616    | 7.429    | 18.048   | 20.746   | 26.128   |
| <a href="#">AMK58_09210</a> | <a href="#">no KO assigned</a>   (GenBank) <a href="#">hypothetical protein</a>                                                      | Hypothetical                        | 90.360   | 93.887   | 115.798  | 519.569  | 200.326  | 469.943  |
| <a href="#">AMK58_09215</a> | <a href="#">K08679 UDP-glucuronate 4-epimerase</a>   EC:5.1.3.6   (GenBank) <a href="#">protein CapI</a>                             | Metabolism: Carbohydrate            | 145.807  | 147.759  | 131.966  | 353.216  | 191.416  | 267.553  |
| <a href="#">AMK58_09220</a> | <a href="#">no KO assigned</a>   (GenBank) <a href="#">glycosyl transferase family 1</a>                                             | Glycosyl Transferase                | 134.809  | 126.871  | 112.708  | 22.361   | 113.411  | 55.351   |
| <a href="#">AMK58_09225</a> | <a href="#">no KO assigned</a>   (GenBank) <a href="#">hypothetical protein</a>                                                      | Hypothetical                        | 99.566   | 90.961   | 96.392   | 143.572  | 71.035   | 242.467  |
| <a href="#">AMK58_09230</a> | <a href="#">no KO assigned</a>   (GenBank) <a href="#">NAD-dependent dehydratase</a>                                                 | Energy                              | 22.844   | 28.813   | 30.167   | 221.518  | 22.682   | 70.610   |
| <a href="#">AMK58_09235</a> | <a href="#">K13013 O-antigen biosynthesis protein WbaV</a>   (GenBank) <a href="#">nucleotide sugar dehydratase</a>                  | Biosynthesis: polysaccharide        | 29.083   | 25.400   | 25.309   | 95.661   | 11.151   | 70.447   |
| <a href="#">AMK58_09240</a> | <a href="#">K14234 (RNA-Thr)</a>   (GenBank) <a href="#">tRNA-Thr</a>                                                                | tRNA synthesis/modification         | 251.836  | 270.053  | 303.914  | 2543.075 | 270.372  | 1158.623 |
| <a href="#">AMK58_09245</a> | <a href="#">K03640 peptidoglycan-associated lipoprotein</a>   (GenBank) <a href="#">cell envelope biogenesis protein OmpA</a>        | Cell Wall                           | 462.216  | 401.864  | 436.583  | 776.588  | 301.859  | 775.061  |
| <a href="#">AMK58_09250</a> | <a href="#">K03641 TolB protein</a>   (GenBank) <a href="#">tolB: translocation protein TolB</a>                                     | Transport                           | 23.177   | 37.424   | 55.730   | 38.119   | 49.488   | 45.887   |
| <a href="#">AMK58_09255</a> | <a href="#">no KO assigned</a>   (GenBank) <a href="#">hypothetical protein</a>                                                      | Hypothetical                        | 2807.304 | 2491.766 | 2148.390 | 42.857   | 526.627  | 130.303  |
| <a href="#">AMK58_09260</a> | <a href="#">K03560 biopolymer transport protein TolR</a>   (GenBank) <a href="#">protein TolR</a>                                    | Transport: Biopolymer               | 440.682  | 329.479  | 382.300  | 352.242  | 171.596  | 469.301  |
| <a href="#">AMK58_09265</a> | <a href="#">K03562 biopolymer transport protein TolQ</a>   (GenBank) <a href="#">protein TolQ</a>                                    | Transport: Biopolymer               | 69.329   | 49.024   | 63.053   | 216.248  | 57.411   | 113.823  |
| <a href="#">AMK58_09270</a> | <a href="#">K07107 acyl-CoA thioester hydrolase</a>   EC:3.1.2.-   (GenBank) <a href="#">acyl-CoA thioester hydrolase</a>            | Hydrolases                          | 59.024   | 64.801   | 58.998   | 108.800  | 56.422   | 119.988  |
| <a href="#">AMK58_09275</a> | <a href="#">K03551 holliday junction DNA helicase RuvB</a>   EC:3.6.4.12   (GenBank) <a href="#">ATP-dependent DNA helicase F</a>    | DNA Repair and Replication          | 59.540   | 73.528   | 57.032   | 147.185  | 52.842   | 146.403  |
| <a href="#">AMK58_09280</a> | <a href="#">K03550 holliday junction DNA helicase RuvA</a>   EC:3.6.4.12   (GenBank) <a href="#">ATP-dependent DNA helicase F</a>    | DNA Repair and Replication          | 49.048   | 48.454   | 46.084   | 37.248   | 88.992   | 149.335  |
| <a href="#">AMK58_09285</a> | <a href="#">K01159 crossover junction endodeoxyribonuclease RuvC</a>   EC:3.1.22.4   (GenBank) <a href="#">crossover junction en</a> | DNA Repair and Replication          | 33.874   | 46.754   | 42.731   | 188.543  | 101.787  | 142.955  |
| <a href="#">AMK58_09290</a> | <a href="#">no KO assigned</a>   (GenBank) <a href="#">transcriptional regulator</a>                                                 | Transcription                       | 19.295   | 21.134   | 19.416   | 113.724  | 116.935  | 105.859  |
| <a href="#">AMK58_09295</a> | <a href="#">K09769 uncharacterized protein</a>   (GenBank) <a href="#">metallophosphoesterase</a>                                    | No COG                              | 108.408  | 102.959  | 119.040  | 193.360  | 399.008  | 273.572  |
| <a href="#">AMK58_09300</a> | <a href="#">K01934 5-formyltetrahydrofolate cyclo-ligase</a>   EC:6.3.3.2   (GenBank) <a href="#">5-formyltetrahydrofolate cyclo</a> | Metabolism: Co-Factors and Vitamins | 205.767  | 195.983  | 183.359  | 194.144  | 453.421  | 215.691  |
| <a href="#">AMK58_09305</a> | <a href="#">K09888 cell division protein ZapA</a>   (GenBank) <a href="#">hypothetical protein</a>                                   | Cell Cycle/Shape/Homeostasis        | 268.286  | 254.897  | 275.920  | 522.599  | 968.206  | 469.751  |
| <a href="#">AMK58_09310</a> | <a href="#">no KO assigned</a>   (GenBank) <a href="#">hypothetical protein</a>                                                      | Hypothetical                        | 156.590  | 160.746  | 162.701  | 571.615  | 970.193  | 383.713  |
| <a href="#">AMK58_09315</a> | <a href="#">K00615 transketolase</a>   EC:2.2.1.1   (GenBank) <a href="#">transketolase</a>                                          | Metabolism                          | 37.832   | 44.918   | 44.606   | 35.531   | 281.043  | 354.600  |
| <a href="#">AMK58_09320</a> | <a href="#">K00134 glyceraldehyde 3-phosphate dehydrogenase</a>   EC:1.2.1.12   (GenBank) <a href="#">gapA: glyceraldehyd-3-ph</a>   | Metabolism                          | 25.945   | 35.163   | 26.838   | 26.548   | 63.996   | 49.452   |
| <a href="#">AMK58_09325</a> | <a href="#">no KO assigned</a>   (GenBank) <a href="#">antitoxin HicB</a>                                                            | Defense                             | 66.679   | 60.804   | 72.742   | 104.363  | 136.488  | 148.066  |
| <a href="#">AMK58_09330</a> | <a href="#">no KO assigned</a>   (GenBank) <a href="#">hypothetical protein</a>                                                      | Hypothetical                        | 1518.889 | 1249.580 | 1463.359 | 831.751  | 650.121  | 830.897  |
| <a href="#">AMK58_09335</a> | <a href="#">no KO assigned</a>   (GenBank) <a href="#">hypothetical protein</a>                                                      | Hypothetical                        | 2716.800 | 2408.245 | 2610.766 | 212.951  | 622.377  | 365.105  |
| <a href="#">AMK58_09340</a> | <a href="#">K11645 fructose-bisphosphate aldolase, class I</a>   EC:4.1.2.13   (GenBank) <a href="#">fructose-bisphosphate aldol</a> | Metabolism                          | 29.943   | 42.001   | 30.822   | 27.903   | 147.654  | 67.603   |
| <a href="#">AMK58_09345</a> | <a href="#">K00788 thiamine-phosphate pyrophosphorylase</a>   EC:2.5.1.3   (GenBank) <a href="#">thiamine-phosphate synthase</a>     | Metabolism: Co-Factors and Vitamins | 12.316   | 5.660    | 10.269   | 107.109  | 32.799   | 70.103   |
| <a href="#">AMK58_09350</a> | <a href="#">K07090 uncharacterized protein</a>   (GenBank) <a href="#">hypothetical protein</a>                                      | Hypothetical                        | 108.022  | 128.178  | 150.496  | 95.463   | 30.355   | 58.987   |
| <a href="#">AMK58_09355</a> | <a href="#">K06076 long-chain fatty acid transport protein</a>   (GenBank) <a href="#">long-chain fatty acid transporter</a>         | Transport: Lipid                    | 275.587  | 288.376  | 276.046  | 137.142  | 166.403  | 157.694  |
| <a href="#">AMK58_09360</a> | <a href="#">K19745 acrylyl-CoA reductase (NADPH)</a>   EC:1.3.1.-   (GenBank) <a href="#">NADPH quinone dehydrogenase</a>            | Energy                              | 89.834   | 108.939  | 106.104  | 131.410  | 62.581   | 127.600  |
| <a href="#">AMK58_09365</a> | <a href="#">K04568 elongation factor P--(R)-beta-lysine ligase</a>   EC:6.3.1.-   (GenBank) <a href="#">elongation factor P--(R)</a> | Translation                         | 24.836   | 24.043   | 30.720   | 182.517  | 41.099   | 177.734  |
| <a href="#">AMK58_09370</a> | <a href="#">K02356 elongation factor P</a>   (GenBank) <a href="#">elongation factor P</a>                                           | translation                         | 2181.695 | 1719.724 | 1962.504 | 650.174  | 412.120  | 588.475  |
| <a href="#">AMK58_09375</a> | <a href="#">K01092 mvo-inositol-1(or 4)-monophosphatase</a>   EC:3.1.3.25   (GenBank) <a href="#">inositol monophosphatase</a>       | Metabolism                          | 572.521  | 581.223  | 577.884  | 191.588  | 269.640  | 177.005  |

|                             |                                                                                                                       |                                |           |           |           |          |           |          |
|-----------------------------|-----------------------------------------------------------------------------------------------------------------------|--------------------------------|-----------|-----------|-----------|----------|-----------|----------|
| <a href="#">AMK58_09380</a> | <a href="#">no KO assigned   (GenBank) hypothetical protein.</a>                                                      | Hypothetical                   | 58.660    | 69.158    | 98.163    | 315.361  | 225.943   | 244.121  |
| <a href="#">AMK58_09385</a> | <a href="#">no KO assigned   (GenBank) flagellar motor protein MotA.</a>                                              | Motility                       | 477.980   | 395.166   | 373.846   | 42.731   | 374.829   | 114.065  |
| <a href="#">AMK58_09390</a> | <a href="#">K02557 chemotaxis protein MotB   (GenBank) chemotaxis protein.</a>                                        | Chemotaxis                     | 74.021    | 61.924    | 68.374    | 121.025  | 98.564    | 124.857  |
| <a href="#">AMK58_09395</a> | <a href="#">K00283 glycine dehydrogenase subunit 2 [EC:1.4.4.21]   (GenBank) glycine dehydrogenase.</a>               | Metabolism                     | 18.942    | 18.015    | 20.069    | 72.290   | 28.592    | 62.813   |
| <a href="#">AMK58_09400</a> | <a href="#">K00282 glycine dehydrogenase subunit 1 [EC:1.4.4.21]   (GenBank) glycine dehydrogenase.</a>               | Metabolism                     | 117.824   | 106.804   | 116.750   | 108.487  | 92.353    | 148.270  |
| <a href="#">AMK58_09405</a> | <a href="#">K02437 glycine cleavage system H protein   (GenBank) glycine cleavage system protein H.</a>               | Metabolism                     | 399.385   | 380.003   | 416.577   | 652.636  | 303.397   | 708.646  |
| <a href="#">AMK58_09410</a> | <a href="#">K00605 aminomethyltransferase [EC:2.1.2.101]   (GenBank) gcvT: glycine cleavage system protein T.</a>     | Metabolism                     | 1944.267  | 1630.637  | 1681.274  | 222.951  | 160.182   | 168.657  |
| <a href="#">AMK58_09415</a> | <a href="#">no KO assigned   (GenBank) glutamate synthase.</a>                                                        | enzyme                         | 12260.052 | 10670.965 | 11291.951 | 1127.390 | 985.293   | 1012.709 |
| <a href="#">AMK58_09420</a> | <a href="#">no KO assigned   (GenBank) hypothetical protein.</a>                                                      | Hypothetical                   | 1740.553  | 1657.075  | 1667.658  | 80.541   | 134.010   | 101.959  |
| <a href="#">AMK58_09425</a> | <a href="#">K03527 4-hydroxy-3-methylbut-2-en-1-yl diphosphate reductase [EC:1.17.7.41]   (GenBank) ispH: 4-hydro</a> | Biosynthesis: Terpenoids       | 2379.899  | 2007.349  | 1832.486  | 178.603  | 321.169   | 202.499  |
| <a href="#">AMK58_09430</a> | <a href="#">K02204 homoserine kinase type II [EC:2.7.1.39]   (GenBank) homoserine kinase.</a>                         | Signal Transduction            | 50.448    | 55.134    | 40.245    | 63.787   | 18.256    | 55.793   |
| <a href="#">AMK58_09435</a> | <a href="#">K03469 ribonuclease HI [EC:3.1.26.41]   (GenBank) ribonuclease H.</a>                                     | Genetic Information Processing | 232.123   | 257.592   | 224.994   | 143.382  | 71.005    | 260.568  |
| <a href="#">AMK58_09440</a> | <a href="#">K02182 crotonobetaine/carnitine-CoA ligase [EC:6.2.1.-1]   (GenBank) hypothetical protein.</a>            | Enzyme                         | 45.431    | 47.048    | 57.379    | 129.120  | 102.985   | 158.821  |
| <a href="#">AMK58_09445</a> | <a href="#">no KO assigned   (GenBank) alkyl hydroperoxide reductase.</a>                                             | defense                        | 109.544   | 142.275   | 95.575    | 517.114  | 149.054   | 393.990  |
| <a href="#">AMK58_09450</a> | <a href="#">K08344 suppressor for copper-sensitivity B   (GenBank) copper resistance protein.</a>                     | Transport: Metal               | 6.446     | 6.245     | 5.577     | 33.215   | 9.203     | 31.500   |
| <a href="#">AMK58_09455</a> | <a href="#">K07735 putative transcriptional regulator   (GenBank) hypothetical protein.</a>                           | Transcription                  | 319.293   | 317.724   | 357.548   | 379.560  | 194.689   | 307.767  |
| <a href="#">AMK58_09460</a> | <a href="#">no KO assigned   (GenBank) hypothetical protein.</a>                                                      | Hypothetical                   | 1677.821  | 1623.139  | 1660.333  | 275.584  | 520.584   | 348.219  |
| <a href="#">AMK58_09465</a> | <a href="#">K03790 ribosomal-protein-alanine N-acetyltransferase [EC:2.3.1.128]   (GenBank) GCN5 family acetyltr.</a> | Ribosome                       | 404.197   | 375.753   | 421.324   | 784.584  | 425.781   | 373.662  |
| <a href="#">AMK58_09470</a> | <a href="#">no KO assigned   (GenBank) peptidase M16.</a>                                                             | peptidase                      | 167.309   | 176.091   | 162.467   | 45.288   | 269.480   | 110.483  |
| <a href="#">AMK58_09475</a> | <a href="#">K01733 threonine synthase [EC:4.2.3.11]   (GenBank) threonine synthase.</a>                               | Metabolism: Amino Acid         | 23.649    | 22.525    | 23.301    | 11.937   | 44.883    | 45.845   |
| <a href="#">AMK58_09480</a> | <a href="#">K01179 endoglucanase [EC:3.2.1.41]   (GenBank) 1,4-beta-glucanase.</a>                                    | Metabolism: Carbohydrate       | 17.674    | 15.240    | 14.033    | 106.049  | 64.309    | 61.077   |
| <a href="#">AMK58_09485</a> | <a href="#">K01299 carboxypeptidase Taq [EC:3.4.17.19]   (GenBank) peptidase M32.</a>                                 | Peptidase                      | 103.929   | 91.809    | 84.205    | 147.668  | 157.275   | 111.745  |
| <a href="#">AMK58_09490</a> | <a href="#">K14998 surflet locus 1 family protein   (GenBank) hypothetical protein.</a>                               | No COG                         | 296.396   | 262.595   | 258.202   | 357.641  | 183.294   | 295.901  |
| <a href="#">AMK58_09495</a> | <a href="#">no KO assigned   (GenBank) hypothetical protein.</a>                                                      | Hypothetical                   | 34.224    | 46.295    | 42.364    | 500.397  | 223.556   | 830.796  |
| <a href="#">AMK58_09500</a> | <a href="#">K02276 cytochrome c oxidase subunit III [EC:1.9.3.11]   (GenBank) cytochrome B562.</a>                    | Energy                         | 146.139   | 180.204   | 198.597   | 398.162  | 108.079   | 205.631  |
| <a href="#">AMK58_09505</a> | <a href="#">K02258 cytochrome c oxidase assembly protein subunit I   (GenBank) cytochrome C oxidase assembly p</a>    | Energy                         | 58.791    | 95.056    | 87.631    | 234.962  | 42.665    | 106.152  |
| <a href="#">AMK58_09510</a> | <a href="#">K02301 protoheme IX farnesyltransferase [EC:2.5.1.-1]   (GenBank) protoheme IX farnesyltransferase.</a>   | Energy                         | 92.694    | 84.003    | 98.532    | 80.221   | 31.023    | 90.661   |
| <a href="#">AMK58_09515</a> | <a href="#">K02274 cytochrome c oxidase subunit I [EC:1.9.3.11]   (GenBank) cytochrome C oxidase subunit I.</a>       | Energy                         | 1051.490  | 990.916   | 1112.460  | 63.608   | 307.179   | 151.988  |
| <a href="#">AMK58_09520</a> | <a href="#">K02275 cytochrome c oxidase subunit II [EC:1.9.3.11]   (GenBank) cytochrome C oxidase subunit II.</a>     | Energy                         | 1064.221  | 1094.695  | 993.152   | 188.558  | 353.747   | 194.288  |
| <a href="#">AMK58_09525</a> | <a href="#">no KO assigned   (GenBank) hypothetical protein.</a>                                                      | Hypothetical                   | 1272.824  | 1325.071  | 1475.897  | 122.670  | 362.305   | 110.172  |
| <a href="#">AMK58_09530</a> | <a href="#">K03568 TldD protein   (GenBank) tldD: protease TldD.</a>                                                  | Peptidase                      | 5281.698  | 4690.209  | 4995.632  | 85.165   | 1285.957  | 238.867  |
| <a href="#">AMK58_09535</a> | <a href="#">K03567 glycine cleavage system transcriptional repressor   (GenBank) amino acid-binding protein.</a>      | Transcription                  | 7109.281  | 7520.142  | 7643.459  | 209.760  | 2513.965  | 455.280  |
| <a href="#">AMK58_09540</a> | <a href="#">no KO assigned   (GenBank) hypothetical protein.</a>                                                      | Hypothetical                   | 32.660    | 24.391    | 39.427    | 110.624  | 33.696    | 120.598  |
| <a href="#">AMK58_09545</a> | <a href="#">no KO assigned   (GenBank) hypothetical protein.</a>                                                      | Hypothetical                   | 701.510   | 661.939   | 791.895   | 298.106  | 1299.733  | 343.870  |
| <a href="#">AMK58_09550</a> | <a href="#">no KO assigned   (GenBank) hypothetical protein.</a>                                                      | Hypothetical                   | 887.882   | 857.310   | 1065.916  | 611.844  | 1886.583  | 798.956  |
| <a href="#">AMK58_09555</a> | <a href="#">K03088 RNA polymerase sigma-70 factor: ECF subfamily   (GenBank) RNA polymerase subunit sigma-7</a>       | Transcription                  | 48.152    | 51.549    | 77.805    | 1106.220 | 1016.788  | 613.999  |
| <a href="#">AMK58_09560</a> | <a href="#">no KO assigned   (GenBank) lytic transglycosylase.</a>                                                    | transglycosylase               | 8.752     | 9.441     | 16.066    | 139.063  | 874.631   | 128.727  |
| <a href="#">AMK58_09565</a> | <a href="#">no KO assigned   (GenBank) hypothetical protein.</a>                                                      | Hypothetical                   | 15.952    | 10.483    | 32.761    | 114.748  | 1277.017  | 203.535  |
| <a href="#">AMK58_09570</a> | <a href="#">K14224 tRNA Glu   (GenBank) tRNA-Glu.</a>                                                                 | tRNA synthesis/modification    | 135.413   | 152.285   | 331.724   | 1303.889 | 11718.340 | 1756.429 |
| <a href="#">AMK58_09575</a> | <a href="#">K14224 tRNA Glu   (GenBank) tRNA-Glu.</a>                                                                 | tRNA synthesis/modification    | 218.253   | 218.910   | 657.390   | 2428.520 | 1332.281  | 2031.195 |
| <a href="#">AMK58_09580</a> | <a href="#">K01620 threonine aldolase [EC:4.1.2.48]   (GenBank) threonine aldolase.</a>                               | Metabolism: Amino Acid         | 68.325    | 69.958    | 71.990    | 77.362   | 278.192   | 182.583  |
| <a href="#">AMK58_09585</a> | <a href="#">no KO assigned   (GenBank) hypothetical protein.</a>                                                      | Hypothetical                   | 822.716   | 732.204   | 985.728   | 22.815   | 1171.151  | 156.560  |
| <a href="#">AMK58_09590</a> | <a href="#">K06180 23S rRNA pseudouridine191/1915/1917 synthase [EC:5.4.99.231]   (GenBank) RNA pseudourid</a>        | Ribosome                       | 137.862   | 112.659   | 161.473   | 6.623    | 182.492   | 160.994  |
| <a href="#">AMK58_09595</a> | <a href="#">K03089 RNA polymerase sigma-32 factor   (GenBank) RNA polymerase subunit sigma-70.</a>                    | Transcription                  | 35.980    | 37.598    | 46.048    | 282.038  | 62.126    | 131.425  |
| <a href="#">AMK58_09600</a> | <a href="#">no KO assigned   (GenBank) hypothetical protein.</a>                                                      | Hypothetical                   | 30.269    | 27.400    | 23.329    | 44.540   | 25.260    | 20.413   |
| <a href="#">AMK58_09605</a> | <a href="#">no KO assigned   (GenBank) serine/threonine protein kinase.</a>                                           | Signal Transduction            | 25.433    | 38.879    | 36.046    | 109.963  | 42.680    | 98.208   |
| <a href="#">AMK58_09610</a> | <a href="#">K01939 adenylosuccinate synthase [EC:6.3.4.41]   (GenBank) adenylosuccinate synthetase.</a>               | Metabolism                     | 138.866   | 153.846   | 164.799   | 74.633   | 572.791   | 208.042  |
| <a href="#">AMK58_09615</a> | <a href="#">K02502 ATP phosphoribosyltransferase regulator subunit   (GenBank) ATP phosphoribosyltransferase r</a>    | Metabolism: Amino Acid         | 40.358    | 44.122    | 40.252    | 99.624   | 107.214   | 125.869  |
| <a href="#">AMK58_09620</a> | <a href="#">no KO assigned   (GenBank) hypothetical protein.</a>                                                      | Hypothetical                   | 36.535    | 38.494    | 38.575    | 229.906  | 106.885   | 225.524  |
| <a href="#">AMK58_09625</a> | <a href="#">K03498 trk system potassium uptake protein   (GenBank) potassium transporter TrkH.</a>                    | Transport: Inorganic           | 265.460   | 252.551   | 267.040   | 189.100  | 204.726   | 165.985  |
| <a href="#">AMK58_09630</a> | <a href="#">K00831 phosphoserine aminotransferase [EC:2.6.1.52]   (GenBank) phosphoserine aminotransferase.</a>       | Metabolism: Amino Acid         | 48.180    | 51.713    | 55.824    | 183.140  | 90.260    | 85.580   |
| <a href="#">AMK58_09635</a> | <a href="#">no KO assigned   (GenBank) hypothetical protein.</a>                                                      | Hypothetical                   | 66.447    | 69.982    | 59.635    | 294.417  | 52.307    | 247.053  |
| <a href="#">AMK58_09640</a> | <a href="#">no KO assigned   (GenBank) hypothetical protein.</a>                                                      | Hypothetical                   | 30.358    | 30.584    | 29.544    | 201.417  | 48.576    | 248.053  |
| <a href="#">AMK58_09645</a> | <a href="#">K07058 membrane protein   (GenBank) hypothetical protein.</a>                                             | Membrane                       | 191.005   | 209.435   | 206.308   | 206.134  | 113.158   | 164.696  |
| <a href="#">AMK58_09650</a> | <a href="#">K00208 enoyl-acyl-carrier protein   reductase [EC:1.3.1.9.1.3.1.10]   (GenBank) enoyl-ACP reductas</a>    | Metabolism: Lipid              | 16.257    | 11.928    | 20.610    | 307.561  | 75.500    | 247.549  |
| <a href="#">AMK58_09655</a> | <a href="#">no KO assigned   (GenBank) hypothetical protein.</a>                                                      | Hypothetical                   | 56.273    | 61.523    | 49.944    | 88.617   | 103.005   | 215.087  |
| <a href="#">AMK58_09660</a> | <a href="#">K01736 chorismate synthase [EC:4.2.3.51]   (GenBank) chorismate synthase.</a>                             | Biosynthesis: Amino Acid       | 157.723   | 166.567   | 171.770   | 185.979  | 334.989   | 204.003  |
| <a href="#">AMK58_09665</a> | <a href="#">no KO assigned   (GenBank) hypothetical protein.</a>                                                      | Hypothetical                   | 359.613   | 393.404   | 373.228   | 283.398  | 541.030   | 380.141  |
| <a href="#">AMK58_09670</a> | <a href="#">no KO assigned   (GenBank) regulator.</a>                                                                 | signal transduction            | 89.783    | 93.805    | 73.487    | 88.869   | 66.244    | 276.932  |
| <a href="#">AMK58_09675</a> | <a href="#">no KO assigned   (GenBank) alkyl hydroperoxidase.</a>                                                     | enzyme                         | 75.223    | 85.843    | 82.170    | 325.504  | 106.404   | 319.567  |
| <a href="#">AMK58_09680</a> | <a href="#">K04773 protease IV [EC:3.4.21.-1]   (GenBank) signal peptide peptidase SppA.</a>                          | Peptidases                     | 9.744     | 7.019     | 8.082     | 44.620   | 27.110    | 50.111   |
| <a href="#">AMK58_09685</a> | <a href="#">no KO assigned   (GenBank) hypothetical protein.</a>                                                      | Hypothetical                   | 115.661   | 111.738   | 143.665   | 1039.044 | 328.062   | 863.472  |
| <a href="#">AMK58_09690</a> | <a href="#">K13924 two-component system_chemotaxis family_CheB/CheR fusion protein [EC:2.1.1.80.3.1.1.61]   (G</a>    | Chemotaxis                     | 68.124    | 73.807    | 68.777    | 20.273   | 31.032    | 41.806   |
| <a href="#">AMK58_09695</a> | <a href="#">K20975 two-component system_sensor histidine kinase [EC:2.7.13.31]   (GenBank) histidine kinase.</a>      | Signal Transduction            | 89.511    | 95.709    | 95.729    | 126.145  | 60.860    | 86.968   |
| <a href="#">AMK58_09700</a> | <a href="#">no KO assigned   (GenBank) hypothetical protein.</a>                                                      | Hypothetical                   | 193.265   | 254.703   | 232.940   | 215.486  | 258.769   | 485.448  |
| <a href="#">AMK58_09705</a> | <a href="#">K02069 putative ABC transport system permease protein   (GenBank) ABC transporter permease.</a>           | Membrane Transport             | 248.625   | 221.325   | 225.083   | 371.777  | 403.371   | 806.275  |
| <a href="#">AMK58_09710</a> | <a href="#">no KO assigned   (GenBank) ATP-binding protein.</a>                                                       | No COG                         | 214.698   | 242.342   | 269.000   | 808.734  | 660.662   | 624.607  |



|                             |                                                                                                                          |                              |          |          |          |          |          |          |
|-----------------------------|--------------------------------------------------------------------------------------------------------------------------|------------------------------|----------|----------|----------|----------|----------|----------|
| <a href="#">AMK58_09715</a> | <a href="#">no KO assigned   (GenBank) transporter</a>                                                                   | Transport                    | 14.761   | 15.949   | 14.110   | 21.772   | 89.758   | 45.141   |
| <a href="#">AMK58_09720</a> | <a href="#">no KO assigned   (GenBank) hypothetical protein</a>                                                          | Hypothetical                 | 8.385    | 8.015    | 12.968   | 136.278  | 33.803   | 60.230   |
| <a href="#">AMK58_09725</a> | <a href="#">no KO assigned   (GenBank) histidine kinase</a>                                                              | Signal Transduction          | 8.228    | 9.831    | 11.199   | 109.632  | 19.956   | 44.892   |
| <a href="#">AMK58_09730</a> | <a href="#">no KO assigned   (GenBank) XRE family transcriptional regulator</a>                                          | Transcription                | 145.004  | 134.429  | 154.680  | 462.876  | 145.126  | 388.473  |
| <a href="#">AMK58_09735</a> | <a href="#">K04771 serine protease Do [EC:3.4.21.1071]   (GenBank) serine protease</a>                                   | Defense                      | 8.087    | 8.362    | 11.904   | 130.103  | 68.353   | 150.126  |
| <a href="#">AMK58_09740</a> | <a href="#">no KO assigned   (GenBank) hypothetical protein</a>                                                          | Hypothetical                 | 100.367  | 108.566  | 131.794  | 571.189  | 255.086  | 449.471  |
| <a href="#">AMK58_09745</a> | <a href="#">K02355 elongation factor G   (GenBank) fusA elongation factor G</a>                                          | Translation factors          | 53.228   | 56.992   | 56.728   | 58.901   | 68.713   | 54.695   |
| <a href="#">AMK58_09750</a> | <a href="#">no KO assigned   (GenBank) hypothetical protein</a>                                                          | Hypothetical                 | 20.179   | 33.258   | 38.042   | 1121.320 | 1721.110 | 1085.919 |
| <a href="#">AMK58_09755</a> | <a href="#">K04775 protease YdgD [EC:3.4.21.-]   (GenBank) hypothetical protein</a>                                      | Hydrolase                    | 61.261   | 87.417   | 88.365   | 171.017  | 100.669  | 168.628  |
| <a href="#">AMK58_09760</a> | <a href="#">K03169 DNA topoisomerase III [EC:5.99.1.21]   (GenBank) DNA topoisomerase III</a>                            | DNA Repair and Replication   | 1928.843 | 1497.592 | 1531.670 | 73.681   | 1294.715 | 240.334  |
| <a href="#">AMK58_09765</a> | <a href="#">no KO assigned   (GenBank) hypothetical protein</a>                                                          | Hypothetical                 | 1053.889 | 998.231  | 849.322  | 71.722   | 559.192  | 225.038  |
| <a href="#">AMK58_09770</a> | <a href="#">no KO assigned   (GenBank) hypothetical protein</a>                                                          | Hypothetical                 | 21.041   | 22.669   | 35.093   | 314.206  | 46.140   | 194.153  |
| <a href="#">AMK58_09775</a> | <a href="#">no KO assigned   (GenBank) hypothetical protein</a>                                                          | Hypothetical                 | 132.269  | 161.919  | 158.954  | 400.729  | 318.710  | 507.809  |
| <a href="#">AMK58_09780</a> | <a href="#">no KO assigned   (GenBank) glycosyl transferase</a>                                                          | Glycosyl Transferase         | 0.320    | 0.546    | 1.172    | 34.675   | 5.748    | 47.668   |
| <a href="#">AMK58_09785</a> | <a href="#">no KO assigned   (GenBank) hypothetical protein</a>                                                          | Hypothetical                 | 3.669    | 8.220    | 3.052    | 289.969  | 72.686   | 198.598  |
| <a href="#">AMK58_09790</a> | <a href="#">K10773 endonuclease III [EC:4.2.99.181]   (GenBank) Fe-S cluster assembly protein HesB</a>                   | DNA Repair and Replication   | 0.619    | 3.695    | 4.852    | 318.779  | 25.724   | 73.413   |
| <a href="#">AMK58_09795</a> | <a href="#">no KO assigned   (GenBank) hypothetical protein</a>                                                          | Hypothetical                 | 88.340   | 70.996   | 138.782  | 812.731  | 372.492  | 719.773  |
| <a href="#">AMK58_09800</a> | <a href="#">no KO assigned   (GenBank) RNA helicase</a>                                                                  | No COG                       | 0.571    | 0.853    | 0.780    | 31.883   | 22.542   | 18.960   |
| <a href="#">AMK58_09805</a> | <a href="#">no KO assigned   (GenBank) hypothetical protein</a>                                                          | Hypothetical                 | 11.478   | 13.273   | 18.482   | 276.262  | 393.713  | 196.043  |
| <a href="#">AMK58_09810</a> | <a href="#">no KO assigned   (GenBank) hypothetical protein</a>                                                          | Hypothetical                 | 10.857   | 8.460    | 14.811   | 90.103   | 102.402  | 43.770   |
| <a href="#">AMK58_09815</a> | <a href="#">K14219 tRNA Arg   (GenBank) tRNA-Arg</a>                                                                     | tRNA synthesis/modification  | 479.582  | 507.288  | 653.337  | 6902.378 | 2310.049 | 7144.434 |
| <a href="#">AMK58_09820</a> | <a href="#">K00619 amino-acid N-acetyltransferase [EC:2.3.1.11]   (GenBank) hypothetical protein</a>                     | Biosynthesis: Amino Acid     | 201.287  | 226.049  | 230.957  | 138.534  | 145.166  | 222.434  |
| <a href="#">AMK58_09825</a> | <a href="#">K14230 tRNA Met   (GenBank) tRNA-Met</a>                                                                     | tRNA synthesis/modification  | 1113.569 | 1189.730 | 1201.175 | 1553.570 | 891.769  | 1756.429 |
| <a href="#">AMK58_09830</a> | <a href="#">K03086 RNA polymerase primary sigma factor   (GenBank) RNA polymerase subunit sigma</a>                      | Transcription                | 2.839    | 3.687    | 4.577    | 5.786    | 14.428   | 17.453   |
| <a href="#">AMK58_09835</a> | <a href="#">K02316 DNA primase [EC:2.7.7.-]   (GenBank) DNA primase</a>                                                  | DNA Repair and Replication   | 8.510    | 8.598    | 10.352   | 43.333   | 30.243   | 30.751   |
| <a href="#">AMK58_09840</a> | <a href="#">K09117 uncharacterized protein   (GenBank) glutamyl-tRNA amidotransferase</a>                                | tRNA synthesis/modification  | 2.097    | 4.697    | 1.246    | 8.074    | 20.031   | 31.591   |
| <a href="#">AMK58_09845</a> | <a href="#">K01956 carbamoyl-phosphate synthase small subunit [EC:6.3.5.5]   (GenBank) carbamoyl phosphate synth</a>     | Metabolism                   | 1046.638 | 1185.909 | 1093.826 | 134.879  | 6059.966 | 424.544  |
| <a href="#">AMK58_09850</a> | <a href="#">no KO assigned   (GenBank) hypothetical protein</a>                                                          | Hypothetical                 | 107.027  | 164.302  | 117.156  | 116.895  | 708.971  | 107.044  |
| <a href="#">AMK58_09855</a> | <a href="#">no KO assigned   (GenBank) restriction endonuclease</a>                                                      | DNA Repair and Replication   | 287.034  | 324.496  | 264.307  | 116.208  | 1220.175 | 291.342  |
| <a href="#">AMK58_09860</a> | <a href="#">no KO assigned   (GenBank) hypothetical protein</a>                                                          | Hypothetical                 | 836.924  | 752.582  | 789.553  | 520.415  | 3495.350 | 470.814  |
| <a href="#">AMK58_09865</a> | <a href="#">K00058 D-3-phosphoglycerate dehydrogenase [EC:1.1.1.95]   (GenBank) D-3-phosphoglycerate dehydrog</a>        | Metabolism                   | 84.888   | 89.840   | 121.022  | 486.428  | 208.938  | 375.312  |
| <a href="#">AMK58_09870</a> | <a href="#">K00537 arsenate reductase [EC:1.20.4.11]   (GenBank) arsenate reductase</a>                                  | enzyme                       | 18.055   | 21.151   | 18.513   | 168.825  | 301.633  | 153.304  |
| <a href="#">AMK58_09875</a> | <a href="#">K07320 ribosomal protein L3 glutamine methyltransferase [EC:2.1.1.298]   (GenBank) protein-(glutamin</a>     | Ribosome                     | 44.343   | 51.449   | 52.793   | 220.036  | 285.004  | 152.553  |
| <a href="#">AMK58_09880</a> | <a href="#">no KO assigned   (GenBank) GCN5 family acetyltransferase</a>                                                 | Acetyltransferase            | 638.357  | 580.153  | 549.104  | 159.442  | 338.736  | 410.136  |
| <a href="#">AMK58_09885</a> | <a href="#">no KO assigned   (GenBank) hypothetical protein</a>                                                          | Hypothetical                 | 92.503   | 98.154   | 82.519   | 231.557  | 94.342   | 308.328  |
| <a href="#">AMK58_09890</a> | <a href="#">K17103 CDP-diacetylglucosyl--serine O-phosphatidyltransferase [EC:2.7.8.81]   (GenBank) CDP-diacetylgluc</a> | Metabolism                   | 170.624  | 155.971  | 166.916  | 169.501  | 164.839  | 233.308  |
| <a href="#">AMK58_09895</a> | <a href="#">K01613 phosphatidylserine decarboxylase [EC:4.1.1.651]   (GenBank) phosphatidylserine decarboxylase</a>      | Metabolism: Lipid            | 74.654   | 99.345   | 88.933   | 165.434  | 188.467  | 198.680  |
| <a href="#">AMK58_09900</a> | <a href="#">no KO assigned   (GenBank) hypothetical protein</a>                                                          | Hypothetical                 | 140.603  | 183.561  | 152.749  | 149.281  | 520.081  | 201.603  |
| <a href="#">AMK58_09905</a> | <a href="#">no KO assigned   (GenBank) peptidoglycan-binding protein</a>                                                 | Cell Wall                    | 123.098  | 137.686  | 121.746  | 187.636  | 410.807  | 172.418  |
| <a href="#">AMK58_09910</a> | <a href="#">no KO assigned   (GenBank) hypothetical protein</a>                                                          | Hypothetical                 | 890.034  | 829.448  | 761.320  | 616.306  | 1180.684 | 847.761  |
| <a href="#">AMK58_09915</a> | <a href="#">K06966 uncharacterized protein   (GenBank) lysine decarboxylase</a>                                          | No COG                       | 32.908   | 32.149   | 41.522   | 161.909  | 92.357   | 220.317  |
| <a href="#">AMK58_09920</a> | <a href="#">K00031 isocitrate dehydrogenase [EC:1.1.1.42]   (GenBank) isocitrate dehydrogenase</a>                       | Metabolism                   | 85.687   | 113.433  | 126.272  | 121.307  | 122.685  | 84.894   |
| <a href="#">AMK58_09925</a> | <a href="#">no KO assigned   (GenBank) oxidoreductase</a>                                                                | Oxidoreductase               | 14.300   | 13.290   | 19.338   | 113.322  | 75.726   | 180.633  |
| <a href="#">AMK58_09930</a> | <a href="#">no KO assigned   (GenBank) hypothetical protein</a>                                                          | Hypothetical                 | 76.939   | 95.022   | 88.466   | 196.274  | 81.790   | 191.172  |
| <a href="#">AMK58_09935</a> | <a href="#">K13583 GcrA cell cycle regulator   (GenBank) global cell cycle regulator GcrA-like protein</a>               | Cell Cycle/Shape/Homeostasis | 7631.810 | 6860.575 | 6429.273 | 230.186  | 3000.784 | 730.338  |
| <a href="#">AMK58_09940</a> | <a href="#">no KO assigned   (GenBank) transcriptional regulator</a>                                                     | Transcription                | 33.020   | 40.186   | 28.780   | 131.878  | 56.705   | 111.844  |
| <a href="#">AMK58_09945</a> | <a href="#">K03088 RNA polymerase sigma-70 factor. ECF subfamily   (GenBank) RNA polymerase subunit sigma-7</a>          | Transcription                | 149.902  | 144.958  | 159.887  | 317.292  | 459.585  | 231.222  |
| <a href="#">AMK58_09950</a> | <a href="#">K00031 isocitrate dehydrogenase [EC:1.1.1.42]   (GenBank) isocitrate dehydrogenase</a>                       | Metabolism                   | 234.363  | 285.140  | 279.438  | 52.043   | 83.011   | 84.785   |
| <a href="#">AMK58_09955</a> | <a href="#">no KO assigned   (GenBank) hypothetical protein</a>                                                          | Hypothetical                 | 21.440   | 36.168   | 28.780   | 183.135  | 125.603  | 251.671  |
| <a href="#">AMK58_09960</a> | <a href="#">no KO assigned   (GenBank) antibiotic biosynthesis monooxygenase</a>                                         | Defense                      | 11.531   | 25.834   | 19.872   | 543.516  | 78.578   | 195.804  |
| <a href="#">AMK58_09965</a> | <a href="#">no KO assigned   (GenBank) hypothetical protein</a>                                                          | Hypothetical                 | 60.623   | 70.797   | 75.603   | 409.261  | 212.344  | 379.328  |
| <a href="#">AMK58_09970</a> | <a href="#">K03406 methyl-accepting chemotaxis protein   (GenBank) chemotaxis protein</a>                                | Chemotaxis                   | 20.465   | 28.216   | 23.949   | 26.456   | 48.099   | 55.405   |
| <a href="#">AMK58_09975</a> | <a href="#">K09989 uncharacterized protein   (GenBank) hypothetical protein</a>                                          | Hypothetical                 | 53.845   | 56.342   | 71.636   | 30.019   | 95.174   | 64.973   |
| <a href="#">AMK58_09980</a> | <a href="#">no KO assigned   (GenBank) phosphohydrolase</a>                                                              | No COG                       | 76.768   | 102.213  | 102.815  | 111.944  | 71.745   | 315.860  |
| <a href="#">AMK58_09985</a> | <a href="#">no KO assigned   (GenBank) cytochrome c oxidase accessory protein CcoG</a>                                   | Energy                       | 41.502   | 41.488   | 72.629   | 226.535  | 78.332   | 256.432  |
| <a href="#">AMK58_09990</a> | <a href="#">no KO assigned   (GenBank) permease</a>                                                                      | enzyme                       | 335.752  | 305.029  | 354.603  | 327.954  | 333.401  | 732.909  |
| <a href="#">AMK58_09995</a> | <a href="#">no KO assigned   (GenBank) hypothetical protein</a>                                                          | Hypothetical                 | 41.048   | 63.886   | 39.685   | 226.413  | 124.849  | 398.861  |
| <a href="#">AMK58_10000</a> | <a href="#">K01754 threonine dehydratase [EC:4.3.1.191]   (GenBank) threonine dehydratase</a>                            | Metabolism: Amino Acid       | 120.949  | 153.507  | 162.787  | 305.400  | 143.701  | 299.851  |
| <a href="#">AMK58_10005</a> | <a href="#">no KO assigned   (GenBank) AAA family ATPase</a>                                                             | enzyme                       | 8.444    | 11.970   | 13.199   | 91.254   | 43.434   | 88.648   |
| <a href="#">AMK58_10010</a> | <a href="#">no KO assigned   (GenBank) pseudogene</a>                                                                    | Pseudogene                   | 19.624   | 28.757   | 28.868   | 219.720  | 73.665   | 136.990  |
| <a href="#">AMK58_10015</a> | <a href="#">K01872 alanyl-tRNA synthetase [EC:6.1.1.71]   (GenBank) alanine--tRNA ligase</a>                             | tRNA synthesis/modification  | 0.453    | 1.355    | 1.293    | 70.402   | 12.743   | 41.922   |
| <a href="#">AMK58_10020</a> | <a href="#">K03553 recombination protein RecA   (GenBank) DNA recombination/repair protein RecA</a>                      | DNA Repair and Replication   | 108.855  | 101.806  | 92.308   | 83.496   | 250.764  | 206.763  |
| <a href="#">AMK58_10025</a> | <a href="#">no KO assigned   (GenBank) hypothetical protein</a>                                                          | Hypothetical                 | 8.648    | 12.917   | 11.192   | 69.508   | 82.088   | 71.282   |
| <a href="#">AMK58_10030</a> | <a href="#">K13587 two-component system, cell cycle sensor histidine kinase and response regulator CckA [EC:2.7</a>      | Signal Transduction          | 185.734  | 211.337  | 210.368  | 155.573  | 760.096  | 199.739  |
| <a href="#">AMK58_10035</a> | <a href="#">K02401 flagellar biosynthetic protein FlhB   (GenBank) flagellar biosynthetic protein FlhB</a>               | Motility                     | 293.750  | 381.491  | 340.654  | 180.257  | 262.709  | 256.542  |
| <a href="#">AMK58_10040</a> | <a href="#">K02421 flagellar biosynthetic protein FlhR   (GenBank) flagellar biosynthetic protein FlhR</a>               | Motility                     | 10.521   | 7.506    | 15.379   | 109.807  | 71.489   | 183.184  |
| <a href="#">AMK58_10045</a> | <a href="#">K02420 flagellar biosynthetic protein FlhQ   (GenBank) flagellar biosynthesis protein</a>                    | Motility                     | 508.439  | 635.471  | 605.002  | 1276.266 | 935.694  | 1080.727 |

|                             |                                                                                                                            |                              |          |          |          |          |           |          |
|-----------------------------|----------------------------------------------------------------------------------------------------------------------------|------------------------------|----------|----------|----------|----------|-----------|----------|
| <a href="#">AMK58_10050</a> | <a href="#">K02408 flagellar hook-basal body complex protein FlIE</a>   (GenBank) flagellar hook-basal body protein        | Motility                     | 242.553  | 248.352  | 227.935  | 451.958  | 123.391   | 897.035  |
| <a href="#">AMK58_10055</a> | <a href="#">K02388 flagellar basal-body rod protein FlgC</a>   (GenBank) flagellar basal-body rod protein FlgC             | Motility                     | 141.107  | 142.559  | 152.091  | 119.568  | 66.557    | 308.127  |
| <a href="#">AMK58_10060</a> | <a href="#">K02387 flagellar basal-body rod protein FlgB</a>   (GenBank) flagellar biosynthesis protein FlgB               | Motility                     | 611.652  | 764.435  | 668.827  | 30.835   | 68.215    | 97.300   |
| <a href="#">AMK58_10065</a> | <a href="#">K04061 flagellar biosynthesis protein I</a>   (GenBank) flagellar protein FhlB                                 | Motility                     | 393.586  | 506.570  | 491.456  | 67.949   | 38.705    | 165.486  |
| <a href="#">AMK58_10070</a> | no KO assigned   (GenBank) hypothetical protein                                                                            | Hypothetical                 | 888.522  | 1090.774 | 966.938  | 89.674   | 45.724    | 209.392  |
| <a href="#">AMK58_10075</a> | <a href="#">K02418 flagellar protein FliO/FliZ</a>   (GenBank) hypothetical protein                                        | Motility                     | 785.545  | 923.570  | 852.428  | 425.738  | 38.884    | 340.485  |
| <a href="#">AMK58_10080</a> | <a href="#">K02419 flagellar biosynthetic protein FljP</a>   (GenBank) flagellar biosynthesis protein fljP                 | Motility                     | 47.725   | 62.193   | 54.514   | 37.758   | 12.781    | 93.855   |
| <a href="#">AMK58_10085</a> | <a href="#">K03549 KUP system potassium uptake protein I</a>   (GenBank) trkD <sub>2</sub> potassium transport protein Kup | Transport: Inorganic         | 1.658    | 2.285    | 1.455    | 10.590   | 0.430     | 1.655    |
| <a href="#">AMK58_10090</a> | no KO assigned   (GenBank) hypothetical protein                                                                            | Hypothetical                 | 1.348    | 1.271    | 2.327    | 13.254   | 0.678     | 3.486    |
| <a href="#">AMK58_10095</a> | <a href="#">K02557 chemotaxis protein MotB</a>   (GenBank) flagellar motor protein MotB                                    | Chemotaxis                   | 46.757   | 53.909   | 52.412   | 68.566   | 24.711    | 181.792  |
| <a href="#">AMK58_10100</a> | no KO assigned   (GenBank) pseudogene                                                                                      | Pseudogene                   | 152.338  | 134.709  | 164.662  | 461.938  | 343.534   | 589.811  |
| <a href="#">AMK58_10105</a> | <a href="#">K03414 chemotaxis protein CheZ</a>   (GenBank) chemotaxis protein CheZ                                         | Chemotaxis                   | 117.529  | 168.480  | 165.213  | 962.484  | 212.586   | 529.092  |
| <a href="#">AMK58_10110</a> | <a href="#">K06884 uncharacterized protein I</a>   (GenBank) glucose starvation-inducible protein B                        | Starvation                   | 67.145   | 76.817   | 79.802   | 668.837  | 110.802   | 292.100  |
| <a href="#">AMK58_10115</a> | no KO assigned   (GenBank) hypothetical protein                                                                            | Hypothetical                 | 16.900   | 20.344   | 20.386   | 149.515  | 12.759    | 70.753   |
| <a href="#">AMK58_10120</a> | no KO assigned   (GenBank) hypothetical protein                                                                            | Hypothetical                 | 236.530  | 258.414  | 243.029  | 220.810  | 96.280    | 203.696  |
| <a href="#">AMK58_10125</a> | <a href="#">K02416 flagellar motor switch protein FljM</a>   (GenBank) flagellar motor switch protein FljM                 | Motility                     | 9.279    | 12.023   | 9.886    | 52.714   | 336.652   | 133.417  |
| <a href="#">AMK58_10130</a> | <a href="#">K02415 flagellar FljI<sub>1</sub> protein I</a>   (GenBank) flagellar basal body protein FljI <sub>1</sub>     | Motility                     | 136.383  | 167.674  | 134.085  | 236.754  | 66.482    | 332.184  |
| <a href="#">AMK58_10135</a> | <a href="#">K02391 flagellar basal-body rod protein FljF</a>   (GenBank) flagellar biosynthesis protein FljF               | Motility                     | 30.478   | 49.024   | 38.851   | 65.502   | 12.423    | 64.442   |
| <a href="#">AMK58_10140</a> | <a href="#">K02392 flagellar basal-body rod protein FljG</a>   (GenBank) fljG: flagellar basal-body rod protein FljG       | Motility                     | 121.383  | 152.770  | 142.068  | 170.233  | 33.417    | 315.955  |
| <a href="#">AMK58_10145</a> | <a href="#">K02386 flagella basal body P-ring formation protein FlgA</a>   (GenBank) flagellin biosynthesis protein        | Motility                     | 168.237  | 180.146  | 176.427  | 54.476   | 17.555    | 121.733  |
| <a href="#">AMK58_10150</a> | <a href="#">K02393 flagellar L-ring protein precursor FlgH</a>   (GenBank) flagellar biosynthesis protein FlgH             | Motility                     | 161.747  | 206.405  | 214.411  | 138.626  | 33.538    | 197.746  |
| <a href="#">AMK58_10155</a> | no KO assigned   (GenBank) hypothetical protein                                                                            | Hypothetical                 | 33.193   | 41.429   | 38.021   | 78.709   | 9.769     | 35.537   |
| <a href="#">AMK58_10160</a> | <a href="#">K06204 DnaK suppressor protein I</a>   (GenBank) RNA polymerase-binding protein DksA                           | Transcription                | 82.158   | 98.170   | 114.023  | 415.119  | 58.974    | 171.345  |
| <a href="#">AMK58_10165</a> | no KO assigned   (GenBank) flagellar assembly protein FljX                                                                 | Motility                     | 231.987  | 216.833  | 214.226  | 295.591  | 128.913   | 395.502  |
| <a href="#">AMK58_10170</a> | <a href="#">K02394 flagellar P-ring protein precursor FljI</a>   (GenBank) fljI: flagellar biosynthesis protein FlgA       | Motility                     | 68.652   | 53.582   | 72.685   | 407.467  | 183.018   | 264.339  |
| <a href="#">AMK58_10175</a> | no KO assigned   (GenBank) flagellar biosynthesis protein FljJ                                                             | Motility                     | 854.861  | 1261.610 | 1060.102 | 268.672  | 3085.696  | 374.232  |
| <a href="#">AMK58_10180</a> | no KO assigned   (GenBank) flagellar basal-body protein                                                                    | Motility                     | 119.902  | 173.830  | 147.914  | 126.040  | 652.245   | 129.458  |
| <a href="#">AMK58_10185</a> | no KO assigned   (GenBank) hypothetical protein                                                                            | Hypothetical                 | 61.169   | 70.431   | 86.239   | 88.384   | 51.179    | 105.689  |
| <a href="#">AMK58_10190</a> | <a href="#">K02389 flagellar basal-body rod modification protein FlgD</a>   (GenBank) flagellar biosynthesis protein       | Motility                     | 35.542   | 40.683   | 34.741   | 79.424   | 42.377    | 27.105   |
| <a href="#">AMK58_10195</a> | no KO assigned   (GenBank) hypothetical protein                                                                            | Hypothetical                 | 117.916  | 157.251  | 165.171  | 192.273  | 71.794    | 120.731  |
| <a href="#">AMK58_10200</a> | no KO assigned   (GenBank) dehydratase                                                                                     | dehydratase                  | 266.311  | 333.124  | 316.072  | 664.037  | 617.791   | 404.516  |
| <a href="#">AMK58_10205</a> | <a href="#">K14229 tRNA Lys I</a>   (GenBank) tRNA-Lys                                                                     | tRNA synthesis/modification  | 2665.238 | 3159.922 | 2896.150 | 862.146  | 3905.517  | 3139.119 |
| <a href="#">AMK58_10210</a> | <a href="#">K14229 tRNA Lys I</a>   (GenBank) tRNA-Lys                                                                     | tRNA synthesis/modification  | 1108.790 | 1637.068 | 1161.792 | 544.176  | 96.698    | 1144.855 |
| <a href="#">AMK58_10215</a> | no KO assigned   (GenBank) hypothetical protein                                                                            | Hypothetical                 | 4.519    | 1.895    | 7.237    | 65.427   | 26.381    | 69.773   |
| <a href="#">AMK58_10220</a> | no KO assigned   (GenBank) hypothetical protein                                                                            | Hypothetical                 | 96.647   | 115.120  | 108.483  | 21.543   | 45.705    | 75.972   |
| <a href="#">AMK58_10225</a> | <a href="#">K06147 ATP-binding cassette, subfamily B, bacterial I</a>   (GenBank) ABC transporter                          | Membrane Transport           | 48.282   | 54.161   | 54.144   | 6.836    | 23.928    | 96.516   |
| <a href="#">AMK58_10230</a> | <a href="#">K02909 large subunit ribosomal protein L31</a>   (GenBank) 50S ribosomal protein L31                           | Ribosome                     | 71.569   | 80.373   | 95.165   | 1533.197 | 399.812   | 698.567  |
| <a href="#">AMK58_10235</a> | <a href="#">K13592 regulator of CtrA degradation I</a>   (GenBank) hypothetical protein                                    | Cell Cycle/Shape/Homeostasis | 11.870   | 10.638   | 15.801   | 469.465  | 309.879   | 298.285  |
| <a href="#">AMK58_10240</a> | <a href="#">K04080 molecular chaperone IbpA</a>   (GenBank) heat-shock protein                                             | Chaperone                    | 323.652  | 248.947  | 318.695  | 741.070  | 916.420   | 693.545  |
| <a href="#">AMK58_10245</a> | no KO assigned   (GenBank) hypothetical protein                                                                            | Hypothetical                 | 342.066  | 265.699  | 350.076  | 34.292   | 152.242   | 32.518   |
| <a href="#">AMK58_10250</a> | no KO assigned   (GenBank) alpha/beta hydrolase                                                                            | Hydrolase                    | 15.021   | 19.942   | 24.957   | 117.270  | 110.341   | 130.700  |
| <a href="#">AMK58_10255</a> | <a href="#">K01740 O-acetylhomoserine (thiol)-lyase [EC:2.5.1.491]</a>   (GenBank) O-acetylhomoserine aminocarboxypr       | Metabolism: Amino Acid       | 218.969  | 243.326  | 264.396  | 78.557   | 10549.558 | 637.736  |
| <a href="#">AMK58_10260</a> | <a href="#">K06048 carboxylate-amine lyase [EC:6.3.-.-1]</a>   (GenBank) carboxylate-amine lyase                           | enzyme                       | 71.724   | 77.388   | 81.733   | 172.511  | 152.338   | 335.022  |
| <a href="#">AMK58_10265</a> | no KO assigned   (GenBank) N-formylglutamate amidohydrolase                                                                | enzyme                       | 119.411  | 111.031  | 120.657  | 148.252  | 31.334    | 98.252   |
| <a href="#">AMK58_10270</a> | no KO assigned   (GenBank) hypothetical protein                                                                            | Hypothetical                 | 466.457  | 372.253  | 407.292  | 230.285  | 111.262   | 306.214  |
| <a href="#">AMK58_10275</a> | no KO assigned   (GenBank) transcriptional regulator                                                                       | Transcription                | 87.417   | 96.820   | 101.933  | 183.685  | 109.996   | 275.400  |
| <a href="#">AMK58_10280</a> | <a href="#">K00939 adenylate kinase [EC:2.7.4.31]</a>   (GenBank) adenylate kinase                                         | Metabolism                   | 56.614   | 79.257   | 86.339   | 342.643  | 79.808    | 147.614  |
| <a href="#">AMK58_10285</a> | <a href="#">K03076 preprotein translocase subunit SecY</a>   (GenBank) preprotein translocase subunit SecY                 | Secretion system             | 165.225  | 178.007  | 192.380  | 110.301  | 149.388   | 188.288  |
| <a href="#">AMK58_10290</a> | <a href="#">K02876 large subunit ribosomal protein L15</a>   (GenBank) 50S ribosomal protein L15                           | Ribosome                     | 453.159  | 501.586  | 501.691  | 395.453  | 273.306   | 475.876  |
| <a href="#">AMK58_10295</a> | <a href="#">K02907 large subunit ribosomal protein L30</a>   (GenBank) 50S ribosomal protein L30                           | Ribosome                     | 2751.298 | 3055.424 | 2391.116 | 628.470  | 939.894   | 709.287  |
| <a href="#">AMK58_10300</a> | <a href="#">K02988 small subunit ribosomal protein S5</a>   (GenBank) 30S ribosomal protein S5                             | Ribosome                     | 1691.302 | 1240.393 | 1256.023 | 282.014  | 335.089   | 623.463  |
| <a href="#">AMK58_10305</a> | <a href="#">K02881 large subunit ribosomal protein L18</a>   (GenBank) 50S ribosomal protein L18                           | Ribosome                     | 2679.989 | 2542.704 | 2738.435 | 165.760  | 926.783   | 407.635  |
| <a href="#">AMK58_10310</a> | <a href="#">K02933 large subunit ribosomal protein L6</a>   (GenBank) 50S ribosomal protein L6                             | Ribosome                     | 605.147  | 456.500  | 413.695  | 50.721   | 197.259   | 55.294   |
| <a href="#">AMK58_10315</a> | <a href="#">K02994 small subunit ribosomal protein S8</a>   (GenBank) 30S ribosomal protein S8                             | Ribosome                     | 1806.715 | 1816.547 | 1803.242 | 327.624  | 650.450   | 481.156  |
| <a href="#">AMK58_10320</a> | <a href="#">K02954 small subunit ribosomal protein S14</a>   (GenBank) 30S ribosomal protein S14                           | Ribosome                     | 1839.466 | 1609.821 | 1415.286 | 99.644   | 611.975   | 351.485  |
| <a href="#">AMK58_10325</a> | <a href="#">K02931 large subunit ribosomal protein L5</a>   (GenBank) 50S ribosomal protein L5                             | Ribosome                     | 2370.212 | 2135.431 | 1752.013 | 33.751   | 615.552   | 182.567  |
| <a href="#">AMK58_10330</a> | <a href="#">K02895 large subunit ribosomal protein L24</a>   (GenBank) 50S ribosomal protein L24                           | Ribosome                     | 3890.765 | 2806.984 | 2645.926 | 112.204  | 737.813   | 314.920  |
| <a href="#">AMK58_10335</a> | <a href="#">K02874 large subunit ribosomal protein L14</a>   (GenBank) 50S ribosomal protein L14                           | Ribosome                     | 3267.379 | 2816.970 | 2469.598 | 32.086   | 535.890   | 149.693  |
| <a href="#">AMK58_10340</a> | <a href="#">K02961 small subunit ribosomal protein S17</a>   (GenBank) 30S ribosomal protein S17                           | Ribosome                     | 6833.841 | 5840.742 | 5353.256 | 158.370  | 1258.462  | 601.853  |
| <a href="#">AMK58_10345</a> | <a href="#">K02904 large subunit ribosomal protein L29</a>   (GenBank) 50S ribosomal protein L29                           | Ribosome                     | 4135.844 | 3931.280 | 3531.426 | 47.010   | 784.344   | 277.149  |
| <a href="#">AMK58_10350</a> | <a href="#">K02878 large subunit ribosomal protein L16</a>   (GenBank) 50S ribosomal protein L16                           | Ribosome                     | 1779.715 | 1652.421 | 1554.508 | 31.001   | 374.653   | 124.308  |
| <a href="#">AMK58_10355</a> | <a href="#">K02982 small subunit ribosomal protein S3</a>   (GenBank) 30S ribosomal protein S3                             | Ribosome                     | 1004.905 | 809.004  | 749.829  | 11.689   | 179.881   | 52.595   |
| <a href="#">AMK58_10360</a> | <a href="#">K02890 large subunit ribosomal protein L22</a>   (GenBank) 50S ribosomal protein L22                           | Ribosome                     | 956.063  | 1004.660 | 852.345  | 36.041   | 200.016   | 68.609   |
| <a href="#">AMK58_10365</a> | <a href="#">K02965 small subunit ribosomal protein S19</a>   (GenBank) 30S ribosomal protein S19                           | Ribosome                     | 2316.043 | 1778.573 | 2023.865 | 242.988  | 673.637   | 283.692  |
| <a href="#">AMK58_10370</a> | <a href="#">K02886 large subunit ribosomal protein L2</a>   (GenBank) rplB: 50S ribosomal protein L2                       | Ribosome                     | 1371.888 | 1068.435 | 1244.063 | 134.763  | 484.709   | 218.980  |
| <a href="#">AMK58_10375</a> | <a href="#">K02892 large subunit ribosomal protein L23</a>   (GenBank) 50S ribosomal protein L23                           | Ribosome                     | 3171.550 | 2274.703 | 2421.480 | 121.384  | 910.284   | 259.491  |
| <a href="#">AMK58_10380</a> | <a href="#">K02926 large subunit ribosomal protein L4</a>   (GenBank) 50S ribosomal protein L4                             | Ribosome                     | 914.592  | 608.038  | 754.298  | 38.131   | 266.269   | 150.054  |

|             |                                                                                                                       |                                     |           |          |          |          |          |          |
|-------------|-----------------------------------------------------------------------------------------------------------------------|-------------------------------------|-----------|----------|----------|----------|----------|----------|
| AMK58_10385 | <a href="#">K02906 large subunit ribosomal protein L3   (GenBank) 50S ribosomal protein L3</a>                        | Ribosome                            | 2376.540  | 1835.349 | 2094.161 | 123.407  | 780.382  | 295.912  |
| AMK58_10390 | <a href="#">K02946 small subunit ribosomal protein S10   (GenBank) rpsJ; 30S ribosomal protein S10</a>                | Ribosome                            | 2860.735  | 2069.406 | 2195.829 | 37.791   | 827.130  | 167.860  |
| AMK58_10395 | <a href="#">K02358 elongation factor Tu   (GenBank) tuf; elongation factor Tu</a>                                     | translation                         | 1042.707  | 725.178  | 881.612  | 65.909   | 347.032  | 100.769  |
| AMK58_10400 | <a href="#">K02355 elongation factor G   (GenBank) fusA; elongation factor G</a>                                      | translation                         | 657.554   | 514.943  | 646.416  | 38.850   | 231.797  | 75.656   |
| AMK58_10405 | <a href="#">K02992 small subunit ribosomal protein S7   (GenBank) 30S ribosomal protein S7</a>                        | Ribosome                            | 2137.703  | 1862.909 | 1788.621 | 40.633   | 704.737  | 128.478  |
| AMK58_10410 | <a href="#">K02950 small subunit ribosomal protein S12   (GenBank) 30S ribosomal protein S12</a>                      | Ribosome                            | 1574.949  | 1405.877 | 1487.881 | 25.723   | 686.319  | 67.000   |
| AMK58_10415 | <a href="#">K18199 cvclohexyl-isoecvanide hvdrtase [EC:4.2.1.1031]   (GenBank) AraC family transcriptional regula</a> | Transcription                       | 2153.402  | 1946.171 | 1827.553 | 223.062  | 1104.947 | 803.184  |
| AMK58_10420 | <a href="#">K03046 DNA-directed RNA polymerase subunit beta' [EC:2.7.7.61]   (GenBank) DNA-directed RNA poly</a>      | Transcription                       | 242.004   | 196.885  | 218.229  | 17.424   | 71.898   | 23.127   |
| AMK58_10425 | <a href="#">K03043 DNA-directed RNA polymerase subunit beta [EC:2.7.7.61]   (GenBank) DNA-directed RNA polyr</a>      | Transcription                       | 329.377   | 272.854  | 289.774  | 4.022    | 92.254   | 13.224   |
| AMK58_10430 | <a href="#">K02935 large subunit ribosomal protein L7/L12   (GenBank) 50S ribosomal protein L7</a>                    | Ribosome                            | 233.432   | 223.758  | 245.894  | 312.694  | 164.763  | 316.451  |
| AMK58_10435 | <a href="#">K02864 large subunit ribosomal protein L10   (GenBank) 50S ribosomal protein L10</a>                      | Ribosome                            | 6419.063  | 5678.132 | 6150.767 | 844.679  | 5778.847 | 1858.831 |
| AMK58_10440 | <a href="#">K02863 large subunit ribosomal protein L1   (GenBank) 50S ribosomal protein L1</a>                        | Ribosome                            | 4420.265  | 3782.676 | 4037.198 | 706.964  | 4773.537 | 1610.478 |
| AMK58_10445 | <a href="#">K02867 large subunit ribosomal protein L11   (GenBank) 50S ribosomal protein L11</a>                      | Ribosome                            | 2807.265  | 2221.616 | 2158.943 | 158.085  | 1614.973 | 129.304  |
| AMK58_10450 | <a href="#">K02601 transcriptional antiterminator NusG   (GenBank) antitermination protein NusG</a>                   | Transcription                       | 3478.791  | 3411.078 | 2960.356 | 83.384   | 2870.003 | 1476.843 |
| AMK58_10455 | <a href="#">K03073 preprotein translocase subunit SecE   (GenBank) preprotein translocase subunit SecE</a>            | Secretion System                    | 3179.130  | 3021.288 | 3258.796 | 641.371  | 5157.107 | 928.209  |
| AMK58_10460 | <a href="#">K14235 tRNA Trp   (GenBank) tRNA-Trp</a>                                                                  | tRNA synthesis/modification         | 10018.939 | 8642.195 | 8065.899 | 243.279  | 9927.640 | 1223.149 |
| AMK58_10465 | <a href="#">K02358 elongation factor Tu   (GenBank) tuf; elongation factor Tu</a>                                     | translation                         | 306.296   | 290.921  | 281.950  | 21.652   | 509.635  | 111.044  |
| AMK58_10470 | <a href="#">K14225 tRNA Gly   (GenBank) tRNA-Gly</a>                                                                  | tRNA synthesis/modification         | 2949.971  | 2688.146 | 2557.507 | 105.202  | 2986.694 | 321.637  |
| AMK58_10475 | <a href="#">K14236 tRNA Tyr   (GenBank) tRNA-Tyr</a>                                                                  | tRNA synthesis/modification         | 2069.534  | 1741.100 | 1499.223 | 60.348   | 1783.454 | 375.973  |
| AMK58_10480 | <a href="#">K03218 23S rRNA (guanosine2251-2'-O)-methyltransferase [EC:2.1.1.1851]   (GenBank) pseudouridine sv</a>   | Ribosome                            | 1110.773  | 939.939  | 798.562  | 17.641   | 931.960  | 49.372   |
| AMK58_10485 | <a href="#">K14234 tRNA Thr   (GenBank) tRNA-Thr</a>                                                                  | tRNA synthesis/modification         | 4608.807  | 3921.349 | 3289.978 | 142.980  | 4247.540 | 502.259  |
| AMK58_10490 | <a href="#">no KO assigned   (GenBank) hypothetical protein</a>                                                       | Hypothetical                        | 269.583   | 200.144  | 177.318  | 46.642   | 275.744  | 194.699  |
| AMK58_10495 | <a href="#">no KO assigned   (GenBank) hypothetical protein</a>                                                       | Hypothetical                        | 72.734    | 100.687  | 94.878   | 639.832  | 111.168  | 459.360  |
| AMK58_10500 | <a href="#">K01991 polysaccharide biosynthesis/export protein   (GenBank) polysaccharide biosynthesis protein</a>     | Transport: polysacchharide          | 3.592     | 5.050    | 3.616    | 32.267   | 12.351   | 36.835   |
| AMK58_10505 | <a href="#">no KO assigned   (GenBank) hypothetical protein</a>                                                       | Hypothetical                        | 5.567     | 7.760    | 7.937    | 48.966   | 27.427   | 77.858   |
| AMK58_10510 | <a href="#">no KO assigned   (GenBank) MarR family transcriptional regulator</a>                                      | Transcription                       | 3.844     | 3.281    | 7.831    | 108.124  | 145.351  | 94.449   |
| AMK58_10515 | <a href="#">K01999 branched-chain amino acid transport system substrate-binding protein   (GenBank) ABC transpor</a>  | Transport: Amino Acid               | 44.493    | 55.281   | 106.508  | 73.445   | 98.806   | 83.609   |
| AMK58_10520 | <a href="#">K01997 branched-chain amino acid transport system permease protein K01998 branched-chain amino acid</a>   | Transport: Amino Acid               | 625.356   | 540.357  | 512.723  | 138.237  | 73.218   | 182.728  |
| AMK58_10525 | <a href="#">K01995 branched-chain amino acid transport system ATP-binding protein   (GenBank) ABC transporter A</a>   | Transport: Amino Acid               | 88.496    | 78.436   | 86.455   | 91.623   | 96.923   | 121.738  |
| AMK58_10530 | <a href="#">K01996 branched-chain amino acid transport system ATP-binding protein   (GenBank) ABC transporter A</a>   | Transport: Amino Acid               | 137.792   | 129.135  | 129.248  | 370.517  | 290.218  | 324.282  |
| AMK58_10535 | <a href="#">no KO assigned   (GenBank) hypothetical protein</a>                                                       | Hypothetical                        | 99.419    | 88.214   | 94.997   | 1153.102 | 469.134  | 587.818  |
| AMK58_10540 | <a href="#">K01087 trehalose 6-phosphate phosphatase [EC:3.1.3.12]   (GenBank) trehalose phosphatase</a>              | Metabolism: Carbohydrate            | 7.338     | 8.768    | 10.326   | 209.564  | 49.323   | 100.566  |
| AMK58_10545 | <a href="#">K01443 N-acetylglucosamine-6-phosphate deacetylase [EC:3.5.1.25]   (GenBank) N-acetylglucosamine-6-t</a>  | Metabolism: Carbohydrate            | 22.176    | 17.582   | 22.684   | 110.658  | 61.431   | 55.258   |
| AMK58_10550 | <a href="#">no KO assigned   (GenBank) hypothetical protein</a>                                                       | Hypothetical                        | 51.365    | 46.032   | 56.513   | 208.384  | 85.368   | 67.362   |
| AMK58_10555 | <a href="#">K00847 fructokinase [EC:2.7.1.41]   (GenBank) hypothetical protein</a>                                    | Metabolism: Carbohydrates           | 12.377    | 8.037    | 14.070   | 215.707  | 135.791  | 164.912  |
| AMK58_10560 | <a href="#">no KO assigned   (GenBank) hypothetical protein</a>                                                       | Hypothetical                        | 4.754     | 5.621    | 7.063    | 84.708   | 7.904    | 54.367   |
| AMK58_10565 | <a href="#">K03406 methyl-accepting chemotaxis protein   (GenBank) chemotaxis protein</a>                             | Chemotaxis                          | 2.648     | 1.283    | 2.926    | 19.554   | 11.180   | 33.641   |
| AMK58_10570 | <a href="#">no KO assigned   (GenBank) hypothetical protein</a>                                                       | Hypothetical                        | 2.420     | 5.163    | 5.752    | 107.082  | 6.314    | 41.670   |
| AMK58_10575 | <a href="#">K11963 urea transport system ATP-binding protein   (GenBank) urea ABC transporter ATP-binding subur</a>   | Transport: Inorganic                | 65.756    | 70.673   | 142.245  | 588.856  | 394.788  | 317.936  |
| AMK58_10580 | <a href="#">K11962 urea transport system ATP-binding protein   (GenBank) urea ABC transporter ATP-binding protei</a>  | Transport: Inorganic                | 12.804    | 14.525   | 22.962   | 346.300  | 116.781  | 609.142  |
| AMK58_10585 | <a href="#">K11961 urea transport system permease protein   (GenBank) urea ABC transporter permease subunit UrtC</a>  | Transport: Inorganic                | 259.355   | 290.611  | 278.507  | 267.607  | 251.772  | 223.358  |
| AMK58_10590 | <a href="#">K11960 urea transport system permease protein   (GenBank) urea ABC transporter permease</a>               | Transport: Inorganic                | 1.056     | 0.901    | 3.228    | 105.901  | 6.359    | 65.823   |
| AMK58_10595 | <a href="#">K11959 urea transport system substrate-binding protein   (GenBank) branched-chain amino acid ABC tra</a>  | Transport: Inorganic                | 0.826     | 3.836    | 3.401    | 102.963  | 18.146   | 108.612  |
| AMK58_10600 | <a href="#">no KO assigned   (GenBank) endonuclease</a>                                                               | DNA Repair and Replication          | 2.663     | 8.372    | 7.328    | 269.184  | 33.708   | 282.233  |
| AMK58_10605 | <a href="#">no KO assigned   (GenBank) hypothetical protein</a>                                                       | Hypothetical                        | 2.890     | 4.933    | 4.809    | 238.647  | 22.624   | 238.800  |
| AMK58_10610 | <a href="#">no KO assigned   (GenBank) oxidoreductase</a>                                                             | Oxidoreductase                      | 17.762    | 18.837   | 15.289   | 155.850  | 112.938  | 242.179  |
| AMK58_10615 | <a href="#">no KO assigned   (GenBank) hypothetical protein</a>                                                       | Hypothetical                        | 42.722    | 52.677   | 41.311   | 110.316  | 26.360   | 161.662  |
| AMK58_10620 | <a href="#">K02049 NiT/TauT family transport system ATP-binding protein   (GenBank) ABC transporter ATP-bindin</a>    | Transport: NiT/TauT                 | 156.650   | 138.420  | 158.040  | 337.787  | 85.352   | 210.956  |
| AMK58_10625 | <a href="#">K02043 NiT/TauT family transport system substrate-binding protein   (GenBank) nitrate ABC transport</a>   | Transport: NiT/TauT                 | 207.730   | 199.122  | 199.586  | 190.110  | 79.694   | 218.358  |
| AMK58_10630 | <a href="#">K02050 NiT/TauT family transport system permease protein   (GenBank) ABC transporter permease</a>         | Transport: NiT/TauT                 | 75.150    | 85.916   | 75.864   | 433.738  | 58.748   | 172.204  |
| AMK58_10635 | <a href="#">no KO assigned   (GenBank) TetR family transcriptional regulator</a>                                      | Transcription                       | 436.798   | 426.758  | 407.501  | 193.283  | 190.089  | 359.826  |
| AMK58_10640 | <a href="#">no KO assigned   (GenBank) hypothetical protein</a>                                                       | Hypothetical                        | 295.961   | 277.878  | 259.241  | 46.029   | 103.799  | 96.507   |
| AMK58_10645 | <a href="#">no KO assigned   (GenBank) hypothetical protein</a>                                                       | Hypothetical                        | 158.305   | 137.932  | 143.145  | 38.481   | 68.294   | 76.236   |
| AMK58_10650 | <a href="#">no KO assigned   (GenBank) hypothetical protein</a>                                                       | Hypothetical                        | 187.640   | 253.644  | 194.357  | 611.532  | 380.000  | 763.531  |
| AMK58_10655 | <a href="#">no KO assigned   (GenBank) hypothetical protein</a>                                                       | Hypothetical                        | 16.537    | 16.467   | 33.319   | 609.186  | 376.414  | 276.019  |
| AMK58_10660 | <a href="#">no KO assigned   (GenBank) cupin</a>                                                                      | No COG                              | 10.954    | 18.945   | 25.765   | 1134.143 | 184.374  | 602.781  |
| AMK58_10665 | <a href="#">no KO assigned   (GenBank) acetyl-CoA synthetase</a>                                                      | Oxidoreductase                      | 25.735    | 24.847   | 22.003   | 6.799    | 22.594   | 9.682    |
| AMK58_10670 | <a href="#">K02049 NiT/TauT family transport system ATP-binding protein   (GenBank) nitrate ABC transporter ATP</a>   | Transport: NiT/TauT                 | 49.275    | 56.074   | 47.743   | 233.221  | 85.102   | 196.544  |
| AMK58_10675 | <a href="#">K02050 NiT/TauT family transport system permease protein   (GenBank) ABC transporter permease</a>         | Transport: NiT/TauT                 | 59.724    | 63.592   | 56.084   | 113.273  | 12.463   | 129.405  |
| AMK58_10680 | <a href="#">K02051 NiT/TauT family transport system substrate-binding protein   (GenBank) ABC transporter subst</a>   | Transport: NiT/TauT                 | 184.867   | 192.329  | 211.445  | 901.614  | 135.162  | 695.348  |
| AMK58_10685 | <a href="#">no KO assigned   (GenBank) lytic murein transglycosylase</a>                                              | enzyme                              | 102.267   | 88.956   | 92.021   | 814.079  | 70.229   | 307.016  |
| AMK58_10690 | <a href="#">K02836 peptide chain release factor 2   (GenBank) peptide chain release factor 2</a>                      | Translation                         | 44.142    | 39.935   | 40.412   | 114.375  | 44.519   | 129.461  |
| AMK58_10695 | <a href="#">no KO assigned   (GenBank) alginate biosynthesis protein</a>                                              | Biosynthesis: secondary metabolites | 126.540   | 100.466  | 126.391  | 150.698  | 86.570   | 151.486  |
| AMK58_10700 | <a href="#">no KO assigned   (GenBank) hypothetical protein</a>                                                       | Hypothetical                        | 79.831    | 77.853   | 84.084   | 173.541  | 98.266   | 102.650  |
| AMK58_10705 | <a href="#">K05366 penicillin-binding protein 1A [EC:2.4.1.-.3.4.-.-1]   (GenBank) penicillin-binding protein</a>     | Cell Wall                           | 106.079   | 114.654  | 108.380  | 66.915   | 95.498   | 85.980   |
| AMK58_10710 | <a href="#">K01448 N-acetylmuramoyl-L-alanine amidase [EC:3.5.1.281]   (GenBank) N-acetylmuramoyl-L-alanine ami</a>   | Cell Wall                           | 7.177     | 2.227    | 10.989   | 136.591  | 16.239   | 217.107  |
| AMK58_10715 | <a href="#">K08300 ribonuclease E [EC:3.1.26.12]   (GenBank) ribonuclease E</a>                                       | Genetic Information Processing      | 3.166     | 3.419    | 6.130    | 50.485   | 13.678   | 55.640   |

|                             |                                                                                                                                       |                                     |          |          |          |          |          |          |
|-----------------------------|---------------------------------------------------------------------------------------------------------------------------------------|-------------------------------------|----------|----------|----------|----------|----------|----------|
| <a href="#">AMK58_10720</a> | <a href="#">K04760 transcription elongation factor GreB</a>   (GenBank) <a href="#">transcription elongation factor GreB</a>          | Transcription                       | 837.434  | 759.267  | 755.213  | 621.137  | 956.754  | 735.327  |
| <a href="#">AMK58_10725</a> | <a href="#">K01560 2-haloacid dehalogenase [EC:3.8.1.21]</a>   (GenBank) <a href="#">2-haloalkanoic acid dehalogenase</a>             | Metabolism                          | 282.112  | 294.306  | 322.784  | 396.719  | 127.643  | 268.934  |
| <a href="#">AMK58_10730</a> | <a href="#">no KO assigned</a>   (GenBank) <a href="#">hypothetical protein</a>                                                       | Hypothetical                        | 1833.578 | 1778.727 | 1967.986 | 481.194  | 1220.698 | 447.445  |
| <a href="#">AMK58_10735</a> | <a href="#">no KO assigned</a>   (GenBank) <a href="#">peptidase</a>                                                                  | Peptidase                           | 13.238   | 8.239    | 15.734   | 40.393   | 54.768   | 91.470   |
| <a href="#">AMK58_10740</a> | <a href="#">K00681 gamma-glutamyltranspeptidase / glutathione hydrolase [EC:2.3.2.2.3.4.19.131]</a>   (GenBank) <a href="#">gamma</a> | Metabolism: amino acids             | 30.597   | 25.233   | 25.433   | 111.896  | 68.680   | 137.422  |
| <a href="#">AMK58_10745</a> | <a href="#">no KO assigned</a>   (GenBank) <a href="#">L-aminocyclopropane-1-carboxylate deaminase</a>                                | No COG                              | 68.976   | 68.891   | 64.088   | 104.333  | 90.375   | 107.507  |
| <a href="#">AMK58_10750</a> | <a href="#">K01919 glutamate-cysteine ligase [EC:6.3.2.21]</a>   (GenBank) <a href="#">glutamate-cysteine ligase</a>                  | Metabolism: Amino Acid              | 59.429   | 68.891   | 65.698   | 227.060  | 343.374  | 210.475  |
| <a href="#">AMK58_10755</a> | <a href="#">K09761 16S rRNA (uracil1498-N3)-methyltransferase [EC:2.1.1.1931]</a>   (GenBank) <a href="#">16S rRNA methyltrans</a>    | Ribosome                            | 72.645   | 53.683   | 72.112   | 174.222  | 86.449   | 52.957   |
| <a href="#">AMK58_10760</a> | <a href="#">K03179 4-hydroxybenzoate polyprenyltransferase [EC:2.5.1.391]</a>   (GenBank) <a href="#">4-hydroxybenzoate octapreny</a> | Metabolism: Co-Factors and Vitamins | 101.222  | 99.881   | 116.485  | 306.176  | 163.694  | 279.039  |
| <a href="#">AMK58_10765</a> | <a href="#">no KO assigned</a>   (GenBank) <a href="#">hypothetical protein</a>                                                       | Hypothetical                        | 261.041  | 225.728  | 219.080  | 202.253  | 223.283  | 266.873  |
| <a href="#">AMK58_10770</a> | <a href="#">no KO assigned</a>   (GenBank) <a href="#">nicotinamide N-methylase</a>                                                   | methyltransferase                   | 60.721   | 59.184   | 76.746   | 282.597  | 105.988  | 236.787  |
| <a href="#">AMK58_10775</a> | <a href="#">no KO assigned</a>   (GenBank) <a href="#">DNA alkylation repair protein</a>                                              | DNA Repair and Replication          | 74.639   | 66.098   | 78.376   | 207.481  | 128.737  | 170.066  |
| <a href="#">AMK58_10780</a> | <a href="#">K03182 4-hydroxy-3-polyprenylbenzoate decarboxylase [EC:4.1.1.981]</a>   (GenBank) <a href="#">hypothetical protein</a>   | Metabolism: Co-Factors and Vitamins | 130.284  | 121.038  | 124.864  | 92.785   | 29.253   | 113.532  |
| <a href="#">AMK58_10785</a> | <a href="#">no KO assigned</a>   (GenBank) <a href="#">hypothetical protein</a>                                                       | Hypothetical                        | 28.175   | 35.745   | 31.236   | 109.727  | 27.145   | 117.717  |
| <a href="#">AMK58_10790</a> | <a href="#">K15977 putative oxidoreductase</a>   (GenBank) <a href="#">hypothetical protein</a>                                       | Oxidoreductase                      | 14.798   | 24.112   | 21.745   | 296.620  | 46.272   | 91.562   |
| <a href="#">AMK58_10795</a> | <a href="#">K03592 PmbA protein</a>   (GenBank) <a href="#">modulator protein</a>                                                     | Peptidase                           | 57.323   | 53.345   | 58.069   | 209.311  | 77.380   | 189.434  |
| <a href="#">AMK58_10800</a> | <a href="#">no KO assigned</a>   (GenBank) <a href="#">hypothetical protein</a>                                                       | Hypothetical                        | 7.741    | 9.878    | 13.005   | 167.320  | 38.015   | 167.464  |
| <a href="#">AMK58_10805</a> | <a href="#">no KO assigned</a>   (GenBank) <a href="#">lipid kinase</a>                                                               | No COG                              | 4.188    | 3.033    | 5.430    | 100.304  | 27.532   | 112.858  |
| <a href="#">AMK58_10810</a> | <a href="#">no KO assigned</a>   (GenBank) <a href="#">UDP-2,3-diacetylglucosamine hydrolase</a>                                      | hydrolase                           | 413.887  | 434.355  | 480.615  | 298.683  | 848.732  | 268.598  |
| <a href="#">AMK58_10815</a> | <a href="#">no KO assigned</a>   (GenBank) <a href="#">alpha-mannosyltransferase</a>                                                  | transferase                         | 863.764  | 1237.452 | 1089.654 | 316.092  | 209.657  | 436.941  |
| <a href="#">AMK58_10820</a> | <a href="#">no KO assigned</a>   (GenBank) <a href="#">chemotaxis protein</a>                                                         | Chemotaxis                          | 6.429    | 4.801    | 7.980    | 163.621  | 27.399   | 90.660   |
| <a href="#">AMK58_10825</a> | <a href="#">K02527 3-deoxy-D-manno-octulosonic-acid transferase [EC:2.4.99.12.2.4.99.13.2.4.99.14.2.4.99.151]</a>   (                 | Lipopolysaccharide biosynthesis     | 1.980    | 1.690    | 2.510    | 39.157   | 30.844   | 154.415  |
| <a href="#">AMK58_10830</a> | <a href="#">K00912 tetraacyldisaccharide 4'-kinase [EC:2.7.1.1301]</a>   (GenBank) <a href="#">tetraacyldisaccharide 4'-kinase</a>    | Lipopolysaccharide biosynthesis     | 11.976   | 12.163   | 18.105   | 270.951  | 52.768   | 195.001  |
| <a href="#">AMK58_10835</a> | <a href="#">K02517 Kdo2-lipid IVA lauroyltransferase [EC:2.3.1.2411]</a>   (GenBank) <a href="#">lauroyl acyltransferase</a>          | Lipopolysaccharide biosynthesis     | 61.137   | 66.049   | 47.238   | 300.820  | 167.234  | 257.763  |
| <a href="#">AMK58_10840</a> | <a href="#">no KO assigned</a>   (GenBank) <a href="#">transporter</a>                                                                | transport                           | 61.078   | 58.127   | 62.185   | 312.304  | 90.107   | 154.705  |
| <a href="#">AMK58_10845</a> | <a href="#">no KO assigned</a>   (GenBank) <a href="#">NADH dehydrogenase</a>                                                         | Energy                              | 3.389    | 9.203    | 9.081    | 208.819  | 29.089   | 48.850   |
| <a href="#">AMK58_10850</a> | <a href="#">K02067 phospholipid/cholesterol/gamma-HCH transport system substrate-binding protein</a>   (GenBank) <a href="#">out</a>  | Transport: phospholipid             | 21.176   | 29.768   | 28.188   | 220.920  | 69.727   | 152.003  |
| <a href="#">AMK58_10855</a> | <a href="#">no KO assigned</a>   (GenBank) <a href="#">hypothetical protein</a>                                                       | Hypothetical                        | 100.647  | 98.233   | 78.167   | 473.876  | 48.165   | 220.843  |
| <a href="#">AMK58_10860</a> | <a href="#">no KO assigned</a>   (GenBank) <a href="#">hypothetical protein</a>                                                       | Hypothetical                        | 1297.770 | 1461.781 | 1243.524 | 107.279  | 894.529  | 312.250  |
| <a href="#">AMK58_10865</a> | <a href="#">no KO assigned</a>   (GenBank) <a href="#">carnitine dehydratase</a>                                                      | Dehydratase                         | 89.963   | 113.085  | 82.331   | 29.435   | 73.366   | 78.680   |
| <a href="#">AMK58_10870</a> | <a href="#">no KO assigned</a>   (GenBank) <a href="#">hypothetical protein</a>                                                       | Hypothetical                        | 2.771    | 6.069    | 4.127    | 42.680   | 6.229    | 59.946   |
| <a href="#">AMK58_10875</a> | <a href="#">no KO assigned</a>   (GenBank) <a href="#">cytidine deaminase</a>                                                         | No COG                              | 5.584    | 12.132   | 5.792    | 47.262   | 17.404   | 133.453  |
| <a href="#">AMK58_10880</a> | <a href="#">K09919 uncharacterized protein</a>   (GenBank) <a href="#">hypothetical protein</a>                                       | Hypothetical                        | 57.597   | 69.064   | 62.091   | 209.456  | 80.357   | 152.984  |
| <a href="#">AMK58_10885</a> | <a href="#">no KO assigned</a>   (GenBank) <a href="#">hypothetical protein</a>                                                       | Hypothetical                        | 191.184  | 242.664  | 199.244  | 536.114  | 359.135  | 420.531  |
| <a href="#">AMK58_10890</a> | <a href="#">no KO assigned</a>   (GenBank) <a href="#">flagellin</a>                                                                  | motility                            | 27.900   | 28.686   | 30.908   | 60.928   | 26.839   | 58.241   |
| <a href="#">AMK58_10895</a> | <a href="#">no KO assigned</a>   (GenBank) <a href="#">septum formation initiator</a>                                                 | Cell Cycle/Shape/Homeostasis        | 92.548   | 90.203   | 87.443   | 179.785  | 263.619  | 115.366  |
| <a href="#">AMK58_10900</a> | <a href="#">K07216 hemerythrin</a>   (GenBank) <a href="#">hypothetical protein</a>                                                   | hemerythrin                         | 315.847  | 287.545  | 317.948  | 267.959  | 134.966  | 230.118  |
| <a href="#">AMK58_10905</a> | <a href="#">K00525 ribonucleoside-diphosphate reductase alpha chain [EC:1.17.4.11]</a>   (GenBank) <a href="#">ribonucleotide-dip</a> | Metabolism: Nucleotide              | 491.492  | 626.714  | 550.467  | 55.414   | 33.926   | 91.053   |
| <a href="#">AMK58_10910</a> | <a href="#">no KO assigned</a>   (GenBank) <a href="#">hypothetical protein</a>                                                       | Hypothetical                        | 68.372   | 73.754   | 81.486   | 778.810  | 411.482  | 620.565  |
| <a href="#">AMK58_10915</a> | <a href="#">K07216 hemerythrin</a>   (GenBank) <a href="#">hypothetical protein</a>                                                   | hemerythrin                         | 60.668   | 66.891   | 54.712   | 226.363  | 22.243   | 254.236  |
| <a href="#">AMK58_10920</a> | <a href="#">no KO assigned</a>   (GenBank) <a href="#">hypothetical protein</a>                                                       | Hypothetical                        | 1489.315 | 1229.847 | 1396.867 | 496.954  | 781.798  | 775.037  |
| <a href="#">AMK58_10925</a> | <a href="#">K01048 lysophospholipase [EC:3.1.1.51]</a>   (GenBank) <a href="#">lysophospholipase</a>                                  | Metabolism: Lipid                   | 1.157    | 1.536    | 4.522    | 180.264  | 658.940  | 118.586  |
| <a href="#">AMK58_10930</a> | <a href="#">K03642 rare lipoprotein A</a>   (GenBank) <a href="#">hypothetical protein</a>                                            | No COG                              | 13.978   | 12.938   | 10.670   | 70.412   | 208.012  | 227.095  |
| <a href="#">AMK58_10935</a> | <a href="#">K07124 uncharacterized protein</a>   (GenBank) <a href="#">hypothetical protein</a>                                       | Hypothetical                        | 67.956   | 71.804   | 72.090   | 237.515  | 291.867  | 200.049  |
| <a href="#">AMK58_10940</a> | <a href="#">K17865 3-hydroxybutyryl-CoA dehydratase [EC:4.2.1.551]</a>   (GenBank) <a href="#">dehydratase</a>                        | dehydratase                         | 49.775   | 67.513   | 57.304   | 556.478  | 349.003  | 171.648  |
| <a href="#">AMK58_10945</a> | <a href="#">K11753 riboflavin kinase / FMN adenylyltransferase [EC:2.7.1.26.2.7.21]</a>   (GenBank) <a href="#">bifunctional ri</a>   | Metabolism: Co-Factors and Vitamins | 9.489    | 11.338   | 15.999   | 49.995   | 466.158  | 105.817  |
| <a href="#">AMK58_10950</a> | <a href="#">K00762 orotate phosphoribosyltransferase [EC:2.4.2.101]</a>   (GenBank) <a href="#">orotate phosphoribosyltransferase</a> | Metabolism: Nucleotide              | 49.056   | 60.280   | 67.484   | 316.216  | 435.264  | 91.945   |
| <a href="#">AMK58_10955</a> | <a href="#">K01870 isoleucyl-tRNA synthetase [EC:6.1.1.51]</a>   (GenBank) <a href="#">ileS: isoleucine--tRNA ligase</a>              | tRNA synthesis/modification         | 12.930   | 21.022   | 16.123   | 38.729   | 47.938   | 41.197   |
| <a href="#">AMK58_10960</a> | <a href="#">K03101 signal peptidase II [EC:3.4.23.36]</a>   (GenBank) <a href="#">signal peptidase II</a>                             | Peptidase                           | 57.174   | 61.715   | 71.036   | 403.212  | 128.802  | 195.358  |
| <a href="#">AMK58_10965</a> | <a href="#">no KO assigned</a>   (GenBank) <a href="#">hypothetical protein</a>                                                       | Hypothetical                        | 228.963  | 183.823  | 222.259  | 177.173  | 73.886   | 316.430  |
| <a href="#">AMK58_10970</a> | <a href="#">K07263 zinc protease [EC:3.4.24.-1]</a>   (GenBank) <a href="#">zinc protease</a>                                         | Peptidases                          | 288.015  | 250.887  | 283.584  | 329.905  | 322.097  | 473.735  |
| <a href="#">AMK58_10975</a> | <a href="#">K07263 zinc protease [EC:3.4.24.-1]</a>   (GenBank) <a href="#">zinc protease</a>                                         | Peptidase                           | 51.825   | 35.601   | 40.433   | 42.330   | 38.057   | 102.977  |
| <a href="#">AMK58_10980</a> | <a href="#">no KO assigned</a>   (GenBank) <a href="#">hypothetical protein</a>                                                       | Hypothetical                        | 928.240  | 948.663  | 842.318  | 633.677  | 1081.309 | 504.293  |
| <a href="#">AMK58_10985</a> | <a href="#">K01810 glucose-6-phosphate isomerase [EC:5.3.1.91]</a>   (GenBank) <a href="#">pgi: glucose-6-phosphate isomerase</a>     | Metabolism: Carbohydrate            | 74.236   | 66.000   | 64.562   | 131.998  | 112.004  | 114.660  |
| <a href="#">AMK58_10990</a> | <a href="#">no KO assigned</a>   (GenBank) <a href="#">hypothetical protein</a>                                                       | Hypothetical                        | 370.940  | 407.774  | 348.461  | 471.850  | 508.682  | 468.891  |
| <a href="#">AMK58_10995</a> | <a href="#">no KO assigned</a>   (GenBank) <a href="#">hypothetical protein</a>                                                       | Hypothetical                        | 27.814   | 32.584   | 35.435   | 37.015   | 91.137   | 100.470  |
| <a href="#">AMK58_11000</a> | <a href="#">no KO assigned</a>   (GenBank) <a href="#">hypothetical protein</a>                                                       | Hypothetical                        | 387.066  | 355.242  | 376.765  | 213.170  | 271.379  | 440.156  |
| <a href="#">AMK58_11005</a> | <a href="#">K03572 DNA mismatch repair protein MutL</a>   (GenBank) <a href="#">DNA mismatch repair protein MutL</a>                  | DNA Repair and Replication          | 8.685    | 9.156    | 9.775    | 33.190   | 17.227   | 95.986   |
| <a href="#">AMK58_11010</a> | <a href="#">no KO assigned</a>   (GenBank) <a href="#">pseudogene</a>                                                                 | Pseudogene                          | 30.225   | 35.489   | 44.519   | 116.783  | 63.432   | 205.423  |
| <a href="#">AMK58_11015</a> | <a href="#">no KO assigned</a>   (GenBank) <a href="#">hypothetical protein</a>                                                       | Hypothetical                        | 305.922  | 288.974  | 347.407  | 384.211  | 364.647  | 556.206  |
| <a href="#">AMK58_11020</a> | <a href="#">no KO assigned</a>   (GenBank) <a href="#">hypothetical protein</a>                                                       | Hypothetical                        | 427.196  | 541.234  | 595.598  | 1207.192 | 2689.530 | 724.577  |
| <a href="#">AMK58_11025</a> | <a href="#">K14393 cation/acetate symporter</a>   (GenBank) <a href="#">sodium:solute symporter</a>                                   | Transport: Ion                      | 3.432    | 7.791    | 7.048    | 77.507   | 57.168   | 118.571  |
| <a href="#">AMK58_11030</a> | <a href="#">K07182 CBS domain-containing protein</a>   (GenBank) <a href="#">hypothetical protein</a>                                 | No COG                              | 194.175  | 204.562  | 223.182  | 20.317   | 79.607   | 46.175   |
| <a href="#">AMK58_11035</a> | <a href="#">no KO assigned</a>   (GenBank) <a href="#">hypothetical protein</a>                                                       | Hypothetical                        | 261.512  | 154.706  | 108.465  | 49.062   | 98.071   | 234.706  |
| <a href="#">AMK58_11040</a> | <a href="#">K01485 cytosine deaminase [EC:3.5.4.11]</a>   (GenBank) <a href="#">amidohydrolase</a>                                    | Metabolism: Nucleotide              | 465.575  | 260.825  | 206.624  | 139.573  | 288.544  | 298.756  |
| <a href="#">AMK58_11045</a> | <a href="#">no KO assigned</a>   (GenBank) <a href="#">hypothetical protein</a>                                                       | Hypothetical                        | 156.578  | 99.711   | 113.676  | 499.971  | 315.504  | 1073.174 |
| <a href="#">AMK58_11050</a> | <a href="#">no KO assigned</a>   (GenBank) <a href="#">GntR family transcriptional regulator</a>                                      | Transcription                       | 40.530   | 50.276   | 45.394   | 49.461   | 51.542   | 208.615  |

|                             |                                                                                                                      |                                     |         |         |         |          |         |          |
|-----------------------------|----------------------------------------------------------------------------------------------------------------------|-------------------------------------|---------|---------|---------|----------|---------|----------|
| <a href="#">AMK58_11055</a> | <a href="#">K02049</a> Nit/TauT family transport system ATP-binding protein I (GenBank) nitrate ABC transporter ATP  | Transport: Nit/TauT                 | 9.623   | 11.155  | 11.607  | 186.042  | 100.092 | 337.874  |
| <a href="#">AMK58_11060</a> | <a href="#">K02050</a> Nit/TauT family transport system permease protein I (GenBank) ABC transporter permease        | Transport: Nit/TauT                 | 5.631   | 2.804   | 4.462   | 44.842   | 34.990  | 104.872  |
| <a href="#">AMK58_11065</a> | <a href="#">K02051</a> Nit/TauT family transport system substrate-binding protein I (GenBank) hypothetical protein   | Transport: Nit/TauT                 | 6.999   | 9.756   | 7.431   | 62.656   | 35.531  | 166.674  |
| <a href="#">AMK58_11070</a> | <a href="#">no KO assigned I (GenBank) gliding motility-associated lipoprotein GldK</a>                              | Motility                            | 3.190   | 6.629   | 5.275   | 185.408  | 27.281  | 201.005  |
| <a href="#">AMK58_11075</a> | <a href="#">K01130</a> arylsulfatase [EC:3.1.6.11] (GenBank) arylsulfatase                                           | Metabolism: Lipid                   | 2.403   | 1.267   | 3.091   | 39.576   | 21.927  | 128.130  |
| <a href="#">AMK58_11080</a> | <a href="#">K18292</a> (S)-citramalyl-CoA lyase [EC:4.1.3.251] (GenBank) hypothetical protein                        | Metabolism: Carbohydrate            | 8.317   | 10.590  | 8.686   | 80.728   | 40.154  | 266.640  |
| <a href="#">AMK58_11085</a> | <a href="#">no KO assigned I (GenBank) cytosine deaminase</a>                                                        | No COG                              | 4.854   | 7.961   | 9.322   | 117.304  | 17.440  | 167.875  |
| <a href="#">AMK58_11090</a> | <a href="#">no KO assigned I (GenBank) alpha/beta hydrolase</a>                                                      | hydrolase                           | 42.099  | 52.952  | 49.659  | 324.160  | 103.715 | 505.287  |
| <a href="#">AMK58_11095</a> | <a href="#">no KO assigned I (GenBank) hydrolase</a>                                                                 | hydrolase                           | 9.746   | 7.381   | 13.313  | 220.661  | 25.151  | 206.846  |
| <a href="#">AMK58_11100</a> | <a href="#">no KO assigned I (GenBank) GntR family transcriptional regulator</a>                                     | Transcription                       | 50.790  | 35.759  | 66.828  | 201.129  | 71.314  | 320.793  |
| <a href="#">AMK58_11105</a> | <a href="#">no KO assigned I (GenBank) NADP-dependent oxidoreductase</a>                                             | Energy                              | 8.260   | 5.640   | 11.893  | 79.038   | 17.509  | 76.597   |
| <a href="#">AMK58_11110</a> | <a href="#">no KO assigned I (GenBank) hypothetical protein</a>                                                      | Hypothetical                        | 59.276  | 57.266  | 70.750  | 100.353  | 88.461  | 355.521  |
| <a href="#">AMK58_11115</a> | <a href="#">no KO assigned I (GenBank) hypothetical protein</a>                                                      | Hypothetical                        | 225.696 | 291.197 | 239.388 | 281.122  | 258.926 | 450.806  |
| <a href="#">AMK58_11120</a> | <a href="#">no KO assigned I (GenBank) hypothetical protein</a>                                                      | Hypothetical                        | 46.000  | 52.718  | 47.657  | 85.647   | 142.191 | 128.902  |
| <a href="#">AMK58_11125</a> | <a href="#">no KO assigned I (GenBank) hypothetical protein</a>                                                      | Hypothetical                        | 40.757  | 46.222  | 41.861  | 30.343   | 16.227  | 85.644   |
| <a href="#">AMK58_11130</a> | <a href="#">K09458</a> 3-oxoacyl-[acyl-carrier-protein] synthase II [EC:2.3.1.1791] (GenBank) 3-oxoacyl-ACP synthase | Metabolism: Lipid                   | 23.344  | 26.003  | 18.716  | 57.242   | 15.233  | 77.873   |
| <a href="#">AMK58_11135</a> | <a href="#">K00059</a> 3-oxoacyl-[acyl-carrier-protein] reductase [EC:1.1.1.100] (GenBank) fabG; 3-ketoacyl-ACP re   | Biosynthesis: Lipid                 | 62.955  | 45.832  | 60.951  | 526.769  | 99.539  | 349.180  |
| <a href="#">AMK58_11140</a> | <a href="#">no KO assigned I (GenBank) hypothetical protein</a>                                                      | Hypothetical                        | 40.104  | 36.395  | 64.920  | 782.028  | 126.963 | 390.708  |
| <a href="#">AMK58_11145</a> | <a href="#">K00647</a> 3-oxoacyl-[acyl-carrier-protein] synthase I [EC:2.3.1.41] (GenBank) 3-oxoacyl-ACP synthase    | Metabolism: Lipid                   | 19.480  | 17.308  | 25.265  | 189.351  | 45.926  | 188.691  |
| <a href="#">AMK58_11150</a> | <a href="#">no KO assigned I (GenBank) hypothetical protein</a>                                                      | Hypothetical                        | 18.874  | 13.196  | 19.473  | 79.076   | 38.142  | 114.504  |
| <a href="#">AMK58_11155</a> | <a href="#">no KO assigned I (GenBank) hypothetical protein</a>                                                      | Hypothetical                        | 2.746   | 4.643   | 3.694   | 32.271   | 6.056   | 17.294   |
| <a href="#">AMK58_11160</a> | <a href="#">no KO assigned I (GenBank) hypothetical protein</a>                                                      | Hypothetical                        | 14.175  | 17.643  | 21.713  | 361.028  | 59.748  | 111.722  |
| <a href="#">AMK58_11165</a> | <a href="#">K07107</a> acyl-CoA thioester hydrolase [EC:3.1.2.-1] (GenBank) thioesterase                             | Hydrolase                           | 32.939  | 23.048  | 38.091  | 173.714  | 44.364  | 93.283   |
| <a href="#">AMK58_11170</a> | <a href="#">no KO assigned I (GenBank) hypothetical protein</a>                                                      | Hypothetical                        | 16.673  | 14.963  | 16.873  | 251.331  | 19.947  | 141.531  |
| <a href="#">AMK58_11175</a> | <a href="#">no KO assigned I (GenBank) hypothetical protein</a>                                                      | Hypothetical                        | 26.656  | 23.814  | 23.924  | 256.961  | 18.482  | 190.581  |
| <a href="#">AMK58_11180</a> | <a href="#">K02078</a> acyl carrier protein I (GenBank) acyl carrier protein                                         | Biosynthesis: Lipid                 | 42.327  | 23.524  | 29.482  | 76.478   | 30.981  | 205.828  |
| <a href="#">AMK58_11185</a> | <a href="#">K02078</a> acyl carrier protein I (GenBank) acyl carrier protein                                         | Biosynthesis: Lipid                 | 44.069  | 60.972  | 53.369  | 1042.712 | 102.722 | 567.370  |
| <a href="#">AMK58_11190</a> | <a href="#">no KO assigned I (GenBank) hypothetical protein</a>                                                      | Hypothetical                        | 6.494   | 5.543   | 8.821   | 69.804   | 12.341  | 43.159   |
| <a href="#">AMK58_11195</a> | <a href="#">no KO assigned I (GenBank) hypothetical protein</a>                                                      | Hypothetical                        | 43.419  | 44.567  | 35.281  | 23.060   | 25.800  | 37.778   |
| <a href="#">AMK58_11200</a> | <a href="#">no KO assigned I (GenBank) hypothetical protein</a>                                                      | Hypothetical                        | 77.749  | 54.961  | 66.871  | 60.422   | 52.036  | 158.498  |
| <a href="#">AMK58_11205</a> | <a href="#">no KO assigned I (GenBank) hypothetical protein</a>                                                      | Hypothetical                        | 8.554   | 2.621   | 9.385   | 145.438  | 42.652  | 115.727  |
| <a href="#">AMK58_11210</a> | <a href="#">no KO assigned I (GenBank) excinuclease ABC subunit A</a>                                                | No COG                              | 39.773  | 40.186  | 41.710  | 305.959  | 58.185  | 160.811  |
| <a href="#">AMK58_11215</a> | <a href="#">no KO assigned I (GenBank) TetR family transcriptional regulator</a>                                     | Transcription                       | 48.864  | 38.925  | 42.503  | 187.399  | 24.615  | 150.532  |
| <a href="#">AMK58_11220</a> | <a href="#">K09951</a> CRISPR-associated protein Cas2 I (GenBank) CRISPR-associated protein Cas2                     | Defense                             | 134.805 | 131.745 | 130.547 | 569.601  | 132.352 | 538.200  |
| <a href="#">AMK58_11225</a> | <a href="#">K15342</a> CRISPR-associated protein Cas I I (GenBank) type I-C CRISPR-associated endonuclease Cas I     | DNA Repair and Replication          | 163.984 | 128.181 | 104.974 | 37.129   | 45.495  | 121.841  |
| <a href="#">AMK58_11230</a> | <a href="#">K07464</a> CRISPR-associated exonuclease Cas4 [EC:3.1.12.11] (GenBank) CRISPR-associated protein Cas4    | Defense                             | 54.873  | 49.704  | 52.174  | 121.165  | 31.437  | 324.170  |
| <a href="#">AMK58_11235</a> | <a href="#">K19118</a> CRISPR-associated protein Csd2 I (GenBank) type I-C CRISPR-associated protein Cas7/Csd2       | Defense                             | 3.873   | 5.225   | 4.396   | 13.390   | 6.882   | 53.296   |
| <a href="#">AMK58_11240</a> | <a href="#">K19117</a> CRISPR-associated protein Csd1 I (GenBank) hypothetical protein                               | Defense                             | 4.170   | 2.009   | 5.756   | 55.594   | 10.736  | 74.285   |
| <a href="#">AMK58_11245</a> | <a href="#">K19119</a> CRISPR-associated protein Cas5 I (GenBank) type I-C CRISPR-associated protein Cas5            | Defense                             | 6.840   | 8.174   | 6.666   | 162.873  | 7.304   | 49.158   |
| <a href="#">AMK58_11250</a> | <a href="#">K07012</a> CRISPR-associated endonuclease/helicase Cas3 [EC:3.1.-.-3.6.4.-1] (GenBank) hypothetical pr   | DNA Repair and Replication          | 14.010  | 13.430  | 11.234  | 65.967   | 6.816   | 82.700   |
| <a href="#">AMK58_11255</a> | <a href="#">no KO assigned I (GenBank) serine hydrolase</a>                                                          | hydrolase                           | 23.134  | 28.544  | 25.941  | 419.359  | 59.073  | 358.260  |
| <a href="#">AMK58_11260</a> | <a href="#">K02030</a> polar amino acid transport system substrate-binding protein I (GenBank) hypothetical protein  | Transport: Amino Acid               | 32.928  | 27.239  | 21.515  | 150.876  | 44.985  | 197.764  |
| <a href="#">AMK58_11265</a> | <a href="#">K02858</a> 3,4-dihydroxy-2-butanone 4-phosphate synthase [EC:4.1.99.12] I (GenBank) ribB; 3,4-dihydroxy- | Metabolism: Co-Factors and Vitamins | 51.285  | 60.016  | 65.184  | 705.166  | 128.169 | 838.346  |
| <a href="#">AMK58_11270</a> | <a href="#">K05343</a> maltose alpha-D-glucosyltransferase / alpha-amylase [EC:5.4.99.16.3.2.1.11] (GenBank) trehal  | Metabolism: Carbohydrate            | 15.412  | 22.270  | 15.813  | 80.373   | 16.035  | 161.857  |
| <a href="#">AMK58_11275</a> | <a href="#">no KO assigned I (GenBank) hypothetical protein</a>                                                      | Hypothetical                        | 14.414  | 15.993  | 18.697  | 80.128   | 24.187  | 160.576  |
| <a href="#">AMK58_11280</a> | <a href="#">K08316</a> 16S rRNA (guanine966-N2)-methyltransferase [EC:2.1.1.171] I (GenBank) 16S rRNA (guanine9      | Ribosome                            | 70.470  | 82.455  | 87.880  | 119.889  | 128.572 | 148.723  |
| <a href="#">AMK58_11285</a> | <a href="#">K06178</a> 23S rRNA pseudouridine2605 synthase [EC:5.4.99.22] I (GenBank) pseudouridine synthase         | Ribosome                            | 9.868   | 17.096  | 13.604  | 184.392  | 84.296  | 269.649  |
| <a href="#">AMK58_11290</a> | <a href="#">K09165</a> uncharacterized protein I (GenBank) docetin flavoprotein                                      | No COG                              | 123.958 | 96.447  | 137.595 | 1058.070 | 196.363 | 1244.055 |
| <a href="#">AMK58_11295</a> | <a href="#">no KO assigned I (GenBank) CMP deaminase</a>                                                             | enzyme                              | 17.258  | 30.140  | 23.731  | 96.031   | 36.411  | 19.450   |
| <a href="#">AMK58_11300</a> | <a href="#">K07075</a> uncharacterized protein I (GenBank) hypothetical protein                                      | Hypothetical                        | 329.809 | 422.606 | 341.643 | 449.354  | 335.599 | 476.844  |
| <a href="#">AMK58_11305</a> | <a href="#">K01945</a> phosphoribosylamine-glycine ligase [EC:6.3.4.131] (GenBank) phosphoribosylamine-glycine li    | Metabolism: Nucleotide              | 1.411   | 1.124   | 2.505   | 49.021   | 16.496  | 44.053   |
| <a href="#">AMK58_11310</a> | <a href="#">K03601</a> exodeoxyribonuclease VII large subunit [EC:3.1.11.61] (GenBank) exodeoxyribonuclease VII lar  | DNA Repair and Replication          | 3.190   | 6.205   | 5.149   | 64.497   | 7.172   | 33.433   |
| <a href="#">AMK58_11315</a> | <a href="#">K08714</a> voltage-gated sodium channel I (GenBank) hypothetical protein                                 | Transport: Ion                      | 11.788  | 6.629   | 13.450  | 55.362   | 11.380  | 62.886   |
| <a href="#">AMK58_11320</a> | <a href="#">K01465</a> dihydroorotase [EC:3.5.2.31] (GenBank) dihydroorotase                                         | Metabolism: Nucleotide              | 88.720  | 98.360  | 100.661 | 245.653  | 52.175  | 208.107  |
| <a href="#">AMK58_11325</a> | <a href="#">K01892</a> histidyl-tRNA synthetase [EC:6.1.1.211] (GenBank) histidine--tRNA ligase                      | tRNA synthesis/modification         | 37.040  | 41.258  | 45.877  | 197.506  | 53.026  | 141.626  |
| <a href="#">AMK58_11330</a> | <a href="#">no KO assigned I (GenBank) hypothetical protein</a>                                                      | Hypothetical                        | 49.788  | 34.928  | 61.086  | 61.135   | 28.900  | 94.199   |
| <a href="#">AMK58_11335</a> | <a href="#">no KO assigned I (GenBank) glycosyl transferase family 51</a>                                            | Glycosyl Transferase                | 24.719  | 20.312  | 28.485  | 65.635   | 20.232  | 53.038   |
| <a href="#">AMK58_11340</a> | <a href="#">no KO assigned I (GenBank) hypothetical protein</a>                                                      | Hypothetical                        | 473.975 | 504.667 | 462.261 | 723.550  | 338.123 | 1125.743 |
| <a href="#">AMK58_11345</a> | <a href="#">K03594</a> bacterioferritin [EC:1.16.3.11] (GenBank) bacterioferritin                                    | Metabolism: Co-Factors and Vitamins | 35.789  | 33.362  | 48.992  | 567.141  | 63.624  | 324.805  |
| <a href="#">AMK58_11350</a> | <a href="#">no KO assigned I (GenBank) hypothetical protein</a>                                                      | Hypothetical                        | 214.162 | 293.220 | 248.364 | 1120.903 | 103.039 | 945.924  |
| <a href="#">AMK58_11355</a> | <a href="#">K14228</a> tRNA Leu I (GenBank) tRNA-Leu                                                                 | tRNA synthesis/modification         | 585.195 | 680.299 | 816.796 | 463.388  | 610.799 | 851.378  |
| <a href="#">AMK58_11360</a> | <a href="#">no KO assigned I (GenBank) hypothetical protein</a>                                                      | Hypothetical                        | 580.765 | 635.141 | 613.500 | 117.354  | 621.824 | 528.489  |
| <a href="#">AMK58_11365</a> | <a href="#">no KO assigned I (GenBank) molybdopterin-binding protein</a>                                             | No COG                              | 39.267  | 48.410  | 34.373  | 136.512  | 140.997 | 336.665  |
| <a href="#">AMK58_11370</a> | <a href="#">K06206</a> sugar fermentation stimulation protein A I (GenBank) XRE family transcriptional regulator     | transcription                       | 13.619  | 7.938   | 11.844  | 6.229    | 44.244  | 57.136   |
| <a href="#">AMK58_11375</a> | <a href="#">K01265</a> methionyl aminopeptidase [EC:3.4.11.18] I (GenBank) methionine aminopeptidase                 | Peptidase                           | 195.113 | 176.069 | 191.865 | 66.313   | 203.650 | 153.193  |
| <a href="#">AMK58_11380</a> | <a href="#">K03630</a> DNA repair protein RadC I (GenBank) DNA repair protein RadC                                   | DNA Repair and Replication          | 74.241  | 85.471  | 81.757  | 193.453  | 115.273 | 271.039  |
| <a href="#">AMK58_11385</a> | <a href="#">no KO assigned I (GenBank) Tellurite resistance protein TerB</a>                                         | defense                             | 135.285 | 120.559 | 140.791 | 491.888  | 263.241 | 334.701  |

|             |                                                                                                       |                                     |          |          |          |          |          |          |
|-------------|-------------------------------------------------------------------------------------------------------|-------------------------------------|----------|----------|----------|----------|----------|----------|
| AMK58_11390 | no KO assigned   (GenBank) hypothetical protein.                                                      | Hypothetical                        | 63.356   | 50.633   | 61.233   | 36.708   | 77.426   | 63.976   |
| AMK58_11395 | K01756 adenylosuccinate lyase [EC:4.3.2.2]   (GenBank) adenylosuccinate lyase.                        | Metabolism                          | 50.728   | 44.652   | 50.809   | 106.247  | 89.049   | 132.281  |
| AMK58_11400 | no KO assigned   (GenBank) aldolase.                                                                  | enzyme                              | 95.804   | 83.377   | 125.878  | 300.625  | 202.656  | 300.085  |
| AMK58_11405 | no KO assigned   (GenBank) hypothetical protein.                                                      | Hypothetical                        | 181.612  | 170.638  | 180.648  | 654.566  | 312.142  | 765.881  |
| AMK58_11410 | K01923 phosphoribosylaminoimidazole-succinocarboxamide synthase [EC:6.3.2.6]   (GenBank) phospho      | Metabolism: Nucleotide              | 354.361  | 303.526  | 353.182  | 272.218  | 536.723  | 350.604  |
| AMK58_11415 | K01952 phosphoribosylformylglycinamide synthase [EC:6.3.5.31]   (GenBank) phosphoribosylformylgly     | Metabolism: Nucleotide              | 276.529  | 360.189  | 308.405  | 227.594  | 818.799  | 315.094  |
| AMK58_11420 | K01247 DNA-3-methyladenine glycosylase II [EC:3.2.2.21]   (GenBank) DNA glycosylase.                  | DNA Repair and Replication          | 30.361   | 32.075   | 31.860   | 312.964  | 325.250  | 104.545  |
| AMK58_11425 | no KO assigned   (GenBank) molybdenum cofactor sulfuryase.                                            | No COG                              | 429.026  | 486.430  | 426.441  | 212.487  | 673.563  | 328.999  |
| AMK58_11430 | no KO assigned   (GenBank) transporter.                                                               | Transport                           | 85.452   | 99.031   | 92.604   | 37.374   | 93.390   | 62.149   |
| AMK58_11435 | K03566 LysR family transcriptional regulator: glycine cleavage system transcriptional activator   (G  | Transcription                       | 58.175   | 74.997   | 61.474   | 167.791  | 115.459  | 132.170  |
| AMK58_11440 | K01952 phosphoribosylformylglycinamide synthase [EC:6.3.5.31]   (GenBank) phosphoribosylformylgly     | Metabolism: Nucleotide              | 40.015   | 42.067   | 49.150   | 254.666  | 68.722   | 109.562  |
| AMK58_11445 | K01952 phosphoribosylformylglycinamide synthase [EC:6.3.5.31]   (GenBank) phosphoribosylformylgly     | Metabolism: Nucleotide              | 6.384    | 8.623    | 8.181    | 111.396  | 18.657   | 36.085   |
| AMK58_11450 | no KO assigned   (GenBank) ATP-binding protein.                                                       | Metabolism: Nucleotide              | 40.358   | 48.224   | 63.315   | 1173.145 | 201.305  | 704.492  |
| AMK58_11455 | K07390 monothiol glutaredoxin   (GenBank) glutaredoxin.                                               | Chaperone                           | 801.855  | 846.030  | 756.352  | 339.547  | 500.998  | 436.604  |
| AMK58_11460 | no KO assigned   (GenBank) hypothetical protein.                                                      | Hypothetical                        | 1818.348 | 1669.538 | 1695.027 | 1039.854 | 818.749  | 776.596  |
| AMK58_11465 | K05786 chloramphenicol-sensitive protein RarD   (GenBank) transporter.                                | Transport                           | 148.631  | 180.657  | 151.405  | 56.512   | 386.077  | 92.597   |
| AMK58_11470 | no KO assigned   (GenBank) transcriptional regulator.                                                 | Transcription                       | 941.448  | 1018.178 | 889.904  | 36.860   | 1636.830 | 158.538  |
| AMK58_11475 | K10680 N-ethylmaleimide reductase [EC:1.--.1]   (GenBank) alkene reductase.                           | Metabolism                          | 2.413    | 4.586    | 4.797    | 66.990   | 152.612  | 68.440   |
| AMK58_11480 | K02986 small subunit ribosomal protein S4   (GenBank) 30S ribosomal protein S4.                       | Ribosome                            | 515.208  | 542.223  | 493.608  | 183.547  | 777.833  | 331.150  |
| AMK58_11485 | no KO assigned   (GenBank) nitrogen fixation protein CowN.                                            | Nitrogen                            | 138.604  | 168.052  | 167.833  | 508.401  | 532.917  | 414.680  |
| AMK58_11490 | no KO assigned   (GenBank) hypothetical protein.                                                      | Hypothetical                        | 104.590  | 91.693   | 122.145  | 1209.922 | 2236.273 | 1195.435 |
| AMK58_11495 | no KO assigned   (GenBank) response regulator.                                                        | Signal Transduction                 | 1460.189 | 1182.291 | 1305.004 | 110.395  | 1979.832 | 285.549  |
| AMK58_11500 | K02533 tRNA/rRNA methyltransferase [EC:2.1.1.-]   (GenBank) rRNA methyltransferase.                   | tRNA synthesis/modification         | 17.745   | 22.517   | 13.139   | 19.774   | 32.126   | 131.491  |
| AMK58_11505 | K01649 2-isopropylmalate synthase [EC:2.3.3.13]   (GenBank) transferase.                              | Metabolism                          | 8.147    | 8.563    | 6.312    | 19.301   | 10.430   | 44.488   |
| AMK58_11510 | no KO assigned   (GenBank) hypothetical protein.                                                      | Hypothetical                        | 45.622   | 62.900   | 70.072   | 452.083  | 90.400   | 164.608  |
| AMK58_11515 | no KO assigned   (GenBank) hypothetical protein.                                                      | Hypothetical                        | 35.249   | 27.435   | 36.221   | 98.161   | 30.098   | 97.156   |
| AMK58_11520 | no KO assigned   (GenBank) preQ0 transporter.                                                         | transport                           | 585.065  | 510.238  | 607.036  | 553.873  | 269.845  | 899.606  |
| AMK58_11525 | K11941 glucans biosynthesis protein C [EC:2.1.-.-]   (GenBank) hypothetical protein.                  | Transferase                         | 87.493   | 102.128  | 104.251  | 88.748   | 109.034  | 80.568   |
| AMK58_11530 | K01883 cysteinyl-tRNA synthetase [EC:6.1.1.16]   (GenBank) cysteine--tRNA ligase.                     | tRNA synthesis/modification         | 141.254  | 147.409  | 144.946  | 276.212  | 126.882  | 191.202  |
| AMK58_11535 | K01885 glutamyl-tRNA synthetase [EC:6.1.1.17]   (GenBank) glutamine--tRNA ligase.                     | tRNA synthesis/modification         | 431.779  | 364.907  | 390.154  | 74.456   | 91.944   | 86.959   |
| AMK58_11540 | no KO assigned   (GenBank) indolepyruvate/phenylpyruvate decarboxylase.                               | IAA Biosynthesis                    | 8.944    | 10.599   | 14.407   | 211.594  | 53.174   | 106.170  |
| AMK58_11545 | no KO assigned   (GenBank) hypothetical protein.                                                      | Hypothetical                        | 300.563  | 261.423  | 299.511  | 349.980  | 116.037  | 392.747  |
| AMK58_11550 | K01916 NAD+ synthase [EC:6.3.1.5]   (GenBank) NAD synthetase.                                         | Energy                              | 63.919   | 59.519   | 66.790   | 133.450  | 38.253   | 141.399  |
| AMK58_11555 | no KO assigned   (GenBank) hypothetical protein.                                                      | Hypothetical                        | 614.480  | 698.921  | 839.803  | 222.760  | 65.661   | 144.541  |
| AMK58_11560 | no KO assigned   (GenBank) hypothetical protein.                                                      | Hypothetical                        | 83.448   | 89.028   | 115.355  | 81.509   | 30.150   | 127.700  |
| AMK58_11565 | no KO assigned   (GenBank) F-box protein SKIP8.                                                       | No COG                              | 110.220  | 144.671  | 141.054  | 871.702  | 155.803  | 648.325  |
| AMK58_11570 | K18988 D-alanyl-D-alanine-carboxypeptidase / D-alanyl-D-alanine-endopeptidase [EC:3.4.-.-]   (GenBan  | Cell Wall                           | 1.746    | 2.454    | 5.566    | 261.781  | 147.752  | 223.968  |
| AMK58_11575 | no KO assigned   (GenBank) hypothetical protein.                                                      | Hypothetical                        | 668.774  | 903.339  | 842.437  | 74.287   | 96.198   | 116.782  |
| AMK58_11580 | K20534 polvisoprenyl-phosphate glycosyltransferase [EC:2.4.-.-]   (GenBank) glycosyl transferase fam. | Glycosyl Transferase                | 181.241  | 207.577  | 230.036  | 86.982   | 39.649   | 58.541   |
| AMK58_11585 | no KO assigned   (GenBank) chemotaxis protein.                                                        | Chemotaxis                          | 2.711    | 1.799    | 5.670    | 112.804  | 33.245   | 58.201   |
| AMK58_11590 | no KO assigned   (GenBank) hypothetical protein.                                                      | Hypothetical                        | 107.243  | 92.825   | 110.075  | 347.469  | 118.842  | 238.419  |
| AMK58_11595 | K01999 branched-chain amino acid transport system substrate-binding protein   (GenBank) ABC transpor  | Transport: Amino Acid               | 52.082   | 46.488   | 57.905   | 99.090   | 73.236   | 156.427  |
| AMK58_11600 | K01997 branched-chain amino acid transport system permease protein   (GenBank) ABC transporter perme  | Transport: Amino Acid               | 112.474  | 119.373  | 115.622  | 402.540  | 76.450   | 305.643  |
| AMK58_11605 | K06920 7-cyano-7-deazaguanine synthase [EC:6.3.4.20]   (GenBank) 7-cyano-7-deazaguanine synthase.     | Metabolism: Co-Factors and Vitamins | 51.318   | 31.179   | 35.892   | 130.960  | 19.358   | 153.403  |
| AMK58_11610 | no KO assigned   (GenBank) hypothetical protein.                                                      | Hypothetical                        | 158.844  | 118.425  | 116.138  | 139.820  | 28.905   | 168.901  |
| AMK58_11615 | no KO assigned   (GenBank) hypothetical protein.                                                      | Hypothetical                        | 71.288   | 43.696   | 50.941   | 161.714  | 18.720   | 108.920  |
| AMK58_11620 | K01998 branched-chain amino acid transport system permease protein   (GenBank) ABC transporter perme  | Transport: Amino Acid               | 15.550   | 14.183   | 16.929   | 144.695  | 31.488   | 167.414  |
| AMK58_11625 | K01995 branched-chain amino acid transport system ATP-binding protein   (GenBank) ABC transporter A   | Transport: Amino Acid               | 360.034  | 336.422  | 319.724  | 271.592  | 118.521  | 455.735  |
| AMK58_11630 | K01996 branched-chain amino acid transport system ATP-binding protein   (GenBank) ABC transporter A   | Transport: Amino Acid               | 64.677   | 76.251   | 80.190   | 401.768  | 112.054  | 384.947  |
| AMK58_11635 | K01432 arylformamidase [EC:3.5.1.9]   (GenBank) hypothetical protein.                                 | Metabolism                          | 42.513   | 38.613   | 41.377   | 317.061  | 62.316   | 200.434  |
| AMK58_11640 | K14233 tRNA Ser   (GenBank) tRNA-Ser.                                                                 | tRNA synthesis/modification         | 143.944  | 176.820  | 122.794  | 870.398  | 244.968  | 793.372  |
| AMK58_11645 | K02888 large subunit ribosomal protein L21   (GenBank) 50S ribosomal protein L21.                     | Ribosome                            | 38.074   | 27.296   | 39.821   | 453.916  | 42.248   | 224.186  |
| AMK58_11650 | K02899 large subunit ribosomal protein L27   (GenBank) 50S ribosomal protein L27.                     | Ribosome                            | 103.716  | 95.929   | 110.168  | 696.411  | 116.094  | 373.025  |
| AMK58_11655 | K03979 GTPase [EC:3.6.5.-]   (GenBank) obgE: GTPase Obg.                                              | Hydrolase                           | 2.374    | 4.137    | 4.044    | 10.733   | 9.562    | 18.620   |
| AMK58_11660 | K00931 glutamate 5-kinase [EC:2.7.2.11]   (GenBank) glutamate 5-kinase.                               | Metabolism                          | 597.238  | 636.374  | 532.438  | 30.544   | 1012.456 | 116.141  |
| AMK58_11665 | no KO assigned   (GenBank) haloacid dehalogenase.                                                     | Dehydrogenase                       | 830.000  | 1014.178 | 890.531  | 29.876   | 1749.912 | 219.615  |
| AMK58_11670 | no KO assigned   (GenBank) hypothetical protein.                                                      | Hypothetical                        | 167.079  | 142.422  | 164.825  | 344.826  | 366.676  | 472.347  |
| AMK58_11675 | no KO assigned   (GenBank) hypothetical protein.                                                      | Hypothetical                        | 38.007   | 39.211   | 42.750   | 138.304  | 46.135   | 51.593   |
| AMK58_11680 | K07090 uncharacterized protein   (GenBank) hypothetical protein.                                      | Hypothetical                        | 32.547   | 23.334   | 35.433   | 216.902  | 69.144   | 128.567  |
| AMK58_11685 | no KO assigned   (GenBank) cytochrome C.                                                              | Energy                              | 18.758   | 21.225   | 19.592   | 89.659   | 44.725   | 158.522  |
| AMK58_11690 | K00147 glutamate-5-semialdehyde dehydrogenase [EC:1.2.1.41]   (GenBank) proA: gamma-glutamyl phos     | Metabolism: Amino Acid              | 3.686    | 5.647    | 5.841    | 104.959  | 31.022   | 311.919  |
| AMK58_11695 | K00969 nicotinate-nucleotide adenylyltransferase [EC:2.7.7.18]   (GenBank) nicotinate-nucleotide ade. | Metabolism: Co-Factors and Vitamins | 18.024   | 19.898   | 25.334   | 270.310  | 39.859   | 264.324  |
| AMK58_11700 | K09710 ribosome-associated protein   (GenBank) ribosome-associated protein IOJAP.                     | Ribosome                            | 51.798   | 89.233   | 127.205  | 445.692  | 76.798   | 448.784  |
| AMK58_11705 | K00783 23S rRNA (pseudouridine1915-N3)-methyltransferase [EC:2.1.1.177]   (GenBank) 50S rRNA me       | Ribosome                            | 195.461  | 196.992  | 226.225  | 322.605  | 209.032  | 305.501  |
| AMK58_11710 | K15633 2,3-bisphosphoglycerate-independent phosphoglycerate mutase [EC:5.4.2.12]   (GenBank) 2,3-bis  | Metabolism                          | 84.118   | 104.854  | 95.344   | 99.942   | 229.082  | 86.174   |
| AMK58_11715 | no KO assigned   (GenBank) metallopeptidase.                                                          | Peptidase                           | 403.491  | 512.446  | 490.370  | 31.895   | 1100.939 | 236.303  |
| AMK58_11720 | K03797 carboxyl-terminal processing protease [EC:3.4.21.102]   (GenBank) peptidase S41.               | Peptidase                           | 107.793  | 182.759  | 161.802  | 84.020   | 540.809  | 147.389  |

|             |                                                                                                                                                                            |                                |          |          |          |          |          |          |
|-------------|----------------------------------------------------------------------------------------------------------------------------------------------------------------------------|--------------------------------|----------|----------|----------|----------|----------|----------|
| AMK58_11725 | <a href="#">K09798 uncharacterized protein   (GenBank) hypothetical protein</a>                                                                                            | Hypothetical                   | 355.621  | 346.535  | 352.494  | 281.932  | 794.644  | 290.346  |
| AMK58_11730 | <a href="#">K08311 putative (di)nucleoside polyphosphate hydrolase [EC:3.6.1.-]   (GenBank) RNA pyrophosphohydrolase</a>                                                   | Genetic Information Processing | 174.805  | 167.040  | 158.346  | 289.850  | 352.531  | 202.897  |
| AMK58_11735 | <a href="#">no KO assigned   (GenBank) hypothetical protein</a>                                                                                                            | Hypothetical                   | 459.020  | 474.288  | 472.423  | 226.347  | 302.429  | 303.087  |
| AMK58_11740 | <a href="#">K02114 F-type H+-transporting ATPase subunit epsilon   (GenBank) ATP synthase subunit epsilon</a>                                                              | Energy                         | 200.914  | 223.646  | 236.355  | 492.042  | 235.040  | 235.387  |
| AMK58_11745 | <a href="#">K02112 F-type H+-transporting ATPase subunit beta [EC:3.6.3.14]   (GenBank) ATP synthase subunit beta</a>                                                      | Energy                         | 36.911   | 42.698   | 40.452   | 41.222   | 59.446   | 61.047   |
| AMK58_11750 | <a href="#">K02115 F-type H+-transporting ATPase subunit gamma   (GenBank) ATP synthase F0F1 subunit gamma</a>                                                             | Energy                         | 123.113  | 131.519  | 130.106  | 176.202  | 251.566  | 245.078  |
| AMK58_11755 | <a href="#">K02111 F-type H+-transporting ATPase subunit alpha [EC:3.6.3.14]   (GenBank) ATP synthase subunit alpha</a>                                                    | Energy                         | 317.248  | 278.468  | 289.453  | 53.320   | 77.119   | 61.125   |
| AMK58_11760 | <a href="#">K02113 F-type H+-transporting ATPase subunit delta   (GenBank) ATP synthase subunit delta</a>                                                                  | Energy                         | 4631.642 | 3313.476 | 3812.860 | 299.902  | 949.310  | 454.988  |
| AMK58_11765 | <a href="#">no KO assigned   (GenBank) hypothetical protein</a>                                                                                                            | Hypothetical                   | 4912.871 | 3706.081 | 3752.380 | 296.340  | 979.955  | 783.462  |
| AMK58_11770 | <a href="#">no KO assigned   (GenBank) chemotaxis protein</a>                                                                                                              | Chemotaxis                     | 5704.409 | 4234.726 | 4768.734 | 446.971  | 1148.736 | 676.072  |
| AMK58_11775 | <a href="#">K04066 primosomal protein N' (replication factor Y) (superfamily II helicase) [EC:3.6.4.-]   (GenBank) primosomal protein N'</a>                               | DNA Repair and Replication     | 549.221  | 510.782  | 440.488  | 24.622   | 145.570  | 65.569   |
| AMK58_11780 | <a href="#">K00616 transaldolase [EC:2.2.1.2]   (GenBank) fructose-6-phosphate aldolase</a>                                                                                | Metabolism                     | 104.305  | 142.029  | 115.995  | 92.078   | 129.050  | 143.370  |
| AMK58_11785 | <a href="#">K09921 uncharacterized protein   (GenBank) hypothetical protein</a>                                                                                            | Hypothetical                   | 283.525  | 358.638  | 294.569  | 162.640  | 207.761  | 227.841  |
| AMK58_11790 | <a href="#">K03733 integrase/recombinase XerC   (GenBank) recombinase XerC</a>                                                                                             | DNA Repair and Replication     | 43.763   | 44.456   | 50.005   | 477.266  | 121.917  | 194.601  |
| AMK58_11795 | <a href="#">K00382 dihydroliipoamide dehydrogenase [EC:1.8.1.4]   (GenBank) dihydroliipoamide dehydrogenase</a>                                                            | Metabolism: Carbon             | 227.631  | 209.107  | 205.258  | 49.316   | 220.022  | 102.974  |
| AMK58_11800 | <a href="#">no KO assigned   (GenBank) hypothetical protein</a>                                                                                                            | Hypothetical                   | 183.020  | 186.166  | 209.356  | 227.060  | 254.674  | 205.567  |
| AMK58_11805 | <a href="#">K01561 haloacetate dehalogenase [EC:3.8.1.31]   (GenBank) alpha/beta hydrolase</a>                                                                             | Metabolism                     | 46.124   | 50.028   | 50.772   | 156.118  | 82.242   | 167.004  |
| AMK58_11810 | <a href="#">no KO assigned   (GenBank) entericidin</a>                                                                                                                     | Défense                        | 5001.379 | 4362.880 | 4630.822 | 1928.890 | 1075.907 | 1894.462 |
| AMK58_11815 | <a href="#">K03272 D-beta-D-heptose 7-phosphate kinase / D-beta-D-heptose 1-phosphate adenosyltransferase [EC:2.7.1.1]   (GenBank) D-beta-D-heptose 7-phosphate kinase</a> | Biosynthesis: polysaccharide   | 10.550   | 18.509   | 13.295   | 85.692   | 41.600   | 126.323  |
| AMK58_11820 | <a href="#">no KO assigned   (GenBank) hypothetical protein</a>                                                                                                            | Hypothetical                   | 199.610  | 275.874  | 230.929  | 535.749  | 232.952  | 442.673  |
| AMK58_11825 | <a href="#">no KO assigned   (GenBank) histidine kinase</a>                                                                                                                | Signal Transduction            | 6.507    | 4.921    | 14.018   | 30.782   | 88.507   | 53.996   |
| AMK58_11830 | <a href="#">no KO assigned   (GenBank) hypothetical protein</a>                                                                                                            | Hypothetical                   | 708.576  | 833.581  | 869.422  | 1606.412 | 1379.078 | 1069.235 |
| AMK58_11835 | <a href="#">K00598 trans-aconitate 2-methyltransferase [EC:2.1.1.144]   (GenBank) trans-aconitate methyltransferase</a>                                                    | methyltransferase              | 69.638   | 75.645   | 86.377   | 142.045  | 56.394   | 124.451  |
| AMK58_11840 | <a href="#">no KO assigned   (GenBank) hypothetical protein</a>                                                                                                            | Hypothetical                   | 27.369   | 27.715   | 27.346   | 494.014  | 97.247   | 288.417  |
| AMK58_11845 | <a href="#">K03496 chromosome partitioning protein   (GenBank) chromosome partitioning protein ParA</a>                                                                    | Cell Cycle/Shape/Homeostasis   | 142.030  | 168.087  | 117.333  | 92.789   | 76.116   | 98.956   |
| AMK58_11850 | <a href="#">no KO assigned   (GenBank) hypothetical protein</a>                                                                                                            | Hypothetical                   | 57.977   | 80.973   | 71.663   | 119.925  | 61.022   | 32.396   |
| AMK58_11855 | <a href="#">no KO assigned   (GenBank) ubiquinone biosynthesis methyltransferase UbiE</a>                                                                                  | methyltransferase              | 16.210   | 14.026   | 19.027   | 109.621  | 79.042   | 66.968   |
| AMK58_11860 | <a href="#">K00927 phosphoglycerate kinase [EC:2.7.2.31]   (GenBank) pgk: phosphoglycerate kinase</a>                                                                      | Signal Transduction            | 36.515   | 52.575   | 47.894   | 120.860  | 55.938   | 69.594   |
| AMK58_11865 | <a href="#">K06187 recombination protein RecR   (GenBank) recombination protein RecR</a>                                                                                   | DNA Repair and Replication     | 192.415  | 179.012  | 218.416  | 478.913  | 416.757  | 320.554  |
| AMK58_11870 | <a href="#">K09747 uncharacterized protein   (GenBank) nucleoid-associated protein</a>                                                                                     | No COG                         | 275.781  | 216.560  | 205.367  | 501.575  | 570.415  | 398.835  |
| AMK58_11875 | <a href="#">K02343 DNA polymerase III subunit gamma/tau [EC:2.7.7.71]   (GenBank) DNA polymerase III subunit gamma</a>                                                     | DNA Repair and Replication     | 162.341  | 160.100  | 148.556  | 109.254  | 144.918  | 113.593  |
| AMK58_11880 | <a href="#">K08738 cytochrome c   (GenBank) cytochrome C</a>                                                                                                               | Energy                         | 226.455  | 259.872  | 242.389  | 230.064  | 607.379  | 246.993  |
| AMK58_11885 | <a href="#">K00979 3-deoxy-manno-octulosonate cytidylyltransferase (CMP-KDO synthetase) [EC:2.7.7.38]   (GenBank) 3-deoxy-manno-octulosonate cytidylyltransferase</a>      | Biosynthesis: polysaccharide   | 316.268  | 386.890  | 295.895  | 53.445   | 653.903  | 104.586  |
| AMK58_11890 | <a href="#">K04518 prephenate dehydratase [EC:4.2.1.51]   (GenBank) prephenate dehydratase</a>                                                                             | Biosynthesis: Amino Acid       | 156.782  | 154.479  | 167.020  | 334.634  | 431.192  | 245.598  |
| AMK58_11895 | <a href="#">K03426 NAD+ diphosphatase [EC:3.6.1.22]   (GenBank) NADH pyrophosphatase</a>                                                                                   | Energy                         | 12.437   | 10.615   | 14.239   | 24.991   | 83.739   | 52.840   |
| AMK58_11900 | <a href="#">no KO assigned   (GenBank) histidinol phosphate phosphatase</a>                                                                                                | phosphatase                    | 657.020  | 592.172  | 498.702  | 149.758  | 533.597  | 112.413  |
| AMK58_11905 | <a href="#">no KO assigned   (GenBank) hypothetical protein</a>                                                                                                            | Hypothetical                   | 62.372   | 49.320   | 61.048   | 318.228  | 61.603   | 162.663  |
| AMK58_11910 | <a href="#">K06188 aquaporin Z   (GenBank) porin</a>                                                                                                                       | Transport                      | 135.290  | 146.428  | 135.781  | 290.446  | 92.749   | 227.266  |
| AMK58_11915 | <a href="#">K13893 microcin C transport system substrate-binding protein   (GenBank) ABC transporter substrate-binding protein</a>                                         | Membrane transport             | 59.720   | 81.675   | 70.154   | 131.343  | 39.924   | 90.192   |
| AMK58_11920 | <a href="#">no KO assigned   (GenBank) hypothetical protein</a>                                                                                                            | Hypothetical                   | 41.876   | 34.769   | 42.463   | 133.375  | 47.213   | 94.907   |
| AMK58_11925 | <a href="#">K13893 microcin C transport system substrate-binding protein   (GenBank) hypothetical protein</a>                                                              | Transport                      | 19.698   | 16.483   | 21.047   | 49.593   | 52.577   | 51.345   |
| AMK58_11930 | <a href="#">K13894 microcin C transport system permease protein   (GenBank) microcin ABC transporter permease</a>                                                          | Transport                      | 21.706   | 13.685   | 43.247   | 115.868  | 53.211   | 142.714  |
| AMK58_11935 | <a href="#">K13895 microcin C transport system permease protein   (GenBank) ABC transporter permease</a>                                                                   | Transport                      | 133.694  | 146.881  | 146.665  | 320.146  | 355.823  | 421.137  |
| AMK58_11940 | <a href="#">K13896 microcin C transport system ATP-binding protein   (GenBank) microcin ABC transporter ATP-binding protein</a>                                            | Membrane transport             | 35.110   | 30.913   | 29.518   | 41.685   | 46.528   | 146.746  |
| AMK58_11945 | <a href="#">no KO assigned   (GenBank) hypothetical protein</a>                                                                                                            | Hypothetical                   | 425.849  | 387.453  | 374.203  | 506.318  | 825.945  | 923.192  |
| AMK58_11950 | <a href="#">K06181 23S rRNA pseudouridine2457 synthase [EC:5.4.99.20]   (GenBank) pseudouridine synthase</a>                                                               | Metabolism                     | 135.096  | 142.633  | 127.009  | 107.109  | 250.250  | 299.913  |
| AMK58_11955 | <a href="#">K12972 glyoxylate/hydroxypyruvate reductase A [EC:1.1.1.79]   (GenBank) glyoxylate/hydroxypyruvate reductase A</a>                                             | Metabolism                     | 83.721   | 88.956   | 74.014   | 237.068  | 175.292  | 296.842  |
| AMK58_11960 | <a href="#">no KO assigned   (GenBank) MarR family transcriptional regulator</a>                                                                                           | Transcription                  | 143.862  | 149.264  | 169.154  | 600.566  | 695.896  | 651.215  |
| AMK58_11965 | <a href="#">no KO assigned   (GenBank) hypothetical protein</a>                                                                                                            | Hypothetical                   | 105.018  | 75.187   | 81.697   | 120.913  | 822.413  | 570.201  |
| AMK58_11970 | <a href="#">no KO assigned   (GenBank) hypothetical protein</a>                                                                                                            | Hypothetical                   | 83.706   | 122.048  | 137.385  | 786.234  | 558.934  | 475.414  |
| AMK58_11975 | <a href="#">K02410 flagellar motor switch protein FljG   (GenBank) flagellar motor switch protein FljG</a>                                                                 | Motility                       | 101.902  | 91.922   | 98.239   | 192.467  | 432.942  | 193.152  |
| AMK58_11980 | <a href="#">K01255 leucyl aminopeptidase [EC:3.4.11.1]   (GenBank) cytochrome C oxidase subunit II</a>                                                                     | Energy                         | 28.068   | 32.288   | 36.633   | 99.250   | 187.434  | 84.546   |
| AMK58_11985 | <a href="#">K00799 glutathione S-transferase [EC:2.5.1.18]   (GenBank) glutathione S-transferase</a>                                                                       | Metabolism: Amino Acid         | 181.703  | 195.295  | 209.923  | 54.796   | 350.394  | 87.039   |
| AMK58_11990 | <a href="#">K07080 uncharacterized protein   (GenBank) immunogenic protein</a>                                                                                             | No COG                         | 242.856  | 236.901  | 314.479  | 13.713   | 156.593  | 50.189   |
| AMK58_11995 | <a href="#">K03192 urease accessory protein   (GenBank) hypothetical protein</a>                                                                                           | Enzyme                         | 292.383  | 278.312  | 259.222  | 154.134  | 120.891  | 435.543  |
| AMK58_12000 | <a href="#">no KO assigned   (GenBank) hypothetical protein</a>                                                                                                            | Hypothetical                   | 241.918  | 281.305  | 235.972  | 661.482  | 383.772  | 339.820  |
| AMK58_12005 | <a href="#">K14161 protein ImuB   (GenBank) DNA polymerase</a>                                                                                                             | DNA Repair and Replication     | 22.177   | 19.664   | 21.310   | 135.312  | 85.884   | 73.175   |
| AMK58_12010 | <a href="#">K14162 error-prone DNA polymerase [EC:2.7.7.71]   (GenBank) DNA polymerase</a>                                                                                 | DNA Repair and Replication     | 16.643   | 21.016   | 21.830   | 87.958   | 97.829   | 61.764   |
| AMK58_12015 | <a href="#">no KO assigned   (GenBank) protein tyrosine phosphatase</a>                                                                                                    | signal transduction            | 14.847   | 19.989   | 26.046   | 376.753  | 281.118  | 145.039  |
| AMK58_12020 | <a href="#">no KO assigned   (GenBank) hypothetical protein</a>                                                                                                            | Hypothetical                   | 12.900   | 12.111   | 19.800   | 142.931  | 158.879  | 55.879   |
| AMK58_12025 | <a href="#">K14160 protein ImuA   (GenBank) hypothetical protein</a>                                                                                                       | Hypothetical                   | 1.768    | 1.760    | 7.142    | 241.306  | 49.503   | 68.564   |
| AMK58_12030 | <a href="#">no KO assigned   (GenBank) hypothetical protein</a>                                                                                                            | Hypothetical                   | 12.478   | 12.090   | 23.622   | 435.658  | 411.944  | 337.434  |
| AMK58_12035 | <a href="#">no KO assigned   (GenBank) hypothetical protein</a>                                                                                                            | Hypothetical                   | 92.738   | 75.243   | 103.961  | 339.325  | 1755.055 | 276.029  |
| AMK58_12040 | <a href="#">no KO assigned   (GenBank) coproporphyrinogen III oxidase</a>                                                                                                  | enzyme                         | 31.876   | 35.208   | 27.252   | 58.846   | 33.823   | 78.986   |
| AMK58_12045 | <a href="#">K11209 GSH-dependent disulfide-bond oxidoreductase [EC:1.8.4.-]   (GenBank) glutathione S-transferase</a>                                                      | Oxidoreductase                 | 52.836   | 93.186   | 55.984   | 257.251  | 200.085  | 102.146  |
| AMK58_12050 | <a href="#">no KO assigned   (GenBank) hypothetical protein</a>                                                                                                            | Hypothetical                   | 402.020  | 362.456  | 393.137  | 365.877  | 2832.202 | 283.451  |
| AMK58_12055 | <a href="#">K02034 peptide/nickel transport system permease protein   (GenBank) NAD synthetase</a>                                                                         | Energy                         | 2.488    | 4.954    | 6.702    | 119.233  | 86.223   | 75.231   |

|             |                                                                                                      |                                     |          |          |          |         |          |          |
|-------------|------------------------------------------------------------------------------------------------------|-------------------------------------|----------|----------|----------|---------|----------|----------|
| AMK58_12060 | K02033 peptide/nickel transport system permease protein I (GenBank) diguanylate cyclase              | Quorum sensing                      | 64.548   | 79.374   | 79.249   | 303.049 | 142.433  | 238.137  |
| AMK58_12065 | K02035 peptide/nickel transport system substrate-binding protein I (GenBank) peptide ABC transporter | Quorum sensing                      | 149.448  | 174.261  | 178.410  | 66.054  | 86.752   | 91.784   |
| AMK58_12070 | no KO assigned I (GenBank) enoyl-CoA hydratase                                                       | hydratase                           | 71.093   | 85.319   | 81.174   | 80.469  | 58.450   | 64.627   |
| AMK58_12075 | no KO assigned I (GenBank) MFS transporter                                                           | Transport: MFS                      | 19.843   | 23.610   | 24.703   | 81.093  | 37.520   | 61.748   |
| AMK58_12080 | no KO assigned I (GenBank) hypothetical protein                                                      | Hypothetical                        | 160.941  | 202.892  | 184.377  | 894.659 | 407.173  | 682.746  |
| AMK58_12085 | no KO assigned I (GenBank) LysR family transcriptional regulator                                     | Transcription                       | 216.195  | 220.822  | 189.539  | 208.239 | 385.063  | 415.310  |
| AMK58_12090 | no KO assigned I (GenBank) hypothetical protein                                                      | Hypothetical                        | 62.204   | 79.635   | 59.496   | 386.369 | 216.417  | 256.813  |
| AMK58_12095 | no KO assigned I (GenBank) universal stress protein UspA                                             | Stress Response                     | 91.527   | 115.392  | 109.363  | 305.257 | 341.853  | 267.175  |
| AMK58_12100 | no KO assigned I (GenBank) hypothetical protein                                                      | Hypothetical                        | 2.561    | 3.309    | 4.015    | 22.626  | 21.943   | 23.879   |
| AMK58_12105 | K00799 glutathione S-transferase [EC:2.5.1.181] (GenBank) glutathione S-transferase                  | Metabolism: amino acids             | 836.292  | 933.766  | 884.570  | 427.650 | 341.517  | 531.692  |
| AMK58_12110 | K16871 4-aminobutyrate--pyruvate transaminase [EC:2.6.1.961] (GenBank) aminotransferase              | Metabolism: Amino Acid              | 21.259   | 30.463   | 26.212   | 63.323  | 171.258  | 85.585   |
| AMK58_12115 | no KO assigned I (GenBank) hypothetical protein                                                      | Hypothetical                        | 1386.939 | 1700.425 | 1461.037 | 422.409 | 495.623  | 346.304  |
| AMK58_12120 | K00643 5-aminolevulinat synthase [EC:2.3.1.37] (GenBank) 5-aminolevulinat synthase                   | Metabolism: Amino Acid              | 175.882  | 157.174  | 162.209  | 235.336 | 129.373  | 267.599  |
| AMK58_12125 | no KO assigned I (GenBank) hypothetical protein                                                      | Hypothetical                        | 43.684   | 27.821   | 48.282   | 231.991 | 63.061   | 266.692  |
| AMK58_12130 | no KO assigned I (GenBank) hypothetical protein                                                      | Hypothetical                        | 724.267  | 678.670  | 757.385  | 321.241 | 193.543  | 407.176  |
| AMK58_12135 | no KO assigned I (GenBank) oxidoreductase                                                            | Oxidoreductase                      | 19.359   | 26.464   | 20.278   | 114.277 | 20.654   | 75.759   |
| AMK58_12140 | no KO assigned I (GenBank) signal protein PDZ                                                        | No COG                              | 187.625  | 213.110  | 176.748  | 172.971 | 167.138  | 175.398  |
| AMK58_12145 | no KO assigned I (GenBank) NUDIX hydrolase                                                           | hydrolase                           | 1426.199 | 2098.349 | 1868.862 | 115.332 | 2427.810 | 314.355  |
| AMK58_12150 | K09760 DNA recombination protein RmuC I (GenBank) DNA polymerase V                                   | DNA Repair and Replication          | 295.304  | 349.426  | 312.833  | 44.832  | 961.412  | 148.096  |
| AMK58_12155 | K03704 cold shock protein (beta-ribbon_CspA family) I (GenBank) cold-shock protein                   | Stress Response                     | 773.149  | 957.585  | 939.590  | 560.700 | 1255.946 | 1069.770 |
| AMK58_12160 | no KO assigned I (GenBank) hypothetical protein                                                      | Hypothetical                        | 149.378  | 200.410  | 172.928  | 619.957 | 925.552  | 353.820  |
| AMK58_12165 | K01462 peptide deformylase [EC:3.5.1.881] (GenBank) peptide deformylase                              | Hydrolase                           | 147.105  | 174.062  | 171.203  | 193.535 | 631.880  | 293.185  |
| AMK58_12170 | K00604 methionyl-tRNA formyltransferase [EC:2.1.2.91] (GenBank) methionyl-tRNA formyltransferase     | tRNA synthesis/modification         | 33.111   | 35.832   | 53.580   | 455.928 | 226.962  | 315.259  |
| AMK58_12175 | K06173 tRNA pseudouridine38-40 synthase [EC:5.4.99.12] (GenBank) pseudouridine synthase              | tRNA synthesis/modification         | 1190.569 | 1116.398 | 1098.778 | 113.838 | 2943.154 | 207.653  |
| AMK58_12180 | K01997 branched-chain amino acid transport system permease protein I (GenBank) branched-chain amino  | Transport: Amino Acid               | 18.907   | 20.093   | 23.162   | 46.513  | 28.915   | 68.104   |
| AMK58_12185 | no KO assigned I (GenBank) hypothetical protein                                                      | Hypothetical                        | 400.288  | 382.181  | 364.935  | 87.529  | 565.975  | 262.217  |
| AMK58_12190 | no KO assigned I (GenBank) drug:proton antiporter                                                    | Transport                           | 63.100   | 63.150   | 62.432   | 387.444 | 190.588  | 100.686  |
| AMK58_12195 | no KO assigned I (GenBank) DNA-binding protein                                                       | No COG                              | 14.389   | 14.677   | 18.019   | 162.421 | 50.887   | 95.836   |
| AMK58_12200 | K01703 3-isopropylmalate(R)-2-methylmalate dehydratase large subunit [EC:4.2.1.33.4.2.1.35] (GenB    | Metabolism                          | 36.219   | 34.519   | 42.309   | 175.355 | 55.058   | 120.106  |
| AMK58_12205 | no KO assigned I (GenBank) hypothetical protein                                                      | Hypothetical                        | 13.453   | 32.880   | 28.489   | 444.782 | 87.292   | 293.716  |
| AMK58_12210 | no KO assigned I (GenBank) hypothetical protein                                                      | Hypothetical                        | 1.302    | 2.333    | 1.609    | 103.590 | 10.829   | 45.029   |
| AMK58_12215 | K02884 large subunit ribosomal protein L19 I (GenBank) 50S ribosomal protein L19                     | Ribosome                            | 5.198    | 1.827    | 9.593    | 324.372 | 38.835   | 201.008  |
| AMK58_12220 | K00554 tRNA (guanine37-N1)-methyltransferase [EC:2.1.1.228] (GenBank) tRNA (guanine-N1)-methyl       | tRNA synthesis/modification         | 220.232  | 153.521  | 195.745  | 466.917 | 98.884   | 292.238  |
| AMK58_12225 | K02860 16S rRNA processing protein RimM I (GenBank) rimM: 16S rRNA-processing protein RimM           | Ribosome                            | 24.175   | 17.905   | 19.756   | 77.346  | 20.436   | 113.567  |
| AMK58_12230 | K02959 small subunit ribosomal protein S16 I (GenBank) 30S ribosomal protein S16                     | Ribosome                            | 148.094  | 145.080  | 148.289  | 626.294 | 126.482  | 330.783  |
| AMK58_12235 | K03106 signal recognition particle subunit SRP54 [EC:3.6.5.4] (GenBank) RNA-binding protein          | Secretion system                    | 367.915  | 401.335  | 411.416  | 37.345  | 653.208  | 103.242  |
| AMK58_12240 | no KO assigned I (GenBank) hypothetical protein                                                      | Hypothetical                        | 321.979  | 369.362  | 328.490  | 109.431 | 958.136  | 262.045  |
| AMK58_12245 | no KO assigned I (GenBank) hypothetical protein                                                      | Hypothetical                        | 443.941  | 558.106  | 481.316  | 100.667 | 1120.227 | 1392.563 |
| AMK58_12250 | no KO assigned I (GenBank) hypothetical protein                                                      | Hypothetical                        | 372.107  | 368.023  | 367.206  | 125.972 | 564.342  | 240.296  |
| AMK58_12255 | no KO assigned I (GenBank) hypothetical protein                                                      | Hypothetical                        | 96.860   | 123.539  | 111.670  | 190.978 | 881.809  | 234.715  |
| AMK58_12260 | no KO assigned I (GenBank) diguanylate cyclase                                                       | cyclic nucleotide                   | 202.363  | 210.819  | 220.594  | 169.554 | 106.707  | 168.769  |
| AMK58_12265 | K07025 putative hydrolase of the HAD superfamily I (GenBank) HAD family hydrolase                    | hydrolase                           | 77.667   | 111.450  | 110.344  | 133.833 | 121.980  | 102.623  |
| AMK58_12270 | K00674 2,3,4,5-tetrahydroxyridine-2-carboxylate N-succinyltransferase [EC:2.3.1.117] (GenBank) 2,3   | Metabolism: Amino Acid              | 27.719   | 30.033   | 30.043   | 171.998 | 56.181   | 65.391   |
| AMK58_12275 | K01439 succinyl-diaminopimelate desuccinylase [EC:3.5.1.181] (GenBank) succinyl-diaminopimelate des  | Metabolism: Amino Acid              | 73.034   | 92.408   | 103.919  | 185.512 | 43.752   | 141.239  |
| AMK58_12280 | no KO assigned I (GenBank) hypothetical protein                                                      | Hypothetical                        | 580.734  | 684.015  | 770.287  | 499.931 | 178.354  | 384.474  |
| AMK58_12285 | K00768 nicotinate-nucleotide-dimethylbenzimidazole phosphoribosyltransferase [EC:2.4.2.21] (GenBa    | Metabolism: Co-Factors and Vitamins | 111.426  | 130.049  | 114.671  | 98.194  | 164.264  | 172.387  |
| AMK58_12290 | K02233 adenosylcobinamide-GDP ribazoletransferase [EC:2.7.8.26] (GenBank) cobalamin synthase         | Metabolism: Co-Factors and Vitamins | 324.418  | 273.577  | 285.288  | 258.458 | 242.874  | 247.281  |
| AMK58_12295 | K02226 alpha-ribazole phosphate [EC:3.1.3.73] (GenBank) phosphoglycerate mutase                      | Metabolism                          | 190.205  | 175.359  | 168.547  | 535.446 | 185.799  | 341.106  |
| AMK58_12300 | no KO assigned I (GenBank) pyridoxamine 5'-phosphate oxidase                                         | No COG                              | 64.098   | 59.570   | 51.916   | 127.841 | 259.911  | 198.123  |
| AMK58_12305 | K02536 UDP-3-O-[3-hydroxymyristoyl] glucosamine N-acetyltransferase [EC:2.3.1.191] (GenBank) UDP     | Lipopolysaccharide biosynthesis     | 39.070   | 46.813   | 43.782   | 138.893 | 91.332   | 87.984   |
| AMK58_12310 | K01992 ABC-2 type transport system permease protein I (GenBank) ABC transporter                      | Membrane Transport                  | 2.170    | 3.457    | 3.576    | 100.761 | 16.585   | 36.216   |
| AMK58_12315 | K01990 ABC-2 type transport system ATP-binding protein I (GenBank) ABC transporter                   | Membrane Transport                  | 2.721    | 4.515    | 3.162    | 110.149 | 18.520   | 33.499   |
| AMK58_12320 | K15011 two-component system_sensory histidine kinase RegB [EC:2.7.13.3] (GenBank) histidine kinase   | Signal Transduction                 | 21.997   | 22.809   | 30.768   | 42.008  | 697.529  | 135.617  |
| AMK58_12325 | K15012 two-component system_response regulator RegA I (GenBank) two-component system response re     | Signal Transduction                 | 179.232  | 200.314  | 216.069  | 387.583 | 512.269  | 386.707  |
| AMK58_12330 | no KO assigned I (GenBank) hypothetical protein                                                      | Hypothetical                        | 422.501  | 478.470  | 515.637  | 717.166 | 1009.358 | 808.692  |
| AMK58_12335 | K01420 CRP/FNR family transcriptional regulator_anaerobic regulatory protein I (GenBank) Crp/Fnr fa  | Transcription                       | 118.978  | 135.694  | 146.847  | 274.756 | 344.455  | 233.126  |
| AMK58_12340 | K16554 polysaccharide biosynthesis transport protein I (GenBank) protein tyrosine kinase             | Biosynthesis: polysaccharide        | 15.813   | 8.589    | 14.327   | 75.316  | 16.678   | 77.315   |
| AMK58_12345 | no KO assigned I (GenBank) polysaccharide biosynthesis protein                                       | Biosynthesis: polysaccharide        | 123.252  | 127.563  | 147.203  | 59.334  | 59.670   | 57.299   |
| AMK58_12350 | K02472 UDP-N-acetyl-D-mannosaminuronic acid dehydrogenase [EC:1.1.1.336] (GenBank) UDP-gluc          | Metabolism: Carbohydrates           | 30.715   | 53.878   | 49.664   | 40.666  | 35.629   | 51.250   |
| AMK58_12355 | K01784 UDP-glucose 4-epimerase [EC:5.1.3.21] (GenBank) NAD-dependent dehydratase                     | Energy                              | 23.997   | 33.308   | 34.570   | 154.393 | 58.170   | 206.221  |
| AMK58_12360 | K02377 GDP-L-fucose synthase [EC:1.1.1.271] (GenBank) GDP-fucose synthetase                          | Metabolism: Carbohydrate            | 48.105   | 44.043   | 99.437   | 406.887 | 172.188  | 481.983  |
| AMK58_12365 | K03208 colanic acid biosynthesis glycosyl transferase WcaI I (GenBank) glycosyl transferase          | glycosyl transferase                | 3.712    | 2.843    | 11.584   | 252.969 | 34.986   | 175.289  |
| AMK58_12370 | no KO assigned I (GenBank) glycosyl transferase family 1                                             | Glycosyl transferase                | 14.885   | 9.549    | 31.724   | 250.639 | 129.805  | 191.655  |
| AMK58_12375 | no KO assigned I (GenBank) glycosyl transferase                                                      | Glycosyl Transferase                | 7.587    | 8.184    | 18.134   | 178.983 | 76.634   | 103.964  |
| AMK58_12380 | K06134 ubiquinone biosynthesis monooxygenase CooG [EC:1.14.13.-1] (GenBank) hypothetical protein     | Metabolism: Co-Factors and Vitamins | 9.424    | 9.792    | 22.400   | 250.551 | 141.620  | 269.941  |
| AMK58_12385 | no KO assigned I (GenBank) hypothetical protein                                                      | Hypothetical                        | 1.488    | 1.111    | 4.185    | 125.065 | 22.856   | 47.886   |
| AMK58_12390 | no KO assigned I (GenBank) hypothetical protein                                                      | Hypothetical                        | 4.937    | 6.726    | 11.693   | 150.817 | 47.895   | 115.080  |



|                             |                                                                                                                        |                                     |           |           |           |          |           |          |
|-----------------------------|------------------------------------------------------------------------------------------------------------------------|-------------------------------------|-----------|-----------|-----------|----------|-----------|----------|
| <a href="#">AMK58_12395</a> | <a href="#">no KO assigned   (GenBank) hypothetical protein.</a>                                                       | Hypothetical                        | 3.622     | 4.946     | 8.757     | 204.742  | 49.203    | 120.042  |
| <a href="#">AMK58_12400</a> | <a href="#">K16649 rhampopyranosyl-N-acetylglucosaminyl-diphospho-decaprenol beta-1.3/1.4-galactofuranosyltransf</a>   | Biosynthesis: polysaccharide        | 0.843     | 3.599     | 2.635     | 123.616  | 21.667    | 24.018   |
| <a href="#">AMK58_12405</a> | <a href="#">no KO assigned   (GenBank) hypothetical protein.</a>                                                       | Hypothetical                        | 12.841    | 20.354    | 30.898    | 312.260  | 91.318    | 187.845  |
| <a href="#">AMK58_12410</a> | <a href="#">no KO assigned   (GenBank) hypothetical protein.</a>                                                       | Hypothetical                        | 8.619     | 6.738     | 19.225    | 149.237  | 88.737    | 184.427  |
| <a href="#">AMK58_12415</a> | <a href="#">K02914 large subunit ribosomal protein L34   (GenBank) rpmH; 50S ribosomal protein L34.</a>                | Ribosome                            | 10.762    | 10.716    | 34.962    | 1768.427 | 306.462   | 540.558  |
| <a href="#">AMK58_12420</a> | <a href="#">K03536 ribonuclease P protein component [EC:3.1.26.51]   (GenBank) ribonuclease P protein component.</a>   | post translation modificaton        | 4.261     | 7.488     | 19.067    | 417.049  | 154.408   | 238.718  |
| <a href="#">AMK58_12425</a> | <a href="#">K03217 YidC/Oxa1 family membrane protein insertase   (GenBank) hypothetical protein.</a>                   | Membrane                            | 1.600     | 3.741     | 7.807     | 120.894  | 47.085    | 96.462   |
| <a href="#">AMK58_12430</a> | <a href="#">K03978 GTP-binding protein   (GenBank) GTP-binding protein.</a>                                            | Cell Cycle/Shape/Homeostasis        | 29.584    | 42.550    | 65.113    | 616.698  | 542.320   | 276.017  |
| <a href="#">AMK58_12435</a> | <a href="#">no KO assigned   (GenBank) cation:proton antiporter.</a>                                                   | Transport: ion                      | 26.428    | 40.471    | 36.922    | 11.758   | 24.988    | 12.651   |
| <a href="#">AMK58_12440</a> | <a href="#">no KO assigned   (GenBank) hypothetical protein.</a>                                                       | Hypothetical                        | 533.517   | 817.451   | 699.605   | 354.699  | 797.196   | 523.012  |
| <a href="#">AMK58_12445</a> | <a href="#">K00930 acetylglutamate kinase [EC:2.7.2.81]   (GenBank) acetylglutamate kinase.</a>                        | Biosynthesis: Amino Acid            | 944.921   | 726.570   | 736.633   | 338.067  | 1437.598  | 325.707  |
| <a href="#">AMK58_12450</a> | <a href="#">no KO assigned   (GenBank) hypothetical protein.</a>                                                       | Hypothetical                        | 141.254   | 111.460   | 133.219   | 376.904  | 386.025   | 435.310  |
| <a href="#">AMK58_12455</a> | <a href="#">K03284 magnesium transporter   (GenBank) magnesium transporter.</a>                                        | Transport: Inorganic                | 37.528    | 30.875    | 36.384    | 278.716  | 235.259   | 199.210  |
| <a href="#">AMK58_12460</a> | <a href="#">no KO assigned   (GenBank) hypothetical protein.</a>                                                       | Hypothetical                        | 6.031     | 16.629    | 12.350    | 207.548  | 463.551   | 193.138  |
| <a href="#">AMK58_12465</a> | <a href="#">no KO assigned   (GenBank) hypothetical protein.</a>                                                       | Hypothetical                        | 151.399   | 142.540   | 140.136   | 335.722  | 124.063   | 347.147  |
| <a href="#">AMK58_12470</a> | <a href="#">K01962 acetyl-CoA carboxylase carboxyl transferase subunit alpha [EC:6.4.1.21]   (GenBank) acetyl-CoA.</a> | Metabolism                          | 8.983     | 18.141    | 10.225    | 32.369   | 11.661    | 20.882   |
| <a href="#">AMK58_12475</a> | <a href="#">no KO assigned   (GenBank) hypothetical protein.</a>                                                       | Hypothetical                        | 31.096    | 41.109    | 31.327    | 254.180  | 114.080   | 107.239  |
| <a href="#">AMK58_12480</a> | <a href="#">K01638 malate synthase [EC:2.3.3.91]   (GenBank) malate synthase.</a>                                      | Metabolism                          | 12.221    | 8.112     | 9.898     | 7.781    | 25.438    | 30.778   |
| <a href="#">AMK58_12485</a> | <a href="#">K04763 integrase/recombinase XerD   (GenBank) recombinase XerD.</a>                                        | Genetic Information Processing      | 14.933    | 11.252    | 14.070    | 78.029   | 48.086    | 84.576   |
| <a href="#">AMK58_12490</a> | <a href="#">no KO assigned   (GenBank) hypothetical protein.</a>                                                       | Hypothetical                        | 134.587   | 116.329   | 120.953   | 86.547   | 84.959    | 92.519   |
| <a href="#">AMK58_12495</a> | <a href="#">K00891 shikimate kinase [EC:2.7.1.711]   (GenBank) shikimate kinase.</a>                                   | Biosynthesis: Amino Acid            | 23.987    | 26.159    | 32.762    | 217.013  | 169.689   | 249.959  |
| <a href="#">AMK58_12500</a> | <a href="#">K01735 3-dehydroquinate synthase [EC:4.2.3.41]   (GenBank) 3-dehydroquinate synthase.</a>                  | Biosynthesis: Amino Acid            | 650.579   | 600.593   | 623.185   | 268.616  | 352.610   | 346.873  |
| <a href="#">AMK58_12505</a> | <a href="#">no KO assigned   (GenBank) histidine kinase.</a>                                                           | Signal Transduction                 | 27.653    | 26.791    | 32.925    | 340.056  | 87.929    | 274.668  |
| <a href="#">AMK58_12510</a> | <a href="#">no KO assigned   (GenBank) hypothetical protein.</a>                                                       | Hypothetical                        | 42.721    | 57.633    | 53.722    | 407.970  | 119.496   | 100.039  |
| <a href="#">AMK58_12515</a> | <a href="#">no KO assigned   (GenBank) hypothetical protein.</a>                                                       | Hypothetical                        | 88.099    | 72.042    | 72.300    | 47.139   | 66.110    | 101.317  |
| <a href="#">AMK58_12520</a> | <a href="#">K05527 BolA protein   (GenBank) transcriptional regulator.</a>                                             | Transcription                       | 136.154   | 151.030   | 192.708   | 825.782  | 161.019   | 459.771  |
| <a href="#">AMK58_12525</a> | <a href="#">no KO assigned   (GenBank) molecular chaperone DnaJ.</a>                                                   | Chaperone                           | 193.513   | 144.671   | 214.102   | 479.349  | 167.499   | 231.832  |
| <a href="#">AMK58_12530</a> | <a href="#">K09882 cobaltochelataase CobS [EC:6.6.1.21]   (GenBank) cobalamin biosynthesis protein CobS.</a>           | Metabolism: Co-Factors and Vitamins | 981.368   | 1209.911  | 1112.244  | 128.296  | 78.000    | 87.582   |
| <a href="#">AMK58_12535</a> | <a href="#">no KO assigned   (GenBank) GxxExyY protein.</a>                                                            | DNA Repair and Replication          | 3956.699  | 3947.129  | 3959.064  | 254.134  | 1428.086  | 439.649  |
| <a href="#">AMK58_12540</a> | <a href="#">K09883 cobaltochelataase CobT [EC:6.6.1.21]   (GenBank) cobalt chelatase.</a>                              | Metabolism: Co-Factors and Vitamins | 64.950    | 98.463    | 101.978   | 45.110   | 250.161   | 60.467   |
| <a href="#">AMK58_12545</a> | <a href="#">no KO assigned   (GenBank) hypothetical protein.</a>                                                       | Hypothetical                        | 63.252    | 76.143    | 67.097    | 102.117  | 66.057    | 140.939  |
| <a href="#">AMK58_12550</a> | <a href="#">K02012 iron(III) transport system substrate-binding protein   (GenBank) iron deficiency-induced prot.</a>  | Transport: Metal                    | 38.593    | 41.475    | 41.841    | 178.420  | 163.867   | 201.191  |
| <a href="#">AMK58_12555</a> | <a href="#">K06911 uncharacterized protein   (GenBank) quercetin 2,3-dioxygenase.</a>                                  | No COG                              | 1238.984  | 1121.244  | 1089.359  | 88.066   | 657.864   | 259.847  |
| <a href="#">AMK58_12560</a> | <a href="#">K02011 iron(III) transport system permease protein   (GenBank) iron ABC transporter permease.</a>          | No COG                              | 128.836   | 97.596    | 106.123   | 27.031   | 106.349   | 78.753   |
| <a href="#">AMK58_12565</a> | <a href="#">K00761 uracil phosphoribosyltransferase [EC:2.4.2.91]   (GenBank) Uracil phosphoribosyltransferase.</a>    | Metabolism: Nucleotides             | 368.804   | 352.233   | 319.716   | 363.486  | 445.282   | 452.528  |
| <a href="#">AMK58_12570</a> | <a href="#">K13069 diguanylate cyclase [EC:2.7.7.651]   (GenBank) diguanylate cyclase.</a>                             | cyclic nucleotide                   | 213.568   | 186.570   | 177.019   | 107.947  | 31.383    | 163.312  |
| <a href="#">AMK58_12575</a> | <a href="#">K01817 phosphoribosylanthranilate isomerase [EC:5.3.1.24]   (GenBank) N-(5'-phosphoribosyl)anthranil</a>   | Biosynthesis: Amino Acid            | 6422.124  | 5811.066  | 5150.039  | 291.540  | 312.372   | 402.428  |
| <a href="#">AMK58_12580</a> | <a href="#">K01591 orotidine-5'-phosphate decarboxylase [EC:4.1.1.23]   (GenBank) orotidine 5'-phosphate decarbo.</a>  | Metabolism: Nucleotides             | 100.387   | 80.035    | 112.056   | 185.355  | 177.264   | 192.462  |
| <a href="#">AMK58_12585</a> | <a href="#">no KO assigned   (GenBank) hypothetical protein.</a>                                                       | Hypothetical                        | 1719.699  | 1918.258  | 2028.475  | 448.475  | 411.632   | 519.316  |
| <a href="#">AMK58_12590</a> | <a href="#">no KO assigned   (GenBank) hypothetical protein.</a>                                                       | Hypothetical                        | 252.919   | 243.068   | 232.410   | 118.470  | 122.765   | 127.199  |
| <a href="#">AMK58_12595</a> | <a href="#">K01750 ornithine cyclodeaminase [EC:4.3.1.12]   (GenBank) ornithine cyclodeaminase.</a>                    | Metabolism: Amino Acid              | 103.616   | 121.693   | 120.412   | 274.547  | 217.152   | 187.703  |
| <a href="#">AMK58_12600</a> | <a href="#">no KO assigned   (GenBank) hypothetical protein.</a>                                                       | Hypothetical                        | 138.770   | 126.124   | 152.311   | 476.993  | 291.379   | 217.918  |
| <a href="#">AMK58_12605</a> | <a href="#">K05788 integration host factor subunit beta   (GenBank) integration host factor subunit beta.</a>          | DNA Repair and Replication          | 217.085   | 200.509   | 218.524   | 751.746  | 980.826   | 367.929  |
| <a href="#">AMK58_12610</a> | <a href="#">no KO assigned   (GenBank) hypothetical protein.</a>                                                       | Hypothetical                        | 7.502     | 4.482     | 8.702     | 100.688  | 591.930   | 94.462   |
| <a href="#">AMK58_12615</a> | <a href="#">K02945 small subunit ribosomal protein S1   (GenBank) 30S ribosomal protein S1.</a>                        | Ribosome                            | 14.444    | 14.383    | 18.648    | 153.270  | 58.098    | 57.251   |
| <a href="#">AMK58_12620</a> | <a href="#">K00945 CMP/dCMP kinase [EC:2.7.4.25]   (GenBank) cvtidylate kinase.</a>                                    | Metabolism: Nucleotide              | 266.438   | 259.666   | 251.421   | 274.958  | 238.933   | 233.345  |
| <a href="#">AMK58_12625</a> | <a href="#">K00800 3-phosphoshikimate 1-carboxyvinyltransferase [EC:2.5.1.191]   (GenBank) 3-phosphoshikimate 1-</a>   | Metabolism: Amino Acid              | 183.874   | 134.075   | 146.179   | 100.972  | 52.179    | 39.269   |
| <a href="#">AMK58_12630</a> | <a href="#">K00681 gamma-glutamyltranspeptidase / glutathione hydrolase [EC:2.3.2.3.4.19.13]   (GenBank) gamma</a>     | Metabolism: amino acids             | 114.728   | 100.157   | 111.970   | 76.149   | 28.614    | 61.924   |
| <a href="#">AMK58_12635</a> | <a href="#">no KO assigned   (GenBank) hypothetical protein.</a>                                                       | Hypothetical                        | 201.483   | 224.553   | 282.671   | 451.067  | 445.333   | 334.238  |
| <a href="#">AMK58_12640</a> | <a href="#">K14218 tRNA Ala   (GenBank) tRNA-Ala.</a>                                                                  | tRNA synthesis/modification         | 41729.381 | 35425.387 | 41059.593 | 1841.663 | 92093.907 | 7762.857 |
| <a href="#">AMK58_12645</a> | <a href="#">no KO assigned   (GenBank) hypothetical protein.</a>                                                       | Hypothetical                        | 885.278   | 964.474   | 864.424   | 188.926  | 2446.263  | 373.427  |
| <a href="#">AMK58_12650</a> | <a href="#">K06911 uncharacterized protein   (GenBank) pirin.</a>                                                      | No COG                              | 146.952   | 131.374   | 145.078   | 205.651  | 110.020   | 144.098  |
| <a href="#">AMK58_12655</a> | <a href="#">K03750 molybdopterin molybdotransferase [EC:2.10.1.1]   K07219 putative molybdopterin biosynthesis pr</a>  | Metabolism: Co-Factors and Vitamins | 36.518    | 40.429    | 38.721    | 210.368  | 87.028    | 104.016  |
| <a href="#">AMK58_12660</a> | <a href="#">K03750 molybdopterin molybdotransferase [EC:2.10.1.1]   (GenBank) molybdopterin biosynthesis protein.</a>  | Metabolism: Co-Factors and Vitamins | 208.995   | 238.171   | 158.183   | 22.999   | 110.250   | 82.166   |
| <a href="#">AMK58_12665</a> | <a href="#">no KO assigned   (GenBank) diguanylate cyclase.</a>                                                        | cyclic nucleotide                   | 40.753    | 34.558    | 41.123    | 46.138   | 26.894    | 83.379   |
| <a href="#">AMK58_12670</a> | <a href="#">no KO assigned   (GenBank) histidine kinase.</a>                                                           | Signal Transduction                 | 4.828     | 4.902     | 4.920     | 10.736   | 5.604     | 11.031   |
| <a href="#">AMK58_12675</a> | <a href="#">no KO assigned   (GenBank) hypothetical protein.</a>                                                       | Hypothetical                        | 55.464    | 55.366    | 69.653    | 60.765   | 123.385   | 55.770   |
| <a href="#">AMK58_12680</a> | <a href="#">K20534 polvisonprenyl-phosphate glycosyltransferase [EC:2.4.-.-1]   (GenBank) glycosyltransferase.</a>     | Biosynthesis: polysacchharide       | 102.848   | 129.634   | 124.918   | 368.697  | 187.799   | 167.197  |
| <a href="#">AMK58_12685</a> | <a href="#">no KO assigned   (GenBank) hypothetical protein.</a>                                                       | Hypothetical                        | 38.085    | 39.054    | 57.289    | 461.811  | 109.897   | 125.183  |
| <a href="#">AMK58_12690</a> | <a href="#">no KO assigned   (GenBank) heat-shock protein Hsp20.</a>                                                   | Stress Response                     | 117.790   | 141.587   | 118.465   | 273.139  | 126.862   | 356.609  |
| <a href="#">AMK58_12695</a> | <a href="#">no KO assigned   (GenBank) hypothetical protein.</a>                                                       | Hypothetical                        | 1138.942  | 1265.089  | 1229.430  | 3047.831 | 1355.630  | 2669.685 |
| <a href="#">AMK58_12700</a> | <a href="#">no KO assigned   (GenBank) hypothetical protein.</a>                                                       | Hypothetical                        | 7.057     | 13.835    | 15.307    | 517.134  | 30.863    | 332.617  |
| <a href="#">AMK58_12705</a> | <a href="#">no KO assigned   (GenBank) hypothetical protein.</a>                                                       | Hypothetical                        | 0.000     | 0.000     | 0.834     | 135.938  | 4.931     | 152.405  |
| <a href="#">AMK58_12710</a> | <a href="#">no KO assigned   (GenBank) transcriptional regulator.</a>                                                  | Transcription                       | 6.939     | 3.384     | 16.292    | 261.584  | 151.215   | 238.064  |
| <a href="#">AMK58_12715</a> | <a href="#">no KO assigned   (GenBank) hypothetical protein.</a>                                                       | Hypothetical                        | 0.887     | 1.136     | 1.024     | 59.748   | 16.664    | 38.363   |
| <a href="#">AMK58_12720</a> | <a href="#">K01681 aconitate hydratase [EC:4.2.1.31]   (GenBank) aconitate hydratase.</a>                              | Metabolism: Carbohydrate            | 83.731    | 80.373    | 78.585    | 57.979   | 714.148   | 42.263   |
| <a href="#">AMK58_12725</a> | <a href="#">K01999 branched-chain amino acid transport system substrate-binding protein   (GenBank) ABC transpor</a>   | Transport: Amino Acid               | 39.994    | 38.100    | 38.373    | 52.720   | 428.760   | 62.175   |

|                             |                                                                                                                       |                                     |           |           |           |          |           |          |
|-----------------------------|-----------------------------------------------------------------------------------------------------------------------|-------------------------------------|-----------|-----------|-----------|----------|-----------|----------|
| <a href="#">AMK58_12730</a> | <a href="#">no KO assigned   (GenBank) hypothetical protein.</a>                                                      | Hypothetical                        | 271.231   | 260.975   | 229.448   | 129.272  | 101.670   | 270.108  |
| <a href="#">AMK58_12735</a> | <a href="#">no KO assigned   (GenBank) DNA mismatch repair protein MutT.</a>                                          | DNA Repair and Replication          | 24.584    | 24.479    | 25.127    | 214.601  | 70.234    | 162.231  |
| <a href="#">AMK58_12740</a> | <a href="#">K02342 DNA polymerase III subunit epsilon [EC:2.7.7.7]   (GenBank) exonuclease</a>                        | DNA Repair and Replication          | 17.742    | 19.802    | 20.206    | 334.035  | 75.169    | 122.213  |
| <a href="#">AMK58_12745</a> | <a href="#">K08963 methylthioribose-1-phosphate isomerase [EC:5.3.1.23]   (GenBank) methylthioribose-1-phosphate</a>  | Metabolism: Amino Acid              | 51.465    | 42.048    | 64.303    | 345.289  | 247.588   | 541.016  |
| <a href="#">AMK58_12750</a> | <a href="#">no KO assigned   (GenBank) histidine kinase.</a>                                                          | Signal Transduction                 | 439.457   | 408.346   | 455.662   | 272.829  | 998.505   | 334.730  |
| <a href="#">AMK58_12755</a> | <a href="#">K02342 DNA polymerase III subunit epsilon [EC:2.7.7.7]   (GenBank) hypothetical protein.</a>              | DNA Repair and Replication          | 104.633   | 136.932   | 119.856   | 683.116  | 131.333   | 405.418  |
| <a href="#">AMK58_12760</a> | <a href="#">K07182 CBS domain-containing protein   (GenBank) hypothetical protein.</a>                                | No COG                              | 62.522    | 56.129    | 59.572    | 81.979   | 94.001    | 91.411   |
| <a href="#">AMK58_12765</a> | <a href="#">K14393 cation/acetate symporter   (GenBank) actP: cation/acetate symporter ActP.</a>                      | Transport: Ion                      | 12.016    | 11.824    | 11.089    | 19.504   | 26.853    | 60.886   |
| <a href="#">AMK58_12770</a> | <a href="#">no KO assigned   (GenBank) hypothetical protein.</a>                                                      | Hypothetical                        | 46.352    | 57.295    | 64.208    | 468.894  | 121.720   | 344.590  |
| <a href="#">AMK58_12775</a> | <a href="#">no KO assigned   (GenBank) hypothetical protein.</a>                                                      | Hypothetical                        | 84.385    | 83.569    | 92.662    | 344.952  | 142.279   | 276.209  |
| <a href="#">AMK58_12780</a> | <a href="#">no KO assigned   (GenBank) SAM-dependent methyltransferase.</a>                                           | methyltransferase                   | 51.492    | 57.013    | 61.435    | 659.662  | 135.199   | 396.170  |
| <a href="#">AMK58_12785</a> | <a href="#">no KO assigned   (GenBank) hypothetical protein.</a>                                                      | Hypothetical                        | 51.232    | 67.463    | 56.864    | 147.900  | 38.313    | 161.715  |
| <a href="#">AMK58_12790</a> | <a href="#">no KO assigned   (GenBank) amidohydrolase.</a>                                                            | hydrolase                           | 201.502   | 229.019   | 219.923   | 408.274  | 105.037   | 478.320  |
| <a href="#">AMK58_12795</a> | <a href="#">K03676 glutaredoxin 3   (GenBank) glutaredoxin.</a>                                                       | Chaperone                           | 52428.134 | 47015.371 | 51554.534 | 1209.676 | 2540.922  | 1272.390 |
| <a href="#">AMK58_12800</a> | <a href="#">no KO assigned   (GenBank) competence protein ComF.</a>                                                   | Secretion System                    | 5095.068  | 4392.635  | 4218.088  | 57.332   | 213.652   | 149.693  |
| <a href="#">AMK58_12805</a> | <a href="#">K02420 flagellar biosynthetic protein FljO   (GenBank) flagellar biosynthetic protein FljO.</a>           | Motility                            | 118.807   | 143.587   | 104.771   | 194.988  | 134.564   | 336.389  |
| <a href="#">AMK58_12810</a> | <a href="#">no KO assigned   (GenBank) SAM-dependent methyltransferase.</a>                                           | methyltransferase                   | 28.750    | 35.482    | 44.405    | 223.299  | 56.592    | 107.639  |
| <a href="#">AMK58_12815</a> | <a href="#">K09792 uncharacterized protein   (GenBank) hypothetical protein.</a>                                      | Hypothetical                        | 14.661    | 11.302    | 19.037    | 210.757  | 105.437   | 136.536  |
| <a href="#">AMK58_12820</a> | <a href="#">no KO assigned   (GenBank) hypothetical protein.</a>                                                      | Hypothetical                        | 127.668   | 157.563   | 149.503   | 309.920  | 442.640   | 239.175  |
| <a href="#">AMK58_12825</a> | <a href="#">no KO assigned   (GenBank) hypothetical protein.</a>                                                      | Hypothetical                        | 86.298    | 91.061    | 72.051    | 81.381   | 162.395   | 105.303  |
| <a href="#">AMK58_12830</a> | <a href="#">K02227 adenosylcobinamide-phosphate synthase [EC:6.3.1.10]   (GenBank) cobalamin biosynthesis protei</a>  | Metabolism: Co-Factors and Vitamins | 8.528     | 17.223    | 16.103    | 156.072  | 28.218    | 42.435   |
| <a href="#">AMK58_12835</a> | <a href="#">no KO assigned   (GenBank) RNA helicase.</a>                                                              | No COG                              | 24.250    | 20.179    | 16.634    | 31.439   | 25.895    | 51.879   |
| <a href="#">AMK58_12840</a> | <a href="#">K03282 large conductance mechanosensitive channel   (GenBank) mechanosensitive ion channel protein M</a>  | Transport: Ion                      | 129.201   | 140.787   | 169.974   | 363.558  | 490.788   | 210.223  |
| <a href="#">AMK58_12845</a> | <a href="#">K03070 preprotein translocase subunit SecA   (GenBank) preprotein translocase subunit SecA.</a>           | Secretion system                    | 7.042     | 8.940     | 9.415     | 69.626   | 71.089    | 19.507   |
| <a href="#">AMK58_12850</a> | <a href="#">K03769 peptidyl-prolyl cis-trans isomerase C [EC:5.2.1.8]   (GenBank) peptidylprolyl isomerase.</a>       | Chaperone                           | 2.937     | 3.815     | 3.764     | 79.553   | 193.804   | 77.097   |
| <a href="#">AMK58_12855</a> | <a href="#">K00620 glutamate N-acetyltransferase / amino-acid N-acetyltransferase [EC:2.3.1.35 2.3.1.11]   (GenBa</a> | Metabolism: Amino Acid              | 69.088    | 74.145    | 80.648    | 94.118   | 100.175   | 85.811   |
| <a href="#">AMK58_12860</a> | <a href="#">no KO assigned   (GenBank) hypothetical protein.</a>                                                      | Hypothetical                        | 10.031    | 12.544    | 16.192    | 128.749  | 29.893    | 49.321   |
| <a href="#">AMK58_12865</a> | <a href="#">K03574 8-oxo-dGTP diphosphatase [EC:3.6.1.55]   (GenBank) NTP pyrophosphohydrolase.</a>                   | DNA Repair and Replication          | 575.378   | 509.933   | 747.236   | 839.421  | 635.102   | 439.470  |
| <a href="#">AMK58_12870</a> | <a href="#">K03654 ATP-dependent DNA helicase RecQ [EC:3.6.4.12]   (GenBank) ATP-dependent DNA helicase R</a>         | DNA Repair and Replication          | 9.164     | 6.375     | 8.594     | 23.962   | 25.963    | 69.143   |
| <a href="#">AMK58_12875</a> | <a href="#">K14234 tRNA Thr   (GenBank) tRNA-Thr.</a>                                                                 | tRNA synthesis/modification         | 8836.845  | 7918.332  | 7801.994  | 3827.587 | 17699.374 | 6405.359 |
| <a href="#">AMK58_12880</a> | <a href="#">no KO assigned   (GenBank) hypothetical protein.</a>                                                      | Hypothetical                        | 233.940   | 175.567   | 195.513   | 72.151   | 144.286   | 95.621   |
| <a href="#">AMK58_12885</a> | <a href="#">no KO assigned   (GenBank) hypothetical protein.</a>                                                      | Hypothetical                        | 323.431   | 264.725   | 294.908   | 599.218  | 283.290   | 410.870  |
| <a href="#">AMK58_12890</a> | <a href="#">no KO assigned   (GenBank) multidrug DMT transporter permease.</a>                                        | Defense                             | 19.474    | 21.077    | 20.931    | 137.990  | 25.855    | 27.348   |
| <a href="#">AMK58_12895</a> | <a href="#">no KO assigned   (GenBank) C4-dicarboxylate ABC transporter.</a>                                          | Membrane Transport                  | 13.201    | 11.831    | 13.986    | 93.851   | 14.733    | 54.736   |
| <a href="#">AMK58_12900</a> | <a href="#">no KO assigned   (GenBank) C4-dicarboxylate ABC transporter permease.</a>                                 | Membrane Transport                  | 149.800   | 185.803   | 185.545   | 757.185  | 509.416   | 618.364  |
| <a href="#">AMK58_12905</a> | <a href="#">no KO assigned   (GenBank) C4-dicarboxylate ABC transporter.</a>                                          | Membrane Transport                  | 2.118     | 2.812     | 2.461     | 32.942   | 7.010     | 24.440   |
| <a href="#">AMK58_12910</a> | <a href="#">no KO assigned   (GenBank) hypothetical protein.</a>                                                      | Hypothetical                        | 73.463    | 73.336    | 82.758    | 315.901  | 139.438   | 303.180  |
| <a href="#">AMK58_12915</a> | <a href="#">K11890 type VI secretion system protein ImpM   (GenBank) hypothetical protein.</a>                        | Secretion System                    | 61.194    | 35.887    | 57.649    | 120.194  | 44.520    | 80.590   |
| <a href="#">AMK58_12920</a> | <a href="#">K11891 type VI secretion system protein ImpL   (GenBank) hypothetical protein.</a>                        | Secretion System                    | 33.183    | 25.005    | 34.450    | 81.614   | 20.968    | 58.325   |
| <a href="#">AMK58_12925</a> | <a href="#">K11892 type VI secretion system protein ImpK   (GenBank) flagellar motor protein MotB.</a>                | Motility                            | 60.267    | 52.206    | 56.189    | 152.170  | 26.834    | 165.147  |
| <a href="#">AMK58_12930</a> | <a href="#">no KO assigned   (GenBank) hypothetical protein.</a>                                                      | Hypothetical                        | 175.744   | 111.154   | 144.783   | 260.724  | 27.347    | 245.242  |
| <a href="#">AMK58_12935</a> | <a href="#">no KO assigned   (GenBank) hypothetical protein.</a>                                                      | Hypothetical                        | 393.018   | 313.454   | 373.798   | 294.320  | 39.627    | 242.480  |
| <a href="#">AMK58_12940</a> | <a href="#">K07305 peptide-methionine (R)-S-oxide reductase [EC:1.8.4.12]   (GenBank) methionine sulfoxide reduc</a>  | Oxidoreductase                      | 13.208    | 29.226    | 21.861    | 147.442  | 21.445    | 68.496   |
| <a href="#">AMK58_12945</a> | <a href="#">K01061 carboxymethylenebutenolidase [EC:3.1.1.45]   (GenBank) carboxymethylenebutenolidase.</a>           | Metabolism                          | 10.219    | 10.348    | 14.493    | 141.072  | 18.886    | 41.760   |
| <a href="#">AMK58_12950</a> | <a href="#">K01835 phosphoglucomutase [EC:5.4.2.2]   (GenBank) phosphoglucomutase.</a>                                | Metabolism                          | 18.992    | 21.718    | 22.643    | 185.440  | 20.347    | 68.655   |
| <a href="#">AMK58_12955</a> | <a href="#">K03704 cold shock protein (beta-ribbon, CspA family)   (GenBank) cold-shock protein.</a>                  | Stress Response                     | 17.568    | 13.238    | 17.004    | 155.190  | 37.003    | 35.369   |
| <a href="#">AMK58_12960</a> | <a href="#">no KO assigned   (GenBank) hypothetical protein.</a>                                                      | Hypothetical                        | 53.811    | 36.838    | 42.637    | 174.200  | 110.891   | 99.795   |
| <a href="#">AMK58_12965</a> | <a href="#">no KO assigned   (GenBank) hypothetical protein.</a>                                                      | Hypothetical                        | 89.581    | 111.500   | 99.370    | 604.369  | 606.257   | 281.648  |
| <a href="#">AMK58_12970</a> | <a href="#">no KO assigned   (GenBank) hypothetical protein.</a>                                                      | Hypothetical                        | 43.163    | 52.134    | 54.522    | 179.093  | 538.418   | 218.182  |
| <a href="#">AMK58_12975</a> | <a href="#">no KO assigned   (GenBank) metallophosphoesterase.</a>                                                    | phosphoesterase                     | 51.606    | 60.280    | 59.132    | 141.359  | 86.639    | 114.570  |
| <a href="#">AMK58_12980</a> | <a href="#">no KO assigned   (GenBank) hypothetical protein.</a>                                                      | Hypothetical                        | 644.803   | 689.250   | 720.882   | 324.905  | 349.485   | 178.499  |
| <a href="#">AMK58_12985</a> | <a href="#">no KO assigned   (GenBank) MarR family transcriptional regulator.</a>                                     | Transcription                       | 187.574   | 161.659   | 168.318   | 420.209  | 703.664   | 215.821  |
| <a href="#">AMK58_12990</a> | <a href="#">no KO assigned   (GenBank) ABC transporter.</a>                                                           | Membrane Transport                  | 0.779     | 0.000     | 3.259     | 68.882   | 155.535   | 62.854   |
| <a href="#">AMK58_12995</a> | <a href="#">no KO assigned   (GenBank) pseudogene.</a>                                                                | Pseudogene                          | 0.868     | 0.000     | 0.825     | 96.885   | 76.095    | 20.657   |
| <a href="#">AMK58_13000</a> | <a href="#">K02034 peptide/nickel transport system permease protein   (GenBank) D-ala-D-ala transporter subunit</a>   | Quorum sensing                      | 1.328     | 2.379     | 2.398     | 82.516   | 173.399   | 154.125  |
| <a href="#">AMK58_13005</a> | <a href="#">K02033 peptide/nickel transport system permease protein   (GenBank) peptide ABC transporter permease.</a> | Transport: Metal                    | 2.018     | 4.964     | 2.483     | 113.848  | 186.394   | 117.663  |
| <a href="#">AMK58_13010</a> | <a href="#">K02035 peptide/nickel transport system substrate-binding protein   (GenBank) ABC transporter substra</a>  | Quorum sensing                      | 20.104    | 23.842    | 27.205    | 118.210  | 70.586    | 74.218   |
| <a href="#">AMK58_13015</a> | <a href="#">no KO assigned   (GenBank) hypothetical protein.</a>                                                      | Hypothetical                        | 68.173    | 107.526   | 86.598    | 372.589  | 307.742   | 423.793  |
| <a href="#">AMK58_13020</a> | <a href="#">no KO assigned   (GenBank) hypothetical protein.</a>                                                      | Hypothetical                        | 18.289    | 22.580    | 24.127    | 80.912   | 25.261    | 58.888   |
| <a href="#">AMK58_13025</a> | <a href="#">no KO assigned   (GenBank) hypothetical protein.</a>                                                      | Hypothetical                        | 122.559   | 95.738    | 139.102   | 387.577  | 145.433   | 370.655  |
| <a href="#">AMK58_13030</a> | <a href="#">K04343 streptomycin 6-kinase [EC:2.7.1.72]   (GenBank) streptomycin kinase.</a>                           | Defense                             | 65.870    | 65.446    | 73.731    | 294.831  | 50.663    | 201.684  |
| <a href="#">AMK58_13035</a> | <a href="#">K06915 uncharacterized protein   (GenBank) ATP-binding protein.</a>                                       | No COG                              | 61.041    | 52.759    | 68.571    | 109.473  | 26.905    | 122.613  |
| <a href="#">AMK58_13040</a> | <a href="#">no KO assigned   (GenBank) hypothetical protein.</a>                                                      | Hypothetical                        | 586.727   | 547.476   | 604.496   | 122.238  | 138.318   | 209.499  |
| <a href="#">AMK58_13045</a> | <a href="#">K01985 5S ribosomal RNA   (GenBank) 5S ribosomal RNA.</a>                                                 | Ribosome                            | 457.162   | 523.809   | 529.944   | 335.557  | 936.227   | 549.734  |
| <a href="#">AMK58_13050</a> | <a href="#">K01980 23S ribosomal RNA   (GenBank) 23S ribosomal RNA.</a>                                               | Ribosome                            | 16.932    | 26.801    | 24.253    | 135.675  | 56.751    | 70.184   |
| <a href="#">AMK58_13055</a> | <a href="#">K14218 tRNA Ala   (GenBank) tRNA-Ala.</a>                                                                 | tRNA synthesis/modification         | 27.083    | 38.071    | 48.471    | 1011.528 | 250.698   | 261.470  |
| <a href="#">AMK58_13060</a> | <a href="#">K14227 tRNA Ile   (GenBank) tRNA-Ile.</a>                                                                 | tRNA synthesis/modification         | 257.874   | 385.163   | 349.842   | 2550.742 | 973.862   | 2286.219 |

|             |                                                                                                                        |                                |          |          |          |          |           |          |
|-------------|------------------------------------------------------------------------------------------------------------------------|--------------------------------|----------|----------|----------|----------|-----------|----------|
| AMK58_13065 | <a href="#">K01977 16S ribosomal RNA</a>   (GenBank) 16S ribosomal RNA                                                 | Ribosome                       | 22.463   | 25.194   | 32.076   | 205.312  | 56.971    | 125.655  |
| AMK58_13070 | <a href="#">K19302 undecaprenyl-diphosphatase</a> [EC:3.6.1.27]   (GenBank) hypothetical protein                       | Cell Wall                      | 23.528   | 43.094   | 36.087   | 454.351  | 143.622   | 498.127  |
| AMK58_13075 | no KO assigned   (GenBank) CopG family transcriptional regulator                                                       | Transcription                  | 0.000    | 0.000    | 0.000    | 10.679   | 0.000     | 41.812   |
| AMK58_13080 | no KO assigned   (GenBank) diguanylate kinase                                                                          | signal transduction            | 7.090    | 5.120    | 5.408    | 4.905    | 6.218     | 26.225   |
| AMK58_13085 | no KO assigned   (GenBank) pseudogene                                                                                  | Pseudogene                     | 0.000    | 0.000    | 0.000    | 0.000    | 0.000     | 0.000    |
| AMK58_13090 | no KO assigned   (GenBank) hypothetical protein                                                                        | Hypothetical                   | 0.000    | 0.000    | 0.000    | 0.000    | 0.000     | 0.000    |
| AMK58_13095 | no KO assigned   (GenBank) phage shock protein C                                                                       | Defense                        | 0.000    | 0.000    | 0.000    | 0.000    | 0.000     | 0.000    |
| AMK58_13100 | <a href="#">K03970 phage shock protein B</a>   (GenBank) phage shock protein B                                         | Defense                        | 54.696   | 69.797   | 74.221   | 574.764  | 698.373   | 728.768  |
| AMK58_13105 | <a href="#">K03969 phage shock protein A</a>   (GenBank) phage shock protein A                                         | Defense                        | 22.521   | 36.598   | 25.867   | 212.386  | 99.842    | 141.841  |
| AMK58_13110 | <a href="#">K03974 psp operon transcriptional activator</a>   (GenBank) pspF: psp operon transcriptional activator P   | Transcription                  | 100.654  | 144.382  | 168.083  | 315.146  | 168.147   | 227.340  |
| AMK58_13115 | no KO assigned   (GenBank) polyhydroxalkanoic acid synthase                                                            | enzyme                         | 8.537    | 4.637    | 11.069   | 396.108  | 389.087   | 343.286  |
| AMK58_13120 | <a href="#">K05366 penicillin-binding protein 1A</a> [EC:2.4.1.- 3.4.-.]   (GenBank) carboxypeptidase                  | Cell Wall                      | 3.735    | 3.996    | 5.989    | 40.994   | 107.208   | 45.177   |
| AMK58_13125 | <a href="#">K07007 uncharacterized protein</a>   (GenBank) NAD(FAD)-utilizing dehydrogenase                            | Energy                         | 117.873  | 139.686  | 154.322  | 35.218   | 558.985   | 85.552   |
| AMK58_13130 | no KO assigned   (GenBank) hypothetical protein                                                                        | Hypothetical                   | 105.940  | 82.199   | 140.846  | 151.742  | 1539.297  | 275.146  |
| AMK58_13135 | <a href="#">K05532 trimethylamine-N-oxide reductase</a> (cytochrome c), cytochrome c-type subunit TorC   (GenBank) c   | Energy                         | 109.062  | 99.469   | 155.896  | 166.844  | 1219.627  | 294.012  |
| AMK58_13140 | <a href="#">K00428 cytochrome c peroxidase</a> [EC:1.11.1.5]   (GenBank) cytochrome C biogenesis protein CcsA          | Energy                         | 7.349    | 15.115   | 12.486   | 180.099  | 224.114   | 138.969  |
| AMK58_13145 | <a href="#">K03781 catalase</a> [EC:1.11.1.6]   (GenBank) catalase                                                     | enzyme                         | 3.143    | 3.414    | 2.853    | 39.422   | 46.248    | 57.691   |
| AMK58_13150 | <a href="#">K04077 chaperonin GroEL</a>   (GenBank) groEL: molecular chaperone GroEL                                   | Chaperone                      | 31.521   | 32.560   | 36.482   | 282.543  | 96.358    | 169.156  |
| AMK58_13155 | <a href="#">K04078 chaperonin GroES</a>   (GenBank) molecular chaperone GroES                                          | Chaperone                      | 89.038   | 99.430   | 75.559   | 888.957  | 239.449   | 550.546  |
| AMK58_13160 | no KO assigned   (GenBank) Usg family protein                                                                          | No COG                         | 158.223  | 158.919  | 121.224  | 111.196  | 119.597   | 308.742  |
| AMK58_13165 | <a href="#">K01185 lysozyme</a> [EC:3.2.1.17]   (GenBank) muraminidase                                                 | Cell Wall                      | 82.685   | 64.690   | 74.172   | 490.843  | 178.968   | 495.173  |
| AMK58_13170 | no KO assigned   (GenBank) pyridine nucleotide-disulfide oxidoreductase                                                | oxidoreductase                 | 93.188   | 76.578   | 90.514   | 44.688   | 26.985    | 70.574   |
| AMK58_13175 | <a href="#">K02259 cytochrome c oxidase assembly protein subunit 15</a>   (GenBank) heme A synthase                    | Energy                         | 14.270   | 11.989   | 23.639   | 157.407  | 2690.660  | 397.699  |
| AMK58_13180 | <a href="#">K05973 poly(3-hydroxybutyrate) depolymerase</a> [EC:3.1.1.75]   (GenBank) poly(3-hydroxybutyrate) depol    | Metabolism: Carbohydrate       | 2993.849 | 2487.016 | 2838.941 | 128.978  | 5076.577  | 293.501  |
| AMK58_13185 | no KO assigned   (GenBank) endonuclease                                                                                | DNA Repair and Replication     | 859.140  | 736.702  | 723.989  | 21.744   | 1506.567  | 111.027  |
| AMK58_13190 | no KO assigned   (GenBank) phospholipase                                                                               | No COG                         | 20.128   | 18.406   | 14.939   | 10.455   | 13.390    | 37.471   |
| AMK58_13195 | <a href="#">K05846 osmoprotectant transport system permease protein</a>   (GenBank) hypothetical protein               | Membrane Transport             | 82.441   | 90.677   | 83.305   | 140.238  | 101.779   | 195.113  |
| AMK58_13200 | no KO assigned   (GenBank) pseudogene                                                                                  | Pseudogene                     | 144.783  | 188.137  | 191.521  | 1228.394 | 584.651   | 781.189  |
| AMK58_13205 | <a href="#">K02031 peptide/nickel transport system ATP-binding protein</a> K02032 peptide/nickel transport system AT   | Quorum sensing                 | 77.235   | 72.590   | 75.800   | 104.793  | 287.042   | 79.458   |
| AMK58_13210 | no KO assigned   (GenBank) mechanosensitive ion channel protein                                                        | Transport: Ion                 | 224.794  | 188.500  | 198.810  | 102.503  | 332.459   | 103.863  |
| AMK58_13215 | no KO assigned   (GenBank) transcriptional regulator                                                                   | Transcription                  | 15.458   | 20.017   | 20.635   | 79.869   | 244.711   | 99.419   |
| AMK58_13220 | <a href="#">K00762 orotate phosphoribosyltransferase</a> [EC:2.4.2.10]   (GenBank) orotate phosphoribosyltransferase   | Metabolism: Nucleotide         | 19.243   | 27.469   | 25.906   | 642.128  | 237.924   | 350.862  |
| AMK58_13225 | no KO assigned   (GenBank) glycoside hydrolase                                                                         | hydrolase                      | 3.809    | 3.992    | 3.685    | 22.645   | 3.981     | 4.027    |
| AMK58_13230 | <a href="#">K00528 ferredoxin--NADP+ reductase</a> [EC:1.18.1.2]   (GenBank) ferredoxin-NADP reductase                 | Energy                         | 3.441    | 3.738    | 6.990    | 75.226   | 8.088     | 6.962    |
| AMK58_13235 | <a href="#">K07110 uncharacterized protein</a>   (GenBank) DNA-binding protein                                         | No COG                         | 9.985    | 12.031   | 11.009   | 157.240  | 16.505    | 52.439   |
| AMK58_13240 | <a href="#">K01637 isocitrate lyase</a> [EC:4.1.3.11]   (GenBank) isocitrate lyase                                     | Metabolism: Carbohydrate       | 67.737   | 55.469   | 62.784   | 329.829  | 64.319    | 283.046  |
| AMK58_13245 | no KO assigned   (GenBank) peptidase C56                                                                               | peptidase                      | 135.458  | 179.556  | 153.696  | 517.614  | 125.717   | 465.003  |
| AMK58_13250 | no KO assigned   (GenBank) hypothetical protein                                                                        | Hypothetical                   | 58.647   | 81.854   | 65.134   | 111.280  | 38.535    | 88.528   |
| AMK58_13255 | no KO assigned   (GenBank) molybdopterin-binding protein                                                               | No COG                         | 224.329  | 241.119  | 240.371  | 449.814  | 323.050   | 425.264  |
| AMK58_13260 | <a href="#">K00174 2-oxoglutarate/2-oxoacid ferredoxin oxidoreductase subunit alpha</a> [EC:1.2.7.3 1.2.7.11]   (Gen   | Metabolism: Carbohydrate       | 219.299  | 165.506  | 139.854  | 30.327   | 208.091   | 126.091  |
| AMK58_13265 | <a href="#">K00175 2-oxoglutarate/2-oxoacid ferredoxin oxidoreductase subunit beta</a> [EC:1.2.7.3 1.2.7.11]   (GenB   | Metabolism: Carbohydrate       | 93.643   | 82.375   | 108.154  | 222.789  | 126.891   | 465.060  |
| AMK58_13270 | no KO assigned   (GenBank) rubrerythrin                                                                                | No COG                         | 284.775  | 293.948  | 212.129  | 314.349  | 168.205   | 573.963  |
| AMK58_13275 | <a href="#">K06938 uncharacterized protein</a>   (GenBank) hypothetical protein                                        | Hypothetical                   | 4169.184 | 3658.711 | 4202.119 | 553.156  | 13715.170 | 791.311  |
| AMK58_13280 | no KO assigned   (GenBank) hypothetical protein                                                                        | Hypothetical                   | 425.314  | 411.138  | 476.219  | 890.636  | 370.476   | 802.440  |
| AMK58_13285 | no KO assigned   (GenBank) hypothetical protein                                                                        | Hypothetical                   | 41.894   | 41.934   | 51.303   | 374.320  | 106.754   | 257.081  |
| AMK58_13290 | no KO assigned   (GenBank) hypothetical protein                                                                        | Hypothetical                   | 78.304   | 81.246   | 64.650   | 557.661  | 248.765   | 590.839  |
| AMK58_13295 | <a href="#">K14219 tRNA Arg</a>   (GenBank) tRNA-Arg                                                                   | tRNA synthesis/modification    | 234.288  | 234.856  | 251.169  | 2262.177 | 813.024   | 2356.205 |
| AMK58_13300 | <a href="#">K00769 xanthine phosphoribosyltransferase</a> [EC:2.4.2.22]   (GenBank) xanthine phosphoribosyltransferase | Metabolism: Nucleotide         | 21.267   | 20.214   | 26.195   | 210.097  | 135.822   | 256.808  |
| AMK58_13305 | <a href="#">K02034 peptide/nickel transport system permease protein</a>   (GenBank) peptide ABC transporter permease   | Quorum sensing                 | 6.869    | 9.405    | 10.342   | 36.425   | 31.530    | 68.344   |
| AMK58_13310 | <a href="#">K02033 peptide/nickel transport system permease protein</a>   (GenBank) peptide ABC transporter            | Quorum sensing                 | 7.152    | 6.867    | 7.893    | 144.564  | 109.391   | 139.982  |
| AMK58_13315 | <a href="#">K02035 peptide/nickel transport system substrate-binding protein</a>   (GenBank) ABC transporter substr    | Quorum sensing                 | 2.002    | 1.914    | 3.883    | 44.515   | 284.338   | 79.450   |
| AMK58_13320 | <a href="#">K01470 creatinine amidohydrolase</a> [EC:3.5.2.10]   (GenBank) amidase                                     | Metabolism: Amino Acid         | 0.000    | 0.000    | 2.620    | 164.357  | 17.308    | 100.246  |
| AMK58_13325 | no KO assigned   (GenBank) pseudogene                                                                                  | Pseudogene                     | 1.456    | 0.621    | 0.494    | 9.335    | 5.378     | 56.617   |
| AMK58_13330 | no KO assigned   (GenBank) hypothetical protein                                                                        | Hypothetical                   | 1082.491 | 1115.684 | 1070.216 | 142.943  | 505.928   | 336.175  |
| AMK58_13335 | no KO assigned   (GenBank) hypothetical protein                                                                        | Hypothetical                   | 140.094  | 169.060  | 121.735  | 457.352  | 195.015   | 320.033  |
| AMK58_13340 | no KO assigned   (GenBank) hypothetical protein                                                                        | Hypothetical                   | 44.106   | 43.057   | 47.692   | 396.969  | 132.205   | 123.497  |
| AMK58_13345 | <a href="#">K07483 transposase</a>   (GenBank) hypothetical protein                                                    | Genetic Information Processing | 738.890  | 661.716  | 660.708  | 717.845  | 558.016   | 558.253  |
| AMK58_13350 | no KO assigned   (GenBank) pseudogene                                                                                  | Pseudogene                     | 1049.315 | 1094.307 | 1088.464 | 1418.087 | 1138.472  | 819.713  |
| AMK58_13355 | no KO assigned   (GenBank) hypothetical protein                                                                        | Hypothetical                   | 440.578  | 602.796  | 578.792  | 1487.605 | 426.425   | 855.121  |
| AMK58_13360 | no KO assigned   (GenBank) pseudogene                                                                                  | Pseudogene                     | 2.547    | 3.803    | 4.567    | 39.849   | 9.043     | 30.214   |
| AMK58_13365 | no KO assigned   (GenBank) hypothetical protein                                                                        | Hypothetical                   | 7.677    | 5.897    | 9.072    | 50.830   | 12.451    | 111.660  |
| AMK58_13370 | no KO assigned   (GenBank) hypothetical protein                                                                        | Hypothetical                   | 10.025   | 11.359   | 16.187   | 94.811   | 12.337    | 39.106   |
| AMK58_13375 | no KO assigned   (GenBank) hypothetical protein                                                                        | Hypothetical                   | 2.018    | 1.855    | 3.468    | 74.959   | 8.462     | 40.878   |
| AMK58_13380 | no KO assigned   (GenBank) transposase                                                                                 | Genetic Information Processing | 0.809    | 0.000    | 0.979    | 4.727    | 3.801     | 12.134   |
| AMK58_13385 | <a href="#">K07484 transposase</a>   (GenBank) transposase                                                             | Genetic Information Processing | 4.175    | 4.157    | 3.970    | 18.176   | 20.727    | 100.978  |
| AMK58_13390 | no KO assigned   (GenBank) transposase                                                                                 | Genetic Information Processing | 313.049  | 375.600  | 350.731  | 248.526  | 140.663   | 479.422  |
| AMK58_13395 | no KO assigned   (GenBank) hypothetical protein                                                                        | Hypothetical                   | 72.895   | 95.326   | 82.100   | 58.253   | 388.235   | 41.775   |

|                             |                                                                                                                                     |                                     |          |          |          |          |          |          |
|-----------------------------|-------------------------------------------------------------------------------------------------------------------------------------|-------------------------------------|----------|----------|----------|----------|----------|----------|
| <a href="#">AMK58_13400</a> | <a href="#">no KO assigned   (GenBank) hypothetical protein</a>                                                                     | Hypothetical                        | 891.758  | 1048.934 | 799.545  | 408.061  | 217.595  | 476.353  |
| <a href="#">AMK58_13405</a> | <a href="#">no KO assigned   (GenBank) pseudogene</a>                                                                               | Pseudogene                          | 2039.847 | 2358.768 | 2028.763 | 1051.270 | 347.136  | 1956.177 |
| <a href="#">AMK58_13410</a> | <a href="#">K07483 transposase   (GenBank) transposase</a>                                                                          | Genetic Information Processing      | 79.882   | 104.762  | 104.533  | 705.415  | 324.434  | 626.904  |
| <a href="#">AMK58_13415</a> | <a href="#">no KO assigned   (GenBank) integrase</a>                                                                                | Genetic Information Processing      | 2.640    | 3.380    | 3.766    | 100.166  | 40.701   | 72.136   |
| <a href="#">AMK58_13420</a> | <a href="#">no KO assigned   (GenBank) hypothetical protein</a>                                                                     | Hypothetical                        | 7.338    | 6.263    | 6.977    | 30.190   | 40.062   | 112.270  |
| <a href="#">AMK58_13425</a> | <a href="#">no KO assigned   (GenBank) pseudogene</a>                                                                               | Pseudogene                          | 25.600   | 32.749   | 31.787   | 40.748   | 38.052   | 63.955   |
| <a href="#">AMK58_13430</a> | <a href="#">no KO assigned   (GenBank) transposase</a>                                                                              | Genetic Information Processing      | 288.074  | 272.159  | 262.789  | 58.785   | 99.906   | 232.024  |
| <a href="#">AMK58_13435</a> | <a href="#">no KO assigned   (GenBank) ATP-binding protein</a>                                                                      | No COG                              | 67.161   | 69.022   | 77.478   | 95.124   | 36.880   | 69.133   |
| <a href="#">AMK58_13440</a> | <a href="#">no KO assigned   (GenBank) transposase</a>                                                                              | Genetic Information Processing      | 99.787   | 108.636  | 98.041   | 164.859  | 96.212   | 254.355  |
| <a href="#">AMK58_13445</a> | <a href="#">no KO assigned   (GenBank) hypothetical protein</a>                                                                     | Hypothetical                        | 5.144    | 21.275   | 17.682   | 777.538  | 145.433  | 1224.693 |
| <a href="#">AMK58_13450</a> | <a href="#">no KO assigned   (GenBank) hypothetical protein</a>                                                                     | Hypothetical                        | 3.363    | 2.870    | 5.482    | 157.681  | 34.563   | 321.662  |
| <a href="#">AMK58_13455</a> | <a href="#">no KO assigned   (GenBank) hypothetical protein</a>                                                                     | Hypothetical                        | 10.317   | 23.568   | 24.524   | 982.464  | 99.597   | 957.247  |
| <a href="#">AMK58_13460</a> | <a href="#">no KO assigned   (GenBank) hypothetical protein</a>                                                                     | Hypothetical                        | 3.459    | 8.611    | 12.882   | 780.809  | 20.414   | 426.357  |
| <a href="#">AMK58_13465</a> | <a href="#">no KO assigned   (GenBank) hypothetical protein</a>                                                                     | Hypothetical                        | 3.972    | 2.848    | 9.367    | 167.081  | 13.395   | 180.633  |
| <a href="#">AMK58_13470</a> | <a href="#">no KO assigned   (GenBank) hypothetical protein</a>                                                                     | Hypothetical                        | 6.647    | 8.510    | 14.898   | 393.698  | 103.004  | 671.857  |
| <a href="#">AMK58_13475</a> | <a href="#">no KO assigned   (GenBank) hypothetical protein</a>                                                                     | Hypothetical                        | 25.024   | 28.664   | 30.054   | 10.712   | 32.887   | 62.634   |
| <a href="#">AMK58_13480</a> | <a href="#">no KO assigned   (GenBank) hypothetical protein</a>                                                                     | Hypothetical                        | 50.228   | 44.370   | 55.190   | 55.109   | 20.870   | 168.812  |
| <a href="#">AMK58_13485</a> | <a href="#">no KO assigned   (GenBank) hypothetical protein</a>                                                                     | Hypothetical                        | 40.358   | 75.350   | 49.765   | 199.353  | 192.799  | 849.624  |
| <a href="#">AMK58_13490</a> | <a href="#">K07484 transposase   (GenBank) hypothetical protein</a>                                                                 | Hypothetical                        | 11.283   | 10.371   | 19.805   | 144.747  | 178.531  | 418.496  |
| <a href="#">AMK58_13495</a> | <a href="#">no KO assigned   (GenBank) hypothetical protein</a>                                                                     | Hypothetical                        | 35.932   | 42.001   | 45.552   | 153.117  | 123.508  | 455.839  |
| <a href="#">AMK58_13500</a> | <a href="#">no KO assigned   (GenBank) hypothetical protein</a>                                                                     | Hypothetical                        | 18.345   | 23.290   | 25.618   | 16.126   | 24.744   | 44.759   |
| <a href="#">AMK58_13505</a> | <a href="#">K06871 uncharacterized protein   (GenBank) FxsB family radical SAM/SPASM domain protein</a>                             | No COG                              | 46.580   | 60.706   | 47.871   | 60.179   | 83.157   | 106.394  |
| <a href="#">AMK58_13510</a> | <a href="#">no KO assigned   (GenBank) hypothetical protein</a>                                                                     | Hypothetical                        | 69.186   | 95.682   | 117.555  | 700.231  | 528.531  | 2174.705 |
| <a href="#">AMK58_13515</a> | <a href="#">no KO assigned   (GenBank) hypothetical protein</a>                                                                     | Hypothetical                        | 1.953    | 7.778    | 11.141   | 99.404   | 58.535   | 288.521  |
| <a href="#">AMK58_13520</a> | <a href="#">no KO assigned   (GenBank) hypothetical protein</a>                                                                     | Hypothetical                        | 0.651    | 0.000    | 4.951    | 286.005  | 68.778   | 310.854  |
| <a href="#">AMK58_13525</a> | <a href="#">no KO assigned   (GenBank) hypothetical protein</a>                                                                     | Hypothetical                        | 3.232    | 4.208    | 4.846    | 10.102   | 8.058    | 32.428   |
| <a href="#">AMK58_13530</a> | <a href="#">no KO assigned   (GenBank) pseudogene</a>                                                                               | Pseudogene                          | 187.666  | 226.049  | 308.423  | 279.095  | 294.302  | 827.521  |
| <a href="#">AMK58_13535</a> | <a href="#">no KO assigned   (GenBank) pseudogene</a>                                                                               | Pseudogene                          | 753.021  | 860.853  | 1052.138 | 151.761  | 349.668  | 443.615  |
| <a href="#">AMK58_13540</a> | <a href="#">no KO assigned   (GenBank) hypothetical protein</a>                                                                     | Hypothetical                        | 559.931  | 748.037  | 770.481  | 129.834  | 70.726   | 239.273  |
| <a href="#">AMK58_13545</a> | <a href="#">no KO assigned   (GenBank) hypothetical protein</a>                                                                     | Hypothetical                        | 1.510    | 1.203    | 1.675    | 25.818   | 4.186    | 25.758   |
| <a href="#">AMK58_13550</a> | <a href="#">no KO assigned   (GenBank) AAA family ATPase</a>                                                                        | Enzyme                              | 2.907    | 2.672    | 5.740    | 35.792   | 10.430   | 59.297   |
| <a href="#">AMK58_13555</a> | <a href="#">K00449 protocatechuate 3,4-dioxygenase, beta subunit [EC:1.13.11.31]   (GenBank) hypothetical protein</a>               | Metabolism                          | 673.111  | 697.911  | 783.272  | 141.811  | 56.307   | 607.046  |
| <a href="#">AMK58_13560</a> | <a href="#">no KO assigned   (GenBank) 3'-5' exonuclease</a>                                                                        | DNA Repair and Replication          | 154.389  | 174.482  | 223.959  | 30.471   | 39.096   | 102.880  |
| <a href="#">AMK58_13565</a> | <a href="#">no KO assigned   (GenBank) hypothetical protein</a>                                                                     | Hypothetical                        | 14.980   | 15.267   | 20.359   | 133.856  | 66.759   | 200.762  |
| <a href="#">AMK58_13570</a> | <a href="#">K07286 uncharacterized lipoprotein   (GenBank) hypothetical protein</a>                                                 | Hypothetical                        | 104.969  | 87.378   | 108.078  | 45.878   | 47.653   | 248.058  |
| <a href="#">AMK58_13575</a> | <a href="#">K07337 penicillin-binding protein activator   (GenBank) penicillin-binding protein activator LpoB</a>                   | No COG                              | 363.618  | 371.675  | 318.215  | 316.988  | 388.142  | 940.692  |
| <a href="#">AMK58_13580</a> | <a href="#">no KO assigned   (GenBank) hypothetical protein</a>                                                                     | Hypothetical                        | 1021.682 | 1207.765 | 947.916  | 246.445  | 639.188  | 1142.251 |
| <a href="#">AMK58_13585</a> | <a href="#">no KO assigned   (GenBank) hypothetical protein</a>                                                                     | Hypothetical                        | 3.260    | 4.637    | 3.985    | 243.279  | 19.891   | 144.943  |
| <a href="#">AMK58_13590</a> | <a href="#">no KO assigned   (GenBank) hypothetical protein</a>                                                                     | Hypothetical                        | 35.358   | 34.141   | 47.542   | 510.957  | 78.685   | 548.764  |
| <a href="#">AMK58_13595</a> | <a href="#">no KO assigned   (GenBank) hypothetical protein</a>                                                                     | Hypothetical                        | 77.697   | 97.596   | 107.157  | 241.624  | 51.536   | 289.712  |
| <a href="#">AMK58_13600</a> | <a href="#">no KO assigned   (GenBank) hypothetical protein</a>                                                                     | Hypothetical                        | 207.893  | 253.270  | 210.593  | 32.695   | 8.303    | 112.766  |
| <a href="#">AMK58_13605</a> | <a href="#">no KO assigned   (GenBank) hypothetical protein</a>                                                                     | Hypothetical                        | 191.137  | 252.692  | 225.940  | 333.454  | 23.952   | 450.875  |
| <a href="#">AMK58_13610</a> | <a href="#">no KO assigned   (GenBank) hypothetical protein</a>                                                                     | Hypothetical                        | 51.930   | 53.957   | 66.012   | 78.258   | 11.738   | 168.535  |
| <a href="#">AMK58_13615</a> | <a href="#">no KO assigned   (GenBank) hypothetical protein</a>                                                                     | Hypothetical                        | 55.652   | 60.914   | 67.557   | 82.800   | 50.617   | 113.353  |
| <a href="#">AMK58_13620</a> | <a href="#">no KO assigned   (GenBank) hypothetical protein</a>                                                                     | Hypothetical                        | 14.603   | 13.484   | 18.050   | 43.036   | 13.132   | 93.804   |
| <a href="#">AMK58_13625</a> | <a href="#">K07497 putative transposase   (GenBank) hypothetical protein</a>                                                        | Genetic Information Processing      | 5.077    | 6.445    | 6.818    | 56.442   | 9.130    | 127.157  |
| <a href="#">AMK58_13630</a> | <a href="#">no KO assigned   (GenBank) hypothetical protein</a>                                                                     | Hypothetical                        | 132.934  | 125.702  | 133.669  | 215.735  | 35.690   | 287.857  |
| <a href="#">AMK58_13635</a> | <a href="#">no KO assigned   (GenBank) hypothetical protein</a>                                                                     | Hypothetical                        | 89.232   | 141.574  | 133.777  | 310.980  | 21.642   | 168.920  |
| <a href="#">AMK58_13640</a> | <a href="#">no KO assigned   (GenBank) hypothetical protein</a>                                                                     | Hypothetical                        | 40.045   | 41.121   | 65.145   | 599.711  | 106.554  | 454.010  |
| <a href="#">AMK58_13645</a> | <a href="#">K07391 magnesium chelatase family protein   (GenBank) hypothetical protein</a>                                          | No COG                              | 54.564   | 38.579   | 62.011   | 320.047  | 76.938   | 514.345  |
| <a href="#">AMK58_13650</a> | <a href="#">no KO assigned   (GenBank) hypothetical protein</a>                                                                     | Hypothetical                        | 77.987   | 76.878   | 88.795   | 472.193  | 107.823  | 385.983  |
| <a href="#">AMK58_13655</a> | <a href="#">no KO assigned   (GenBank) cell envelope biogenesis protein LolA</a>                                                    | Membrane                            | 21.366   | 29.458   | 26.219   | 146.285  | 53.780   | 175.601  |
| <a href="#">AMK58_13660</a> | <a href="#">K03466 DNA segregation ATPase FtsK/SpoIIIE, S-DNA-T family   (GenBank) cell division protein FtsK</a>                   | Cell Cycle/Shape/Homeostasis        | 7.525    | 9.164    | 7.884    | 8.347    | 9.375    | 55.468   |
| <a href="#">AMK58_13665</a> | <a href="#">no KO assigned   (GenBank) aspartate aminotransferase</a>                                                               | tRNA synthesis/modification         | 11.103   | 16.151   | 13.495   | 36.472   | 42.109   | 107.614  |
| <a href="#">AMK58_13670</a> | <a href="#">K04752 nitrogen regulatory protein P-II 2   (GenBank) transcriptional regulator</a>                                     | Nitrogen                            | 1.429    | 0.000    | 2.038    | 112.908  | 105.181  | 80.476   |
| <a href="#">AMK58_13675</a> | <a href="#">K03185 2-octaprenyl-6-methoxyphenol hydroxylase [EC:1.14.13.1]   (GenBank) 2-octaprenyl-6-methoxyphenol hydroxylase</a> | Metabolism: Co-Factors and Vitamins | 4.452    | 5.204    | 6.718    | 105.920  | 239.985  | 101.859  |
| <a href="#">AMK58_13680</a> | <a href="#">K01975 2'-5' RNA ligase [EC:6.5.1.-1]   (GenBank) 2'-5' RNA ligase</a>                                                  | tRNA synthesis/modification         | 52.082   | 71.393   | 48.234   | 95.439   | 112.017  | 229.557  |
| <a href="#">AMK58_13685</a> | <a href="#">no KO assigned   (GenBank) aldo/keto reductase</a>                                                                      | Oxidoreductases                     | 174.306  | 190.539  | 202.892  | 394.901  | 128.402  | 411.763  |
| <a href="#">AMK58_13690</a> | <a href="#">no KO assigned   (GenBank) histidine kinase</a>                                                                         | Signal Transduction                 | 144.548  | 153.159  | 172.874  | 267.552  | 118.156  | 188.262  |
| <a href="#">AMK58_13695</a> | <a href="#">K10804 acyl-CoA thioesterase I [EC:3.1.2.-3.1.1.51]   (GenBank) acyl-CoA thioesterase</a>                               | Lipid metabolism                    | 173.088  | 210.979  | 156.469  | 66.412   | 38.716   | 189.374  |
| <a href="#">AMK58_13700</a> | <a href="#">K02003 putative ABC transport system ATP-binding protein   (GenBank) ABC transporter</a>                                | Membrane Transport                  | 231.113  | 226.356  | 219.431  | 301.423  | 136.464  | 231.566  |
| <a href="#">AMK58_13705</a> | <a href="#">K02004 putative ABC transport system permease protein   (GenBank) glycosyl transferase family 1</a>                     | Membrane Transport                  | 13.705   | 14.032   | 13.535   | 55.025   | 15.786   | 37.957   |
| <a href="#">AMK58_13710</a> | <a href="#">no KO assigned   (GenBank) diguanylate cyclase</a>                                                                      | cyclic nucleotide                   | 133.418  | 145.569  | 117.466  | 178.002  | 122.339  | 175.272  |
| <a href="#">AMK58_13715</a> | <a href="#">K03686 molecular chaperone DnaJ   (GenBank) molecular chaperone DnaJ</a>                                                | Chaperone                           | 80.822   | 82.904   | 82.084   | 182.193  | 188.244  | 144.291  |
| <a href="#">AMK58_13720</a> | <a href="#">K04043 molecular chaperone DnaK   (GenBank) dnaK: Fe-S protein assembly chaperone HscA</a>                              | Chaperone                           | 20.494   | 28.256   | 28.420   | 75.856   | 85.129   | 53.913   |
| <a href="#">AMK58_13725</a> | <a href="#">no KO assigned   (GenBank) hypothetical protein</a>                                                                     | Hypothetical                        | 151.343  | 141.834  | 158.571  | 779.923  | 1450.326 | 484.301  |
| <a href="#">AMK58_13730</a> | <a href="#">no KO assigned   (GenBank) hypothetical protein</a>                                                                     | Hypothetical                        | 84.236   | 109.344  | 100.394  | 791.128  | 319.661  | 470.836  |

|                             |                                                                                                                        |                                       |          |          |          |          |           |          |
|-----------------------------|------------------------------------------------------------------------------------------------------------------------|---------------------------------------|----------|----------|----------|----------|-----------|----------|
| <a href="#">AMK58_13735</a> | <a href="#">no KO assigned   (GenBank) DNA repair photolyase</a>                                                       | DNA Repair and Replication            | 210.957  | 228.041  | 222.173  | 253.267  | 67.662    | 296.849  |
| <a href="#">AMK58_13740</a> | <a href="#">no KO assigned   (GenBank) chemotaxis protein</a>                                                          | Chemotaxis                            | 184.355  | 171.669  | 165.479  | 156.374  | 872.414   | 141.115  |
| <a href="#">AMK58_13745</a> | <a href="#">K03413 two-component system, chemotaxis family, response regulator CheY   (GenBank) Fis family trans</a>   | Chemotaxis                            | 3886.633 | 3587.132 | 3778.795 | 558.788  | 21236.860 | 1265.028 |
| <a href="#">AMK58_13750</a> | <a href="#">K03687 molecular chaperone GrpE   (GenBank) molecular chaperone GrpE</a>                                   | Chaperone                             | 205.569  | 273.188  | 224.945  | 55.127   | 41.565    | 129.230  |
| <a href="#">AMK58_13755</a> | <a href="#">K03705 heat-inducible transcriptional repressor   (GenBank) hrcA: heat-inducible transcription repre</a>   | Transcription                         | 58.502   | 59.064   | 62.149   | 75.406   | 55.169    | 71.180   |
| <a href="#">AMK58_13760</a> | <a href="#">K00989 ribonuclease PH [EC:2.7.7.56]   (GenBank) ribonuclease PH</a>                                       | post translation modificaton          | 22.870   | 29.135   | 25.582   | 220.753  | 115.868   | 135.347  |
| <a href="#">AMK58_13765</a> | <a href="#">K02428 XTP/dTTP diphosphohydrolase [EC:3.6.1.66]   (GenBank) non-canonical purine NTP pyrophosph</a>       | Metabolism: Nucleotide                | 95.173   | 98.367   | 151.010  | 271.117  | 323.645   | 535.469  |
| <a href="#">AMK58_13770</a> | <a href="#">no KO assigned   (GenBank) coproporphyrinogen III oxidase</a>                                              | Biosynthesis: Co-Factors and Vitamins | 16.704   | 14.876   | 14.501   | 70.739   | 47.930    | 47.236   |
| <a href="#">AMK58_13775</a> | <a href="#">K03406 methyl-accepting chemotaxis protein   (GenBank) chemotaxis protein</a>                              | Chemotaxis                            | 78.713   | 98.328   | 72.528   | 70.357   | 434.823   | 76.107   |
| <a href="#">AMK58_13780</a> | <a href="#">K00287 dihydrofolate reductase [EC:1.5.1.3]   (GenBank) dihydrofolate reductase</a>                        | Metabolism: Co-Factors and Vitamins   | 113.433  | 134.113  | 142.139  | 413.942  | 1631.508  | 574.413  |
| <a href="#">AMK58_13785</a> | <a href="#">no KO assigned   (GenBank) hypothetical protein</a>                                                        | Hypothetical                          | 180.367  | 125.024  | 134.069  | 418.480  | 215.621   | 496.204  |
| <a href="#">AMK58_13790</a> | <a href="#">no KO assigned   (GenBank) hypothetical protein</a>                                                        | Hypothetical                          | 98.217   | 72.549   | 103.573  | 390.394  | 244.486   | 314.951  |
| <a href="#">AMK58_13795</a> | <a href="#">K01920 glutathione synthase [EC:6.3.2.3]   (GenBank) glutathione synthetase</a>                            | Metabolism: Amino Acid                | 23.026   | 17.385   | 20.450   | 250.312  | 84.045    | 148.520  |
| <a href="#">AMK58_13800</a> | <a href="#">no KO assigned   (GenBank) hypothetical protein</a>                                                        | Hypothetical                          | 9.291    | 14.745   | 15.460   | 449.414  | 127.281   | 355.924  |
| <a href="#">AMK58_13805</a> | <a href="#">K07460 putative endonuclease   (GenBank) hypothetical protein</a>                                          | DNA Repair and Replication            | 30.515   | 41.167   | 45.860   | 336.239  | 96.630    | 130.525  |
| <a href="#">AMK58_13810</a> | <a href="#">K07056 16S rRNA (cvtidine)402-2'-O-methyltransferase [EC:2.1.1.198]   (GenBank) 16S rRNA methyl</a>        | Ribosome                              | 10.311   | 7.040    | 7.563    | 29.596   | 25.993    | 55.998   |
| <a href="#">AMK58_13815</a> | <a href="#">no KO assigned   (GenBank) ABC transporter substrate-binding protein</a>                                   | Membrane Transport                    | 23.280   | 27.938   | 22.908   | 15.660   | 8.913     | 45.907   |
| <a href="#">AMK58_13820</a> | <a href="#">no KO assigned   (GenBank) hypothetical protein</a>                                                        | Hypothetical                          | 38.950   | 47.663   | 46.405   | 28.917   | 31.913    | 60.704   |
| <a href="#">AMK58_13825</a> | <a href="#">K10764 O-succinylhomoserine sulflhydrlyase [EC:2.5.1.-]   (GenBank) O-succinylhomoserine sulflhydrlyas</a> | Energy                                | 6.910    | 6.581    | 7.237    | 43.330   | 11.594    | 45.131   |
| <a href="#">AMK58_13830</a> | <a href="#">no KO assigned   (GenBank) hypothetical protein</a>                                                        | Hypothetical                          | 12.653   | 3.910    | 15.142   | 80.362   | 22.314    | 28.320   |
| <a href="#">AMK58_13835</a> | <a href="#">no KO assigned   (GenBank) hypothetical protein</a>                                                        | Hypothetical                          | 52.267   | 71.150   | 61.648   | 325.258  | 53.545    | 96.932   |
| <a href="#">AMK58_13840</a> | <a href="#">no KO assigned   (GenBank) pseudogene</a>                                                                  | Pseudogene                            | 0.000    | 0.000    | 0.000    | 0.000    | 0.000     | 0.000    |
| <a href="#">AMK58_13845</a> | <a href="#">no KO assigned   (GenBank) pseudogene</a>                                                                  | Pseudogene                            | 8.810    | 1.350    | 13.316   | 19.063   | 18.027    | 51.317   |
| <a href="#">AMK58_13850</a> | <a href="#">no KO assigned   (GenBank) hypothetical protein</a>                                                        | Hypothetical                          | 0.000    | 0.000    | 0.000    | 0.000    | 0.000     | 0.000    |
| <a href="#">AMK58_13855</a> | <a href="#">no KO assigned   (GenBank) hypothetical protein</a>                                                        | Hypothetical                          | 0.000    | 0.000    | 0.000    | 0.000    | 0.000     | 0.000    |
| <a href="#">AMK58_13860</a> | <a href="#">K01978 M1 RNA   (GenBank) bacterial RNase P</a>                                                            | post translation modificaton          | 0.000    | 0.000    | 0.000    | 0.000    | 0.000     | 0.000    |
| <a href="#">AMK58_13865</a> | <a href="#">no KO assigned   (GenBank) hypothetical protein</a>                                                        | Hypothetical                          | 0.000    | 0.000    | 0.000    | 0.000    | 0.000     | 0.000    |
| <a href="#">AMK58_13870</a> | <a href="#">K03408 purine-binding chemotaxis protein CheW   (GenBank) hypothetical protein</a>                         | Chemotaxis                            | 0.000    | 0.000    | 0.000    | 0.000    | 0.000     | 0.000    |
| <a href="#">AMK58_13875</a> | <a href="#">K01579 aspartate 1-decarboxylase [EC:4.1.1.1]   (GenBank) aspartate decarboxylase</a>                      | Metabolism                            | 0.000    | 0.000    | 0.000    | 0.000    | 0.000     | 0.000    |
| <a href="#">AMK58_13880</a> | <a href="#">no KO assigned   (GenBank) hypothetical protein</a>                                                        | Hypothetical                          | 0.000    | 0.000    | 0.000    | 0.000    | 0.000     | 0.000    |
| <a href="#">AMK58_13885</a> | <a href="#">no KO assigned   (GenBank) hypothetical protein</a>                                                        | Hypothetical                          | 0.000    | 0.000    | 0.000    | 0.000    | 0.000     | 0.000    |
| <a href="#">AMK58_13890</a> | <a href="#">no KO assigned   (GenBank) endonuclease</a>                                                                | DNA Repair and Replication            | 0.000    | 0.000    | 0.000    | 0.000    | 0.000     | 0.000    |
| <a href="#">AMK58_13895</a> | <a href="#">no KO assigned   (GenBank) hypothetical protein</a>                                                        | Hypothetical                          | 0.000    | 0.000    | 0.000    | 0.000    | 0.000     | 0.000    |
| <a href="#">AMK58_13900</a> | <a href="#">K03411 chemotaxis protein CheD [EC:3.5.1.44]   (GenBank) chemotaxis protein</a>                            | Chemotaxis                            | 0.000    | 0.000    | 0.000    | 0.000    | 0.000     | 0.000    |
| <a href="#">AMK58_13905</a> | <a href="#">K07259 D-alanyl-D-alanine carboxypeptidase / D-alanyl-D-alanine-endopeptidase (penicillin-binding pr</a>   | Cell Wall                             | 0.000    | 0.000    | 0.000    | 0.000    | 0.000     | 0.000    |
| <a href="#">AMK58_13910</a> | <a href="#">no KO assigned   (GenBank) hypothetical protein</a>                                                        | Hypothetical                          | 0.000    | 0.000    | 0.000    | 0.000    | 0.000     | 0.000    |
| <a href="#">AMK58_13915</a> | <a href="#">K06133 4'-phosphopantetheinyl transferase [EC:2.7.8.-]   (GenBank) 4-phosphopantetheinyl transferase</a>   | Metabolism: Co-Factors and Vitamins   | 5.503    | 5.978    | 8.087    | 17.202   | 17.996    | 11.443   |
| <a href="#">AMK58_13920</a> | <a href="#">K01923 phosphoribosylaminoimidazole-succinocarboxamide synthase [EC:6.3.2.6]   (GenBank) phosphori</a>     | Metabolism: Nucleotide                | 0.000    | 0.000    | 0.000    | 0.000    | 0.000     | 0.000    |
| <a href="#">AMK58_13925</a> | <a href="#">no KO assigned   (GenBank) hydroxycacid dehydrogenase</a>                                                  | dehydrogenase                         | 0.256    | 0.765    | 0.122    | 7.380    | 11.089    | 11.643   |
| <a href="#">AMK58_13930</a> | <a href="#">K02806 PTS system, nitrogen regulatory IIA component [EC:2.7.1.-]   (GenBank) transcriptional regula</a>   | Nitrogen                              | 58.433   | 78.401   | 76.981   | 215.584  | 100.191   | 202.269  |
| <a href="#">AMK58_13935</a> | <a href="#">K05559 multicomponent K+H+ antiporter subunit A   (GenBank) cation:proton antiporter</a>                   | Transport: Ion                        | 2.235    | 2.428    | 2.744    | 42.574   | 10.873    | 19.861   |
| <a href="#">AMK58_13940</a> | <a href="#">K05560 multicomponent K+H+ antiporter subunit C   (GenBank) cation:proton antiporter</a>                   | Transport: Ion                        | 502.899  | 438.207  | 423.437  | 352.578  | 196.842   | 406.123  |
| <a href="#">AMK58_13945</a> | <a href="#">K05561 multicomponent K+H+ antiporter subunit D   (GenBank) cation:proton antiporter</a>                   | Transport: Ion                        | 51.932   | 44.766   | 56.219   | 94.310   | 39.027    | 103.189  |
| <a href="#">AMK58_13950</a> | <a href="#">K05562 multicomponent K+H+ antiporter subunit E   (GenBank) cation:proton antiporter</a>                   | Transport: Ion                        | 366.443  | 387.565  | 373.371  | 229.183  | 953.209   | 340.942  |
| <a href="#">AMK58_13955</a> | <a href="#">K05563 multicomponent K+H+ antiporter subunit F   (GenBank) cation:proton antiporter</a>                   | Transport: Ion                        | 1438.729 | 1310.761 | 1585.131 | 2402.882 | 2069.389  | 1574.562 |
| <a href="#">AMK58_13960</a> | <a href="#">K05564 multicomponent K+H+ antiporter subunit G   (GenBank) cation:proton antiporter</a>                   | Transport: Ion                        | 70.476   | 55.781   | 69.873   | 68.183   | 80.573    | 39.099   |
| <a href="#">AMK58_13965</a> | <a href="#">K06991 uncharacterized protein   (GenBank) dioxygenase</a>                                                 | No COG                                | 421.615  | 446.326  | 496.944  | 736.163  | 355.194   | 552.324  |
| <a href="#">AMK58_13970</a> | <a href="#">no KO assigned   (GenBank) hypothetical protein</a>                                                        | Hypothetical                          | 23.534   | 20.967   | 26.498   | 25.164   | 18.912    | 25.555   |
| <a href="#">AMK58_13975</a> | <a href="#">no KO assigned   (GenBank) hypothetical protein</a>                                                        | Hypothetical                          | 37.452   | 41.472   | 30.698   | 65.091   | 22.138    | 54.788   |
| <a href="#">AMK58_13980</a> | <a href="#">K07117 uncharacterized protein   (GenBank) hypothetical protein</a>                                        | Hypothetical                          | 100.200  | 91.459   | 132.850  | 82.771   | 43.487    | 76.653   |
| <a href="#">AMK58_13985</a> | <a href="#">no KO assigned   (GenBank) hypothetical protein</a>                                                        | Hypothetical                          | 162.161  | 179.596  | 147.459  | 44.448   | 55.069    | 95.680   |
| <a href="#">AMK58_13990</a> | <a href="#">K06160 putative ATP-binding cassette transporter   (GenBank) hypothetical protein</a>                      | Membrane transport                    | 2.545    | 1.738    | 4.702    | 140.074  | 44.874    | 192.173  |
| <a href="#">AMK58_13995</a> | <a href="#">no KO assigned   (GenBank) hypothetical protein</a>                                                        | Hypothetical                          | 2.278    | 3.266    | 4.764    | 127.162  | 17.818    | 131.024  |
| <a href="#">AMK58_14000</a> | <a href="#">K06159 putative ATP-binding cassette transporter   (GenBank) hypothetical protein</a>                      | Membrane transport                    | 0.070    | 0.000    | 0.601    | 56.130   | 2.998     | 11.325   |
| <a href="#">AMK58_14005</a> | <a href="#">K02030 polar amino acid transport system substrate-binding protein   (GenBank) hypothetical protein</a>    | Transport: Amino Acid                 | 7.309    | 9.493    | 13.899   | 333.311  | 37.685    | 265.646  |
| <a href="#">AMK58_14010</a> | <a href="#">no KO assigned   (GenBank) hypothetical protein</a>                                                        | Hypothetical                          | 19.475   | 33.644   | 31.680   | 713.178  | 88.883    | 541.331  |
| <a href="#">AMK58_14015</a> | <a href="#">K11891 type VI secretion system protein ImpL   (GenBank) hypothetical protein</a>                          | Secretion System                      | 2.118    | 1.746    | 2.639    | 25.245   | 14.164    | 49.107   |
| <a href="#">AMK58_14020</a> | <a href="#">no KO assigned   (GenBank) hypothetical protein</a>                                                        | Hypothetical                          | 9.633    | 9.923    | 12.475   | 468.314  | 60.673    | 485.424  |
| <a href="#">AMK58_14025</a> | <a href="#">K11918 type VI secretion svstem protein   (GenBank) hypothetical protein</a>                               | Secretion System                      | 18.487   | 12.445   | 15.349   | 249.383  | 36.292    | 413.346  |
| <a href="#">AMK58_14030</a> | <a href="#">no KO assigned   (GenBank) hypothetical protein</a>                                                        | Hypothetical                          | 60.537   | 42.100   | 58.473   | 251.002  | 19.082    | 281.862  |
| <a href="#">AMK58_14035</a> | <a href="#">no KO assigned   (GenBank) hypothetical protein</a>                                                        | Hypothetical                          | 2.471    | 2.812    | 5.221    | 130.820  | 7.935     | 41.678   |
| <a href="#">AMK58_14040</a> | <a href="#">K12542 membrane fusion protein, adhesin transport system   (GenBank) hypothetical protein</a>              | Secretion system                      | 0.874    | 1.044    | 1.329    | 41.307   | 2.357     | 8.100    |
| <a href="#">AMK58_14045</a> | <a href="#">K12541 ATP-binding cassette, subfamily C, bacterial LapB   (GenBank) hypothetical protein</a>              | Secretion system                      | 0.144    | 0.000    | 0.479    | 38.258   | 1.213     | 4.069    |
| <a href="#">AMK58_14050</a> | <a href="#">K12543 outer membrane protein, adhesin transport system   (GenBank) hypothetical protein</a>               | Membrane                              | 0.370    | 0.000    | 0.704    | 67.701   | 1.457     | 11.072   |
| <a href="#">AMK58_14055</a> | <a href="#">no KO assigned   (GenBank) hypothetical protein</a>                                                        | Hypothetical                          | 2.072    | 1.188    | 2.506    | 69.848   | 5.850     | 50.118   |
| <a href="#">AMK58_14060</a> | <a href="#">K10112 multiple sugar transport system ATP-binding protein   (GenBank) sugar ABC transporter</a>           | Transport: Sugar                      | 2.547    | 2.926    | 5.495    | 269.522  | 11.671    | 160.684  |
| <a href="#">AMK58_14065</a> | <a href="#">K02026 multiple sugar transport system permease protein   (GenBank) sugar ABC transporter</a>              | Transport: Sugar                      | 4.713    | 7.040    | 6.582    | 267.350  | 30.464    | 113.226  |

|                             |                                                                                                                      |                             |           |           |           |          |          |          |
|-----------------------------|----------------------------------------------------------------------------------------------------------------------|-----------------------------|-----------|-----------|-----------|----------|----------|----------|
| <a href="#">AMK58_14070</a> | <a href="#">K02025 multiple sugar transport system permease protein   (GenBank) sugar ABC transporter</a>            | Transport: Sugar            | 4.527     | 10.047    | 9.101     | 354.002  | 19.920   | 195.392  |
| <a href="#">AMK58_14075</a> | <a href="#">K02027 multiple sugar transport system substrate-binding protein   (GenBank) sugar ABC transporter</a>   | Transport: Sugar            | 27.926    | 35.996    | 37.282    | 1019.875 | 36.872   | 599.304  |
| <a href="#">AMK58_14080</a> | <a href="#">K13877 2,5-dioxopentanoate dehydrogenase [EC:1.2.1.26]   (GenBank) 2,5-dioxovalerate dehydrogenase</a>   | Metabolism: Carbohydrate    | 17.550    | 21.248    | 20.216    | 106.570  | 10.689   | 93.128   |
| <a href="#">AMK58_14085</a> | <a href="#">no KO assigned   (GenBank) fumarylacetoacetate hydrolase</a>                                             | hydrolase                   | 15.224    | 10.377    | 17.972    | 79.930   | 9.647    | 158.314  |
| <a href="#">AMK58_14090</a> | <a href="#">no KO assigned   (GenBank) enoyl-CoA hydratase</a>                                                       | hydratase                   | 34.896    | 32.633    | 39.960    | 309.535  | 23.023   | 214.269  |
| <a href="#">AMK58_14095</a> | <a href="#">K02027 multiple sugar transport system substrate-binding protein   (GenBank) hypothetical protein</a>    | Transport: Sugar            | 82.293    | 76.605    | 97.431    | 154.302  | 31.897   | 246.954  |
| <a href="#">AMK58_14100</a> | <a href="#">no KO assigned   (GenBank) racemase</a>                                                                  | enzyme                      | 4.366     | 8.115     | 7.103     | 251.076  | 11.014   | 75.206   |
| <a href="#">AMK58_14105</a> | <a href="#">no KO assigned   (GenBank) oxidoreductase</a>                                                            | Oxidoreductase              | 4.115     | 4.728     | 10.684    | 291.723  | 19.569   | 245.085  |
| <a href="#">AMK58_14110</a> | <a href="#">K06145 LacI family transcriptional regulator, gluconate utilization system Gnt-I transcriptional rep</a> | Transcription               | 1.938     | 1.362     | 3.469     | 145.387  | 6.279    | 67.658   |
| <a href="#">AMK58_14115</a> | <a href="#">K02014 iron complex outermembrane receptor protein   (GenBank) TonB-dependent receptor</a>               | Transport                   | 0.176     | 1.050     | 1.949     | 95.334   | 5.201    | 38.129   |
| <a href="#">AMK58_14120</a> | <a href="#">no KO assigned   (GenBank) cobalt ABC transporter substrate-binding protein</a>                          | transport                   | 4.412     | 4.881     | 8.079     | 330.500  | 35.079   | 269.084  |
| <a href="#">AMK58_14125</a> | <a href="#">no KO assigned   (GenBank) iron uptake protein</a>                                                       | Transport: Metal            | 5.300     | 4.871     | 10.465    | 612.156  | 77.898   | 373.476  |
| <a href="#">AMK58_14130</a> | <a href="#">no KO assigned   (GenBank) peptidase</a>                                                                 | peptidase                   | 14.945    | 12.237    | 13.921    | 83.938   | 13.473   | 123.665  |
| <a href="#">AMK58_14135</a> | <a href="#">no KO assigned   (GenBank) hypothetical protein</a>                                                      | Hypothetical                | 17133.343 | 13459.939 | 12499.998 | 1010.283 | 206.975  | 1478.217 |
| <a href="#">AMK58_14140</a> | <a href="#">K06200 carbon starvation protein   (GenBank) carbon starvation protein A</a>                             | Starvation                  | 663.188   | 474.188   | 545.186   | 47.000   | 8.428    | 65.070   |
| <a href="#">AMK58_14145</a> | <a href="#">no KO assigned   (GenBank) hypothetical protein</a>                                                      | Hypothetical                | 729.416   | 758.814   | 723.444   | 297.341  | 27.352   | 209.680  |
| <a href="#">AMK58_14150</a> | <a href="#">no KO assigned   (GenBank) cyclase dehydrase</a>                                                         | hydratase                   | 1683.285  | 1629.961  | 1255.345  | 375.962  | 60.659   | 423.203  |
| <a href="#">AMK58_14155</a> | <a href="#">no KO assigned   (GenBank) alcohol dehydrogenase</a>                                                     | dehydrogenase               | 68.950    | 57.350    | 52.702    | 63.326   | 6.265    | 28.713   |
| <a href="#">AMK58_14160</a> | <a href="#">no KO assigned   (GenBank) GntR family transcriptional regulator</a>                                     | Transcription               | 1328.787  | 1345.356  | 1085.650  | 457.135  | 348.864  | 647.289  |
| <a href="#">AMK58_14165</a> | <a href="#">K02030 polar amino acid transport system substrate-binding protein   (GenBank) amino acid ABC transp</a> | Transport: Amino Acid       | 75.213    | 100.466   | 63.083    | 43.618   | 91.588   | 69.035   |
| <a href="#">AMK58_14170</a> | <a href="#">K02029 polar amino acid transport system permease protein   (GenBank) polar amino acid ABC transport</a> | Transport: Amino Acid       | 35.674    | 46.286    | 32.206    | 125.260  | 170.116  | 60.144   |
| <a href="#">AMK58_14175</a> | <a href="#">K02029 polar amino acid transport system permease protein   (GenBank) amino acid ABC transporter per</a> | Transport: Amino Acid       | 6.971     | 4.384     | 8.547     | 180.616  | 1096.787 | 342.422  |
| <a href="#">AMK58_14180</a> | <a href="#">K02028 polar amino acid transport system ATP-binding protein [EC:3.6.3.21]   (GenBank) amino acid AB</a> | Transport: Amino Acid       | 0.824     | 0.984     | 4.855     | 186.017  | 17.775   | 115.477  |
| <a href="#">AMK58_14185</a> | <a href="#">no KO assigned   (GenBank) hypothetical protein</a>                                                      | Hypothetical                | 5.445     | 2.870     | 10.659    | 187.072  | 53.465   | 203.749  |
| <a href="#">AMK58_14190</a> | <a href="#">no KO assigned   (GenBank) hypothetical protein</a>                                                      | Hypothetical                | 1.118     | 3.037     | 3.093     | 166.816  | 21.597   | 105.954  |
| <a href="#">AMK58_14195</a> | <a href="#">no KO assigned   (GenBank) hypothetical protein</a>                                                      | Hypothetical                | 2.917     | 3.389     | 3.313     | 38.430   | 66.498   | 74.997   |
| <a href="#">AMK58_14200</a> | <a href="#">no KO assigned   (GenBank) hypothetical protein</a>                                                      | Hypothetical                | 13.693    | 18.658    | 15.304    | 191.148  | 123.942  | 263.522  |
| <a href="#">AMK58_14205</a> | <a href="#">K01950 NAD+ synthase (glutamine-hydrolysing) [EC:6.3.5.11]   (GenBank) nadE, NAD synthetase</a>          | Energy                      | 15.659    | 18.357    | 20.226    | 47.413   | 6.509    | 56.491   |
| <a href="#">AMK58_14210</a> | <a href="#">K03406 methyl-accepting chemotaxis protein   (GenBank) hypothetical protein</a>                          | Chemotaxis                  | 2.643     | 2.987     | 6.588     | 131.375  | 613.744  | 103.725  |
| <a href="#">AMK58_14215</a> | <a href="#">K01750 ornithine cyclodeaminase [EC:4.3.1.12]   (GenBank) hypothetical protein</a>                       | Metabolism: Amino Acid      | 3.691     | 8.086     | 9.944     | 308.219  | 734.267  | 263.560  |
| <a href="#">AMK58_14220</a> | <a href="#">K01432 arylformamidase [EC:3.5.1.9]   (GenBank) esterase</a>                                             | Metabolism                  | 1.141     | 1.704     | 3.254     | 43.937   | 53.860   | 23.406   |
| <a href="#">AMK58_14225</a> | <a href="#">K02049 NiT/TauT family transport system ATP-binding protein   (GenBank) sulfonate ABC transporter A</a>  | Transport: NiT/TauT         | 211.528   | 189.517   | 212.470   | 593.630  | 380.037  | 470.921  |
| <a href="#">AMK58_14230</a> | <a href="#">K02051 NiT/TauT family transport system substrate-binding protein   (GenBank) hypothetical protein</a>   | Transport: NiT/TauT         | 11.083    | 10.796    | 11.798    | 314.205  | 46.989   | 150.810  |
| <a href="#">AMK58_14235</a> | <a href="#">K02050 NiT/TauT family transport system permease protein   (GenBank) hypothetical protein</a>            | Transport: NiT/TauT         | 8.138     | 8.930     | 9.475     | 250.287  | 28.749   | 101.797  |
| <a href="#">AMK58_14240</a> | <a href="#">no KO assigned   (GenBank) hypothetical protein</a>                                                      | Hypothetical                | 7.799     | 10.483    | 10.937    | 241.059  | 26.517   | 110.643  |
| <a href="#">AMK58_14245</a> | <a href="#">no KO assigned   (GenBank) 3-demethylubiquinone-9 3-methyltransferase</a>                                | methyltransferase           | 18.918    | 16.577    | 22.784    | 369.987  | 44.797   | 264.769  |
| <a href="#">AMK58_14250</a> | <a href="#">K08169 MFS transporter, DHA2 family, multidrug resistance protein   (GenBank) multidrug ABC transpo</a>  | Transport: MFS              | 70.897    | 51.704    | 53.880    | 90.958   | 43.400   | 176.699  |
| <a href="#">AMK58_14255</a> | <a href="#">no KO assigned   (GenBank) LysR family transcriptional regulator</a>                                     | Transcription               | 31.967    | 31.831    | 29.761    | 114.190  | 64.977   | 338.372  |
| <a href="#">AMK58_14260</a> | <a href="#">no KO assigned   (GenBank) AraC family transcriptional regulator</a>                                     | Transcription               | 22.026    | 33.511    | 31.609    | 131.581  | 143.936  | 137.514  |
| <a href="#">AMK58_14265</a> | <a href="#">K02014 iron complex outermembrane receptor protein   (GenBank) ferrichrome-iron receptor</a>             | Transport: Metal            | 23.889    | 28.209    | 23.302    | 31.925   | 15.227   | 49.203   |
| <a href="#">AMK58_14270</a> | <a href="#">K02013 iron complex transport system ATP-binding protein [EC:3.6.3.34]   (GenBank) iron ABC transpor</a> | Transport: Metal            | 13.453    | 16.440    | 19.332    | 238.364  | 46.739   | 90.156   |
| <a href="#">AMK58_14275</a> | <a href="#">K02016 iron complex transport system substrate-binding protein   (GenBank) amino acid ABC transporte</a> | Transport: Metal            | 8.369     | 10.483    | 14.631    | 178.278  | 41.571   | 115.023  |
| <a href="#">AMK58_14280</a> | <a href="#">K02015 iron complex transport system permease protein   (GenBank) iron ABC transporter</a>               | Transport: Metal            | 52.729    | 61.469    | 49.669    | 89.830   | 12.873   | 76.891   |
| <a href="#">AMK58_14285</a> | <a href="#">K06147 ATP-binding cassette, subfamily B, bacterial   (GenBank) multidrug ABC transporter ATP-bindin</a> | Membrane Transport          | 50.033    | 55.211    | 48.258    | 184.623  | 39.521   | 287.201  |
| <a href="#">AMK58_14290</a> | <a href="#">no KO assigned   (GenBank) hypothetical protein</a>                                                      | Hypothetical                | 47.085    | 63.150    | 60.986    | 276.102  | 37.534   | 219.861  |
| <a href="#">AMK58_14295</a> | <a href="#">no KO assigned   (GenBank) hypothetical protein</a>                                                      | Hypothetical                | 30.541    | 35.842    | 44.596    | 612.215  | 57.625   | 207.345  |
| <a href="#">AMK58_14300</a> | <a href="#">no KO assigned   (GenBank) hypothetical protein</a>                                                      | Hypothetical                | 12.622    | 14.895    | 14.371    | 162.116  | 9.166    | 49.657   |
| <a href="#">AMK58_14305</a> | <a href="#">K02470 DNA gyrase subunit B [EC:5.99.1.31]   (GenBank) DNA gyrase subunit B</a>                          | DNA Repair and Replication  | 56.784    | 48.923    | 38.836    | 95.653   | 29.202   | 152.540  |
| <a href="#">AMK58_14310</a> | <a href="#">K03629 DNA replication and repair protein RecF   (GenBank) recombinase RecF</a>                          | DNA Repair and Replication  | 8.832     | 11.044    | 9.374     | 56.263   | 33.937   | 114.079  |
| <a href="#">AMK58_14315</a> | <a href="#">K02338 DNA polymerase III subunit beta [EC:2.7.7.7]   (GenBank) DNA polymerase III subunit beta</a>      | DNA Repair and Replication  | 1.606     | 1.279     | 6.616     | 10.755   | 14.680   | 66.409   |
| <a href="#">AMK58_14320</a> | <a href="#">no KO assigned   (GenBank) NAD(P)-dependent oxidoreductase</a>                                           | Energy                      | 45.712    | 59.049    | 48.815    | 563.421  | 180.840  | 386.579  |
| <a href="#">AMK58_14325</a> | <a href="#">no KO assigned   (GenBank) pseudogene</a>                                                                | Pseudogene                  | 1333.550  | 1453.279  | 1495.053  | 447.431  | 2255.334 | 571.396  |
| <a href="#">AMK58_14330</a> | <a href="#">K04758 ferrous iron transport protein A   (GenBank) hypothetical protein</a>                             | Transport: Metal            | 207.441   | 231.474   | 260.169   | 817.957  | 2786.281 | 491.741  |
| <a href="#">AMK58_14335</a> | <a href="#">K04759 ferrous iron transport protein B   (GenBank) iron transporter FeoB</a>                            | Transport: Metal            | 184.111   | 198.253   | 191.195   | 106.236  | 290.764  | 121.299  |
| <a href="#">AMK58_14340</a> | <a href="#">no KO assigned   (GenBank) hypothetical protein</a>                                                      | Hypothetical                | 144.893   | 146.252   | 164.815   | 1234.562 | 107.833  | 544.784  |
| <a href="#">AMK58_14345</a> | <a href="#">no KO assigned   (GenBank) hypothetical protein</a>                                                      | Hypothetical                | 32.080    | 35.329    | 44.487    | 114.560  | 19.442   | 38.383   |
| <a href="#">AMK58_14350</a> | <a href="#">no KO assigned   (GenBank) chloroperoxidase</a>                                                          | Defense                     | 83.358    | 89.433    | 64.467    | 27.326   | 32.497   | 40.009   |
| <a href="#">AMK58_14355</a> | <a href="#">no KO assigned   (GenBank) two-component system response regulator</a>                                   | Signal Transduction         | 279.597   | 367.474   | 297.391   | 481.359  | 141.982  | 321.156  |
| <a href="#">AMK58_14360</a> | <a href="#">no KO assigned   (GenBank) histidine kinase</a>                                                          | Signal Transduction         | 5.872     | 8.437     | 6.431     | 12.843   | 2.590    | 1.516    |
| <a href="#">AMK58_14365</a> | <a href="#">no KO assigned   (GenBank) chloroperoxidase</a>                                                          | Defense                     | 214.223   | 250.806   | 263.814   | 459.044  | 165.054  | 499.533  |
| <a href="#">AMK58_14370</a> | <a href="#">no KO assigned   (GenBank) XapX domain-containing protein</a>                                            | No COG                      | 291.387   | 320.688   | 377.974   | 574.679  | 408.733  | 477.146  |
| <a href="#">AMK58_14375</a> | <a href="#">no KO assigned   (GenBank) amidohydrolase</a>                                                            | Hydrolase                   | 12.111    | 16.996    | 63.196    | 30.726   | 44.942   |          |
| <a href="#">AMK58_14380</a> | <a href="#">no KO assigned   (GenBank) hypothetical protein</a>                                                      | Hypothetical                | 149.266   | 166.655   | 162.803   | 1036.320 | 337.898  | 420.461  |
| <a href="#">AMK58_14385</a> | <a href="#">no KO assigned   (GenBank) MFS transporter</a>                                                           | Transport: MFS              | 29.936    | 20.756    | 20.803    | 58.716   | 14.623   | 89.103   |
| <a href="#">AMK58_14390</a> | <a href="#">no KO assigned   (GenBank) hypothetical protein</a>                                                      | Hypothetical                | 0.688     | 1.028     | 0.655     | 22.478   | 1.741    | 19.390   |
| <a href="#">AMK58_14395</a> | <a href="#">no KO assigned   (GenBank) hypothetical protein</a>                                                      | Hypothetical                | 17.981    | 13.130    | 23.936    | 758.206  | 76.356   | 447.041  |
| <a href="#">AMK58_14400</a> | <a href="#">K14221 tRNA Asp   (GenBank) tRNA-Asp</a>                                                                 | tRNA synthesis/modification | 6.290     | 18.788    | 22.426    | 992.072  | 72.465   | 332.435  |

|                             |                                                                                                                         |                                     |          |          |          |          |          |          |
|-----------------------------|-------------------------------------------------------------------------------------------------------------------------|-------------------------------------|----------|----------|----------|----------|----------|----------|
| <a href="#">AMK58_14405</a> | <a href="#">K14220 tRNA Asn   (GenBank) tRNA-Asn</a>                                                                    | tRNA synthesis/modification         | 36.641   | 19.036   | 59.074   | 3555.285 | 465.582  | 1282.238 |
| <a href="#">AMK58_14410</a> | <a href="#">no KO assigned   (GenBank) hypothetical protein</a>                                                         | Hypothetical                        | 5.228    | 1.249    | 13.520   | 470.311  | 127.396  | 228.999  |
| <a href="#">AMK58_14415</a> | <a href="#">no KO assigned   (GenBank) hypothetical protein</a>                                                         | Hypothetical                        | 49.717   | 55.912   | 67.292   | 588.413  | 525.964  | 514.163  |
| <a href="#">AMK58_14420</a> | <a href="#">no KO assigned   (GenBank) hypothetical protein</a>                                                         | Hypothetical                        | 14.544   | 17.378   | 16.594   | 4.708    | 64.573   | 29.669   |
| <a href="#">AMK58_14425</a> | <a href="#">K11208 GST-like protein   (GenBank) hypothetical protein</a>                                                | No COG                              | 0.189    | 0.000    | 0.538    | 16.673   | 5.724    | 25.881   |
| <a href="#">AMK58_14430</a> | <a href="#">no KO assigned   (GenBank) LysR family transcriptional regulator</a>                                        | Transcription enzyme                | 19.262   | 31.314   | 25.416   | 140.421  | 47.279   | 51.032   |
| <a href="#">AMK58_14435</a> | <a href="#">no KO assigned   (GenBank) mandelate racemase</a>                                                           | enzyme                              | 23.268   | 28.910   | 34.947   | 26.617   | 18.400   | 27.781   |
| <a href="#">AMK58_14440</a> | <a href="#">no KO assigned   (GenBank) hypothetical protein</a>                                                         | Hypothetical                        | 51.120   | 49.460   | 55.493   | 344.333  | 192.159  | 301.497  |
| <a href="#">AMK58_14445</a> | <a href="#">no KO assigned   (GenBank) hypothetical protein</a>                                                         | Hypothetical                        | 4.178    | 4.992    | 4.568    | 51.096   | 4.743    | 34.711   |
| <a href="#">AMK58_14450</a> | <a href="#">K01866 tyrosyl-tRNA synthetase [EC:6.1.1.11]   (GenBank) tyrosine-tRNA ligase</a>                           | tRNA synthesis/modification         | 4.505    | 4.486    | 6.514    | 114.284  | 14.453   | 45.691   |
| <a href="#">AMK58_14455</a> | <a href="#">no KO assigned   (GenBank) DNA repair photolyase</a>                                                        | DNA Repair and Replication          | 18.886   | 22.164   | 17.209   | 151.645  | 57.748   | 253.519  |
| <a href="#">AMK58_14460</a> | <a href="#">no KO assigned   (GenBank) hypothetical protein</a>                                                         | Hypothetical                        | 1.832    | 2.264    | 2.282    | 24.620   | 32.657   | 42.343   |
| <a href="#">AMK58_14465</a> | <a href="#">no KO assigned   (GenBank) hypothetical protein</a>                                                         | Hypothetical                        | 168.014  | 170.909  | 170.603  | 330.039  | 364.198  | 185.808  |
| <a href="#">AMK58_14470</a> | <a href="#">no KO assigned   (GenBank) hypothetical protein</a>                                                         | Hypothetical                        | 335.179  | 240.863  | 193.206  | 83.899   | 366.087  | 71.239   |
| <a href="#">AMK58_14475</a> | <a href="#">no KO assigned   (GenBank) glycosyltransferase</a>                                                          | glycosyltransferase                 | 9.769    | 10.612   | 12.666   | 112.618  | 44.699   | 152.346  |
| <a href="#">AMK58_14480</a> | <a href="#">no KO assigned   (GenBank) hypothetical protein</a>                                                         | Hypothetical                        | 6.897    | 12.399   | 8.713    | 138.106  | 29.788   | 52.582   |
| <a href="#">AMK58_14485</a> | <a href="#">no KO assigned   (GenBank) hypothetical protein</a>                                                         | Hypothetical                        | 16.868   | 24.261   | 20.969   | 201.184  | 25.070   | 116.557  |
| <a href="#">AMK58_14490</a> | <a href="#">no KO assigned   (GenBank) hypothetical protein</a>                                                         | Hypothetical                        | 43.487   | 45.539   | 58.284   | 358.120  | 60.516   | 209.436  |
| <a href="#">AMK58_14495</a> | <a href="#">no KO assigned   (GenBank) hypothetical protein</a>                                                         | Hypothetical                        | 70.829   | 85.999   | 83.461   | 148.941  | 53.152   | 145.015  |
| <a href="#">AMK58_14500</a> | <a href="#">no KO assigned   (GenBank) hypothetical protein</a>                                                         | Hypothetical                        | 40.168   | 52.021   | 62.847   | 429.601  | 172.456  | 323.018  |
| <a href="#">AMK58_14505</a> | <a href="#">no KO assigned   (GenBank) hypothetical protein</a>                                                         | Hypothetical                        | 12.531   | 17.065   | 14.105   | 264.879  | 36.457   | 142.345  |
| <a href="#">AMK58_14510</a> | <a href="#">K20276 large repetitive protein   (GenBank) hypothetical protein</a>                                        | Quorum sensing                      | 3.982    | 5.692    | 6.125    | 40.480   | 7.976    | 25.661   |
| <a href="#">AMK58_14515</a> | <a href="#">no KO assigned   (GenBank) acyl-CoA dehydrogenase</a>                                                       | dehydrogenase                       | 26.004   | 29.208   | 32.736   | 316.290  | 48.170   | 216.245  |
| <a href="#">AMK58_14520</a> | <a href="#">K01644 citrate lyase subunit beta / citryl-CoA lyase [EC:4.1.3.34]   (GenBank) hypothetical protein</a>     | Signal transduction                 | 22.001   | 20.930   | 29.179   | 478.110  | 60.328   | 277.166  |
| <a href="#">AMK58_14525</a> | <a href="#">K09709 3-methylfumaryl-CoA hydratase [EC:4.2.1.153]   (GenBank) acyl-CoA dehydrogenase</a>                  | Metabolism                          | 52.754   | 61.141   | 68.249   | 262.587  | 87.164   | 271.318  |
| <a href="#">AMK58_14530</a> | <a href="#">no KO assigned   (GenBank) carnitine dehydratase</a>                                                        | dehydratase                         | 531.828  | 595.453  | 644.841  | 907.802  | 149.219  | 734.787  |
| <a href="#">AMK58_14535</a> | <a href="#">no KO assigned   (GenBank) hypothetical protein</a>                                                         | Hypothetical                        | 96.860   | 105.331  | 88.258   | 207.427  | 86.431   | 437.458  |
| <a href="#">AMK58_14540</a> | <a href="#">K19338 LysR family transcriptional regulator, nitrogen assimilation regulatory protein   (GenBank)  </a>    | Nitrogen                            | 11.218   | 15.407   | 11.769   | 159.178  | 11.015   | 25.706   |
| <a href="#">AMK58_14545</a> | <a href="#">K13483 xanthine dehydrogenase YaeT iron-sulfur-binding subunit   (GenBank) ferredoxin</a>                   | Metabolism: Nucleotide              | 46.908   | 35.956   | 55.372   | 309.196  | 39.395   | 164.465  |
| <a href="#">AMK58_14550</a> | <a href="#">K11178 xanthine dehydrogenase YaeS FAD-binding subunit [EC:1.1.1.4]   (GenBank) molybdopterin de</a>        | Metabolism: Nucleotide              | 10.567   | 9.128    | 12.226   | 295.380  | 37.207   | 161.852  |
| <a href="#">AMK58_14555</a> | <a href="#">K11177 xanthine dehydrogenase YaeR molybdenum-binding subunit [EC:1.1.1.4]   (GenBank) xanthine de</a>      | Metabolism: Nucleotide              | 3.699    | 5.937    | 4.619    | 13.830   | 15.887   | 50.017   |
| <a href="#">AMK58_14560</a> | <a href="#">no KO assigned   (GenBank) hypothetical protein</a>                                                         | Hypothetical                        | 20.806   | 24.711   | 25.860   | 153.120  | 113.693  | 170.032  |
| <a href="#">AMK58_14565</a> | <a href="#">K07323 phospholipid transport system substrate-binding protein   (GenBank) hypothetical protein</a>         | Transport: phospholipid             | 0.952    | 3.412    | 3.258    | 103.789  | 216.123  | 135.041  |
| <a href="#">AMK58_14570</a> | <a href="#">no KO assigned   (GenBank) sulfotransferase</a>                                                             | No COG                              | 0.553    | 0.661    | 2.418    | 103.236  | 89.983   | 68.490   |
| <a href="#">AMK58_14575</a> | <a href="#">no KO assigned   (GenBank) hypothetical protein</a>                                                         | Hypothetical                        | 5.438    | 10.260   | 13.880   | 460.102  | 311.599  | 316.903  |
| <a href="#">AMK58_14580</a> | <a href="#">K07003 uncharacterized protein   (GenBank) hypothetical protein</a>                                         | Hypothetical                        | 1.088    | 2.438    | 2.673    | 105.147  | 33.947   | 45.749   |
| <a href="#">AMK58_14585</a> | <a href="#">K06045 squalene-hopene/tetraprenyl-beta-curcumene cyclase [EC:5.4.99.17.4.2.1.129]   (GenBank) squal</a>    | Metabolism                          | 0.501    | 1.498    | 2.026    | 53.055   | 12.468   | 34.634   |
| <a href="#">AMK58_14590</a> | <a href="#">no KO assigned   (GenBank) hypothetical protein</a>                                                         | Hypothetical                        | 20.949   | 47.856   | 32.807   | 526.176  | 194.617  | 477.646  |
| <a href="#">AMK58_14595</a> | <a href="#">no KO assigned   (GenBank) hypothetical protein</a>                                                         | Hypothetical                        | 1.552    | 2.061    | 8.199    | 202.617  | 37.610   | 145.055  |
| <a href="#">AMK58_14600</a> | <a href="#">no KO assigned   (GenBank) radical SAM protein</a>                                                          | No COG                              | 21.252   | 19.238   | 32.352   | 360.892  | 116.548  | 279.977  |
| <a href="#">AMK58_14605</a> | <a href="#">K06952 uncharacterized protein   (GenBank) hydrolase</a>                                                    | hydrolase                           | 26.455   | 18.459   | 51.042   | 676.421  | 119.597  | 346.836  |
| <a href="#">AMK58_14610</a> | <a href="#">K03413 two-component system, chemotaxis family, response regulator CheY   (GenBank) regulator</a>           | Chemotaxis                          | 4.175    | 3.326    | 12.173   | 165.541  | 64.136   | 108.914  |
| <a href="#">AMK58_14615</a> | <a href="#">no KO assigned   (GenBank) hypothetical protein</a>                                                         | Hypothetical                        | 1.527    | 1.303    | 3.319    | 87.960   | 22.437   | 32.366   |
| <a href="#">AMK58_14620</a> | <a href="#">no KO assigned   (GenBank) hypothetical protein</a>                                                         | Hypothetical                        | 12.990   | 7.702    | 22.156   | 107.593  | 37.897   | 183.438  |
| <a href="#">AMK58_14625</a> | <a href="#">no KO assigned   (GenBank) exopolysaccharide biosynthesis protein</a>                                       | Biosynthesis: polysaccharide        | 40.533   | 42.796   | 42.028   | 120.060  | 88.961   | 259.046  |
| <a href="#">AMK58_14630</a> | <a href="#">K03699 putative hemolysin   (GenBank) hypothetical protein</a>                                              | Defense                             | 31.513   | 33.030   | 34.781   | 25.303   | 21.232   | 87.235   |
| <a href="#">AMK58_14635</a> | <a href="#">no KO assigned   (GenBank) hypothetical protein</a>                                                         | Hypothetical                        | 48.815   | 56.922   | 58.425   | 163.190  | 222.851  | 124.380  |
| <a href="#">AMK58_14640</a> | <a href="#">no KO assigned   (GenBank) hypothetical protein</a>                                                         | Hypothetical                        | 19.951   | 23.839   | 27.316   | 298.257  | 183.636  | 130.347  |
| <a href="#">AMK58_14645</a> | <a href="#">no KO assigned   (GenBank) hypothetical protein</a>                                                         | Hypothetical                        | 102.184  | 121.414  | 140.157  | 287.564  | 121.937  | 223.743  |
| <a href="#">AMK58_14650</a> | <a href="#">no KO assigned   (GenBank) hypothetical protein</a>                                                         | Hypothetical                        | 1227.347 | 1260.039 | 1316.441 | 469.118  | 399.134  | 738.807  |
| <a href="#">AMK58_14655</a> | <a href="#">no KO assigned   (GenBank) hypothetical protein</a>                                                         | Hypothetical                        | 16.078   | 18.427   | 16.971   | 58.106   | 64.174   | 151.701  |
| <a href="#">AMK58_14660</a> | <a href="#">K05837 rod shape determining protein RodA   (GenBank) rod shape-determining protein RodA</a>                | Cell Cycle/Shape/Homeostasis        | 13.109   | 14.183   | 11.875   | 99.828   | 50.005   | 234.589  |
| <a href="#">AMK58_14665</a> | <a href="#">no KO assigned   (GenBank) hypothetical protein</a>                                                         | Hypothetical                        | 10.234   | 9.229    | 12.485   | 77.342   | 26.698   | 187.832  |
| <a href="#">AMK58_14670</a> | <a href="#">no KO assigned   (GenBank) hypothetical protein</a>                                                         | Hypothetical                        | 6.974    | 8.334    | 6.897    | 14.450   | 10.191   | 47.900   |
| <a href="#">AMK58_14675</a> | <a href="#">K07216 hemerythrin   (GenBank) hypothetical protein</a>                                                     | hemerythrin                         | 45.835   | 41.335   | 50.707   | 630.980  | 295.517  | 815.024  |
| <a href="#">AMK58_14680</a> | <a href="#">K01586 diaminopimelate decarboxylase [EC:4.1.1.20]   (GenBank) diaminopimelate decarboxylase</a>            | Biosynthesis: Amino Acid            | 77.465   | 55.994   | 72.927   | 116.067  | 90.084   | 199.975  |
| <a href="#">AMK58_14685</a> | <a href="#">no KO assigned   (GenBank) hypothetical protein</a>                                                         | Hypothetical                        | 97.641   | 120.559  | 147.922  | 325.244  | 413.401  | 1185.471 |
| <a href="#">AMK58_14690</a> | <a href="#">K01755 argininosuccinate lyase [EC:4.3.2.1]   (GenBank) argininosuccinate lyase</a>                         | Metabolism: Amino Acid              | 134.528  | 150.130  | 155.584  | 321.538  | 369.477  | 167.345  |
| <a href="#">AMK58_14695</a> | <a href="#">no KO assigned   (GenBank) thiol-disulfide interchange protein</a>                                          | Cell Cycle/Shape/Homeostasis        | 207.583  | 179.723  | 185.647  | 132.402  | 43.054   | 131.674  |
| <a href="#">AMK58_14700</a> | <a href="#">K08995 putative membrane protein   (GenBank) hypothetical protein</a>                                       | Membrane                            | 327.125  | 316.241  | 318.168  | 301.280  | 70.668   | 293.932  |
| <a href="#">AMK58_14705</a> | <a href="#">K00074 3-hydroxybutyryl-CoA dehydrogenase [EC:1.1.1.157]   (GenBank) 3-hydroxybutyryl-CoA dehyd</a>         | Metabolism                          | 13.223   | 6.583    | 10.477   | 14.761   | 3.871    | 11.623   |
| <a href="#">AMK58_14710</a> | <a href="#">K03522 electron transfer flavoprotein alpha subunit   (GenBank) electron transfer flavoprotein subun</a>    | Energy                              | 307.651  | 295.813  | 296.195  | 235.593  | 231.315  | 222.148  |
| <a href="#">AMK58_14715</a> | <a href="#">K03521 electron transfer flavoprotein beta subunit   (GenBank) electron transfer flavoprotein subuni</a>    | Energy                              | 90.213   | 85.101   | 98.114   | 247.413  | 364.516  | 159.085  |
| <a href="#">AMK58_14720</a> | <a href="#">K00798 cob(II)laminal adenosyltransferase [EC:2.5.1.17]   (GenBank) cob(II)yrinic acid a c-diamide aden</a> | Metabolism: Co-Factors and Vitamins | 21.241   | 43.148   | 34.536   | 254.945  | 169.520  | 142.405  |
| <a href="#">AMK58_14725</a> | <a href="#">no KO assigned   (GenBank) hypothetical protein</a>                                                         | Hypothetical                        | 6888.845 | 5746.040 | 5921.836 | 235.377  | 3132.935 | 645.982  |
| <a href="#">AMK58_14730</a> | <a href="#">K05350 beta-glucosidase [EC:3.2.1.21]   (GenBank) beta-glucosidase</a>                                      | Metabolism: Carbohydrates           | 263.290  | 236.126  | 206.165  | 133.084  | 124.447  | 47.341   |
| <a href="#">AMK58_14735</a> | <a href="#">no KO assigned   (GenBank) hypothetical protein</a>                                                         | Hypothetical                        | 309.413  | 319.884  | 352.776  | 142.363  | 176.619  | 83.579   |

|             |                                                                                                                                                                                   |                                     |          |          |          |          |          |          |
|-------------|-----------------------------------------------------------------------------------------------------------------------------------------------------------------------------------|-------------------------------------|----------|----------|----------|----------|----------|----------|
| AMK58_14740 | no KO assigned   (GenBank) hypothetical protein                                                                                                                                   | Hypothetical                        | 128.033  | 138.574  | 127.028  | 597.167  | 398.372  | 311.860  |
| AMK58_14745 | no KO assigned   (GenBank) hypothetical protein                                                                                                                                   | Hypothetical                        | 27.529   | 27.146   | 30.114   | 16.111   | 100.643  | 33.210   |
| AMK58_14750 | no KO assigned   (GenBank) hypothetical protein                                                                                                                                   | Hypothetical                        | 596.405  | 532.842  | 539.590  | 1230.744 | 2222.295 | 1025.212 |
| AMK58_14755 | no KO assigned   (GenBank) hypothetical protein                                                                                                                                   | Hypothetical                        | 46.731   | 42.830   | 40.898   | 229.408  | 145.345  | 103.899  |
| AMK58_14760 | K10773 endonuclease III [EC:4.2.99.18]   (GenBank) DNA lyase                                                                                                                      | DNA Repair and Replication          | 22.712   | 25.051   | 19.270   | 21.531   | 31.618   | 57.512   |
| AMK58_14765 | no KO assigned   (GenBank) carboxymuconolactone decarboxylase                                                                                                                     | No COG                              | 174.558  | 227.396  | 164.099  | 493.590  | 397.215  | 192.288  |
| AMK58_14770 | no KO assigned   (GenBank) hypothetical protein                                                                                                                                   | Hypothetical                        | 8.347    | 8.226    | 6.955    | 47.146   | 25.826   | 23.938   |
| AMK58_14775 | K01999 branched-chain amino acid transport system substrate-binding protein   (GenBank) branched-chain amino acid transport system permease protein   (GenBank) ABC transporter A | Transport: Amino Acid               | 10.636   | 7.375    | 14.537   | 82.047   | 51.128   | 100.030  |
| AMK58_14780 | no KO assigned   (GenBank) hypothetical protein                                                                                                                                   | Hypothetical                        | 2.346    | 2.804    | 4.717    | 87.110   | 38.959   | 93.372   |
| AMK58_14785 | K16291 L,D-transpeptidase Erk/SrK   (GenBank) hypothetical protein                                                                                                                | Cell Wall                           | 238.256  | 406.258  | 475.035  | 76.313   | 18.963   | 97.228   |
| AMK58_14790 | K01997 branched-chain amino acid transport system permease protein   (GenBank) branched-chain amino acid transport system permease protein   (GenBank) ABC transporter A          | Transport: Amino Acid               | 122.327  | 193.726  | 225.342  | 353.640  | 54.750   | 208.796  |
| AMK58_14795 | K01998 branched-chain amino acid transport system permease protein   (GenBank) branched-chain amino acid transport system permease protein   (GenBank) ABC transporter A          | Transport: Amino Acid               | 250.588  | 208.239  | 197.563  | 150.227  | 55.674   | 201.859  |
| AMK58_14800 | K01995 branched-chain amino acid transport system ATP-binding protein   (GenBank) ABC transporter A                                                                               | Transport: Amino Acid               | 318.363  | 281.969  | 300.800  | 492.589  | 117.535  | 392.635  |
| AMK58_14805 | K03406 methyl-accepting chemotaxis protein   (GenBank) hypothetical protein                                                                                                       | Chemotaxis                          | 2.050    | 4.223    | 2.487    | 86.442   | 11.599   | 53.218   |
| AMK58_14810 | K07091 lipopolysaccharide export system permease protein   (GenBank) LPS export ABC transporter per                                                                               | Transport: polysaccharide           | 33.668   | 32.880   | 35.911   | 118.821  | 14.313   | 126.178  |
| AMK58_14815 | no KO assigned   (GenBank) pseudogene                                                                                                                                             | Pseudogene                          | 37.183   | 26.879   | 35.983   | 167.326  | 12.345   | 147.362  |
| AMK58_14820 | K06602 flagellar protein FlaF   (GenBank) hypothetical protein                                                                                                                    | Motility                            | 44.072   | 36.981   | 42.610   | 174.458  | 33.675   | 206.861  |
| AMK58_14825 | no KO assigned   (GenBank) hypothetical protein                                                                                                                                   | Hypothetical                        | 314.373  | 415.746  | 390.747  | 154.889  | 42.533   | 141.057  |
| AMK58_14830 | K02396 flagellar hook-associated protein 1 FlaK   (GenBank) flagellar hook protein                                                                                                | Motility                            | 132.003  | 118.760  | 124.364  | 133.368  | 44.687   | 145.384  |
| AMK58_14835 | K02390 flagellar hook protein FlaE   (GenBank) hypothetical protein                                                                                                               | Motility                            | 6.282    | 4.613    | 6.340    | 29.240   | 4.063    | 29.418   |
| AMK58_14840 | no KO assigned   (GenBank) hypothetical protein                                                                                                                                   | Hypothetical                        | 1987.950 | 2743.636 | 2620.409 | 472.633  | 2097.760 | 604.442  |
| AMK58_14845 | no KO assigned   (GenBank) hypothetical protein                                                                                                                                   | Hypothetical                        | 271.024  | 311.714  | 278.263  | 158.173  | 52.286   | 291.361  |
| AMK58_14850 | no KO assigned   (GenBank) hypothetical protein                                                                                                                                   | Hypothetical                        | 526.112  | 662.533  | 562.458  | 633.645  | 185.953  | 898.157  |
| AMK58_14855 | no KO assigned   (GenBank) histidine kinase                                                                                                                                       | Signal Transduction                 | 470.879  | 560.366  | 502.015  | 202.207  | 57.917   | 343.894  |
| AMK58_14860 | no KO assigned   (GenBank) bifunctional metallophosphatase/5'-nucleotidase                                                                                                        | Metabolism: Nucleotide              | 9.234    | 15.219   | 11.429   | 40.520   | 3.579    | 32.404   |
| AMK58_14865 | K00375 GntR family transcriptional regulator / MocR family aminotransferase   (GenBank) GntR family                                                                               | Transcription                       | 16.613   | 34.589   | 24.492   | 132.514  | 41.120   | 64.187   |
| AMK58_14870 | no KO assigned   (GenBank) alkyldroperoxidase                                                                                                                                     | Defense                             | 39.551   | 46.616   | 43.489   | 132.632  | 63.813   | 154.184  |
| AMK58_14875 | K19335 TetR/AcrR family transcriptional regulator, repressor for divergent bdcA   (GenBank) TetR fam                                                                              | Transcription                       | 130.155  | 127.793  | 129.125  | 769.302  | 296.910  | 696.633  |
| AMK58_14880 | K19336 cyclic-di-GMP-binding biofilm dispersal mediator protein   (GenBank) oxidoreductase                                                                                        | cyclic nucleotide                   | 101.913  | 111.441  | 116.570  | 366.622  | 174.977  | 204.255  |
| AMK58_14885 | K04719 5,6-dimethylbenzimidazole synthase [EC:1.13.11.79]   (GenBank) 5,6-dimethylbenzimidazole svnt                                                                              | Metabolism: Co-Factors and Vitamins | 21.830   | 26.304   | 31.745   | 496.879  | 51.757   | 188.137  |
| AMK58_14890 | K02224 cobvriinic acid a.e-diamide synthase [EC:6.3.5.9.6.3.5.11]   (GenBank) cobvriinic acid a.e-diam                                                                            | Metabolism: Co-Factors and Vitamins | 10.635   | 9.775    | 11.062   | 52.844   | 15.121   | 58.242   |
| AMK58_14895 | K02303 uroporphyrin-III C-methyltransferase [EC:2.1.1.107]   (GenBank) uroporphyrin-III methyltransf                                                                              | Metabolism: Co-Factors and Vitamins | 7.051    | 7.171    | 9.986    | 153.142  | 20.574   | 119.782  |
| AMK58_14900 | K02188 cobalt-precocorrin-5B (C1)-methyltransferase [EC:2.1.1.195]   (GenBank) cobalt-precocorrin-6A svn                                                                          | Metabolism: Co-Factors and Vitamins | 4.856    | 6.447    | 6.874    | 103.787  | 9.582    | 83.252   |
| AMK58_14905 | K05936 precocorrin-4/cobalt-precocorrin-4 C11-methyltransferase [EC:2.1.1.133.2.1.1.271]   (GenBank) pre                                                                          | Metabolism: Co-Factors and Vitamins | 19.067   | 17.087   | 17.676   | 103.867  | 19.289   | 132.160  |
| AMK58_14910 | K02189 cobalt-precocorrin 5A hydrolase [EC:3.7.1.12]   (GenBank) cobalamin biosynthesis protein                                                                                   | Metabolism: Co-Factors and Vitamins | 42.600   | 43.535   | 57.293   | 642.361  | 42.529   | 238.833  |
| AMK58_14915 | K00595 precocorrin-6Y C5.15-methyltransferase (decarboxylating) [EC:2.1.1.132]   (GenBank) precoc                                                                                 | Metabolism: Co-Factors and Vitamins | 16.281   | 16.507   | 19.327   | 121.474  | 14.641   | 51.514   |
| AMK58_14920 | K05895 precocorrin-6A/cobalt-precocorrin-6A reductase [EC:1.3.1.54   1.3.1.106]   (GenBank) cobalt-precoc                                                                         | Metabolism: Co-Factors and Vitamins | 26.192   | 18.699   | 27.723   | 249.568  | 21.849   | 86.761   |
| AMK58_14925 | K05934 precocorrin-3B C17-methyltransferase [EC:2.1.1.131]   (GenBank) precocorrin-3B C17-methyltransfer                                                                          | methyltransferase                   | 11.554   | 10.401   | 14.747   | 248.473  | 10.140   | 84.679   |
| AMK58_14930 | K03394 precocorrin-2/cobalt-factor-2 C20-methyltransferase [EC:2.1.1.130.2.1.1.151]   (GenBank) precoc                                                                            | Metabolism: Co-Factors and Vitamins | 1.286    | 0.961    | 1.529    | 45.662   | 1.807    | 5.218    |
| AMK58_14935 | K06042 precocorrin-8X/cobalt-precocorrin-8 methylmutase [EC:5.4.99.61   5.4.99.60]   (GenBank) cobH; prec                                                                         | Metabolism: Co-Factors and Vitamins | 15.087   | 19.154   | 18.290   | 336.750  | 19.926   | 135.178  |
| AMK58_14940 | K02229 precocorrin-3B synthase [EC:1.14.13.83]   (GenBank) precocorrin-3B svnthase                                                                                                | Metabolism: Co-Factors and Vitamins | 18.534   | 24.836   | 18.692   | 67.287   | 13.921   | 42.964   |
| AMK58_14945 | K02230 cobaltochelataze CobN [EC:6.6.1.2]   (GenBank) cobalt chelatase                                                                                                            | Metabolism: Co-Factors and Vitamins | 3.621    | 3.817    | 3.375    | 31.096   | 3.032    | 16.029   |
| AMK58_14950 | K02234 cobalamin biosynthesis protein CobW   (GenBank) cobalamin biosynthesis protein CobW                                                                                        | Metabolism: Co-Factors and Vitamins | 18.263   | 16.164   | 17.579   | 139.081  | 14.446   | 90.004   |
| AMK58_14955 | K01995 branched-chain amino acid transport system ATP-binding protein   (GenBank) ABC transporter A                                                                               | Transport: Amino Acid               | 34.502   | 35.931   | 38.975   | 148.829  | 23.305   | 53.567   |
| AMK58_14960 | K01996 branched-chain amino acid transport system ATP-binding protein   (GenBank) ABC transporter A                                                                               | Transport: Amino Acid               | 36.172   | 40.020   | 45.697   | 622.498  | 32.376   | 278.267  |
| AMK58_14965 | K01999 branched-chain amino acid transport system substrate-binding protein   (GenBank) ABC transporter                                                                           | Transport: Amino Acid               | 17.311   | 17.437   | 20.670   | 488.310  | 51.700   | 201.395  |
| AMK58_14970 | K01997 branched-chain amino acid transport system permease protein   (GenBank) ABC transporter perme                                                                              | Transport: Amino Acid               | 55.902   | 57.021   | 52.633   | 229.946  | 129.043  | 190.277  |
| AMK58_14975 | K01998 branched-chain amino acid transport system permease protein   (GenBank) ABC transporter perme                                                                              | Transport: Amino Acid               | 77.404   | 92.343   | 90.626   | 104.345  | 55.982   | 140.366  |
| AMK58_14980 | K01907 acetoacetyl-CoA synthetase [EC:6.2.1.16]   (GenBank) acetoacetyl-CoA synthetase                                                                                            | Metabolism                          | 50.754   | 43.474   | 48.315   | 55.946   | 32.236   | 71.104   |
| AMK58_14985 | K00019 3-hydroxybutyrate dehydrogenase [EC:1.1.1.30]   (GenBank) 3-hydroxybutyrate dehydrogenase                                                                                  | Lipid metabolism                    | 756.178  | 643.289  | 812.863  | 210.883  | 245.176  | 365.805  |
| AMK58_14990 | K11209 GSH-dependent disulfide-bond oxidoreductase [EC:1.8.4.-1]   (GenBank) glutathione S-transferas                                                                             | transferase                         | 264.398  | 187.537  | 271.563  | 131.689  | 109.534  | 284.832  |
| AMK58_14995 | no KO assigned   (GenBank) hypothetical protein                                                                                                                                   | Hypothetical                        | 653.299  | 467.167  | 658.336  | 514.433  | 369.295  | 1017.444 |
| AMK58_15000 | no KO assigned   (GenBank) hypothetical protein                                                                                                                                   | Hypothetical                        | 1326.847 | 1205.593 | 1428.211 | 2037.321 | 910.395  | 1771.708 |
| AMK58_15005 | no KO assigned   (GenBank) regulator                                                                                                                                              | signal transduction                 | 144.596  | 166.204  | 166.204  | 263.345  | 295.008  | 275.279  |
| AMK58_15010 | K06995 uncharacterized protein   (GenBank) hypothetical protein                                                                                                                   | Hypothetical                        | 596.708  | 609.453  | 472.011  | 133.331  | 842.164  | 329.921  |
| AMK58_15015 | K06044 (1->4)-alpha-D-glucan 1-alpha-D-glucosylmutase [EC:5.4.99.15]   (GenBank) malto-oligosyltretra                                                                             | Metabolism: Carbohydrate            | 0.787    | 0.522    | 0.790    | 9.723    | 108.029  | 21.367   |
| AMK58_15020 | no KO assigned   (GenBank) 4-alpha-glucanotransferase                                                                                                                             | transferase                         | 0.344    | 0.385    | 0.327    | 4.949    | 34.766   | 7.708    |
| AMK58_15025 | no KO assigned   (GenBank) hypothetical protein                                                                                                                                   | Hypothetical                        | 81.101   | 128.597  | 110.368  | 448.457  | 2539.542 | 352.491  |
| AMK58_15030 | K14218 tRNA Ala   (GenBank) tRNA-Ala                                                                                                                                              | tRNA synthesis/modification         | 60.537   | 76.143   | 151.472  | 1700.818 | 2114.817 | 1463.937 |
| AMK58_15035 | K14228 tRNA Leu   (GenBank) tRNA-Leu                                                                                                                                              | tRNA synthesis/modification         | 175.350  | 99.773   | 348.003  | 5861.062 | 2931.479 | 5373.459 |
| AMK58_15040 | no KO assigned   (GenBank) hypothetical protein                                                                                                                                   | Hypothetical                        | 12.175   | 15.464   | 22.878   | 850.224  | 496.207  | 528.725  |
| AMK58_15045 | no KO assigned   (GenBank) hypothetical protein                                                                                                                                   | Hypothetical                        | 4.763    | 2.995    | 6.197    | 105.102  | 96.364   | 80.658   |
| AMK58_15050 | no KO assigned   (GenBank) hypothetical protein                                                                                                                                   | Hypothetical                        | 11.227   | 10.878   | 7.213    | 63.411   | 1.705    | 235.232  |
| AMK58_15055 | no KO assigned   (GenBank) hypothetical protein                                                                                                                                   | Hypothetical                        | 1.058    | 1.355    | 0.503    | 6.277    | 1.359    | 19.062   |
| AMK58_15060 | K01286 D-alanyl-D-alanine carboxypeptidase [EC:3.4.16.4]   (GenBank) hypothetical protein                                                                                         | Hydrolases                          | 3.096    | 1.914    | 8.426    | 160.470  | 51.245   | 185.235  |
| AMK58_15065 | K07401 selenoprotein W-related protein   (GenBank) hypothetical protein                                                                                                           | Hypothetical                        | 43.311   | 94.095   | 54.752   | 45.491   | 94.048   | 182.096  |
| AMK58_15070 | no KO assigned   (GenBank) hypothetical protein                                                                                                                                   | Hypothetical                        | 31.355   | 33.386   | 45.162   | 306.906  | 115.156  | 243.827  |



|                             |                                                                                                                        |                                |          |          |          |          |         |          |
|-----------------------------|------------------------------------------------------------------------------------------------------------------------|--------------------------------|----------|----------|----------|----------|---------|----------|
| <a href="#">AMK58_15075</a> | <a href="#">K02012 iron(III) transport system substrate-binding protein   (GenBank) ABC transporter substrate-bi</a>   | Transport: Metal               | 29.298   | 29.525   | 30.766   | 129.560  | 97.077  | 140.964  |
| <a href="#">AMK58_15080</a> | <a href="#">K02011 iron(III) transport system permease protein   (GenBank) ABC transporter permease</a>                | Transport: Metal               | 94.441   | 80.225   | 86.198   | 155.130  | 145.933 | 113.026  |
| <a href="#">AMK58_15085</a> | <a href="#">K02010 iron(III) transport system ATP-binding protein [EC:3.6.3.30]   (GenBank) spermidine/putrescin</a>   | Transport: Metal               | 54.367   | 48.489   | 55.710   | 158.463  | 25.869  | 147.528  |
| <a href="#">AMK58_15090</a> | <a href="#">no KO assigned   (GenBank) hypothetical protein</a>                                                        | Hypothetical                   | 12.302   | 16.762   | 9.645    | 40.330   | 11.644  | 42.126   |
| <a href="#">AMK58_15095</a> | <a href="#">K03316 monovalent cation:H<sup>+</sup> antiporter, CPA1 family   (GenBank) sodium:proton antiporter</a>    | Transport: Ion                 | 1.455    | 5.217    | 3.690    | 36.258   | 7.852   | 31.036   |
| <a href="#">AMK58_15100</a> | <a href="#">K07112 uncharacterized protein   (GenBank) hypothetical protein</a>                                        | Hypothetical                   | 54.352   | 47.860   | 49.750   | 109.618  | 62.120  | 158.438  |
| <a href="#">AMK58_15105</a> | <a href="#">no KO assigned   (GenBank) LysR family transcriptional regulator</a>                                       | Transcription                  | 9.654    | 9.613    | 14.533   | 264.024  | 16.428  | 127.065  |
| <a href="#">AMK58_15110</a> | <a href="#">K00121 S-(hydroxymethyl)glutathione dehydrogenase / alcohol dehydrogenase [EC:1.1.1.284   1.1.1.1]   (</a> | Metabolism                     | 7.790    | 7.757    | 12.139   | 148.417  | 12.405  | 40.834   |
| <a href="#">AMK58_15115</a> | <a href="#">K01070 S-formylglutathione hydrolase [EC:3.1.2.12]   (GenBank) S-formylglutathione hydrolase</a>           | Metabolism                     | 20.740   | 19.256   | 25.982   | 253.040  | 12.444  | 89.140   |
| <a href="#">AMK58_15120</a> | <a href="#">K07080 uncharacterized protein   (GenBank) immunogenic protein</a>                                         | No COG                         | 5.520    | 7.329    | 10.847   | 292.822  | 27.026  | 113.293  |
| <a href="#">AMK58_15125</a> | <a href="#">no KO assigned   (GenBank) C4-dicarboxylate ABC transporter permease</a>                                   | Membrane Transport             | 13.589   | 3.136    | 6.044    | 140.155  | 24.518  | 92.855   |
| <a href="#">AMK58_15130</a> | <a href="#">no KO assigned   (GenBank) EBNA-1 nuclear protein</a>                                                      | No COG                         | 14.328   | 10.701   | 12.034   | 181.220  | 43.351  | 148.475  |
| <a href="#">AMK58_15135</a> | <a href="#">no KO assigned   (GenBank) NUDIX hydrolase</a>                                                             | hydrolase                      | 1076.599 | 898.251  | 1059.581 | 529.599  | 181.458 | 503.632  |
| <a href="#">AMK58_15140</a> | <a href="#">K00041 taguronate reductase [EC:1.1.1.58]   (GenBank) altronate oxidoreductase</a>                         | Oxidoreductase                 | 168.201  | 132.147  | 159.220  | 88.887   | 36.180  | 72.704   |
| <a href="#">AMK58_15145</a> | <a href="#">K01685 altronate hydrolase [EC:4.2.1.7]   (GenBank) altronate hydrolase</a>                                | Metabolism: Carbohydrates      | 2767.714 | 2300.348 | 2492.000 | 114.446  | 192.158 | 146.599  |
| <a href="#">AMK58_15150</a> | <a href="#">no KO assigned   (GenBank) C4-dicarboxylate ABC transporter</a>                                            | Membrane Transport             | 457.425  | 388.626  | 416.685  | 261.533  | 89.768  | 359.703  |
| <a href="#">AMK58_15155</a> | <a href="#">no KO assigned   (GenBank) C4-dicarboxylate ABC transporter permease</a>                                   | Membrane Transport             | 412.837  | 344.016  | 388.862  | 409.080  | 63.568  | 416.184  |
| <a href="#">AMK58_15160</a> | <a href="#">no KO assigned   (GenBank) C4-dicarboxylate ABC transporter</a>                                            | Membrane Transport             | 355.774  | 419.917  | 461.893  | 69.366   | 284.888 | 147.851  |
| <a href="#">AMK58_15165</a> | <a href="#">no KO assigned   (GenBank) sorbitol dehydrogenase</a>                                                      | dehydrogenase                  | 31.564   | 33.829   | 37.113   | 258.852  | 94.114  | 294.694  |
| <a href="#">AMK58_15170</a> | <a href="#">no KO assigned   (GenBank) hypothetical protein</a>                                                        | Hypothetical                   | 36.165   | 32.358   | 33.556   | 406.284  | 67.556  | 324.335  |
| <a href="#">AMK58_15175</a> | <a href="#">no KO assigned   (GenBank) RND transporter</a>                                                             | Transport                      | 12.846   | 8.429    | 9.743    | 45.806   | 8.973   | 102.320  |
| <a href="#">AMK58_15180</a> | <a href="#">no KO assigned   (GenBank) hemolysin secretion protein D</a>                                               | Secretion system               | 19.016   | 18.734   | 14.330   | 33.602   | 15.235  | 81.506   |
| <a href="#">AMK58_15185</a> | <a href="#">no KO assigned   (GenBank) hypothetical protein</a>                                                        | Hypothetical                   | 319.744  | 227.797  | 268.823  | 112.903  | 110.779 | 309.103  |
| <a href="#">AMK58_15190</a> | <a href="#">no KO assigned   (GenBank) hypothetical protein</a>                                                        | Hypothetical                   | 25.411   | 24.112   | 23.877   | 211.643  | 51.413  | 239.786  |
| <a href="#">AMK58_15195</a> | <a href="#">no KO assigned   (GenBank) phosphoglycerate mutase</a>                                                     | No COG                         | 21.620   | 18.453   | 18.795   | 67.302   | 105.773 | 191.317  |
| <a href="#">AMK58_15200</a> | <a href="#">no KO assigned   (GenBank) hypothetical protein</a>                                                        | Hypothetical                   | 97.623   | 110.784  | 213.126  | 2510.228 | 512.495 | 2846.188 |
| <a href="#">AMK58_15205</a> | <a href="#">K05879 dihydroxyacetone kinase, C-terminal domain [EC:2.7.1.-]   (GenBank) Dak phosphatase</a>             | Metabolism: Lipid              | 2.008    | 22.348   | 45.860   | 549.586  | 110.202 | 310.339  |
| <a href="#">AMK58_15210</a> | <a href="#">K05878 dihydroxyacetone kinase, N-terminal domain [EC:2.7.1.-]   (GenBank) dihydroxyacetone kinase</a>     | Lipid metabolism               | 2.303    | 5.793    | 6.223    | 76.628   | 9.127   | 123.733  |
| <a href="#">AMK58_15215</a> | <a href="#">no KO assigned   (GenBank) transcriptional regulator</a>                                                   | Transcription                  | 6.151    | 8.964    | 10.128   | 157.563  | 21.923  | 253.476  |
| <a href="#">AMK58_15220</a> | <a href="#">K01714 4-hydroxy-tetrahydrodipicolinate synthase [EC:4.3.3.7]   (GenBank) dihydrodipicolinate synthase</a> | Metabolism: Amino Acid         | 96.595   | 106.725  | 93.605   | 59.911   | 121.517 | 183.681  |
| <a href="#">AMK58_15225</a> | <a href="#">no KO assigned   (GenBank) hypothetical protein</a>                                                        | Hypothetical                   | 36.478   | 38.641   | 64.078   | 22.006   | 37.222  | 85.162   |
| <a href="#">AMK58_15230</a> | <a href="#">no KO assigned   (GenBank) hypothetical protein</a>                                                        | Hypothetical                   | 14.584   | 12.770   | 14.225   | 76.293   | 64.302  | 152.957  |
| <a href="#">AMK58_15235</a> | <a href="#">no KO assigned   (GenBank) hypothetical protein</a>                                                        | Hypothetical                   | 37.618   | 35.721   | 45.479   | 342.726  | 154.015 | 330.803  |
| <a href="#">AMK58_15240</a> | <a href="#">no KO assigned   (GenBank) C4-dicarboxylate ABC transporter permease</a>                                   | Membrane Transport             | 59.853   | 65.453   | 58.134   | 54.386   | 101.776 | 122.279  |
| <a href="#">AMK58_15245</a> | <a href="#">K13877 2,5-dioxopentanoate dehydrogenase [EC:1.2.1.26]   (GenBank) 2,5-dioxovalerate dehydrogenase</a>     | Metabolism: Carbohydrate       | 9.069    | 5.418    | 9.054    | 98.709   | 31.008  | 114.933  |
| <a href="#">AMK58_15250</a> | <a href="#">no KO assigned   (GenBank) pseudogene</a>                                                                  | Pseudogene                     | 27.229   | 30.008   | 34.686   | 376.781  | 67.155  | 478.494  |
| <a href="#">AMK58_15255</a> | <a href="#">no KO assigned   (GenBank) transposase</a>                                                                 | Genetic Information Processing | 62.985   | 66.941   | 62.679   | 179.381  | 41.207  | 164.117  |
| <a href="#">AMK58_15260</a> | <a href="#">no KO assigned   (GenBank) hypothetical protein</a>                                                        | Hypothetical                   | 45.739   | 37.890   | 43.489   | 90.361   | 20.306  | 145.416  |
| <a href="#">AMK58_15265</a> | <a href="#">no KO assigned   (GenBank) hypothetical protein</a>                                                        | Hypothetical                   | 296.888  | 216.175  | 281.402  | 871.205  | 260.715 | 1352.398 |
| <a href="#">AMK58_15270</a> | <a href="#">no KO assigned   (GenBank) hypothetical protein</a>                                                        | Hypothetical                   | 71.671   | 87.302   | 91.632   | 1002.476 | 139.222 | 741.690  |
| <a href="#">AMK58_15275</a> | <a href="#">no KO assigned   (GenBank) hypothetical protein</a>                                                        | Hypothetical                   | 18.627   | 28.664   | 17.711   | 239.309  | 46.951  | 255.158  |
| <a href="#">AMK58_15280</a> | <a href="#">K09780 uncharacterized protein   (GenBank) hypothetical protein</a>                                        | Hypothetical                   | 18.944   | 19.683   | 31.716   | 412.636  | 230.988 | 902.358  |
| <a href="#">AMK58_15285</a> | <a href="#">no KO assigned   (GenBank) hypothetical protein</a>                                                        | Hypothetical                   | 24.593   | 18.837   | 24.583   | 312.546  | 200.596 | 957.216  |
| <a href="#">AMK58_15290</a> | <a href="#">no KO assigned   (GenBank) hypothetical protein</a>                                                        | Hypothetical                   | 17.575   | 19.445   | 22.281   | 173.521  | 66.583  | 436.403  |
| <a href="#">AMK58_15295</a> | <a href="#">no KO assigned   (GenBank) hypothetical protein</a>                                                        | Hypothetical                   | 0.545    | 5.431    | 2.247    | 46.269   | 11.239  | 147.164  |
| <a href="#">AMK58_15300</a> | <a href="#">no KO assigned   (GenBank) hypothetical protein</a>                                                        | Hypothetical                   | 33.192   | 24.317   | 29.052   | 22.884   | 33.971  | 106.103  |
| <a href="#">AMK58_15305</a> | <a href="#">no KO assigned   (GenBank) hypothetical protein</a>                                                        | Hypothetical                   | 60.981   | 63.592   | 60.300   | 68.617   | 30.658  | 247.980  |
| <a href="#">AMK58_15310</a> | <a href="#">no KO assigned   (GenBank) hypothetical protein</a>                                                        | Hypothetical                   | 1.022    | 1.526    | 3.400    | 87.936   | 8.326   | 117.007  |
| <a href="#">AMK58_15315</a> | <a href="#">no KO assigned   (GenBank) hypothetical protein</a>                                                        | Hypothetical                   | 0.922    | 4.133    | 5.482    | 211.923  | 37.588  | 316.066  |
| <a href="#">AMK58_15320</a> | <a href="#">no KO assigned   (GenBank) hypothetical protein</a>                                                        | Hypothetical                   | 22.691   | 18.627   | 30.962   | 290.032  | 133.757 | 568.737  |
| <a href="#">AMK58_15325</a> | <a href="#">no KO assigned   (GenBank) hypothetical protein</a>                                                        | Hypothetical                   | 3.401    | 4.064    | 7.761    | 245.709  | 29.818  | 155.790  |
| <a href="#">AMK58_15330</a> | <a href="#">no KO assigned   (GenBank) hypothetical protein</a>                                                        | Hypothetical                   | 0.897    | 8.037    | 8.527    | 405.465  | 25.202  | 416.229  |
| <a href="#">AMK58_15335</a> | <a href="#">no KO assigned   (GenBank) transposase</a>                                                                 | Genetic Information Processing | 0.791    | 3.377    | 2.150    | 85.560   | 4.193   | 95.707   |
| <a href="#">AMK58_15340</a> | <a href="#">no KO assigned   (GenBank) hypothetical protein</a>                                                        | Hypothetical                   | 11.087   | 12.365   | 10.823   | 69.508   | 42.207  | 275.945  |
| <a href="#">AMK58_15345</a> | <a href="#">no KO assigned   (GenBank) transposase</a>                                                                 | Genetic Information Processing | 0.813    | 0.000    | 2.404    | 57.690   | 10.656  | 78.530   |
| <a href="#">AMK58_15350</a> | <a href="#">K03427 type I restriction enzyme M protein [EC:2.1.1.72]   (GenBank) restriction endonuclease subun</a>    | DNA Repair and Replication     | 0.417    | 0.415    | 0.462    | 23.635   | 4.607   | 26.344   |
| <a href="#">AMK58_15355</a> | <a href="#">no KO assigned   (GenBank) endonuclease</a>                                                                | DNA Repair and Replication     | 1.423    | 0.000    | 1.722    | 18.367   | 6.252   | 23.869   |
| <a href="#">AMK58_15360</a> | <a href="#">K01154 type I restriction enzyme, S subunit [EC:3.1.21.31]   (GenBank) hypothetical protein</a>            | Defense                        | 25.071   | 16.701   | 21.014   | 42.009   | 16.398  | 205.099  |
| <a href="#">AMK58_15365</a> | <a href="#">K01153 type I restriction enzyme, R subunit [EC:3.1.21.31]   (GenBank) type I restriction endonucleas</a>  | Defense                        | 0.696    | 0.693    | 1.066    | 19.005   | 5.040   | 16.776   |
| <a href="#">AMK58_15370</a> | <a href="#">no KO assigned   (GenBank) hypothetical protein</a>                                                        | Hypothetical                   | 417.233  | 340.403  | 294.569  | 659.874  | 377.592 | 1863.456 |
| <a href="#">AMK58_15375</a> | <a href="#">no KO assigned   (GenBank) hypothetical protein</a>                                                        | Hypothetical                   | 30.269   | 45.729   | 23.156   | 98.104   | 35.588  | 311.323  |
| <a href="#">AMK58_15380</a> | <a href="#">no KO assigned   (GenBank) hypothetical protein</a>                                                        | Hypothetical                   | 78.184   | 67.135   | 59.591   | 146.497  | 25.973  | 643.679  |
| <a href="#">AMK58_15385</a> | <a href="#">no KO assigned   (GenBank) hypothetical protein</a>                                                        | Hypothetical                   | 322.368  | 333.398  | 326.881  | 1254.771 | 685.506 | 3251.200 |
| <a href="#">AMK58_15390</a> | <a href="#">no KO assigned   (GenBank) hypothetical protein</a>                                                        | Hypothetical                   | 17.296   | 12.157   | 11.931   | 78.594   | 37.359  | 268.567  |
| <a href="#">AMK58_15395</a> | <a href="#">no KO assigned   (GenBank) hypothetical protein</a>                                                        | Hypothetical                   | 10.258   | 10.047   | 4.797    | 59.468   | 22.493  | 252.919  |
| <a href="#">AMK58_15400</a> | <a href="#">no KO assigned   (GenBank) hypothetical protein</a>                                                        | Hypothetical                   | 6.081    | 6.606    | 8.805    | 186.625  | 27.498  | 114.705  |
| <a href="#">AMK58_15405</a> | <a href="#">no KO assigned   (GenBank) recombinase</a>                                                                 | DNA Repair and Replication     | 1.062    | 1.058    | 2.525    | 32.722   | 4.775   | 22.979   |

|                             |                                                                                                                                |                                       |          |          |          |         |          |          |
|-----------------------------|--------------------------------------------------------------------------------------------------------------------------------|---------------------------------------|----------|----------|----------|---------|----------|----------|
| <a href="#">AMK58_15410</a> | <a href="#">no KO assigned   (GenBank) hypothetical protein</a>                                                                | Hypothetical                          | 4.682    | 3.996    | 4.452    | 42.712  | 10.777   | 77.741   |
| <a href="#">AMK58_15415</a> | <a href="#">no KO assigned   (GenBank) hypothetical protein</a>                                                                | Hypothetical                          | 33.592   | 23.101   | 33.318   | 168.660 | 38.573   | 277.201  |
| <a href="#">AMK58_15420</a> | <a href="#">no KO assigned   (GenBank) hypothetical protein</a>                                                                | Hypothetical                          | 59.049   | 56.661   | 61.015   | 94.029  | 72.365   | 148.281  |
| <a href="#">AMK58_15425</a> | <a href="#">K14223 tRNA Gln   (GenBank) tRNA-Gln</a>                                                                           | tRNA synthesis/modification           | 514.971  | 704.066  | 681.504  | 733.080 | 1426.257 | 2529.810 |
| <a href="#">AMK58_15430</a> | <a href="#">no KO assigned   (GenBank) hypothetical protein</a>                                                                | Hypothetical                          | 17.239   | 17.567   | 18.419   | 20.621  | 3.759    | 128.201  |
| <a href="#">AMK58_15435</a> | <a href="#">no KO assigned   (GenBank) hypothetical protein</a>                                                                | Hypothetical                          | 11.638   | 11.369   | 14.979   | 27.624  | 7.213    | 76.652   |
| <a href="#">AMK58_15440</a> | <a href="#">no KO assigned   (GenBank) hypothetical protein</a>                                                                | Hypothetical                          | 48.295   | 63.495   | 55.257   | 240.936 | 138.210  | 504.340  |
| <a href="#">AMK58_15445</a> | <a href="#">K03924 MoxR-like ATPase [EC:3.6.3.-1]   (GenBank) AAA family ATPase</a>                                            | Enzyme                                | 5.013    | 7.488    | 6.674    | 27.703  | 18.456   | 60.435   |
| <a href="#">AMK58_15450</a> | <a href="#">K09986 uncharacterized protein   (GenBank) teophosphoglycan precursor</a>                                          | No COG                                | 127.836  | 181.786  | 158.515  | 830.177 | 270.049  | 442.613  |
| <a href="#">AMK58_15455</a> | <a href="#">no KO assigned   (GenBank) NUDIX hydrolase</a>                                                                     | hydrolase                             | 82.126   | 117.927  | 103.054  | 740.342 | 283.478  | 246.274  |
| <a href="#">AMK58_15460</a> | <a href="#">no KO assigned   (GenBank) hypothetical protein</a>                                                                | Hypothetical                          | 140.067  | 167.837  | 155.749  | 529.489 | 391.379  | 216.468  |
| <a href="#">AMK58_15465</a> | <a href="#">K00970 poly(A) polymerase [EC:2.7.7.19]   (GenBank) tRNA nucleotidyltransferase</a>                                | translation                           | 97.329   | 103.337  | 109.916  | 134.173 | 212.982  | 123.143  |
| <a href="#">AMK58_15470</a> | <a href="#">K00228 coporphyrinogen III oxidase [EC:1.3.3.3]   (GenBank) coporphyrinogen III oxidase</a>                        | Metabolism: Co-Factors and Vitamins   | 65.022   | 66.140   | 62.489   | 97.612  | 275.337  | 158.399  |
| <a href="#">AMK58_15475</a> | <a href="#">K03216 tRNA (cytidine/uridine-2'-O)-methyltransferase [EC:2.1.1.207]   (GenBank) tRNA methyltransferase</a>        | tRNA synthesis/modification           | 390.045  | 416.616  | 422.103  | 334.295 | 1813.140 | 313.834  |
| <a href="#">AMK58_15480</a> | <a href="#">K00411 ubiquinol-cytochrome c reductase iron-sulfur subunit [EC:1.10.2.2]   (GenBank) ubiquinol-cyto</a>           | Energy                                | 64.786   | 78.681   | 99.770   | 116.375 | 321.371  | 64.801   |
| <a href="#">AMK58_15485</a> | <a href="#">K00412 ubiquinol-cytochrome c reductase cytochrome b subunit   (GenBank) cytochrome b</a>                          | Energy                                | 17.078   | 26.221   | 24.493   | 157.201 | 311.974  | 87.232   |
| <a href="#">AMK58_15490</a> | <a href="#">K00413 ubiquinol-cytochrome c reductase cytochrome c1 subunit   (GenBank) cytochrome C</a>                         | Energy                                | 35.135   | 37.823   | 39.878   | 241.689 | 394.937  | 190.492  |
| <a href="#">AMK58_15495</a> | <a href="#">no KO assigned   (GenBank) hypothetical protein</a>                                                                | Hypothetical                          | 13.160   | 17.036   | 16.475   | 211.253 | 202.167  | 180.608  |
| <a href="#">AMK58_15500</a> | <a href="#">no KO assigned   (GenBank) hypothetical protein</a>                                                                | Hypothetical                          | 815.073  | 697.289  | 878.430  | 300.263 | 309.581  | 348.693  |
| <a href="#">AMK58_15505</a> | <a href="#">no KO assigned   (GenBank) hypothetical protein</a>                                                                | Hypothetical                          | 3359.003 | 2411.185 | 2657.968 | 307.152 | 636.782  | 694.686  |
| <a href="#">AMK58_15510</a> | <a href="#">no KO assigned   (GenBank) ArsR family transcriptional regulator</a>                                               | Transcription                         | 1426.328 | 1167.416 | 1383.985 | 364.918 | 392.402  | 503.031  |
| <a href="#">AMK58_15515</a> | <a href="#">K04085 tRNA 2-thiouridine synthesizing protein A [EC:2.8.1.-1]   (GenBank) SirA family protein</a>                 | tRNA synthesis/modification           | 53.103   | 63.452   | 63.113   | 490.114 | 244.132  | 606.650  |
| <a href="#">AMK58_15520</a> | <a href="#">no KO assigned   (GenBank) acetoin utilization protein</a>                                                         | No COG                                | 3.515    | 2.333    | 6.437    | 98.183  | 44.779   | 126.152  |
| <a href="#">AMK58_15525</a> | <a href="#">K03602 exodeoxyribonuclease VII small subunit [EC:3.1.11.6]   (GenBank) exodeoxyribonuclease VII</a>               | DNA Repair and Replication            | 131.046  | 158.855  | 138.143  | 273.490 | 488.868  | 426.184  |
| <a href="#">AMK58_15530</a> | <a href="#">K00795 farnesyl diphosphate synthase [EC:2.5.1.1 2.5.1.10]   (GenBank) farnesyl-diphosphate synthase</a>           | Metabolism: terpenoids and polyketide | 73.817   | 77.780   | 68.948   | 20.404  | 166.531  | 113.477  |
| <a href="#">AMK58_15535</a> | <a href="#">K01662 1-deoxy-D-xylulose-5-phosphate synthase [EC:2.2.1.7]   (GenBank) 1-deoxy-D-xylulose-5-phos</a>              | Biosynthesis: Terpenoids              | 4.674    | 6.792    | 4.564    | 42.979  | 5.537    | 38.419   |
| <a href="#">AMK58_15540</a> | <a href="#">no KO assigned   (GenBank) hypothetical protein</a>                                                                | Hypothetical                          | 114.948  | 90.718   | 102.961  | 149.696 | 60.636   | 215.153  |
| <a href="#">AMK58_15545</a> | <a href="#">K06442 23S rRNA (cytidine1920-2'-O)/16S rRNA (cytidine1409-2'-O)-methyltransferase [EC:2.1.1.226 2</a>             | Ribosome                              | 16.883   | 21.134   | 19.110   | 39.416  | 35.785   | 80.363   |
| <a href="#">AMK58_15550</a> | <a href="#">no KO assigned   (GenBank) pseudogene</a>                                                                          | Pseudogene                            | 139.328  | 151.074  | 151.740  | 252.588 | 210.257  | 206.527  |
| <a href="#">AMK58_15555</a> | <a href="#">no KO assigned   (GenBank) LysR family transcriptional regulator</a>                                               | Transcription                         | 299.290  | 334.224  | 315.849  | 448.018 | 488.378  | 384.048  |
| <a href="#">AMK58_15560</a> | <a href="#">no KO assigned   (GenBank) hypothetical protein</a>                                                                | Hypothetical                          | 1203.777 | 1519.047 | 1370.264 | 690.519 | 1016.163 | 701.175  |
| <a href="#">AMK58_15565</a> | <a href="#">no KO assigned   (GenBank) short-chain dehydrogenase</a>                                                           | dehydrogenase                         | 80.256   | 97.181   | 99.361   | 140.602 | 201.466  | 307.923  |
| <a href="#">AMK58_15570</a> | <a href="#">no KO assigned   (GenBank) MarR family transcriptional regulator</a>                                               | Transcription                         | 5.364    | 9.156    | 6.072    | 88.621  | 153.607  | 398.628  |
| <a href="#">AMK58_15575</a> | <a href="#">no KO assigned   (GenBank) hydrolase</a>                                                                           | hydrolase                             | 80.717   | 76.499   | 73.356   | 95.965  | 157.045  | 325.387  |
| <a href="#">AMK58_15580</a> | <a href="#">K00108 choline dehydrogenase [EC:1.1.99.1]   (GenBank) oxidoreductase</a>                                          | Metabolism: Amino Acid                | 3.076    | 3.137    | 1.926    | 12.561  | 23.947   | 47.579   |
| <a href="#">AMK58_15585</a> | <a href="#">no KO assigned   (GenBank) LysR family transcriptional regulator</a>                                               | Transcription                         | 23.906   | 26.884   | 26.874   | 89.475  | 110.013  | 310.078  |
| <a href="#">AMK58_15590</a> | <a href="#">no KO assigned   (GenBank) ethyl tert-butyl ether degradation protein EthD</a>                                     | Metabolism                            | 87.577   | 77.158   | 71.374   | 110.286 | 92.543   | 497.729  |
| <a href="#">AMK58_15595</a> | <a href="#">no KO assigned   (GenBank) dehydrogenase</a>                                                                       | dehydrogenase                         | 8.805    | 9.645    | 9.349    | 102.619 | 32.827   | 205.079  |
| <a href="#">AMK58_15600</a> | <a href="#">no KO assigned   (GenBank) dehalogenase</a>                                                                        | enzyme                                | 21.106   | 21.300   | 21.242   | 223.889 | 84.798   | 375.158  |
| <a href="#">AMK58_15605</a> | <a href="#">no KO assigned   (GenBank) glyoxalase</a>                                                                          | enzyme                                | 27.362   | 32.694   | 30.352   | 131.948 | 116.871  | 477.833  |
| <a href="#">AMK58_15610</a> | <a href="#">no KO assigned   (GenBank) hypothetical protein</a>                                                                | Hypothetical                          | 8.171    | 4.438    | 12.006   | 68.324  | 49.817   | 215.356  |
| <a href="#">AMK58_15615</a> | <a href="#">K16137 TetR/AcrR family transcriptional regulator, transcriptional repressor for nem operon   (GenBa</a>           | Transcription                         | 22.166   | 26.236   | 22.666   | 126.611 | 114.234  | 290.854  |
| <a href="#">AMK58_15620</a> | <a href="#">no KO assigned   (GenBank) polyketide cyclase</a>                                                                  | No COG                                | 60.045   | 60.770   | 68.635   | 121.310 | 234.198  | 523.317  |
| <a href="#">AMK58_15625</a> | <a href="#">no KO assigned   (GenBank) arylesterase</a>                                                                        | esterase                              | 31.374   | 25.560   | 33.220   | 77.941  | 75.180   | 202.588  |
| <a href="#">AMK58_15630</a> | <a href="#">no KO assigned   (GenBank) XRE family transcriptional regulator</a>                                                | Transcription                         | 20.608   | 20.521   | 23.405   | 45.243  | 88.155   | 134.034  |
| <a href="#">AMK58_15635</a> | <a href="#">K06893 uncharacterized protein   (GenBank) hypothetical protein</a>                                                | Hypothetical                          | 118.752  | 88.468   | 103.248  | 73.509  | 401.100  | 320.924  |
| <a href="#">AMK58_15640</a> | <a href="#">no KO assigned   (GenBank) thymidylate synthase</a>                                                                | No COG                                | 3.483    | 6.120    | 5.649    | 65.039  | 12.895   | 198.324  |
| <a href="#">AMK58_15645</a> | <a href="#">no KO assigned   (GenBank) AAA family ATPase</a>                                                                   | Transcription                         | 2.565    | 2.617    | 3.094    | 44.507  | 8.440    | 108.904  |
| <a href="#">AMK58_15650</a> | <a href="#">no KO assigned   (GenBank) acetoin catabolism protein X</a>                                                        | Metabolism                            | 38.624   | 29.708   | 41.122   | 158.468 | 31.976   | 211.028  |
| <a href="#">AMK58_15655</a> | <a href="#">K00161 pyruvate dehydrogenase E1 component alpha subunit [EC:1.2.4.1]   (GenBank) ABC transporter s</a>            | Transport                             | 15.503   | 12.497   | 23.047   | 36.261  | 28.353   | 110.216  |
| <a href="#">AMK58_15660</a> | <a href="#">K00162 pyruvate dehydrogenase E1 component beta subunit [EC:1.2.4.1]   (GenBank) pyruvate dehydro</a>              | dehydrogenase                         | 11.497   | 15.420   | 14.167   | 61.763  | 27.957   | 152.195  |
| <a href="#">AMK58_15665</a> | <a href="#">K00627 pyruvate dehydrogenase E2 component (dihydroliipoamide acetyltransferase) [EC:2.3.1.12]   (Gen</a>          | Metabolism: Carbohydrate              | 54.772   | 80.373   | 72.990   | 332.667 | 100.570  | 323.444  |
| <a href="#">AMK58_15670</a> | <a href="#">K03366 meso-butane-1,2-diol dehydrogenase / (S,S)-butane-1,2-diol dehydrogenase / diacetyl reductase [EC:1.1.1</a> | Metabolism: Carbohydrate              | 174.218  | 285.293  | 129.765  | 150.012 | 32.205   | 118.126  |
| <a href="#">AMK58_15675</a> | <a href="#">K03644 lipovI synthase [EC:2.8.1.8]   (GenBank) lipovI synthase</a>                                                | Metabolism: Lipid                     | 1136.758 | 1322.212 | 646.698  | 253.703 | 23.243   | 149.571  |
| <a href="#">AMK58_15680</a> | <a href="#">no KO assigned   (GenBank) oxidoreductase</a>                                                                      | Oxidoreductase                        | 887.101  | 966.472  | 498.319  | 128.584 | 50.001   | 143.490  |
| <a href="#">AMK58_15685</a> | <a href="#">K18335 2-keto-3-deoxy-L-fuconate dehydrogenase [EC:1.1.1.-1]   (GenBank) NAD(P)-dependent oxidore</a>              | Energy                                | 1035.808 | 1112.256 | 597.721  | 302.137 | 40.791   | 197.528  |
| <a href="#">AMK58_15690</a> | <a href="#">no KO assigned   (GenBank) C4-dicarboxylate ABC transporter</a>                                                    | Membrane Transport                    | 260.486  | 325.256  | 148.010  | 76.725  | 13.067   | 91.761   |
| <a href="#">AMK58_15695</a> | <a href="#">no KO assigned   (GenBank) C4-dicarboxylate ABC transporter</a>                                                    | Membrane Transport                    | 412.231  | 588.444  | 306.527  | 360.091 | 56.705   | 390.048  |
| <a href="#">AMK58_15700</a> | <a href="#">no KO assigned   (GenBank) C4-dicarboxylate ABC transporter</a>                                                    | Membrane Transport                    | 81.330   | 85.747   | 65.899   | 281.319 | 34.471   | 187.457  |
| <a href="#">AMK58_15705</a> | <a href="#">no KO assigned   (GenBank) GntR family transcriptional regulator</a>                                               | Transcription                         | 61.755   | 32.218   | 49.951   | 193.411 | 30.895   | 171.953  |
| <a href="#">AMK58_15710</a> | <a href="#">K18910 D-psicose/D-tagatose/L-ribulose 3-epimerase [EC:5.1.3.30 5.1.3.31]   (GenBank) hypothetical p</a>           | Enzyme                                | 267.249  | 147.398  | 195.797  | 107.933 | 55.463   | 319.089  |
| <a href="#">AMK58_15715</a> | <a href="#">no KO assigned   (GenBank) hypothetical protein</a>                                                                | Hypothetical                          | 187.673  | 105.649  | 136.950  | 35.150  | 34.785   | 98.120   |
| <a href="#">AMK58_15720</a> | <a href="#">no KO assigned   (GenBank) hypothetical protein</a>                                                                | Hypothetical                          | 462.908  | 263.153  | 333.234  | 54.627  | 54.840   | 190.341  |
| <a href="#">AMK58_15725</a> | <a href="#">K07068 uncharacterized protein   (GenBank) hypothetical protein</a>                                                | Hypothetical                          | 214.441  | 208.729  | 187.569  | 348.982 | 150.312  | 621.672  |
| <a href="#">AMK58_15730</a> | <a href="#">no KO assigned   (GenBank) hypothetical protein</a>                                                                | Hypothetical                          | 121.390  | 129.978  | 100.729  | 412.645 | 122.626  | 422.473  |
| <a href="#">AMK58_15735</a> | <a href="#">no KO assigned   (GenBank) acvl dehydratase</a>                                                                    | dehydratase                           | 49.695   | 75.574   | 72.450   | 512.782 | 33.177   | 179.017  |
| <a href="#">AMK58_15740</a> | <a href="#">no KO assigned   (GenBank) hypothetical protein</a>                                                                | Hypothetical                          | 32.903   | 29.050   | 38.219   | 258.586 | 18.765   | 137.820  |

|                             |                                                                                                                         |                                     |          |          |          |          |          |          |
|-----------------------------|-------------------------------------------------------------------------------------------------------------------------|-------------------------------------|----------|----------|----------|----------|----------|----------|
| <a href="#">AMK58_15745</a> | <a href="#">K01999 branched-chain amino acid transport system substrate-binding protein   (GenBank) hypothetical</a>    | Transport: Amino Acid               | 6.867    | 8.837    | 11.150   | 84.490   | 7.482    | 39.774   |
| <a href="#">AMK58_15750</a> | <a href="#">K01997 branched-chain amino acid transport system permease protein   (GenBank) branched-chain amino</a>     | Transport: Amino Acid               | 14.854   | 20.930   | 13.857   | 99.301   | 8.033    | 73.157   |
| <a href="#">AMK58_15755</a> | <a href="#">K01995 branched-chain amino acid transport system ATP-binding protein K01998 branched-chain amino a</a>     | Transport: Amino Acid               | 8.740    | 8.490    | 8.715    | 30.172   | 3.913    | 19.700   |
| <a href="#">AMK58_15760</a> | <a href="#">K01996 branched-chain amino acid transport system ATP-binding protein   (GenBank) ABC transporter A</a>     | Transport: Amino Acid               | 18.120   | 20.667   | 21.614   | 163.069  | 6.851    | 79.582   |
| <a href="#">AMK58_15765</a> | <a href="#">no KO assigned   (GenBank) hypothetical protein</a>                                                         | Hypothetical                        | 99.656   | 105.068  | 108.795  | 173.059  | 36.748   | 235.306  |
| <a href="#">AMK58_15770</a> | <a href="#">K02182 crotonobetaine/carnitine-CoA ligase [EC:6.2.1.-1]   (GenBank) hypothetical protein</a>               | Enzyme                              | 28.953   | 32.761   | 38.234   | 110.181  | 15.943   | 105.897  |
| <a href="#">AMK58_15775</a> | <a href="#">no KO assigned   (GenBank) hypothetical protein</a>                                                         | Hypothetical                        | 238.306  | 249.730  | 289.168  | 1746.716 | 173.357  | 1009.536 |
| <a href="#">AMK58_15780</a> | <a href="#">no KO assigned   (GenBank) FAD-dependent oxidoreductase</a>                                                 | Oxidoreductase                      | 13.350   | 19.633   | 16.599   | 78.548   | 21.008   | 108.937  |
| <a href="#">AMK58_15785</a> | <a href="#">no KO assigned   (GenBank) hypothetical protein</a>                                                         | Hypothetical                        | 278.145  | 295.424  | 266.882  | 381.356  | 121.380  | 490.548  |
| <a href="#">AMK58_15790</a> | <a href="#">K07638 two-component system, OmpR family, osmolarity sensor histidine kinase EnvZ [EC:2.7.13.31]   (G</a>   | Signal Transduction                 | 50.380   | 58.239   | 62.020   | 276.534  | 131.690  | 230.791  |
| <a href="#">AMK58_15795</a> | <a href="#">K07659 two-component system, OmpR family, phosphate regulon response regulator OmpR   (GenBank)  </a>       | Signal transduction                 | 23.384   | 25.871   | 23.386   | 66.359   | 216.503  | 106.166  |
| <a href="#">AMK58_15800</a> | <a href="#">no KO assigned   (GenBank) hypothetical protein</a>                                                         | Hypothetical                        | 60.876   | 71.056   | 67.260   | 77.771   | 50.053   | 95.858   |
| <a href="#">AMK58_15805</a> | <a href="#">K03704 cold shock protein (beta-ribbon, CspA family)   (GenBank) cold-shock protein</a>                     | Stress Response                     | 15.207   | 34.945   | 18.352   | 314.186  | 54.569   | 118.236  |
| <a href="#">AMK58_15810</a> | <a href="#">no KO assigned   (GenBank) MarR family transcriptional regulator</a>                                        | Transcription                       | 129.099  | 163.566  | 164.712  | 482.132  | 184.110  | 363.290  |
| <a href="#">AMK58_15815</a> | <a href="#">K00826 branched-chain amino acid aminotransferase [EC:2.6.1.421]   (GenBank) branched-chain amino aci</a>   | Metabolism                          | 52.840   | 77.887   | 81.229   | 219.592  | 86.364   | 123.587  |
| <a href="#">AMK58_15820</a> | <a href="#">no KO assigned   (GenBank) hypothetical protein</a>                                                         | Hypothetical                        | 614.849  | 884.800  | 1084.787 | 1357.660 | 471.790  | 795.976  |
| <a href="#">AMK58_15825</a> | <a href="#">no KO assigned   (GenBank) addiction module toxin RelE</a>                                                  | defense                             | 1043.277 | 1141.041 | 1123.392 | 60.873   | 3517.348 | 383.377  |
| <a href="#">AMK58_15830</a> | <a href="#">K03702 excinuclease ABC subunit B   (GenBank) excinuclease ABC subunit B</a>                                | DNA Repair and Replication          | 31.132   | 32.465   | 35.144   | 22.065   | 145.128  | 43.827   |
| <a href="#">AMK58_15835</a> | <a href="#">no KO assigned   (GenBank) hypothetical protein</a>                                                         | Hypothetical                        | 365.915  | 434.013  | 390.125  | 356.809  | 1763.667 | 668.628  |
| <a href="#">AMK58_15840</a> | <a href="#">no KO assigned   (GenBank) hypothetical protein</a>                                                         | Hypothetical                        | 53.594   | 58.335   | 55.806   | 41.418   | 148.654  | 124.744  |
| <a href="#">AMK58_15845</a> | <a href="#">no KO assigned   (GenBank) MES transporter</a>                                                              | Transport: MFS                      | 60.859   | 49.981   | 62.236   | 192.727  | 488.055  | 388.298  |
| <a href="#">AMK58_15850</a> | <a href="#">no KO assigned   (GenBank) histidine kinase</a>                                                             | Signal Transduction                 | 26.097   | 26.662   | 29.702   | 20.923   | 74.153   | 61.802   |
| <a href="#">AMK58_15855</a> | <a href="#">K02339 DNA polymerase III subunit chi [EC:2.7.7.1]   (GenBank) DNA polymerase III subunit chi</a>           | DNA Repair and Replication          | 904.025  | 1043.239 | 1043.745 | 388.886  | 345.072  | 772.665  |
| <a href="#">AMK58_15860</a> | <a href="#">K01255 leucyl aminopeptidase [EC:3.4.11.11]   (GenBank) aminopeptidase</a>                                  | Peptidase                           | 19.494   | 21.657   | 29.795   | 224.125  | 109.019  | 186.892  |
| <a href="#">AMK58_15865</a> | <a href="#">K11720 lipopolysaccharide export system permease protein   (GenBank) LPS export ABC transporter perm</a>    | Transport: polysaccharide           | 130.584  | 165.810  | 147.920  | 189.883  | 96.943   | 285.442  |
| <a href="#">AMK58_15870</a> | <a href="#">K03771 peptidyl-prolyl cis-trans isomerase SurA [EC:5.2.1.81]   (GenBank) peptidylprolyl isomerase</a>      | Chaperone                           | 34.725   | 34.661   | 30.139   | 69.154   | 41.301   | 94.961   |
| <a href="#">AMK58_15875</a> | <a href="#">K00097 4-hydroxythreonine-4-phosphate dehydrogenase [EC:1.1.1.262]   (GenBank) 4-hydroxythreonine-</a>      | Metabolism: Co-Factors and Vitamins | 331.926  | 328.990  | 316.269  | 318.540  | 628.753  | 258.580  |
| <a href="#">AMK58_15880</a> | <a href="#">no KO assigned   (GenBank) histidine kinase</a>                                                             | Signal Transduction                 | 31.587   | 30.569   | 28.246   | 68.749   | 52.759   | 116.240  |
| <a href="#">AMK58_15885</a> | <a href="#">no KO assigned   (GenBank) hypothetical protein</a>                                                         | Hypothetical                        | 285.184  | 205.151  | 226.846  | 432.794  | 259.655  | 241.700  |
| <a href="#">AMK58_15890</a> | <a href="#">no KO assigned   (GenBank) murein transglycosylase</a>                                                      | transglycosylase                    | 61.135   | 73.229   | 80.868   | 199.829  | 148.862  | 73.599   |
| <a href="#">AMK58_15895</a> | <a href="#">no KO assigned   (GenBank) alpha/beta hydrolase</a>                                                         | hydrolase                           | 424.048  | 526.699  | 532.867  | 739.805  | 1003.647 | 323.538  |
| <a href="#">AMK58_15900</a> | <a href="#">no KO assigned   (GenBank) hypothetical protein</a>                                                         | Hypothetical                        | 22.592   | 19.656   | 24.400   | 273.836  | 29.339   | 134.032  |
| <a href="#">AMK58_15905</a> | <a href="#">K02528 16S rRNA (adenine1518-N6/adenine1519-N6)-dimethyltransferase [EC:1.1.1.182]   (GenBank)  </a>        | Ribosome                            | 38.932   | 51.973   | 59.661   | 185.492  | 195.083  | 130.651  |
| <a href="#">AMK58_15910</a> | <a href="#">K00942 guanylate kinase [EC:2.7.4.81]   (GenBank) guanylate kinase</a>                                      | Metabolism: Nucleotide              | 119.393  | 145.118  | 169.658  | 267.306  | 209.180  | 290.550  |
| <a href="#">AMK58_15915</a> | <a href="#">no KO assigned   (GenBank) hypothetical protein</a>                                                         | Hypothetical                        | 57.116   | 82.598   | 70.638   | 134.126  | 101.717  | 156.944  |
| <a href="#">AMK58_15920</a> | <a href="#">no KO assigned   (GenBank) short-chain dehydrogenase</a>                                                    | dehydrogenase                       | 59.425   | 72.146   | 68.739   | 285.422  | 139.487  | 227.191  |
| <a href="#">AMK58_15925</a> | <a href="#">K00570 phosphatidylethanolamine/phosphatidyl-N-methylthanolamine N-methyltransferase [EC:2.1.1.17</a>       | Metabolism: Lipid                   | 81.898   | 104.681  | 100.706  | 210.710  | 115.292  | 250.279  |
| <a href="#">AMK58_15930</a> | <a href="#">no KO assigned   (GenBank) hypothetical protein</a>                                                         | Hypothetical                        | 85.546   | 87.586   | 90.193   | 257.372  | 136.093  | 154.811  |
| <a href="#">AMK58_15935</a> | <a href="#">K06158 ATP-binding cassette, subfamily F, member 3   (GenBank) glycosyl transferase family 1</a>            | Glycosyl Transferase                | 12.325   | 9.538    | 11.597   | 47.646   | 28.425   | 42.397   |
| <a href="#">AMK58_15940</a> | <a href="#">K00940 nucleoside-diphosphate kinase [EC:2.7.4.61]   (GenBank) ndk: phosphodiesterase</a>                   | Metabolism: Nucleotide              | 398.431  | 417.255  | 354.882  | 126.145  | 388.654  | 388.299  |
| <a href="#">AMK58_15945</a> | <a href="#">no KO assigned   (GenBank) hypothetical protein</a>                                                         | Hypothetical                        | 60.537   | 66.308   | 87.538   | 358.160  | 135.810  | 251.905  |
| <a href="#">AMK58_15950</a> | <a href="#">K11175 phosphoribosylglucosylamine formyltransferase 1 [EC:2.1.2.21]   (GenBank) phosphoribosylglucosyl</a> | Metabolism                          | 264.953  | 270.312  | 270.160  | 375.767  | 532.371  | 416.522  |
| <a href="#">AMK58_15955</a> | <a href="#">K01933 phosphoribosylformylglucosylamine cyclo-ligase [EC:6.3.3.11]   (GenBank) phosphoribosylaminol</a>    | Metabolism: Nucleotide              | 762.447  | 620.496  | 712.292  | 34.444   | 198.673  | 114.965  |
| <a href="#">AMK58_15960</a> | <a href="#">no KO assigned   (GenBank) hypothetical protein</a>                                                         | Hypothetical                        | 85.367   | 142.389  | 126.410  | 40.491   | 166.990  | 80.237   |
| <a href="#">AMK58_15965</a> | <a href="#">K08744 cardiolipin synthase (CMP-forming) [EC:2.7.8.41]   (GenBank) CDP-alcohol phosphatidyltransfe</a>     | Metabolism: Lipid                   | 131.650  | 143.124  | 162.316  | 313.386  | 96.308   | 140.287  |
| <a href="#">AMK58_15970</a> | <a href="#">no KO assigned   (GenBank) hypothetical protein</a>                                                         | Hypothetical                        | 330.733  | 262.233  | 351.102  | 167.378  | 140.578  | 107.195  |
| <a href="#">AMK58_15975</a> | <a href="#">no KO assigned   (GenBank) DNA replication protein</a>                                                      | DNA Repair and Replication          | 227.114  | 225.044  | 280.048  | 273.914  | 183.770  | 195.041  |
| <a href="#">AMK58_15980</a> | <a href="#">K00059 3-oxoacyl-[acyl-carrier protein] reductase [EC:1.1.1.1001]   (GenBank) 3-oxoacyl-ACP reductase</a>   | Metabolism: Lipid                   | 75.284   | 69.553   | 79.845   | 167.592  | 68.221   | 138.754  |
| <a href="#">AMK58_15985</a> | <a href="#">no KO assigned   (GenBank) metal-chelation protein CHAD</a>                                                 | No COG                              | 55.718   | 52.182   | 64.647   | 102.375  | 49.596   | 147.249  |
| <a href="#">AMK58_15990</a> | <a href="#">K08296 phosphohistidine phosphatase [EC:3.1.3.-1]   (GenBank) phosphohistidine phosphatase</a>              | Hydrolases                          | 46.657   | 44.600   | 59.223   | 312.497  | 83.124   | 89.772   |
| <a href="#">AMK58_15995</a> | <a href="#">K00937 polyphosphate kinase [EC:2.7.4.11]   (GenBank) polyphosphate kinase</a>                              | Signal Transduction                 | 32.862   | 45.462   | 40.624   | 71.730   | 34.720   | 49.601   |
| <a href="#">AMK58_16000</a> | <a href="#">K01524 exopolysphatase / guanosine-5'-triphosphate 3'-diphosphate pyrophosphatase [EC:3.6.1.11.3</a>        | Metabolism: Nucleotide              | 20.336   | 22.048   | 23.666   | 150.616  | 42.893   | 77.686   |
| <a href="#">AMK58_16005</a> | <a href="#">no KO assigned   (GenBank) hypothetical protein</a>                                                         | Hypothetical                        | 9.778    | 13.173   | 13.034   | 118.397  | 25.107   | 54.935   |
| <a href="#">AMK58_16010</a> | <a href="#">K03684 ribonuclease D [EC:3.1.13.51]   (GenBank) ribonuclease D</a>                                         | post translation modificaton        | 311.972  | 330.996  | 317.933  | 279.343  | 225.423  | 397.225  |
| <a href="#">AMK58_16015</a> | <a href="#">K01876 aspartyl-tRNA synthetase [EC:6.1.1.121]   (GenBank) aspartate--tRNA(Asp/Asn) ligase</a>              | tRNA synthesis/modification         | 103.476  | 137.951  | 131.789  | 131.078  | 154.908  | 123.619  |
| <a href="#">AMK58_16020</a> | <a href="#">no KO assigned   (GenBank) hypothetical protein</a>                                                         | Hypothetical                        | 4192.480 | 4397.240 | 3796.905 | 398.351  | 576.605  | 1291.594 |
| <a href="#">AMK58_16025</a> | <a href="#">no KO assigned   (GenBank) hypothetical protein</a>                                                         | Hypothetical                        | 313.354  | 318.244  | 300.911  | 183.847  | 98.824   | 246.464  |
| <a href="#">AMK58_16030</a> | <a href="#">no KO assigned   (GenBank) D-glycerate dehydrogenase</a>                                                    | dehydrogenase                       | 1006.503 | 849.411  | 848.171  | 220.356  | 469.087  | 403.466  |
| <a href="#">AMK58_16035</a> | <a href="#">no KO assigned   (GenBank) pseudogene</a>                                                                   | Pseudogene                          | 259.899  | 308.026  | 293.255  | 59.440   | 179.558  | 168.894  |
| <a href="#">AMK58_16040</a> | <a href="#">K07716 two-component system, cell cycle sensor histidine kinase PleC [EC:2.7.13.31]   (GenBank) hypot</a>   | Signal Transduction                 | 175.751  | 178.136  | 158.803  | 46.580   | 186.940  | 110.300  |
| <a href="#">AMK58_16045</a> | <a href="#">K11443 two-component system, cell cycle response regulator DivK   (GenBank) two-component system re</a>     | Cell Cycle/Shape/Homeostasis        | 57.334   | 45.927   | 51.164   | 425.202  | 45.004   | 513.233  |
| <a href="#">AMK58_16050</a> | <a href="#">K02488 two-component system, cell cycle response regulator [EC:2.7.7.651]   (GenBank) pleD: response</a>    | Cell Cycle/Shape/Homeostasis        | 50.231   | 70.887   | 65.382   | 72.392   | 9.053    | 83.841   |
| <a href="#">AMK58_16055</a> | <a href="#">K02913 large subunit ribosomal protein L33   (GenBank) 50S ribosomal protein L33</a>                        | Ribosome                            | 188.819  | 284.175  | 241.887  | 1757.979 | 415.570  | 2080.999 |
| <a href="#">AMK58_16060</a> | <a href="#">K03797 carboxyl-terminal processing protease [EC:3.4.21.1021]   (GenBank) peptidase S41</a>                 | Peptidase                           | 47.098   | 46.897   | 41.313   | 16.569   | 23.083   | 73.523   |
| <a href="#">AMK58_16065</a> | <a href="#">K12573 ribonuclease R [EC:3.1.-.-1]   (GenBank) RNase R</a>                                                 | Genetic Information Processing      | 78.454   | 86.451   | 77.246   | 51.947   | 77.835   | 139.251  |
| <a href="#">AMK58_16070</a> | <a href="#">no KO assigned   (GenBank) hypothetical protein</a>                                                         | Hypothetical                        | 533.204  | 578.684  | 479.437  | 64.874   | 594.540  | 190.638  |
| <a href="#">AMK58_16075</a> | <a href="#">no KO assigned   (GenBank) pseudogene</a>                                                                   | Pseudogene                          | 608.862  | 638.021  | 681.081  | 401.571  | 104.357  | 273.821  |

|                             |                                                                                                                       |                                |         |         |         |          |          |          |
|-----------------------------|-----------------------------------------------------------------------------------------------------------------------|--------------------------------|---------|---------|---------|----------|----------|----------|
| <a href="#">AMK58_16080</a> | <a href="#">no KO assigned   (GenBank) pseudogene</a>                                                                 | Pseudogene                     | 68.246  | 62.312  | 79.764  | 713.436  | 142.210  | 734.588  |
| <a href="#">AMK58_16085</a> | <a href="#">K03723 transcription-repair coupling factor (superfamily II helicase) [EC:3.6.4.-1]   (GenBank) hypot</a> | Transcription                  | 5.309   | 5.008   | 7.553   | 16.951   | 10.141   | 24.579   |
| <a href="#">AMK58_16090</a> | <a href="#">no KO assigned   (GenBank) hypothetical protein</a>                                                       | Hypothetical                   | 3.622   | 7.728   | 6.395   | 83.865   | 35.477   | 114.069  |
| <a href="#">AMK58_16095</a> | <a href="#">no KO assigned   (GenBank) hypothetical protein</a>                                                       | Hypothetical                   | 4.646   | 6.939   | 9.386   | 249.696  | 84.528   | 133.539  |
| <a href="#">AMK58_16100</a> | <a href="#">no KO assigned   (GenBank) hypothetical protein</a>                                                       | Hypothetical                   | 12.726  | 19.550  | 40.793  | 1698.812 | 519.851  | 1352.630 |
| <a href="#">AMK58_16105</a> | <a href="#">no KO assigned   (GenBank) hypothetical protein</a>                                                       | Hypothetical                   | 38.604  | 38.439  | 47.827  | 564.125  | 467.451  | 1191.577 |
| <a href="#">AMK58_16110</a> | <a href="#">no KO assigned   (GenBank) polyketide cyclase</a>                                                         | No COG                         | 4.853   | 10.682  | 9.229   | 83.146   | 150.736  | 229.276  |
| <a href="#">AMK58_16115</a> | <a href="#">no KO assigned   (GenBank) hypothetical protein</a>                                                       | Hypothetical                   | 7.088   | 3.457   | 4.676   | 59.681   | 13.658   | 97.649   |
| <a href="#">AMK58_16120</a> | <a href="#">no KO assigned   (GenBank) hypothetical protein</a>                                                       | Hypothetical                   | 3.722   | 3.511   | 4.284   | 10.760   | 4.514    | 19.166   |
| <a href="#">AMK58_16125</a> | <a href="#">no KO assigned   (GenBank) hypothetical protein</a>                                                       | Hypothetical                   | 11.822  | 13.395  | 11.241  | 21.934   | 8.554    | 53.804   |
| <a href="#">AMK58_16130</a> | <a href="#">no KO assigned   (GenBank) hypothetical protein</a>                                                       | Hypothetical                   | 64.780  | 56.879  | 60.019  | 228.169  | 55.600   | 299.770  |
| <a href="#">AMK58_16135</a> | <a href="#">K01999 branched-chain amino acid transport system substrate-binding protein   (GenBank) ABC transpor</a>  | Transport: Amino Acid          | 24.904  | 27.640  | 27.610  | 187.635  | 39.168   | 142.208  |
| <a href="#">AMK58_16140</a> | <a href="#">no KO assigned   (GenBank) N-methylproline demethylase</a>                                                | No COG                         | 7.882   | 7.081   | 8.847   | 130.908  | 18.319   | 54.019   |
| <a href="#">AMK58_16145</a> | <a href="#">K00111 glycerol-3-phosphate dehydrogenase [EC:1.1.5.3]   (GenBank) hypothetical protein</a>               | Lipid metabolism               | 6.624   | 5.062   | 7.836   | 61.078   | 13.073   | 43.565   |
| <a href="#">AMK58_16150</a> | <a href="#">no KO assigned   (GenBank) transcriptional regulator</a>                                                  | Transcription                  | 34.764  | 40.584  | 37.866  | 160.045  | 57.192   | 397.452  |
| <a href="#">AMK58_16155</a> | <a href="#">no KO assigned   (GenBank) hypothetical protein</a>                                                       | Hypothetical                   | 16.320  | 11.338  | 20.329  | 208.452  | 130.263  | 459.754  |
| <a href="#">AMK58_16160</a> | <a href="#">no KO assigned   (GenBank) hypothetical protein</a>                                                       | Hypothetical                   | 31.710  | 32.532  | 24.668  | 190.504  | 75.607   | 439.723  |
| <a href="#">AMK58_16165</a> | <a href="#">no KO assigned   (GenBank) hypothetical protein</a>                                                       | Hypothetical                   | 10.312  | 13.691  | 9.321   | 41.783   | 44.792   | 184.873  |
| <a href="#">AMK58_16170</a> | <a href="#">no KO assigned   (GenBank) hypothetical protein</a>                                                       | Hypothetical                   | 22.937  | 19.469  | 22.166  | 89.823   | 45.505   | 233.256  |
| <a href="#">AMK58_16175</a> | <a href="#">K02034 peptide/nickel transport system permease protein   (GenBank) hypothetical protein</a>              | Quorum sensing                 | 31.854  | 40.473  | 29.328  | 98.663   | 51.683   | 180.834  |
| <a href="#">AMK58_16180</a> | <a href="#">K02033 peptide/nickel transport system permease protein   (GenBank) hypothetical protein</a>              | Quorum sensing                 | 26.315  | 29.478  | 24.299  | 53.892   | 47.355   | 185.943  |
| <a href="#">AMK58_16185</a> | <a href="#">K02035 peptide/nickel transport system substrate-binding protein   (GenBank) hypothetical protein</a>     | Quorum sensing                 | 32.611  | 23.639  | 25.415  | 33.803   | 80.351   | 164.613  |
| <a href="#">AMK58_16190</a> | <a href="#">no KO assigned   (GenBank) hypothetical protein</a>                                                       | Hypothetical                   | 44.285  | 39.438  | 33.527  | 28.430   | 133.088  | 185.721  |
| <a href="#">AMK58_16195</a> | <a href="#">no KO assigned   (GenBank) integrase</a>                                                                  | Genetic Information Processing | 177.816 | 145.626 | 135.635 | 353.276  | 362.915  | 927.429  |
| <a href="#">AMK58_16200</a> | <a href="#">K03088 RNA polymerase sigma-70 factor, ECF subfamily   (GenBank) hypothetical protein</a>                 | Transcription                  | 190.473 | 121.894 | 150.943 | 175.552  | 174.260  | 416.213  |
| <a href="#">AMK58_16205</a> | <a href="#">no KO assigned   (GenBank) hypothetical protein</a>                                                       | Hypothetical                   | 85.665  | 79.449  | 70.571  | 128.423  | 124.274  | 457.968  |
| <a href="#">AMK58_16210</a> | <a href="#">no KO assigned   (GenBank) hypothetical protein</a>                                                       | Hypothetical                   | 56.502  | 70.917  | 66.814  | 155.826  | 409.881  | 425.744  |
| <a href="#">AMK58_16215</a> | <a href="#">no KO assigned   (GenBank) hypothetical protein</a>                                                       | Hypothetical                   | 36.948  | 54.337  | 42.697  | 399.754  | 1548.779 | 741.085  |
| <a href="#">AMK58_16220</a> | <a href="#">K02277 cytochrome c oxidase subunit IV [EC:1.9.3.1]   (GenBank) hypothetical protein</a>                  | Energy                         | 4.535   | 5.418   | 6.467   | 447.074  | 202.866  | 501.219  |
| <a href="#">AMK58_16225</a> | <a href="#">K02276 cytochrome c oxidase subunit III [EC:1.9.3.1]   (GenBank) hypothetical protein</a>                 | Energy                         | 4.484   | 3.494   | 6.117   | 89.842   | 32.654   | 133.603  |
| <a href="#">AMK58_16230</a> | <a href="#">K02274 cytochrome c oxidase subunit I [EC:1.9.3.1]   (GenBank) cytochrome C oxidase subunit I</a>         | Energy                         | 0.587   | 0.438   | 1.186   | 26.540   | 5.609    | 30.483   |
| <a href="#">AMK58_16235</a> | <a href="#">K02275 cytochrome c oxidase subunit II [EC:1.9.3.1]   (GenBank) cytochrome B</a>                          | Energy                         | 0.511   | 0.763   | 0.243   | 12.831   | 4.881    | 31.976   |
| <a href="#">AMK58_16240</a> | <a href="#">K07152 protein SCO1/2   (GenBank) hypothetical protein</a>                                                | energy                         | 2.242   | 2.870   | 3.350   | 74.228   | 22.142   | 70.540   |
| <a href="#">AMK58_16245</a> | <a href="#">no KO assigned   (GenBank) hypothetical protein</a>                                                       | Hypothetical                   | 13.057  | 31.913  | 23.137  | 399.104  | 175.787  | 768.277  |
| <a href="#">AMK58_16250</a> | <a href="#">no KO assigned   (GenBank) hypothetical protein</a>                                                       | Hypothetical                   | 2.640   | 6.009   | 4.304   | 90.440   | 39.853   | 192.246  |
| <a href="#">AMK58_16255</a> | <a href="#">no KO assigned   (GenBank) hypothetical protein</a>                                                       | Hypothetical                   | 1.824   | 0.000   | 5.203   | 218.080  | 20.504   | 102.967  |
| <a href="#">AMK58_16260</a> | <a href="#">no KO assigned   (GenBank) hypothetical protein</a>                                                       | Hypothetical                   | 0.897   | 0.000   | 1.919   | 130.950  | 12.349   | 65.491   |
| <a href="#">AMK58_16265</a> | <a href="#">K00185 prokaryotic molbdopterin-containing oxidoreductase family, membrane subunit   (GenBank) hvdR</a>   | Oxidoreductase                 | 0.450   | 2.691   | 1.884   | 134.431  | 13.366   | 79.524   |
| <a href="#">AMK58_16270</a> | <a href="#">K00184 prokaryotic molbdopterin-containing oxidoreductase family, iron-sulfur binding subunit   (Ge</a>   | oxidoreductase                 | 0.126   | 0.251   | 0.199   | 16.578   | 2.688    | 12.876   |
| <a href="#">AMK58_16275</a> | <a href="#">no KO assigned   (GenBank) cytochrome C</a>                                                               | Energy                         | 0.553   | 3.303   | 2.103   | 165.889  | 16.779   | 109.877  |
| <a href="#">AMK58_16280</a> | <a href="#">no KO assigned   (GenBank) hypothetical protein</a>                                                       | Hypothetical                   | 8.142   | 6.345   | 12.118  | 408.310  | 109.034  | 619.453  |
| <a href="#">AMK58_16285</a> | <a href="#">K02051 NiT/TauT family transport system substrate-binding protein   (GenBank) sulfonate ABC transpo</a>   | Transport: NiT/TauT            | 6.154   | 9.192   | 11.253  | 536.498  | 68.379   | 271.401  |
| <a href="#">AMK58_16290</a> | <a href="#">K02049 NiT/TauT family transport system ATP-binding protein   (GenBank) ABC transporter</a>               | Transport: NiT/TauT            | 0.285   | 0.000   | 3.254   | 195.043  | 37.670   | 187.248  |
| <a href="#">AMK58_16295</a> | <a href="#">K02050 NiT/TauT family transport system permease protein   (GenBank) ABC transporter permease</a>         | Transport: NiT/TauT            | 0.540   | 0.806   | 1.797   | 94.202   | 4.703    | 71.217   |
| <a href="#">AMK58_16300</a> | <a href="#">K01733 threonine synthase [EC:4.2.3.1]   (GenBank) threonine synthase</a>                                 | Metabolism                     | 4.484   | 4.659   | 3.800   | 63.464   | 27.065   | 161.535  |
| <a href="#">AMK58_16305</a> | <a href="#">K13574 uncharacterized oxidoreductase [EC:1.1.1.-1]   (GenBank) malate dehydrogenase</a>                  | Oxidoreductase                 | 2.035   | 1.351   | 3.977   | 100.704  | 18.044   | 135.856  |
| <a href="#">AMK58_16310</a> | <a href="#">K00058 D-3-phosphoglycerate dehydrogenase [EC:1.1.1.95]   (GenBank) 3-phosphoglycerate dehydrogen</a>     | Metabolism                     | 2.515   | 0.715   | 3.985   | 114.380  | 24.903   | 174.457  |
| <a href="#">AMK58_16315</a> | <a href="#">no KO assigned   (GenBank) hypothetical protein</a>                                                       | Hypothetical                   | 6.457   | 3.553   | 8.482   | 145.569  | 52.145   | 118.888  |
| <a href="#">AMK58_16320</a> | <a href="#">K01066 acetyl esterase [EC:3.1.1.-1]   (GenBank) acetyl esterase</a>                                      | Hydrolase                      | 6.809   | 8.136   | 9.417   | 274.456  | 44.669   | 123.520  |
| <a href="#">AMK58_16325</a> | <a href="#">K14228 tRNA Leu   (GenBank) tRNA-Leu</a>                                                                  | tRNA synthesis/modification    | 436.983 | 324.263 | 411.517 | 2160.614 | 376.994  | 1649.203 |
| <a href="#">AMK58_16330</a> | <a href="#">no KO assigned   (GenBank) hypothetical protein</a>                                                       | Hypothetical                   | 8.284   | 4.013   | 7.025   | 121.696  | 14.345   | 164.070  |
| <a href="#">AMK58_16335</a> | <a href="#">no KO assigned   (GenBank) hypothetical protein</a>                                                       | Hypothetical                   | 30.078  | 31.846  | 30.047  | 708.416  | 128.818  | 673.265  |
| <a href="#">AMK58_16340</a> | <a href="#">no KO assigned   (GenBank) hypothetical protein</a>                                                       | Hypothetical                   | 141.785 | 161.803 | 129.761 | 588.991  | 103.264  | 368.816  |
| <a href="#">AMK58_16345</a> | <a href="#">no KO assigned   (GenBank) hypothetical protein</a>                                                       | Hypothetical                   | 38.019  | 31.450  | 65.623  | 2573.036 | 402.362  | 755.515  |
| <a href="#">AMK58_16350</a> | <a href="#">no KO assigned   (GenBank) hypothetical protein</a>                                                       | Hypothetical                   | 5.954   | 3.953   | 18.872  | 435.154  | 44.621   | 280.367  |
| <a href="#">AMK58_16355</a> | <a href="#">no KO assigned   (GenBank) hypothetical protein</a>                                                       | Hypothetical                   | 0.777   | 1.092   | 0.608   | 10.408   | 4.007    | 16.826   |
| <a href="#">AMK58_16360</a> | <a href="#">no KO assigned   (GenBank) hypothetical protein</a>                                                       | Hypothetical                   | 41.931  | 53.234  | 37.376  | 248.545  | 37.116   | 389.785  |
| <a href="#">AMK58_16365</a> | <a href="#">no KO assigned   (GenBank) MES transporter</a>                                                            | Transport: MFS                 | 21.230  | 25.744  | 20.586  | 26.468   | 14.058   | 46.292   |
| <a href="#">AMK58_16370</a> | <a href="#">K00432 glutathione peroxidase [EC:1.11.1.9]   (GenBank) glutathione peroxidase</a>                        | Metabolism                     | 78.258  | 63.645  | 96.614  | 578.216  | 201.492  | 484.032  |
| <a href="#">AMK58_16375</a> | <a href="#">no KO assigned   (GenBank) hypothetical protein</a>                                                       | Hypothetical                   | 44.445  | 47.308  | 39.830  | 65.696   | 22.969   | 44.529   |
| <a href="#">AMK58_16380</a> | <a href="#">K05539 tRNA-dihydrouridine synthase A [EC:1.-.-.-1]   (GenBank) tRNA-dihydrouridine synthase A</a>        | tRNA synthesis/modification    | 51.365  | 35.072  | 50.466  | 268.999  | 47.151   | 226.581  |
| <a href="#">AMK58_16385</a> | <a href="#">K19337 RpiR family transcriptional regulator, carbohydrate utilization regulator   (GenBank) transcr</a>  | Transcription                  | 31.876  | 45.772  | 38.503  | 182.161  | 113.642  | 119.501  |
| <a href="#">AMK58_16390</a> | <a href="#">no KO assigned   (GenBank) C4-dicarboxylate ABC transporter permease</a>                                  | Membrane Transport             | 22.870  | 42.866  | 40.505  | 86.499   | 92.493   | 71.936   |
| <a href="#">AMK58_16395</a> | <a href="#">no KO assigned   (GenBank) L-dehydroascorbate transporter large permease subunit</a>                      | Transport                      | 14.650  | 12.988  | 15.098  | 153.323  | 64.488   | 90.885   |
| <a href="#">AMK58_16400</a> | <a href="#">no KO assigned   (GenBank) ABC transporter substrate-binding protein</a>                                  | Membrane Transport             | 5.615   | 11.182  | 12.124  | 205.279  | 52.728   | 169.110  |
| <a href="#">AMK58_16405</a> | <a href="#">no KO assigned   (GenBank) hypothetical protein</a>                                                       | Hypothetical                   | 13.611  | 7.961   | 15.204  | 126.485  | 31.883   | 70.257   |
| <a href="#">AMK58_16410</a> | <a href="#">no KO assigned   (GenBank) 2-hydroxyhepta-2,4-diene-1,7-dioate isomerase</a>                              | No COG                         | 56.416  | 55.186  | 64.045  | 262.505  | 161.651  | 214.788  |

|                             |                                                                                                                        |                                     |         |         |         |          |         |          |
|-----------------------------|------------------------------------------------------------------------------------------------------------------------|-------------------------------------|---------|---------|---------|----------|---------|----------|
| <a href="#">AMK58_16415</a> | <a href="#">no KO assigned   (GenBank) hypothetical protein</a>                                                        | Hypothetical                        | 540.748 | 553.154 | 482.045 | 314.125  | 368.549 | 373.009  |
| <a href="#">AMK58_16420</a> | <a href="#">no KO assigned   (GenBank) hypothetical protein</a>                                                        | Hypothetical                        | 241.007 | 297.986 | 278.023 | 871.622  | 542.233 | 462.142  |
| <a href="#">AMK58_16425</a> | <a href="#">K03168 DNA topoisomerase I [EC:5.99.1.2]   (GenBank) DNA topoisomerase I</a>                               | DNA Repair and Replication          | 72.603  | 69.685  | 72.969  | 58.364   | 107.782 | 49.571   |
| <a href="#">AMK58_16430</a> | <a href="#">K04096 DNA processing protein   (GenBank) DNA processing protein DprA</a>                                  | DNA Repair and Replication          | 43.596  | 47.708  | 58.791  | 36.138   | 99.826  | 49.331   |
| <a href="#">AMK58_16435</a> | <a href="#">no KO assigned   (GenBank) hypothetical protein</a>                                                        | Hypothetical                        | 9.037   | 8.589   | 14.549  | 68.368   | 116.470 | 53.040   |
| <a href="#">AMK58_16440</a> | <a href="#">no KO assigned   (GenBank) regulator</a>                                                                   | Signal transduction                 | 371.519 | 333.572 | 357.128 | 526.524  | 997.460 | 512.446  |
| <a href="#">AMK58_16445</a> | <a href="#">no KO assigned   (GenBank) hypothetical protein</a>                                                        | Hypothetical                        | 18.706  | 18.480  | 18.066  | 245.055  | 86.093  | 197.223  |
| <a href="#">AMK58_16450</a> | <a href="#">no KO assigned   (GenBank) chemotaxis protein</a>                                                          | Chemotaxis                          | 26.456  | 20.124  | 36.451  | 135.852  | 26.503  | 107.272  |
| <a href="#">AMK58_16455</a> | <a href="#">K01989 putative ABC transport system substrate-binding protein   (GenBank) ABC transporter substrate</a>   | Membrane Transport                  | 154.764 | 169.676 | 189.897 | 182.671  | 15.897  | 170.910  |
| <a href="#">AMK58_16460</a> | <a href="#">no KO assigned   (GenBank) hypothetical protein</a>                                                        | Hypothetical                        | 84.259  | 111.356 | 142.507 | 173.535  | 33.071  | 147.408  |
| <a href="#">AMK58_16465</a> | <a href="#">no KO assigned   (GenBank) hypothetical protein</a>                                                        | Hypothetical                        | 76.179  | 82.488  | 130.909 | 319.716  | 30.496  | 164.286  |
| <a href="#">AMK58_16470</a> | <a href="#">no KO assigned   (GenBank) hypothetical protein</a>                                                        | Hypothetical                        | 62.884  | 67.289  | 92.065  | 174.130  | 24.265  | 154.770  |
| <a href="#">AMK58_16475</a> | <a href="#">no KO assigned   (GenBank) hypothetical protein</a>                                                        | Hypothetical                        | 48.938  | 42.718  | 77.955  | 216.035  | 19.289  | 85.897   |
| <a href="#">AMK58_16480</a> | <a href="#">no KO assigned   (GenBank) hypothetical protein</a>                                                        | Hypothetical                        | 16.143  | 17.794  | 24.009  | 62.446   | 3.978   | 41.746   |
| <a href="#">AMK58_16485</a> | <a href="#">no KO assigned   (GenBank) two-component system response regulator</a>                                     | Signal Transduction                 | 19.372  | 28.934  | 29.624  | 164.997  | 14.880  | 114.365  |
| <a href="#">AMK58_16490</a> | <a href="#">no KO assigned   (GenBank) hypothetical protein</a>                                                        | Hypothetical                        | 400.326 | 449.578 | 549.386 | 75.095   | 19.218  | 210.735  |
| <a href="#">AMK58_16495</a> | <a href="#">no KO assigned   (GenBank) hypothetical protein</a>                                                        | Hypothetical                        | 571.586 | 518.685 | 586.303 | 2455.419 | 346.563 | 2044.352 |
| <a href="#">AMK58_16500</a> | <a href="#">no KO assigned   (GenBank) hypothetical protein</a>                                                        | Hypothetical                        | 10.939  | 11.816  | 14.221  | 105.143  | 31.748  | 94.962   |
| <a href="#">AMK58_16505</a> | <a href="#">no KO assigned   (GenBank) hypothetical protein</a>                                                        | Hypothetical                        | 372.720 | 393.591 | 749.684 | 449.986  | 146.434 | 400.373  |
| <a href="#">AMK58_16510</a> | <a href="#">no KO assigned   (GenBank) GCN5 family acetyltransferase</a>                                               | Acetyltransferase                   | 16.229  | 29.174  | 33.047  | 30.013   | 22.279  | 59.797   |
| <a href="#">AMK58_16515</a> | <a href="#">K16841 allantoin racemase [EC:5.1.99.3]   (GenBank) Asp/Glu/hydantoin racemase</a>                         | Metabolism: Nucleotide              | 64.995  | 58.101  | 85.684  | 663.942  | 167.976 | 548.874  |
| <a href="#">AMK58_16520</a> | <a href="#">K02053 putative spermidine/putrescine transport system permease protein   (GenBank) ABC transporter</a>    | Membrane Transport                  | 3.748   | 3.445   | 4.523   | 104.262  | 14.905  | 108.527  |
| <a href="#">AMK58_16525</a> | <a href="#">K02054 putative spermidine/putrescine transport system permease protein   (GenBank) ABC transporter</a>    | Membrane Transport                  | 15.724  | 21.920  | 22.301  | 198.344  | 33.876  | 125.149  |
| <a href="#">AMK58_16530</a> | <a href="#">K02055 putative spermidine/putrescine transport system substrate-binding protein   (GenBank) ABC tra</a>   | Quorum sensing                      | 0.092   | 1.648   | 1.049   | 115.882  | 10.334  | 43.305   |
| <a href="#">AMK58_16535</a> | <a href="#">K02052 putative spermidine/putrescine transport system ATP-binding protein   (GenBank) Fe3+/spermid</a>    | Quorum sensing                      | 1.068   | 1.418   | 4.289   | 86.340   | 20.814  | 137.365  |
| <a href="#">AMK58_16540</a> | <a href="#">no KO assigned   (GenBank) transcriptional regulator</a>                                                   | Transcription                       | 3.400   | 1.766   | 4.357   | 282.984  | 36.724  | 221.112  |
| <a href="#">AMK58_16545</a> | <a href="#">K01772 protoporphyrin/coprotoporphyrin ferrochelatase [EC:4.99.1.4 4.99.1.9]   (GenBank) hemF; ferroch</a> | Metabolism: Co-Factors and Vitamins | 4.237   | 4.663   | 7.738   | 184.587  | 47.495  | 208.826  |
| <a href="#">AMK58_16550</a> | <a href="#">K05845 osmoprotectant transport system substrate-binding protein   (GenBank) ABC transporter</a>           | Membrane transport                  | 0.386   | 0.768   | 3.911   | 228.472  | 19.648  | 163.756  |
| <a href="#">AMK58_16555</a> | <a href="#">K05846 osmoprotectant transport system permease protein   (GenBank) osmoprotectant uptake system per</a>   | Membrane transport                  | 1.548   | 2.467   | 3.140   | 112.548  | 15.663  | 86.140   |
| <a href="#">AMK58_16560</a> | <a href="#">K05847 osmoprotectant transport system ATP-binding protein   (GenBank) ABC transporter</a>                 | Transport                           | 112.694 | 117.093 | 120.023 | 260.403  | 54.640  | 212.463  |
| <a href="#">AMK58_16565</a> | <a href="#">K05846 osmoprotectant transport system permease protein   (GenBank) osmoprotectant uptake system per</a>   | Membrane Transport                  | 348.031 | 450.088 | 383.429 | 322.676  | 120.260 | 271.502  |
| <a href="#">AMK58_16570</a> | <a href="#">no KO assigned   (GenBank) hypothetical protein</a>                                                        | Hypothetical                        | 40.907  | 45.107  | 53.905  | 208.157  | 48.759  | 54.735   |
| <a href="#">AMK58_16575</a> | <a href="#">no KO assigned   (GenBank) hypothetical protein</a>                                                        | Hypothetical                        | 41.355  | 44.652  | 46.663  | 403.462  | 61.326  | 196.818  |
| <a href="#">AMK58_16580</a> | <a href="#">no KO assigned   (GenBank) signal protein PDZ</a>                                                          | No COG                              | 21.352  | 31.707  | 37.904  | 175.412  | 26.636  | 58.595   |
| <a href="#">AMK58_16585</a> | <a href="#">K02614 acyl-CoA thioesterase [EC:3.1.2.-1]   (GenBank) aromatic compounds catabolism protein</a>           | Metabolism: Amino Acid              | 328.752 | 318.142 | 465.272 | 167.817  | 144.284 | 410.096  |
| <a href="#">AMK58_16590</a> | <a href="#">no KO assigned   (GenBank) enoyl-CoA hydratase</a>                                                         | hydratase                           | 2.267   | 7.225   | 4.168   | 141.735  | 84.952  | 175.062  |
| <a href="#">AMK58_16595</a> | <a href="#">K00033 6-phosphogluconate dehydrogenase [EC:1.1.1.44 1.1.1.343]   (GenBank) 6-phosphogluconate deh</a>     | Metabolism                          | 37.338  | 40.103  | 44.197  | 132.963  | 232.481 | 92.508   |
| <a href="#">AMK58_16600</a> | <a href="#">K06145 LacI family transcriptional regulator, gluconate utilization system Gnt-I transcriptional rep.</a>  | Transcription                       | 22.101  | 15.788  | 20.443  | 67.577   | 80.333  | 42.324   |
| <a href="#">AMK58_16605</a> | <a href="#">K00851 gluconokinase [EC:2.7.1.12]   (GenBank) gluconokinase</a>                                           | Metabolism: Carbon                  | 100.896 | 89.109  | 90.093  | 163.361  | 134.121 | 85.219   |
| <a href="#">AMK58_16610</a> | <a href="#">K01690 phosphogluconate dehydratase [EC:4.2.1.12]   (GenBank) phosphogluconate dehydratase</a>             | Metabolism: Carbon                  | 23.235  | 27.682  | 30.711  | 91.483   | 91.257  | 60.151   |
| <a href="#">AMK58_16615</a> | <a href="#">no KO assigned   (GenBank) 2-keto-4-pentenoate hydratase</a>                                               | Metabolism: Carbon                  | 8.863   | 12.292  | 12.490  | 220.064  | 66.890  | 104.492  |
| <a href="#">AMK58_16620</a> | <a href="#">K02529 LacI family transcriptional regulator   (GenBank) LacI family transcriptional regulator</a>         | Transcription                       | 4.254   | 4.809   | 5.029   | 148.016  | 64.751  | 128.476  |
| <a href="#">AMK58_16625</a> | <a href="#">no KO assigned   (GenBank) dihydrofolate reductase</a>                                                     | No COG                              | 11.734  | 8.474   | 14.466  | 270.828  | 110.875 | 154.954  |
| <a href="#">AMK58_16630</a> | <a href="#">no KO assigned   (GenBank) glnO: glutamine ABC transporter ATP-binding protein</a>                         | Membrane Transport                  | 122.763 | 108.182 | 124.019 | 252.632  | 67.270  | 172.175  |
| <a href="#">AMK58_16635</a> | <a href="#">K02030 polar amino acid transport system substrate-binding protein   (GenBank) ABC transporter subst</a>   | Transport: Amino Acid               | 23.127  | 18.964  | 23.139  | 246.417  | 52.670  | 115.914  |
| <a href="#">AMK58_16640</a> | <a href="#">K02029 polar amino acid transport system permease protein   (GenBank) amino acid ABC transporter per</a>   | Transport: Amino Acid               | 57.283  | 38.890  | 58.532  | 167.418  | 69.405  | 77.778   |
| <a href="#">AMK58_16645</a> | <a href="#">K02029 polar amino acid transport system permease protein   (GenBank) ABC transporter permease</a>         | Transport: Amino Acid               | 237.486 | 176.820 | 220.005 | 149.932  | 133.069 | 286.080  |
| <a href="#">AMK58_16650</a> | <a href="#">K03750 molybdopterin molybdopterinase [EC:2.10.1.1]   (GenBank) molybdopterin biosynthesis protein</a>     | Metabolism: Co-Factors and Vitamins | 338.351 | 263.669 | 290.144 | 140.924  | 91.708  | 120.077  |
| <a href="#">AMK58_16655</a> | <a href="#">K09948 uncharacterized protein   (GenBank) alkaline phosphatase</a>                                        | Enzyme                              | 158.841 | 123.877 | 156.308 | 321.892  | 155.654 | 279.129  |
| <a href="#">AMK58_16660</a> | <a href="#">K09138 uncharacterized protein   (GenBank) hypothetical protein</a>                                        | Hypothetical                        | 93.909  | 64.804  | 84.644  | 41.626   | 114.674 | 103.480  |
| <a href="#">AMK58_16665</a> | <a href="#">K04085 tRNA 2-thiouridine synthesizing protein A [EC:2.8.1.-1]   (GenBank) regulator of disulfide-bon</a>  | tRNA synthesis/modification         | 658.504 | 674.521 | 778.631 | 1169.518 | 836.083 | 604.456  |
| <a href="#">AMK58_16670</a> | <a href="#">no KO assigned   (GenBank) short-chain dehydrogenase</a>                                                   | dehydrogenase                       | 125.843 | 118.822 | 101.296 | 49.232   | 92.167  | 66.326   |
| <a href="#">AMK58_16675</a> | <a href="#">K07090 uncharacterized protein   (GenBank) hypothetical protein</a>                                        | Hypothetical                        | 96.537  | 94.518  | 102.686 | 323.939  | 156.961 | 127.089  |
| <a href="#">AMK58_16680</a> | <a href="#">no KO assigned   (GenBank) ferredoxin</a>                                                                  | ferredoxin                          | 53.213  | 42.866  | 38.657  | 113.730  | 74.599  | 170.206  |
| <a href="#">AMK58_16685</a> | <a href="#">no KO assigned   (GenBank) hypothetical protein</a>                                                        | Hypothetical                        | 3.594   | 4.129   | 5.125   | 199.215  | 232.570 | 144.054  |
| <a href="#">AMK58_16690</a> | <a href="#">K01494 dCTP deaminase [EC:3.5.4.13]   (GenBank) deoxycytidine triphosphate deaminase</a>                   | Metabolism: Nucleotide              | 9.727   | 3.710   | 8.068   | 204.326  | 140.448 | 105.553  |
| <a href="#">AMK58_16695</a> | <a href="#">K03710 GntR family transcriptional regulator   (GenBank) GntR family transcriptional regulator</a>         | Transcription                       | 4.230   | 4.956   | 4.039   | 89.345   | 74.971  | 69.725   |
| <a href="#">AMK58_16700</a> | <a href="#">K01999 branched-chain amino acid transport system substrate-binding protein   (GenBank) ABC transpor</a>   | Transport: Amino Acid               | 15.463  | 10.458  | 16.551  | 122.454  | 115.980 | 141.938  |
| <a href="#">AMK58_16705</a> | <a href="#">K01997 branched-chain amino acid transport system permease protein   (GenBank) branched-chain amino</a>    | Transport: Amino Acid               | 216.770 | 229.518 | 224.568 | 106.080  | 242.099 | 187.888  |
| <a href="#">AMK58_16710</a> | <a href="#">K01998 branched-chain amino acid transport system permease protein   (GenBank) ABC transporter perme</a>   | Transport: Amino Acid               | 7.393   | 6.517   | 8.643   | 183.616  | 21.660  | 90.468   |
| <a href="#">AMK58_16715</a> | <a href="#">K01995 branched-chain amino acid transport system ATP-binding protein   (GenBank) ABC transporter A</a>    | Transport: Amino Acid               | 57.215  | 49.386  | 59.023  | 211.906  | 33.158  | 347.179  |
| <a href="#">AMK58_16720</a> | <a href="#">K01996 branched-chain amino acid transport system ATP-binding protein   (GenBank) livF: ABC transport</a>  | Transport: Amino Acid               | 18.483  | 27.354  | 24.668  | 139.925  | 17.917  | 235.074  |
| <a href="#">AMK58_16725</a> | <a href="#">no KO assigned   (GenBank) carboxyvinyl-carboxyphosphonate phosphorylmutase</a>                            | No COG                              | 8.453   | 5.702   | 9.982   | 204.559  | 9.502   | 188.128  |
| <a href="#">AMK58_16730</a> | <a href="#">K01474 N-methylhydantoinase B [EC:3.5.2.14]   (GenBank) hydantoin utilization protein B</a>                | Metabolism: Amino Acid              | 1.387   | 0.414   | 2.176   | 54.062   | 2.494   | 33.565   |
| <a href="#">AMK58_16735</a> | <a href="#">K01473 N-methylhydantoinase A [EC:3.5.2.14]   (GenBank) hydantoin utilization protein A</a>                | Metabolism: Amino Acid              | 2.714   | 2.760   | 2.525   | 77.729   | 4.608   | 75.114   |
| <a href="#">AMK58_16740</a> | <a href="#">no KO assigned   (GenBank) cysteine hydrolase</a>                                                          | hydrolase                           | 6.890   | 8.233   | 13.852  | 260.816  | 23.014  | 209.570  |
| <a href="#">AMK58_16745</a> | <a href="#">K00244 fumarate reductase flavoprotein subunit [EC:1.3.5.4]   (GenBank) 3-ketosteroid dehydrogenase</a>    | Metabolism                          | 10.728  | 9.665   | 10.767  | 189.217  | 21.247  | 191.932  |

|                             |                                                                                                                           |                                       |          |          |          |          |          |          |
|-----------------------------|---------------------------------------------------------------------------------------------------------------------------|---------------------------------------|----------|----------|----------|----------|----------|----------|
| <a href="#">AMK58_16750</a> | <a href="#">K01703 3-isopropylmalate(R)-2-methylmalate dehydratase large subunit [EC:4.2.1.33 4.2.1.35] (GenBank)</a>     | Metabolism                            | 8.003    | 8.740    | 11.700   | 308.810  | 25.245   | 122.802  |
| <a href="#">AMK58_16755</a> | <a href="#">K01704 3-isopropylmalate(R)-2-methylmalate dehydratase small subunit [EC:4.2.1.33 4.2.1.35] (GenBank)</a>     | Metabolism                            | 9.329    | 10.905   | 11.570   | 162.729  | 37.158   | 172.636  |
| <a href="#">AMK58_16760</a> | <a href="#">no KO assigned (GenBank) transcriptional regulator</a>                                                        | Transcription                         | 10.798   | 8.871    | 13.219   | 286.583  | 60.385   | 124.285  |
| <a href="#">AMK58_16765</a> | <a href="#">K14233 tRNA Ser1 (GenBank) tRNA-Ser</a>                                                                       | tRNA synthesis/modification           | 99.550   | 80.373   | 129.189  | 2524.693 | 756.073  | 1600.467 |
| <a href="#">AMK58_16770</a> | <a href="#">no KO assigned (GenBank) hypothetical protein</a>                                                             | Hypothetical                          | 9.086    | 12.624   | 14.867   | 201.812  | 59.853   | 160.861  |
| <a href="#">AMK58_16775</a> | <a href="#">K01142 exodeoxyribonuclease III [EC:3.1.11.21] (GenBank) exodeoxyribonuclease III</a>                         | DNA Repair and Replication            | 64.696   | 67.182   | 78.943   | 270.722  | 74.626   | 194.686  |
| <a href="#">AMK58_16780</a> | <a href="#">K15724 iron-sulfur cluster insertion protein (GenBank) heme biosynthesis protein HemY</a>                     | No COG                                | 40.030   | 52.928   | 50.228   | 42.195   | 42.414   | 162.167  |
| <a href="#">AMK58_16785</a> | <a href="#">K01129 dGTPase [EC:3.1.5.11] (GenBank) deoxyguanosinetriphosphate triphosphohydrolase</a>                     | Metabolism: Nucleotide                | 38.744   | 46.415   | 35.303   | 49.467   | 106.833  | 130.794  |
| <a href="#">AMK58_16790</a> | <a href="#">K01887 arginyl-tRNA synthetase [EC:6.1.1.19] (GenBank) arginine--tRNA ligase</a>                              | tRNA synthesis/modification           | 106.224  | 100.226  | 91.258   | 33.984   | 365.311  | 106.404  |
| <a href="#">AMK58_16795</a> | <a href="#">no KO assigned (GenBank) hypothetical protein</a>                                                             | Hypothetical                          | 159.730  | 185.536  | 166.698  | 121.990  | 622.435  | 133.533  |
| <a href="#">AMK58_16800</a> | <a href="#">K01207 beta-N-acetylhexosaminidase [EC:3.2.1.52] (GenBank) beta-hexosaminidase</a>                            | Defense                               | 81.164   | 92.173   | 96.942   | 244.701  | 113.223  | 279.897  |
| <a href="#">AMK58_16805</a> | <a href="#">no KO assigned (GenBank) peptidase M48</a>                                                                    | Peptidases                            | 210.453  | 231.210  | 200.626  | 369.053  | 199.065  | 309.126  |
| <a href="#">AMK58_16810</a> | <a href="#">K05896 segregation and condensation protein A (GenBank) chromosome segregation protein ScpA</a>               | Cell Cycle/Shape/Homeostasis          | 34.593   | 46.811   | 37.248   | 118.421  | 28.083   | 36.601   |
| <a href="#">AMK58_16815</a> | <a href="#">K06024 segregation and condensation protein B (GenBank) chromosome segregation and condensation protein B</a> | Cell Cycle/Shape/Homeostasis          | 40.358   | 48.906   | 48.509   | 267.505  | 44.722   | 88.615   |
| <a href="#">AMK58_16820</a> | <a href="#">K02010 iron(III) transport system ATP-binding protein [EC:3.6.3.30] (GenBank) Fe3+/spermidine/putr</a>        | Transport: Metal                      | 102.628  | 110.207  | 102.682  | 148.259  | 41.720   | 102.110  |
| <a href="#">AMK58_16825</a> | <a href="#">K03116 sec-independent protein translocase protein TatA (GenBank) preprotein translocase</a>                  | Secretion system                      | 249.150  | 241.119  | 277.617  | 649.847  | 191.641  | 444.496  |
| <a href="#">AMK58_16830</a> | <a href="#">K03117 sec-independent protein translocase protein TatB (GenBank) preprotein translocase subunit T</a>        | Secretion system                      | 69.583   | 58.201   | 72.115   | 308.526  | 54.489   | 288.632  |
| <a href="#">AMK58_16835</a> | <a href="#">K03118 sec-independent protein translocase protein TatC (GenBank) preprotein translocase subunit T</a>        | Secretion system                      | 125.291  | 154.748  | 138.171  | 270.512  | 148.450  | 179.017  |
| <a href="#">AMK58_16840</a> | <a href="#">no KO assigned (GenBank) hypothetical protein</a>                                                             | Hypothetical                          | 217.394  | 189.539  | 220.842  | 67.159   | 681.518  | 81.405   |
| <a href="#">AMK58_16845</a> | <a href="#">K01875 seryl-tRNA synthetase [EC:6.1.1.11] (GenBank) serine--tRNA ligase</a>                                  | tRNA synthesis/modification           | 235.168  | 243.404  | 220.690  | 58.290   | 883.746  | 81.054   |
| <a href="#">AMK58_16850</a> | <a href="#">K03787 5'-nucleotidase [EC:3.1.3.51] (GenBank) stationary phase survival protein SurF</a>                     | Metabolism                            | 257.149  | 191.232  | 220.534  | 103.981  | 661.694  | 247.624  |
| <a href="#">AMK58_16855</a> | <a href="#">K00573 protein-L-isoaspartate(D-aspartate) O-methyltransferase [EC:2.1.1.77] (GenBank) protein-L-i</a>        | Transferases                          | 24.807   | 23.227   | 21.827   | 170.618  | 186.036  | 386.077  |
| <a href="#">AMK58_16860</a> | <a href="#">no KO assigned (GenBank) gamma-D-glutamyl-meso-diaminopimelate peptidase</a>                                  | peptidase                             | 157.674  | 155.427  | 146.532  | 191.072  | 128.532  | 245.177  |
| <a href="#">AMK58_16865</a> | <a href="#">K06923 uncharacterized protein (GenBank) AAA family ATPase</a>                                                | enzyme                                | 150.426  | 141.636  | 139.538  | 104.910  | 141.962  | 169.320  |
| <a href="#">AMK58_16870</a> | <a href="#">no KO assigned (GenBank) hypothetical protein</a>                                                             | Hypothetical                          | 121.402  | 142.523  | 127.392  | 150.148  | 375.588  | 215.297  |
| <a href="#">AMK58_16875</a> | <a href="#">K03210 preprotein translocase subunit YajC (GenBank) preprotein translocase subunit YajC</a>                  | Secretion system                      | 279.904  | 283.898  | 287.797  | 337.451  | 443.400  | 277.354  |
| <a href="#">AMK58_16880</a> | <a href="#">K03072 preprotein translocase subunit SecD (GenBank) preprotein translocase subunit SecD</a>                  | Secretion system                      | 146.744  | 130.738  | 128.798  | 139.466  | 92.261   | 73.161   |
| <a href="#">AMK58_16885</a> | <a href="#">K03074 preprotein translocase subunit SecE (GenBank) preprotein translocase subunit SecE</a>                  | Secretion system                      | 21.702   | 23.505   | 24.375   | 221.008  | 83.168   | 110.034  |
| <a href="#">AMK58_16890</a> | <a href="#">no KO assigned (GenBank) hypothetical protein</a>                                                             | Hypothetical                          | 1235.411 | 920.460  | 978.816  | 78.519   | 726.190  | 169.890  |
| <a href="#">AMK58_16895</a> | <a href="#">K04564 superoxide dismutase, Fe-Mn family [EC:1.15.1.11] (GenBank) superoxide dismutase</a>                   | Defense                               | 733.841  | 583.698  | 686.724  | 369.067  | 595.801  | 400.169  |
| <a href="#">AMK58_16900</a> | <a href="#">no KO assigned (GenBank) phytoene dehydrogenase</a>                                                           | dehydrogenase                         | 268.008  | 190.908  | 212.588  | 98.103   | 184.883  | 151.748  |
| <a href="#">AMK58_16905</a> | <a href="#">K02291 15-cis-phytoene/all-trans-phytoene synthase [EC:2.5.1.32 2.5.1.99] (GenBank) squalene synth</a>        | Metabolism                            | 53.294   | 43.278   | 64.570   | 107.777  | 149.470  | 122.465  |
| <a href="#">AMK58_16910</a> | <a href="#">no KO assigned (GenBank) squalene synthase</a>                                                                | Enzyme                                | 2805.246 | 2851.993 | 2897.358 | 70.039   | 827.939  | 189.302  |
| <a href="#">AMK58_16915</a> | <a href="#">K02291 15-cis-phytoene/all-trans-phytoene synthase [EC:2.5.1.32 2.5.1.99] (GenBank) phytoene synth</a>        | Biosynthesis: Terpenoid               | 8.496    | 16.921   | 10.233   | 228.388  | 55.233   | 129.471  |
| <a href="#">AMK58_16920</a> | <a href="#">K03406 methyl-accepting chemotaxis protein (GenBank) chemotaxis protein</a>                                   | Chemotaxis                            | 15.666   | 20.528   | 21.208   | 80.352   | 44.382   | 48.224   |
| <a href="#">AMK58_16925</a> | <a href="#">K04094 methylenetetrahydrofolate--tRNA-(uracil-5)-methyltransferase [EC:2.1.1.74] (GenBank) tRNA</a>          | tRNA synthesis/modification           | 58.985   | 54.583   | 55.915   | 72.241   | 138.685  | 87.924   |
| <a href="#">AMK58_16930</a> | <a href="#">no KO assigned (GenBank) hypothetical protein</a>                                                             | Hypothetical                          | 29.951   | 48.527   | 43.924   | 315.191  | 73.040   | 230.423  |
| <a href="#">AMK58_16935</a> | <a href="#">no KO assigned (GenBank) hypothetical protein</a>                                                             | Hypothetical                          | 1101.720 | 1313.556 | 1093.916 | 2127.782 | 474.633  | 2159.934 |
| <a href="#">AMK58_16940</a> | <a href="#">K03701 excinuclease ABC subunit A (GenBank) ABC-ATPase UvrA</a>                                               | DNA Repair and Replication            | 32.507   | 36.510   | 37.889   | 77.597   | 60.438   | 79.136   |
| <a href="#">AMK58_16945</a> | <a href="#">K03111 single-strand DNA-binding protein (GenBank) single-stranded DNA-binding protein</a>                    | DNA Repair and Replication            | 343.649  | 362.400  | 400.504  | 162.833  | 54.600   | 256.360  |
| <a href="#">AMK58_16950</a> | <a href="#">no KO assigned (GenBank) hypothetical protein</a>                                                             | Hypothetical                          | 28.093   | 44.914   | 43.640   | 101.764  | 266.849  | 456.417  |
| <a href="#">AMK58_16955</a> | <a href="#">no KO assigned (GenBank) hypothetical protein</a>                                                             | Hypothetical                          | 1354.885 | 1452.452 | 1293.718 | 1413.334 | 3328.343 | 2166.537 |
| <a href="#">AMK58_16960</a> | <a href="#">no KO assigned (GenBank) hypothetical protein</a>                                                             | Hypothetical                          | 426.034  | 370.460  | 357.047  | 178.655  | 317.851  | 253.536  |
| <a href="#">AMK58_16965</a> | <a href="#">no KO assigned (GenBank) hypothetical protein</a>                                                             | Hypothetical                          | 346.811  | 401.480  | 474.613  | 106.055  | 1603.816 | 189.981  |
| <a href="#">AMK58_16970</a> | <a href="#">no KO assigned (GenBank) entericidin EcnAB</a>                                                                | Defense                               | 61.724   | 52.006   | 79.756   | 724.006  | 2035.171 | 529.795  |
| <a href="#">AMK58_16975</a> | <a href="#">K03327 multidrug resistance protein, MATE family (GenBank) MATE family efflux transporter</a>                 | Defense                               | 1.141    | 0.000    | 4.421    | 123.990  | 60.552   | 61.911   |
| <a href="#">AMK58_16980</a> | <a href="#">K02469 DNA gyrase subunit A [EC:5.99.1.3] (GenBank) DNA gyrase subunit A</a>                                  | DNA Repair and Replication            | 1.035    | 1.546    | 2.542    | 39.218   | 28.837   | 66.130   |
| <a href="#">AMK58_16985</a> | <a href="#">K00954 pantetheine-phosphate adenyltransferase [EC:2.7.7.3] (GenBank) phosphopantetheine adenyl</a>           | Metabolism: Co-Factors and Vitamins   | 4.411    | 1.318    | 7.129    | 71.492   | 659.891  | 141.717  |
| <a href="#">AMK58_16990</a> | <a href="#">K14229 tRNA Lys1 (GenBank) tRNA-Lys</a>                                                                       | tRNA synthesis/modification           | 1701.419 | 1846.460 | 2134.245 | 3401.635 | 1081.583 | 3069.689 |
| <a href="#">AMK58_16995</a> | <a href="#">no KO assigned (GenBank) hypothetical protein</a>                                                             | Hypothetical                          | 680.807  | 768.949  | 747.924  | 341.868  | 687.724  | 704.373  |
| <a href="#">AMK58_17000</a> | <a href="#">K07058 membrane protein (GenBank) hypothetical protein</a>                                                    | Membrane                              | 104.175  | 93.433   | 98.810   | 92.581   | 65.920   | 114.258  |
| <a href="#">AMK58_17005</a> | <a href="#">no KO assigned (GenBank) hypothetical protein</a>                                                             | Hypothetical                          | 7.544    | 6.760    | 10.400   | 14.315   | 21.057   | 40.921   |
| <a href="#">AMK58_17010</a> | <a href="#">no KO assigned (GenBank) hypothetical protein</a>                                                             | Hypothetical                          | 8.657    | 3.043    | 16.342   | 101.643  | 325.994  | 191.366  |
| <a href="#">AMK58_17015</a> | <a href="#">no KO assigned (GenBank) hypothetical protein</a>                                                             | Hypothetical                          | 6.777    | 8.390    | 10.856   | 93.484   | 196.831  | 145.560  |
| <a href="#">AMK58_17020</a> | <a href="#">K01687 dihydroxy-acid dehydratase [EC:4.2.1.91] (GenBank) dihydroxy-acid dehydratase</a>                      | Metabolism                            | 8.759    | 9.691    | 9.747    | 81.614   | 75.121   | 121.956  |
| <a href="#">AMK58_17025</a> | <a href="#">no KO assigned (GenBank) hypothetical protein</a>                                                             | Hypothetical                          | 243.002  | 200.366  | 196.459  | 462.572  | 303.175  | 481.495  |
| <a href="#">AMK58_17030</a> | <a href="#">K03665 GTPase I (GenBank) GTPase HfX</a>                                                                      | Ribosome                              | 43.061   | 63.482   | 68.238   | 270.809  | 79.728   | 288.064  |
| <a href="#">AMK58_17035</a> | <a href="#">no KO assigned (GenBank) hypothetical protein</a>                                                             | Hypothetical                          | 69.929   | 68.955   | 86.501   | 200.383  | 224.702  | 256.087  |
| <a href="#">AMK58_17040</a> | <a href="#">no KO assigned (GenBank) hypothetical protein</a>                                                             | Hypothetical                          | 5.107    | 7.873    | 10.650   | 193.520  | 363.841  | 149.235  |
| <a href="#">AMK58_17045</a> | <a href="#">no KO assigned (GenBank) phasin</a>                                                                           | No COG                                | 22.014   | 28.664   | 39.446   | 661.219  | 1186.136 | 576.265  |
| <a href="#">AMK58_17050</a> | <a href="#">K06878 tRNA-binding protein (GenBank) tRNA-binding protein</a>                                                | tRNA synthesis/modification           | 159.992  | 146.393  | 133.963  | 1332.724 | 99.640   | 632.185  |
| <a href="#">AMK58_17055</a> | <a href="#">K14441 ribosomal protein S12 methylthiotransferase [EC:2.8.4.4] (GenBank) ribosomal protein S12 me</a>        | Ribosome                              | 26.344   | 28.616   | 29.939   | 85.786   | 149.653  | 49.761   |
| <a href="#">AMK58_17060</a> | <a href="#">no KO assigned (GenBank) transcriptional regulator</a>                                                        | Transcription                         | 761.555  | 886.854  | 723.042  | 52.951   | 1466.264 | 249.915  |
| <a href="#">AMK58_17065</a> | <a href="#">K00126 formate dehydrogenase subunit delta [EC:1.2.1.21] (GenBank) formate dehydrogenase</a>                  | Metabolism                            | 404.107  | 485.368  | 320.439  | 123.570  | 113.116  | 411.655  |
| <a href="#">AMK58_17070</a> | <a href="#">K02379 FdhD protein (GenBank) formate dehydrogenase family accessory protein FdhD</a>                         | Biosynthesis: Co-Factors and Vitamins | 247.387  | 259.525  | 288.530  | 123.806  | 415.032  | 343.094  |
| <a href="#">AMK58_17075</a> | <a href="#">K00123 formate dehydrogenase major subunit [EC:1.2.1.21] (GenBank) formate dehydrogenase</a>                  | Metabolism: Carbon                    | 45.280   | 53.951   | 59.126   | 22.588   | 49.838   | 42.781   |
| <a href="#">AMK58_17080</a> | <a href="#">K00124 formate dehydrogenase iron-sulfur subunit (GenBank) formate dehydrogenase</a>                          | Metabolism: Carbon                    | 34.250   | 40.186   | 43.151   | 35.731   | 24.855   | 41.151   |

|                             |                                                                                                                       |                                       |          |          |          |          |          |          |
|-----------------------------|-----------------------------------------------------------------------------------------------------------------------|---------------------------------------|----------|----------|----------|----------|----------|----------|
| <a href="#">AMK58_17085</a> | <a href="#">K00127 formate dehydrogenase subunit gamma   (GenBank) ATP synthase subunit E</a>                         | Metabolism: Carbon                    | 234.969  | 289.934  | 274.967  | 231.173  | 87.111   | 140.968  |
| <a href="#">AMK58_17090</a> | <a href="#">no KO assigned   (GenBank) LysR family transcriptional regulator</a>                                      | Transcription                         | 1315.167 | 1380.116 | 1566.958 | 345.138  | 188.658  | 658.649  |
| <a href="#">AMK58_17095</a> | <a href="#">K07552 MFS transporter, DHA1 family, bicyclomycin/chloramphenicol resistance protein   (GenBank) Mf</a>   | Transport: MFS                        | 614.937  | 705.643  | 643.975  | 224.831  | 55.792   | 203.433  |
| <a href="#">AMK58_17100</a> | <a href="#">no KO assigned   (GenBank) histidine kinase</a>                                                           | Signal Transduction                   | 216.042  | 246.711  | 210.062  | 48.349   | 26.424   | 70.120   |
| <a href="#">AMK58_17105</a> | <a href="#">no KO assigned   (GenBank) multidrug transporter</a>                                                      | Transport                             | 32.312   | 33.802   | 32.037   | 132.039  | 93.273   | 188.632  |
| <a href="#">AMK58_17110</a> | <a href="#">no KO assigned   (GenBank) hypothetical protein</a>                                                       | Hypothetical                          | 505.036  | 519.537  | 567.326  | 403.523  | 462.165  | 444.323  |
| <a href="#">AMK58_17115</a> | <a href="#">no KO assigned   (GenBank) hypothetical protein</a>                                                       | Hypothetical                          | 122.065  | 128.695  | 151.844  | 316.080  | 152.235  | 515.889  |
| <a href="#">AMK58_17120</a> | <a href="#">K07028 uncharacterized protein   (GenBank) hypothetical protein</a>                                       | Hypothetical                          | 187.976  | 197.995  | 198.433  | 52.295   | 64.034   | 132.349  |
| <a href="#">AMK58_17125</a> | <a href="#">no KO assigned   (GenBank) universal stress protein UspA</a>                                              | stress Response                       | 776.163  | 872.699  | 741.966  | 120.470  | 137.192  | 178.958  |
| <a href="#">AMK58_17130</a> | <a href="#">no KO assigned   (GenBank) hypothetical protein</a>                                                       | Hypothetical                          | 481.516  | 656.840  | 512.081  | 327.479  | 779.016  | 567.801  |
| <a href="#">AMK58_17135</a> | <a href="#">no KO assigned   (GenBank) hypothetical protein</a>                                                       | Hypothetical                          | 323.539  | 359.668  | 365.183  | 670.368  | 317.551  | 821.128  |
| <a href="#">AMK58_17140</a> | <a href="#">K01633 dihydroneopterin aldolase / 7,8-dihydroneopterin epimerase [EC:4.1.2.25.5.1.99.81]   (GenBank)</a> | Metabolism: Co-Factors and Vitamins   | 2494.489 | 3506.637 | 3110.106 | 1347.878 | 5194.224 | 1393.900 |
| <a href="#">AMK58_17145</a> | <a href="#">K00950 2-amino-4-hydroxy-6-hydroxymethyl-dihydropteridine diphosphokinase [EC:2.7.6.31]   (GenBank)</a>   | Metabolism: Co-Factors and Vitamins   | 571.702  | 650.592  | 547.666  | 2890.875 | 8097.948 | 1181.378 |
| <a href="#">AMK58_17150</a> | <a href="#">no KO assigned   (GenBank) hypothetical protein</a>                                                       | Hypothetical                          | 1378.995 | 2331.334 | 1904.944 | 94.433   | 1944.188 | 229.156  |
| <a href="#">AMK58_17155</a> | <a href="#">K09386 uncharacterized protein   (GenBank) carbon monoxide dehydrogenase</a>                              | dehydrogenase                         | 114.171  | 113.156  | 118.148  | 134.206  | 428.972  | 198.770  |
| <a href="#">AMK58_17160</a> | <a href="#">K08738 cytochrome c   (GenBank) cytochrome C</a>                                                          | Energy                                | 274.563  | 292.380  | 287.344  | 264.350  | 362.201  | 401.637  |
| <a href="#">AMK58_17165</a> | <a href="#">K01256 aminopeptidase N [EC:3.4.11.21]   (GenBank) pepN; aminopeptidase</a>                               | Metabolism: amino acids               | 1.002    | 2.177    | 3.075    | 56.076   | 43.419   | 35.734   |
| <a href="#">AMK58_17170</a> | <a href="#">no KO assigned   (GenBank) hypothetical protein</a>                                                       | Hypothetical                          | 417.661  | 462.611  | 437.943  | 279.111  | 344.453  | 246.297  |
| <a href="#">AMK58_17175</a> | <a href="#">K13628 iron-sulfur cluster assembly protein   (GenBank) hypothetical protein</a>                          | tRNA synthesis/modification           | 768.842  | 1027.286 | 890.640  | 252.592  | 461.268  | 315.110  |
| <a href="#">AMK58_17180</a> | <a href="#">no KO assigned   (GenBank) hypothetical protein</a>                                                       | Hypothetical                          | 843.369  | 749.950  | 751.941  | 854.258  | 1494.023 | 1311.739 |
| <a href="#">AMK58_17185</a> | <a href="#">K04488 nitrogen fixation protein NifU and related proteins   (GenBank) nitrogen fixation protein Nif</a>  | Nitrogen                              | 299.065  | 375.588  | 288.781  | 195.801  | 617.654  | 403.499  |
| <a href="#">AMK58_17190</a> | <a href="#">K11717 cysteine desulfurase / selenocysteine lyase [EC:2.8.1.7.4.4.1.16]   (GenBank) cysteine desulf</a>  | Metabolism: Amino Acid                | 314.814  | 371.128  | 238.077  | 13.740   | 473.471  | 64.357   |
| <a href="#">AMK58_17195</a> | <a href="#">K09015 Fe-S cluster assembly protein SufD   (GenBank) Fe-S cluster assembly protein SufD</a>              | No COG                                | 152.058  | 194.709  | 119.194  | 36.958   | 65.738   | 69.134   |
| <a href="#">AMK58_17200</a> | <a href="#">K09013 Fe-S cluster assembly ATP-binding protein   (GenBank) sufC; Fe-S cluster assembly ATPase Suf</a>   | Transport                             | 184.265  | 317.008  | 196.604  | 42.431   | 92.355   | 127.925  |
| <a href="#">AMK58_17205</a> | <a href="#">K09014 Fe-S cluster assembly protein SufB   (GenBank) Fe-S cluster assembly protein SufB</a>              | Biosynthesis: Co-Factors and Vitamins | 355.576  | 428.277  | 319.517  | 131.667  | 208.438  | 179.043  |
| <a href="#">AMK58_17210</a> | <a href="#">no KO assigned   (GenBank) BadM/Rrf2 family transcriptional regulator</a>                                 | Transcription                         | 1675.495 | 1833.100 | 1607.137 | 302.210  | 993.227  | 590.171  |
| <a href="#">AMK58_17215</a> | <a href="#">no KO assigned   (GenBank) hypothetical protein</a>                                                       | Hypothetical                          | 1005.603 | 1094.692 | 862.083  | 56.308   | 749.657  | 161.242  |
| <a href="#">AMK58_17220</a> | <a href="#">no KO assigned   (GenBank) hypothetical protein</a>                                                       | Hypothetical                          | 4400.793 | 5094.713 | 3687.119 | 251.641  | 7377.100 | 711.580  |
| <a href="#">AMK58_17225</a> | <a href="#">no KO assigned   (GenBank) hypothetical protein</a>                                                       | Hypothetical                          | 188.777  | 317.303  | 233.363  | 125.205  | 922.360  | 134.455  |
| <a href="#">AMK58_17230</a> | <a href="#">no KO assigned   (GenBank) hypothetical protein</a>                                                       | Hypothetical                          | 30.955   | 33.806   | 43.358   | 95.862   | 414.546  | 106.020  |
| <a href="#">AMK58_17235</a> | <a href="#">no KO assigned   (GenBank) hypothetical protein</a>                                                       | Hypothetical                          | 11.755   | 9.364    | 17.696   | 71.120   | 306.980  | 124.623  |
| <a href="#">AMK58_17240</a> | <a href="#">K14981 two-component system, OmpR family, response regulator ChvI   (GenBank) response regulator</a>      | Signal transduction                   | 18.894   | 21.674   | 30.900   | 202.074  | 646.825  | 137.218  |
| <a href="#">AMK58_17245</a> | <a href="#">no KO assigned   (GenBank) histidine kinase</a>                                                           | Signal Transduction                   | 178.340  | 210.862  | 174.827  | 139.747  | 74.002   | 191.812  |
| <a href="#">AMK58_17250</a> | <a href="#">no KO assigned   (GenBank) pseudogene</a>                                                                 | Pseudogene                            | 64.169   | 89.952   | 87.082   | 48.456   | 40.552   | 71.680   |
| <a href="#">AMK58_17255</a> | <a href="#">no KO assigned   (GenBank) peptide ABC transporter ATP-binding protein</a>                                | Membrane Transport                    | 363.486  | 401.864  | 457.620  | 69.983   | 197.019  | 141.457  |
| <a href="#">AMK58_17260</a> | <a href="#">no KO assigned   (GenBank) hypothetical protein</a>                                                       | Hypothetical                          | 269.460  | 324.513  | 416.621  | 634.517  | 292.993  | 815.995  |
| <a href="#">AMK58_17265</a> | <a href="#">no KO assigned   (GenBank) hypothetical protein</a>                                                       | Hypothetical                          | 55.686   | 44.814   | 59.071   | 367.840  | 102.643  | 393.662  |
| <a href="#">AMK58_17270</a> | <a href="#">no KO assigned   (GenBank) hypothetical protein</a>                                                       | Hypothetical                          | 202.360  | 193.574  | 223.752  | 1027.939 | 535.428  | 815.932  |
| <a href="#">AMK58_17275</a> | <a href="#">K03088 RNA polymerase sigma-70 factor, ECF subfamily   (GenBank) RNA polymerase subunit sigma-7</a>       | Transcription                         | 258.753  | 286.901  | 271.525  | 145.078  | 227.109  | 113.928  |
| <a href="#">AMK58_17280</a> | <a href="#">no KO assigned   (GenBank) carboxylate-amine ligase</a>                                                   | Enzyme                                | 20.996   | 26.357   | 28.819   | 172.801  | 286.420  | 191.964  |
| <a href="#">AMK58_17285</a> | <a href="#">no KO assigned   (GenBank) ribosomal-protein-alanine acetyltransferase</a>                                | acetyltransferase                     | 110.718  | 168.400  | 151.563  | 49.342   | 2457.598 | 268.794  |
| <a href="#">AMK58_17290</a> | <a href="#">K00688 glycogen phosphorylase [EC:2.4.1.11]   (GenBank) maltodextrin phosphorylase</a>                    | Metabolism: Carbohydrates             | 2.810    | 3.473    | 3.593    | 20.638   | 430.771  | 62.941   |
| <a href="#">AMK58_17295</a> | <a href="#">K00133 aspartate-semialdehyde dehydrogenase [EC:1.2.1.111]   (GenBank) aspartate-semialdehyde dehydro</a> | Metabolism: Amino Acid                | 55.284   | 63.490   | 63.009   | 291.583  | 271.918  | 377.000  |
| <a href="#">AMK58_17300</a> | <a href="#">no KO assigned   (GenBank) hypothetical protein</a>                                                       | Hypothetical                          | 144.493  | 159.257  | 152.308  | 354.740  | 648.823  | 319.945  |
| <a href="#">AMK58_17305</a> | <a href="#">K02837 peptide chain release factor 3   (GenBank) prfC; peptide chain release factor 3</a>                | Translation                           | 578.268  | 556.012  | 565.500  | 215.138  | 377.726  | 367.180  |
| <a href="#">AMK58_17310</a> | <a href="#">no KO assigned   (GenBank) PAS domain-containing sensor histidine kinase</a>                              | Signal Transduction                   | 96.599   | 80.220   | 79.153   | 147.283  | 269.944  | 181.567  |
| <a href="#">AMK58_17315</a> | <a href="#">no KO assigned   (GenBank) regulator</a>                                                                  | Signal transduction                   | 86.058   | 83.328   | 71.667   | 62.012   | 68.714   | 318.923  |
| <a href="#">AMK58_17320</a> | <a href="#">K07160 UPF0271 protein   (GenBank) hypothetical protein</a>                                               | No COG                                | 285.457  | 263.376  | 268.758  | 332.481  | 242.002  | 485.638  |
| <a href="#">AMK58_17325</a> | <a href="#">no KO assigned   (GenBank) allophanate hydrolase</a>                                                      | hydrolase                             | 376.567  | 389.347  | 354.583  | 223.486  | 322.509  | 332.003  |
| <a href="#">AMK58_17330</a> | <a href="#">no KO assigned   (GenBank) allophanate hydrolase</a>                                                      | hydrolase                             | 276.814  | 294.145  | 259.217  | 37.462   | 83.388   | 72.517   |
| <a href="#">AMK58_17335</a> | <a href="#">no KO assigned   (GenBank) C4-dicarboxylate ABC transporter permease</a>                                  | Membrane Transport                    | 335.327  | 343.899  | 328.911  | 92.678   | 62.298   | 107.958  |
| <a href="#">AMK58_17340</a> | <a href="#">no KO assigned   (GenBank) hypothetical protein</a>                                                       | Hypothetical                          | 531.067  | 563.083  | 476.276  | 381.932  | 122.217  | 114.911  |
| <a href="#">AMK58_17345</a> | <a href="#">no KO assigned   (GenBank) C4-dicarboxylate ABC transporter substrate-binding protein</a>                 | Membrane Transport                    | 319.922  | 290.222  | 270.944  | 138.359  | 48.398   | 51.187   |
| <a href="#">AMK58_17350</a> | <a href="#">no KO assigned   (GenBank) hypothetical protein</a>                                                       | Hypothetical                          | 2397.533 | 1839.366 | 1766.889 | 150.923  | 149.009  | 253.776  |
| <a href="#">AMK58_17355</a> | <a href="#">no KO assigned   (GenBank) LysR family transcriptional regulator</a>                                      | Transcription                         | 956.529  | 672.277  | 643.853  | 53.220   | 45.647   | 56.893   |
| <a href="#">AMK58_17360</a> | <a href="#">no KO assigned   (GenBank) pseudogene</a>                                                                 | Pseudogene                            | 4934.221 | 3809.943 | 3780.545 | 162.186  | 199.883  | 195.188  |
| <a href="#">AMK58_17365</a> | <a href="#">no KO assigned   (GenBank) acriflavine resistance protein B</a>                                           | Defense                               | 64.279   | 60.222   | 64.729   | 41.442   | 18.303   | 19.520   |
| <a href="#">AMK58_17370</a> | <a href="#">no KO assigned   (GenBank) LysR family transcriptional regulator</a>                                      | Transcription                         | 29.723   | 37.471   | 31.632   | 134.424  | 52.721   | 235.412  |
| <a href="#">AMK58_17375</a> | <a href="#">K07090 uncharacterized protein   (GenBank) hypothetical protein</a>                                       | Hypothetical                          | 129.146  | 154.316  | 145.817  | 296.692  | 198.515  | 142.508  |
| <a href="#">AMK58_17380</a> | <a href="#">no KO assigned   (GenBank) nodulation protein NoIG</a>                                                    | No COG                                | 116.150  | 107.113  | 117.606  | 143.942  | 73.863   | 177.234  |
| <a href="#">AMK58_17385</a> | <a href="#">no KO assigned   (GenBank) RND transporter</a>                                                            | transport                             | 16.998   | 13.707   | 20.823   | 179.368  | 40.441   | 142.344  |
| <a href="#">AMK58_17390</a> | <a href="#">no KO assigned   (GenBank) hypothetical protein</a>                                                       | Hypothetical                          | 4.036    | 14.248   | 8.896    | 213.299  | 35.879   | 116.692  |
| <a href="#">AMK58_17395</a> | <a href="#">no KO assigned   (GenBank) transglycosylase</a>                                                           | transglycosylase                      | 83.855   | 77.694   | 96.039   | 552.934  | 167.218  | 532.137  |
| <a href="#">AMK58_17400</a> | <a href="#">K03406 methyl-accepting chemotaxis protein   (GenBank) hypothetical protein</a>                           | Chemotaxis                            | 9.051    | 13.704   | 12.260   | 117.093  | 32.194   | 56.394   |
| <a href="#">AMK58_17405</a> | <a href="#">no KO assigned   (GenBank) methyltransferase type 11</a>                                                  | methyltransferase                     | 22.014   | 18.267   | 28.954   | 136.629  | 75.882   | 152.868  |
| <a href="#">AMK58_17410</a> | <a href="#">K03168 DNA topoisomerase I [EC:5.99.1.21]   (GenBank) DNA topoisomerase I</a>                             | DNA Repair and Replication            | 65.039   | 79.740   | 77.149   | 160.199  | 54.533   | 160.792  |
| <a href="#">AMK58_17415</a> | <a href="#">no KO assigned   (GenBank) hypothetical protein</a>                                                       | Hypothetical                          | 296.478  | 187.794  | 262.707  | 1152.975 | 490.721  | 882.324  |

|                             |                                                                                                                       |                                       |          |          |          |         |          |          |
|-----------------------------|-----------------------------------------------------------------------------------------------------------------------|---------------------------------------|----------|----------|----------|---------|----------|----------|
| <a href="#">AMK58_17420</a> | <a href="#">K01187 alpha-glucosidase [EC:3.2.1.20]   (GenBank) alpha-glucosidase</a>                                  | Metabolism: Carbohydrate              | 9.308    | 8.452    | 8.142    | 150.316 | 41.096   | 47.228   |
| <a href="#">AMK58_17425</a> | <a href="#">no KO assigned   (GenBank) ABC transporter substrate-binding protein</a>                                  | Membrane Transport                    | 1.750    | 1.960    | 4.264    | 214.197 | 103.146  | 138.943  |
| <a href="#">AMK58_17430</a> | <a href="#">K00799 glutathione S-transferase [EC:2.5.1.18]   (GenBank) glutathione S-transferase</a>                  | Metabolism: Amino Acid                | 50.969   | 54.337   | 52.245   | 110.154 | 87.534   | 97.863   |
| <a href="#">AMK58_17435</a> | <a href="#">K13893 microcin C transport system substrate-binding protein   (GenBank) hypothetical protein</a>         | Transport                             | 25.911   | 28.903   | 30.560   | 203.287 | 75.309   | 156.944  |
| <a href="#">AMK58_17440</a> | <a href="#">K11443 two-component system, cell cycle response regulator DivK   (GenBank) cell division protein</a>     | Cell Cycle/Shape/Homeostasis          | 6644.764 | 6099.406 | 5915.976 | 180.607 | 1341.778 | 495.373  |
| <a href="#">AMK58_17445</a> | <a href="#">no KO assigned   (GenBank) hypothetical protein</a>                                                       | Hypothetical                          | 498.197  | 411.977  | 436.080  | 224.840 | 115.664  | 223.300  |
| <a href="#">AMK58_17450</a> | <a href="#">K00641 homoserine O-acetyltransferase [EC:2.3.1.31]   (GenBank) homoserine acetyltransferase</a>          | Metabolism: Amino Acid                | 150.812  | 158.328  | 140.124  | 175.058 | 370.646  | 331.557  |
| <a href="#">AMK58_17455</a> | <a href="#">no KO assigned   (GenBank) hypothetical protein</a>                                                       | Hypothetical                          | 88.260   | 90.138   | 78.539   | 79.830  | 109.807  | 316.524  |
| <a href="#">AMK58_17460</a> | <a href="#">no KO assigned   (GenBank) hypothetical protein</a>                                                       | Hypothetical                          | 37.312   | 47.769   | 41.812   | 82.878  | 79.602   | 217.831  |
| <a href="#">AMK58_17465</a> | <a href="#">no KO assigned   (GenBank) hypothetical protein</a>                                                       | Hypothetical                          | 50.482   | 55.580   | 71.673   | 139.462 | 289.871  | 290.633  |
| <a href="#">AMK58_17470</a> | <a href="#">no KO assigned   (GenBank) hypothetical protein</a>                                                       | Hypothetical                          | 13.353   | 13.445   | 15.406   | 63.508  | 76.226   | 58.987   |
| <a href="#">AMK58_17475</a> | <a href="#">no KO assigned   (GenBank) hypothetical protein</a>                                                       | Hypothetical                          | 26.442   | 38.801   | 41.460   | 648.122 | 133.486  | 447.788  |
| <a href="#">AMK58_17480</a> | <a href="#">no KO assigned   (GenBank) hypothetical protein</a>                                                       | Hypothetical                          | 9.807    | 18.028   | 13.269   | 408.244 | 3126.328 | 541.413  |
| <a href="#">AMK58_17485</a> | <a href="#">no KO assigned   (GenBank) threonine transporter</a>                                                      | Transport                             | 8.186    | 9.099    | 13.213   | 190.237 | 1056.434 | 329.042  |
| <a href="#">AMK58_17490</a> | <a href="#">no KO assigned   (GenBank) hypothetical protein</a>                                                       | Hypothetical                          | 1.527    | 0.652    | 1.971    | 68.819  | 167.726  | 40.458   |
| <a href="#">AMK58_17495</a> | <a href="#">K06959 protein Tex   (GenBank) RNA-binding transcriptional accessory protein</a>                          | Transcription                         | 2.299    | 4.578    | 3.546    | 28.263  | 106.463  | 36.334   |
| <a href="#">AMK58_17500</a> | <a href="#">no KO assigned   (GenBank) oxidoreductase</a>                                                             | Oxidoreductase                        | 14.584   | 18.137   | 17.206   | 75.272  | 158.307  | 91.681   |
| <a href="#">AMK58_17505</a> | <a href="#">no KO assigned   (GenBank) formate hydrogenlyase</a>                                                      | Enzyme                                | 129.516  | 137.895  | 149.730  | 145.049 | 274.558  | 244.352  |
| <a href="#">AMK58_17510</a> | <a href="#">K12140 hydrogenase-4 component E [EC:1.-.-.1]   (GenBank) hydrogenase-4 component E</a>                   | hydrogenase                           | 256.942  | 209.479  | 253.505  | 500.501 | 338.693  | 594.538  |
| <a href="#">AMK58_17515</a> | <a href="#">K12141 hydrogenase-4 component F [EC:1.-.-.1]   (GenBank) hydrogenase 4 subunit F</a>                     | hydrogenase                           | 210.012  | 198.948  | 234.896  | 259.965 | 48.538   | 168.790  |
| <a href="#">AMK58_17520</a> | <a href="#">no KO assigned   (GenBank) hydrogenase expression protein HvpE</a>                                        | enzyme                                | 31.407   | 28.146   | 40.389   | 136.102 | 22.241   | 95.742   |
| <a href="#">AMK58_17525</a> | <a href="#">no KO assigned   (GenBank) hydrogenase</a>                                                                | hydrogenase                           | 73.526   | 90.073   | 82.259   | 149.447 | 45.364   | 225.400  |
| <a href="#">AMK58_17530</a> | <a href="#">K04765 nucleoside triphosphate diphosphatase [EC:3.6.1.9]   (GenBank) nucleoside triphosphate hydrol</a>  | Metabolism                            | 122.271  | 125.917  | 155.482  | 300.344 | 72.415   | 293.703  |
| <a href="#">AMK58_17535</a> | <a href="#">no KO assigned   (GenBank) hypothetical protein</a>                                                       | Hypothetical                          | 90.806   | 94.725   | 166.648  | 667.665 | 237.191  | 391.073  |
| <a href="#">AMK58_17540</a> | <a href="#">no KO assigned   (GenBank) hypothetical protein</a>                                                       | Hypothetical                          | 54.072   | 86.615   | 93.138   | 317.024 | 111.869  | 182.393  |
| <a href="#">AMK58_17545</a> | <a href="#">no KO assigned   (GenBank) inositol-1-monophosphatase</a>                                                 | No COG                                | 69.100   | 48.046   | 61.029   | 138.048 | 123.204  | 145.688  |
| <a href="#">AMK58_17550</a> | <a href="#">no KO assigned   (GenBank) hypothetical protein</a>                                                       | Hypothetical                          | 9.983    | 6.345    | 10.300   | 75.402  | 240.670  | 242.266  |
| <a href="#">AMK58_17555</a> | <a href="#">no KO assigned   (GenBank) hypothetical protein</a>                                                       | Hypothetical                          | 39.933   | 45.686   | 55.742   | 233.889 | 164.267  | 205.237  |
| <a href="#">AMK58_17560</a> | <a href="#">K03665 GTPase   (GenBank) GTPase HfX</a>                                                                  | Ribosome                              | 80.717   | 73.099   | 79.785   | 119.254 | 121.827  | 116.926  |
| <a href="#">AMK58_17565</a> | <a href="#">K03666 host factor-I protein   (GenBank) RNA-binding protein hfa</a>                                      | Quorum sensing                        | 113.295  | 159.777  | 137.773  | 546.482 | 265.081  | 315.167  |
| <a href="#">AMK58_17570</a> | <a href="#">K01091 phosphoglycolate phosphatase [EC:3.1.3.18]   (GenBank) HAD family hydrolase</a>                    | Metabolism                            | 262.415  | 454.296  | 311.101  | 102.323 | 440.794  | 186.956  |
| <a href="#">AMK58_17575</a> | <a href="#">K00824 D-alanine transaminase [EC:2.6.1.21]   (GenBank) D-amino acid aminotransferase</a>                 | Metabolism: Amino Acid                | 420.819  | 418.609  | 398.519  | 174.575 | 660.147  | 379.560  |
| <a href="#">AMK58_17580</a> | <a href="#">K03499 trk system potassium uptake protein   (GenBank) potassium transporter TrkA</a>                     | Transport: Inorganic                  | 450.711  | 379.276  | 342.431  | 17.785  | 711.302  | 120.586  |
| <a href="#">AMK58_17585</a> | <a href="#">no KO assigned   (GenBank) hypothetical protein</a>                                                       | Hypothetical                          | 463.532  | 404.985  | 420.240  | 273.459 | 191.147  | 448.715  |
| <a href="#">AMK58_17590</a> | <a href="#">K13599 two-component system, NtrC family, nitrogen regulation response regulator NtrX   (GenBank) AA</a>  | Nitrogen                              | 146.223  | 168.835  | 165.817  | 100.252 | 95.586   | 121.165  |
| <a href="#">AMK58_17595</a> | <a href="#">K13598 two-component system, NtrC family, nitrogen regulation sensor histidine kinase NtrY [EC:2.7.1</a>  | Nitrogen                              | 89.320   | 88.472   | 99.552   | 50.779  | 79.561   | 123.197  |
| <a href="#">AMK58_17600</a> | <a href="#">K07712 two-component system, NtrC family, nitrogen regulation response regulator GlnG   (GenBank) ni</a>  | Nitrogen                              | 20.430   | 16.508   | 21.575   | 8.749   | 10.447   | 66.539   |
| <a href="#">AMK58_17605</a> | <a href="#">K07708 two-component system, NtrC family, nitrogen regulation sensor histidine kinase GlnL [EC:2.7.1</a>  | Nitrogen                              | 181.260  | 199.028  | 200.286  | 160.568 | 82.470   | 153.239  |
| <a href="#">AMK58_17610</a> | <a href="#">K05540 tRNA-dihydrouridine svnthease B [EC:1.-.-.1]   (GenBank) tRNA-dihydrouridine svnthease</a>         | tRNA synthesis/modification           | 468.843  | 447.059  | 512.262  | 441.533 | 241.300  | 472.852  |
| <a href="#">AMK58_17615</a> | <a href="#">no KO assigned   (GenBank) hypothetical protein</a>                                                       | Hypothetical                          | 139.473  | 120.559  | 135.011  | 126.211 | 78.053   | 351.255  |
| <a href="#">AMK58_17620</a> | <a href="#">K12506 2-C-methyl-D-erythritol 4-phosphate cytidyllyltransferase / 2-C-methyl-D-erythritol 2,4-cyclod</a> | Metabolism: terpenoids and polyketide | 144.241  | 133.398  | 128.674  | 100.962 | 66.338   | 233.968  |
| <a href="#">AMK58_17625</a> | <a href="#">K03743 nicotinamide-nucleotide amidase [EC:3.5.1.42]   (GenBank) damage-inducible protein ClnA</a>        | Metabolism: Co-Factors and Vitamins   | 209.959  | 200.932  | 226.812  | 225.580 | 292.168  | 393.167  |
| <a href="#">AMK58_17630</a> | <a href="#">K18588 coenzyme Q-binding protein COO10   (GenBank) cvclase</a>                                           | No COG                                | 138.667  | 146.835  | 150.048  | 309.124 | 249.213  | 290.750  |
| <a href="#">AMK58_17635</a> | <a href="#">K03644 lipoyl synthase [EC:2.8.1.8]   (GenBank) lipoyl synthase</a>                                       | Metabolism: Co-Factors and Vitamins   | 44.533   | 55.933   | 56.176   | 248.278 | 193.403  | 170.223  |
| <a href="#">AMK58_17640</a> | <a href="#">K00382 dihydroliipoamide dehydrogenase [EC:1.8.1.4]   (GenBank) dihydroliipoamide dehydrogenase</a>       | Metabolism                            | 35.508   | 37.254   | 37.550   | 50.930  | 74.764   | 51.075   |
| <a href="#">AMK58_17645</a> | <a href="#">K00627 pyruvate dehydrogenase E2 component (dihydroliipoamide acetyltransferase) [EC:2.3.1.12]   (Gen</a> | Metabolism: Carbohydrate              | 64.916   | 77.676   | 71.681   | 44.145  | 225.401  | 68.651   |
| <a href="#">AMK58_17650</a> | <a href="#">K00162 pyruvate dehydrogenase E1 component beta subunit [EC:1.2.4.1]   (GenBank) pyruvate dehydroge</a>   | Metabolism: Carbohydrate              | 251.936  | 233.357  | 253.130  | 89.446  | 350.649  | 170.332  |
| <a href="#">AMK58_17655</a> | <a href="#">K00161 pyruvate dehydrogenase E1 component alpha subunit [EC:1.2.4.1]   (GenBank) pyruvate dehydrog</a>   | Metabolism: Carbon                    | 1587.544 | 1529.218 | 1764.591 | 129.653 | 287.709  | 304.905  |
| <a href="#">AMK58_17660</a> | <a href="#">no KO assigned   (GenBank) septation ring formation regulator EzrA</a>                                    | Cell Cycle/Shape/Homeostasis          | 4828.990 | 3865.277 | 4696.774 | 295.134 | 724.442  | 457.480  |
| <a href="#">AMK58_17665</a> | <a href="#">K10806 acyl-CoA thioesterase YciA [EC:3.1.2.-1]   (GenBank) acyl-CoA thioesterase</a>                     | Lipid metabolism                      | 4852.863 | 4024.424 | 5011.953 | 400.603 | 865.187  | 585.848  |
| <a href="#">AMK58_17670</a> | <a href="#">K02622 topoisomerase IV subunit B [EC:5.99.1.-1]   (GenBank) DNA topoisomerase IV subunit B</a>           | DNA Repair and Replication            | 1286.716 | 1150.677 | 1233.897 | 48.843  | 243.654  | 113.342  |
| <a href="#">AMK58_17675</a> | <a href="#">no KO assigned   (GenBank) hypothetical protein</a>                                                       | Hypothetical                          | 134.745  | 168.524  | 145.652  | 48.540  | 71.217   | 126.354  |
| <a href="#">AMK58_17680</a> | <a href="#">no KO assigned   (GenBank) alpha/beta hydrolase</a>                                                       | hydrolase                             | 20.265   | 25.651   | 25.636   | 89.720  | 76.058   | 112.270  |
| <a href="#">AMK58_17685</a> | <a href="#">no KO assigned   (GenBank) isochorismatase</a>                                                            | Enzyme                                | 342.042  | 400.976  | 336.029  | 632.316 | 475.449  | 831.788  |
| <a href="#">AMK58_17690</a> | <a href="#">no KO assigned   (GenBank) DNA helicase</a>                                                               | DNA Repair and Replication            | 31.218   | 30.545   | 36.458   | 78.966  | 41.794   | 81.167   |
| <a href="#">AMK58_17695</a> | <a href="#">no KO assigned   (GenBank) AsnC family transcriptional regulator</a>                                      | Transcription                         | 284.999  | 389.957  | 367.149  | 559.308 | 272.746  | 461.091  |
| <a href="#">AMK58_17700</a> | <a href="#">K04744 LPS-assembly protein   (GenBank) organic solvent tolerance protein</a>                             | Transport                             | 28.849   | 34.832   | 30.918   | 49.215  | 21.637   | 67.669   |
| <a href="#">AMK58_17705</a> | <a href="#">no KO assigned   (GenBank) hypothetical protein</a>                                                       | Hypothetical                          | 1375.350 | 1304.232 | 1272.492 | 173.802 | 1242.460 | 363.253  |
| <a href="#">AMK58_17710</a> | <a href="#">no KO assigned   (GenBank) hypothetical protein</a>                                                       | Hypothetical                          | 54.854   | 46.355   | 50.897   | 8.460   | 77.545   | 24.930   |
| <a href="#">AMK58_17715</a> | <a href="#">K09978 uncharacterized protein   (GenBank) hypothetical protein</a>                                       | Hypothetical                          | 1097.240 | 964.474  | 948.361  | 861.612 | 335.373  | 1473.874 |
| <a href="#">AMK58_17720</a> | <a href="#">no KO assigned   (GenBank) hypothetical protein</a>                                                       | Hypothetical                          | 289.630  | 232.608  | 241.975  | 331.368 | 193.199  | 620.345  |
| <a href="#">AMK58_17725</a> | <a href="#">no KO assigned   (GenBank) hypothetical protein</a>                                                       | Hypothetical                          | 14.660   | 20.608   | 22.302   | 340.198 | 35.962   | 170.564  |
| <a href="#">AMK58_17730</a> | <a href="#">no KO assigned   (GenBank) peptidylprolyl isomerase</a>                                                   | No COG                                | 39.441   | 52.060   | 41.861   | 122.254 | 16.238   | 40.825   |
| <a href="#">AMK58_17735</a> | <a href="#">no KO assigned   (GenBank) hypothetical protein</a>                                                       | Hypothetical                          | 13.925   | 15.820   | 13.283   | 6.054   | 2.976    | 11.134   |
| <a href="#">AMK58_17740</a> | <a href="#">K01785 aldose 1-epimerase [EC:5.1.3.3]   (GenBank) hypothetical protein</a>                               | Metabolism: Carbohydrate              | 28.808   | 30.850   | 33.334   | 261.573 | 42.157   | 152.591  |
| <a href="#">AMK58_17745</a> | <a href="#">no KO assigned   (GenBank) hypothetical protein</a>                                                       | Hypothetical                          | 1257.683 | 925.181  | 920.809  | 83.496  | 166.504  | 180.879  |
| <a href="#">AMK58_17750</a> | <a href="#">no KO assigned   (GenBank) hypothetical protein</a>                                                       | Hypothetical                          | 69.223   | 72.570   | 87.302   | 518.575 | 93.078   | 480.689  |



|                             |                                                                                                                       |                                     |          |          |          |          |          |          |
|-----------------------------|-----------------------------------------------------------------------------------------------------------------------|-------------------------------------|----------|----------|----------|----------|----------|----------|
| <a href="#">AMK58_17755</a> | <a href="#">no KO assigned   (GenBank) IMP dehydrogenase</a>                                                          | dehydrogenase                       | 15.193   | 17.981   | 15.377   | 66.788   | 24.700   | 54.908   |
| <a href="#">AMK58_17760</a> | <a href="#">no KO assigned   (GenBank) hypothetical protein</a>                                                       | Hypothetical                        | 11.249   | 15.590   | 15.051   | 93.055   | 16.816   | 53.178   |
| <a href="#">AMK58_17765</a> | <a href="#">no KO assigned   (GenBank) hypothetical protein</a>                                                       | Hypothetical                        | 19.774   | 23.059   | 21.701   | 44.041   | 17.353   | 67.203   |
| <a href="#">AMK58_17770</a> | <a href="#">no KO assigned   (GenBank) transglutaminase</a>                                                           | Enzyme                              | 381.802  | 378.901  | 399.810  | 590.734  | 123.996  | 634.175  |
| <a href="#">AMK58_17775</a> | <a href="#">K18138 multidrug efflux pump   (GenBank) multidrug transporter AcrB</a>                                   | Defense                             | 14.616   | 18.993   | 19.316   | 67.928   | 24.098   | 157.781  |
| <a href="#">AMK58_17780</a> | <a href="#">K03585 membrane fusion protein, multidrug efflux system   (GenBank) hemolysin D</a>                       | Defense                             | 172.750  | 195.829  | 194.707  | 388.016  | 68.287   | 296.020  |
| <a href="#">AMK58_17785</a> | <a href="#">no KO assigned   (GenBank) hypothetical protein</a>                                                       | Hypothetical                        | 37.242   | 53.188   | 40.207   | 242.683  | 21.014   | 174.183  |
| <a href="#">AMK58_17790</a> | <a href="#">no KO assigned   (GenBank) glycosyl transferase</a>                                                       | Glycosyl Transferase                | 429.598  | 427.628  | 408.599  | 536.852  | 275.348  | 726.558  |
| <a href="#">AMK58_17795</a> | <a href="#">K01358 ATP-dependent Clp protease, protease subunit [EC:3.4.21.92]   (GenBank) ATP-dependent Clp pr</a>   | Peptidase                           | 205.192  | 216.736  | 234.981  | 567.347  | 117.998  | 377.596  |
| <a href="#">AMK58_17800</a> | <a href="#">no KO assigned   (GenBank) hypothetical protein</a>                                                       | Hypothetical                        | 76.169   | 88.297   | 75.125   | 845.955  | 229.378  | 708.933  |
| <a href="#">AMK58_17805</a> | <a href="#">no KO assigned   (GenBank) hypothetical protein</a>                                                       | Hypothetical                        | 31.493   | 40.419   | 32.162   | 225.935  | 60.049   | 153.587  |
| <a href="#">AMK58_17810</a> | <a href="#">no KO assigned   (GenBank) hypothetical protein</a>                                                       | Hypothetical                        | 377.834  | 350.104  | 313.430  | 24.004   | 672.119  | 121.551  |
| <a href="#">AMK58_17815</a> | <a href="#">K08990 putative membrane protein   (GenBank) hypothetical protein</a>                                     | Membrane                            | 110.491  | 125.771  | 123.634  | 13.554   | 93.474   | 54.463   |
| <a href="#">AMK58_17820</a> | <a href="#">K06918 uncharacterized protein   (GenBank) hypothetical protein</a>                                       | Hypothetical                        | 622.304  | 943.529  | 761.687  | 72.961   | 211.252  | 105.610  |
| <a href="#">AMK58_17825</a> | <a href="#">K03595 GTPase   (GenBank) GTPase Era</a>                                                                  | Ribosome                            | 70.159   | 85.429   | 83.734   | 301.458  | 199.333  | 173.733  |
| <a href="#">AMK58_17830</a> | <a href="#">K03685 ribonuclease III [EC:3.1.26.3]   (GenBank) ribonuclease</a>                                        | Genetic Information Processing      | 15.498   | 19.289   | 24.405   | 180.134  | 91.636   | 86.073   |
| <a href="#">AMK58_17835</a> | <a href="#">K03100 signal peptidase I [EC:3.4.21.89]   (GenBank) S26 family signal peptidase</a>                      | Quorum sensing                      | 82.287   | 74.118   | 85.107   | 356.346  | 536.400  | 283.951  |
| <a href="#">AMK58_17840</a> | <a href="#">K00997 holo-[acyl-carrier protein] synthase [EC:2.7.8.71]   (GenBank) 4'-phosphopantetheinyl transfer</a> | Metabolism: Co-Factors and Vitamins | 246.132  | 250.636  | 245.385  | 232.253  | 327.400  | 490.934  |
| <a href="#">AMK58_17845</a> | <a href="#">K03474 pyridoxine 5-phosphate synthase [EC:2.6.99.2]   (GenBank) pyridoxine 5'-phosphate synthase</a>     | Metabolism: Co-Factors and Vitamins | 55.955   | 65.323   | 59.318   | 178.340  | 82.596   | 188.160  |
| <a href="#">AMK58_17850</a> | <a href="#">K02503 histidine triad (HIT) family protein   (GenBank) histidine triad (HIT) protein</a>                 | No COG                              | 329.163  | 241.119  | 259.086  | 126.911  | 327.525  | 338.667  |
| <a href="#">AMK58_17855</a> | <a href="#">K00951 GTP pyrophosphokinase [EC:2.7.6.5]   (GenBank) GTP pyrophosphokinase</a>                           | Metabolism: Nucleotide              | 11.985   | 7.327    | 10.865   | 47.790   | 31.392   | 25.121   |
| <a href="#">AMK58_17860</a> | <a href="#">K03060 DNA-directed RNA polymerase subunit omega [EC:2.7.7.6]   (GenBank) DNA-directed RNA po</a>         | Transcription                       | 113.220  | 105.186  | 102.500  | 245.274  | 275.535  | 149.442  |
| <a href="#">AMK58_17865</a> | <a href="#">no KO assigned   (GenBank) hypothetical protein</a>                                                       | Hypothetical                        | 37.030   | 55.930   | 47.274   | 63.537   | 120.192  | 166.668  |
| <a href="#">AMK58_17870</a> | <a href="#">no KO assigned   (GenBank) hypothetical protein</a>                                                       | Hypothetical                        | 228.657  | 244.654  | 229.563  | 151.564  | 731.684  | 416.045  |
| <a href="#">AMK58_17875</a> | <a href="#">no KO assigned   (GenBank) histidine kinase</a>                                                           | Signal Transduction                 | 412.143  | 668.034  | 425.425  | 79.104   | 1015.298 | 211.903  |
| <a href="#">AMK58_17880</a> | <a href="#">no KO assigned   (GenBank) nitrogenase accessory factor</a>                                               | Nitrogen                            | 1619.712 | 1575.308 | 1669.651 | 211.442  | 1072.280 | 307.148  |
| <a href="#">AMK58_17885</a> | <a href="#">no KO assigned   (GenBank) transcriptional regulator</a>                                                  | Transcription                       | 95.681   | 98.886   | 123.742  | 363.248  | 234.723  | 323.774  |
| <a href="#">AMK58_17890</a> | <a href="#">K09945 uncharacterized protein   (GenBank) hypothetical protein</a>                                       | Hypothetical                        | 131.818  | 158.722  | 185.515  | 83.232   | 246.241  | 184.155  |
| <a href="#">AMK58_17895</a> | <a href="#">K01338 ATP-dependent Lon protease [EC:3.4.21.53]   (GenBank) DNA-binding protein</a>                      | Peptidase                           | 18.321   | 18.500   | 22.621   | 37.539   | 32.602   | 46.468   |
| <a href="#">AMK58_17900</a> | <a href="#">no KO assigned   (GenBank) heat-shock protein Hsp20</a>                                                   | Stress Response                     | 104.160  | 92.192   | 116.248  | 217.043  | 158.775  | 327.728  |
| <a href="#">AMK58_17905</a> | <a href="#">no KO assigned   (GenBank) hypothetical protein</a>                                                       | Hypothetical                        | 353.135  | 293.863  | 290.196  | 534.707  | 1573.578 | 476.561  |
| <a href="#">AMK58_17910</a> | <a href="#">no KO assigned   (GenBank) hypothetical protein</a>                                                       | Hypothetical                        | 56.213   | 60.280   | 106.896  | 1829.740 | 1123.849 | 1411.390 |
| <a href="#">AMK58_17915</a> | <a href="#">no KO assigned   (GenBank) universal stress protein UspA</a>                                              | stress Response                     | 1.901    | 6.989    | 5.005    | 164.928  | 72.978   | 56.542   |
| <a href="#">AMK58_17920</a> | <a href="#">K12686 outer membrane lipase/esterase   (GenBank) hypothetical protein</a>                                | Secretion system                    | 1.004    | 1.599    | 2.864    | 30.393   | 20.011   | 28.300   |
| <a href="#">AMK58_17925</a> | <a href="#">K12262 cytochrome b561   (GenBank) hypothetical protein</a>                                               | Energy                              | 124.851  | 114.214  | 140.252  | 153.334  | 37.140   | 94.762   |
| <a href="#">AMK58_17930</a> | <a href="#">K07315 phosphoserine phosphatase RsbU/P [EC:3.1.3.31]   (GenBank) protein phosphatase</a>                 | Transcription                       | 203.018  | 186.519  | 257.414  | 95.142   | 27.026   | 79.908   |
| <a href="#">AMK58_17935</a> | <a href="#">K03799 heat shock protein HtpX [EC:3.4.24.-]   (GenBank) peptidase M48</a>                                | Stress response                     | 4.867    | 7.092    | 10.835   | 327.552  | 119.148  | 263.944  |
| <a href="#">AMK58_17940</a> | <a href="#">no KO assigned   (GenBank) molecular chaperone DnaJ</a>                                                   | Chaperone                           | 9.723    | 9.549    | 13.044   | 95.813   | 87.285   | 124.250  |
| <a href="#">AMK58_17945</a> | <a href="#">K18997 chaperone modulatory protein CbpM   (GenBank) hypothetical protein</a>                             | Chaperone                           | 215.900  | 180.349  | 239.285  | 739.286  | 642.478  | 526.055  |
| <a href="#">AMK58_17950</a> | <a href="#">no KO assigned   (GenBank) hypothetical protein</a>                                                       | Hypothetical                        | 99.004   | 90.419   | 149.894  | 1005.215 | 1663.598 | 848.455  |
| <a href="#">AMK58_17955</a> | <a href="#">K00384 thioredoxin reductase (NADPH) [EC:1.8.1.9]   (GenBank) pyridine nucleotide-disulfide oxidore</a>   | Energy                              | 25.517   | 31.890   | 37.878   | 224.968  | 1129.574 | 249.891  |
| <a href="#">AMK58_17960</a> | <a href="#">no KO assigned   (GenBank) hypothetical protein</a>                                                       | Hypothetical                        | 41.290   | 42.659   | 53.132   | 168.424  | 845.174  | 202.949  |
| <a href="#">AMK58_17965</a> | <a href="#">K03413 two-component system, chemotaxis family, response regulator CheY   (GenBank) hypothetical pro</a>  | Chemotaxis                          | 74.951   | 88.027   | 78.573   | 214.532  | 374.436  | 163.058  |
| <a href="#">AMK58_17970</a> | <a href="#">no KO assigned   (GenBank) hypothetical protein</a>                                                       | Hypothetical                        | 12.076   | 15.189   | 18.431   | 484.855  | 548.659  | 528.345  |
| <a href="#">AMK58_17975</a> | <a href="#">K07393 putative glutathione S-transferase   (GenBank) glutathionyl-hydroquinone reductase YqjG</a>        | No COG                              | 0.639    | 0.000    | 0.850    | 35.243   | 22.826   | 40.502   |
| <a href="#">AMK58_17980</a> | <a href="#">K03809 NAD(P)H dehydrogenase (quinone) [EC:1.6.5.2]   (GenBank) NAD(P)H-quinone oxidoreductase</a>        | Energy                              | 94.972   | 113.961  | 88.964   | 78.807   | 39.045   | 178.552  |
| <a href="#">AMK58_17985</a> | <a href="#">no KO assigned   (GenBank) LysR family transcriptional regulator</a>                                      | Transcription                       | 136.548  | 157.151  | 122.230  | 32.817   | 48.843   | 87.759   |
| <a href="#">AMK58_17990</a> | <a href="#">no KO assigned   (GenBank) methyltransferase</a>                                                          | Methyltransferase                   | 163.451  | 131.567  | 147.819  | 101.307  | 131.853  | 164.337  |
| <a href="#">AMK58_17995</a> | <a href="#">no KO assigned   (GenBank) lytic transglycosylase</a>                                                     | transglycosylase                    | 383.222  | 368.194  | 420.893  | 188.243  | 229.478  | 230.945  |
| <a href="#">AMK58_18000</a> | <a href="#">K07115 23S rRNA (adenine2030-N6)-methyltransferase [EC:2.1.1.266]   (GenBank) lactate dehydrogenas</a>    | Ribosome                            | 85.905   | 76.641   | 83.735   | 114.496  | 111.953  | 252.874  |
| <a href="#">AMK58_18005</a> | <a href="#">no KO assigned   (GenBank) hypothetical protein</a>                                                       | Hypothetical                        | 7.658    | 10.168   | 11.443   | 158.929  | 43.861   | 74.846   |
| <a href="#">AMK58_18010</a> | <a href="#">no KO assigned   (GenBank) hypothetical protein</a>                                                       | Hypothetical                        | 1176.431 | 1290.778 | 1317.664 | 86.111   | 80.135   | 196.304  |
| <a href="#">AMK58_18015</a> | <a href="#">no KO assigned   (GenBank) protein tyrosine phosphatase</a>                                               | Phosphatase                         | 73.803   | 82.605   | 86.872   | 230.764  | 144.914  | 343.046  |
| <a href="#">AMK58_18020</a> | <a href="#">no KO assigned   (GenBank) hypothetical protein</a>                                                       | Hypothetical                        | 96.642   | 91.893   | 84.317   | 59.988   | 67.932   | 90.245   |
| <a href="#">AMK58_18025</a> | <a href="#">K20975 two-component system, sensor histidine kinase [EC:2.7.13.3]   (GenBank) histidine kinase</a>       | Signal Transduction                 | 52.869   | 46.784   | 46.171   | 60.703   | 26.875   | 74.889   |
| <a href="#">AMK58_18030</a> | <a href="#">K11085 ATP-binding cassette, subfamily B, bacterial MsbA [EC:3.6.3.-]   (GenBank) ABC transporter pe</a>  | Membrane Transport                  | 28.683   | 32.660   | 27.528   | 35.167   | 71.460   | 82.606   |
| <a href="#">AMK58_18035</a> | <a href="#">K07001 NTE family protein   (GenBank) lysophospholipase</a>                                               | No COG                              | 51.192   | 66.859   | 68.030   | 230.920  | 146.932  | 320.692  |
| <a href="#">AMK58_18040</a> | <a href="#">no KO assigned   (GenBank) hypothetical protein</a>                                                       | Hypothetical                        | 2112.082 | 2328.516 | 2164.236 | 981.868  | 1038.629 | 1504.414 |
| <a href="#">AMK58_18045</a> | <a href="#">no KO assigned   (GenBank) GCN5 family acetyltransferase</a>                                              | Acetyltransferase                   | 225.733  | 185.266  | 198.369  | 487.779  | 205.293  | 587.777  |
| <a href="#">AMK58_18050</a> | <a href="#">no KO assigned   (GenBank) hypothetical protein</a>                                                       | Hypothetical                        | 415.690  | 478.218  | 553.210  | 980.324  | 285.796  | 971.133  |
| <a href="#">AMK58_18055</a> | <a href="#">no KO assigned   (GenBank) hypothetical protein</a>                                                       | Hypothetical                        | 33.020   | 43.840   | 43.170   | 67.168   | 21.651   | 91.999   |
| <a href="#">AMK58_18060</a> | <a href="#">K11105 cell volume regulation protein A   (GenBank) potassium transporter</a>                             | Transport                           | 12.492   | 13.013   | 14.131   | 41.619   | 24.914   | 75.381   |
| <a href="#">AMK58_18065</a> | <a href="#">no KO assigned   (GenBank) diguanylate cyclase</a>                                                        | cyclic nucleotide                   | 2.504    | 3.479    | 2.602    | 20.283   | 40.520   | 12.636   |
| <a href="#">AMK58_18070</a> | <a href="#">K03089 RNA polymerase sigma-32 factor   (GenBank) RNA polymerase subunit sigma-70</a>                     | Transcription                       | 2.211    | 3.303    | 6.176    | 199.029  | 47.850   | 141.362  |
| <a href="#">AMK58_18075</a> | <a href="#">no KO assigned   (GenBank) regulator</a>                                                                  | Signal transduction                 | 224.392  | 231.474  | 252.341  | 945.003  | 685.910  | 986.476  |
| <a href="#">AMK58_18080</a> | <a href="#">no KO assigned   (GenBank) hypothetical protein</a>                                                       | Hypothetical                        | 481.185  | 622.472  | 642.776  | 238.226  | 699.850  | 516.929  |
| <a href="#">AMK58_18085</a> | <a href="#">no KO assigned   (GenBank) hypothetical protein</a>                                                       | Hypothetical                        | 1353.739 | 1767.670 | 1649.276 | 162.544  | 4504.294 | 567.049  |

|             |                                                                                                         |                              |          |          |          |          |          |          |
|-------------|---------------------------------------------------------------------------------------------------------|------------------------------|----------|----------|----------|----------|----------|----------|
| AMK58_18090 | K09767 cyclic-di-GMP-binding protein   (GenBank) nucleotide-binding protein                             | cyclic nucleotide            | 25.502   | 38.461   | 23.071   | 89.219   | 116.055  | 190.790  |
| AMK58_18095 | no KO assigned   (GenBank) hypothetical protein                                                         | Hypothetical                 | 79.364   | 137.397  | 96.468   | 364.239  | 180.697  | 339.736  |
| AMK58_18100 | no KO assigned   (GenBank) hypothetical protein                                                         | Hypothetical                 | 68.152   | 121.697  | 115.481  | 143.315  | 78.960   | 167.698  |
| AMK58_18105 | no KO assigned   (GenBank) hypothetical protein                                                         | Hypothetical                 | 162.174  | 163.695  | 121.808  | 88.781   | 135.053  | 191.579  |
| AMK58_18110 | K07216 hemerythrin   (GenBank) hemerythrin                                                              | hemerythrin                  | 5.303    | 10.560   | 10.644   | 331.869  | 165.563  | 292.010  |
| AMK58_18115 | no KO assigned   (GenBank) hypothetical protein                                                         | Hypothetical                 | 13.873   | 25.117   | 17.987   | 166.691  | 393.158  | 549.654  |
| AMK58_18120 | K12372 dipeptide transport system ATP-binding protein   (GenBank) peptide ABC transporter ATP-binding   | Membrane transport           | 4.937    | 4.424    | 8.332    | 96.882   | 171.469  | 167.661  |
| AMK58_18125 | K12371 dipeptide transport system ATP-binding protein   (GenBank) dppD: peptide ABC transporter ATP     | Transport: Amino Acid        | 82.062   | 111.061  | 91.863   | 68.806   | 102.689  | 138.806  |
| AMK58_18130 | K12370 dipeptide transport system permease protein   (GenBank) peptide transporter                      | Transport: Amino Acid        | 8.359    | 7.023    | 8.445    | 29.218   | 62.688   | 80.781   |
| AMK58_18135 | K12369 dipeptide transport system permease protein   (GenBank) peptide ABC transporter permease         | chemotaxis                   | 36.167   | 36.490   | 40.081   | 157.855  | 193.977  | 164.018  |
| AMK58_18140 | K12368 dipeptide transport system substrate-binding protein   (GenBank) peptide ABC transporter subs    | Hypothetical                 | 24.563   | 22.125   | 26.875   | 76.132   | 118.848  | 103.299  |
| AMK58_18145 | no KO assigned   (GenBank) hypothetical protein                                                         | Hypothetical                 | 107.876  | 71.274   | 134.426  | 361.433  | 457.924  | 368.348  |
| AMK58_18150 | no KO assigned   (GenBank) SAM-dependent methyltransferase                                              | methyltransferase            | 166.181  | 125.760  | 153.040  | 108.760  | 726.898  | 297.184  |
| AMK58_18155 | no KO assigned   (GenBank) DNA-binding protein                                                          | No COG                       | 3374.467 | 3083.779 | 2693.610 | 114.424  | 443.070  | 392.100  |
| AMK58_18160 | no KO assigned   (GenBank) hypothetical protein                                                         | Hypothetical                 | 47.443   | 52.154   | 58.702   | 104.565  | 56.030   | 137.140  |
| AMK58_18165 | K01712 urocanate hydratase [EC:4.2.1.49]   (GenBank) urocanate hydratase                                | Metabolism: Amino Acid       | 28.244   | 45.397   | 33.193   | 53.198   | 43.269   | 38.487   |
| AMK58_18170 | no KO assigned   (GenBank) hypothetical protein                                                         | Hypothetical                 | 12.418   | 20.234   | 17.174   | 224.565  | 221.429  | 127.448  |
| AMK58_18175 | no KO assigned   (GenBank) hypothetical protein                                                         | Hypothetical                 | 157.346  | 158.711  | 192.351  | 734.969  | 480.633  | 537.663  |
| AMK58_18180 | K01468 imidazolonepropionase [EC:3.5.2.7]   (GenBank) imidazolonepropionase                             | Metabolism: Amino Acid       | 296.658  | 331.017  | 313.332  | 342.659  | 300.525  | 232.671  |
| AMK58_18185 | K03478 chitin disaccharide deacetylase [EC:3.5.1.105]   (GenBank) hypothetical protein                  | Hydrolyases                  | 77.261   | 75.969   | 65.444   | 41.102   | 81.097   | 97.147   |
| AMK58_18190 | no KO assigned   (GenBank) hypothetical protein                                                         | Hypothetical                 | 70.469   | 76.291   | 65.354   | 55.751   | 60.781   | 53.504   |
| AMK58_18195 | no KO assigned   (GenBank) hypothetical protein                                                         | Hypothetical                 | 141.413  | 212.640  | 147.147  | 990.994  | 183.958  | 320.307  |
| AMK58_18200 | K08295 2-aminobenzoate-CoA ligase [EC:6.2.1.32]   (GenBank) 2-aminobenzoate-CoA ligase                  | Metabolism                   | 14.118   | 14.573   | 18.484   | 137.927  | 38.302   | 93.010   |
| AMK58_18205 | no KO assigned   (GenBank) hypothetical protein                                                         | Hypothetical                 | 773.113  | 881.590  | 895.529  | 318.290  | 464.134  | 258.454  |
| AMK58_18210 | no KO assigned   (GenBank) hypothetical protein                                                         | Hypothetical                 | 103.464  | 141.748  | 128.375  | 135.319  | 101.451  | 71.671   |
| AMK58_18215 | no KO assigned   (GenBank) regulator                                                                    | Signal transduction          | 245.043  | 305.720  | 239.650  | 333.756  | 275.781  | 344.576  |
| AMK58_18220 | K01433 formyltetrahydrofolate deformylase [EC:3.5.1.101]   (GenBank) formyltetrahydrofolate deformylase | Metabolism                   | 54.463   | 60.071   | 50.721   | 105.505  | 55.097   | 104.241  |
| AMK58_18225 | no KO assigned   (GenBank) hypothetical protein                                                         | Hypothetical                 | 99.634   | 97.954   | 95.932   | 123.892  | 349.684  | 398.401  |
| AMK58_18230 | no KO assigned   (GenBank) hypothetical protein                                                         | Hypothetical                 | 230.552  | 248.047  | 301.029  | 299.826  | 381.426  | 425.850  |
| AMK58_18235 | no KO assigned   (GenBank) hypothetical protein                                                         | Hypothetical                 | 226.718  | 216.297  | 189.231  | 195.842  | 216.148  | 357.722  |
| AMK58_18240 | no KO assigned   (GenBank) hypothetical protein                                                         | Hypothetical                 | 25.224   | 32.084   | 23.364   | 63.436   | 31.462   | 143.959  |
| AMK58_18245 | K01448 N-acetylmuramoyl-L-alanine amidase [EC:3.5.1.28]   (GenBank) N-acetylmuramoyl-L-alanine ami      | Defense                      | 17.145   | 14.503   | 14.570   | 80.890   | 17.566   | 125.213  |
| AMK58_18250 | no KO assigned   (GenBank) hypothetical protein                                                         | Hypothetical                 | 11.383   | 11.129   | 11.610   | 131.967  | 27.451   | 201.702  |
| AMK58_18255 | no KO assigned   (GenBank) hypothetical protein                                                         | Hypothetical                 | 10.505   | 9.938    | 9.989    | 92.175   | 15.942   | 113.163  |
| AMK58_18260 | no KO assigned   (GenBank) hypothetical protein                                                         | Hypothetical                 | 32.287   | 38.691   | 35.874   | 185.697  | 115.943  | 137.160  |
| AMK58_18265 | no KO assigned   (GenBank) hypothetical protein                                                         | Hypothetical                 | 15.210   | 8.425    | 13.057   | 19.700   | 21.248   | 29.142   |
| AMK58_18270 | no KO assigned   (GenBank) hypothetical protein                                                         | Hypothetical                 | 377.118  | 438.757  | 366.745  | 1670.603 | 570.402  | 1031.899 |
| AMK58_18275 | no KO assigned   (GenBank) hypothetical protein                                                         | Hypothetical                 | 5.451    | 8.006    | 7.990    | 56.374   | 9.292    | 23.292   |
| AMK58_18280 | K06601 flagellar protein FliT   (GenBank) flagellar protein                                             | Motility                     | 100.611  | 132.445  | 129.441  | 1795.466 | 212.126  | 1182.521 |
| AMK58_18285 | no KO assigned   (GenBank) flagellin                                                                    | motility                     | 161.238  | 346.947  | 223.452  | 15.732   | 69.724   | 47.772   |
| AMK58_18290 | K00648 3-oxoacyl-[acyl-carrier-protein] synthase III [EC:2.3.1.180]   (GenBank) 3-oxoacyl-ACP synth     | Metabolism: Lipid            | 114.874  | 144.931  | 154.733  | 1085.611 | 210.559  | 871.426  |
| AMK58_18295 | K00059 3-oxoacyl-[acyl-carrier-protein] reductase [EC:1.1.1.100]   (GenBank) short-chain dehydrogena    | Metabolism: Lipid            | 214.858  | 223.331  | 223.790  | 56.056   | 108.949  | 185.276  |
| AMK58_18300 | no KO assigned   (GenBank) AMP-binding protein                                                          | Metabolism                   | 4066.575 | 4879.175 | 4072.729 | 138.204  | 57.985   | 285.598  |
| AMK58_18305 | no KO assigned   (GenBank) hypothetical protein                                                         | Hypothetical                 | 132.194  | 159.926  | 164.847  | 647.640  | 178.680  | 616.338  |
| AMK58_18310 | K00627 pyruvate dehydrogenase E2 component (dihydrolipoamide acetyltransferase) [EC:2.3.1.12]   (Gen    | Metabolism: Carbon           | 26.019   | 33.562   | 33.032   | 256.052  | 26.089   | 105.279  |
| AMK58_18315 | K02078 acyl carrier protein   (GenBank) hypothetical protein                                            | Lipid metabolism             | 180.060  | 225.662  | 219.415  | 1429.176 | 184.366  | 653.467  |
| AMK58_18320 | K07257 spore coat polysaccharide biosynthesis protein SpsF   (GenBank) spore coat protein               | Biosynthesis: polysaccharide | 29.990   | 34.309   | 29.879   | 22.864   | 17.034   | 54.434   |
| AMK58_18325 | no KO assigned   (GenBank) pseudaminic acid synthase                                                    | No COG                       | 67.724   | 76.251   | 83.305   | 145.397  | 24.427   | 92.225   |
| AMK58_18330 | no KO assigned   (GenBank) hypothetical protein                                                         | Hypothetical                 | 74.618   | 86.821   | 74.169   | 5.648    | 6.686    | 13.754   |
| AMK58_18335 | no KO assigned   (GenBank) hypothetical protein                                                         | Hypothetical                 | 6.963    | 10.307   | 7.850    | 79.071   | 5.264    | 28.624   |
| AMK58_18340 | K00966 mannose-1-phosphate guanylyltransferase [EC:2.7.7.13]   (GenBank) nucleotidyl transferase        | Hypothetical                 | 76.714   | 78.712   | 78.173   | 347.382  | 44.427   | 222.529  |
| AMK58_18345 | no KO assigned   (GenBank) acetyltransferase                                                            | Acetyltransferase            | 78.962   | 79.936   | 86.548   | 322.021  | 119.821  | 377.893  |
| AMK58_18350 | no KO assigned   (GenBank) short-chain dehydrogenase                                                    | dehydrogenase                | 16.489   | 22.517   | 22.845   | 623.501  | 64.605   | 166.730  |
| AMK58_18355 | no KO assigned   (GenBank) (2Fe-2S)-binding protein                                                     | No COG                       | 34.133   | 44.248   | 41.026   | 152.409  | 29.559   | 101.222  |
| AMK58_18360 | K00648 3-oxoacyl-[acyl-carrier-protein] synthase III [EC:2.3.1.180]   (GenBank) 3-oxoacyl-ACP synth     | Lipid metabolism             | 24.819   | 20.038   | 16.689   | 89.255   | 24.253   | 140.052  |
| AMK58_18365 | no KO assigned   (GenBank) short-chain dehydrogenase                                                    | dehydrogenase                | 24.498   | 20.640   | 30.609   | 171.442  | 29.125   | 114.745  |
| AMK58_18370 | no KO assigned   (GenBank) hypothetical protein                                                         | Hypothetical                 | 84.660   | 90.073   | 93.286   | 174.769  | 95.031   | 225.400  |
| AMK58_18375 | no KO assigned   (GenBank) hypothetical protein                                                         | Hypothetical                 | 107.981  | 113.594  | 130.468  | 255.893  | 114.722  | 270.778  |
| AMK58_18380 | K00426 cytochrome d ubiquinol oxidase subunit II [EC:1.10.3.14]   (GenBank) ubiquinol oxidase subuni    | Energy                       | 6.846    | 6.459    | 11.992   | 125.984  | 37.129   | 55.801   |
| AMK58_18385 | K00425 cytochrome d ubiquinol oxidase subunit I [EC:1.10.3.14]   (GenBank) cytochrome D ubiquinol ox    | Energy                       | 7.299    | 7.695    | 11.267   | 144.242  | 43.048   | 45.624   |
| AMK58_18390 | K03089 RNA polymerase sigma-32 factor   (GenBank) RNA polymerase subunit sigma-70                       | Transcription                | 20.179   | 24.916   | 24.559   | 105.241  | 97.836   | 55.386   |
| AMK58_18395 | no KO assigned   (GenBank) hypothetical protein                                                         | Hypothetical                 | 9.375    | 7.594    | 14.201   | 108.762  | 204.140  | 297.176  |
| AMK58_18400 | K18480 cholesterol transport system auxiliary component   (GenBank) hypothetical protein                | Transport: Lipid             | 15.271   | 15.206   | 21.434   | 163.891  | 229.478  | 545.165  |
| AMK58_18405 | K02067 phospholipid/cholesterol/gamma-HCH transport system substrate-binding protein   (GenBank) AB     | Transport: phospholipid      | 439.905  | 496.553  | 539.740  | 135.831  | 4581.804 | 422.532  |
| AMK58_18410 | K02065 phospholipid/cholesterol/gamma-HCH transport system ATP-binding protein   (GenBank) ABC tr       | Transport: Lipid             | 140.416  | 128.293  | 137.129  | 182.587  | 682.520  | 220.162  |
| AMK58_18415 | K02066 phospholipid/cholesterol/gamma-HCH transport system permease protein   (GenBank) ABC trans       | Transport: phospholipid      | 27.178   | 28.080   | 26.424   | 140.698  | 95.897   | 108.480  |
| AMK58_18420 | K00759 adenine phosphoribosyltransferase [EC:2.4.2.7]   (GenBank) adenine phosphoribosyltransferase     | Metabolism: Nucleotide       | 89.633   | 113.550  | 82.993   | 197.703  | 283.527  | 380.977  |

|                             |                                                                                                                       |                                |          |          |          |          |          |          |
|-----------------------------|-----------------------------------------------------------------------------------------------------------------------|--------------------------------|----------|----------|----------|----------|----------|----------|
| <a href="#">AMK58_18425</a> | <a href="#">K06978 uncharacterized protein   (GenBank) X-Pro dipeptidyl-peptidase</a>                                 | peptidase                      | 10.704   | 10.803   | 14.098   | 96.498   | 35.040   | 87.254   |
| <a href="#">AMK58_18430</a> | <a href="#">no KO assigned   (GenBank) cell filamentation protein Fic</a>                                             | Cell Cycle/Shape/Homeostasis   | 77.716   | 62.745   | 81.025   | 207.606  | 140.309  | 285.752  |
| <a href="#">AMK58_18435</a> | <a href="#">K07216 hemerythrin   (GenBank) hemerythrin</a>                                                            | hemerythrin                    | 130.170  | 103.579  | 124.847  | 214.344  | 97.438   | 231.655  |
| <a href="#">AMK58_18440</a> | <a href="#">no KO assigned   (GenBank) hypothetical protein</a>                                                       | Hypothetical                   | 15.567   | 17.223   | 21.562   | 352.690  | 100.882  | 184.265  |
| <a href="#">AMK58_18445</a> | <a href="#">no KO assigned   (GenBank) hypothetical protein</a>                                                       | Hypothetical                   | 60.918   | 94.021   | 71.919   | 287.650  | 120.401  | 236.072  |
| <a href="#">AMK58_18450</a> | <a href="#">no KO assigned   (GenBank) hypothetical protein</a>                                                       | Hypothetical                   | 600.265  | 814.920  | 569.766  | 123.179  | 378.994  | 541.926  |
| <a href="#">AMK58_18455</a> | <a href="#">no KO assigned   (GenBank) hypothetical protein</a>                                                       | Hypothetical                   | 11.437   | 17.845   | 18.078   | 68.895   | 160.577  | 101.056  |
| <a href="#">AMK58_18460</a> | <a href="#">no KO assigned   (GenBank) hypothetical protein</a>                                                       | Hypothetical                   | 58.256   | 68.142   | 60.062   | 70.986   | 68.441   | 189.231  |
| <a href="#">AMK58_18465</a> | <a href="#">K07313 serine/threonine protein phosphatase 1   EC:3.1.3.16   (GenBank) metallophosphoesterase</a>        | Hydrolase                      | 2.895    | 5.087    | 2.752    | 80.751   | 3.445    | 43.266   |
| <a href="#">AMK58_18470</a> | <a href="#">no KO assigned   (GenBank) transcriptional regulator</a>                                                  | Transcription                  | 37.017   | 35.130   | 42.947   | 235.760  | 96.888   | 309.051  |
| <a href="#">AMK58_18475</a> | <a href="#">no KO assigned   (GenBank) aldo/keto reductase</a>                                                        | enzyme                         | 4.833    | 8.663    | 9.191    | 185.170  | 25.127   | 123.026  |
| <a href="#">AMK58_18480</a> | <a href="#">K00873 pyruvate kinase   EC:2.7.1.40   (GenBank) pyruvate kinase</a>                                      | Metabolism                     | 32.252   | 42.310   | 49.893   | 101.038  | 168.030  | 92.806   |
| <a href="#">AMK58_18485</a> | <a href="#">K07483 transposase   (GenBank) hypothetical protein</a>                                                   | Hypothetical                   | 31.621   | 17.400   | 55.779   | 812.044  | 478.898  | 518.138  |
| <a href="#">AMK58_18490</a> | <a href="#">no KO assigned   (GenBank) LysR family transcriptional regulator</a>                                      | Transcription                  | 24.566   | 25.805   | 25.411   | 151.518  | 321.799  | 242.187  |
| <a href="#">AMK58_18495</a> | <a href="#">K20276 large repetitive protein   (GenBank) hypothetical protein</a>                                      | Quorum sensing                 | 24.759   | 24.805   | 24.339   | 11.748   | 86.043   | 18.983   |
| <a href="#">AMK58_18500</a> | <a href="#">no KO assigned   (GenBank) hypothetical protein</a>                                                       | Hypothetical                   | 706.455  | 741.052  | 672.055  | 382.898  | 481.945  | 1172.480 |
| <a href="#">AMK58_18505</a> | <a href="#">K01951 GMP synthase (glutamine-hydrolysing)   EC:6.3.5.21   (GenBank) guaA: GMP synthetase</a>            | Metabolism: Nucleotide         | 59.405   | 66.692   | 76.301   | 1288.912 | 309.215  | 1564.464 |
| <a href="#">AMK58_18510</a> | <a href="#">no KO assigned   (GenBank) GNAT family acetyltransferase</a>                                              | Acetyltransferase              | 12.802   | 5.185    | 7.840    | 22.671   | 63.169   | 107.642  |
| <a href="#">AMK58_18515</a> | <a href="#">no KO assigned   (GenBank) purine nucleoside permease</a>                                                 | Metabolism: Nucleotide         | 335.686  | 269.485  | 318.044  | 213.227  | 278.724  | 254.918  |
| <a href="#">AMK58_18520</a> | <a href="#">no KO assigned   (GenBank) hypothetical protein</a>                                                       | Hypothetical                   | 168.409  | 206.886  | 194.470  | 298.676  | 417.801  | 256.649  |
| <a href="#">AMK58_18525</a> | <a href="#">no KO assigned   (GenBank) hypothetical protein</a>                                                       | Hypothetical                   | 264.228  | 176.584  | 202.361  | 142.151  | 58.440   | 211.111  |
| <a href="#">AMK58_18530</a> | <a href="#">K03500 16S rRNA (cytosine967-C5)-methyltransferase   EC:2.1.1.176   (GenBank) rRNA cytosine-C5-m</a>      | Ribosome                       | 5.753    | 6.345    | 6.059    | 40.309   | 7.561    | 95.692   |
| <a href="#">AMK58_18535</a> | <a href="#">K08304 membrane-bound lytic murein transglycosylase A   (GenBank) murein transglycosylase</a>             | Cell Wall                      | 16.496   | 26.033   | 22.590   | 83.664   | 16.093   | 202.797  |
| <a href="#">AMK58_18540</a> | <a href="#">no KO assigned   (GenBank) GCN5 family acetyltransferase</a>                                              | Acetyltransferase              | 149.769  | 165.856  | 163.030  | 594.994  | 87.058   | 284.460  |
| <a href="#">AMK58_18545</a> | <a href="#">K09984 uncharacterized protein   (GenBank) hypothetical protein</a>                                       | Hypothetical                   | 216.379  | 180.113  | 213.594  | 767.940  | 148.664  | 513.555  |
| <a href="#">AMK58_18550</a> | <a href="#">K03437 RNA methyltransferase, TrmH family   (GenBank) RNA methyltransferase</a>                           | tRNA synthesis/modification    | 13.665   | 15.189   | 15.712   | 77.049   | 52.866   | 126.709  |
| <a href="#">AMK58_18555</a> | <a href="#">K00088 IMP dehydrogenase   EC:1.1.1.205   (GenBank) inosine-5'-monophosphate dehydrogenase</a>            | Metabolism: Nucleotide         | 6.713    | 8.804    | 8.173    | 32.898   | 9.570    | 41.143   |
| <a href="#">AMK58_18560</a> | <a href="#">K02427 23S rRNA (uridine2552-2'-O)-methyltransferase   EC:2.1.1.166   (GenBank) 23S rRNA methyltr</a>     | Ribosome                       | 28.098   | 25.434   | 26.553   | 211.458  | 31.583   | 161.220  |
| <a href="#">AMK58_18565</a> | <a href="#">K01524 exopolyphosphatase / guanosine-5'-triphosphate 3'-diphosphate pyrophosphatase   EC:3.6.1.11.3.</a> | Metabolism: Nucleotide         | 323.807  | 302.980  | 288.748  | 172.746  | 357.757  | 224.539  |
| <a href="#">AMK58_18570</a> | <a href="#">K14223 tRNA Gln   (GenBank) tRNA-Gln</a>                                                                  | tRNA synthesis/modification    | 1420.175 | 1632.438 | 1855.904 | 2857.978 | 1537.485 | 1964.719 |
| <a href="#">AMK58_18575</a> | <a href="#">no KO assigned   (GenBank) hypothetical protein</a>                                                       | Hypothetical                   | 602.069  | 791.950  | 791.939  | 242.580  | 279.812  | 381.168  |
| <a href="#">AMK58_18580</a> | <a href="#">no KO assigned   (GenBank) transposase</a>                                                                | Genetic Information Processing | 0.198    | 0.592    | 0.660    | 6.774    | 2.787    | 18.022   |
| <a href="#">AMK58_18585</a> | <a href="#">K01689 enolase   EC:4.2.1.11   (GenBank) phosphopyruvate hydratase</a>                                    | Metabolism: Carbon             | 5.860    | 2.259    | 6.740    | 62.292   | 69.056   | 88.343   |
| <a href="#">AMK58_18590</a> | <a href="#">no KO assigned   (GenBank) hypothetical protein</a>                                                       | Hypothetical                   | 7.693    | 10.606   | 9.340    | 89.575   | 69.044   | 267.669  |
| <a href="#">AMK58_18595</a> | <a href="#">no KO assigned   (GenBank) GntR family transcriptional regulator</a>                                      | Transcription                  | 16.030   | 23.661   | 22.952   | 254.647  | 73.134   | 286.095  |
| <a href="#">AMK58_18600</a> | <a href="#">no KO assigned   (GenBank) phytyl-CoA dioxygenase</a>                                                     | No COG                         | 8.391    | 12.732   | 10.005   | 109.016  | 82.195   | 79.293   |
| <a href="#">AMK58_18605</a> | <a href="#">no KO assigned   (GenBank) C4-dicarboxylate ABC transporter permease</a>                                  | Membrane Transport             | 29.076   | 30.140   | 32.007   | 64.383   | 130.629  | 90.921   |
| <a href="#">AMK58_18610</a> | <a href="#">no KO assigned   (GenBank) hypothetical protein</a>                                                       | Hypothetical                   | 75.292   | 63.520   | 80.666   | 286.005  | 94.875   | 351.899  |
| <a href="#">AMK58_18615</a> | <a href="#">no KO assigned   (GenBank) C4-dicarboxylate ABC transporter substrate-binding protein</a>                 | Membrane Transport             | 21.046   | 22.108   | 24.629   | 126.248  | 53.033   | 207.275  |
| <a href="#">AMK58_18620</a> | <a href="#">no KO assigned   (GenBank) alcohol dehydrogenase</a>                                                      | dehydrogenase                  | 18.034   | 12.231   | 15.479   | 34.474   | 30.900   | 95.004   |
| <a href="#">AMK58_18625</a> | <a href="#">no KO assigned   (GenBank) hypothetical protein</a>                                                       | Hypothetical                   | 69.554   | 67.547   | 83.414   | 232.543  | 110.837  | 285.186  |
| <a href="#">AMK58_18630</a> | <a href="#">no KO assigned   (GenBank) hypothetical protein</a>                                                       | Hypothetical                   | 86.957   | 82.030   | 96.921   | 763.556  | 153.397  | 655.099  |
| <a href="#">AMK58_18635</a> | <a href="#">no KO assigned   (GenBank) hypothetical protein</a>                                                       | Hypothetical                   | 9.025    | 16.278   | 10.686   | 160.361  | 19.715   | 52.582   |
| <a href="#">AMK58_18640</a> | <a href="#">no KO assigned   (GenBank) fatty acid hydroxylase</a>                                                     | hydroxylase                    | 1.943    | 4.465    | 1.563    | 24.628   | 3.864    | 14.969   |
| <a href="#">AMK58_18645</a> | <a href="#">no KO assigned   (GenBank) hypothetical protein</a>                                                       | Hypothetical                   | 14.785   | 14.324   | 21.276   | 348.459  | 30.542   | 227.504  |
| <a href="#">AMK58_18650</a> | <a href="#">no KO assigned   (GenBank) hypothetical protein</a>                                                       | Hypothetical                   | 130.761  | 115.737  | 110.514  | 247.820  | 260.210  | 809.539  |
| <a href="#">AMK58_18655</a> | <a href="#">no KO assigned   (GenBank) hypothetical protein</a>                                                       | Hypothetical                   | 46.217   | 42.779   | 55.703   | 172.649  | 51.950   | 472.016  |
| <a href="#">AMK58_18660</a> | <a href="#">K01207 beta-N-acetylhexosaminidase   EC:3.2.1.52   (GenBank) hypothetical protein</a>                     | Defense                        | 1.787    | 2.248    | 4.293    | 78.888   | 4.336    | 52.776   |
| <a href="#">AMK58_18665</a> | <a href="#">K06143 inner membrane protein   (GenBank) hypothetical protein</a>                                        | Membrane                       | 1.762    | 1.053    | 1.927    | 11.214   | 3.863    | 13.237   |
| <a href="#">AMK58_18670</a> | <a href="#">no KO assigned   (GenBank) histidine kinase</a>                                                           | Signal Transduction            | 0.494    | 2.460    | 2.349    | 162.407  | 11.665   | 52.011   |
| <a href="#">AMK58_18675</a> | <a href="#">no KO assigned   (GenBank) hypothetical protein</a>                                                       | Hypothetical                   | 11.119   | 14.762   | 17.229   | 766.246  | 100.913  | 717.533  |
| <a href="#">AMK58_18680</a> | <a href="#">K14230 tRNA Met   (GenBank) tRNA-Met</a>                                                                  | tRNA synthesis/modification    | 20.441   | 37.577   | 56.812   | 2582.336 | 316.372  | 1344.320 |
| <a href="#">AMK58_18685</a> | <a href="#">K01985 5S ribosomal RNA   (GenBank) 5S ribosomal RNA</a>                                                  | Ribosome                       | 1.044    | 6.236    | 6.947    | 483.761  | 76.259   | 473.275  |
| <a href="#">AMK58_18690</a> | <a href="#">K01980 23S ribosomal RNA   (GenBank) 23S ribosomal RNA</a>                                                | Ribosome                       | 8.576    | 8.934    | 7.067    | 4.065    | 45.974   | 8.442    |
| <a href="#">AMK58_18695</a> | <a href="#">K14218 tRNA Ala   (GenBank) tRNA-Ala</a>                                                                  | tRNA synthesis/modification    | 0.000    | 0.000    | 0.000    | 0.000    | 0.000    | 0.000    |
| <a href="#">AMK58_18700</a> | <a href="#">K14227 tRNA Ile   (GenBank) tRNA-Ile</a>                                                                  | tRNA synthesis/modification    | 0.000    | 0.000    | 0.000    | 0.000    | 0.000    | 0.000    |
| <a href="#">AMK58_18705</a> | <a href="#">K01977 16S ribosomal RNA   (GenBank) 16S ribosomal RNA</a>                                                | Ribosome                       | 0.000    | 0.000    | 0.000    | 0.000    | 0.000    | 0.000    |
| <a href="#">AMK58_18710</a> | <a href="#">no KO assigned   (GenBank) hypothetical protein</a>                                                       | Hypothetical                   | 0.000    | 0.000    | 0.000    | 0.000    | 0.000    | 0.000    |
| <a href="#">AMK58_18715</a> | <a href="#">no KO assigned   (GenBank) acyl carrier protein</a>                                                       | No COG                         | 0.000    | 0.000    | 0.000    | 0.000    | 0.000    | 0.000    |
| <a href="#">AMK58_18720</a> | <a href="#">no KO assigned   (GenBank) hypothetical protein</a>                                                       | Hypothetical                   | 34.843   | 27.327   | 41.315   | 33.338   | 67.744   | 110.274  |
| <a href="#">AMK58_18725</a> | <a href="#">K02017 molybdate transport system ATP-binding protein   EC:3.6.3.29   (GenBank) molybdenum ABC tr</a>     | Transport: organic             | 110.985  | 145.731  | 110.691  | 44.111   | 24.053   | 144.964  |
| <a href="#">AMK58_18730</a> | <a href="#">K02018 molybdate transport system permease protein   (GenBank) molybdenum ABC transporter permea</a>      | Membrane Transport             | 138.630  | 160.025  | 178.787  | 281.704  | 49.958   | 242.664  |
| <a href="#">AMK58_18735</a> | <a href="#">K02020 molybdate transport system substrate-binding protein   (GenBank) molybdate ABC transporter su</a>  | Membrane Transport             | 583.979  | 791.140  | 935.438  | 385.599  | 58.482   | 164.121  |
| <a href="#">AMK58_18740</a> | <a href="#">K02019 molybdate transport system regulatory protein   (GenBank) molybdenum-dependent transcriptiona</a>  | Transcription                  | 748.004  | 914.241  | 1027.495 | 116.520  | 33.851   | 111.703  |
| <a href="#">AMK58_18745</a> | <a href="#">K09797 uncharacterized protein   (GenBank) hypothetical protein</a>                                       | Hypothetical                   | 2203.660 | 2620.682 | 3071.254 | 150.886  | 63.956   | 236.349  |
| <a href="#">AMK58_18750</a> | <a href="#">no KO assigned   (GenBank) hypothetical protein</a>                                                       | Hypothetical                   | 252.303  | 356.303  | 395.706  | 163.563  | 24.705   | 147.548  |
| <a href="#">AMK58_18755</a> | <a href="#">no KO assigned   (GenBank) hypothetical protein</a>                                                       | Hypothetical                   | 46.196   | 51.560   | 70.712   | 427.735  | 47.647   | 312.096  |

|                             |                                                                                                                            |                             |          |          |          |          |          |          |
|-----------------------------|----------------------------------------------------------------------------------------------------------------------------|-----------------------------|----------|----------|----------|----------|----------|----------|
| <a href="#">AMK58_18760</a> | <a href="#">no KO assigned   (GenBank) hypothetical protein.</a>                                                           | Hypothetical                | 538.544  | 466.681  | 530.620  | 235.431  | 107.314  | 492.940  |
| <a href="#">AMK58_18765</a> | <a href="#">K11902 type VI secretion system protein ImpA   (GenBank) hypothetical protein.</a>                             | Secretion System            | 89.637   | 76.690   | 102.811  | 40.364   | 21.276   | 102.384  |
| <a href="#">AMK58_18770</a> | <a href="#">K11891 type VI secretion system protein ImpL   (GenBank) hypothetical protein.</a>                             | Secretion System            | 18.994   | 19.933   | 21.955   | 13.290   | 3.520    | 31.616   |
| <a href="#">AMK58_18775</a> | <a href="#">K11892 type VI secretion system protein ImpK   (GenBank) hypothetical protein.</a>                             | Secretion System            | 67.173   | 72.744   | 106.013  | 278.557  | 25.681   | 147.536  |
| <a href="#">AMK58_18780</a> | <a href="#">K11893 type VI secretion system protein ImpJ   (GenBank) hypothetical protein.</a>                             | Secretion System            | 102.517  | 117.330  | 159.488  | 458.803  | 34.935   | 179.682  |
| <a href="#">AMK58_18785</a> | <a href="#">K11918 type VI secretion system protein   (GenBank) hypothetical protein.</a>                                  | Secretion System            | 62.421   | 75.550   | 99.514   | 199.308  | 12.097   | 109.276  |
| <a href="#">AMK58_18790</a> | <a href="#">no KO assigned   (GenBank) hypothetical protein.</a>                                                           | Hypothetical                | 153.554  | 185.402  | 221.065  | 259.325  | 14.459   | 149.693  |
| <a href="#">AMK58_18795</a> | <a href="#">no KO assigned   (GenBank) hypothetical protein.</a>                                                           | Hypothetical                | 32.000   | 35.668   | 61.760   | 159.627  | 2.147    | 114.484  |
| <a href="#">AMK58_18800</a> | <a href="#">no KO assigned   (GenBank) hypothetical protein.</a>                                                           | Hypothetical                | 22.399   | 40.990   | 43.361   | 188.406  | 4.763    | 64.555   |
| <a href="#">AMK58_18805</a> | <a href="#">no KO assigned   (GenBank) hypothetical protein.</a>                                                           | Hypothetical                | 2.870    | 2.500    | 3.695    | 37.803   | 1.479    | 12.696   |
| <a href="#">AMK58_18810</a> | <a href="#">no KO assigned   (GenBank) hypothetical protein.</a>                                                           | Hypothetical                | 4.173    | 8.930    | 7.698    | 41.631   | 1.470    | 19.751   |
| <a href="#">AMK58_18815</a> | <a href="#">no KO assigned   (GenBank) hypothetical protein.</a>                                                           | Hypothetical                | 42.288   | 51.874   | 76.287   | 296.156  | 10.663   | 143.729  |
| <a href="#">AMK58_18820</a> | <a href="#">no KO assigned   (GenBank) hypothetical protein.</a>                                                           | Hypothetical                | 122.612  | 112.522  | 190.038  | 1161.045 | 34.995   | 301.881  |
| <a href="#">AMK58_18825</a> | <a href="#">no KO assigned   (GenBank) hypothetical protein.</a>                                                           | Hypothetical                | 20.077   | 28.151   | 33.309   | 155.874  | 8.750    | 71.997   |
| <a href="#">AMK58_18830</a> | <a href="#">K11901 type VI secretion system protein ImpB   (GenBank) type VI secretion protein.</a>                        | Secretion System            | 3.382    | 4.041    | 3.644    | 124.433  | 7.350    | 49.549   |
| <a href="#">AMK58_18835</a> | <a href="#">K11900 type VI secretion system protein ImpC   (GenBank) EvpB family type VI secretion protein.</a>            | Secretion System            | 20.426   | 24.112   | 27.174   | 72.708   | 8.610    | 59.495   |
| <a href="#">AMK58_18840</a> | <a href="#">no KO assigned   (GenBank) hypothetical protein.</a>                                                           | Hypothetical                | 2126.552 | 2149.039 | 3027.450 | 164.700  | 29.803   | 215.619  |
| <a href="#">AMK58_18845</a> | <a href="#">K11897 type VI secretion system protein ImpF   (GenBank) hypothetical protein.</a>                             | Secretion System            | 5979.881 | 5228.962 | 8402.679 | 442.036  | 162.482  | 664.813  |
| <a href="#">AMK58_18850</a> | <a href="#">K11896 type VI secretion system protein ImpG   (GenBank) hypothetical protein.</a>                             | Secretion System            | 1049.921 | 861.023  | 1301.670 | 18.773   | 29.157   | 71.535   |
| <a href="#">AMK58_18855</a> | <a href="#">K11895 type VI secretion system protein ImpH   (GenBank) hypothetical protein.</a>                             | Secretion System            | 149.150  | 135.629  | 218.142  | 82.709   | 11.218   | 104.744  |
| <a href="#">AMK58_18860</a> | <a href="#">K11907 type VI secretion system protein VasG   (GenBank) ClpV1 family T6SS ATPase.</a>                         | Secretion System            | 18.374   | 23.227   | 36.965   | 146.562  | 6.971    | 91.841   |
| <a href="#">AMK58_18865</a> | <a href="#">K11904 type VI secretion system secreted protein VgrG   (GenBank) hypothetical protein.</a>                    | Secretion System            | 11.548   | 11.498   | 20.074   | 129.139  | 6.162    | 51.322   |
| <a href="#">AMK58_18870</a> | <a href="#">no KO assigned   (GenBank) hypothetical protein.</a>                                                           | Hypothetical                | 91.261   | 94.492   | 159.542  | 836.256  | 36.169   | 281.180  |
| <a href="#">AMK58_18875</a> | <a href="#">no KO assigned   (GenBank) hypothetical protein.</a>                                                           | Hypothetical                | 272.033  | 265.046  | 349.458  | 622.744  | 253.140  | 1190.116 |
| <a href="#">AMK58_18880</a> | <a href="#">K02346 DNA polymerase IV [EC:2.7.7.7]   (GenBank) DNA polymerase IV.</a>                                       | DNA Repair and Replication  | 19.675   | 21.701   | 33.001   | 80.687   | 26.652   | 118.257  |
| <a href="#">AMK58_18885</a> | <a href="#">K07167 putative transcriptional regulator   (GenBank) hypothetical protein.</a>                                | Transcription               | 54.428   | 71.893   | 106.846  | 118.044  | 85.735   | 181.623  |
| <a href="#">AMK58_18890</a> | <a href="#">K03088 RNA polymerase sigma-70 factor, ECF subfamily   (GenBank) RNA polymerase subunit sigma.</a>             | Transcription               | 24.722   | 35.347   | 34.154   | 535.242  | 142.743  | 280.184  |
| <a href="#">AMK58_18895</a> | <a href="#">no KO assigned   (GenBank) Fis family transcriptional regulator.</a>                                           | Transcription               | 16.261   | 26.176   | 25.555   | 106.882  | 21.782   | 57.580   |
| <a href="#">AMK58_18900</a> | <a href="#">K00656 formate C-acetyltransferase [EC:2.3.1.54]   (GenBank) formate acetyltransferase.</a>                    | Metabolism: Carbohydrate    | 22.486   | 21.229   | 26.574   | 25.006   | 19.851   | 88.225   |
| <a href="#">AMK58_18905</a> | <a href="#">K09857 uncharacterized protein   (GenBank) hypothetical protein.</a>                                           | Hypothetical                | 191.306  | 245.846  | 208.042  | 338.682  | 749.180  | 493.106  |
| <a href="#">AMK58_18910</a> | <a href="#">K06192 paraquat-inducible protein B   (GenBank) hypothetical protein.</a>                                      | Membrane                    | 350.206  | 361.246  | 311.454  | 133.314  | 125.443  | 201.200  |
| <a href="#">AMK58_18915</a> | <a href="#">K03808 paraquat-inducible protein A   (GenBank) paraquat-inducible protein A.</a>                              | No COG                      | 13.832   | 23.772   | 21.979   | 233.761  | 30.882   | 121.933  |
| <a href="#">AMK58_18920</a> | <a href="#">no KO assigned   (GenBank) hypothetical protein.</a>                                                           | Hypothetical                | 31.562   | 43.278   | 46.736   | 465.765  | 71.342   | 382.708  |
| <a href="#">AMK58_18925</a> | <a href="#">no KO assigned   (GenBank) hypothetical protein.</a>                                                           | Hypothetical                | 10.143   | 10.242   | 11.953   | 60.856   | 19.430   | 44.577   |
| <a href="#">AMK58_18930</a> | <a href="#">K00029 malate dehydrogenase (oxaloacetate-decarboxylating) (NADP+) [EC:1.1.1.40]   (GenBank) malic enzyme.</a> | Metabolism                  | 569.245  | 734.897  | 569.389  | 36.577   | 191.610  | 95.906   |
| <a href="#">AMK58_18935</a> | <a href="#">K11103 aerobic C4-dicarboxylate transport protein   (GenBank) glutamate:protein symporter.</a>                 | Transport                   | 43.055   | 56.113   | 56.887   | 327.361  | 30.835   | 121.927  |
| <a href="#">AMK58_18940</a> | <a href="#">K10125 two-component system, NtrC family, C4-dicarboxylate transport sensor histidine kinase DctB [E].</a>     | Signal Transduction         | 624.622  | 525.515  | 618.887  | 198.042  | 190.996  | 221.149  |
| <a href="#">AMK58_18945</a> | <a href="#">K10126 two-component system, NtrC family, C4-dicarboxylate transport response regulator DctD   (GenB).</a>     | Signal Transduction         | 56.063   | 53.990   | 87.340   | 105.421  | 50.591   | 222.343  |
| <a href="#">AMK58_18950</a> | <a href="#">no KO assigned   (GenBank) hypothetical protein.</a>                                                           | Hypothetical                | 10.467   | 9.029    | 12.560   | 111.273  | 25.671   | 85.850   |
| <a href="#">AMK58_18955</a> | <a href="#">no KO assigned   (GenBank) hypothetical protein.</a>                                                           | Hypothetical                | 13.627   | 15.657   | 17.941   | 316.649  | 48.703   | 202.183  |
| <a href="#">AMK58_18960</a> | <a href="#">K01847 methylmalonyl-CoA mutase [EC:5.4.99.2]   (GenBank) methylmalonyl-CoA mutase.</a>                        | Metabolism                  | 11.523   | 16.455   | 14.858   | 229.123  | 27.989   | 91.838   |
| <a href="#">AMK58_18965</a> | <a href="#">K03523 biotin transport system substrate-specific component   (GenBank) biotin transporter BioY.</a>           | Membrane transport          | 92.709   | 77.158   | 86.175   | 270.619  | 66.880   | 151.190  |
| <a href="#">AMK58_18970</a> | <a href="#">K01965 propionyl-CoA carboxylase alpha chain [EC:6.4.1.3]   (GenBank) acetylpropionyl-CoA carboxylase.</a>     | Metabolism                  | 507.231  | 424.398  | 412.207  | 139.896  | 114.533  | 231.777  |
| <a href="#">AMK58_18975</a> | <a href="#">K01966 propionyl-CoA carboxylase beta chain [EC:6.4.1.3]   (GenBank) methylmalonyl-CoA carboxylase.</a>        | Metabolism                  | 313.547  | 297.269  | 345.432  | 104.633  | 88.687   | 68.329   |
| <a href="#">AMK58_18980</a> | <a href="#">K07110 uncharacterized protein   (GenBank) Cro/C1 family transcriptional regulator.</a>                        | Transcription               | 630.775  | 504.701  | 494.082  | 194.645  | 222.877  | 325.264  |
| <a href="#">AMK58_18985</a> | <a href="#">K01779 aspartate racemase [EC:5.1.1.13]   (GenBank) aspartate racemase.</a>                                    | enzyme                      | 1062.768 | 852.349  | 851.943  | 233.156  | 556.507  | 461.245  |
| <a href="#">AMK58_18990</a> | <a href="#">K14233 tRNA-Ser1   (GenBank) tRNA-Ser.</a>                                                                     | tRNA synthesis/modification | 233.133  | 215.468  | 258.405  | 2489.726 | 870.128  | 3249.849 |
| <a href="#">AMK58_18995</a> | <a href="#">no KO assigned   (GenBank) hypothetical protein.</a>                                                           | Hypothetical                | 238.010  | 213.297  | 261.231  | 518.440  | 391.413  | 549.834  |
| <a href="#">AMK58_19000</a> | <a href="#">no KO assigned   (GenBank) PAS domain-containing sensor histidine kinase.</a>                                  | Signal Transduction         | 1.480    | 1.360    | 1.840    | 8.006    | 29.885   | 23.172   |
| <a href="#">AMK58_19005</a> | <a href="#">K02434 aspartyl-tRNA(Asn)/glutamyl-tRNA(Gln) amidotransferase subunit B [EC:6.3.5.6.3.5.7]   (GenB).</a>       | tRNA synthesis/modification | 14.759   | 14.447   | 18.394   | 25.467   | 2.718    | 38.583   |
| <a href="#">AMK58_19010</a> | <a href="#">K02433 aspartyl-tRNA(Asn)/glutamyl-tRNA(Gln) amidotransferase subunit A [EC:6.3.5.6.3.5.7]   (GenB).</a>       | tRNA synthesis/modification | 91.174   | 93.226   | 85.990   | 173.130  | 79.617   | 289.007  |
| <a href="#">AMK58_19015</a> | <a href="#">K02435 aspartyl-tRNA(Asn)/glutamyl-tRNA(Gln) amidotransferase subunit C [EC:6.3.5.6.3.5.7]   (GenB).</a>       | tRNA synthesis/modification | 2106.197 | 2147.462 | 1941.033 | 369.987  | 1067.008 | 1057.986 |
| <a href="#">AMK58_19020</a> | <a href="#">no KO assigned   (GenBank) acetyltransferase.</a>                                                              | Acetyltransferase           | 794.609  | 704.602  | 720.133  | 378.133  | 532.276  | 391.904  |
| <a href="#">AMK58_19025</a> | <a href="#">K07447 putative holliday junction resolvase [EC:3.1.-.-1]   (GenBank) Holliday junction resolvase.</a>         | DNA Repair and Replication  | 200.496  | 170.201  | 172.165  | 36.716   | 156.956  | 141.288  |
| <a href="#">AMK58_19030</a> | <a href="#">K07088 uncharacterized protein   (GenBank) hypothetical protein.</a>                                           | Hypothetical                | 10.675   | 5.445    | 13.121   | 87.894   | 56.779   | 168.646  |
| <a href="#">AMK58_19035</a> | <a href="#">no KO assigned   (GenBank) hypothetical protein.</a>                                                           | Hypothetical                | 65.662   | 74.632   | 79.487   | 110.055  | 60.306   | 192.611  |
| <a href="#">AMK58_19040</a> | <a href="#">no KO assigned   (GenBank) aldehyde-activating protein.</a>                                                    | Metabolism                  | 39.773   | 45.428   | 58.950   | 460.310  | 298.813  | 347.114  |
| <a href="#">AMK58_19045</a> | <a href="#">no KO assigned   (GenBank) aldehyde-activating protein.</a>                                                    | Metabolism                  | 302.821  | 328.943  | 402.789  | 127.457  | 656.732  | 363.823  |
| <a href="#">AMK58_19050</a> | <a href="#">no KO assigned   (GenBank) hypothetical protein.</a>                                                           | Hypothetical                | 1352.294 | 1582.996 | 1994.839 | 110.474  | 1507.544 | 265.759  |
| <a href="#">AMK58_19055</a> | <a href="#">K03566 LysR family transcriptional regulator, glycine cleavage system transcriptional activator   (G).</a>     | Transcription               | 468.816  | 553.511  | 593.333  | 59.502   | 547.226  | 86.026   |
| <a href="#">AMK58_19060</a> | <a href="#">no KO assigned   (GenBank) hypothetical protein.</a>                                                           | Hypothetical                | 560.946  | 613.940  | 786.807  | 186.718  | 599.649  | 104.093  |
| <a href="#">AMK58_19065</a> | <a href="#">no KO assigned   (GenBank) hypothetical protein.</a>                                                           | Hypothetical                | 25.552   | 38.522   | 29.745   | 202.492  | 80.797   | 321.751  |
| <a href="#">AMK58_19070</a> | <a href="#">K00609 aspartate carbamoyltransferase catalytic subunit [EC:2.1.3.2]   (GenBank) pyrB: aspartate car.</a>      | Metabolism                  | 28.917   | 35.304   | 31.200   | 181.346  | 144.996  | 59.457   |
| <a href="#">AMK58_19075</a> | <a href="#">K01465 dihydroorotase [EC:3.5.2.3]   (GenBank) dihydroorotase.</a>                                             | Metabolism: Nucleotide      | 6.031    | 5.543    | 7.410    | 143.917  | 85.097   | 51.188   |
| <a href="#">AMK58_19080</a> | <a href="#">K08591 glycerol-3-phosphate acyltransferase PlsY [EC:2.3.1.15]   (GenBank) glycerol-3-phosphate acyl.</a>      | Lipid metabolism            | 471.458  | 450.575  | 413.769  | 181.572  | 266.917  | 305.434  |
| <a href="#">AMK58_19085</a> | <a href="#">K03413 two-component system, chemotaxis family, response regulator CheY   (GenBank) hypothetical pro.</a>      | Chemotaxis                  | 680.810  | 626.457  | 688.921  | 862.465  | 391.321  | 794.282  |
| <a href="#">AMK58_19090</a> | <a href="#">no KO assigned   (GenBank) restriction endonuclease subunit R.</a>                                             | DNA Repair and Replication  | 27.965   | 26.748   | 25.047   | 37.461   | 28.590   | 35.438   |

|                             |                                                                                                                       |                                     |          |          |          |          |          |         |
|-----------------------------|-----------------------------------------------------------------------------------------------------------------------|-------------------------------------|----------|----------|----------|----------|----------|---------|
| <a href="#">AMK58_19095</a> | <a href="#">no KO assigned   (GenBank) cupin</a>                                                                      | No COG                              | 146.904  | 188.072  | 184.190  | 107.583  | 203.233  | 210.319 |
| <a href="#">AMK58_19100</a> | <a href="#">no KO assigned   (GenBank) hypothetical protein</a>                                                       | Hypothetical                        | 10.378   | 24.112   | 30.424   | 1112.904 | 225.202  | 716.655 |
| <a href="#">AMK58_19105</a> | <a href="#">K07038 inner membrane protein   (GenBank) metal-dependent hydrolase</a>                                   | Membrane                            | 68.498   | 59.727   | 57.031   | 32.735   | 23.723   | 166.345 |
| <a href="#">AMK58_19110</a> | <a href="#">no KO assigned   (GenBank) hypothetical protein</a>                                                       | Hypothetical                        | 11.027   | 12.549   | 9.843    | 26.428   | 9.275    | 28.102  |
| <a href="#">AMK58_19115</a> | <a href="#">K13483 xanthine dehydrogenase YaeT iron-sulfur-binding subunit   (GenBank) oxidoreductase</a>             | Metabolism: Nucleotide              | 74.854   | 78.128   | 91.752   | 151.313  | 210.602  | 309.212 |
| <a href="#">AMK58_19120</a> | <a href="#">K11178 xanthine dehydrogenase YaeS FAD-binding subunit   (GenBank) FAD-binding mo</a>                     | Metabolism: Nucleotide              | 181.067  | 245.463  | 237.037  | 191.896  | 102.717  | 258.703 |
| <a href="#">AMK58_19125</a> | <a href="#">K11177 xanthine dehydrogenase YaeR molybdenum-binding subunit   (GenBank) aldehyde</a>                    | Metabolism: Nucleotide              | 0.593    | 0.644    | 1.178    | 39.626   | 17.201   | 45.867  |
| <a href="#">AMK58_19130</a> | <a href="#">K03387 alkyl hydroperoxide reductase subunit F   (GenBank) alkyl hydroperoxide reductas</a>               | Oxidoreductase                      | 0.842    | 1.373    | 2.913    | 117.972  | 17.388   | 74.491  |
| <a href="#">AMK58_19135</a> | <a href="#">K03386 peroxiredoxin (alkyl hydroperoxide reductase subunit C)   (GenBank) alkyl hydr</a>                 | Oxidoreductase                      | 30.913   | 38.476   | 42.659   | 623.725  | 316.344  | 899.551 |
| <a href="#">AMK58_19140</a> | <a href="#">K04761 LysR family transcriptional regulator, hydrogen peroxide-inducible genes activator   (GenBank)</a> | Transcription                       | 255.687  | 228.269  | 257.063  | 287.427  | 351.681  | 321.324 |
| <a href="#">AMK58_19145</a> | <a href="#">no KO assigned   (GenBank) transcriptional regulator</a>                                                  | Transcription                       | 3692.450 | 3155.622 | 3271.559 | 114.032  | 734.755  | 371.574 |
| <a href="#">AMK58_19150</a> | <a href="#">K02048 sulfate transport system substrate-binding protein   (GenBank) ABC transporter permease</a>        | Energy                              | 66.192   | 79.662   | 82.745   | 174.944  | 59.148   | 155.433 |
| <a href="#">AMK58_19155</a> | <a href="#">K00220 cyclohexadieny/prephenate dehydrogenase   (GenBank) cyclohexadieny   de</a>                        | Metabolism                          | 8.369    | 8.871    | 11.294   | 93.298   | 30.496   | 83.608  |
| <a href="#">AMK58_19160</a> | <a href="#">K00817 histidinol-phosphate aminotransferase   (GenBank) histidinol-phosphate aminotran</a>               | Metabolism: Amino Acid              | 5.639    | 5.285    | 7.359    | 149.892  | 52.200   | 237.150 |
| <a href="#">AMK58_19165</a> | <a href="#">no KO assigned   (GenBank) chorismate mutase</a>                                                          | Metabolism                          | 44.196   | 32.413   | 46.299   | 136.307  | 31.235   | 208.098 |
| <a href="#">AMK58_19170</a> | <a href="#">K00641 homoserine O-acetyltransferase   (GenBank) metX: homoserine O-acetyltransferase</a>                | Metabolism: Amino Acid              | 186.907  | 185.017  | 189.110  | 146.931  | 103.305  | 174.981 |
| <a href="#">AMK58_19175</a> | <a href="#">no KO assigned   (GenBank) methionine biosynthesis protein MetW</a>                                       | Biosynthesis: Amino Acid            | 190.074  | 170.005  | 204.774  | 293.977  | 127.104  | 218.848 |
| <a href="#">AMK58_19180</a> | <a href="#">no KO assigned   (GenBank) hypothetical protein</a>                                                       | Hypothetical                        | 115.764  | 98.985   | 109.262  | 376.726  | 212.496  | 302.340 |
| <a href="#">AMK58_19185</a> | <a href="#">K07002 uncharacterized protein   (GenBank) alpha/beta hydrolase</a>                                       | hydrolase                           | 38.856   | 50.019   | 36.536   | 221.424  | 146.952  | 214.984 |
| <a href="#">AMK58_19190</a> | <a href="#">no KO assigned   (GenBank) methyltransferase type 11</a>                                                  | methyltransferase                   | 4.519    | 3.724    | 6.963    | 94.974   | 116.651  | 52.595  |
| <a href="#">AMK58_19195</a> | <a href="#">K01069 hydroxyacetylglutathione hydrolase   (GenBank) hydroxyacetylglutathione hydrolase</a>              | Metabolism: Carbohydrate            | 60.855   | 67.399   | 75.537   | 129.834  | 202.890  | 47.295  |
| <a href="#">AMK58_19200</a> | <a href="#">no KO assigned   (GenBank) glutathione S-transferase</a>                                                  | Transferase                         | 299.690  | 352.129  | 298.815  | 354.614  | 578.059  | 136.539 |
| <a href="#">AMK58_19205</a> | <a href="#">K09705 uncharacterized protein   (GenBank) cupin</a>                                                      | No COG                              | 186.833  | 185.476  | 167.982  | 463.874  | 389.246  | 392.028 |
| <a href="#">AMK58_19210</a> | <a href="#">no KO assigned   (GenBank) hypothetical protein</a>                                                       | Hypothetical                        | 95.158   | 113.241  | 97.220   | 118.315  | 54.785   | 67.075  |
| <a href="#">AMK58_19215</a> | <a href="#">no KO assigned   (GenBank) hypothetical protein</a>                                                       | Hypothetical                        | 77.864   | 65.605   | 83.254   | 143.274  | 80.309   | 112.402 |
| <a href="#">AMK58_19220</a> | <a href="#">no KO assigned   (GenBank) hypothetical protein</a>                                                       | Hypothetical                        | 67.808   | 70.031   | 84.646   | 394.334  | 91.896   | 237.060 |
| <a href="#">AMK58_19225</a> | <a href="#">no KO assigned   (GenBank) hypothetical protein</a>                                                       | Hypothetical                        | 32.422   | 48.425   | 44.474   | 232.082  | 62.068   | 229.080 |
| <a href="#">AMK58_19230</a> | <a href="#">K01486 adenine deaminase   (GenBank) adenosine deaminase</a>                                              | Metabolism: Nucleotide              | 35.756   | 44.840   | 44.432   | 76.256   | 37.565   | 67.165  |
| <a href="#">AMK58_19235</a> | <a href="#">no KO assigned   (GenBank) hypothetical protein</a>                                                       | Hypothetical                        | 327.030  | 419.087  | 393.780  | 278.891  | 207.380  | 441.059 |
| <a href="#">AMK58_19240</a> | <a href="#">K03406 methyl-accepting chemotaxis protein   (GenBank) hypothetical protein</a>                           | Chemotaxis                          | 119.894  | 131.359  | 114.558  | 166.633  | 303.120  | 203.194 |
| <a href="#">AMK58_19245</a> | <a href="#">K06282 hydrogenase small subunit   (GenBank) hydrogenase 2 small subunit</a>                              | Metabolism                          | 15.564   | 26.933   | 14.084   | 49.461   | 10.979   | 127.498 |
| <a href="#">AMK58_19250</a> | <a href="#">no KO assigned   (GenBank) hydrogenase 2 protein HvbA</a>                                                 | hydrogenase                         | 230.226  | 264.408  | 247.135  | 295.191  | 32.090   | 303.638 |
| <a href="#">AMK58_19255</a> | <a href="#">no KO assigned   (GenBank) hydrogenase</a>                                                                | hydrogenase                         | 54.929   | 63.881   | 61.895   | 110.371  | 15.318   | 150.471 |
| <a href="#">AMK58_19260</a> | <a href="#">K06281 hydrogenase large subunit   (GenBank) hydrogenase 2 large subunit</a>                              | Metabolism                          | 10.658   | 11.037   | 14.457   | 79.094   | 12.140   | 77.614  |
| <a href="#">AMK58_19265</a> | <a href="#">K03605 hydrogenase maturation protease   (GenBank) hvdD: hydrogenase 2 maturation endo</a>                | Peptidase                           | 93.833   | 102.475  | 107.205  | 221.992  | 56.138   | 475.977 |
| <a href="#">AMK58_19270</a> | <a href="#">no KO assigned   (GenBank) MBL fold metallo-hydrolase</a>                                                 | hydrolase                           | 70.958   | 75.574   | 87.628   | 174.935  | 32.364   | 314.355 |
| <a href="#">AMK58_19275</a> | <a href="#">no KO assigned   (GenBank) MBL fold metallo-hydrolase</a>                                                 | hydrolase                           | 36.250   | 38.261   | 43.888   | 75.590   | 9.100    | 100.169 |
| <a href="#">AMK58_19280</a> | <a href="#">K03192 urease accessory protein   (GenBank) urease accessory protein</a>                                  | Enzyme                              | 410.610  | 386.269  | 415.230  | 475.799  | 37.691   | 260.659 |
| <a href="#">AMK58_19285</a> | <a href="#">K04653 hydrogenase expression/formation protein HvpC   (GenBank) hydrogenase</a>                          | hydrogenase                         | 90.030   | 105.986  | 117.649  | 909.548  | 74.776   | 778.074 |
| <a href="#">AMK58_19290</a> | <a href="#">no KO assigned   (GenBank) hypothetical protein</a>                                                       | Hypothetical                        | 141.771  | 129.833  | 136.765  | 224.565  | 29.661   | 89.080  |
| <a href="#">AMK58_19295</a> | <a href="#">no KO assigned   (GenBank) hypothetical protein</a>                                                       | Hypothetical                        | 5.899    | 4.946    | 4.624    | 33.685   | 2.559    | 35.408  |
| <a href="#">AMK58_19300</a> | <a href="#">K04651 hydrogenase nickel incorporation protein HvpA/HvbF   (GenBank) hydrogenase nickel incorporati</a>  | Chaperone                           | 14.161   | 12.690   | 20.196   | 390.764  | 23.080   | 220.272 |
| <a href="#">AMK58_19305</a> | <a href="#">K04652 hydrogenase nickel incorporation protein HvpB   (GenBank) hydrogenase nickel incorporation pr</a>  | Chaperone                           | 2.956    | 4.607    | 3.544    | 194.210  | 6.501    | 34.563  |
| <a href="#">AMK58_19310</a> | <a href="#">no KO assigned   (GenBank) hypothetical protein</a>                                                       | Hypothetical                        | 8.705    | 8.274    | 8.653    | 98.849   | 13.787   | 69.160  |
| <a href="#">AMK58_19315</a> | <a href="#">K04656 hydrogenase maturation protein HvpF   (GenBank) carbamoyltransferase</a>                           | enzyme                              | 17.670   | 15.628   | 15.430   | 40.189   | 9.481    | 82.222  |
| <a href="#">AMK58_19320</a> | <a href="#">K04653 hydrogenase expression/formation protein HvpC   (GenBank) hydrogenase assembly protein HvpI</a>    | No COG                              | 48.430   | 87.405   | 72.909   | 379.109  | 27.219   | 401.832 |
| <a href="#">AMK58_19325</a> | <a href="#">K04655 hydrogenase expression/formation protein HvpE   (GenBank) hydrogenase expression/formation p</a>   | No COG                              | 8.095    | 11.054   | 13.414   | 340.017  | 17.548   | 233.225 |
| <a href="#">AMK58_19330</a> | <a href="#">no KO assigned   (GenBank) hypothetical protein</a>                                                       | Hypothetical                        | 3.014    | 7.003    | 2.229    | 41.724   | 6.400    | 34.473  |
| <a href="#">AMK58_19335</a> | <a href="#">K03797 carboxyl-terminal processing protease   (GenBank) carboxyl-terminal protease</a>                   | Peptidase                           | 4.846    | 5.491    | 6.197    | 126.592  | 12.022   | 98.633  |
| <a href="#">AMK58_19340</a> | <a href="#">K03704 cold shock protein (beta-ribon, CspA family)   (GenBank) cold-shock protein</a>                    | Stress Response                     | 6.482    | 13.743   | 18.888   | 210.926  | 68.164   | 279.802 |
| <a href="#">AMK58_19345</a> | <a href="#">K09858 SEC-C motif domain protein   (GenBank) hypothetical protein</a>                                    | Secretion system                    | 735.687  | 864.250  | 896.448  | 513.914  | 867.662  | 546.920 |
| <a href="#">AMK58_19350</a> | <a href="#">no KO assigned   (GenBank) cAMP-binding protein</a>                                                       | cyclic nucleotide                   | 1037.161 | 882.550  | 833.686  | 63.246   | 1092.949 | 108.946 |
| <a href="#">AMK58_19355</a> | <a href="#">K03470 ribonuclease HII   (GenBank) ribonuclease HII</a>                                                  | DNA Repair and Replication          | 110.851  | 81.444   | 92.607   | 100.195  | 36.090   | 194.268 |
| <a href="#">AMK58_19360</a> | <a href="#">K13581 modification methylase   (GenBank) modification methylase</a>                                      | Defense                             | 24.973   | 32.638   | 32.225   | 187.425  | 21.554   | 126.846 |
| <a href="#">AMK58_19365</a> | <a href="#">K01633 dihydroneopterin aldolase / 7,8-dihydroneopterin epimerase   (GenBank)</a>                         | Metabolism: Co-Factors and Vitamins | 23.021   | 22.074   | 29.726   | 165.993  | 27.155   | 194.232 |
| <a href="#">AMK58_19370</a> | <a href="#">no KO assigned   (GenBank) hypothetical protein</a>                                                       | Hypothetical                        | 106.821  | 76.734   | 75.604   | 62.524   | 13.322   | 62.937  |
| <a href="#">AMK58_19375</a> | <a href="#">no KO assigned   (GenBank) hypothetical protein</a>                                                       | Hypothetical                        | 69.976   | 86.530   | 84.947   | 106.380  | 56.157   | 89.031  |
| <a href="#">AMK58_19380</a> | <a href="#">K03575 A/G-specific adenine glycosylase   (GenBank) A/G-specific adenine glycosylase</a>                  | DNA Repair and Replication          | 34.433   | 44.083   | 55.380   | 429.800  | 113.223  | 395.587 |
| <a href="#">AMK58_19385</a> | <a href="#">no KO assigned   (GenBank) hypothetical protein</a>                                                       | Hypothetical                        | 23.963   | 24.112   | 38.613   | 224.695  | 130.706  | 410.954 |
| <a href="#">AMK58_19390</a> | <a href="#">no KO assigned   (GenBank) disulfide bond formation protein DsbA</a>                                      | Cell Cycle/Shape/Homeostasis        | 15.202   | 18.381   | 26.844   | 454.557  | 117.581  | 240.818 |
| <a href="#">AMK58_19395</a> | <a href="#">K03529 chromosome segregation protein   (GenBank) chromosome partitioning protein ParA</a>                | Cell Cycle/Shape/Homeostasis        | 9.373    | 10.447   | 11.538   | 36.354   | 26.417   | 41.023  |
| <a href="#">AMK58_19400</a> | <a href="#">K19746 D-arginine dehydrogenase   (GenBank) FAD-dependent oxidoreductase</a>                              | Metabolism: Amino Acid              | 229.012  | 219.769  | 203.357  | 73.350   | 44.065   | 143.553 |
| <a href="#">AMK58_19405</a> | <a href="#">no KO assigned   (GenBank) hypothetical protein</a>                                                       | Hypothetical                        | 186.465  | 235.014  | 224.652  | 1049.418 | 162.795  | 701.093 |
| <a href="#">AMK58_19410</a> | <a href="#">K07275 outer membrane protein   (GenBank) hypothetical protein</a>                                        | Membrane                            | 117.264  | 129.355  | 126.647  | 250.124  | 100.269  | 122.549 |
| <a href="#">AMK58_19415</a> | <a href="#">no KO assigned   (GenBank) inosine-5-monophosphate dehydrogenase</a>                                      | dehydrogenase                       | 79.047   | 91.459   | 86.273   | 129.749  | 118.573  | 253.962 |
| <a href="#">AMK58_19420</a> | <a href="#">no KO assigned   (GenBank) two-component system response regulator</a>                                    | Signal Transduction                 | 2363.305 | 2637.724 | 2353.602 | 107.118  | 143.689  | 245.949 |
| <a href="#">AMK58_19425</a> | <a href="#">no KO assigned   (GenBank) acyl-CoA dehydrogenase</a>                                                     | dehydrogenase                       | 162.785  | 234.656  | 189.230  | 60.582   | 62.917   | 62.874  |

|                             |                                                                                                                                                                                                                        |                              |          |          |          |          |          |          |
|-----------------------------|------------------------------------------------------------------------------------------------------------------------------------------------------------------------------------------------------------------------|------------------------------|----------|----------|----------|----------|----------|----------|
| <a href="#">AMK58_19430</a> | <a href="#">K07516 3-hydroxyacyl-CoA dehydrogenase [EC:1.1.1.35] (GenBank) 3-hydroxyacyl-CoA dehydrogenase</a>                                                                                                         | Metabolism: Carbon           | 554.226  | 634.718  | 564.744  | 18.831   | 151.487  | 68.256   |
| <a href="#">AMK58_19435</a> | <a href="#">no KO assigned (GenBank) acetyl-CoA acetyltransferase</a>                                                                                                                                                  | Acetyltransferase            | 687.235  | 522.009  | 652.637  | 204.126  | 182.159  | 412.716  |
| <a href="#">AMK58_19440</a> | <a href="#">no KO assigned (GenBank) transcriptional regulator</a>                                                                                                                                                     | Transcription                | 2040.334 | 1832.203 | 2060.534 | 857.983  | 805.358  | 888.224  |
| <a href="#">AMK58_19445</a> | <a href="#">no KO assigned (GenBank) hypothetical protein</a>                                                                                                                                                          | Hypothetical                 | 2235.583 | 2039.626 | 2303.637 | 988.182  | 1633.118 | 679.753  |
| <a href="#">AMK58_19450</a> | <a href="#">K06894 uncharacterized protein (GenBank) alpha-2-macroglobulin</a>                                                                                                                                         | No COG                       | 25.554   | 12.933   | 11.711   | 20.265   | 56.719   | 14.789   |
| <a href="#">AMK58_19455</a> | <a href="#">no KO assigned (GenBank) histidine kinase</a>                                                                                                                                                              | Signal Transduction          | 18.730   | 22.646   | 17.455   | 12.047   | 26.483   | 37.768   |
| <a href="#">AMK58_19460</a> | <a href="#">no KO assigned (GenBank) aminotransferase</a>                                                                                                                                                              | transferase                  | 301.487  | 276.309  | 312.792  | 879.457  | 185.504  | 379.087  |
| <a href="#">AMK58_19465</a> | <a href="#">no KO assigned (GenBank) pseudogene</a>                                                                                                                                                                    | Pseudogene                   | 139.012  | 149.025  | 153.492  | 502.326  | 154.995  | 769.255  |
| <a href="#">AMK58_19470</a> | <a href="#">K02409 flagellar M-ring protein FliF (GenBank) flagellar M-ring protein FliF</a>                                                                                                                           | Motility                     | 53.229   | 35.625   | 42.383   | 67.797   | 53.702   | 155.762  |
| <a href="#">AMK58_19475</a> | <a href="#">K02411 flagellar assembly protein FliH (GenBank) flagellar assembly protein FliH</a>                                                                                                                       | Motility                     | 107.256  | 85.377   | 128.856  | 193.950  | 273.422  | 172.263  |
| <a href="#">AMK58_19480</a> | <a href="#">K02417 flagellar motor switch protein FliN/FliY (GenBank) flagellar motor switch protein FliN</a>                                                                                                          | Motility                     | 988.411  | 1095.993 | 987.581  | 570.108  | 91.141   | 1086.975 |
| <a href="#">AMK58_19485</a> | <a href="#">K02556 chemotaxis protein MotA (GenBank) flagellar motor protein MotA</a>                                                                                                                                  | Chemotaxis                   | 71.360   | 111.799  | 88.165   | 251.416  | 12.244   | 114.860  |
| <a href="#">AMK58_19490</a> | <a href="#">no KO assigned (GenBank) AAA family ATPase</a>                                                                                                                                                             | Enzyme                       | 41.381   | 38.071   | 41.515   | 18.126   | 6.190    | 30.201   |
| <a href="#">AMK58_19495</a> | <a href="#">K02400 flagellar biosynthesis protein FliA (GenBank) fliA: flagellar biosynthesis protein FliA</a>                                                                                                         | Motility                     | 25.917   | 23.410   | 28.101   | 41.315   | 10.697   | 26.316   |
| <a href="#">AMK58_19500</a> | <a href="#">K02404 flagellar biosynthesis protein FliF (GenBank) GTPase</a>                                                                                                                                            | Motility                     | 179.446  | 197.526  | 197.610  | 189.217  | 38.701   | 216.505  |
| <a href="#">AMK58_19505</a> | <a href="#">K04562 flagellar biosynthesis protein FliG (GenBank) cobyrinic acid a,c-diamide synthase</a>                                                                                                               | Motility                     | 192.501  | 224.741  | 197.657  | 217.268  | 96.207   | 456.705  |
| <a href="#">AMK58_19510</a> | <a href="#">no KO assigned (GenBank) hypothetical protein</a>                                                                                                                                                          | Hypothetical                 | 21.606   | 30.618   | 25.803   | 91.976   | 25.333   | 87.645   |
| <a href="#">AMK58_19515</a> | <a href="#">no KO assigned (GenBank) hypothetical protein</a>                                                                                                                                                          | Hypothetical                 | 158.431  | 135.505  | 130.024  | 348.945  | 94.103   | 276.190  |
| <a href="#">AMK58_19520</a> | <a href="#">no KO assigned (GenBank) hypothetical protein</a>                                                                                                                                                          | Hypothetical                 | 99.166   | 175.672  | 166.648  | 1922.289 | 320.791  | 903.504  |
| <a href="#">AMK58_19525</a> | <a href="#">no KO assigned (GenBank) hypothetical protein</a>                                                                                                                                                          | Hypothetical                 | 5.272    | 8.689    | 4.753    | 46.026   | 14.304   | 56.641   |
| <a href="#">AMK58_19530</a> | <a href="#">no KO assigned (GenBank) hypothetical protein</a>                                                                                                                                                          | Hypothetical                 | 51.692   | 59.454   | 39.424   | 69.614   | 21.439   | 152.769  |
| <a href="#">AMK58_19535</a> | <a href="#">K02412 flagellum-specific ATP synthase [EC:3.6.3.14] (GenBank) fliI: flagellar protein export ATPase</a>                                                                                                   | Motility                     | 82.424   | 73.034   | 67.430   | 102.465  | 52.942   | 188.950  |
| <a href="#">AMK58_19540</a> | <a href="#">K13584 two-component system, cell cycle response regulator CtrA (GenBank) two-component system response regulator CtrA</a>                                                                                 | Cell Cycle/Shape/Homeostasis | 32.254   | 30.634   | 29.881   | 32.349   | 12.828   | 67.331   |
| <a href="#">AMK58_19545</a> | <a href="#">no KO assigned (GenBank) hypothetical protein</a>                                                                                                                                                          | Hypothetical                 | 352.639  | 458.520  | 519.608  | 1383.454 | 334.655  | 1217.175 |
| <a href="#">AMK58_19550</a> | <a href="#">K03566 LysR family transcriptional regulator, glycine cleavage system transcriptional activator I (GenBank) LysR family transcriptional regulator, glycine cleavage system transcriptional activator I</a> | Transcription                | 1931.049 | 2072.661 | 1871.763 | 88.074   | 1258.937 | 214.626  |
| <a href="#">AMK58_19555</a> | <a href="#">K00575 chemotaxis protein methyltransferase CheR [EC:2.1.1.80] (GenBank) chemotaxis protein CheR</a>                                                                                                       | Chemotaxis                   | 68.266   | 95.763   | 71.303   | 67.482   | 111.963  | 80.818   |
| <a href="#">AMK58_19560</a> | <a href="#">K03412 two-component system, chemotaxis family, response regulator CheB [EC:3.1.1.61] (GenBank) two-component system, chemotaxis family, response regulator CheB</a>                                       | Chemotaxis                   | 49.046   | 54.531   | 60.958   | 114.311  | 220.642  | 179.060  |
| <a href="#">AMK58_19565</a> | <a href="#">K03413 two-component system, chemotaxis family, response regulator CheY (GenBank) two-component system, chemotaxis family, response regulator CheY</a>                                                     | Chemotaxis                   | 484.961  | 686.135  | 566.159  | 312.850  | 460.337  | 545.397  |
| <a href="#">AMK58_19570</a> | <a href="#">K03408 purine-binding chemotaxis protein CheW (GenBank) chemotaxis protein CheW</a>                                                                                                                        | Chemotaxis                   | 367.333  | 440.366  | 449.446  | 247.973  | 240.404  | 322.915  |
| <a href="#">AMK58_19575</a> | <a href="#">K03407 two-component system, chemotaxis family, sensor kinase CheA [EC:2.7.13.3] (GenBank) ATPase</a>                                                                                                      | Chemotaxis                   | 78.353   | 74.271   | 72.168   | 8.854    | 17.467   | 23.258   |
| <a href="#">AMK58_19580</a> | <a href="#">K13588 histidine phosphotransferase ChpT (GenBank) hypothetical protein</a>                                                                                                                                | Signal Transduction          | 421.423  | 387.031  | 431.490  | 112.996  | 77.489   | 103.596  |
| <a href="#">AMK58_19585</a> | <a href="#">no KO assigned (GenBank) hypothetical protein</a>                                                                                                                                                          | Hypothetical                 | 7030.939 | 8008.297 | 7954.530 | 2080.942 | 1482.152 | 2884.656 |
| <a href="#">AMK58_19590</a> | <a href="#">K08738 cytochrome c (GenBank) hypothetical protein</a>                                                                                                                                                     | Energy                       | 427.360  | 469.153  | 484.273  | 311.380  | 265.505  | 342.321  |
| <a href="#">AMK58_19595</a> | <a href="#">K01434 penicillin amidase [EC:3.5.1.11] (GenBank) acyl-homoserine-lactone acylase</a>                                                                                                                      | Defense                      | 7.001    | 7.171    | 8.179    | 6.029    | 8.601    | 10.480   |
| <a href="#">AMK58_19600</a> | <a href="#">K01754 threonine dehydratase [EC:4.3.1.19] (GenBank) threonine dehydratase</a>                                                                                                                             | Metabolism                   | 10.381   | 15.070   | 13.744   | 93.439   | 17.012   | 58.024   |
| <a href="#">AMK58_19605</a> | <a href="#">no KO assigned (GenBank) flavin reductase</a>                                                                                                                                                              | No COG                       | 102.730  | 121.290  | 133.491  | 943.955  | 366.214  | 593.101  |
| <a href="#">AMK58_19610</a> | <a href="#">K02557 chemotaxis protein MotB (GenBank) chemotaxis protein MotB</a>                                                                                                                                       | Chemotaxis                   | 27.248   | 34.056   | 40.541   | 277.029  | 67.790   | 107.830  |
| <a href="#">AMK58_19615</a> | <a href="#">no KO assigned (GenBank) hypothetical protein</a>                                                                                                                                                          | Hypothetical                 | 45.201   | 38.579   | 46.508   | 32.870   | 33.660   | 75.296   |
| <a href="#">AMK58_19620</a> | <a href="#">no KO assigned (GenBank) hypothetical protein</a>                                                                                                                                                          | Hypothetical                 | 87.154   | 82.099   | 98.051   | 246.098  | 48.008   | 200.088  |
| <a href="#">AMK58_19625</a> | <a href="#">K00685 arginine-tRNA-protein transferase [EC:2.3.2.81] (GenBank) arginyl-tRNA-protein transferase</a>                                                                                                      | tRNA synthesis/modification  | 885.267  | 893.212  | 824.475  | 168.314  | 167.132  | 495.290  |
| <a href="#">AMK58_19630</a> | <a href="#">no KO assigned (GenBank) sugar transporter</a>                                                                                                                                                             | Transport: Sugar             | 710.530  | 647.001  | 646.585  | 211.442  | 144.662  | 454.900  |
| <a href="#">AMK58_19635</a> | <a href="#">no KO assigned (GenBank) C4-dicarboxylate ABC transporter</a>                                                                                                                                              | Membrane Transport           | 88.724   | 100.466  | 84.131   | 68.865   | 42.394   | 121.848  |
| <a href="#">AMK58_19640</a> | <a href="#">no KO assigned (GenBank) ABC transporter substrate-binding protein</a>                                                                                                                                     | Membrane Transport           | 821.169  | 664.723  | 645.316  | 26.883   | 97.546   | 92.229   |
| <a href="#">AMK58_19645</a> | <a href="#">K02621 topoisomerase IV subunit A [EC:5.99.1.-] (GenBank) DNA topoisomerase IV subunit A</a>                                                                                                               | DNA Repair and Replication   | 654.316  | 470.770  | 555.622  | 78.772   | 39.611   | 156.663  |
| <a href="#">AMK58_19650</a> | <a href="#">K03584 DNA repair protein RecO (recombination protein O) (GenBank) DNA repair protein RecO</a>                                                                                                             | DNA Repair and Replication   | 258.393  | 241.119  | 251.096  | 126.070  | 45.553   | 444.420  |
| <a href="#">AMK58_19655</a> | <a href="#">no KO assigned (GenBank) diguanylate cyclase</a>                                                                                                                                                           | cyclic nucleotide            | 173.170  | 159.788  | 176.314  | 105.998  | 119.656  | 199.828  |
| <a href="#">AMK58_19660</a> | <a href="#">no KO assigned (GenBank) hypothetical protein</a>                                                                                                                                                          | Hypothetical                 | 39.412   | 41.442   | 46.467   | 348.446  | 214.418  | 225.416  |
| <a href="#">AMK58_19665</a> | <a href="#">no KO assigned (GenBank) hypothetical protein</a>                                                                                                                                                          | Hypothetical                 | 459.481  | 598.639  | 532.590  | 747.546  | 531.337  | 1083.983 |
| <a href="#">AMK58_19670</a> | <a href="#">K03446 MFS transporter, DHA2 family, multidrug resistance protein (GenBank) MFS transporter</a>                                                                                                            | Transport: MFS               | 12.211   | 14.211   | 12.062   | 15.613   | 54.188   | 51.687   |
| <a href="#">AMK58_19675</a> | <a href="#">K03543 membrane fusion protein, multidrug efflux system (GenBank) hemolysin D</a>                                                                                                                          | Transport                    | 38.165   | 30.140   | 37.747   | 45.982   | 97.016   | 86.338   |
| <a href="#">AMK58_19680</a> | <a href="#">no KO assigned (GenBank) transcriptional regulator</a>                                                                                                                                                     | Transcription                | 110.547  | 99.010   | 122.719  | 337.169  | 726.926  | 487.587  |
| <a href="#">AMK58_19685</a> | <a href="#">no KO assigned (GenBank) hypothetical protein</a>                                                                                                                                                          | Hypothetical                 | 148.100  | 170.075  | 181.586  | 338.853  | 1557.376 | 500.369  |
| <a href="#">AMK58_19690</a> | <a href="#">K09812 cell division transport system ATP-binding protein (GenBank) cell division ATP-binding protein</a>                                                                                                  | Cell Cycle/Shape/Homeostasis | 228.815  | 212.439  | 207.248  | 134.798  | 898.959  | 213.494  |
| <a href="#">AMK58_19695</a> | <a href="#">K09811 cell division transport system permease protein (GenBank) hypothetical protein</a>                                                                                                                  | Cell Cycle/Shape/Homeostasis | 56.314   | 76.101   | 63.233   | 153.565  | 340.610  | 89.766   |
| <a href="#">AMK58_19700</a> | <a href="#">no KO assigned (GenBank) hypothetical protein</a>                                                                                                                                                          | Hypothetical                 | 108.251  | 127.320  | 111.353  | 225.342  | 408.704  | 329.289  |
| <a href="#">AMK58_19705</a> | <a href="#">no KO assigned (GenBank) hypothetical protein</a>                                                                                                                                                          | Hypothetical                 | 17.628   | 17.091   | 23.230   | 69.597   | 80.039   | 24.662   |
| <a href="#">AMK58_19710</a> | <a href="#">K00655 1-acyl-sn-glycerol-3-phosphate acyltransferase [EC:2.3.1.51] (GenBank) acyltransferase</a>                                                                                                          | Lipid metabolism             | 29.380   | 30.486   | 26.464   | 52.405   | 129.662  | 84.453   |
| <a href="#">AMK58_19715</a> | <a href="#">no KO assigned (GenBank) hypothetical protein</a>                                                                                                                                                          | Hypothetical                 | 109.263  | 111.003  | 84.818   | 178.668  | 193.214  | 599.456  |
| <a href="#">AMK58_19720</a> | <a href="#">K00525 ribonucleoside-diphosphate reductase alpha chain [EC:1.17.4.1] (GenBank) ribonucleotide reductase alpha chain</a>                                                                                   | Metabolism: Nucleotide       | 37.201   | 26.092   | 33.420   | 38.132   | 40.337   | 46.255   |
| <a href="#">AMK58_19725</a> | <a href="#">no KO assigned (GenBank) hypothetical protein</a>                                                                                                                                                          | Hypothetical                 | 20.761   | 19.707   | 26.197   | 212.869  | 97.272   | 110.470  |
| <a href="#">AMK58_19730</a> | <a href="#">K01951 GMP synthase (glutamine-hydrolysing) [EC:6.3.5.2] (GenBank) glutamine amidotransferase</a>                                                                                                          | Metabolism: Nucleotide       | 245.082  | 250.392  | 265.823  | 387.213  | 248.341  | 653.787  |
| <a href="#">AMK58_19735</a> | <a href="#">K00375 GntR family transcriptional regulator / MoeR family aminotransferase (GenBank) GntR family transcriptional regulator</a>                                                                            | Transcription                | 22.899   | 24.743   | 27.023   | 103.120  | 42.352   | 101.276  |
| <a href="#">AMK58_19740</a> | <a href="#">K05782 benzoate membrane transport protein (GenBank) benzoate transporter</a>                                                                                                                              | Membrane Transport           | 5.375    | 7.006    | 5.761    | 147.787  | 31.964   | 86.082   |
| <a href="#">AMK58_19745</a> | <a href="#">no KO assigned (GenBank) LysR family transcriptional regulator</a>                                                                                                                                         | Transcription                | 2.562    | 3.827    | 8.771    | 305.836  | 58.902   | 249.251  |
| <a href="#">AMK58_19750</a> | <a href="#">K00355 NAD(P)H dehydrogenase (quinone) [EC:1.6.5.2] (GenBank) NAD(P)H dehydrogenase</a>                                                                                                                    | Energy                       | 3.711    | 6.467    | 5.734    | 261.196  | 87.948   | 321.754  |
| <a href="#">AMK58_19755</a> | <a href="#">K09936 bacterial/archaeal transporter family-2 protein (GenBank) hypothetical protein</a>                                                                                                                  | Transport                    | 11.493   | 11.178   | 18.805   | 276.038  | 85.622   | 200.995  |
| <a href="#">AMK58_19760</a> | <a href="#">no KO assigned (GenBank) hypothetical protein</a>                                                                                                                                                          | Hypothetical                 | 2.214    | 2.035    | 5.991    | 280.575  | 28.903   | 237.803  |

|             |                                                                                                      |                                       |          |          |          |          |          |          |
|-------------|------------------------------------------------------------------------------------------------------|---------------------------------------|----------|----------|----------|----------|----------|----------|
| AMK58_19765 | no KO assigned   (GenBank) glycosyl transferase family 1                                             | Glycosyl Transferase                  | 3.737    | 3.126    | 5.472    | 58.968   | 11.257   | 51.006   |
| AMK58_19770 | no KO assigned   (GenBank) hypothetical protein                                                      | Hypothetical                          | 109.706  | 108.673  | 92.419   | 766.005  | 194.875  | 627.761  |
| AMK58_19775 | no KO assigned   (GenBank) ABC transporter substrate-binding protein                                 | Membrane Transport enzyme             | 82.051   | 75.059   | 81.080   | 209.248  | 98.852   | 286.911  |
| AMK58_19780 | K04654 hydrogenase expression/formation protein HvpD   (GenBank) hydrogenase formation protein HvpD  | enzyme                                | 136.899  | 138.960  | 166.317  | 27.600   | 16.236   | 51.112   |
| AMK58_19785 | no KO assigned   (GenBank) hypothetical protein                                                      | Hypothetical                          | 9721.942 | 9314.488 | 8533.896 | 181.658  | 267.456  | 421.410  |
| AMK58_19790 | no KO assigned   (GenBank) peptidase M1                                                              | Peptidase                             | 4.547    | 8.186    | 6.218    | 105.621  | 55.095   | 118.738  |
| AMK58_19795 | K07232 cation transport protein ChaC   (GenBank) gamma-glutamyl cyclotransferase                     | Transport: Ion                        | 8.337    | 13.584   | 14.412   | 311.681  | 160.160  | 206.794  |
| AMK58_19800 | no KO assigned   (GenBank) hypothetical protein                                                      | Hypothetical                          | 80.239   | 84.891   | 103.539  | 310.936  | 264.805  | 183.352  |
| AMK58_19805 | no KO assigned   (GenBank) hypothetical protein                                                      | Hypothetical                          | 112.427  | 128.022  | 121.606  | 146.868  | 218.397  | 90.529   |
| AMK58_19810 | no KO assigned   (GenBank) hypothetical protein                                                      | Hypothetical                          | 81.188   | 90.068   | 84.062   | 272.203  | 142.977  | 184.058  |
| AMK58_19815 | K08989 putative membrane protein   (GenBank) hypothetical protein                                    | Membrane                              | 360.666  | 334.509  | 352.113  | 429.069  | 1086.509 | 664.658  |
| AMK58_19820 | no KO assigned   (GenBank) hypothetical protein                                                      | Hypothetical                          | 68.293   | 81.351   | 74.744   | 45.224   | 106.113  | 60.723   |
| AMK58_19825 | K01682 aconitate hydratase 2 / 2-methylisocitrate dehydratase [EC:4.2.1.3 4.2.1.99]   (GenBank) acon | Metabolism: Carbon                    | 9.926    | 10.909   | 9.215    | 31.358   | 19.840   | 21.186   |
| AMK58_19830 | no KO assigned   (GenBank) AraC family transcriptional regulator                                     | Transcription                         | 65.299   | 76.761   | 79.620   | 389.570  | 68.471   | 132.873  |
| AMK58_19835 | K08223 MFS transporter_FSR family_fosmidomycin resistance protein   (GenBank) Fosmidomycin resist    | Transport: MFS                        | 1031.746 | 845.114  | 899.379  | 299.358  | 472.828  | 418.079  |
| AMK58_19840 | no KO assigned   (GenBank) hypothetical protein                                                      | Hypothetical                          | 15.394   | 39.772   | 30.065   | 628.122  | 79.505   | 560.577  |
| AMK58_19845 | K02553 regulator of ribonuclease activity A   (GenBank) ribonuclease activity regulator protein RraA | post translation modification         | 25.285   | 30.503   | 37.448   | 438.683  | 86.903   | 469.143  |
| AMK58_19850 | no KO assigned   (GenBank) hypothetical protein                                                      | Hypothetical                          | 40.127   | 41.453   | 43.431   | 44.303   | 64.082   | 110.232  |
| AMK58_19855 | K07220 uncharacterized protein   (GenBank) hypothetical protein                                      | Hypothetical                          | 59.797   | 95.120   | 74.458   | 138.131  | 53.272   | 205.656  |
| AMK58_19860 | K03306 inorganic phosphate transporter_PiT family   (GenBank) inorganic phosphate transporter        | Transport: Inorganic                  | 18.858   | 21.528   | 23.412   | 161.060  | 47.930   | 103.694  |
| AMK58_19865 | K14225 tRNA Gly   (GenBank) tRNA-Gly                                                                 | tRNA synthesis/modification           | 807.165  | 511.171  | 646.201  | 1816.482 | 361.101  | 2184.019 |
| AMK58_19870 | no KO assigned   (GenBank) hypothetical protein                                                      | Hypothetical                          | 25.552   | 15.219   | 20.057   | 61.846   | 9.842    | 43.587   |
| AMK58_19875 | no KO assigned   (GenBank) hypothetical protein                                                      | Hypothetical                          | 7.053    | 16.387   | 10.059   | 49.338   | 11.451   | 88.653   |
| AMK58_19880 | no KO assigned   (GenBank) hypothetical protein                                                      | Hypothetical                          | 1328.097 | 1654.444 | 1766.338 | 3351.010 | 1754.555 | 2609.838 |
| AMK58_19885 | K09136 ribosomal protein S12 methylthiotransferase accessory factor   (GenBank) hypothetical protein | Ribosome                              | 144.369  | 158.073  | 134.807  | 52.007   | 90.190   | 73.691   |
| AMK58_19890 | no KO assigned   (GenBank) tftuA protein                                                             | No COG                                | 336.424  | 409.713  | 361.396  | 100.099  | 49.086   | 101.744  |
| AMK58_19895 | no KO assigned   (GenBank) Crp/Fnr family transcriptional regulator                                  | Transcription                         | 273.483  | 327.596  | 272.335  | 362.922  | 86.709   | 322.282  |
| AMK58_19900 | no KO assigned   (GenBank) hypothetical protein                                                      | Hypothetical                          | 113.253  | 164.484  | 128.802  | 385.977  | 72.449   | 295.614  |
| AMK58_19905 | no KO assigned   (GenBank) hypothetical protein                                                      | Hypothetical                          | 33.484   | 31.512   | 26.653   | 24.054   | 14.122   | 95.949   |
| AMK58_19910 | no KO assigned   (GenBank) regulator                                                                 | Signal transduction                   | 598.009  | 688.156  | 776.983  | 106.940  | 191.723  | 312.771  |
| AMK58_19915 | K01784 UDP-glucose 4-epimerase [EC:5.1.3.2]   (GenBank) epimerase                                    | Metabolism: Carbohydrates             | 95.404   | 73.251   | 95.082   | 305.039  | 246.489  | 501.542  |
| AMK58_19920 | K03324 phosphate:Na <sup>+</sup> symporter   (GenBank) sodium:phosphate symporter                    | Transport: Ion                        | 61.114   | 68.460   | 71.264   | 19.501   | 118.190  | 54.932   |
| AMK58_19925 | no KO assigned   (GenBank) multidrug DMT transporter permease                                        | Defense                               | 33.497   | 35.364   | 55.385   | 152.635  | 235.290  | 153.560  |
| AMK58_19930 | no KO assigned   (GenBank) LysR family transcriptional regulator                                     | Transcription                         | 213.816  | 272.497  | 375.451  | 324.927  | 410.144  | 198.779  |
| AMK58_19935 | no KO assigned   (GenBank) hypothetical protein                                                      | Hypothetical                          | 2.465    | 4.601    | 6.298    | 222.644  | 132.803  | 233.967  |
| AMK58_19940 | no KO assigned   (GenBank) hypothetical protein                                                      | Hypothetical                          | 4.309    | 3.003    | 6.623    | 102.160  | 55.939   | 62.261   |
| AMK58_19945 | no KO assigned   (GenBank) hypothetical protein                                                      | Hypothetical                          | 28.761   | 27.715   | 44.989   | 763.081  | 443.737  | 709.751  |
| AMK58_19950 | K03745 SlyX protein   (GenBank) SlyX protein                                                         | No COG                                | 330.153  | 304.747  | 378.933  | 1306.497 | 1308.007 | 1062.924 |
| AMK58_19955 | no KO assigned   (GenBank) hypothetical protein                                                      | Hypothetical                          | 6.246    | 17.223   | 6.395    | 189.217  | 169.576  | 111.379  |
| AMK58_19960 | K03711 Fur family transcriptional regulator_ferric uptake regulator   (GenBank) Fur family transcri  | Transcription                         | 39.512   | 40.467   | 38.910   | 65.782   | 228.408  | 108.606  |
| AMK58_19965 | no KO assigned   (GenBank) hypothetical protein                                                      | Hypothetical                          | 19.262   | 25.573   | 26.842   | 27.167   | 59.913   | 24.949   |
| AMK58_19970 | no KO assigned   (GenBank) hypothetical protein                                                      | Hypothetical                          | 150.352  | 191.923  | 177.366  | 66.318   | 317.322  | 91.249   |
| AMK58_19975 | no KO assigned   (GenBank) hypothetical protein                                                      | Hypothetical                          | 4.713    | 7.920    | 10.784   | 409.608  | 91.722   | 278.079  |
| AMK58_19980 | K03406 methyl-accepting chemotaxis protein   (GenBank) chemotaxis protein                            | Chemotaxis                            | 3.766    | 5.519    | 7.499    | 197.593  | 71.321   | 115.630  |
| AMK58_19985 | no KO assigned   (GenBank) hypothetical protein                                                      | Hypothetical                          | 8.617    | 9.314    | 10.540   | 64.271   | 40.740   | 51.758   |
| AMK58_19990 | no KO assigned   (GenBank) hypothetical protein                                                      | Hypothetical                          | 1416.626 | 1288.000 | 1308.081 | 710.675  | 1457.403 | 645.432  |
| AMK58_19995 | no KO assigned   (GenBank) hypothetical protein                                                      | Hypothetical                          | 22.005   | 24.484   | 28.716   | 340.722  | 117.567  | 398.107  |
| AMK58_20000 | K14234 tRNA Thr   (GenBank) tRNA-Thr                                                                 | tRNA synthesis/modification           | 831.380  | 1138.079 | 1026.861 | 1394.799 | 2386.167 | 1588.242 |
| AMK58_20005 | K14218 tRNA Ala   (GenBank) tRNA-Ala                                                                 | tRNA synthesis/modification           | 211.881  | 333.124  | 375.651  | 2641.923 | 1925.002 | 1978.014 |
| AMK58_20010 | K14221 tRNA Asp   (GenBank) tRNA-Asp                                                                 | tRNA synthesis/modification           | 9.434    | 9.394    | 8.970    | 141.123  | 40.651   | 202.669  |
| AMK58_20015 | K14237 tRNA Val   (GenBank) tRNA-Val                                                                 | tRNA synthesis/modification           | 1444.826 | 1745.698 | 839.601  | 60.549   | 381.061  | 366.748  |
| AMK58_20020 | K14223 tRNA Gln   (GenBank) tRNA-Gln                                                                 | tRNA synthesis/modification           | 948.965  | 928.632  | 724.938  | 333.139  | 191.266  | 73.932   |
| AMK58_20025 | no KO assigned   (GenBank) hypothetical protein                                                      | Hypothetical                          | 84.965   | 82.488   | 90.378   | 157.206  | 37.008   | 32.992   |
| AMK58_20030 | no KO assigned   (GenBank) hypothetical protein                                                      | Hypothetical                          | 59.790   | 53.582   | 52.822   | 15.351   | 75.887   | 49.436   |
| AMK58_20035 | no KO assigned   (GenBank) hypothetical protein                                                      | Hypothetical                          | 16.993   | 25.381   | 25.919   | 138.474  | 100.677  | 248.503  |
| AMK58_20040 | K01420 CRP/FNR family transcriptional regulator_anaerobic regulatory protein   (GenBank) hypotetic   | Transcription                         | 28.488   | 48.224   | 36.718   | 182.327  | 78.098   | 115.058  |
| AMK58_20045 | no KO assigned   (GenBank) hypothetical protein                                                      | Hypothetical                          | 125.908  | 163.152  | 133.501  | 130.461  | 786.407  | 71.709   |
| AMK58_20050 | no KO assigned   (GenBank) hypothetical protein                                                      | Hypothetical                          | 88.519   | 90.018   | 104.886  | 418.079  | 587.015  | 268.948  |
| AMK58_20055 | K17675 ATP-dependent RNA helicase SUPV3L/SUV3 [EC:3.6.4.13]   (GenBank) RNA helicase                 | Genetic Information Processing        | 5.385    | 5.199    | 6.051    | 31.111   | 17.913   | 35.406   |
| AMK58_20060 | K00311 electron-transferring-flavoprotein dehydrogenase [EC:1.5.5.1]   (GenBank) electron transfer f | Energy                                | 1.027    | 0.877    | 1.605    | 58.584   | 25.899   | 29.530   |
| AMK58_20065 | K02334 DNA polymerase bacteriophage-type [EC:2.7.7.7]   (GenBank) uracil-DNA glycosylase             | DNA Repair and Replication            | 21.785   | 25.864   | 28.547   | 537.627  | 141.430  | 143.477  |
| AMK58_20070 | no KO assigned   (GenBank) murein transglycosylase                                                   | transglycosylase                      | 80.655   | 58.720   | 74.293   | 104.750  | 55.860   | 130.953  |
| AMK58_20075 | K03638 molybdenum cofactor biosynthesis protein B   (GenBank) molybdenum cofactor biosynthesis prot  | Biosynthesis: Co-Factors and Vitamins | 81.167   | 101.027  | 111.046  | 176.985  | 63.865   | 240.010  |
| AMK58_20080 | no KO assigned   (GenBank) aminoglycoside phosphotransferase                                         | transferase                           | 33.791   | 49.936   | 55.629   | 251.756  | 97.574   | 178.148  |
| AMK58_20085 | no KO assigned   (GenBank) hypothetical protein                                                      | Hypothetical                          | 11.768   | 9.512    | 13.559   | 30.045   | 54.780   | 28.437   |
| AMK58_20090 | K00919 4-diphosphocytidyl-2-C-methyl-D-erythritol kinase [EC:2.7.1.148]   (GenBank) 4-diphosphocytid | Metabolism: terpenoids and polyketide | 8.589    | 11.248   | 11.076   | 111.434  | 78.164   | 66.554   |
| AMK58_20095 | no KO assigned   (GenBank) hypothetical protein                                                      | Hypothetical                          | 395.813  | 424.214  | 487.973  | 571.843  | 600.896  | 499.110  |

|                             |                                                                                                                                                                               |                                |          |          |          |          |         |          |
|-----------------------------|-------------------------------------------------------------------------------------------------------------------------------------------------------------------------------|--------------------------------|----------|----------|----------|----------|---------|----------|
| <a href="#">AMK58_20100</a> | <a href="#">no KO assigned   (GenBank) pseudogene</a>                                                                                                                         | Pseudogene                     | 102.497  | 107.164  | 113.596  | 335.956  | 126.012 | 211.768  |
| <a href="#">AMK58_20105</a> | <a href="#">K17686 Cu+-exporting ATPase [EC:3.6.3.54]   (GenBank) copper-transporting ATPase</a>                                                                              | Hydrolase                      | 6.617    | 8.148    | 10.470   | 54.536   | 24.868  | 36.580   |
| <a href="#">AMK58_20110</a> | <a href="#">no KO assigned   (GenBank) hypothetical protein</a>                                                                                                               | Hypothetical                   | 26.321   | 34.945   | 37.817   | 336.908  | 65.746  | 398.096  |
| <a href="#">AMK58_20115</a> | <a href="#">no KO assigned   (GenBank) hypothetical protein</a>                                                                                                               | Hypothetical                   | 21.765   | 29.279   | 34.399   | 576.146  | 110.333 | 336.809  |
| <a href="#">AMK58_20120</a> | <a href="#">no KO assigned   (GenBank) hypothetical protein</a>                                                                                                               | Hypothetical                   | 5.805    | 0.000    | 8.673    | 125.898  | 13.361  | 160.202  |
| <a href="#">AMK58_20125</a> | <a href="#">no KO assigned   (GenBank) hypothetical protein</a>                                                                                                               | Hypothetical                   | 2.590    | 1.289    | 7.798    | 131.541  | 69.866  | 287.178  |
| <a href="#">AMK58_20130</a> | <a href="#">K06911 uncharacterized protein   (GenBank) quercetin 2,3-dioxygenase</a>                                                                                          | No COG                         | 1.559    | 0.000    | 4.776    | 169.843  | 12.850  | 146.802  |
| <a href="#">AMK58_20135</a> | <a href="#">no KO assigned   (GenBank) hypothetical protein</a>                                                                                                               | Hypothetical                   | 4.973    | 1.143    | 6.729    | 302.593  | 37.410  | 172.927  |
| <a href="#">AMK58_20140</a> | <a href="#">K06975 uncharacterized protein   (GenBank) acetyltransferase</a>                                                                                                  | Acetyltransferase              | 32.113   | 51.853   | 37.548   | 344.718  | 174.141 | 575.432  |
| <a href="#">AMK58_20145</a> | <a href="#">K01607 4-carboxymuconolactone decarboxylase [EC:4.1.1.44]   (GenBank) 4-carboxymuconolactone decarboxylase</a>                                                    | Metabolism                     | 23.142   | 25.292   | 37.568   | 303.957  | 77.722  | 217.735  |
| <a href="#">AMK58_20150</a> | <a href="#">no KO assigned   (GenBank) MerR family transcriptional regulator</a>                                                                                              | Transcription                  | 12.575   | 12.231   | 14.459   | 166.103  | 187.046 | 88.134   |
| <a href="#">AMK58_20155</a> | <a href="#">K01996 branched-chain amino acid transport system ATP-binding protein   (GenBank) livF: ABC transporter</a>                                                       | Transport: Amino Acid          | 9.274    | 9.234    | 9.797    | 51.761   | 97.485  | 78.031   |
| <a href="#">AMK58_20160</a> | <a href="#">K07090 uncharacterized protein   (GenBank) hypothetical protein</a>                                                                                               | Hypothetical                   | 9.276    | 8.750    | 10.831   | 74.553   | 62.742  | 115.439  |
| <a href="#">AMK58_20165</a> | <a href="#">K01895 acetyl-CoA synthetase [EC:6.2.1.1]   (GenBank) AMP-dependent synthetase</a>                                                                                | Metabolism                     | 38.112   | 36.235   | 39.298   | 84.353   | 32.151  | 97.967   |
| <a href="#">AMK58_20170</a> | <a href="#">no KO assigned   (GenBank) hypothetical protein</a>                                                                                                               | Hypothetical                   | 266.637  | 346.777  | 304.828  | 400.605  | 94.297  | 254.394  |
| <a href="#">AMK58_20175</a> | <a href="#">no KO assigned   (GenBank) hypothetical protein</a>                                                                                                               | Hypothetical                   | 239.071  | 289.944  | 260.468  | 149.514  | 79.278  | 155.091  |
| <a href="#">AMK58_20180</a> | <a href="#">no KO assigned   (GenBank) hypothetical protein</a>                                                                                                               | Hypothetical                   | 97.450   | 82.333   | 134.305  | 355.358  | 408.833 | 305.319  |
| <a href="#">AMK58_20185</a> | <a href="#">no KO assigned   (GenBank) hypothetical protein</a>                                                                                                               | Hypothetical                   | 8.607    | 12.531   | 9.903    | 224.968  | 54.470  | 79.608   |
| <a href="#">AMK58_20190</a> | <a href="#">no KO assigned   (GenBank) glycosyl transferase</a>                                                                                                               | Glycosyl Transferase           | 35.719   | 48.039   | 42.637   | 61.933   | 10.602  | 66.674   |
| <a href="#">AMK58_20195</a> | <a href="#">no KO assigned   (GenBank) hypothetical protein</a>                                                                                                               | Hypothetical                   | 136.080  | 148.381  | 183.502  | 946.777  | 175.642 | 496.577  |
| <a href="#">AMK58_20200</a> | <a href="#">no KO assigned   (GenBank) hypothetical protein</a>                                                                                                               | Hypothetical                   | 282.508  | 304.019  | 369.827  | 463.836  | 577.903 | 602.568  |
| <a href="#">AMK58_20205</a> | <a href="#">no KO assigned   (GenBank) fusaric acid resistance protein</a>                                                                                                    | Defense                        | 2.030    | 2.079    | 2.812    | 17.011   | 5.671   | 8.926    |
| <a href="#">AMK58_20210</a> | <a href="#">no KO assigned   (GenBank) secretion protein HlyD</a>                                                                                                             | Secretion System               | 4.677    | 3.194    | 5.718    | 55.315   | 30.944  | 50.806   |
| <a href="#">AMK58_20215</a> | <a href="#">K06075 MarR family transcriptional regulator, transcriptional regulator for hemolysin   (GenBank) MarR</a>                                                        | Transcription                  | 33.505   | 21.231   | 44.406   | 798.009  | 219.119 | 410.479  |
| <a href="#">AMK58_20220</a> | <a href="#">no KO assigned   (GenBank) LysR family transcriptional regulator</a>                                                                                              | Transcription                  | 8.072    | 12.056   | 13.047   | 254.271  | 79.085  | 210.319  |
| <a href="#">AMK58_20225</a> | <a href="#">no KO assigned   (GenBank) MFS sugar transporter</a>                                                                                                              | Transport: Sugar               | 4.056    | 9.693    | 9.834    | 105.951  | 27.925  | 90.455   |
| <a href="#">AMK58_20230</a> | <a href="#">no KO assigned   (GenBank) 2,5-dihydrogluconate reductase</a>                                                                                                     | enzyme                         | 4.696    | 6.138    | 9.628    | 248.882  | 45.364  | 152.415  |
| <a href="#">AMK58_20235</a> | <a href="#">no KO assigned   (GenBank) permease</a>                                                                                                                           | No COG                         | 0.883    | 2.436    | 2.455    | 139.888  | 26.883  | 99.984   |
| <a href="#">AMK58_20240</a> | <a href="#">K07290 AsmA family protein   (GenBank) membrane biogenesis protein</a>                                                                                            | Membrane                       | 2.878    | 2.508    | 5.246    | 78.643   | 38.624  | 97.979   |
| <a href="#">AMK58_20245</a> | <a href="#">no KO assigned   (GenBank) hypothetical protein</a>                                                                                                               | Hypothetical                   | 60.537   | 71.418   | 77.267   | 287.498  | 130.546 | 249.251  |
| <a href="#">AMK58_20250</a> | <a href="#">no KO assigned   (GenBank) hypothetical protein</a>                                                                                                               | Hypothetical                   | 9.420    | 8.828    | 19.318   | 255.341  | 104.224 | 293.134  |
| <a href="#">AMK58_20255</a> | <a href="#">no KO assigned   (GenBank) hypothetical protein</a>                                                                                                               | Hypothetical                   | 30.825   | 34.174   | 39.582   | 495.071  | 45.364  | 480.019  |
| <a href="#">AMK58_20260</a> | <a href="#">no KO assigned   (GenBank) hypothetical protein</a>                                                                                                               | Hypothetical                   | 11.624   | 16.387   | 16.392   | 217.123  | 29.949  | 117.841  |
| <a href="#">AMK58_20265</a> | <a href="#">no KO assigned   (GenBank) CoA-transferase</a>                                                                                                                    | No COG                         | 1.812    | 4.810    | 3.349    | 69.566   | 6.788   | 35.277   |
| <a href="#">AMK58_20270</a> | <a href="#">K00252 glutaryl-CoA dehydrogenase [EC:1.3.8.6]   (GenBank) acyl-CoA dehydrogenase</a>                                                                             | Metabolism                     | 13.386   | 15.032   | 17.416   | 141.828  | 19.911  | 102.377  |
| <a href="#">AMK58_20275</a> | <a href="#">no KO assigned   (GenBank) LysR family transcriptional regulator</a>                                                                                              | Transcription                  | 107.358  | 167.049  | 133.177  | 302.111  | 56.631  | 198.612  |
| <a href="#">AMK58_20280</a> | <a href="#">K02052 putative spermidine/putrescine transport system ATP-binding protein   (GenBank) spermidine/putrescine transport system ATP-binding protein</a>             | Quorum sensing                 | 370.423  | 609.965  | 384.248  | 148.305  | 65.227  | 224.539  |
| <a href="#">AMK58_20285</a> | <a href="#">K02055 putative spermidine/putrescine transport system substrate-binding protein   (GenBank) spermidine/putrescine transport system substrate-binding protein</a> | Quorum sensing                 | 4.626    | 4.145    | 8.576    | 155.835  | 18.718  | 150.336  |
| <a href="#">AMK58_20290</a> | <a href="#">K02054 putative spermidine/putrescine transport system permease protein   (GenBank) polyamine ABC transporter</a>                                                 | Quorum sensing                 | 120.404  | 150.055  | 119.221  | 203.792  | 51.937  | 187.561  |
| <a href="#">AMK58_20295</a> | <a href="#">K02053 putative spermidine/putrescine transport system permease protein   (GenBank) polyamine ABC transporter</a>                                                 | Quorum sensing                 | 994.387  | 934.878  | 924.830  | 134.081  | 113.002 | 323.569  |
| <a href="#">AMK58_20300</a> | <a href="#">no KO assigned   (GenBank) XRE family transcriptional regulator</a>                                                                                               | Transcription                  | 204.689  | 175.584  | 185.174  | 318.550  | 57.229  | 410.696  |
| <a href="#">AMK58_20305</a> | <a href="#">K00135 succinate-semialdehyde dehydrogenase / glutarate-semialdehyde dehydrogenase [EC:1.2.1.16 1.2.1.21]</a>                                                     | Metabolism                     | 56.801   | 49.613   | 56.059   | 53.283   | 11.761  | 117.814  |
| <a href="#">AMK58_20310</a> | <a href="#">K07250 4-aminobutyrate aminotransferase / (S)-3-amino-2-methylpropionate transaminase [EC:2.6.1.19 2.6.1.20]</a>                                                  | Metabolism                     | 35.937   | 25.854   | 31.664   | 36.923   | 48.220  | 103.546  |
| <a href="#">AMK58_20315</a> | <a href="#">no KO assigned   (GenBank) hypothetical protein</a>                                                                                                               | Hypothetical                   | 131.791  | 103.531  | 103.412  | 441.353  | 133.018 | 423.918  |
| <a href="#">AMK58_20320</a> | <a href="#">no KO assigned   (GenBank) RNA signal recognition particle 4.5S RNA</a>                                                                                           | No COG                         | 472.390  | 373.536  | 523.068  | 582.717  | 199.306 | 753.372  |
| <a href="#">AMK58_20325</a> | <a href="#">K04750 PhnB protein   (GenBank) bleomycin resistance protein</a>                                                                                                  | Defense                        | 31.452   | 34.921   | 31.228   | 203.571  | 37.230  | 200.279  |
| <a href="#">AMK58_20330</a> | <a href="#">no KO assigned   (GenBank) polyketide cyclase</a>                                                                                                                 | No COG                         | 186.690  | 197.562  | 184.933  | 97.312   | 64.096  | 145.347  |
| <a href="#">AMK58_20335</a> | <a href="#">K16137 TetR/AcrR family transcriptional regulator, transcriptional repressor for nem operon   (GenBank) TetR/AcrR family transcriptional regulator</a>            | Transcription                  | 162.363  | 164.449  | 142.351  | 68.013   | 57.071  | 135.034  |
| <a href="#">AMK58_20340</a> | <a href="#">no KO assigned   (GenBank) hypothetical protein</a>                                                                                                               | Hypothetical                   | 31.917   | 35.459   | 37.119   | 96.817   | 41.065  | 68.854   |
| <a href="#">AMK58_20345</a> | <a href="#">K06987 uncharacterized protein   (GenBank) deacylase</a>                                                                                                          | No COG                         | 20.722   | 20.741   | 22.591   | 54.353   | 49.998  | 81.385   |
| <a href="#">AMK58_20350</a> | <a href="#">K00819 ornithine-oxo-acid transaminase [EC:2.6.1.13]   (GenBank) roeD: ornithine-oxo-acid aminotransferase</a>                                                    | Metabolism: Amino Acid         | 59.046   | 65.922   | 50.471   | 72.038   | 19.442  | 272.378  |
| <a href="#">AMK58_20355</a> | <a href="#">K01476 arginase [EC:3.5.3.1]   (GenBank) arginase</a>                                                                                                             | Biosynthesis: Amino Acid       | 244.155  | 186.455  | 182.331  | 255.703  | 54.099  | 141.209  |
| <a href="#">AMK58_20360</a> | <a href="#">no KO assigned   (GenBank) AsnC family transcriptional regulator</a>                                                                                              | Transcription                  | 2902.690 | 1812.604 | 1512.647 | 669.537  | 161.789 | 425.002  |
| <a href="#">AMK58_20365</a> | <a href="#">no KO assigned   (GenBank) chromosome partitioning protein</a>                                                                                                    | Cell Cycle/Shape/Homeostasis   | 446.728  | 309.058  | 286.737  | 159.199  | 40.226  | 97.590   |
| <a href="#">AMK58_20370</a> | <a href="#">no KO assigned   (GenBank) galactosyltransferase</a>                                                                                                              | enzyme                         | 6.624    | 12.884   | 8.202    | 42.094   | 9.523   | 62.420   |
| <a href="#">AMK58_20375</a> | <a href="#">no KO assigned   (GenBank) hypothetical protein</a>                                                                                                               | Hypothetical                   | 29.343   | 27.956   | 31.190   | 81.746   | 17.368  | 48.858   |
| <a href="#">AMK58_20380</a> | <a href="#">no KO assigned   (GenBank) hypothetical protein</a>                                                                                                               | Hypothetical                   | 40.693   | 42.021   | 30.889   | 286.461  | 29.553  | 197.831  |
| <a href="#">AMK58_20385</a> | <a href="#">no KO assigned   (GenBank) alpha-1,3-fucosyltransferase</a>                                                                                                       | transferase                    | 18.446   | 19.230   | 23.071   | 310.276  | 30.336  | 125.586  |
| <a href="#">AMK58_20390</a> | <a href="#">K14231 tRNA Phe   (GenBank) tRNA-Phe</a>                                                                                                                          | tRNA synthesis/modification    | 353.666  | 295.053  | 301.430  | 1348.704 | 284.721 | 1793.360 |
| <a href="#">AMK58_20395</a> | <a href="#">K09862 uncharacterized protein   (GenBank) hypothetical protein</a>                                                                                               | Hypothetical                   | 283.810  | 268.342  | 230.857  | 917.309  | 297.064 | 617.483  |
| <a href="#">AMK58_20400</a> | <a href="#">K08300 ribonuclease E [EC:3.1.26.12]   (GenBank) ribonuclease E</a>                                                                                               | Genetic Information Processing | 1.755    | 2.330    | 2.410    | 18.412   | 9.314   | 34.621   |
| <a href="#">AMK58_20405</a> | <a href="#">K06287 septum formation protein   (GenBank) septum formation inhibitor Maf</a>                                                                                    | Cell Cycle/Shape/Homeostasis   | 7.392    | 2.387    | 3.229    | 49.245   | 33.462  | 62.804   |
| <a href="#">AMK58_20410</a> | <a href="#">K02518 translation initiation factor IF-1   (GenBank) translation initiation factor IF-1</a>                                                                      | Translation                    | 90.115   | 59.454   | 97.772   | 1041.248 | 513.301 | 702.839  |
| <a href="#">AMK58_20415</a> | <a href="#">no KO assigned   (GenBank) hypothetical protein</a>                                                                                                               | Hypothetical                   | 92.247   | 87.439   | 93.508   | 85.994   | 113.536 | 44.723   |
| <a href="#">AMK58_20420</a> | <a href="#">no KO assigned   (GenBank) histidine kinase</a>                                                                                                                   | Signal Transduction            | 103.838  | 100.466  | 85.840   | 27.594   | 65.802  | 34.061   |
| <a href="#">AMK58_20425</a> | <a href="#">no KO assigned   (GenBank) ArsC family transcriptional regulator</a>                                                                                              | Transcription                  | 105.306  | 140.519  | 164.419  | 534.533  | 55.879  | 305.830  |
| <a href="#">AMK58_20430</a> | <a href="#">no KO assigned   (GenBank) hypothetical protein</a>                                                                                                               | Hypothetical                   | 166.196  | 200.682  | 181.140  | 1000.314 | 158.635 | 901.179  |



|                             |                                                                                                                    |                            |          |          |          |          |          |          |
|-----------------------------|--------------------------------------------------------------------------------------------------------------------|----------------------------|----------|----------|----------|----------|----------|----------|
| <a href="#">AMK58_20435</a> | <a href="#">K00013 histidinol dehydrogenase [EC:1.1.1.231] (GenBank) histidinol dehydrogenase</a>                  | Metabolism: Amino Acid     | 36.933   | 44.242   | 33.532   | 38.067   | 30.382   | 87.893   |
| <a href="#">AMK58_20440</a> | <a href="#">K00765 ATP phosphoribosyltransferase [EC:2.4.2.17] (GenBank) hisG: ATP phosphoribosyltransferase</a>   | Biosynthesis: Amino Acid   | 115.826  | 104.881  | 100.665  | 42.183   | 78.523   | 102.536  |
| <a href="#">AMK58_20445</a> | <a href="#">no KO assigned (GenBank) hypothetical protein</a>                                                      | Hypothetical               | 789.094  | 899.696  | 892.888  | 1285.384 | 577.550  | 692.609  |
| <a href="#">AMK58_20450</a> | <a href="#">K02073 D-methionine transport system substrate-binding protein (GenBank) methionine ABC transport</a>  | Membrane Transport         | 244.323  | 249.465  | 218.283  | 115.401  | 104.862  | 234.039  |
| <a href="#">AMK58_20455</a> | <a href="#">K00666 fatty-acyl-CoA synthase [EC:6.2.1.-] (GenBank) acyl-CoA synthetase</a>                          | enzyme                     | 0.217    | 1.732    | 0.689    | 88.809   | 3.991    | 41.253   |
| <a href="#">AMK58_20460</a> | <a href="#">K02071 D-methionine transport system ATP-binding protein (GenBank) phosphate ABC transporter AT</a>    | Transport                  | 9.891    | 10.188   | 11.458   | 112.083  | 43.575   | 187.854  |
| <a href="#">AMK58_20465</a> | <a href="#">K02072 D-methionine transport system permease protein (GenBank) DL-methionine transporter permease</a> | Transport: Amino Acid      | 14.544   | 15.206   | 17.631   | 379.408  | 100.333  | 390.415  |
| <a href="#">AMK58_20470</a> | <a href="#">K02073 D-methionine transport system substrate-binding protein (GenBank) metal ABC transporter sub</a> | Transport: Amino Acid      | 97.977   | 80.373   | 90.112   | 178.384  | 206.433  | 187.677  |
| <a href="#">AMK58_20475</a> | <a href="#">no KO assigned (GenBank) hypothetical protein</a>                                                      | Hypothetical               | 26.500   | 20.699   | 24.751   | 65.978   | 47.364   | 53.921   |
| <a href="#">AMK58_20480</a> | <a href="#">no KO assigned (GenBank) histidine kinase</a>                                                          | Signal Transduction        | 163.681  | 131.641  | 140.291  | 57.601   | 60.718   | 81.257   |
| <a href="#">AMK58_20485</a> | <a href="#">K01214 isoamylase [EC:3.2.1.68] (GenBank) glycogen debranching protein</a>                             | Metabolism: Carbohydrate   | 66.257   | 80.689   | 73.825   | 109.188  | 29.052   | 108.979  |
| <a href="#">AMK58_20490</a> | <a href="#">no KO assigned (GenBank) hypothetical protein</a>                                                      | Hypothetical               | 6465.883 | 8325.896 | 7418.195 | 2187.052 | 1875.749 | 1727.138 |
| <a href="#">AMK58_20495</a> | <a href="#">no KO assigned (GenBank) hypothetical protein</a>                                                      | Hypothetical               | 92.045   | 126.904  | 150.126  | 979.754  | 870.280  | 1579.326 |
| <a href="#">AMK58_20500</a> | <a href="#">no KO assigned (GenBank) hypothetical protein</a>                                                      | Hypothetical               | 48.919   | 58.453   | 38.373   | 102.663  | 20.620   | 43.093   |
| <a href="#">AMK58_20505</a> | <a href="#">K01834 2,3-bisphosphoglycerate-dependent phosphoglycerate mutase [EC:5.4.2.11] (GenBank) gpmA: p</a>   | Metabolism                 | 107.569  | 146.190  | 161.046  | 29.585   | 52.151   | 73.078   |
| <a href="#">AMK58_20510</a> | <a href="#">K17675 ATP-dependent RNA helicase SUPV3L/SUV3 [EC:3.6.4.13] (GenBank) helicase</a>                     | Translation                | 27.401   | 37.754   | 48.219   | 13.231   | 9.968    | 30.136   |
| <a href="#">AMK58_20515</a> | <a href="#">no KO assigned (GenBank) glycosyltransferase</a>                                                       | Glycosyl Transferase       | 24.030   | 23.928   | 37.641   | 145.678  | 474.075  | 177.546  |
| <a href="#">AMK58_20520</a> | <a href="#">K16554 polysaccharide biosynthesis transport protein (GenBank) exopolysaccharide biosynthesis prot</a> | Transport: polysaccharide  | 22.175   | 27.722   | 30.524   | 239.665  | 167.023  | 142.288  |
| <a href="#">AMK58_20525</a> | <a href="#">K01181 endo-1,4-beta-xylanase [EC:3.2.1.8] (GenBank) glycosyl hydrolase</a>                            | Hydrolase                  | 20.467   | 17.223   | 42.850   | 127.046  | 47.201   | 183.552  |
| <a href="#">AMK58_20530</a> | <a href="#">no KO assigned (GenBank) methyltransferase</a>                                                         | methyltransferase          | 34.350   | 25.751   | 74.759   | 411.501  | 186.890  | 386.222  |
| <a href="#">AMK58_20535</a> | <a href="#">K01179 endoglucanase [EC:3.2.1.41] (GenBank) endoglucanase</a>                                         | Metabolism: Carbohydrate   | 1.558    | 1.454    | 4.073    | 95.146   | 17.620   | 99.585   |
| <a href="#">AMK58_20540</a> | <a href="#">no KO assigned (GenBank) hypothetical protein</a>                                                      | Hypothetical               | 49.182   | 45.881   | 80.008   | 66.647   | 97.157   | 133.784  |
| <a href="#">AMK58_20545</a> | <a href="#">no KO assigned (GenBank) UDP-phosphate galactose phosphotransferase</a>                                | No COG                     | 37.009   | 45.022   | 51.748   | 256.065  | 53.082   | 380.444  |
| <a href="#">AMK58_20550</a> | <a href="#">no KO assigned (GenBank) polymerase</a>                                                                | DNA Repair and Replication | 13.573   | 14.056   | 26.070   | 164.004  | 92.865   | 177.970  |
| <a href="#">AMK58_20555</a> | <a href="#">no KO assigned (GenBank) glycosyl transferase family 2</a>                                             | Glycosyl Transferase       | 17.602   | 10.516   | 38.373   | 215.069  | 52.996   | 313.492  |
| <a href="#">AMK58_20560</a> | <a href="#">no KO assigned (GenBank) glycosyl transferase family 1</a>                                             | Glycosyl Transferase       | 14.020   | 14.958   | 37.706   | 187.272  | 93.093   | 224.632  |
| <a href="#">AMK58_20565</a> | <a href="#">no KO assigned (GenBank) glycosyl transferase family 1</a>                                             | Glycosyl Transferase       | 8.587    | 7.054    | 24.902   | 175.270  | 64.910   | 137.948  |
| <a href="#">AMK58_20570</a> | <a href="#">no KO assigned (GenBank) polysaccharide deacetylase</a>                                                | Metabolism: Carbohydrates  | 15.665   | 15.863   | 43.675   | 328.995  | 132.363  | 245.221  |
| <a href="#">AMK58_20575</a> | <a href="#">no KO assigned (GenBank) acyl carrier protein</a>                                                      | No COG                     | 63.595   | 36.533   | 105.429  | 751.953  | 351.460  | 725.406  |
| <a href="#">AMK58_20580</a> | <a href="#">no KO assigned (GenBank) long-chain fatty acid--CoA ligase</a>                                         | No COG                     | 5.433    | 10.201   | 15.497   | 90.970   | 29.312   | 117.595  |
| <a href="#">AMK58_20585</a> | <a href="#">K01953 asparagine synthase (glutamine-hydrolysing) [EC:6.3.5.4] (GenBank) asparagine synthase</a>      | Metabolism: Amino Acid     | 25.486   | 25.079   | 47.667   | 10.122   | 32.220   | 34.476   |
| <a href="#">AMK58_20590</a> | <a href="#">K01916 NAD+ synthase [EC:6.3.1.5] (GenBank) nadE: NAD(+) synthetase</a>                                | Energy                     | 33.031   | 33.010   | 73.777   | 353.012  | 105.715  | 295.710  |
| <a href="#">AMK58_20595</a> | <a href="#">no KO assigned (GenBank) hypothetical protein</a>                                                      | Hypothetical               | 12.031   | 16.336   | 30.782   | 434.986  | 71.919   | 334.882  |
| <a href="#">AMK58_20600</a> | <a href="#">K01980 23S ribosomal RNA (GenBank) 23S ribosomal RNA</a>                                               | Ribosome                   | 8.177    | 9.193    | 17.347   | 54.945   | 16.950   | 62.984   |
| <a href="#">AMK58_20605</a> | <a href="#">K01977 16S ribosomal RNA (GenBank) 16S ribosomal RNA</a>                                               | Ribosome                   | 8.839    | 10.174   | 20.741   | 143.827  | 29.807   | 111.743  |
| <a href="#">AMK58_20610</a> | <a href="#">no KO assigned (GenBank) transcriptional regulator</a>                                                 | Transcription              | 85.884   | 51.458   | 70.662   | 32.635   | 185.883  | 247.130  |
| <a href="#">AMK58_20615</a> | <a href="#">no KO assigned (GenBank) hypothetical protein</a>                                                      | Hypothetical               | 8.760    | 9.346    | 13.088   | 13.411   | 46.068   | 40.614   |
| <a href="#">AMK58_20620</a> | <a href="#">K03455 monovalent cation:H+ antiporter-2, CPA2 family (GenBank) potassium transporter KefB</a>         | Transport: Ion             | 9.040    | 9.356    | 11.776   | 43.383   | 15.522   | 48.512   |
| <a href="#">AMK58_20625</a> | <a href="#">no KO assigned (GenBank) hypothetical protein</a>                                                      | Hypothetical               | 4.245    | 5.404    | 3.705    | 43.436   | 11.028   | 42.069   |
| <a href="#">AMK58_20630</a> | <a href="#">K02045 sulfate transport system ATP-binding protein [EC:3.6.3.25] (GenBank) sulfate ABC transport</a>  | Energy                     | 5.117    | 6.254    | 7.077    | 248.031  | 58.830   | 215.480  |
| <a href="#">AMK58_20635</a> | <a href="#">K02047 sulfate transport system permease protein (GenBank) cysW: sulfate/thiosulfate transporter p</a> | Energy                     | 4.922    | 4.201    | 8.557    | 371.841  | 57.851   | 302.385  |
| <a href="#">AMK58_20640</a> | <a href="#">K02046 sulfate transport system permease protein (GenBank) sulfate transporter</a>                     | Energy                     | 35.155   | 41.167   | 31.955   | 164.823  | 49.948   | 125.570  |
| <a href="#">AMK58_20645</a> | <a href="#">K02048 sulfate transport system substrate-binding protein (GenBank) ABC transporter permease</a>       | Energy                     | 76.182   | 68.407   | 69.201   | 131.814  | 57.215   | 166.407  |
| <a href="#">AMK58_20650</a> | <a href="#">no KO assigned (GenBank) hypothetical protein</a>                                                      | Hypothetical               | 100.841  | 86.724   | 99.121   | 208.882  | 103.213  | 102.175  |
| <a href="#">AMK58_20655</a> | <a href="#">no KO assigned (GenBank) Rrf2 family transcriptional regulator</a>                                     | Transcription              | 255.513  | 134.132  | 137.482  | 253.125  | 307.336  | 542.017  |
| <a href="#">AMK58_20660</a> | <a href="#">no KO assigned (GenBank) hypothetical protein</a>                                                      | Hypothetical               | 13.772   | 13.713   | 20.550   | 338.208  | 132.008  | 154.482  |
| <a href="#">AMK58_20665</a> | <a href="#">no KO assigned (GenBank) osmotically inducible protein OsmC</a>                                        | Stress response            | 91.101   | 90.243   | 88.191   | 70.818   | 197.110  | 246.862  |
| <a href="#">AMK58_20670</a> | <a href="#">no KO assigned (GenBank) ABC transporter substrate-binding protein</a>                                 | Membrane Transport         | 249.558  | 237.155  | 224.245  | 73.613   | 127.642  | 152.769  |
| <a href="#">AMK58_20675</a> | <a href="#">K14393 cation/acetate symporter (GenBank) actP: cation/acetate symporter ActP</a>                      | Transport: Ion             | 176.866  | 199.128  | 168.993  | 59.109   | 40.071   | 41.656   |
| <a href="#">AMK58_20680</a> | <a href="#">no KO assigned (GenBank) hypothetical protein</a>                                                      | Hypothetical               | 1337.255 | 1340.063 | 1151.927 | 492.796  | 383.416  | 842.382  |
| <a href="#">AMK58_20685</a> | <a href="#">no KO assigned (GenBank) hypothetical protein</a>                                                      | Hypothetical               | 15.463   | 24.019   | 18.525   | 307.594  | 80.126   | 366.633  |
| <a href="#">AMK58_20690</a> | <a href="#">no KO assigned (GenBank) hypothetical protein</a>                                                      | Hypothetical               | 1.416    | 2.820    | 3.590    | 132.151  | 16.978   | 130.434  |
| <a href="#">AMK58_20695</a> | <a href="#">no KO assigned (GenBank) hypothetical protein</a>                                                      | Hypothetical               | 3.232    | 2.758    | 3.951    | 43.342   | 12.541   | 69.317   |
| <a href="#">AMK58_20700</a> | <a href="#">no KO assigned (GenBank) short-chain dehydrogenase</a>                                                 | dehydrogenase              | 8.601    | 10.870   | 9.751    | 64.697   | 42.018   | 92.945   |
| <a href="#">AMK58_20705</a> | <a href="#">no KO assigned (GenBank) hypothetical protein</a>                                                      | Hypothetical               | 29.175   | 17.430   | 38.142   | 787.806  | 289.676  | 1246.689 |
| <a href="#">AMK58_20710</a> | <a href="#">no KO assigned (GenBank) 2-methylisocitrate lyase</a>                                                  | enzyme                     | 2.883    | 5.167    | 6.578    | 146.933  | 85.220   | 232.826  |
| <a href="#">AMK58_20715</a> | <a href="#">no KO assigned (GenBank) esterase</a>                                                                  | enzyme                     | 15.061   | 14.702   | 13.945   | 30.591   | 200.267  | 136.823  |
| <a href="#">AMK58_20720</a> | <a href="#">no KO assigned (GenBank) CopG family transcriptional regulator</a>                                     | Transcription              | 88.500   | 124.004  | 116.489  | 388.860  | 194.095  | 351.778  |
| <a href="#">AMK58_20725</a> | <a href="#">no KO assigned (GenBank) hypothetical protein</a>                                                      | Hypothetical               | 18.923   | 16.781   | 19.678   | 238.031  | 115.987  | 158.603  |
| <a href="#">AMK58_20730</a> | <a href="#">no KO assigned (GenBank) hypothetical protein</a>                                                      | Hypothetical               | 9.532    | 16.963   | 16.969   | 130.401  | 102.811  | 244.097  |
| <a href="#">AMK58_20735</a> | <a href="#">no KO assigned (GenBank) hypothetical protein</a>                                                      | Hypothetical               | 134.735  | 144.671  | 155.706  | 196.286  | 42.224   | 194.745  |
| <a href="#">AMK58_20740</a> | <a href="#">K05794 tellurite resistance protein TerC (GenBank) tellurium resistance protein TerC</a>               | Defense                    | 63.371   | 52.507   | 74.107   | 39.036   | 50.694   | 79.672   |
| <a href="#">AMK58_20745</a> | <a href="#">no KO assigned (GenBank) hypothetical protein</a>                                                      | Hypothetical               | 111.850  | 106.781  | 122.794  | 548.343  | 425.129  | 685.380  |
| <a href="#">AMK58_20750</a> | <a href="#">no KO assigned (GenBank) hypothetical protein</a>                                                      | Hypothetical               | 97.071   | 81.949   | 100.322  | 296.811  | 1189.259 | 525.882  |
| <a href="#">AMK58_20755</a> | <a href="#">K16092 vitamin B12 transporter (GenBank) outer membrane cobalamin receptor protein BtuB</a>            | Transport: Inorganic       | 21.842   | 25.124   | 29.839   | 20.431   | 465.708  | 52.497   |
| <a href="#">AMK58_20760</a> | <a href="#">K02016 iron complex transport system substrate-binding protein (GenBank) hypothetical protein</a>      | Transport: Metal           | 20.390   | 18.483   | 28.345   | 61.220   | 22.129   | 152.301  |
| <a href="#">AMK58_20765</a> | <a href="#">K02015 iron complex transport system permease protein (GenBank) ABC transporter permease</a>           | Transport: Metal           | 42.970   | 73.045   | 72.119   | 303.860  | 138.762  | 357.942  |

|             |                                                                                                      |                                       |           |           |           |          |          |          |
|-------------|------------------------------------------------------------------------------------------------------|---------------------------------------|-----------|-----------|-----------|----------|----------|----------|
| AMK58_20770 | K02013 iron complex transport system ATP-binding protein [EC:3.6.3.341] (GenBank) ABC transporter    | Transport: Metal                      | 0.453     | 0.903     | 2.012     | 167.045  | 19.879   | 24.388   |
| AMK58_20775 | no KO assigned   (GenBank) hypothetical protein                                                      | Hypothetical                          | 0.170     | 1.013     | 2.741     | 247.368  | 33.547   | 42.612   |
| AMK58_20780 | no KO assigned   (GenBank) ATPase                                                                    | No COG                                | 0.340     | 0.338     | 0.646     | 27.448   | 8.398    | 10.707   |
| AMK58_20785 | no KO assigned   (GenBank) hypothetical protein                                                      | Hypothetical                          | 13.453    | 16.487    | 23.942    | 231.958  | 79.872   | 138.498  |
| AMK58_20790 | no KO assigned   (GenBank) hypothetical protein                                                      | Hypothetical                          | 123.900   | 156.727   | 146.201   | 1249.372 | 288.064  | 1064.691 |
| AMK58_20795 | no KO assigned   (GenBank) hypothetical protein                                                      | Hypothetical                          | 74.218    | 93.995    | 78.697    | 226.327  | 46.518   | 130.664  |
| AMK58_20800 | no KO assigned   (GenBank) hypothetical protein                                                      | Hypothetical                          | 6.018     | 14.806    | 9.088     | 44.577   | 5.571    | 17.070   |
| AMK58_20805 | no KO assigned   (GenBank) hypothetical protein                                                      | Hypothetical                          | 19.675    | 27.126    | 19.426    | 108.462  | 14.176   | 18.478   |
| AMK58_20810 | no KO assigned   (GenBank) hypothetical protein                                                      | Hypothetical                          | 5.204     | 6.453     | 5.509     | 61.428   | 4.194    | 8.195    |
| AMK58_20815 | no KO assigned   (GenBank) hypothetical protein                                                      | Hypothetical                          | 9.283     | 9.283     | 10.190    | 38.318   | 8.822    | 29.591   |
| AMK58_20820 | no KO assigned   (GenBank) hypothetical protein                                                      | Hypothetical                          | 17.059    | 25.480    | 23.730    | 158.695  | 22.815   | 104.067  |
| AMK58_20825 | K09956 uncharacterized protein   (GenBank) hypothetical protein                                      | Hypothetical                          | 40.729    | 46.454    | 61.256    | 1584.660 | 267.608  | 693.188  |
| AMK58_20830 | no KO assigned   (GenBank) PadR family transcriptional regulator                                     | Transcription                         | 98.969    | 72.699    | 77.903    | 448.524  | 201.290  | 317.063  |
| AMK58_20835 | K02016 iron complex transport system substrate-binding protein   (GenBank) iron ABC transporter subs | Transport: Metal                      | 44.004    | 46.668    | 36.764    | 73.245   | 37.755   | 41.286   |
| AMK58_20840 | K02015 iron complex transport system permease protein   (GenBank) iron ABC transporter permease      | Transport: Metal                      | 30.647    | 35.414    | 32.377    | 63.861   | 34.732   | 54.498   |
| AMK58_20845 | K02015 iron complex transport system permease protein   (GenBank) enterobactin ABC transporter perme | Transport: Metal                      | 319.544   | 326.392   | 308.622   | 128.232  | 32.640   | 200.693  |
| AMK58_20850 | K02013 iron complex transport system ATP-binding protein [EC:3.6.3.341] (GenBank) iron ABC transpor  | Transport: Metal                      | 182.968   | 185.842   | 200.662   | 230.778  | 20.082   | 209.855  |
| AMK58_20855 | K16422 4-hydroxymandelate oxidase [EC:1.1.3.461] (GenBank) alpha-hydroxy-acid oxidizing enzyme       | Biosynthesis: secondary metabolites   | 138.085   | 89.672    | 104.336   | 103.507  | 7.623    | 151.858  |
| AMK58_20860 | K07126 uncharacterized protein   (GenBank) hypothetical protein                                      | Hypothetical                          | 123.237   | 130.247   | 108.781   | 155.428  | 17.822   | 194.133  |
| AMK58_20865 | K07336 PKHD-type hydroxylase [EC:1.14.11.-] (GenBank) PKHD-type hydroxylase                          | Oxidoreductase                        | 143.104   | 162.150   | 132.043   | 231.829  | 16.244   | 109.818  |
| AMK58_20870 | K16090 catecholate siderophore receptor   (GenBank) hydrogenase                                      | No COG                                | 35.313    | 39.559    | 31.628    | 54.625   | 2.304    | 17.883   |
| AMK58_20875 | no KO assigned   (GenBank) anthranilate phosphoribosyltransferase                                    | No COG                                | 417.375   | 388.599   | 302.290   | 72.223   | 8.632    | 101.224  |
| AMK58_20880 | no KO assigned   (GenBank) hypothetical protein                                                      | Hypothetical                          | 16943.310 | 14506.001 | 12768.918 | 1154.484 | 233.407  | 1412.727 |
| AMK58_20885 | no KO assigned   (GenBank) hypothetical protein                                                      | Hypothetical                          | 236.413   | 310.884   | 279.714   | 706.922  | 158.660  | 444.140  |
| AMK58_20890 | K19302 undecaprenyl-diphosphatase [EC:3.6.1.271] (GenBank) phosphoesterase                           | Cell Wall                             | 65.222    | 82.884    | 71.607    | 104.262  | 139.334  | 106.088  |
| AMK58_20895 | K01251 adenosylhomocysteinase [EC:3.3.1.11] (GenBank) adenosylhomocysteinase                         | Metabolism: Amino Acid                | 51.955    | 64.853    | 56.721    | 45.487   | 121.180  | 49.295   |
| AMK58_20900 | no KO assigned   (GenBank) hypothetical protein                                                      | Hypothetical                          | 19.355    | 8.611     | 23.944    | 183.700  | 71.981   | 332.608  |
| AMK58_20905 | K04083 molecular chaperone Hsp33   (GenBank) molecular chaperone Hsp33                               | Chaperone                             | 576.893   | 353.284   | 471.162   | 166.805  | 180.453  | 232.000  |
| AMK58_20910 | K00611 ornithine carbamoyltransferase [EC:2.1.3.31] (GenBank) ornithine carbamoyltransferase         | Biosynthesis: Amino Acid              | 35.065    | 25.298    | 30.698    | 87.917   | 62.172   | 87.853   |
| AMK58_20915 | K00821 acetylornithine/N-succinyl-diaminopimelate aminotransferase [EC:2.6.1.171] (GenBank)          | Biosynthesis: Amino Acid              | 120.236   | 125.256   | 122.794   | 144.914  | 666.444  | 252.242  |
| AMK58_20920 | K01992 ABC-2 type transport system permease protein   (GenBank) multidrug ABC transporter permease   | Membrane Transport                    | 338.829   | 343.684   | 340.775   | 165.010  | 294.361  | 222.584  |
| AMK58_20925 | K03565 regulatory protein   (GenBank) regulator                                                      | signal transduction                   | 781.914   | 704.015   | 761.509   | 380.747  | 638.983  | 311.994  |
| AMK58_20930 | no KO assigned   (GenBank) hypothetical protein                                                      | Hypothetical                          | 172.062   | 196.944   | 181.613   | 85.839   | 228.380  | 254.821  |
| AMK58_20935 | K02902 large subunit ribosomal protein L28   (GenBank) 50S ribosomal protein L28                     | Ribosome                              | 9.590     | 16.711    | 11.778    | 407.338  | 81.746   | 91.150   |
| AMK58_20940 | no KO assigned   (GenBank) hypothetical protein                                                      | Hypothetical                          | 4.405     | 2.547     | 8.377     | 199.877  | 84.180   | 154.173  |
| AMK58_20945 | K07588 LAO/AO transport system kinase [EC:2.7.-.-] (GenBank) protein kinase                          | Enzyme                                | 831.983   | 816.204   | 756.578   | 53.739   | 415.457  | 135.617  |
| AMK58_20950 | no KO assigned   (GenBank) heme oxygenase                                                            | Enzyme                                | 72.905    | 71.298    | 74.477    | 479.873  | 82.436   | 258.945  |
| AMK58_20955 | K06147 ATP-binding cassette, subfamily B, bacterial   (GenBank) metal ABC transporter permease       | Membrane Transport                    | 13.019    | 15.556    | 16.773    | 94.434   | 21.072   | 56.497   |
| AMK58_20960 | no KO assigned   (GenBank) pseudogene                                                                | Pseudogene                            | 5.973     | 5.607     | 7.058     | 52.690   | 18.222   | 31.568   |
| AMK58_20965 | no KO assigned   (GenBank) hypothetical protein                                                      | Hypothetical                          | 242.412   | 300.615   | 290.538   | 753.357  | 762.652  | 852.229  |
| AMK58_20970 | no KO assigned   (GenBank) branched-chain amino acid transporter                                     | Transport: Amino Acid                 | 396.440   | 405.421   | 400.030   | 535.835  | 127.663  | 344.095  |
| AMK58_20975 | no KO assigned   (GenBank) branched-chain amino acid ABC transporter permease                        | transport                             | 43.680    | 53.582    | 57.796    | 174.867  | 39.577   | 114.118  |
| AMK58_20980 | K11068 hemolysin III   (GenBank) DNA-binding protein                                                 | Defense                               | 61.822    | 49.320    | 57.211    | 112.301  | 49.282   | 103.594  |
| AMK58_20985 | K03695 ATP-dependent Clp protease ATP-binding subunit ClpB   (GenBank) ATP-dependent chaperone (     | Chaperone                             | 52.645    | 57.187    | 52.418    | 74.836   | 45.933   | 65.629   |
| AMK58_20990 | no KO assigned   (GenBank) hypothetical protein                                                      | Hypothetical                          | 44.128    | 45.044    | 73.162    | 291.994  | 342.227  | 268.954  |
| AMK58_20995 | K07140 uncharacterized protein   (GenBank) hypothetical protein                                      | Hypothetical                          | 382.718   | 375.781   | 513.908   | 638.747  | 3115.935 | 835.597  |
| AMK58_21000 | no KO assigned   (GenBank) hypothetical protein                                                      | Hypothetical                          | 184.376   | 260.936   | 309.349   | 342.146  | 258.826  | 309.895  |
| AMK58_21005 | K02493 release factor glutamine methyltransferase [EC:2.1.1.2971] (GenBank) protein-(glutamine-N5)   | Translation                           | 114.844   | 125.212   | 131.680   | 168.825  | 423.879  | 237.276  |
| AMK58_21010 | no KO assigned   (GenBank) hypothetical protein                                                      | Hypothetical                          | 384.749   | 472.190   | 382.451   | 381.587  | 1538.231 | 361.758  |
| AMK58_21015 | K02835 peptide chain release factor   (GenBank) peptide chain release factor I                       | Enzyme                                | 13.528    | 15.491    | 16.507    | 233.916  | 70.454   | 87.600   |
| AMK58_21020 | K02492 glutamyl-tRNA reductase [EC:1.2.1.701] (GenBank) glutamyl-tRNA reductase                      | tRNA synthesis/modification           | 13.302    | 18.922    | 11.357    | 56.486   | 43.737   | 69.896   |
| AMK58_21025 | K03526 (E)-4-hydroxy-3-methylbut-2-enyl-diphosphate synthase [EC:1.17.7.1.17.7.3] (GenBank) 4-hy     | Metabolism: terpenoids and polyketide | 35.673    | 47.715    | 46.169    | 189.573  | 127.954  | 201.236  |
| AMK58_21030 | no KO assigned   (GenBank) hypothetical protein                                                      | Hypothetical                          | 32.675    | 39.265    | 48.758    | 177.437  | 154.718  | 85.232   |
| AMK58_21035 | K08484 phosphotransferase system, enzyme I, PtsP [EC:2.7.3.91] (GenBank) peptidase                   | Membrane transport                    | 39.727    | 45.269    | 41.575    | 99.172   | 181.044  | 124.028  |
| AMK58_21040 | K02371 enoyl-acyl-carrier protein   (GenBank) 2-nitropropane dioxygenase                             | Metabolism: Lipid                     | 49.423    | 50.931    | 49.351    | 125.759  | 45.122   | 119.774  |
| AMK58_21045 | K00928 aspartate kinase [EC:2.7.2.41] (GenBank) aspartate kinase                                     | Signal Transduction                   | 74.349    | 94.223    | 86.246    | 335.394  | 70.909   | 208.825  |
| AMK58_21050 | K00568 2-polyvinyl-6-hydroxyphenyl methylase / 3-demethylubiquinone-9 3-methyltransferase [EC:2.1.1  | Metabolism: Co-Factors and Vitamins   | 161.751   | 174.669   | 182.498   | 262.647  | 140.380  | 233.527  |
| AMK58_21055 | K02806 PTS system, nitrogen regulatory IIA component [EC:2.7.1.-] (GenBank) transcriptional regula   | Nitrogen                              | 1680.803  | 1668.918  | 1475.729  | 319.778  | 574.319  | 475.495  |
| AMK58_21060 | no KO assigned   (GenBank) ribose ABC transporter permease                                           | Membrane Transport                    | 59.422    | 54.524    | 50.521    | 238.796  | 101.215  | 131.075  |
| AMK58_21065 | K03092 RNA polymerase sigma-54 factor   (GenBank) RNA polymerase sigma-54 factor                     | Transcription                         | 135.039   | 151.272   | 128.688   | 25.900   | 168.693  | 62.538   |
| AMK58_21070 | K06861 lipopolysaccharide export system ATP-binding protein [EC:3.6.3.-] (GenBank) LPS export ABC    | Membrane Transport                    | 923.609   | 974.356   | 849.395   | 118.981  | 451.227  | 245.091  |
| AMK58_21075 | K09774 lipopolysaccharide export system protein LptA   (GenBank) hypothetical protein                | Transport: polysaccharide             | 245.929   | 270.956   | 275.669   | 273.022  | 321.040  | 275.480  |
| AMK58_21080 | K11719 lipopolysaccharide export system protein LptC   (GenBank) LPS export ABC transporter periplas | Transport: polysaccharide             | 135.604   | 134.062   | 152.417   | 89.310   | 201.055  | 140.262  |
| AMK58_21085 | K06041 arabinose-5-phosphate isomerase [EC:5.3.1.131] (GenBank) D-arabinose-5-phosphate              | Biosynthesis: polysaccharide          | 237.651   | 277.484   | 241.184   | 196.041  | 355.330  | 174.846  |
| AMK58_21090 | K03684 ribonuclease D [EC:3.1.13.51] (GenBank) 3'-5' exonuclease                                     | trna synthesis/modification           | 279.225   | 346.103   | 320.203   | 120.281  | 591.474  | 141.277  |
| AMK58_21095 | K14228 tRNA Leu   (GenBank) tRNA-Leu                                                                 | tRNA synthesis/modification           | 1553.097  | 1912.319  | 1959.668  | 2179.256 | 3111.372 | 1695.659 |
| AMK58_21100 | K00329 NADH dehydrogenase [EC:1.6.5.3] K00356 NADH dehydrogenase [EC:1.6.99.3] (GenBank) 3           | Energy                                | 128.780   | 132.981   | 146.748   | 94.527   | 208.126  | 155.703  |

|                             |                                                                                                                      |                                     |         |         |         |          |          |          |
|-----------------------------|----------------------------------------------------------------------------------------------------------------------|-------------------------------------|---------|---------|---------|----------|----------|----------|
| <a href="#">AMK58_21105</a> | <a href="#">no KO assigned   (GenBank) MES transporter</a>                                                           | Transport: MFS                      | 7.516   | 6.151   | 7.440   | 26.755   | 10.531   | 62.722   |
| <a href="#">AMK58_21110</a> | <a href="#">K06153 undecaprenyl-diphosphatase [EC:3.6.1.27]   (GenBank) UDP-diphosphatase</a>                        | Cell Wall                           | 373.352 | 357.614 | 364.471 | 277.397  | 224.104  | 256.076  |
| <a href="#">AMK58_21115</a> | <a href="#">K00266 glutamate synthase (NADPH/NADH) small chain [EC:1.4.1.13   1.4.1.14]   (GenBank) dihydropy</a>    | Energy                              | 31.668  | 32.948  | 39.326  | 155.134  | 263.639  | 94.527   |
| <a href="#">AMK58_21120</a> | <a href="#">K00265 glutamate synthase (NADPH/NADH) large chain [EC:1.4.1.13   1.4.1.14]   (GenBank) glutamate s</a>  | Energy                              | 20.153  | 21.313  | 24.553  | 31.239   | 28.128   | 33.548   |
| <a href="#">AMK58_21125</a> | <a href="#">no KO assigned   (GenBank) acetyltransferase</a>                                                         | Acetyltransferase                   | 307.669 | 361.678 | 392.257 | 441.172  | 385.037  | 584.911  |
| <a href="#">AMK58_21130</a> | <a href="#">K00799 glutathione S-transferase [EC:2.5.1.18]   (GenBank) glutathione S-transferase</a>                 | Metabolism: Amino Acid              | 653.514 | 749.306 | 930.932 | 946.448  | 891.624  | 1414.195 |
| <a href="#">AMK58_21135</a> | <a href="#">no KO assigned   (GenBank) hypothetical protein</a>                                                      | Hypothetical                        | 30.672  | 31.345  | 27.820  | 201.381  | 79.841   | 207.886  |
| <a href="#">AMK58_21140</a> | <a href="#">no KO assigned   (GenBank) hypothetical protein</a>                                                      | Hypothetical                        | 171.854 | 238.854 | 216.906 | 179.445  | 187.208  | 282.870  |
| <a href="#">AMK58_21145</a> | <a href="#">K07240 chromate transporter   (GenBank) chromate transporter</a>                                         | transport                           | 22.093  | 32.218  | 30.599  | 49.401   | 64.820   | 237.767  |
| <a href="#">AMK58_21150</a> | <a href="#">no KO assigned   (GenBank) histidine kinase</a>                                                          | Signal Transduction                 | 25.201  | 25.183  | 29.675  | 35.561   | 109.479  | 131.480  |
| <a href="#">AMK58_21155</a> | <a href="#">no KO assigned   (GenBank) two-component system response regulator</a>                                   | Signal Transduction                 | 24.765  | 31.784  | 41.338  | 596.156  | 137.949  | 237.978  |
| <a href="#">AMK58_21160</a> | <a href="#">no KO assigned   (GenBank) peptidase</a>                                                                 | Peptidase                           | 13.227  | 14.183  | 17.090  | 468.386  | 122.751  | 135.856  |
| <a href="#">AMK58_21165</a> | <a href="#">no KO assigned   (GenBank) hypothetical protein</a>                                                      | Hypothetical                        | 10.314  | 12.056  | 15.136  | 272.412  | 71.323   | 176.721  |
| <a href="#">AMK58_21170</a> | <a href="#">no KO assigned   (GenBank) mono-heme class I cytochrome C</a>                                            | Energy                              | 4.866   | 0.000   | 5.715   | 93.554   | 37.965   | 61.310   |
| <a href="#">AMK58_21175</a> | <a href="#">no KO assigned   (GenBank) cytochrome C</a>                                                              | Energy                              | 3.104   | 0.000   | 5.635   | 194.321  | 103.418  | 126.925  |
| <a href="#">AMK58_21180</a> | <a href="#">no KO assigned   (GenBank) hypothetical protein</a>                                                      | Hypothetical                        | 2.925   | 3.494   | 11.679  | 442.681  | 128.204  | 172.472  |
| <a href="#">AMK58_21185</a> | <a href="#">K00059 3-oxoacyl-[acyl-carrier protein] reductase [EC:1.1.1.100]   (GenBank) 3-oxoacyl-ACP reductase</a> | Metabolism                          | 7.882   | 3.767   | 5.246   | 150.782  | 33.669   | 74.700   |
| <a href="#">AMK58_21190</a> | <a href="#">K02051 NitT/TauT family transport system substrate-binding protein   (GenBank) nitrate ABC transport</a> | Transport: NitT/TauT                | 19.684  | 17.011  | 20.834  | 30.348   | 46.895   | 73.928   |
| <a href="#">AMK58_21195</a> | <a href="#">K02050 NitT/TauT family transport system permease protein   (GenBank) ABC transporter permease</a>       | Transport: NitT/TauT                | 78.123  | 97.803  | 83.219  | 186.720  | 109.676  | 137.970  |
| <a href="#">AMK58_21200</a> | <a href="#">K02049 NitT/TauT family transport system ATP-binding protein   (GenBank) nitrate ABC transporter ATP</a> | Transport: NitT/TauT                | 421.642 | 393.108 | 356.555 | 208.675  | 108.380  | 260.506  |
| <a href="#">AMK58_21205</a> | <a href="#">no KO assigned   (GenBank) acyl-CoA reductase</a>                                                        | enzyme                              | 36.968  | 38.539  | 36.643  | 103.139  | 44.156   | 70.015   |
| <a href="#">AMK58_21210</a> | <a href="#">no KO assigned   (GenBank) long-chain fatty acid-CoA ligase</a>                                          | No COG                              | 27.386  | 31.796  | 32.048  | 129.660  | 53.216   | 52.845   |
| <a href="#">AMK58_21215</a> | <a href="#">no KO assigned   (GenBank) hypothetical protein</a>                                                      | Hypothetical                        | 21.407  | 24.741  | 31.633  | 174.879  | 67.928   | 70.681   |
| <a href="#">AMK58_21220</a> | <a href="#">K01439 succinyl-diaminopimelate desuccinylase [EC:3.5.1.18]   (GenBank) succinyl-diaminopimelate des</a> | Metabolism                          | 169.920 | 202.810 | 193.210 | 153.723  | 392.063  | 211.249  |
| <a href="#">AMK58_21225</a> | <a href="#">K00127 formate dehydrogenase subunit gamma   (GenBank) formate dehydrogenase</a>                         | Metabolism                          | 89.631  | 90.689  | 94.501  | 324.372  | 176.041  | 400.038  |
| <a href="#">AMK58_21230</a> | <a href="#">K00124 formate dehydrogenase iron-sulfur subunit   (GenBank) formate dehydrogenase</a>                   | Metabolism                          | 118.790 | 154.680 | 128.151 | 405.465  | 371.902  | 330.278  |
| <a href="#">AMK58_21235</a> | <a href="#">K00123 formate dehydrogenase major subunit [EC:1.2.1.21]   (GenBank) formate dehydrogenase</a>           | Metabolism                          | 5.060   | 4.461   | 8.243   | 53.895   | 107.233  | 74.462   |
| <a href="#">AMK58_21240</a> | <a href="#">no KO assigned   (GenBank) hypothetical protein</a>                                                      | Hypothetical                        | 15.605  | 16.075  | 28.652  | 437.541  | 894.586  | 437.103  |
| <a href="#">AMK58_21245</a> | <a href="#">no KO assigned   (GenBank) molecular chaperone TorD</a>                                                  | Chaperone                           | 45.692  | 47.799  | 80.634  | 535.856  | 1945.473 | 895.190  |
| <a href="#">AMK58_21250</a> | <a href="#">no KO assigned   (GenBank) hypothetical protein</a>                                                      | Hypothetical                        | 0.215   | 1.283   | 0.612   | 20.129   | 36.919   | 11.147   |
| <a href="#">AMK58_21255</a> | <a href="#">no KO assigned   (GenBank) molybdopterin-guanine dinucleotide biosynthesis protein A</a>                 | No COG                              | 4.612   | 8.267   | 11.402  | 253.937  | 593.885  | 133.227  |
| <a href="#">AMK58_21260</a> | <a href="#">no KO assigned   (GenBank) hypothetical protein</a>                                                      | Hypothetical                        | 18.381  | 28.648  | 29.635  | 122.844  | 150.691  | 179.891  |
| <a href="#">AMK58_21265</a> | <a href="#">no KO assigned   (GenBank) hypothetical protein</a>                                                      | Hypothetical                        | 2.668   | 5.978   | 5.708   | 259.140  | 93.728   | 98.352   |
| <a href="#">AMK58_21270</a> | <a href="#">K03517 quinolinate synthase [EC:2.5.1.72]   (GenBank) quinolinate synthetase</a>                         | Metabolism: Co-Factors and Vitamins | 2.874   | 4.293   | 5.238   | 82.296   | 62.056   | 42.754   |
| <a href="#">AMK58_21275</a> | <a href="#">K00278 L-aspartate oxidase [EC:1.4.3.16]   (GenBank) L-aspartate oxidase</a>                             | Metabolism: Amino Acid              | 1.119   | 1.337   | 1.490   | 69.851   | 64.651   | 70.765   |
| <a href="#">AMK58_21280</a> | <a href="#">K00767 nicotinate-nucleotide pyrophosphorylase (carboxylating) [EC:2.4.2.19]   (GenBank) nicotinate-</a> | Metabolism: Co-Factors and Vitamins | 5.204   | 5.204   | 10.490  | 194.856  | 59.985   | 287.809  |
| <a href="#">AMK58_21285</a> | <a href="#">K01854 UDP-galactopyranose mutase [EC:5.4.99.9]   (GenBank) UDP-galactopyranose mutase</a>               | Metabolism: Carbohydrate            | 2.124   | 2.307   | 2.662   | 114.073  | 47.318   | 32.410   |
| <a href="#">AMK58_21290</a> | <a href="#">K00364 GMP reductase [EC:1.7.1.7]   (GenBank) GMP reductase</a>                                          | Metabolism: Nucleotide              | 3.827   | 2.771   | 7.278   | 124.902  | 82.256   | 81.299   |
| <a href="#">AMK58_21295</a> | <a href="#">no KO assigned   (GenBank) peptidase M20</a>                                                             | Peptidases                          | 12.864  | 15.253  | 26.049  | 214.932  | 253.202  | 258.867  |
| <a href="#">AMK58_21300</a> | <a href="#">K02083 allantoate deiminase [EC:3.5.3.9]   (GenBank) Zn-dependent hydrolase</a>                          | Metabolism: Nucleotide              | 93.194  | 94.933  | 108.538 | 107.602  | 79.662   | 186.755  |
| <a href="#">AMK58_21305</a> | <a href="#">no KO assigned   (GenBank) OHCu decarboxylase</a>                                                        | No COG                              | 158.242 | 155.754 | 192.342 | 525.845  | 174.977  | 252.432  |
| <a href="#">AMK58_21310</a> | <a href="#">K07127 5-hydroxyisourate hydrolase [EC:3.5.2.17]   (GenBank) 5-hydroxyisourate hydrolase</a>             | Metabolism: Nucleotide              | 140.754 | 129.526 | 143.027 | 473.601  | 220.448  | 217.735  |
| <a href="#">AMK58_21315</a> | <a href="#">no KO assigned   (GenBank) cysteine desulfurase</a>                                                      | No COG                              | 24.093  | 27.938  | 24.068  | 75.305   | 47.307   | 53.920   |
| <a href="#">AMK58_21320</a> | <a href="#">no KO assigned   (GenBank) LysR family transcriptional regulator</a>                                     | Transcription                       | 29.860  | 26.881  | 30.724  | 83.650   | 51.035   | 64.858   |
| <a href="#">AMK58_21325</a> | <a href="#">K06145 LacI family transcriptional regulator, gluconate utilization system Gnt-I transcriptional rep</a> | Transcription                       | 46.923  | 52.725  | 39.806  | 147.914  | 62.179   | 169.951  |
| <a href="#">AMK58_21330</a> | <a href="#">K03703 excinuclease ABC subunit C   (GenBank) excinuclease ABC subunit C</a>                             | DNA Repair and Replication          | 11.943  | 17.251  | 15.911  | 112.168  | 24.489   | 97.726   |
| <a href="#">AMK58_21335</a> | <a href="#">no KO assigned   (GenBank) hypothetical protein</a>                                                      | Hypothetical                        | 570.205 | 640.686 | 760.881 | 1427.236 | 810.079  | 1294.309 |
| <a href="#">AMK58_21340</a> | <a href="#">no KO assigned   (GenBank) hypothetical protein</a>                                                      | Hypothetical                        | 131.837 | 212.184 | 186.237 | 1298.208 | 1868.408 | 1210.517 |
| <a href="#">AMK58_21345</a> | <a href="#">no KO assigned   (GenBank) hypothetical protein</a>                                                      | Hypothetical                        | 237.182 | 471.108 | 344.766 | 124.758  | 725.830  | 288.447  |
| <a href="#">AMK58_21350</a> | <a href="#">no KO assigned   (GenBank) hypothetical protein</a>                                                      | Hypothetical                        | 172.400 | 228.014 | 185.191 | 95.490   | 706.353  | 102.914  |
| <a href="#">AMK58_21355</a> | <a href="#">no KO assigned   (GenBank) hypothetical protein</a>                                                      | Hypothetical                        | 112.615 | 165.717 | 124.547 | 42.636   | 433.144  | 17.297   |
| <a href="#">AMK58_21360</a> | <a href="#">no KO assigned   (GenBank) hypothetical protein</a>                                                      | Hypothetical                        | 4.557   | 3.889   | 19.186  | 665.311  | 251.699  | 408.034  |
| <a href="#">AMK58_21365</a> | <a href="#">no KO assigned   (GenBank) YgiQ family radical SAM protein</a>                                           | No COG                              | 9.188   | 13.550  | 23.057  | 177.921  | 146.421  | 183.395  |
| <a href="#">AMK58_21370</a> | <a href="#">no KO assigned   (GenBank) hypothetical protein</a>                                                      | Hypothetical                        | 1.614   | 2.411   | 2.302   | 52.981   | 260.392  | 247.742  |
| <a href="#">AMK58_21375</a> | <a href="#">no KO assigned   (GenBank) peptidase</a>                                                                 | peptidase                           | 73.711  | 61.872  | 87.317  | 471.257  | 1050.571 | 519.265  |
| <a href="#">AMK58_21380</a> | <a href="#">K02303 uroporphyrin-III C-methyltransferase [EC:2.1.1.107]   (GenBank) uroporphyrin-III methyltransf</a> | Metabolism: Co-Factors and Vitamins | 17.448  | 19.942  | 19.042  | 103.246  | 87.318   | 56.838   |
| <a href="#">AMK58_21385</a> | <a href="#">K00372 assimilatory nitrate reductase catalytic subunit [EC:1.7.99.4]   (GenBank) nitrate reductase</a>  | Nitrogen                            | 11.206  | 13.336  | 14.263  | 49.457   | 18.166   | 43.509   |
| <a href="#">AMK58_21390</a> | <a href="#">K00363 nitrite reductase (NADH) small subunit [EC:1.7.1.15]   (GenBank) nitrite reductase</a>            | Energy                              | 2.713   | 6.079   | 7.094   | 276.216  | 46.508   | 161.329  |
| <a href="#">AMK58_21395</a> | <a href="#">K00362 nitrite reductase (NADH) large subunit [EC:1.7.1.15]   (GenBank) nitrite reductase</a>            | Energy                              | 1.620   | 5.573   | 4.435   | 262.746  | 30.408   | 128.159  |
| <a href="#">AMK58_21400</a> | <a href="#">K15576 nitrate/nitrite transport system substrate-binding protein   (GenBank) nitrate ABC transporte</a> | Nitrogen                            | 0.951   | 0.000   | 1.150   | 48.390   | 6.411    | 22.518   |
| <a href="#">AMK58_21405</a> | <a href="#">K15577 nitrate/nitrite transport system permease protein   (GenBank) nitrate ABC transporter permeas</a> | Nitrogen                            | 1.663   | 5.299   | 7.169   | 360.611  | 32.777   | 498.839  |
| <a href="#">AMK58_21410</a> | <a href="#">K15578 nitrate/nitrite transport system ATP-binding protein [EC:3.6.3.-]   (GenBank) nitrate/sulfona</a> | Nitrogen                            | 2.182   | 2.607   | 4.840   | 175.531  | 22.887   | 240.183  |
| <a href="#">AMK58_21415</a> | <a href="#">K07183 response regulator NasT   (GenBank) two-component system response regulator</a>                   | Signal Transduction                 | 7.228   | 13.196  | 15.082  | 363.641  | 76.059   | 376.466  |
| <a href="#">AMK58_21420</a> | <a href="#">no KO assigned   (GenBank) antibiotic biosynthesis monooxygenase</a>                                     | Defense                             | 37.836  | 36.598  | 45.911  | 757.350  | 152.295  | 504.211  |
| <a href="#">AMK58_21425</a> | <a href="#">no KO assigned   (GenBank) pseudogene</a>                                                                | Pseudogene                          | 12.205  | 15.743  | 17.934  | 53.505   | 31.490   | 55.299   |
| <a href="#">AMK58_21430</a> | <a href="#">no KO assigned   (GenBank) enamine deaminase RidA</a>                                                    | Enzyme                              | 73.434  | 96.085  | 65.205  | 110.156  | 95.845   | 404.340  |
| <a href="#">AMK58_21435</a> | <a href="#">no KO assigned   (GenBank) LysR family transcriptional regulator</a>                                     | Transcription                       | 25.440  | 32.627  | 27.355  | 136.493  | 68.571   | 270.979  |

|             |                                                                                                                       |                              |          |          |          |          |          |          |
|-------------|-----------------------------------------------------------------------------------------------------------------------|------------------------------|----------|----------|----------|----------|----------|----------|
| AMK58_21440 | <a href="#">no KO assigned   (GenBank) hypothetical protein</a>                                                       | Hypothetical                 | 3.884    | 6.053    | 6.262    | 55.872   | 57.133   | 149.693  |
| AMK58_21445 | <a href="#">K03649 double-stranded uracil-DNA glycosylase [EC:3.2.2.281]   (GenBank) DNA glycosylase</a>              | DNA Repair and Replication   | 12.175   | 17.511   | 19.937   | 351.554  | 121.394  | 455.351  |
| AMK58_21450 | <a href="#">K03497 chromosome partitioning protein, ParB family   (GenBank) hypothetical protein</a>                  | Cell Cycle/Shape/Homeostatis | 18.257   | 23.784   | 19.578   | 95.804   | 38.575   | 175.405  |
| AMK58_21455 | <a href="#">K03496 chromosome partitioning protein   (GenBank) chromosome partitioning protein</a>                    | Cell Cycle/Shape/Homeostatis | 13.057   | 13.474   | 13.882   | 110.032  | 48.567   | 91.137   |
| AMK58_21460 | <a href="#">no KO assigned   (GenBank) plasmid replication protein</a>                                                | DNA Repair and Replication   | 55.181   | 48.373   | 53.059   | 143.331  | 49.705   | 137.565  |
| AMK58_21465 | <a href="#">no KO assigned   (GenBank) hypothetical protein</a>                                                       | Hypothetical                 | 63.616   | 54.879   | 59.000   | 146.871  | 80.184   | 169.628  |
| AMK58_21470 | <a href="#">K03546 exonuclease SbcC   (GenBank) hypothetical protein</a>                                              | DNA Repair and Replication   | 63.764   | 61.191   | 58.552   | 36.342   | 66.982   | 74.668   |
| AMK58_21475 | <a href="#">K03547 exonuclease SbcD   (GenBank) metallophosphatase</a>                                                | DNA Repair and Replication   | 143.421  | 151.346  | 125.285  | 95.608   | 90.079   | 227.219  |
| AMK58_21480 | <a href="#">K01977 16S ribosomal RNA   (GenBank) 16S ribosomal RNA</a>                                                | Ribosome                     | 17.517   | 21.318   | 20.356   | 345.446  | 43.572   | 156.862  |
| AMK58_21485 | <a href="#">K14227 tRNA Ile   (GenBank) tRNA-Ile</a>                                                                  | tRNA synthesis/modification  | 199.695  | 131.519  | 203.327  | 1760.875 | 231.535  | 1131.445 |
| AMK58_21490 | <a href="#">K14218 tRNA Ala   (GenBank) tRNA-Ala</a>                                                                  | tRNA synthesis/modification  | 33.455   | 190.357  | 15.147   | 72.557   | 96.698   | 101.929  |
| AMK58_21495 | <a href="#">K01980 23S ribosomal RNA   (GenBank) 23S ribosomal RNA</a>                                                | Ribosome                     | 0.000    | 0.000    | 0.000    | 0.000    | 0.000    | 0.000    |
| AMK58_21500 | <a href="#">K01985 5S ribosomal RNA   (GenBank) 5S ribosomal RNA</a>                                                  | Ribosome                     | 0.000    | 0.000    | 0.000    | 0.000    | 0.000    | 0.000    |
| AMK58_21505 | <a href="#">no KO assigned   (GenBank) hypothetical protein</a>                                                       | Hypothetical                 | 0.000    | 0.000    | 0.000    | 0.000    | 0.000    | 0.000    |
| AMK58_21510 | <a href="#">no KO assigned   (GenBank) hypothetical protein</a>                                                       | Hypothetical                 | 0.000    | 0.000    | 0.000    | 8.029    | 0.000    | 7.411    |
| AMK58_21515 | <a href="#">K01821 4-oxalocrotonate tautomerase [EC:5.3.2.6]   (GenBank) 4-oxalocrotonate tautomerase</a>             | Metabolism                   | 93.529   | 110.991  | 81.010   | 384.441  | 379.477  | 833.409  |
| AMK58_21520 | <a href="#">no KO assigned   (GenBank) aldolase</a>                                                                   | No COG                       | 27.014   | 32.084   | 35.588   | 36.841   | 44.633   | 147.278  |
| AMK58_21525 | <a href="#">no KO assigned   (GenBank) two-component system response regulator</a>                                    | Signal Transduction          | 59.818   | 69.252   | 63.070   | 13.714   | 18.165   | 43.857   |
| AMK58_21530 | <a href="#">no KO assigned   (GenBank) histidine kinase</a>                                                           | Signal Transduction          | 31.173   | 27.096   | 29.367   | 50.063   | 27.877   | 123.875  |
| AMK58_21535 | <a href="#">K02380 FdhF protein   (GenBank) formate dehydrogenase accessory protein FdhF</a>                          | dehydrogenase                | 44.125   | 48.224   | 56.408   | 319.686  | 105.094  | 252.357  |
| AMK58_21540 | <a href="#">K00123 formate dehydrogenase major subunit [EC:1.2.1.21]   (GenBank) formate dehydrogenase</a>            | Metabolism                   | 20.777   | 19.944   | 21.176   | 200.229  | 52.925   | 174.041  |
| AMK58_21545 | <a href="#">K00124 formate dehydrogenase iron-sulfur subunit   (GenBank) formate dehydrogenase</a>                    | Metabolism                   | 19.789   | 18.667   | 15.349   | 79.872   | 29.192   | 82.814   |
| AMK58_21550 | <a href="#">K00127 formate dehydrogenase subunit gamma   (GenBank) formate dehydrogenase</a>                          | Metabolism                   | 1078.579 | 867.341  | 735.452  | 623.378  | 163.183  | 829.873  |
| AMK58_21555 | <a href="#">K02379 FdhD protein   (GenBank) hypothetical protein</a>                                                  | No COG                       | 215.870  | 193.456  | 179.669  | 149.613  | 62.947   | 251.084  |
| AMK58_21560 | <a href="#">no KO assigned   (GenBank) histidine kinase</a>                                                           | Signal Transduction          | 97.178   | 70.251   | 59.218   | 39.429   | 17.395   | 101.788  |
| AMK58_21565 | <a href="#">no KO assigned   (GenBank) regulator</a>                                                                  | signal transduction          | 110.343  | 109.271  | 115.550  | 206.934  | 47.913   | 195.946  |
| AMK58_21570 | <a href="#">K03412 two-component system, chemotaxis family, response regulator CheB [EC:3.1.1.61]   (GenBank) g</a>   | Chemotaxis                   | 185.312  | 236.430  | 260.190  | 292.535  | 80.144   | 240.756  |
| AMK58_21575 | <a href="#">K03407 two-component system, chemotaxis family, sensor kinase CheA [EC:2.7.13.31]   (GenBank) histidi</a> | Chemotaxis                   | 37.196   | 43.228   | 42.297   | 44.370   | 18.676   | 44.182   |
| AMK58_21580 | <a href="#">no KO assigned   (GenBank) chemotaxis protein</a>                                                         | Chemotaxis                   | 46.423   | 59.093   | 62.811   | 128.724  | 59.242   | 76.788   |
| AMK58_21585 | <a href="#">K03408 purine-binding chemotaxis protein CheW   (GenBank) hypothetical protein</a>                        | Chemotaxis                   | 257.791  | 351.872  | 339.849  | 533.118  | 231.814  | 297.953  |
| AMK58_21590 | <a href="#">K00575 chemotaxis protein methyltransferase CheR [EC:2.1.1.80]   (GenBank) chemotaxis protein</a>         | Chemotaxis                   | 451.127  | 454.281  | 488.044  | 206.174  | 70.629   | 267.851  |
| AMK58_21595 | <a href="#">K03408 purine-binding chemotaxis protein CheW   (GenBank) hypothetical protein</a>                        | Chemotaxis                   | 61.114   | 84.047   | 75.650   | 57.151   | 26.182   | 32.291   |
| AMK58_21600 | <a href="#">K01579 aspartate 1-decarboxylase [EC:4.1.1.11]   (GenBank) aspartate decarboxylase</a>                    | Metabolism: Amino Acid       | 329.824  | 330.914  | 410.988  | 649.489  | 135.780  | 448.563  |
| AMK58_21605 | <a href="#">no KO assigned   (GenBank) hypothetical protein</a>                                                       | Hypothetical                 | 0.000    | 0.000    | 0.000    | 0.000    | 0.000    | 0.000    |
| AMK58_21610 | <a href="#">no KO assigned   (GenBank) hypothetical protein</a>                                                       | Hypothetical                 | 0.000    | 0.000    | 0.000    | 0.000    | 0.000    | 0.000    |
| AMK58_21615 | <a href="#">no KO assigned   (GenBank) endonuclease</a>                                                               | DNA Repair and Replication   | 0.000    | 0.000    | 0.000    | 0.000    | 0.000    | 0.000    |
| AMK58_21620 | <a href="#">no KO assigned   (GenBank) hypothetical protein</a>                                                       | Hypothetical                 | 0.000    | 0.000    | 0.000    | 0.000    | 0.000    | 0.000    |
| AMK58_21625 | <a href="#">K03411 chemotaxis protein CheD [EC:3.5.1.44]   (GenBank) chemotaxis protein</a>                           | Chemotaxis                   | 0.000    | 0.000    | 0.000    | 0.000    | 0.000    | 0.000    |
| AMK58_21630 | <a href="#">K07259 D-alanyl-D-alanine carboxypeptidase / D-alanyl-D-alanine-endopeptidase (penicillin-binding pr</a>  | Cell Wall                    | 0.000    | 0.000    | 0.000    | 0.000    | 0.000    | 0.000    |
| AMK58_21635 | <a href="#">no KO assigned   (GenBank) hypothetical protein</a>                                                       | Hypothetical                 | 0.000    | 0.000    | 0.000    | 0.000    | 0.000    | 0.000    |
| AMK58_21640 | <a href="#">no KO assigned   (GenBank) hypothetical protein</a>                                                       | Hypothetical                 | 0.000    | 0.000    | 0.000    | 0.000    | 0.000    | 0.000    |
| AMK58_21645 | <a href="#">no KO assigned   (GenBank) hypothetical protein</a>                                                       | Hypothetical                 | 0.000    | 0.000    | 0.000    | 0.000    | 0.000    | 0.000    |
| AMK58_21650 | <a href="#">no KO assigned   (GenBank) hypothetical protein</a>                                                       | Hypothetical                 | 0.000    | 0.000    | 0.000    | 0.000    | 0.000    | 0.000    |
| AMK58_21655 | <a href="#">no KO assigned   (GenBank) hypothetical protein</a>                                                       | Hypothetical                 | 0.000    | 0.000    | 0.000    | 0.000    | 0.000    | 0.000    |
| AMK58_21660 | <a href="#">no KO assigned   (GenBank) hypothetical protein</a>                                                       | Hypothetical                 | 0.000    | 0.000    | 0.000    | 0.000    | 0.000    | 0.000    |
| AMK58_21665 | <a href="#">no KO assigned   (GenBank) hypothetical protein</a>                                                       | Hypothetical                 | 0.000    | 0.000    | 0.000    | 0.000    | 0.000    | 0.000    |
| AMK58_21670 | <a href="#">no KO assigned   (GenBank) hypothetical protein</a>                                                       | Hypothetical                 | 0.000    | 0.000    | 0.000    | 0.000    | 0.000    | 0.000    |
| AMK58_21675 | <a href="#">no KO assigned   (GenBank) hypothetical protein</a>                                                       | Hypothetical                 | 0.000    | 0.000    | 0.000    | 0.000    | 0.000    | 0.000    |
| AMK58_21680 | <a href="#">no KO assigned   (GenBank) hypothetical protein</a>                                                       | Hypothetical                 | 0.000    | 0.000    | 0.000    | 0.000    | 0.000    | 0.000    |
| AMK58_21685 | <a href="#">no KO assigned   (GenBank) SapC family protein</a>                                                        | No COG                       | 0.000    | 0.000    | 0.000    | 0.000    | 0.000    | 0.000    |
| AMK58_21690 | <a href="#">no KO assigned   (GenBank) hypothetical protein</a>                                                       | Hypothetical                 | 1480.731 | 1544.406 | 1598.102 | 2087.910 | 432.331  | 1611.134 |
| AMK58_21695 | <a href="#">no KO assigned   (GenBank) hypothetical protein</a>                                                       | Hypothetical                 | 901.226  | 785.580  | 837.088  | 531.464  | 319.380  | 379.966  |
| AMK58_21700 | <a href="#">K03498 trk system potassium uptake protein   (GenBank) potassium transporter TrkH</a>                     | Transport: Inorganic         | 133.723  | 133.237  | 136.798  | 126.182  | 135.158  | 112.578  |
| AMK58_21705 | <a href="#">K14205 phosphatidylglycerol lysyltransferase [EC:2.3.2.31]   (GenBank) hypothetical protein</a>           | Defense                      | 3.548    | 4.416    | 3.725    | 21.189   | 124.627  | 97.533   |
| AMK58_21710 | <a href="#">no KO assigned   (GenBank) hypothetical protein</a>                                                       | Hypothetical                 | 361.711  | 295.370  | 349.674  | 701.454  | 318.685  | 1255.549 |
| AMK58_21715 | <a href="#">K02168 choline/glycine/proline betaine transport protein   (GenBank) beta-aspartyl peptidase</a>          | Transport                    | 2.435    | 4.000    | 5.556    | 166.100  | 58.844   | 118.592  |
| AMK58_21720 | <a href="#">no KO assigned   (GenBank) hypothetical protein</a>                                                       | Hypothetical                 | 15.587   | 14.135   | 17.863   | 41.479   | 7.665    | 49.747   |
| AMK58_21725 | <a href="#">no KO assigned   (GenBank) hypothetical protein</a>                                                       | Hypothetical                 | 27.009   | 31.531   | 32.174   | 642.506  | 271.140  | 941.050  |
| AMK58_21730 | <a href="#">no KO assigned   (GenBank) phosphoglycerate mutase</a>                                                    | Enzyme                       | 73.278   | 97.393   | 98.415   | 453.272  | 97.667   | 342.533  |
| AMK58_21735 | <a href="#">no KO assigned   (GenBank) carboxylate kinase</a>                                                         | No COG                       | 13.408   | 21.037   | 27.943   | 183.956  | 41.254   | 99.712   |
| AMK58_21740 | <a href="#">no KO assigned   (GenBank) hypothetical protein</a>                                                       | Hypothetical                 | 124.438  | 128.597  | 141.980  | 773.987  | 727.343  | 609.375  |
| AMK58_21745 | <a href="#">no KO assigned   (GenBank) arabinose ABC transporter permease</a>                                         | Membrane Transport           | 15.921   | 18.250   | 19.275   | 166.526  | 49.630   | 71.156   |
| AMK58_21750 | <a href="#">K02297 cytochrome o ubiquinol oxidase subunit II [EC:1.10.3.10]   (GenBank) cytochrome O ubiquinol o</a>  | Energy                       | 562.774  | 568.699  | 606.022  | 255.156  | 873.837  | 242.873  |
| AMK58_21755 | <a href="#">K02298 cytochrome o ubiquinol oxidase subunit I [EC:1.10.3.10]   (GenBank) cytochrome o ubiquinol ox</a>  | Energy                       | 638.191  | 752.189  | 736.658  | 94.305   | 361.966  | 139.624  |
| AMK58_21760 | <a href="#">K02299 cytochrome o ubiquinol oxidase subunit III   (GenBank) cytochrome o ubiquinol oxidase subunit</a>  | Energy                       | 3954.348 | 4466.379 | 4576.521 | 274.390  | 1308.506 | 695.154  |
| AMK58_21765 | <a href="#">K02300 cytochrome o ubiquinol oxidase subunit IV   (GenBank) hypothetical protein</a>                     | Energy                       | 1528.081 | 1715.053 | 1771.965 | 106.816  | 607.663  | 291.841  |
| AMK58_21770 | <a href="#">K14998 surffeit locus 1 family protein   (GenBank) Surffeit locus 1 family protein</a>                    | No COG                       | 717.442  | 630.220  | 723.322  | 32.020   | 345.003  | 70.189   |

|                             |                                                               |                                                                               |                                     |          |          |          |          |          |          |
|-----------------------------|---------------------------------------------------------------|-------------------------------------------------------------------------------|-------------------------------------|----------|----------|----------|----------|----------|----------|
| <a href="#">AMK58_21775</a> | <a href="#">K15011 two-component system_sen</a>               | <a href="#">histidine kinase RegB [EC:2.7.13.31] (GenBank)</a>                | Signal Transduction                 | 223.530  | 309.070  | 319.281  | 149.653  | 190.324  | 67.702   |
| <a href="#">AMK58_21780</a> | <a href="#">K15012 two-component system_response</a>          | <a href="#">regulator RegA (GenBank)</a>                                      | Signal Transduction                 | 139.213  | 131.396  | 151.767  | 421.866  | 1086.452 | 385.375  |
| <a href="#">AMK58_21785</a> | <a href="#">no KO assigned (GenBank)</a>                      | <a href="#">hypothetical protein</a>                                          | Hypothetical                        | 86.070   | 88.574   | 100.631  | 179.287  | 598.069  | 309.696  |
| <a href="#">AMK58_21790</a> | <a href="#">K03530 DNA-binding protein HU-beta</a>            | <a href="#">(GenBank) DNA-binding protein HU</a>                              | DNA Repair and Replication          | 314.794  | 317.261  | 317.261  | 272.586  | 991.331  | 343.112  |
| <a href="#">AMK58_21795</a> | <a href="#">K02569 cytochrome c-type protein NapC</a>         | <a href="#">(GenBank) cytochrome C</a>                                        | Energy                              | 218.710  | 311.664  | 193.541  | 85.460   | 402.139  | 85.142   |
| <a href="#">AMK58_21800</a> | <a href="#">K02568 cytochrome c-type protein NapB</a>         | <a href="#">(GenBank) cytochrome C</a>                                        | Energy                              | 135.864  | 131.791  | 148.248  | 231.694  | 613.406  | 300.083  |
| <a href="#">AMK58_21805</a> | <a href="#">K02567 periplasmic nitrate reductase</a>          | <a href="#">NapA [EC:1.7.99.41] (GenBank)</a>                                 | Nitrogen                            | 11.704   | 9.285    | 11.637   | 30.837   | 49.404   | 39.270   |
| <a href="#">AMK58_21810</a> | <a href="#">K02570 periplasmic nitrate reductase</a>          | <a href="#">NapD (GenBank)</a>                                                | Nitrogen                            | 694.162  | 649.872  | 707.525  | 928.836  | 1251.625 | 1521.878 |
| <a href="#">AMK58_21815</a> | <a href="#">K02572 ferredoxin-type protein NapF</a>           | <a href="#">(GenBank) ferredoxin-type protein NapF</a>                        | ferredoxin                          | 47.203   | 57.812   | 52.286   | 77.773   | 125.276  | 78.348   |
| <a href="#">AMK58_21820</a> | <a href="#">K02571 periplasmic nitrate reductase</a>          | <a href="#">NapE (GenBank)</a>                                                | Nitrogen                            | 121.836  | 250.217  | 191.141  | 596.722  | 869.627  | 303.622  |
| <a href="#">AMK58_21825</a> | <a href="#">no KO assigned (GenBank)</a>                      | <a href="#">hypothetical protein</a>                                          | Hypothetical                        | 123.917  | 152.822  | 177.272  | 153.049  | 732.859  | 134.934  |
| <a href="#">AMK58_21830</a> | <a href="#">no KO assigned (GenBank)</a>                      | <a href="#">oxalate/formate MFS antiporter</a>                                | Transport                           | 1683.933 | 2438.944 | 2157.636 | 60.774   | 1710.228 | 194.550  |
| <a href="#">AMK58_21835</a> | <a href="#">no KO assigned (GenBank)</a>                      | <a href="#">hypothetical protein</a>                                          | Hypothetical                        | 970.616  | 861.999  | 910.639  | 352.754  | 91.863   | 489.309  |
| <a href="#">AMK58_21840</a> | <a href="#">K06890 uncharacterized protein (GenBank)</a>      | <a href="#">hypothetical protein</a>                                          | Hypothetical                        | 18.756   | 24.012   | 23.406   | 115.527  | 23.906   | 148.295  |
| <a href="#">AMK58_21845</a> | <a href="#">no KO assigned (GenBank)</a>                      | <a href="#">hypothetical protein</a>                                          | Hypothetical                        | 3828.717 | 3208.668 | 3454.994 | 47.122   | 2116.035 | 97.730   |
| <a href="#">AMK58_21850</a> | <a href="#">K03088 RNA polymerase sigma-70</a>                | <a href="#">factor_ECF subfamily (GenBank)</a>                                | Transcription                       | 1663.498 | 1637.648 | 1927.804 | 175.358  | 1680.325 | 112.840  |
| <a href="#">AMK58_21855</a> | <a href="#">K03530 DNA-binding protein HU-beta</a>            | <a href="#">(GenBank) DNA-binding protein HU</a>                              | No COG                              | 2817.856 | 3428.959 | 3977.460 | 402.904  | 3788.166 | 613.741  |
| <a href="#">AMK58_21860</a> | <a href="#">no KO assigned (GenBank)</a>                      | <a href="#">hypothetical protein</a>                                          | Hypothetical                        | 960.911  | 1377.820 | 1065.916 | 339.818  | 229.702  | 298.198  |
| <a href="#">AMK58_21865</a> | <a href="#">no KO assigned (GenBank)</a>                      | <a href="#">hypothetical protein</a>                                          | Hypothetical                        | 39.390   | 40.580   | 30.084   | 95.582   | 33.388   | 99.995   |
| <a href="#">AMK58_21870</a> | <a href="#">K01420 CRP/FNR family transcriptional</a>         | <a href="#">regulator_anaerobic regulatory protein (GenBank)</a>              | Transcription                       | 48.959   | 57.315   | 50.168   | 76.218   | 54.474   | 102.147  |
| <a href="#">AMK58_21875</a> | <a href="#">no KO assigned (GenBank)</a>                      | <a href="#">hypothetical protein</a>                                          | Hypothetical                        | 169.023  | 71.340   | 59.936   | 161.070  | 6.971    | 107.034  |
| <a href="#">AMK58_21880</a> | <a href="#">K01601 ribulose-bisphosphate carboxylase</a>      | <a href="#">large chain [EC:4.1.1.39] (GenBank)</a>                           | Metabolism                          | 2.475    | 2.843    | 4.706    | 196.102  | 14.123   | 77.318   |
| <a href="#">AMK58_21885</a> | <a href="#">no KO assigned (GenBank)</a>                      | <a href="#">glvXalase</a>                                                     | No COG                              | 12.556   | 13.395   | 22.171   | 555.336  | 30.999   | 227.242  |
| <a href="#">AMK58_21890</a> | <a href="#">no KO assigned (GenBank)</a>                      | <a href="#">ABC transporter permease</a>                                      | Membrane Transport                  | 5.625    | 3.908    | 4.540    | 13.932   | 4.706    | 33.177   |
| <a href="#">AMK58_21895</a> | <a href="#">no KO assigned (GenBank)</a>                      | <a href="#">ABC transporter substrate-binding</a>                             | Membrane Transport                  | 25.683   | 29.455   | 27.036   | 360.925  | 25.260   | 260.580  |
| <a href="#">AMK58_21900</a> | <a href="#">K02529 LacI family transcriptional</a>            | <a href="#">regulator (GenBank) LacI family transcriptional regulator</a>     | Transcription                       | 24.416   | 17.984   | 25.441   | 123.656  | 20.301   | 175.744  |
| <a href="#">AMK58_21905</a> | <a href="#">no KO assigned (GenBank)</a>                      | <a href="#">hypothetical protein</a>                                          | Hypothetical                        | 13.158   | 16.629   | 20.690   | 266.581  | 35.799   | 178.787  |
| <a href="#">AMK58_21910</a> | <a href="#">no KO assigned (GenBank)</a>                      | <a href="#">3-keto-5-amino-hexanoate cleavage</a>                             | No COG                              | 25.496   | 19.902   | 29.967   | 179.863  | 32.691   | 106.923  |
| <a href="#">AMK58_21915</a> | <a href="#">K01652 acetolactate synthase I/II/III</a>         | <a href="#">large subunit [EC:2.2.1.6] (GenBank)</a>                          | Metabolism                          | 64.839   | 59.345   | 63.881   | 157.890  | 26.550   | 128.225  |
| <a href="#">AMK58_21920</a> | <a href="#">no KO assigned (GenBank)</a>                      | <a href="#">acetylpolymine aminohydrolase</a>                                 | No COG                              | 43.664   | 52.447   | 52.573   | 223.884  | 21.785   | 115.441  |
| <a href="#">AMK58_21925</a> | <a href="#">K06016 beta-ureidopropionase / N-carbamoyl-L-</a> | <a href="#">amino-acid hydrolase [EC:3.5.1.63] (GenBank)</a>                  | Metabolism: Nucleotide              | 28.152   | 27.640   | 30.886   | 99.421   | 9.626    | 63.619   |
| <a href="#">AMK58_21930</a> | <a href="#">K00077 2-dehydropanoate 2-reductase</a>           | <a href="#">[EC:1.1.1.169] (GenBank) hypothetical protein</a>                 | Metabolism: Co-Factors and Vitamins | 40.995   | 44.877   | 48.057   | 306.294  | 13.595   | 178.026  |
| <a href="#">AMK58_21935</a> | <a href="#">K02031 peptide/nickel transport system</a>        | <a href="#">ATP-binding protein K02032 peptide/nickel transport system AT</a> | Quorum sensing                      | 7.708    | 8.255    | 12.100   | 90.785   | 3.024    | 36.344   |
| <a href="#">AMK58_21940</a> | <a href="#">K02034 peptide/nickel transport system</a>        | <a href="#">permease protein (GenBank) ABC transporter permease</a>           | Quorum sensing                      | 121.768  | 148.317  | 150.459  | 298.177  | 21.981   | 294.370  |
| <a href="#">AMK58_21945</a> | <a href="#">K02033 peptide/nickel transport system</a>        | <a href="#">permease protein (GenBank) ABC transporter permease</a>           | Quorum sensing                      | 74.422   | 70.787   | 78.976   | 219.058  | 14.705   | 157.361  |
| <a href="#">AMK58_21950</a> | <a href="#">K02035 peptide/nickel transport system</a>        | <a href="#">substrate-binding protein (GenBank) peptide ABC transporter</a>   | Quorum sensing                      | 127.237  | 131.111  | 117.691  | 117.688  | 15.713   | 148.160  |
| <a href="#">AMK58_21955</a> | <a href="#">K01438 acetylornithine deacetylase</a>            | <a href="#">[EC:3.5.1.16] (GenBank) acetylornithine deacetylase</a>           | Metabolism: Amino Acid              | 901.335  | 779.506  | 815.294  | 89.733   | 113.307  | 233.682  |
| <a href="#">AMK58_21960</a> | <a href="#">no KO assigned (GenBank)</a>                      | <a href="#">LysR family transcriptional regulator</a>                         | Transcription                       | 183.854  | 257.048  | 202.466  | 231.671  | 51.631   | 214.313  |
| <a href="#">AMK58_21965</a> | <a href="#">no KO assigned (GenBank)</a>                      | <a href="#">hypothetical protein</a>                                          | Hypothetical                        | 20.566   | 25.449   | 29.987   | 70.891   | 22.682   | 78.198   |
| <a href="#">AMK58_21970</a> | <a href="#">no KO assigned (GenBank)</a>                      | <a href="#">pseudogene</a>                                                    | Pseudogene                          | 19.743   | 16.292   | 20.742   | 379.018  | 83.372   | 558.820  |
| <a href="#">AMK58_21975</a> | <a href="#">no KO assigned (GenBank)</a>                      | <a href="#">hypothetical protein</a>                                          | Hypothetical                        | 19.991   | 22.534   | 48.146   | 109.387  | 44.990   | 158.524  |
| <a href="#">AMK58_21980</a> | <a href="#">no KO assigned (GenBank)</a>                      | <a href="#">hypothetical protein</a>                                          | Hypothetical                        | 7.255    | 9.753    | 13.538   | 302.140  | 22.835   | 144.479  |
| <a href="#">AMK58_21985</a> | <a href="#">no KO assigned (GenBank)</a>                      | <a href="#">hypothetical protein</a>                                          | Hypothetical                        | 2.368    | 1.769    | 10.414   | 164.301  | 15.417   | 193.796  |
| <a href="#">AMK58_21990</a> | <a href="#">no KO assigned (GenBank)</a>                      | <a href="#">hypothetical protein</a>                                          | Hypothetical                        | 1.523    | 1.706    | 6.697    | 212.550  | 11.448   | 55.958   |
| <a href="#">AMK58_21995</a> | <a href="#">no KO assigned (GenBank)</a>                      | <a href="#">oxidoreductase</a>                                                | Oxidoreductase                      | 2.323    | 1.614    | 8.168    | 104.795  | 8.138    | 86.820   |
| <a href="#">AMK58_22000</a> | <a href="#">K16554 polysaccharide biosynthesis</a>            | <a href="#">transport protein (GenBank) hypothetical protein</a>              | Transport: polysaccharide           | 2.577    | 3.387    | 10.537   | 175.235  | 10.255   | 138.366  |
| <a href="#">AMK58_22005</a> | <a href="#">K08678 UDP-glucuronate decarboxylase</a>          | <a href="#">[EC:4.1.1.35] (GenBank) NAD-dependent dehydratase</a>             | Metabolism: Carbohydrate            | 11.367   | 10.682   | 47.845   | 383.566  | 29.573   | 418.761  |
| <a href="#">AMK58_22010</a> | <a href="#">K20997 polysaccharide biosynthesis</a>            | <a href="#">protein PslA (GenBank) hypothetical protein</a>                   | Biosynthesis: polysaccharides       | 24.486   | 8.577    | 71.437   | 50.322   | 18.648   | 120.923  |
| <a href="#">AMK58_22015</a> | <a href="#">K12454 CDP-paratose 2-epimerase</a>               | <a href="#">[EC:5.1.3.10] (GenBank) NAD-dependent epimerase</a>               | Metabolism: Carbohydrate            | 9.529    | 4.688    | 34.429   | 296.440  | 37.552   | 204.684  |
| <a href="#">AMK58_22020</a> | <a href="#">no KO assigned (GenBank)</a>                      | <a href="#">UDP-N-acetyl-D-mannosaminuronic acid</a>                          | No COG                              | 12.903   | 6.274    | 45.363   | 143.093  | 19.394   | 253.615  |
| <a href="#">AMK58_22025</a> | <a href="#">no KO assigned (GenBank)</a>                      | <a href="#">pseudogene</a>                                                    | Pseudogene                          | 3.704    | 6.407    | 14.645   | 98.200   | 6.027    | 106.304  |
| <a href="#">AMK58_22030</a> | <a href="#">K12454 CDP-paratose 2-epimerase</a>               | <a href="#">[EC:5.1.3.10] (GenBank) CDP-paratose 2-epimerase</a>              | Metabolism                          | 7.735    | 9.377    | 34.003   | 209.490  | 50.531   | 183.166  |
| <a href="#">AMK58_22035</a> | <a href="#">K01784 UDP-glucose 4-epimerase</a>                | <a href="#">[EC:5.1.3.2] (GenBank) hypothetical protein</a>                   | Metabolism: Carbohydrate            | 8.888    | 8.611    | 37.459   | 144.970  | 37.399   | 199.925  |
| <a href="#">AMK58_22040</a> | <a href="#">no KO assigned (GenBank)</a>                      | <a href="#">pseudogene</a>                                                    | Pseudogene                          | 8.741    | 6.111    | 29.885   | 117.965  | 24.877   | 168.663  |
| <a href="#">AMK58_22045</a> | <a href="#">no KO assigned (GenBank)</a>                      | <a href="#">hypothetical protein</a>                                          | Hypothetical                        | 27.134   | 17.709   | 123.357  | 523.210  | 68.175   | 453.096  |
| <a href="#">AMK58_22050</a> | <a href="#">no KO assigned (GenBank)</a>                      | <a href="#">hypothetical protein</a>                                          | Hypothetical                        | 2.489    | 3.187    | 4.226    | 121.223  | 12.590   | 42.699   |
| <a href="#">AMK58_22055</a> | <a href="#">no KO assigned (GenBank)</a>                      | <a href="#">hypothetical protein</a>                                          | Hypothetical                        | 3.476    | 5.768    | 10.649   | 239.528  | 24.093   | 243.340  |
| <a href="#">AMK58_22060</a> | <a href="#">no KO assigned (GenBank)</a>                      | <a href="#">hypothetical protein</a>                                          | Hypothetical                        | 53.395   | 49.715   | 138.195  | 158.656  | 58.927   | 150.079  |
| <a href="#">AMK58_22065</a> | <a href="#">no KO assigned (GenBank)</a>                      | <a href="#">hypothetical protein</a>                                          | Hypothetical                        | 7.959    | 12.488   | 20.486   | 42.862   | 21.779   | 101.833  |
| <a href="#">AMK58_22070</a> | <a href="#">no KO assigned (GenBank)</a>                      | <a href="#">glucoamylase</a>                                                  | Metabolism: Carbohydrates           | 4.110    | 4.428    | 9.609    | 103.340  | 21.357   | 148.693  |
| <a href="#">AMK58_22075</a> | <a href="#">no KO assigned (GenBank)</a>                      | <a href="#">hypothetical protein</a>                                          | Hypothetical                        | 4.998    | 7.324    | 10.848   | 249.973  | 181.140  | 242.551  |
| <a href="#">AMK58_22080</a> | <a href="#">K12574 ribonuclease J [EC:3.1.--] (GenBank)</a>   | <a href="#">MBL fold metallo-hydrolase</a>                                    | Genetic Information Processing      | 2.963    | 6.698    | 9.060    | 152.746  | 551.033  | 144.124  |
| <a href="#">AMK58_22085</a> | <a href="#">no KO assigned (GenBank)</a>                      | <a href="#">hypothetical protein</a>                                          | Hypothetical                        | 1391.259 | 1523.431 | 1793.414 | 1080.256 | 9282.793 | 1785.768 |
| <a href="#">AMK58_22090</a> | <a href="#">no KO assigned (GenBank)</a>                      | <a href="#">hypothetical protein</a>                                          | Hypothetical                        | 106.766  | 116.175  | 117.910  | 113.039  | 580.252  | 224.539  |
| <a href="#">AMK58_22095</a> | <a href="#">no KO assigned (GenBank)</a>                      | <a href="#">methyltransferase</a>                                             | methyltransferase                   | 58.273   | 75.276   | 63.830   | 154.274  | 175.483  | 115.738  |
| <a href="#">AMK58_22100</a> | <a href="#">no KO assigned (GenBank)</a>                      | <a href="#">hypothetical protein</a>                                          | Hypothetical                        | 1.755    | 2.995    | 2.264    | 107.117  | 63.397   | 84.841   |
| <a href="#">AMK58_22105</a> | <a href="#">no KO assigned (GenBank)</a>                      | <a href="#">hypothetical protein</a>                                          | Hypothetical                        | 4.484    | 15.309   | 18.273   | 949.088  | 399.639  | 1058.543 |

|                             |                                                                                                                                                                           |                                       |         |         |          |         |          |          |
|-----------------------------|---------------------------------------------------------------------------------------------------------------------------------------------------------------------------|---------------------------------------|---------|---------|----------|---------|----------|----------|
| <a href="#">AMK58_22110</a> | <a href="#">no KO assigned   (GenBank) hypothetical protein.</a>                                                                                                          | Hypothetical                          | 22.363  | 31.072  | 32.736   | 166.087 | 65.708   | 253.282  |
| <a href="#">AMK58_22115</a> | <a href="#">K02433 aspartyl-tRNA(Asn)/glutamyl-tRNA(Gln) amidotransferase subunit A [EC:6.3.5.6 6.3.5.7]   (GenBank) no KO assigned   (GenBank) hypothetical protein.</a> | tRNA synthesis/modification           | 8.124   | 11.359  | 8.135    | 124.447 | 10.005   | 64.589   |
| <a href="#">AMK58_22120</a> | <a href="#">no KO assigned   (GenBank) hypothetical protein.</a>                                                                                                          | Hypothetical                          | 8.761   | 9.998   | 8.704    | 111.289 | 8.741    | 40.983   |
| <a href="#">AMK58_22125</a> | <a href="#">K07127 5-hydroxyisourate hydrolase [EC:3.5.2.17]   (GenBank) 5-hydroxyisourate hydrolase.</a>                                                                 | Metabolism: Nucleotide                | 33.236  | 30.393  | 31.601   | 149.465 | 16.392   | 166.046  |
| <a href="#">AMK58_22130</a> | <a href="#">K02053 putative spermidine/putrescine transport system permease protein   (GenBank) ABC transporter.</a>                                                      | Membrane Transport                    | 9.348   | 11.524  | 12.697   | 119.453 | 16.511   | 128.505  |
| <a href="#">AMK58_22135</a> | <a href="#">K02054 putative spermidine/putrescine transport system permease protein   (GenBank) ABC transporter.</a>                                                      | Membrane Transport                    | 8.833   | 16.237  | 12.403   | 232.994 | 27.952   | 197.700  |
| <a href="#">AMK58_22140</a> | <a href="#">K02055 putative spermidine/putrescine transport system substrate-binding protein   (GenBank) ABC tra.</a>                                                     | Quorum sensing                        | 7.401   | 4.836   | 7.367    | 219.346 | 41.465   | 257.673  |
| <a href="#">AMK58_22145</a> | <a href="#">K02052 putative spermidine/putrescine transport system ATP-binding protein   (GenBank) Fe3+/spermid.</a>                                                      | Quorum sensing                        | 1.237   | 1.343   | 3.314    | 155.409 | 22.366   | 89.336   |
| <a href="#">AMK58_22150</a> | <a href="#">K07395 putative proteasome-type protease   (GenBank) peptidase.</a>                                                                                           | peptidase                             | 236.055 | 245.055 | 202.985  | 127.321 | 92.951   | 262.115  |
| <a href="#">AMK58_22155</a> | <a href="#">no KO assigned   (GenBank) GntR family transcriptional regulator.</a>                                                                                         | Transcription                         | 21.783  | 21.186  | 27.455   | 220.093 | 64.345   | 210.447  |
| <a href="#">AMK58_22160</a> | <a href="#">no KO assigned   (GenBank) ABC transporter substrate-binding protein.</a>                                                                                     | Membrane Transport                    | 6.806   | 7.847   | 8.174    | 104.445 | 63.215   | 274.917  |
| <a href="#">AMK58_22165</a> | <a href="#">K02050 NitT/TauT family transport system permease protein   (GenBank) ABC transporter permease.</a>                                                           | Transport: NitT/TauT                  | 1.650   | 2.689   | 3.994    | 164.598 | 25.802   | 169.865  |
| <a href="#">AMK58_22170</a> | <a href="#">K02049 NitT/TauT family transport system ATP-binding protein   (GenBank) ABC transporter ATP-bindin</a>                                                       | Transport: NitT/TauT                  | 1.392   | 4.619   | 2.793    | 142.715 | 18.076   | 155.428  |
| <a href="#">AMK58_22175</a> | <a href="#">K12960 5-methylthioadenosine/S-adenosylhomocysteine deaminase [EC:3.5.4.31 3.5.4.28]   (GenBank) hv</a>                                                       | Metabolism: Amino Acid                | 0.727   | 0.543   | 3.111    | 166.569 | 10.217   | 90.102   |
| <a href="#">AMK58_22180</a> | <a href="#">K01799 maleate isomerase [EC:5.2.1.1]   (GenBank) Asp/Glu/hydantoine racemase.</a>                                                                            | Metabolism: Carbohydrates             | 2.646   | 0.988   | 6.605    | 186.115 | 35.139   | 215.030  |
| <a href="#">AMK58_22185</a> | <a href="#">K01464 dihydroxyrimidinease [EC:3.5.2.2]   (GenBank) dihydroxyrimidinease.</a>                                                                                | Metabolism                            | 6.151   | 9.061   | 9.934    | 182.501 | 25.287   | 154.302  |
| <a href="#">AMK58_22190</a> | <a href="#">K01426 amidase [EC:3.5.1.4]   (GenBank) glutamyl-tRNA amidotransferase.</a>                                                                                   | tRNA synthesis/modification           | 14.053  | 19.453  | 16.376   | 145.772 | 32.362   | 92.168   |
| <a href="#">AMK58_22195</a> | <a href="#">no KO assigned   (GenBank) hypothetical protein.</a>                                                                                                          | Hypothetical                          | 66.352  | 104.212 | 86.502   | 248.777 | 49.978   | 231.517  |
| <a href="#">AMK58_22200</a> | <a href="#">no KO assigned   (GenBank) hypothetical protein.</a>                                                                                                          | Hypothetical                          | 7.532   | 5.519   | 8.242    | 182.174 | 11.820   | 161.421  |
| <a href="#">AMK58_22205</a> | <a href="#">K02182 crotonobetaine/carnitine-CoA ligase [EC:6.2.1.-]   (GenBank) ATP-dependent acyl-CoA ligase.</a>                                                        | Enzyme                                | 7.676   | 9.928   | 9.556    | 210.418 | 27.841   | 130.468  |
| <a href="#">AMK58_22210</a> | <a href="#">no KO assigned   (GenBank) ABC transporter permease.</a>                                                                                                      | Membrane Transport                    | 12.586  | 13.486  | 15.024   | 226.694 | 21.452   | 149.566  |
| <a href="#">AMK58_22215</a> | <a href="#">K02052 putative spermidine/putrescine transport system ATP-binding protein   (GenBank) ABC transport</a>                                                      | Membrane Transport                    | 26.540  | 20.967  | 27.007   | 162.333 | 34.763   | 212.133  |
| <a href="#">AMK58_22220</a> | <a href="#">K02055 putative spermidine/putrescine transport system substrate-binding protein   (GenBank) ABC tra.</a>                                                     | Quorum sensing                        | 34.400  | 32.910  | 42.114   | 150.892 | 34.624   | 179.506  |
| <a href="#">AMK58_22225</a> | <a href="#">no KO assigned   (GenBank) enoyl-CoA hydratase.</a>                                                                                                           | hydratase                             | 29.052  | 33.775  | 37.178   | 237.073 | 43.599   | 221.045  |
| <a href="#">AMK58_22230</a> | <a href="#">no KO assigned   (GenBank) IclR family transcriptional regulator.</a>                                                                                         | Transcription                         | 26.541  | 22.068  | 19.772   | 73.121  | 27.526   | 220.099  |
| <a href="#">AMK58_22235</a> | <a href="#">K01977 16S ribosomal RNA   (GenBank) 16S ribosomal RNA.</a>                                                                                                   | Ribosome                              | 0.000   | 0.000   | 0.000    | 0.000   | 0.000    | 0.000    |
| <a href="#">AMK58_22240</a> | <a href="#">K14227 tRNA Ile   (GenBank) tRNA-Ile.</a>                                                                                                                     | tRNA synthesis/modification           | 0.000   | 0.000   | 0.000    | 0.000   | 0.000    | 0.000    |
| <a href="#">AMK58_22245</a> | <a href="#">K14218 tRNA Ala   (GenBank) tRNA-Ala.</a>                                                                                                                     | tRNA synthesis/modification           | 0.000   | 0.000   | 0.000    | 0.000   | 0.000    | 0.000    |
| <a href="#">AMK58_22250</a> | <a href="#">K01980 23S ribosomal RNA   (GenBank) 23S ribosomal RNA.</a>                                                                                                   | Ribosome                              | 3.167   | 27.852  | 3.596    | 4.124   | 6.229    | 0.652    |
| <a href="#">AMK58_22255</a> | <a href="#">K01985 5S ribosomal RNA   (GenBank) 5S ribosomal RNA.</a>                                                                                                     | Ribosome                              | 0.000   | 0.000   | 0.000    | 11.185  | 0.000    | 120.980  |
| <a href="#">AMK58_22260</a> | <a href="#">K14230 tRNA Met   (GenBank) tRNA-Met.</a>                                                                                                                     | tRNA synthesis/modification           | 113.213 | 169.096 | 103.159  | 267.501 | 625.675  | 304.732  |
| <a href="#">AMK58_22265</a> | <a href="#">no KO assigned   (GenBank) hypothetical protein.</a>                                                                                                          | Hypothetical                          | 6.342   | 3.445   | 8.223    | 128.204 | 25.923   | 375.836  |
| <a href="#">AMK58_22270</a> | <a href="#">K20276 large repetitive protein   (GenBank) hypothetical protein.</a>                                                                                         | Quorum sensing                        | 10.032  | 14.288  | 17.436   | 142.729 | 27.956   | 134.559  |
| <a href="#">AMK58_22275</a> | <a href="#">no KO assigned   (GenBank) riboflavin biosynthesis protein RibD.</a>                                                                                          | Biosynthesis: Co-Factors and Vitamins | 29.761  | 15.612  | 57.007   | 190.578 | 116.511  | 243.116  |
| <a href="#">AMK58_22280</a> | <a href="#">no KO assigned   (GenBank) pyrroloquinoline quinone biosynthesis protein PqqA.</a>                                                                            | Biosynthesis: quinone                 | 735.417 | 446.516 | 1219.408 | 242.278 | 2021.236 | 1054.780 |
| <a href="#">AMK58_22285</a> | <a href="#">no KO assigned   (GenBank) hypothetical protein.</a>                                                                                                          | Hypothetical                          | 9.913   | 6.345   | 15.484   | 69.711  | 68.842   | 265.902  |
| <a href="#">AMK58_22290</a> | <a href="#">K17226 sulfur-oxidizing protein SoxY   (GenBank) quinoprotein dehydrogenase-associated SoxYZ-like ca</a>                                                      | Energy                                | 8.742   | 13.927  | 15.238   | 144.230 | 62.724   | 186.846  |
| <a href="#">AMK58_22295</a> | <a href="#">no KO assigned   (GenBank) MBL fold metallo-hydrolase.</a>                                                                                                    | No COG                                | 4.235   | 5.209   | 12.317   | 280.989 | 77.988   | 150.963  |
| <a href="#">AMK58_22300</a> | <a href="#">no KO assigned   (GenBank) pseudogene.</a>                                                                                                                    | Pseudogene                            | 0.592   | 0.707   | 2.926    | 181.845 | 26.474   | 77.261   |
| <a href="#">AMK58_22305</a> | <a href="#">no KO assigned   (GenBank) hypothetical protein.</a>                                                                                                          | Hypothetical                          | 2.303   | 1.448   | 4.148    | 134.749 | 32.014   | 119.125  |
| <a href="#">AMK58_22310</a> | <a href="#">K01814 phosphoribosylformimino-5-aminoimidazole carboxamide ribotide isomerase [EC:5.3.1.16]   (Gen</a>                                                       | Metabolism: Amino Acid                | 3.762   | 2.043   | 9.431    | 233.658 | 37.676   | 95.461   |
| <a href="#">AMK58_22315</a> | <a href="#">K10713 5,6,7,8-tetrahydromethanopterin hydro-lyase [EC:4.2.1.147]   (GenBank) aldehyde-activating pr.</a>                                                     | Metabolism                            | 36.647  | 30.486  | 60.647   | 96.317  | 190.583  | 155.070  |
| <a href="#">AMK58_22320</a> | <a href="#">K05966 triphosphoribosyl-dephospho-CoA synthase [EC:2.4.2.52]   (GenBank) hypothetical protein.</a>                                                           | Signal transduction                   | 4.408   | 4.115   | 8.644    | 203.701 | 36.075   | 175.876  |
| <a href="#">AMK58_22325</a> | <a href="#">no KO assigned   (GenBank) alpha-L-glutamate ligase.</a>                                                                                                      | Enzyme                                | 0.682   | 3.258   | 4.278    | 118.534 | 7.663    | 40.458   |
| <a href="#">AMK58_22330</a> | <a href="#">K01499 methenyltetrahydromethanopterin cyclohydrolase [EC:3.5.4.27]   (GenBank) methenyltetrahydrom</a>                                                       | Metabolism: Carbon                    | 4.280   | 8.037   | 9.419    | 200.521 | 27.081   | 101.270  |
| <a href="#">AMK58_22335</a> | <a href="#">no KO assigned   (GenBank) pseudogene.</a>                                                                                                                    | Pseudogene                            | 3.793   | 3.148   | 8.216    | 164.162 | 18.596   | 84.129   |
| <a href="#">AMK58_22340</a> | <a href="#">K10714 methylene-tetrahydromethanopterin dehydrogenase [EC:1.5.1.-]   (GenBank) methylenetetrahydros</a>                                                      | Energy                                | 6.749   | 8.064   | 12.064   | 162.186 | 21.241   | 60.203   |
| <a href="#">AMK58_22345</a> | <a href="#">no KO assigned   (GenBank) GHMP kinase.</a>                                                                                                                   | No COG                                | 14.344  | 13.073  | 29.473   | 181.401 | 12.571   | 75.635   |
| <a href="#">AMK58_22350</a> | <a href="#">K01724 4a-hydroxytetrahydrobiopterin dehydratase [EC:4.2.1.96]   (GenBank) pterin dehydratase.</a>                                                            | dehydratase                           | 99.294  | 133.955 | 86.491   | 136.442 | 151.215  | 250.676  |
| <a href="#">AMK58_22355</a> | <a href="#">K00201 formylmethanofuran dehydrogenase subunit B [EC:1.2.99.51]   (GenBank) formylmethanofuran de</a>                                                        | Metabolism: Carbon                    | 16.088  | 21.112  | 21.397   | 112.733 | 93.342   | 100.629  |
| <a href="#">AMK58_22360</a> | <a href="#">K00200 formylmethanofuran dehydrogenase subunit A [EC:1.2.99.51]   (GenBank) formylmethanofuran de</a>                                                        | Metabolism                            | 10.346  | 15.782  | 12.489   | 148.916 | 61.531   | 168.064  |
| <a href="#">AMK58_22365</a> | <a href="#">K00672 formylmethanofuran--tetrahydromethanopterin N-formyltransferase [EC:2.3.1.101]   (GenBank) fc</a>                                                      | Metabolism: Carbon                    | 6.995   | 8.841   | 9.593    | 218.230 | 38.409   | 106.282  |
| <a href="#">AMK58_22370</a> | <a href="#">K00202 formylmethanofuran dehydrogenase subunit C [EC:1.2.99.51]   (GenBank) hypothetical protein.</a>                                                        | Metabolism: Carbon                    | 7.778   | 8.768   | 10.884   | 178.699 | 27.219   | 61.238   |
| <a href="#">AMK58_22375</a> | <a href="#">no KO assigned   (GenBank) branched-chain amino acid ABC transporter substrate-binding protein.</a>                                                           | Membrane Transport                    | 6.404   | 6.074   | 10.536   | 212.435 | 26.739   | 93.982   |
| <a href="#">AMK58_22380</a> | <a href="#">no KO assigned   (GenBank) hypothetical protein.</a>                                                                                                          | Hypothetical                          | 60.229  | 58.252  | 79.562   | 95.724  | 66.174   | 190.893  |
| <a href="#">AMK58_22385</a> | <a href="#">K01990 ABC-2 type transport system ATP-binding protein   (GenBank) ABC transporter ATP-binding pr</a>                                                         | Membrane Transport                    | 12.341  | 13.949  | 16.491   | 228.981 | 31.305   | 94.486   |
| <a href="#">AMK58_22390</a> | <a href="#">K01992 ABC-2 type transport system permease protein   (GenBank) multidrug ABC transporter permease.</a>                                                       | Membrane Transport                    | 10.386  | 15.070  | 15.660   | 255.005 | 43.697   | 180.099  |
| <a href="#">AMK58_22395</a> | <a href="#">no KO assigned   (GenBank) hypothetical protein.</a>                                                                                                          | Hypothetical                          | 15.217  | 11.858  | 12.581   | 380.206 | 1445.711 | 278.527  |
| <a href="#">AMK58_22400</a> | <a href="#">no KO assigned   (GenBank) hypothetical protein.</a>                                                                                                          | Hypothetical                          | 5.381   | 3.572   | 9.096    | 339.189 | 682.482  | 149.693  |
| <a href="#">AMK58_22405</a> | <a href="#">no KO assigned   (GenBank) hypothetical protein.</a>                                                                                                          | Hypothetical                          | 1.546   | 3.078   | 6.368    | 168.627 | 221.031  | 111.792  |
| <a href="#">AMK58_22410</a> | <a href="#">K09154 uncharacterized protein   (GenBank) tetrahydromethanopterin synthesis protein.</a>                                                                     | Biosynthesis                          | 3.776   | 5.640   | 6.732    | 223.835 | 188.620  | 137.000  |
| <a href="#">AMK58_22415</a> | <a href="#">no KO assigned   (GenBank) dihydropterotate synthase.</a>                                                                                                     | No COG                                | 4.868   | 2.644   | 8.668    | 227.511 | 107.641  | 148.298  |
| <a href="#">AMK58_22420</a> | <a href="#">no KO assigned   (GenBank) hypothetical protein.</a>                                                                                                          | Hypothetical                          | 2.829   | 2.253   | 6.635    | 166.481 | 46.212   | 75.021   |
| <a href="#">AMK58_22425</a> | <a href="#">K01633 dihydroneopterin aldolase / 7,8-dihydroneopterin epimerase [EC:4.1.2.25 5.1.99.8]   (GenBank).</a>                                                     | Metabolism: Co-Factors and Vitamins   | 21.988  | 24.943  | 19.848   | 121.173 | 119.825  | 191.246  |
| <a href="#">AMK58_22430</a> | <a href="#">no KO assigned   (GenBank) hypothetical protein.</a>                                                                                                          | Hypothetical                          | 4.981   | 2.771   | 7.498    | 265.339 | 48.493   | 176.362  |
| <a href="#">AMK58_22435</a> | <a href="#">no KO assigned   (GenBank) hypothetical protein.</a>                                                                                                          | Hypothetical                          | 18.065  | 25.260  | 34.536   | 287.816 | 76.687   | 191.928  |
| <a href="#">AMK58_22440</a> | <a href="#">no KO assigned   (GenBank) hypothetical protein.</a>                                                                                                          | Hypothetical                          | 12.170  | 13.672  | 19.681   | 161.071 | 56.472   | 163.582  |

|                             |                                                                                                                                     |                             |         |         |         |         |          |         |
|-----------------------------|-------------------------------------------------------------------------------------------------------------------------------------|-----------------------------|---------|---------|---------|---------|----------|---------|
| <a href="#">AMK58_22445</a> | <a href="#">no KO assigned   (GenBank) hypothetical protein</a>                                                                     | Hypothetical                | 62.555  | 55.113  | 66.330  | 162.958 | 103.042  | 314.890 |
| <a href="#">AMK58_22450</a> | <a href="#">no KO assigned   (GenBank) methanol dehydrogenase</a>                                                                   | dehydrogenase               | 237.908 | 212.706 | 267.083 | 103.992 | 317.045  | 185.626 |
| <a href="#">AMK58_22455</a> | <a href="#">no KO assigned   (GenBank) hypothetical protein</a>                                                                     | Hypothetical                | 2.484   | 7.419   | 4.132   | 93.985  | 28.614   | 269.447 |
| <a href="#">AMK58_22460</a> | <a href="#">no KO assigned   (GenBank) hypothetical protein</a>                                                                     | Hypothetical                | 58.050  | 36.333  | 56.771  | 132.563 | 101.293  | 222.077 |
| <a href="#">AMK58_22465</a> | <a href="#">K02334 DNA polymerase bacteriophage-type [EC:2.7.7.7]   (GenBank) DNA polymerase</a>                                    | DNA Repair and Replication  | 2.707   | 1.011   | 4.103   | 210.921 | 25.012   | 97.755  |
| <a href="#">AMK58_22470</a> | <a href="#">no KO assigned   (GenBank) hypothetical protein</a>                                                                     | Hypothetical                | 5.481   | 4.763   | 6.727   | 206.236 | 67.543   | 175.196 |
| <a href="#">AMK58_22475</a> | <a href="#">no KO assigned   (GenBank) 6-aminohexanoate hydrolase</a>                                                               | hydrolase                   | 20.582  | 25.417  | 25.582  | 255.832 | 380.751  | 162.807 |
| <a href="#">AMK58_22480</a> | <a href="#">K02004 putative ABC transport system permease protein I   (GenBank) hypothetical protein</a>                            | Membrane Transport          | 9.053   | 10.818  | 13.773  | 199.014 | 100.155  | 67.070  |
| <a href="#">AMK58_22485</a> | <a href="#">K07107 acyl-CoA thioester hydrolase [EC:3.1.2.-]   (GenBank) thioesterase</a>                                           | hydrolase                   | 11.985  | 13.152  | 12.326  | 252.617 | 65.435   | 119.754 |
| <a href="#">AMK58_22490</a> | <a href="#">no KO assigned   (GenBank) LysR family transcriptional regulator</a>                                                    | Transcription               | 26.246  | 39.398  | 44.016  | 320.132 | 97.548   | 166.448 |
| <a href="#">AMK58_22495</a> | <a href="#">no KO assigned   (GenBank) hypothetical protein</a>                                                                     | Hypothetical                | 4.227   | 3.608   | 7.464   | 299.026 | 36.201   | 178.530 |
| <a href="#">AMK58_22500</a> | <a href="#">no KO assigned   (GenBank) hypothetical protein</a>                                                                     | Hypothetical                | 14.042  | 16.157  | 25.219  | 273.654 | 48.638   | 161.942 |
| <a href="#">AMK58_22505</a> | <a href="#">K07068 uncharacterized protein I   (GenBank) hypothetical protein</a>                                                   | Hypothetical                | 8.734   | 7.198   | 16.609  | 269.099 | 33.515   | 189.909 |
| <a href="#">AMK58_22510</a> | <a href="#">no KO assigned   (GenBank) hypothetical protein</a>                                                                     | Hypothetical                | 13.184  | 12.860  | 22.001  | 139.119 | 35.082   | 159.922 |
| <a href="#">AMK58_22515</a> | <a href="#">K00059 3-oxoacyl-[acyl-carrier protein] reductase [EC:1.1.1.100]   (GenBank) 3-oxoacyl-ACP reductase</a>                | Metabolism: Lipid           | 7.852   | 15.011  | 10.900  | 143.464 | 17.652   | 95.815  |
| <a href="#">AMK58_22520</a> | <a href="#">K02012 iron(III) transport system substrate-binding protein I   (GenBank) ABC transporter substrate-binding protein</a> | Transport: Metal            | 68.449  | 66.445  | 81.979  | 173.858 | 59.154   | 175.847 |
| <a href="#">AMK58_22525</a> | <a href="#">K02011 iron(III) transport system permease protein I   (GenBank) ABC transporter substrate-binding protein</a>          | Transport: Metal            | 16.130  | 15.322  | 21.561  | 195.816 | 22.303   | 138.741 |
| <a href="#">AMK58_22530</a> | <a href="#">K02010 iron(III) transport system ATP-binding protein [EC:3.6.3.30]   (GenBank) sulfate ABC transporter</a>             | Transport: Metal            | 11.323  | 12.056  | 17.481  | 168.793 | 19.028   | 119.442 |
| <a href="#">AMK58_22535</a> | <a href="#">no KO assigned   (GenBank) enoyl-CoA hydratase</a>                                                                      | hydratase                   | 5.045   | 4.432   | 8.182   | 197.366 | 16.178   | 104.290 |
| <a href="#">AMK58_22540</a> | <a href="#">no KO assigned   (GenBank) hypothetical protein</a>                                                                     | Hypothetical                | 9.879   | 13.268  | 10.704  | 156.749 | 18.852   | 83.439  |
| <a href="#">AMK58_22545</a> | <a href="#">no KO assigned   (GenBank) hypothetical protein</a>                                                                     | Hypothetical                | 8.957   | 10.823  | 9.378   | 139.132 | 22.513   | 81.473  |
| <a href="#">AMK58_22550</a> | <a href="#">no KO assigned   (GenBank) hypothetical protein</a>                                                                     | Hypothetical                | 24.872  | 25.233  | 25.210  | 131.069 | 35.078   | 159.701 |
| <a href="#">AMK58_22555</a> | <a href="#">no KO assigned   (GenBank) hypothetical protein</a>                                                                     | Hypothetical                | 45.674  | 38.792  | 35.195  | 132.597 | 32.342   | 115.664 |
| <a href="#">AMK58_22560</a> | <a href="#">K04063 osmotically inducible protein OsmC I   (GenBank) peroxiredoxin</a>                                               | Stress Response             | 65.937  | 49.243  | 91.068  | 266.883 | 436.393  | 319.679 |
| <a href="#">AMK58_22565</a> | <a href="#">no KO assigned   (GenBank) acyl carrier protein</a>                                                                     | No COG                      | 16.849  | 7.023   | 42.099  | 370.561 | 128.606  | 196.199 |
| <a href="#">AMK58_22570</a> | <a href="#">no KO assigned   (GenBank) acyl-CoA dehydrogenase</a>                                                                   | dehydrogenase               | 7.870   | 8.439   | 19.666  | 182.189 | 107.854  | 124.245 |
| <a href="#">AMK58_22575</a> | <a href="#">no KO assigned   (GenBank) hypothetical protein</a>                                                                     | Hypothetical                | 8.264   | 7.406   | 16.895  | 212.373 | 156.066  | 239.866 |
| <a href="#">AMK58_22580</a> | <a href="#">no KO assigned   (GenBank) serine-tRNA ligase</a>                                                                       | tRNA synthesis/modification | 4.156   | 3.204   | 11.219  | 213.913 | 74.603   | 165.607 |
| <a href="#">AMK58_22585</a> | <a href="#">K01192 beta-mannosidase [EC:3.2.1.25]   (GenBank) beta-mannosidase</a>                                                  | Metabolism                  | 1.339   | 2.074   | 4.007   | 177.860 | 36.280   | 63.215  |
| <a href="#">AMK58_22590</a> | <a href="#">no KO assigned   (GenBank) hypothetical protein</a>                                                                     | Hypothetical                | 5.078   | 7.186   | 7.814   | 189.754 | 23.508   | 57.312  |
| <a href="#">AMK58_22595</a> | <a href="#">no KO assigned   (GenBank) hypothetical protein</a>                                                                     | Hypothetical                | 217.653 | 163.202 | 151.649 | 150.146 | 104.001  | 195.777 |
| <a href="#">AMK58_22600</a> | <a href="#">no KO assigned   (GenBank) hypothetical protein</a>                                                                     | Hypothetical                | 408.109 | 274.920 | 246.376 | 81.851  | 249.716  | 306.731 |
| <a href="#">AMK58_22605</a> | <a href="#">no KO assigned   (GenBank) hypothetical protein</a>                                                                     | Hypothetical                | 306.035 | 256.256 | 227.141 | 211.399 | 135.890  | 217.827 |
| <a href="#">AMK58_22610</a> | <a href="#">no KO assigned   (GenBank) acetyltransferase</a>                                                                        | Acetyltransferase           | 133.820 | 157.362 | 114.109 | 85.076  | 100.757  | 223.751 |
| <a href="#">AMK58_22615</a> | <a href="#">no KO assigned   (GenBank) hypothetical protein</a>                                                                     | Hypothetical                | 137.457 | 141.304 | 170.476 | 105.155 | 19.574   | 147.168 |
| <a href="#">AMK58_22620</a> | <a href="#">no KO assigned   (GenBank) hypothetical protein</a>                                                                     | Hypothetical                | 155.939 | 171.558 | 193.668 | 172.437 | 19.778   | 195.729 |
| <a href="#">AMK58_22625</a> | <a href="#">no KO assigned   (GenBank) hypothetical protein</a>                                                                     | Hypothetical                | 54.887  | 62.155  | 65.490  | 137.918 | 22.783   | 148.861 |
| <a href="#">AMK58_22630</a> | <a href="#">no KO assigned   (GenBank) hypothetical protein</a>                                                                     | Hypothetical                | 45.426  | 54.603  | 62.033  | 178.307 | 23.394   | 117.220 |
| <a href="#">AMK58_22635</a> | <a href="#">K16922 putative peptide zinc metalloprotease protein I   (GenBank) peptidase</a>                                        | peptidase                   | 46.022  | 49.603  | 55.416  | 174.118 | 35.105   | 176.562 |
| <a href="#">AMK58_22640</a> | <a href="#">no KO assigned   (GenBank) hypothetical protein</a>                                                                     | Hypothetical                | 50.690  | 55.939  | 69.992  | 115.909 | 75.849   | 245.796 |
| <a href="#">AMK58_22645</a> | <a href="#">no KO assigned   (GenBank) hypothetical protein</a>                                                                     | Hypothetical                | 15.212  | 19.289  | 24.972  | 156.114 | 63.231   | 183.777 |
| <a href="#">AMK58_22650</a> | <a href="#">no KO assigned   (GenBank) hypothetical protein</a>                                                                     | Hypothetical                | 29.102  | 39.366  | 41.244  | 176.529 | 99.061   | 110.742 |
| <a href="#">AMK58_22655</a> | <a href="#">no KO assigned   (GenBank) hypothetical protein</a>                                                                     | Hypothetical                | 31.950  | 42.926  | 37.937  | 217.477 | 249.332  | 109.435 |
| <a href="#">AMK58_22660</a> | <a href="#">K06966 uncharacterized protein I   (GenBank) 3-isopropylmalate dehydrogenase</a>                                        | No COG                      | 138.451 | 157.397 | 122.447 | 118.824 | 237.533  | 131.501 |
| <a href="#">AMK58_22665</a> | <a href="#">no KO assigned   (GenBank) histidine kinase</a>                                                                         | Signal Transduction         | 16.934  | 19.992  | 20.536  | 237.981 | 86.284   | 126.374 |
| <a href="#">AMK58_22670</a> | <a href="#">no KO assigned   (GenBank) hypothetical protein</a>                                                                     | Hypothetical                | 65.690  | 78.235  | 84.910  | 221.136 | 149.123  | 127.796 |
| <a href="#">AMK58_22675</a> | <a href="#">K06886 hemoglobin I   (GenBank) preprotein translocase</a>                                                              | No COG                      | 122.700 | 114.895 | 138.555 | 96.876  | 237.478  | 193.144 |
| <a href="#">AMK58_22680</a> | <a href="#">K00782 L-lactate dehydrogenase complex protein LldG   (GenBank) lactate utilization protein B/C</a>                     | No COG                      | 26.049  | 24.112  | 38.199  | 154.568 | 53.819   | 249.035 |
| <a href="#">AMK58_22685</a> | <a href="#">K18929 L-lactate dehydrogenase complex protein LldF   (GenBank) (Fe-S)-binding protein</a>                              | No COG                      | 32.457  | 27.919  | 33.445  | 142.837 | 29.511   | 164.426 |
| <a href="#">AMK58_22690</a> | <a href="#">K18928 L-lactate dehydrogenase complex protein LldE   (GenBank) oxidoreductase</a>                                      | oxidoreductase              | 58.849  | 62.441  | 64.821  | 101.662 | 47.714   | 166.094 |
| <a href="#">AMK58_22695</a> | <a href="#">K18930 D-lactate dehydrogenase I   (GenBank) 4Fe-4S ferredoxin</a>                                                      | ferredoxin                  | 7.162   | 5.789   | 8.211   | 195.763 | 26.423   | 180.671 |
| <a href="#">AMK58_22700</a> | <a href="#">no KO assigned   (GenBank) L-lactate permease</a>                                                                       | Membrane transport          | 3.082   | 2.998   | 5.316   | 143.557 | 29.330   | 259.570 |
| <a href="#">AMK58_22705</a> | <a href="#">no KO assigned   (GenBank) GntR family transcriptional regulator</a>                                                    | Transcription               | 29.480  | 46.152  | 30.728  | 271.788 | 86.121   | 247.198 |
| <a href="#">AMK58_22710</a> | <a href="#">K02351 putative membrane protein I   (GenBank) hypothetical protein</a>                                                 | Membrane                    | 17.770  | 16.195  | 18.471  | 207.574 | 101.224  | 221.188 |
| <a href="#">AMK58_22715</a> | <a href="#">no KO assigned   (GenBank) SAM-dependent methyltransferase</a>                                                          | methyltransferase           | 35.670  | 13.395  | 33.722  | 157.817 | 112.265  | 251.189 |
| <a href="#">AMK58_22720</a> | <a href="#">K03695 ATP-dependent Clp protease ATP-binding subunit ClpB I   (GenBank) ATP-dependent chaperone C</a>                  | Chaperone                   | 88.335  | 88.862  | 109.945 | 228.397 | 1485.659 | 215.667 |
| <a href="#">AMK58_22725</a> | <a href="#">no KO assigned   (GenBank) transcriptional regulator</a>                                                                | Transcription               | 54.340  | 66.308  | 64.549  | 241.927 | 113.735  | 171.479 |
| <a href="#">AMK58_22730</a> | <a href="#">K00883 2-dehydro-3-deoxygalactonokinase [EC:2.7.1.58]   (GenBank) 2-keto-3-deoxy-galactonokinase</a>                    | Metabolism: Carbohydrate    | 23.654  | 16.026  | 32.461  | 173.619 | 67.567   | 85.022  |
| <a href="#">AMK58_22735</a> | <a href="#">K01631 2-dehydro-3-deoxyphosphogalactonate aldolase [EC:4.1.2.21]   (GenBank) 2-dehydro-3-deoxy-6-</a>                  | Metabolism: Carbohydrate    | 24.736  | 27.779  | 35.897  | 204.539 | 74.841   | 82.607  |
| <a href="#">AMK58_22740</a> | <a href="#">no KO assigned   (GenBank) ABC transporter substrate-binding protein</a>                                                | Membrane Transport          | 676.189 | 615.526 | 750.180 | 141.703 | 151.027  | 222.796 |
| <a href="#">AMK58_22745</a> | <a href="#">no KO assigned   (GenBank) hypothetical protein</a>                                                                     | Hypothetical                | 165.445 | 133.955 | 201.963 | 156.495 | 96.830   | 213.816 |
| <a href="#">AMK58_22750</a> | <a href="#">K07793 putative tricarboxylic transport membrane protein I   (GenBank) C4-dicarboxylate ABC transporter</a>             | Membrane                    | 107.047 | 91.297  | 121.676 | 156.412 | 79.367   | 195.327 |
| <a href="#">AMK58_22755</a> | <a href="#">no KO assigned   (GenBank) gluconolactonase</a>                                                                         | enzyme                      | 86.152  | 91.739  | 106.204 | 188.034 | 118.375  | 224.161 |
| <a href="#">AMK58_22760</a> | <a href="#">K00059 3-oxoacyl-[acyl-carrier protein] reductase [EC:1.1.1.100]   (GenBank) 3-ketoacyl-ACP synthase</a>                | Metabolism: Lipid           | 106.427 | 126.610 | 127.564 | 200.384 | 190.566  | 163.709 |
| <a href="#">AMK58_22765</a> | <a href="#">no KO assigned   (GenBank) hypothetical protein</a>                                                                     | Hypothetical                | 25.708  | 39.636  | 50.463  | 228.097 | 72.397   | 150.462 |
| <a href="#">AMK58_22770</a> | <a href="#">no KO assigned   (GenBank) hypothetical protein</a>                                                                     | Hypothetical                | 16.537  | 27.052  | 20.590  | 96.652  | 65.170   | 293.909 |
| <a href="#">AMK58_22775</a> | <a href="#">K07814 putative two-component system response regulator I   (GenBank) hypothetical protein</a>                          | Hypothetical                | 18.102  | 14.183  | 22.854  | 92.223  | 77.053   | 105.390 |

|                             |                                                                                                                      |                                     |          |          |          |         |          |         |
|-----------------------------|----------------------------------------------------------------------------------------------------------------------|-------------------------------------|----------|----------|----------|---------|----------|---------|
| <a href="#">AMK58_22780</a> | <a href="#">no KO assigned   (GenBank) hypothetical protein</a>                                                      | Hypothetical                        | 15.060   | 21.898   | 19.546   | 167.469 | 58.620   | 144.890 |
| <a href="#">AMK58_22785</a> | <a href="#">no KO assigned   (GenBank) hypothetical protein</a>                                                      | Hypothetical                        | 21.375   | 25.898   | 30.841   | 258.696 | 49.733   | 177.691 |
| <a href="#">AMK58_22790</a> | <a href="#">K02030 polar amino acid transport system substrate-binding protein   (GenBank) hypothetical protein</a>  | Transport: Amino Acid               | 66.936   | 89.194   | 71.286   | 101.531 | 58.273   | 220.128 |
| <a href="#">AMK58_22795</a> | <a href="#">no KO assigned   (GenBank) MarR family transcriptional regulator</a>                                     | Transcription                       | 20.839   | 17.335   | 24.077   | 190.100 | 67.602   | 232.122 |
| <a href="#">AMK58_22800</a> | <a href="#">no KO assigned   (GenBank) hypothetical protein</a>                                                      | Hypothetical                        | 46.382   | 34.188   | 55.269   | 194.058 | 127.630  | 168.405 |
| <a href="#">AMK58_22805</a> | <a href="#">no KO assigned   (GenBank) hypothetical protein</a>                                                      | Hypothetical                        | 89.635   | 70.604   | 103.141  | 267.622 | 86.092   | 105.653 |
| <a href="#">AMK58_22810</a> | <a href="#">no KO assigned   (GenBank) hypothetical protein</a>                                                      | Hypothetical                        | 56.585   | 68.329   | 82.439   | 200.286 | 42.739   | 147.861 |
| <a href="#">AMK58_22815</a> | <a href="#">no KO assigned   (GenBank) hypothetical protein</a>                                                      | Hypothetical                        | 966.013  | 1057.832 | 1004.645 | 146.223 | 82.262   | 131.033 |
| <a href="#">AMK58_22820</a> | <a href="#">K06140 regulator of nucleoside diphosphate kinase   (GenBank) hypothetical protein</a>                   | Transcription                       | 1455.670 | 2114.849 | 2062.181 | 153.932 | 67.873   | 266.819 |
| <a href="#">AMK58_22825</a> | <a href="#">K00262 glutamate dehydrogenase (NADP+) [EC:1.4.1.4]   (GenBank) glutamate dehydrogenase</a>              | Metabolism: Amino Acid              | 330.169  | 250.304  | 251.891  | 178.791 | 71.827   | 184.087 |
| <a href="#">AMK58_22830</a> | <a href="#">no KO assigned   (GenBank) hypothetical protein</a>                                                      | Hypothetical                        | 49.142   | 49.762   | 51.188   | 215.842 | 42.556   | 207.197 |
| <a href="#">AMK58_22835</a> | <a href="#">no KO assigned   (GenBank) LuxR family transcriptional regulator</a>                                     | Transcription                       | 196.964  | 252.655  | 219.038  | 144.596 | 50.140   | 130.713 |
| <a href="#">AMK58_22840</a> | <a href="#">K03832 periplasmic protein TonB   (GenBank) hypothetical protein</a>                                     | Transport                           | 289.234  | 289.855  | 284.804  | 168.321 | 34.747   | 91.037  |
| <a href="#">AMK58_22845</a> | <a href="#">K03559 biopolymer transport protein ExbD   (GenBank) biopolymer transporter</a>                          | Transport: Biopolymer               | 442.510  | 497.628  | 416.388  | 213.947 | 44.721   | 78.562  |
| <a href="#">AMK58_22850</a> | <a href="#">K03561 biopolymer transport protein ExbB   (GenBank) hypothetical protein</a>                            | Transport: Biopolymer               | 716.716  | 755.143  | 743.523  | 142.890 | 88.978   | 114.315 |
| <a href="#">AMK58_22855</a> | <a href="#">no KO assigned   (GenBank) hypothetical protein</a>                                                      | Hypothetical                        | 85.819   | 182.917  | 132.762  | 287.088 | 110.543  | 144.961 |
| <a href="#">AMK58_22860</a> | <a href="#">no KO assigned   (GenBank) hypothetical protein</a>                                                      | Hypothetical                        | 108.555  | 117.919  | 121.141  | 162.975 | 151.822  | 157.341 |
| <a href="#">AMK58_22865</a> | <a href="#">no KO assigned   (GenBank) hypothetical protein</a>                                                      | Hypothetical                        | 6.105    | 12.157   | 9.351    | 149.465 | 71.287   | 172.021 |
| <a href="#">AMK58_22870</a> | <a href="#">no KO assigned   (GenBank) hypothetical protein</a>                                                      | Hypothetical                        | 4.817    | 9.156    | 7.911    | 156.809 | 54.306   | 148.407 |
| <a href="#">AMK58_22875</a> | <a href="#">K03642 rare lipoprotein A   (GenBank) hypothetical protein</a>                                           | No COG                              | 18.978   | 31.575   | 26.496   | 184.068 | 92.619   | 261.294 |
| <a href="#">AMK58_22880</a> | <a href="#">no KO assigned   (GenBank) hypothetical protein</a>                                                      | Hypothetical                        | 19.887   | 43.681   | 32.812   | 222.516 | 60.157   | 181.421 |
| <a href="#">AMK58_22885</a> | <a href="#">K02478 two-component system, LysT family, sensor kinase [EC:2.7.13.3]   (GenBank) histidine kinase</a>   | Signal Transduction                 | 10.550   | 12.690   | 8.011    | 142.837 | 42.738   | 156.324 |
| <a href="#">AMK58_22890</a> | <a href="#">K02477 two-component system, LysT family, response regulator   (GenBank) two-component system resp</a>   | Signal Transduction                 | 5.381    | 8.037    | 9.273    | 151.373 | 19.091   | 168.716 |
| <a href="#">AMK58_22895</a> | <a href="#">K06200 carbon starvation protein   (GenBank) carbon starvation protein CstA</a>                          | Starvation                          | 3.942    | 3.194    | 6.353    | 133.365 | 64.366   | 214.812 |
| <a href="#">AMK58_22900</a> | <a href="#">no KO assigned   (GenBank) MES transporter</a>                                                           | Transport: MFS                      | 8.303    | 12.114   | 10.649   | 142.915 | 85.628   | 127.400 |
| <a href="#">AMK58_22905</a> | <a href="#">no KO assigned   (GenBank) peptidase M42</a>                                                             | peptidase                           | 9.490    | 8.723    | 18.443   | 155.900 | 289.535  | 178.316 |
| <a href="#">AMK58_22910</a> | <a href="#">no KO assigned   (GenBank) GNAT family acetyltransferase</a>                                             | Acetyltransferase                   | 5.702    | 7.079    | 14.011   | 211.784 | 158.817  | 171.597 |
| <a href="#">AMK58_22915</a> | <a href="#">K01953 asparagine synthase (glutamine-hydrolysing) [EC:6.3.5.4]   (GenBank) asparagine synthase</a>      | Metabolism: Amino Acid              | 9.885    | 12.626   | 22.298   | 225.106 | 233.412  | 211.517 |
| <a href="#">AMK58_22920</a> | <a href="#">K00375 GntR family transcriptional regulator / MocR family aminotransferase   (GenBank) transcriptio</a> | Transcription                       | 3.692    | 6.517    | 5.425    | 227.712 | 205.790  | 103.556 |
| <a href="#">AMK58_22925</a> | <a href="#">no KO assigned   (GenBank) flavin-nucleotide-binding protein</a>                                         | No COG                              | 13.508   | 9.964    | 13.002   | 218.705 | 744.389  | 164.693 |
| <a href="#">AMK58_22930</a> | <a href="#">no KO assigned   (GenBank) hypothetical protein</a>                                                      | Hypothetical                        | 88.219   | 119.014  | 93.473   | 240.853 | 2868.135 | 251.887 |
| <a href="#">AMK58_22935</a> | <a href="#">no KO assigned   (GenBank) hypothetical protein</a>                                                      | Hypothetical                        | 257.473  | 312.036  | 311.293  | 338.827 | 1392.469 | 246.353 |
| <a href="#">AMK58_22940</a> | <a href="#">no KO assigned   (GenBank) LysR family transcriptional regulator</a>                                     | Transcription                       | 5.896    | 10.960   | 5.980    | 155.867 | 26.217   | 111.055 |
| <a href="#">AMK58_22945</a> | <a href="#">K00822 beta-alanine-pyruvate transaminase [EC:2.6.1.18]   (GenBank) omega amino acid-pyruvate amin</a>   | Metabolism                          | 107.296  | 115.248  | 156.028  | 276.026 | 64.349   | 203.602 |
| <a href="#">AMK58_22950</a> | <a href="#">K00140 malonate-semialdehyde dehydrogenase (acetylating) / methylmalonate-semialdehyde dehydrogenase</a> | Metabolism                          | 113.245  | 140.331  | 164.543  | 132.127 | 56.070   | 158.151 |
| <a href="#">AMK58_22955</a> | <a href="#">no KO assigned   (GenBank) GntR family transcriptional regulator</a>                                     | Transcription                       | 59.022   | 60.994   | 84.481   | 180.776 | 42.316   | 272.908 |
| <a href="#">AMK58_22960</a> | <a href="#">no KO assigned   (GenBank) hypothetical protein</a>                                                      | Hypothetical                        | 30.665   | 43.170   | 43.400   | 219.789 | 45.761   | 175.023 |
| <a href="#">AMK58_22965</a> | <a href="#">no KO assigned   (GenBank) hypothetical protein</a>                                                      | Hypothetical                        | 12.812   | 22.964   | 24.364   | 127.003 | 20.882   | 163.355 |
| <a href="#">AMK58_22970</a> | <a href="#">no KO assigned   (GenBank) hypothetical protein</a>                                                      | Hypothetical                        | 47.228   | 56.432   | 71.357   | 93.401  | 27.026   | 178.039 |
| <a href="#">AMK58_22975</a> | <a href="#">no KO assigned   (GenBank) tricarboxylate transporter</a>                                                | transport                           | 77.941   | 71.530   | 108.334  | 151.140 | 73.884   | 191.822 |
| <a href="#">AMK58_22980</a> | <a href="#">no KO assigned   (GenBank) hypothetical protein</a>                                                      | Hypothetical                        | 299.702  | 275.360  | 356.029  | 142.033 | 58.786   | 267.720 |
| <a href="#">AMK58_22985</a> | <a href="#">no KO assigned   (GenBank) tricarboxylate transporter</a>                                                | transport                           | 530.370  | 493.366  | 629.789  | 144.553 | 75.096   | 280.041 |
| <a href="#">AMK58_22990</a> | <a href="#">no KO assigned   (GenBank) hypothetical protein</a>                                                      | Hypothetical                        | 11.673   | 11.482   | 17.055   | 145.405 | 40.564   | 218.203 |
| <a href="#">AMK58_22995</a> | <a href="#">no KO assigned   (GenBank) pseudogene</a>                                                                | Pseudogene                          | 6.684    | 10.751   | 13.198   | 50.963  | 13.291   | 173.053 |
| <a href="#">AMK58_23000</a> | <a href="#">no KO assigned   (GenBank) hypothetical protein</a>                                                      | Hypothetical                        | 1.727    | 7.506    | 5.226    | 198.998 | 6.531    | 114.454 |
| <a href="#">AMK58_23005</a> | <a href="#">no KO assigned   (GenBank) hypothetical protein</a>                                                      | Hypothetical                        | 13.758   | 11.569   | 12.306   | 139.114 | 16.840   | 290.124 |
| <a href="#">AMK58_23010</a> | <a href="#">no KO assigned   (GenBank) hypothetical protein</a>                                                      | Hypothetical                        | 1.268    | 3.156    | 6.429    | 278.801 | 13.063   | 179.181 |
| <a href="#">AMK58_23015</a> | <a href="#">no KO assigned   (GenBank) glycosyl transferase</a>                                                      | Glycosyl Transferase                | 3.225    | 4.954    | 4.205    | 177.861 | 15.225   | 194.977 |
| <a href="#">AMK58_23020</a> | <a href="#">no KO assigned   (GenBank) hypothetical protein</a>                                                      | Hypothetical                        | 2.407    | 2.675    | 3.938    | 186.105 | 8.746    | 99.501  |
| <a href="#">AMK58_23025</a> | <a href="#">no KO assigned   (GenBank) glycosyl transferase</a>                                                      | Glycosyl Transferase                | 1.395    | 1.667    | 3.802    | 192.082 | 10.975   | 207.380 |
| <a href="#">AMK58_23030</a> | <a href="#">no KO assigned   (GenBank) methyltransferase</a>                                                         | methyltransferase                   | 1.170    | 0.874    | 3.059    | 190.588 | 10.848   | 120.948 |
| <a href="#">AMK58_23035</a> | <a href="#">no KO assigned   (GenBank) glycosyl transferase family 2</a>                                             | Glycosyl Transferase                | 0.669    | 1.230    | 2.447    | 195.147 | 8.506    | 82.532  |
| <a href="#">AMK58_23040</a> | <a href="#">no KO assigned   (GenBank) hemolysin expression modulating protein</a>                                   | No COG                              | 8.985    | 3.520    | 6.302    | 113.254 | 24.338   | 219.213 |
| <a href="#">AMK58_23045</a> | <a href="#">no KO assigned   (GenBank) hypothetical protein</a>                                                      | Hypothetical                        | 5.605    | 3.349    | 9.060    | 93.858  | 97.659   | 278.075 |
| <a href="#">AMK58_23050</a> | <a href="#">no KO assigned   (GenBank) type I secretion membrane fusion protein</a>                                  | Secretion System                    | 4.053    | 4.212    | 5.781    | 133.030 | 24.465   | 158.518 |
| <a href="#">AMK58_23055</a> | <a href="#">no KO assigned   (GenBank) ABC transporter ATP-binding protein</a>                                       | Membrane Transport                  | 4.148    | 7.141    | 9.359    | 196.375 | 57.456   | 143.499 |
| <a href="#">AMK58_23060</a> | <a href="#">K01784 UDP-glucose 4-epimerase [EC:5.1.3.2]   (GenBank) UDP-glucose 4-epimerase</a>                      | Metabolism: Carbohydrate            | 17.805   | 15.602   | 18.735   | 231.194 | 49.501   | 143.529 |
| <a href="#">AMK58_23065</a> | <a href="#">no KO assigned   (GenBank) transcriptional regulator</a>                                                 | Transcription                       | 7.891    | 6.735    | 9.432    | 191.784 | 42.830   | 148.438 |
| <a href="#">AMK58_23070</a> | <a href="#">no KO assigned   (GenBank) hypothetical protein</a>                                                      | Hypothetical                        | 11.091   | 13.498   | 18.357   | 168.101 | 60.370   | 110.841 |
| <a href="#">AMK58_23075</a> | <a href="#">no KO assigned   (GenBank) TetR family transcriptional regulator</a>                                     | Transcription                       | 222.931  | 241.119  | 222.320  | 173.628 | 324.031  | 240.380 |
| <a href="#">AMK58_23080</a> | <a href="#">K18661 malonyl-CoA/methylmalonyl-CoA synthetase [EC:6.2.1.-]   (GenBank) malonyl-CoA synthase</a>        | Metabolism: Amino Acid              | 335.651  | 298.637  | 312.183  | 174.360 | 72.116   | 207.470 |
| <a href="#">AMK58_23085</a> | <a href="#">no KO assigned   (GenBank) AsnC family transcriptional regulator</a>                                     | Transcription                       | 111.333  | 134.070  | 122.066  | 233.492 | 69.611   | 260.833 |
| <a href="#">AMK58_23090</a> | <a href="#">no KO assigned   (GenBank) acyl-CoA dehydrogenase</a>                                                    | dehydrogenase                       | 495.345  | 563.456  | 513.592  | 260.351 | 103.622  | 184.063 |
| <a href="#">AMK58_23095</a> | <a href="#">K00020 3-hydroxyisobutyrate dehydrogenase [EC:1.1.1.31]   (GenBank) 3-hydroxyisobutyrate dehydrog</a>    | Metabolism: Amino Acid              | 299.086  | 408.359  | 352.851  | 88.465  | 73.622   | 97.023  |
| <a href="#">AMK58_23100</a> | <a href="#">K07214 enterochelin esterase and related enzymes   (GenBank) hypothetical protein</a>                    | Enzyme                              | 315.358  | 331.700  | 310.828  | 191.296 | 102.171  | 210.280 |
| <a href="#">AMK58_23105</a> | <a href="#">no KO assigned   (GenBank) hypothetical protein</a>                                                      | Hypothetical                        | 139.941  | 165.505  | 123.776  | 203.690 | 29.247   | 97.085  |
| <a href="#">AMK58_23110</a> | <a href="#">no KO assigned   (GenBank) protein mbtH</a>                                                              | Biosynthesis: secondary metabolites | 119.320  | 146.768  | 105.109  | 364.331 | 40.762   | 45.559  |



|                             |                                                                                                                      |                                       |          |          |          |         |         |         |
|-----------------------------|----------------------------------------------------------------------------------------------------------------------|---------------------------------------|----------|----------|----------|---------|---------|---------|
| <a href="#">AMK58_23115</a> | <a href="#">K00216 2,3-dihydro-2,3-dihydroxybenzoate dehydrogenase [EC:1.3.1.281] (GenBank) 2,3-dihydro-2,3-di</a>   | Metabolism: terpenoids and polyketide | 83.239   | 123.385  | 99.830   | 180.136 | 28.176  | 91.804  |
| <a href="#">AMK58_23120</a> | <a href="#">K01252 bifunctional isochorismate lyase / aryl carrier protein [EC:3.3.2.1.6.3.2.14] (GenBank) iso</a>   | Metabolism: terpenoids and polyketide | 376.769  | 414.526  | 347.591  | 152.373 | 53.132  | 130.212 |
| <a href="#">AMK58_23125</a> | <a href="#">K02363 2,3-dihydroxybenzoate-AMP ligase [EC:6.3.2.14.2.7.7.58] (GenBank) entE; 2,3-dihydroxybenz</a>     | Biosynthesis: secondary metabolites   | 171.855  | 186.801  | 133.884  | 198.722 | 49.103  | 88.692  |
| <a href="#">AMK58_23130</a> | <a href="#">K02361 isochorismate synthase [EC:5.4.4.21] (GenBank) hypothetical protein</a>                           | Metabolism: Co-Factors and Vitamins   | 289.535  | 360.478  | 272.715  | 201.186 | 48.186  | 124.279 |
| <a href="#">AMK58_23135</a> | <a href="#">no KO assigned (GenBank) hypothetical protein</a>                                                        | Hypothetical                          | 107.930  | 98.285   | 82.666   | 180.052 | 12.184  | 161.098 |
| <a href="#">AMK58_23140</a> | <a href="#">no KO assigned (GenBank) hypothetical protein</a>                                                        | Hypothetical                          | 102.628  | 90.837   | 85.356   | 168.775 | 8.671   | 48.723  |
| <a href="#">AMK58_23145</a> | <a href="#">K08225 MFS transporter, ENTS family, enterobactin (siderophore) exporter (GenBank) POT family tran</a>   | Transport: MFS                        | 245.409  | 222.791  | 198.063  | 213.936 | 7.651   | 89.780  |
| <a href="#">AMK58_23150</a> | <a href="#">K16089 outer membrane receptor for ferrienterochelin and colicins (GenBank) hypothetical protein</a>     | Transport                             | 1792.385 | 1371.855 | 1184.893 | 138.992 | 45.647  | 188.692 |
| <a href="#">AMK58_23155</a> | <a href="#">no KO assigned (GenBank) peptidase</a>                                                                   | peptidase                             | 253.989  | 245.567  | 198.662  | 223.529 | 20.673  | 126.217 |
| <a href="#">AMK58_23160</a> | <a href="#">no KO assigned (GenBank) hypothetical protein</a>                                                        | Hypothetical                          | 310.682  | 263.866  | 254.492  | 176.466 | 20.542  | 154.989 |
| <a href="#">AMK58_23165</a> | <a href="#">no KO assigned (GenBank) hypothetical protein</a>                                                        | Hypothetical                          | 216.926  | 193.397  | 193.064  | 92.919  | 13.231  | 204.658 |
| <a href="#">AMK58_23170</a> | <a href="#">K03413 two-component system, chemotaxis family, response regulator CheY I (GenBank) hypothetical pro</a> | Chemotaxis                            | 75.528   | 74.058   | 70.716   | 96.539  | 100.774 | 271.586 |
| <a href="#">AMK58_23175</a> | <a href="#">no KO assigned (GenBank) hypothetical protein</a>                                                        | Hypothetical                          | 33.610   | 40.716   | 38.310   | 165.125 | 23.803  | 143.867 |
| <a href="#">AMK58_23180</a> | <a href="#">K12368 dipeptide transport system substrate-binding protein (GenBank) peptide ABC transporter subs</a>   | chemotaxis                            | 184.826  | 173.695  | 150.507  | 76.888  | 28.731  | 225.510 |
| <a href="#">AMK58_23185</a> | <a href="#">no KO assigned (GenBank) acetyl-CoA synthetase</a>                                                       | enzyme                                | 27.952   | 25.725   | 38.165   | 186.724 | 26.989  | 129.865 |
| <a href="#">AMK58_23190</a> | <a href="#">K01995 branched-chain amino acid transport system ATP-binding protein (GenBank) ABC transporter A</a>    | Transport: Amino Acid                 | 869.878  | 771.759  | 900.125  | 117.369 | 119.735 | 226.487 |
| <a href="#">AMK58_23195</a> | <a href="#">K01897 long-chain acyl-CoA synthetase [EC:6.2.1.31] (GenBank) AMP-dependent synthetase</a>               | Metabolism: Lipid                     | 525.785  | 453.782  | 565.942  | 139.016 | 80.726  | 259.696 |
| <a href="#">AMK58_23200</a> | <a href="#">K01997 branched-chain amino acid transport system permease protein (GenBank) ABC transporter perme</a>   | Transport: Amino Acid                 | 604.283  | 500.158  | 679.176  | 62.829  | 106.055 | 210.506 |
| <a href="#">AMK58_23205</a> | <a href="#">K01998 branched-chain amino acid transport system permease protein (GenBank) ABC transporter perme</a>   | Transport: Amino Acid                 | 567.947  | 447.214  | 598.104  | 71.428  | 69.060  | 192.761 |
| <a href="#">AMK58_23210</a> | <a href="#">K01999 branched-chain amino acid transport system substrate-binding protein (GenBank) branched-cha</a>   | Transport: Amino Acid                 | 1080.904 | 919.405  | 1307.819 | 194.017 | 77.162  | 176.274 |
| <a href="#">AMK58_23215</a> | <a href="#">K01996 branched-chain amino acid transport system ATP-binding protein (GenBank) ABC transporter A</a>    | Transport: Amino Acid                 | 284.898  | 289.006  | 353.780  | 161.621 | 56.745  | 178.510 |
| <a href="#">AMK58_23220</a> | <a href="#">K01912 phenylacetate-CoA ligase [EC:6.2.1.30] (GenBank) AMP-dependent synthetase</a>                     | Metabolism: Amino Acid                | 125.898  | 127.616  | 167.624  | 222.577 | 56.982  | 222.805 |
| <a href="#">AMK58_23225</a> | <a href="#">no KO assigned (GenBank) aldehyde dehydrogenase</a>                                                      | dehydrogenase                         | 289.720  | 294.862  | 319.929  | 123.431 | 697.227 | 192.827 |
| <a href="#">AMK58_23230</a> | <a href="#">K00253 isovaleryl-CoA dehydrogenase [EC:1.3.8.41] (GenBank) isovaleryl-CoA dehydrogenase</a>             | Metabolism: Amino Acid                | 413.904  | 407.620  | 366.948  | 137.989 | 535.323 | 201.473 |
| <a href="#">AMK58_23235</a> | <a href="#">K00626 acetyl-CoA C-acetyltransferase [EC:2.3.1.9] (GenBank) acetyl-CoA acetyltransferase</a>            | Metabolism                            | 478.153  | 395.948  | 469.339  | 212.269 | 391.815 | 174.388 |
| <a href="#">AMK58_23240</a> | <a href="#">no KO assigned (GenBank) acyl-CoA dehydrogenase</a>                                                      | dehydrogenase                         | 243.110  | 209.862  | 245.364  | 250.859 | 192.739 | 130.981 |
| <a href="#">AMK58_23245</a> | <a href="#">K01969 3-methylcrotonyl-CoA carboxylase beta subunit [EC:6.4.1.41] (GenBank) methylcrotonyl-CoA c</a>    | Metabolism: Amino Acid                | 423.611  | 321.191  | 377.358  | 130.919 | 253.567 | 212.111 |
| <a href="#">AMK58_23250</a> | <a href="#">K13766 methylglutaconyl-CoA hydratase [EC:4.2.1.181] (GenBank) enoyl-CoA hydratase</a>                   | Metabolism: Amino Acid                | 209.987  | 204.165  | 219.505  | 115.995 | 132.443 | 125.604 |
| <a href="#">AMK58_23255</a> | <a href="#">K01968 3-methylcrotonyl-CoA carboxylase alpha subunit [EC:6.4.1.41] (GenBank) 3-methylcrotonyl-CoA</a>   | Metabolism: Amino Acid                | 98.539   | 89.517   | 111.442  | 129.571 | 50.118  | 83.698  |
| <a href="#">AMK58_23260</a> | <a href="#">K01640 hydroxymethylglutaryl-CoA lyase [EC:4.1.3.41] (GenBank) hydroxymethylglutaryl-CoA lyase</a>       | Metabolism                            | 205.154  | 163.157  | 242.389  | 213.184 | 111.748 | 167.407 |
| <a href="#">AMK58_23265</a> | <a href="#">no KO assigned (GenBank) hypothetical protein</a>                                                        | Hypothetical                          | 172.839  | 168.608  | 187.277  | 207.042 | 85.305  | 133.964 |
| <a href="#">AMK58_23270</a> | <a href="#">K00311 electron-transferring-flavoprotein dehydrogenase [EC:1.5.5.11] (GenBank) electron transfer f</a>  | Energy                                | 213.972  | 170.098  | 207.144  | 114.022 | 88.749  | 178.883 |
| <a href="#">AMK58_23275</a> | <a href="#">no KO assigned (GenBank) 3-hydroxy-2-methylbutyryl-CoA dehydrogenase</a>                                 | dehydrogenase                         | 355.280  | 323.706  | 381.313  | 215.609 | 178.064 | 190.800 |
| <a href="#">AMK58_23280</a> | <a href="#">no KO assigned (GenBank) hypothetical protein</a>                                                        | Hypothetical                          | 122.476  | 112.187  | 148.162  | 247.784 | 402.924 | 324.594 |
| <a href="#">AMK58_23285</a> | <a href="#">K07017 uncharacterized protein (GenBank) hypothetical protein</a>                                        | Hypothetical                          | 69.528   | 59.683   | 62.689   | 96.348  | 55.096  | 235.408 |
| <a href="#">AMK58_23290</a> | <a href="#">no KO assigned (GenBank) methyltransferase</a>                                                           | methyltransferase                     | 79.986   | 106.921  | 88.379   | 42.320  | 332.741 | 220.137 |
| <a href="#">AMK58_23295</a> | <a href="#">no KO assigned (GenBank) hypothetical protein</a>                                                        | Hypothetical                          | 196.936  | 181.292  | 187.729  | 114.899 | 130.408 | 295.822 |
| <a href="#">AMK58_23300</a> | <a href="#">no KO assigned (GenBank) transcriptional regulator</a>                                                   | Transcription                         | 1828.022 | 1910.401 | 1519.668 | 72.429  | 232.929 | 289.070 |
| <a href="#">AMK58_23305</a> | <a href="#">K05350 beta-glucosidase [EC:3.2.1.21] (GenBank) beta-glucosidase</a>                                     | Metabolism: Carbohydrates             | 59.716   | 67.099   | 59.469   | 137.112 | 92.987  | 295.830 |
| <a href="#">AMK58_23310</a> | <a href="#">K05350 beta-glucosidase [EC:3.2.1.21] (GenBank) beta-glucosidase</a>                                     | Metabolism                            | 181.476  | 176.098  | 176.602  | 218.192 | 131.608 | 189.387 |
| <a href="#">AMK58_23315</a> | <a href="#">no KO assigned (GenBank) hypothetical protein</a>                                                        | Hypothetical                          | 22.249   | 25.074   | 29.627   | 168.501 | 68.240  | 150.173 |
| <a href="#">AMK58_23320</a> | <a href="#">K02471 putative ATP-binding cassette transporter (GenBank) ABC transporter</a>                           | Membrane Transport                    | 31.019   | 35.470   | 31.903   | 237.873 | 26.694  | 207.838 |
| <a href="#">AMK58_23325</a> | <a href="#">no KO assigned (GenBank) hypothetical protein</a>                                                        | Hypothetical                          | 4.702    | 7.491    | 8.643    | 187.590 | 25.985  | 121.644 |
| <a href="#">AMK58_23330</a> | <a href="#">no KO assigned (GenBank) hypothetical protein</a>                                                        | Hypothetical                          | 6.565    | 9.208    | 9.661    | 182.220 | 28.489  | 188.916 |
| <a href="#">AMK58_23335</a> | <a href="#">no KO assigned (GenBank) hypothetical protein</a>                                                        | Hypothetical                          | 2.484    | 11.129   | 4.723    | 86.499  | 46.062  | 301.689 |
| <a href="#">AMK58_23340</a> | <a href="#">K03446 MFS transporter, DHA2 family, multidrug resistance protein (GenBank) MFS transporter</a>          | Transport: MFS                        | 2.741    | 2.730    | 4.634    | 171.570 | 49.473  | 215.572 |
| <a href="#">AMK58_23345</a> | <a href="#">K03543 membrane fusion protein, multidrug efflux system (GenBank) multidrug transporter</a>              | Transport                             | 2.176    | 5.199    | 5.896    | 152.714 | 26.901  | 126.795 |
| <a href="#">AMK58_23350</a> | <a href="#">no KO assigned (GenBank) alkylhydroperoxidase</a>                                                        | Defense                               | 7.042    | 4.855    | 8.241    | 150.212 | 31.664  | 230.316 |
| <a href="#">AMK58_23355</a> | <a href="#">no KO assigned (GenBank) NmrA family transcriptional regulator</a>                                       | Transcription                         | 6.592    | 15.370   | 10.243   | 165.847 | 32.352  | 223.645 |
| <a href="#">AMK58_23360</a> | <a href="#">no KO assigned (GenBank) CadC-family transcriptional regulator</a>                                       | Transcription                         | 32.317   | 45.350   | 39.445   | 148.897 | 54.150  | 255.133 |
| <a href="#">AMK58_23365</a> | <a href="#">no KO assigned (GenBank) transposase</a>                                                                 | Genetic Information Processing        | 16.525   | 9.493    | 13.597   | 186.024 | 35.720  | 218.057 |
| <a href="#">AMK58_23370</a> | <a href="#">K14230 tRNA Met (GenBank) tRNA-Met</a>                                                                   | tRNA synthesis/modification           | 69.186   | 122.125  | 56.812   | 98.997  | 259.814 | 298.900 |
| <a href="#">AMK58_23375</a> | <a href="#">K01985 5S ribosomal RNA (GenBank) 5S ribosomal RNA</a>                                                   | Ribosome                              | 0.000    | 0.000    | 0.000    | 0.000   | 0.000   | 0.000   |
| <a href="#">AMK58_23380</a> | <a href="#">K01980 23S ribosomal RNA (GenBank) 23S ribosomal RNA</a>                                                 | Ribosome                              | 0.220    | 0.263    | 0.084    | 0.412   | 0.099   | 1.590   |
| <a href="#">AMK58_23385</a> | <a href="#">K14218 tRNA Ala (GenBank) tRNA-Ala</a>                                                                   | tRNA synthesis/modification           | 36.641   | 19.036   | 43.927   | 21.340  | 23.279  | 193.517 |
| <a href="#">AMK58_23390</a> | <a href="#">K14227 tRNA Ile (GenBank) tRNA-Ile</a>                                                                   | tRNA synthesis/modification           | 17.296   | 9.394    | 10.465   | 10.532  | 15.907  | 94.773  |
| <a href="#">AMK58_23395</a> | <a href="#">K01977 16S ribosomal RNA (GenBank) 16S ribosomal RNA</a>                                                 | Ribosome                              | 0.000    | 0.000    | 0.000    | 0.000   | 0.000   | 0.000   |
| <a href="#">AMK58_23400</a> | <a href="#">no KO assigned (GenBank) peptidase M23</a>                                                               | peptidase                             | 367.999  | 439.180  | 368.226  | 157.962 | 64.705  | 191.460 |
| <a href="#">AMK58_23405</a> | <a href="#">no KO assigned (GenBank) hypothetical protein</a>                                                        | Hypothetical                          | 44.748   | 42.250   | 51.009   | 240.584 | 28.507  | 173.775 |
| <a href="#">AMK58_23410</a> | <a href="#">K02556 chemotaxis protein MotA (GenBank) flagellar motor stator protein MotA</a>                         | Chemotaxis                            | 194.620  | 160.466  | 151.353  | 139.582 | 29.874  | 307.601 |
| <a href="#">AMK58_23415</a> | <a href="#">K01596 phosphoenolpyruvate carboxylase (GTP) [EC:4.1.1.32] (GenBank) phosphoenolpyruvate carb</a>        | Metabolism: Carbohydrate              | 671.288  | 566.708  | 613.463  | 171.078 | 130.721 | 186.378 |
| <a href="#">AMK58_23420</a> | <a href="#">K07226 heme iron utilization protein (GenBank) heme iron utilization protein</a>                         | No COG                                | 115.419  | 179.012  | 157.998  | 213.995 | 121.831 | 87.746  |
| <a href="#">AMK58_23425</a> | <a href="#">K14981 two-component system, OmpR family, response regulator ChvI (GenBank) two-component syste</a>      | Signal transduction                   | 118.291  | 138.227  | 124.381  | 185.022 | 78.801  | 118.722 |
| <a href="#">AMK58_23430</a> | <a href="#">K14980 two-component system, OmpR family, sensor histidine kinase ChvG [EC:2.7.13.31] (GenBank) h</a>    | Signal Transduction                   | 23.485   | 31.271   | 27.699   | 228.149 | 56.357  | 144.456 |
| <a href="#">AMK58_23435</a> | <a href="#">no KO assigned (GenBank) hypothetical protein</a>                                                        | Hypothetical                          | 122.804  | 170.505  | 120.053  | 156.394 | 95.913  | 286.020 |
| <a href="#">AMK58_23440</a> | <a href="#">no KO assigned (GenBank) aldolase</a>                                                                    | enzyme                                | 175.984  | 232.917  | 210.921  | 125.409 | 342.547 | 249.234 |
| <a href="#">AMK58_23445</a> | <a href="#">K06958 RNase adapter protein RapZ (GenBank) nucleotide-binding protein</a>                               | Genetic Information Processing        | 210.440  | 227.027  | 247.431  | 158.851 | 287.357 | 219.679 |

|                             |                                                                                                                      |                          |          |          |          |         |          |         |
|-----------------------------|----------------------------------------------------------------------------------------------------------------------|--------------------------|----------|----------|----------|---------|----------|---------|
| <a href="#">AMK58_23450</a> | <a href="#">K02793 PTS system_mannose-specific IIA component [EC:2.7.1.191] (GenBank) PTS fructose transport</a>     | Metabolism               | 514.116  | 642.383  | 551.540  | 93.600  | 268.462  | 220.909 |
| <a href="#">AMK58_23455</a> | <a href="#">K11189 phosphocarrier protein (GenBank) serine kinase</a>                                                | Signal Transduction      | 268.749  | 309.618  | 255.093  | 47.304  | 169.085  | 124.602 |
| <a href="#">AMK58_23460</a> | <a href="#">K08483 phosphotransferase system_enzyme I, PtsI [EC:2.7.3.9] (GenBank) phosphoenolpyruvate-protein</a>   | Membrane transport       | 72.659   | 82.005   | 76.551   | 200.240 | 96.332   | 140.701 |
| <a href="#">AMK58_23465</a> | <a href="#">no KO assigned (GenBank) hypothetical protein</a>                                                        | Hypothetical             | 23.601   | 21.151   | 23.001   | 260.193 | 72.424   | 245.877 |
| <a href="#">AMK58_23470</a> | <a href="#">no KO assigned (GenBank) hypothetical protein</a>                                                        | Hypothetical             | 3.908    | 4.061    | 7.432    | 198.037 | 29.320   | 133.857 |
| <a href="#">AMK58_23475</a> | <a href="#">K02035 peptide/nickel transport system substrate-binding protein (GenBank) hypothetical protein</a>      | Quorum sensing           | 58.322   | 59.678   | 63.342   | 144.381 | 63.293   | 268.387 |
| <a href="#">AMK58_23480</a> | <a href="#">K02033 peptide/nickel transport system permease protein (GenBank) ABC transporter</a>                    | Quorum sensing           | 21.128   | 24.187   | 28.268   | 152.695 | 50.484   | 165.061 |
| <a href="#">AMK58_23485</a> | <a href="#">K02034 peptide/nickel transport system permease protein (GenBank) peptide ABC transporter permease</a>   | Quorum sensing           | 6.869    | 9.234    | 12.083   | 153.674 | 24.516   | 178.676 |
| <a href="#">AMK58_23490</a> | <a href="#">K02031 peptide/nickel transport system ATP-binding protein K02032 peptide/nickel transport system AT</a> | Quorum sensing           | 9.235    | 13.963   | 14.959   | 173.945 | 21.401   | 104.447 |
| <a href="#">AMK58_23495</a> | <a href="#">no KO assigned (GenBank) enamine deaminase RidA</a>                                                      | enzyme                   | 16.887   | 25.651   | 16.329   | 165.253 | 24.452   | 303.367 |
| <a href="#">AMK58_23500</a> | <a href="#">K01480 agmatinase [EC:3.5.3.11] (GenBank) arginase</a>                                                   | Metabolism: Amino Acid   | 20.557   | 16.577   | 18.827   | 133.803 | 29.912   | 190.625 |
| <a href="#">AMK58_23505</a> | <a href="#">K01438 acetylmorphine deacetylase [EC:3.5.1.16] (GenBank) acetylmorphine deacetylase</a>                 | Metabolism: Amino Acid   | 10.537   | 10.702   | 15.830   | 169.667 | 36.363   | 137.870 |
| <a href="#">AMK58_23510</a> | <a href="#">K15634 probable phosphoglycerate mutase [EC:5.4.2.12] (GenBank) hypothetical protein</a>                 | Metabolism               | 6.101    | 5.607    | 10.486   | 139.555 | 15.825   | 69.189  |
| <a href="#">AMK58_23515</a> | <a href="#">K01091 phosphoglycerate phosphatase [EC:3.1.3.18] (GenBank) phosphoglycerate phosphatase</a>             | Metabolism: Carbohydrate | 27.200   | 30.651   | 33.170   | 210.750 | 39.982   | 65.173  |
| <a href="#">AMK58_23520</a> | <a href="#">K02010 iron(III) transport system ATP-binding protein [EC:3.6.3.30] (GenBank) ABC transporter ATP-</a>   | Transport: Metal         | 16.409   | 16.560   | 21.295   | 188.920 | 23.056   | 109.802 |
| <a href="#">AMK58_23525</a> | <a href="#">K02011 iron(III) transport system permease protein (GenBank) ABC transporter permease</a>                | Transport: Metal         | 28.343   | 19.847   | 27.889   | 194.472 | 20.895   | 218.182 |
| <a href="#">AMK58_23530</a> | <a href="#">no KO assigned (GenBank) ABC transporter substrate-binding protein</a>                                   | Membrane Transport       | 99.952   | 91.292   | 136.485  | 109.328 | 34.857   | 185.032 |
| <a href="#">AMK58_23535</a> | <a href="#">no KO assigned (GenBank) aspartate-alanine antiporter</a>                                                | Transport: Amino Acid    | 2.796    | 4.283    | 5.248    | 216.536 | 62.044   | 185.521 |
| <a href="#">AMK58_23540</a> | <a href="#">K09758 aspartate 4-decarboxylase [EC:4.1.1.12] (GenBank) aspartate 4-decarboxylase</a>                   | Metabolism: Amino Acid   | 3.932    | 5.319    | 7.830    | 161.291 | 46.615   | 238.160 |
| <a href="#">AMK58_23545</a> | <a href="#">K10126 two-component system_NtrC family_C4-dicarboxylate transport response regulator DctD (GenB</a>     | Signal transduction      | 17.559   | 17.223   | 17.559   | 135.879 | 28.049   | 72.675  |
| <a href="#">AMK58_23550</a> | <a href="#">K08475 two-component system_NtrC family_phosphoglycerate transport system sensor histidine kinase</a>    | Signal Transduction      | 14.288   | 16.174   | 19.115   | 182.468 | 30.600   | 70.662  |
| <a href="#">AMK58_23555</a> | <a href="#">no KO assigned (GenBank) hypothetical protein</a>                                                        | Hypothetical             | 49.404   | 67.555   | 61.198   | 157.059 | 101.679  | 162.597 |
| <a href="#">AMK58_23560</a> | <a href="#">no KO assigned (GenBank) hypothetical protein</a>                                                        | Hypothetical             | 136.046  | 180.839  | 164.014  | 62.782  | 92.558   | 264.377 |
| <a href="#">AMK58_23565</a> | <a href="#">K05350 beta-glucosidase [EC:3.2.1.21] (GenBank) beta-glucosidase</a>                                     | Metabolism: Carbohydrate | 200.522  | 197.771  | 178.327  | 164.737 | 136.501  | 211.588 |
| <a href="#">AMK58_23570</a> | <a href="#">K07406 alpha-galactosidase [EC:3.2.1.22] (GenBank) alpha-glucosidase/alpha-galactosidase</a>             | Metabolism               | 439.737  | 467.167  | 438.980  | 136.406 | 262.420  | 267.680 |
| <a href="#">AMK58_23575</a> | <a href="#">no KO assigned (GenBank) hypothetical protein</a>                                                        | Hypothetical             | 808.345  | 1108.299 | 902.326  | 298.131 | 535.884  | 215.129 |
| <a href="#">AMK58_23580</a> | <a href="#">no KO assigned (GenBank) hypothetical protein</a>                                                        | Hypothetical             | 128.729  | 151.738  | 110.819  | 172.439 | 130.618  | 135.175 |
| <a href="#">AMK58_23585</a> | <a href="#">K01438 acetylmorphine deacetylase [EC:3.5.1.16] (GenBank) acetylmorphine deacetylase</a>                 | Biosynthesis: Amino Acid | 137.454  | 184.197  | 185.351  | 203.055 | 142.110  | 277.547 |
| <a href="#">AMK58_23590</a> | <a href="#">K03410 chemotaxis protein CheC (GenBank) chemotaxis protein CheX</a>                                     | Chemotaxis               | 361.904  | 392.099  | 371.716  | 77.556  | 175.734  | 200.931 |
| <a href="#">AMK58_23595</a> | <a href="#">no KO assigned (GenBank) histidine kinase</a>                                                            | Signal Transduction      | 196.632  | 209.516  | 207.512  | 118.971 | 134.038  | 177.124 |
| <a href="#">AMK58_23600</a> | <a href="#">no KO assigned (GenBank) regulator</a>                                                                   | Signal transduction      | 142.013  | 146.847  | 175.131  | 112.189 | 99.597   | 192.462 |
| <a href="#">AMK58_23605</a> | <a href="#">no KO assigned (GenBank) hypothetical protein</a>                                                        | Hypothetical             | 69.618   | 105.489  | 82.502   | 124.343 | 72.583   | 150.628 |
| <a href="#">AMK58_23610</a> | <a href="#">K03407 two-component system_chemotaxis family_sensor kinase CheA [EC:2.7.13.31] (GenBank) histidi</a>    | Chemotaxis               | 23.533   | 30.056   | 27.584   | 221.864 | 68.361   | 100.711 |
| <a href="#">AMK58_23615</a> | <a href="#">K03413 two-component system_chemotaxis family_response regulator CheY (GenBank) two-component</a>        | Chemotaxis               | 41.572   | 38.071   | 36.353   | 73.167  | 97.551   | 157.290 |
| <a href="#">AMK58_23620</a> | <a href="#">K00575 chemotaxis protein methyltransferase CheR [EC:2.1.1.80] (GenBank) chemotaxis protein</a>          | Chemotaxis               | 38.530   | 35.286   | 31.420   | 97.575  | 144.313  | 200.156 |
| <a href="#">AMK58_23625</a> | <a href="#">no KO assigned (GenBank) hypothetical protein</a>                                                        | Hypothetical             | 37.224   | 30.432   | 41.167   | 150.901 | 133.891  | 124.986 |
| <a href="#">AMK58_23630</a> | <a href="#">K03412 two-component system_chemotaxis family_response regulator CheB [EC:3.1.1.61] (GenBank) tv</a>     | Chemotaxis               | 44.595   | 54.618   | 49.503   | 219.533 | 232.211  | 145.454 |
| <a href="#">AMK58_23635</a> | <a href="#">K03408 purine-binding chemotaxis protein CheW (GenBank) hypothetical protein</a>                         | Chemotaxis               | 73.822   | 92.560   | 99.284   | 280.168 | 213.065  | 153.500 |
| <a href="#">AMK58_23640</a> | <a href="#">K03406 methyl-accepting chemotaxis protein (GenBank) chemotaxis protein</a>                              | Chemotaxis               | 110.202  | 120.376  | 123.529  | 200.778 | 192.436  | 126.966 |
| <a href="#">AMK58_23645</a> | <a href="#">K03410 chemotaxis protein CheC (GenBank) hypothetical protein</a>                                        | Chemotaxis               | 205.581  | 242.251  | 232.220  | 355.083 | 312.652  | 200.820 |
| <a href="#">AMK58_23650</a> | <a href="#">no KO assigned (GenBank) regulator</a>                                                                   | Signal transduction      | 461.558  | 493.719  | 432.762  | 192.220 | 331.592  | 253.349 |
| <a href="#">AMK58_23655</a> | <a href="#">K05595 multiple antibiotic resistance protein (GenBank) antibiotic resistance protein</a>                | Transport                | 25.784   | 32.372   | 33.932   | 207.988 | 123.702  | 182.092 |
| <a href="#">AMK58_23660</a> | <a href="#">no KO assigned (GenBank) aldose epimerase</a>                                                            | Enzyme                   | 302.547  | 360.003  | 414.908  | 247.033 | 227.295  | 158.529 |
| <a href="#">AMK58_23665</a> | <a href="#">K01647 citrate synthase [EC:2.3.3.1] (GenBank) gltA; type II citrate synthase</a>                        | Metabolism: Carbon       | 2645.768 | 2601.059 | 2598.117 | 115.260 | 716.900  | 243.879 |
| <a href="#">AMK58_23670</a> | <a href="#">no KO assigned (GenBank) flavodoxin</a>                                                                  | No COG                   | 46.309   | 55.643   | 66.907   | 495.568 | 204.721  | 273.477 |
| <a href="#">AMK58_23675</a> | <a href="#">no KO assigned (GenBank) ATPase</a>                                                                      | No COG                   | 17.475   | 22.372   | 21.956   | 269.752 | 120.192  | 198.112 |
| <a href="#">AMK58_23680</a> | <a href="#">K00059 3-oxoacyl-[acyl-carrier protein] reductase [EC:1.1.1.100] (GenBank) oxidoreductase</a>            | Metabolism               | 45.520   | 49.532   | 42.835   | 192.150 | 95.652   | 66.724  |
| <a href="#">AMK58_23685</a> | <a href="#">K00864 glycerol kinase [EC:2.7.1.30] (GenBank) glycerol kinase</a>                                       | Lipid metabolism         | 155.725  | 149.859  | 138.663  | 202.140 | 178.837  | 165.721 |
| <a href="#">AMK58_23690</a> | <a href="#">K17321 glycerol transport system substrate-binding protein (GenBank) ABC transporter substrate-bin</a>   | Membrane transport       | 970.185  | 919.548  | 776.249  | 159.136 | 522.427  | 280.386 |
| <a href="#">AMK58_23695</a> | <a href="#">no KO assigned (GenBank) hypothetical protein</a>                                                        | Hypothetical             | 100.484  | 103.337  | 72.047   | 265.897 | 254.596  | 237.905 |
| <a href="#">AMK58_23700</a> | <a href="#">K17323 glycerol transport system permease protein (GenBank) sugar ABC transporter permease</a>           | Transport                | 145.350  | 102.430  | 103.722  | 96.336  | 300.155  | 177.127 |
| <a href="#">AMK58_23705</a> | <a href="#">K17322 glycerol transport system permease protein (GenBank) ABC transporter permease</a>                 | Transport: phospholipid  | 223.407  | 187.173  | 165.329  | 99.694  | 321.241  | 200.690 |
| <a href="#">AMK58_23710</a> | <a href="#">K17325 glycerol transport system ATP-binding protein (GenBank) ABC transporter ATP-binding protein</a>   | Transport: Lipid         | 124.966  | 128.862  | 109.833  | 182.143 | 374.038  | 103.713 |
| <a href="#">AMK58_23715</a> | <a href="#">K17324 glycerol transport system ATP-binding protein (GenBank) ABC transporter ATP-binding protein</a>   | Transport                | 183.806  | 188.046  | 189.988  | 294.990 | 840.474  | 215.895 |
| <a href="#">AMK58_23720</a> | <a href="#">K00111 glycerol-3-phosphate dehydrogenase [EC:1.1.5.3] (GenBank) glycerol-3-phosphate dehydrogenase</a>  | Metabolism: Lipid        | 189.071  | 174.037  | 170.289  | 201.628 | 1138.788 | 174.156 |
| <a href="#">AMK58_23725</a> | <a href="#">no KO assigned (GenBank) alkaline phosphatase</a>                                                        | enzyme                   | 3.396    | 2.387    | 6.079    | 165.130 | 421.080  | 148.211 |
| <a href="#">AMK58_23730</a> | <a href="#">no KO assigned (GenBank) hypothetical protein</a>                                                        | Hypothetical             | 7.122    | 17.729   | 14.108   | 112.894 | 332.228  | 323.050 |
| <a href="#">AMK58_23735</a> | <a href="#">no KO assigned (GenBank) hypothetical protein</a>                                                        | Hypothetical             | 1.971    | 3.619    | 4.763    | 200.417 | 27.541   | 88.596  |
| <a href="#">AMK58_23740</a> | <a href="#">no KO assigned (GenBank) hypothetical protein</a>                                                        | Hypothetical             | 7.143    | 9.958    | 13.131   | 209.550 | 32.652   | 60.937  |
| <a href="#">AMK58_23745</a> | <a href="#">K06160 putative ATP-binding cassette transporter (GenBank) peptide ABC transporter</a>                   | Membrane Transport       | 3.816    | 4.384    | 5.233    | 163.660 | 19.548   | 166.227 |
| <a href="#">AMK58_23750</a> | <a href="#">K06160 putative ATP-binding cassette transporter (GenBank) cyclic peptide transporter</a>                | Membrane transport       | 3.296    | 4.376    | 4.875    | 176.805 | 10.456   | 148.063 |
| <a href="#">AMK58_23755</a> | <a href="#">no KO assigned (GenBank) hypothetical protein</a>                                                        | Hypothetical             | 4.575    | 3.905    | 5.904    | 187.356 | 4.959    | 114.997 |
| <a href="#">AMK58_23760</a> | <a href="#">no KO assigned (GenBank) hypothetical protein</a>                                                        | Hypothetical             | 29.943   | 35.557   | 33.422   | 248.386 | 17.560   | 147.623 |
| <a href="#">AMK58_23765</a> | <a href="#">no KO assigned (GenBank) hypothetical protein</a>                                                        | Hypothetical             | 10.395   | 10.960   | 5.233    | 175.292 | 62.548   | 233.612 |
| <a href="#">AMK58_23770</a> | <a href="#">no KO assigned (GenBank) hypothetical protein</a>                                                        | Hypothetical             | 8.354    | 7.778    | 7.943    | 154.774 | 33.048   | 195.466 |
| <a href="#">AMK58_23775</a> | <a href="#">no KO assigned (GenBank) hypothetical protein</a>                                                        | Hypothetical             | 13.170   | 18.129   | 20.831   | 165.682 | 29.129   | 189.480 |
| <a href="#">AMK58_23780</a> | <a href="#">K03406 methyl-accepting chemotaxis protein (GenBank) hypothetical protein</a>                            | Chemotaxis               | 21.059   | 29.007   | 30.583   | 213.321 | 27.355   | 206.419 |

|             |                                                                                                                       |                              |         |         |         |         |          |         |
|-------------|-----------------------------------------------------------------------------------------------------------------------|------------------------------|---------|---------|---------|---------|----------|---------|
| AMK58_23785 | <a href="#">K08738 cytochrome c   (GenBank) cytochrome C</a>                                                          | Energy                       | 50.448  | 66.113  | 51.680  | 297.341 | 106.826  | 317.494 |
| AMK58_23790 | <a href="#">no KO assigned   (GenBank) hypothetical protein</a>                                                       | Hypothetical                 | 86.749  | 124.909 | 103.251 | 199.388 | 24.553   | 249.810 |
| AMK58_23795 | <a href="#">no KO assigned   (GenBank) hypothetical protein</a>                                                       | Hypothetical                 | 374.914 | 487.226 | 513.139 | 341.895 | 148.295  | 288.804 |
| AMK58_23800 | <a href="#">no KO assigned   (GenBank) hypothetical protein</a>                                                       | Hypothetical                 | 28.059  | 36.226  | 38.490  | 124.139 | 62.417   | 172.252 |
| AMK58_23805 | <a href="#">no KO assigned   (GenBank) histidine kinase</a>                                                           | Signal Transduction          | 18.807  | 26.520  | 31.820  | 203.808 | 87.381   | 210.187 |
| AMK58_23810 | <a href="#">no KO assigned   (GenBank) hypothetical protein</a>                                                       | Hypothetical                 | 34.356  | 38.332  | 51.164  | 267.815 | 121.204  | 130.501 |
| AMK58_23815 | <a href="#">no KO assigned   (GenBank) hypothetical protein</a>                                                       | Hypothetical                 | 43.556  | 51.863  | 54.012  | 176.058 | 132.156  | 71.881  |
| AMK58_23820 | <a href="#">K06975 uncharacterized protein   (GenBank) acetyltransferase</a>                                          | Acetyltransferase            | 116.183 | 129.084 | 94.963  | 343.485 | 298.764  | 162.545 |
| AMK58_23825 | <a href="#">K01187 alpha-glucosidase [EC:3.2.1.20]   (GenBank) alpha-amylase</a>                                      | Metabolism: Carbohydrate     | 2.750   | 3.996   | 6.714   | 160.892 | 166.336  | 123.435 |
| AMK58_23830 | <a href="#">no KO assigned   (GenBank) 3-ketoacyl-ACP reductase</a>                                                   | No COG                       | 17.252  | 22.087  | 20.944  | 191.280 | 278.766  | 200.257 |
| AMK58_23835 | <a href="#">no KO assigned   (GenBank) multidrug DMT transporter permease</a>                                         | No COG                       | 68.021  | 67.066  | 71.155  | 278.544 | 113.111  | 117.474 |
| AMK58_23840 | <a href="#">no KO assigned   (GenBank) hypothetical protein</a>                                                       | Hypothetical                 | 22.495  | 11.858  | 22.646  | 117.873 | 653.694  | 446.011 |
| AMK58_23845 | <a href="#">K06938 uncharacterized protein   (GenBank) hypothetical protein</a>                                       | Hypothetical                 | 14.268  | 19.484  | 22.094  | 198.227 | 237.819  | 223.027 |
| AMK58_23850 | <a href="#">no KO assigned   (GenBank) hypothetical protein</a>                                                       | Hypothetical                 | 16.845  | 16.773  | 25.360  | 312.619 | 50.493   | 86.887  |
| AMK58_23855 | <a href="#">K03406 methyl-accepting chemotaxis protein   (GenBank) hypothetical protein</a>                           | Chemotaxis                   | 29.964  | 29.979  | 28.013  | 161.706 | 52.939   | 159.531 |
| AMK58_23860 | <a href="#">no KO assigned   (GenBank) hypothetical protein</a>                                                       | Hypothetical                 | 130.735 | 97.473  | 147.573 | 201.295 | 285.217  | 150.887 |
| AMK58_23865 | <a href="#">no KO assigned   (GenBank) hypothetical protein</a>                                                       | Hypothetical                 | 17.053  | 16.980  | 22.429  | 295.056 | 139.607  | 85.388  |
| AMK58_23870 | <a href="#">no KO assigned   (GenBank) hypothetical protein</a>                                                       | Hypothetical                 | 15.049  | 8.174   | 22.764  | 351.861 | 232.589  | 194.728 |
| AMK58_23875 | <a href="#">no KO assigned   (GenBank) hypothetical protein</a>                                                       | Hypothetical                 | 51.939  | 69.191  | 61.397  | 242.339 | 304.533  | 141.069 |
| AMK58_23880 | <a href="#">no KO assigned   (GenBank) hypothetical protein</a>                                                       | Hypothetical                 | 337.147 | 600.942 | 442.175 | 270.310 | 1229.724 | 256.781 |
| AMK58_23885 | <a href="#">no KO assigned   (GenBank) hypothetical protein</a>                                                       | Hypothetical                 | 3.830   | 5.280   | 8.123   | 198.688 | 27.484   | 57.091  |
| AMK58_23890 | <a href="#">no KO assigned   (GenBank) methyltransferase</a>                                                          | methyltransferase            | 24.460  | 24.355  | 27.714  | 169.558 | 0.000    | 0.000   |
| AMK58_23895 | <a href="#">K05939 acyl-lacyl-carrier-protein-phospholipid O-acyltransferase / long-chain-fatty-acid-lacyl-car</a>    | Metabolism: Lipid            | 12.814  | 12.088  | 22.848  | 148.017 | 0.000    | 0.000   |
| AMK58_23900 | <a href="#">no KO assigned   (GenBank) hypothetical protein</a>                                                       | Hypothetical                 | 16.851  | 2.486   | 20.175  | 74.405  | 0.000    | 0.000   |
| AMK58_23905 | <a href="#">K01451 hippurate hydrolase [EC:3.5.1.32]   (GenBank) peptidase M20</a>                                    | Metabolism: Amino Acid       | 245.453 | 249.135 | 221.503 | 154.858 | 0.000    | 0.096   |
| AMK58_23910 | <a href="#">no KO assigned   (GenBank) oxidoreductase</a>                                                             | Oxidoreductase               | 68.429  | 77.926  | 79.712  | 232.834 | 0.000    | 0.088   |
| AMK58_23915 | <a href="#">no KO assigned   (GenBank) hypothetical protein</a>                                                       | Hypothetical                 | 108.802 | 111.394 | 130.827 | 232.688 | 0.531    | 0.000   |
| AMK58_23920 | <a href="#">K01999 branched-chain amino acid transport system substrate-binding protein   (GenBank) amino acid A</a>  | Transport: Amino Acid        | 417.942 | 355.504 | 330.463 | 154.317 | 0.122    | 0.101   |
| AMK58_23925 | <a href="#">K01997 branched-chain amino acid transport system permease protein   (GenBank) branched-chain amino</a>   | Transport: Amino Acid        | 310.295 | 243.490 | 243.322 | 90.399  | 0.000    | 0.000   |
| AMK58_23930 | <a href="#">K01998 branched-chain amino acid transport system permease protein   (GenBank) branched-chain amino</a>   | Transport: Amino Acid        | 138.388 | 100.585 | 111.827 | 143.152 | 0.000    | 0.000   |
| AMK58_23935 | <a href="#">K01995 branched-chain amino acid transport system ATP-binding protein   (GenBank) ABC transporter A</a>   | Transport: Amino Acid        | 89.545  | 64.047  | 65.504  | 139.801 | 0.000    | 0.000   |
| AMK58_23940 | <a href="#">K01996 branched-chain amino acid transport system ATP-binding protein   (GenBank) livF: ABC transpor</a>  | Transport: Amino Acid        | 65.647  | 67.265  | 65.712  | 207.895 | 0.000    | 0.000   |
| AMK58_23945 | <a href="#">no KO assigned   (GenBank) 2-amino-thiazoline-4-carboxylic acid hydrolase</a>                             | Hydrolase                    | 74.951  | 61.715  | 55.275  | 254.220 | 0.000    | 0.223   |
| AMK58_23950 | <a href="#">no KO assigned   (GenBank) hypothetical protein</a>                                                       | Hypothetical                 | 286.617 | 289.025 | 350.776 | 211.454 | 0.000    | 0.246   |
| AMK58_23955 | <a href="#">K19784 chromate reductase   (GenBank) NADPH-dependent FMN reductase</a>                                   | Energy                       | 74.161  | 67.317  | 73.045  | 312.023 | 0.000    | 0.000   |
| AMK58_23960 | <a href="#">K03303 lactate permease   (GenBank) lactate permease</a>                                                  | Transport: Carbohydrate      | 11.058  | 10.609  | 15.119  | 170.944 | 0.000    | 0.075   |
| AMK58_23965 | <a href="#">K02444 DeoR family transcriptional regulator, glycerol-3-phosphate regulon repressor   (GenBank) Deo</a>  | Transcription                | 29.434  | 38.978  | 39.527  | 220.109 | 0.000    | 0.000   |
| AMK58_23970 | <a href="#">K10111 multiple sugar transport system ATP-binding protein [EC:3.6.3.-1]   (GenBank) hypothetical pro</a> | Transport: Sugar             | 2.136   | 2.015   | 5.131   | 215.947 | 0.000    | 0.000   |
| AMK58_23975 | <a href="#">K10238 trehalose/maltose transport system permease protein   (GenBank) sugar ABC transporter permea</a>   | Transport: Carbohydrate      | 3.082   | 5.261   | 4.605   | 192.264 | 0.000    | 0.000   |
| AMK58_23980 | <a href="#">K10237 trehalose/maltose transport system permease protein   (GenBank) ABC transporter permease</a>       | Transport: Carbohydrate      | 2.626   | 2.477   | 5.388   | 148.485 | 0.000    | 0.000   |
| AMK58_23985 | <a href="#">K10236 trehalose/maltose transport system substrate-binding protein   (GenBank) ABC transporter subs</a>  | Transport: Carbohydrate      | 6.282   | 6.824   | 9.412   | 185.392 | 0.000    | 0.000   |
| AMK58_23990 | <a href="#">K00570 phosphatidylethanolamine/phosphatidyl-N-methylethanolamine N-methyltransferase [EC:2.1.1.17</a>    | Metabolism: Lipid            | 83.762  | 78.477  | 77.832  | 184.882 | 0.000    | 0.177   |
| AMK58_23995 | <a href="#">K03496 chromosome partitioning protein   (GenBank) hypothetical protein</a>                               | Cell Cycle/Shape/Homeostasis | 30.800  | 22.561  | 28.948  | 247.705 | 0.000    | 0.000   |
| AMK58_24000 | <a href="#">K03497 chromosome partitioning protein, ParB family   (GenBank) hypothetical protein</a>                  | Cell Cycle/Shape/Homeostasis | 20.744  | 32.037  | 26.566  | 185.247 | 0.000    | 0.131   |
| AMK58_24005 | <a href="#">no KO assigned   (GenBank) hypothetical protein</a>                                                       | Hypothetical                 | 87.657  | 93.683  | 76.746  | 248.960 | 0.000    | 0.000   |
| AMK58_24010 | <a href="#">no KO assigned   (GenBank) hypothetical protein</a>                                                       | Hypothetical                 | 32.258  | 31.413  | 28.645  | 183.887 | 0.000    | 0.000   |
| AMK58_24015 | <a href="#">no KO assigned   (GenBank) hypothetical protein</a>                                                       | Hypothetical                 | 4.532   | 6.447   | 9.850   | 183.001 | 0.000    | 0.000   |
| AMK58_24020 | <a href="#">K00023 acetoacetyl-CoA reductase [EC:1.1.1.36]   (GenBank) 3-ketoacyl-ACP reductase</a>                   | Metabolism: Carbon           | 70.096  | 57.595  | 56.239  | 154.306 | 0.000    | 0.000   |
| AMK58_24025 | <a href="#">no KO assigned   (GenBank) acetyltransferase</a>                                                          | Acetyltransferase            | 11.634  | 15.377  | 41.310  | 171.840 | 0.000    | 0.000   |
| AMK58_24030 | <a href="#">no KO assigned   (GenBank) hypothetical protein</a>                                                       | Hypothetical                 | 6.861   | 3.617   | 22.064  | 136.236 | 0.000    | 0.094   |
| AMK58_24035 | <a href="#">K00820 glucosamine-fructose-6-phosphate aminotransferase (isomerizing) [EC:2.6.1.16]   (GenBank) ir</a>   | Metabolism: Carbohydrates    | 32.101  | 28.490  | 37.931  | 153.617 | 0.000    | 0.108   |
| AMK58_24040 | <a href="#">no KO assigned   (GenBank) hypothetical protein</a>                                                       | Hypothetical                 | 2.387   | 0.648   | 5.983   | 95.626  | 0.000    | 0.101   |
| AMK58_24045 | <a href="#">no KO assigned   (GenBank) glucosidase</a>                                                                | Metabolism: Carbohydrates    | 2.892   | 3.403   | 4.916   | 120.627 | 0.000    | 0.041   |
| AMK58_24050 | <a href="#">K21134 multidrug efflux pump   (GenBank) ACR family transporter</a>                                       | Transport                    | 3.525   | 3.471   | 5.377   | 136.089 | 0.000    | 0.108   |
| AMK58_24055 | <a href="#">K21137 membrane fusion protein, multidrug efflux system   (GenBank) hypothetical protein</a>              | Membrane Transport           | 0.667   | 3.321   | 4.123   | 229.205 | 0.000    | 0.000   |
| AMK58_24060 | <a href="#">K21136 membrane fusion protein, multidrug efflux system   (GenBank) hypothetical protein</a>              | Membrane Transport           | 5.016   | 8.174   | 8.889   | 265.270 | 0.000    | 0.000   |
| AMK58_24065 | <a href="#">K00925 acetate kinase [EC:2.7.2.1]   (GenBank) acetate kinase</a>                                         | Metabolism: Carbon           | 2.344   | 4.871   | 5.911   | 199.865 | 0.000    | 0.095   |
| AMK58_24070 | <a href="#">K00625 phosphate acetyltransferase [EC:2.3.1.8]   (GenBank) phosphate acetyltransferase</a>               | Metabolism: Carbon           | 1.892   | 5.274   | 5.516   | 134.648 | 0.000    | 0.117   |
| AMK58_24075 | <a href="#">no KO assigned   (GenBank) hypothetical protein</a>                                                       | Hypothetical                 | 4.315   | 6.066   | 5.068   | 74.803  | 0.000    | 0.000   |
| AMK58_24080 | <a href="#">no KO assigned   (GenBank) hypothetical protein</a>                                                       | Hypothetical                 | 2.480   | 3.152   | 5.367   | 177.804 | 0.000    | 0.049   |
| AMK58_24085 | <a href="#">no KO assigned   (GenBank) hypothetical protein</a>                                                       | Hypothetical                 | 7.228   | 3.599   | 13.746  | 208.179 | 0.000    | 0.000   |
| AMK58_24090 | <a href="#">no KO assigned   (GenBank) hypothetical protein</a>                                                       | Hypothetical                 | 5.300   | 17.049  | 10.853  | 194.951 | 0.000    | 0.000   |
| AMK58_24095 | <a href="#">no KO assigned   (GenBank) hypothetical protein</a>                                                       | Hypothetical                 | 38.869  | 43.597  | 47.294  | 195.900 | 0.000    | 0.138   |
| AMK58_24100 | <a href="#">no KO assigned   (GenBank) hypothetical protein</a>                                                       | Hypothetical                 | 8.870   | 13.248  | 16.867  | 218.327 | 0.000    | 0.000   |
| AMK58_24105 | <a href="#">no KO assigned   (GenBank) hypothetical protein</a>                                                       | Hypothetical                 | 7.031   | 6.721   | 14.440  | 154.839 | 0.000    | 0.000   |
| AMK58_24110 | <a href="#">no KO assigned   (GenBank) hypothetical protein</a>                                                       | Hypothetical                 | 23.090  | 20.866  | 26.566  | 194.675 | 0.000    | 0.000   |
| AMK58_24115 | <a href="#">no KO assigned   (GenBank) hypothetical protein</a>                                                       | Hypothetical                 | 5.820   | 7.559   | 8.060   | 138.036 | 0.000    | 0.117   |

|                             |                                                                                                                       |                                     |         |         |         |         |         |         |
|-----------------------------|-----------------------------------------------------------------------------------------------------------------------|-------------------------------------|---------|---------|---------|---------|---------|---------|
| <a href="#">AMK58_24120</a> | <a href="#">no KO assigned   (GenBank) hypothetical protein</a>                                                       | Hypothetical                        | 2.275   | 1.510   | 4.967   | 173.811 | 0.000   | 0.000   |
| <a href="#">AMK58_24125</a> | <a href="#">no KO assigned   (GenBank) polyphosphate kinase</a>                                                       | Signal Transduction                 | 6.411   | 11.316  | 11.360  | 90.949  | 0.000   | 0.135   |
| <a href="#">AMK58_24130</a> | <a href="#">no KO assigned   (GenBank) hypothetical protein</a>                                                       | Hypothetical                        | 3.363   | 8.611   | 3.655   | 108.768 | 0.000   | 0.000   |
| <a href="#">AMK58_24135</a> | <a href="#">no KO assigned   (GenBank) hypothetical protein</a>                                                       | Hypothetical                        | 12.604  | 11.790  | 18.884  | 159.457 | 0.000   | 0.000   |
| <a href="#">AMK58_24140</a> | <a href="#">no KO assigned   (GenBank) hypothetical protein</a>                                                       | Hypothetical                        | 6.529   | 10.638  | 9.875   | 79.105  | 0.000   | 0.275   |
| <a href="#">AMK58_24145</a> | <a href="#">K07444 putative N6-adenine-specific DNA methylase [EC:2.1.1.-]   (GenBank) RNA methyltransferase</a>      | DNA Repair and Replication          | 21.024  | 18.936  | 24.310  | 194.736 | 0.000   | 0.098   |
| <a href="#">AMK58_24150</a> | <a href="#">no KO assigned   (GenBank) dehydrogenase</a>                                                              | Dehydrogenase                       | 26.809  | 28.245  | 31.356  | 232.930 | 0.000   | 0.053   |
| <a href="#">AMK58_24155</a> | <a href="#">no KO assigned   (GenBank) hypothetical protein</a>                                                       | Hypothetical                        | 6.400   | 8.498   | 9.128   | 123.366 | 0.000   | 0.000   |
| <a href="#">AMK58_24160</a> | <a href="#">no KO assigned   (GenBank) hypothetical protein</a>                                                       | Hypothetical                        | 35.237  | 41.614  | 35.743  | 127.745 | 0.000   | 0.000   |
| <a href="#">AMK58_24165</a> | <a href="#">no KO assigned   (GenBank) hypothetical protein</a>                                                       | Hypothetical                        | 54.547  | 56.512  | 57.859  | 247.925 | 0.177   | 0.146   |
| <a href="#">AMK58_24170</a> | <a href="#">no KO assigned   (GenBank) esterase</a>                                                                   | esterase                            | 54.009  | 62.053  | 56.995  | 148.869 | 0.000   | 0.138   |
| <a href="#">AMK58_24175</a> | <a href="#">K18118 succinyl-CoA:acetate CoA-transferase [EC:2.8.3.18]   (GenBank) acetyl-CoA hydrolase</a>            | Metabolism: Carbon                  | 113.538 | 120.075 | 97.474  | 183.246 | 0.000   | 0.000   |
| <a href="#">AMK58_24180</a> | <a href="#">K12252 arginine:pyruvate transaminase [EC:2.6.1.84]   (GenBank) aspartate aminotransferase</a>            | Metabolism: Amino Acid              | 27.112  | 35.240  | 27.156  | 135.432 | 0.000   | 0.000   |
| <a href="#">AMK58_24185</a> | <a href="#">K07799 membrane fusion protein, multidrug efflux system   (GenBank) multidrug transporter</a>             | Membrane Transport                  | 20.940  | 18.712  | 22.462  | 180.167 | 0.000   | 0.000   |
| <a href="#">AMK58_24190</a> | <a href="#">K07788 multidrug efflux pump   (GenBank) multidrug transporter</a>                                        | Membrane Transport                  | 18.930  | 13.525  | 16.477  | 179.963 | 0.000   | 0.145   |
| <a href="#">AMK58_24195</a> | <a href="#">K07789 multidrug efflux pump   (GenBank) modulation protein</a>                                           | Membrane Transport                  | 11.128  | 9.751   | 11.357  | 178.385 | 0.000   | 0.069   |
| <a href="#">AMK58_24200</a> | <a href="#">no KO assigned   (GenBank) hypothetical protein</a>                                                       | Hypothetical                        | 5.126   | 8.264   | 10.676  | 258.756 | 0.000   | 0.000   |
| <a href="#">AMK58_24205</a> | <a href="#">no KO assigned   (GenBank) FAD-dependent oxidoreductase</a>                                               | Oxidoreductase                      | 29.509  | 47.100  | 51.920  | 212.179 | 0.000   | 0.067   |
| <a href="#">AMK58_24210</a> | <a href="#">K14986 two-component system, LuxR family, sensor kinase FixL [EC:2.7.13.31]   (GenBank) PAS domain</a>    | Signal Transduction                 | 135.188 | 152.535 | 146.632 | 194.899 | 0.000   | 0.074   |
| <a href="#">AMK58_24215</a> | <a href="#">K14987 two-component system, LuxR family, response regulator FixJ   (GenBank) fixJ, two-component s</a>   | Signal Transduction                 | 72.309  | 85.954  | 90.070  | 110.376 | 0.000   | 0.000   |
| <a href="#">AMK58_24220</a> | <a href="#">no KO assigned   (GenBank) transcriptional regulator</a>                                                  | Transcription                       | 153.361 | 148.529 | 113.584 | 195.488 | 0.363   | 0.000   |
| <a href="#">AMK58_24225</a> | <a href="#">no KO assigned   (GenBank) nitroreductase</a>                                                             | Nitrogen                            | 50.834  | 47.198  | 45.394  | 132.509 | 0.000   | 0.000   |
| <a href="#">AMK58_24230</a> | <a href="#">no KO assigned   (GenBank) hypothetical protein</a>                                                       | Hypothetical                        | 6.089   | 1.692   | 7.271   | 133.922 | 0.000   | 0.000   |
| <a href="#">AMK58_24235</a> | <a href="#">no KO assigned   (GenBank) hypothetical protein</a>                                                       | Hypothetical                        | 52.696  | 36.230  | 37.578  | 141.457 | 0.000   | 0.194   |
| <a href="#">AMK58_24240</a> | <a href="#">no KO assigned   (GenBank) Crp/Fnr family transcriptional regulator</a>                                   | Transcription                       | 31.178  | 42.429  | 37.385  | 180.284 | 0.000   | 0.000   |
| <a href="#">AMK58_24245</a> | <a href="#">K01768 adenylate cyclase [EC:4.6.1.11]   (GenBank) hypothetical protein</a>                               | cyclic nucleotide                   | 25.055  | 25.090  | 23.619  | 231.599 | 0.000   | 0.264   |
| <a href="#">AMK58_24250</a> | <a href="#">no KO assigned   (GenBank) hypothetical protein</a>                                                       | Hypothetical                        | 49.430  | 34.287  | 35.557  | 216.000 | 0.000   | 0.343   |
| <a href="#">AMK58_24255</a> | <a href="#">K07667 two-component system, OmpR family, KDP operon response regulator KdpE   (GenBank) two-co</a>       | Signal Transduction                 | 5.543   | 3.105   | 8.235   | 205.575 | 0.000   | 0.161   |
| <a href="#">AMK58_24260</a> | <a href="#">K07646 two-component system, OmpR family, sensor histidine kinase KdpD [EC:2.7.13.31]   (GenBank) h</a>   | Signal Transduction                 | 5.012   | 5.034   | 6.536   | 259.260 | 0.050   | 0.000   |
| <a href="#">AMK58_24265</a> | <a href="#">K01548 K+-transporting ATPase ATPase C chain [EC:3.6.3.121]   (GenBank) potassium-transporting ATP</a>    | Transport: Ion                      | 0.596   | 1.188   | 5.860   | 250.336 | 0.000   | 0.000   |
| <a href="#">AMK58_24270</a> | <a href="#">K01547 K+-transporting ATPase ATPase B chain [EC:3.6.3.121]   (GenBank) potassium-transporting ATP</a>    | Transport: Ion                      | 1.819   | 3.396   | 3.621   | 184.496 | 0.000   | 0.000   |
| <a href="#">AMK58_24275</a> | <a href="#">K01546 K+-transporting ATPase ATPase A chain [EC:3.6.3.121]   (GenBank) potassium-transporting ATP</a>    | Transport: Ion                      | 1.558   | 1.692   | 5.116   | 265.188 | 0.000   | 0.066   |
| <a href="#">AMK58_24280</a> | <a href="#">no KO assigned   (GenBank) potassium transporter TrkH</a>                                                 | Transport: Ion                      | 0.000   | 8.037   | 3.837   | 191.019 | 0.000   | 0.000   |
| <a href="#">AMK58_24285</a> | <a href="#">K11475 GntR family transcriptional regulator, vanillate catabolism transcriptional regulator   (GenB</a>  | Transcription                       | 7.663   | 5.087   | 8.905   | 114.055 | 0.000   | 0.158   |
| <a href="#">AMK58_24290</a> | <a href="#">K07120 uncharacterized protein   (GenBank) hypothetical protein</a>                                       | Hypothetical                        | 1.258   | 0.000   | 5.000   | 210.581 | 0.000   | 0.000   |
| <a href="#">AMK58_24295</a> | <a href="#">K13995 maleamate amidohydrolase [EC:3.5.1.107]   (GenBank) isochorismatase</a>                            | Metabolism: Co-Factors and Vitamins | 6.109   | 11.060  | 12.498  | 193.185 | 0.000   | 0.000   |
| <a href="#">AMK58_24300</a> | <a href="#">no KO assigned   (GenBank) dipeptide/oligopeptide/nickel ABC transporter ATP-binding protein</a>          | Membrane Transport                  | 2.456   | 1.914   | 5.177   | 161.328 | 0.000   | 0.099   |
| <a href="#">AMK58_24305</a> | <a href="#">no KO assigned   (GenBank) methionine ABC transporter ATP-binding protein</a>                             | Membrane Transport                  | 0.915   | 2.049   | 1.957   | 88.214  | 0.000   | 0.000   |
| <a href="#">AMK58_24310</a> | <a href="#">K02034 peptide/nickel transport system permease protein   (GenBank) peptide ABC transporter permease</a>  | Transport: Metal                    | 1.909   | 0.000   | 3.760   | 210.038 | 0.000   | 0.000   |
| <a href="#">AMK58_24315</a> | <a href="#">K02033 peptide/nickel transport system permease protein   (GenBank) peptide ABC transporter permease</a>  | Transport: Metal                    | 4.771   | 4.622   | 9.685   | 173.067 | 196.096 | 186.040 |
| <a href="#">AMK58_24320</a> | <a href="#">K02035 peptide/nickel transport system substrate-binding protein   (GenBank) ABC transporter substra</a>  | Transport: Metal                    | 4.280   | 8.220   | 6.832   | 104.438 | 118.824 | 190.589 |
| <a href="#">AMK58_24325</a> | <a href="#">K13995 maleamate amidohydrolase [EC:3.5.1.107]   (GenBank) N-carbamoylsarcosine amidase</a>               | Metabolism: Co-Factors and Vitamins | 1.153   | 3.445   | 5.299   | 224.743 | 170.008 | 265.883 |
| <a href="#">AMK58_24330</a> | <a href="#">K02433 aspartyl-tRNA(Asn)/glutamyl-tRNA(Gln) amidotransferase subunit A [EC:6.3.5.6.3.5.71]   (Gen</a>    | tRNA synthesis/modification         | 0.519   | 1.549   | 2.383   | 242.989 | 71.301  | 120.363 |
| <a href="#">AMK58_24335</a> | <a href="#">no KO assigned   (GenBank) amidase</a>                                                                    | Enzyme                              | 0.660   | 1.690   | 2.600   | 237.847 | 44.092  | 100.640 |
| <a href="#">AMK58_24340</a> | <a href="#">no KO assigned   (GenBank) alanine acetyltransferase</a>                                                  | Acetyltransferase                   | 58.703  | 39.456  | 55.583  | 290.296 | 283.459 | 255.839 |
| <a href="#">AMK58_24345</a> | <a href="#">K01992 ABC-2 type transport system permease protein   (GenBank) sugar ABC transporter permease</a>        | Membrane Transport                  | 279.330 | 238.271 | 218.605 | 56.190  | 238.431 | 161.038 |
| <a href="#">AMK58_24350</a> | <a href="#">K01990 ABC-2 type transport system ATP-binding protein   (GenBank) multidrug ABC transporter ATP-</a>     | Membrane Transport                  | 158.037 | 181.034 | 147.779 | 170.759 | 156.940 | 235.682 |
| <a href="#">AMK58_24355</a> | <a href="#">K06950 uncharacterized protein   (GenBank) hydrolase</a>                                                  | hydrolase                           | 311.360 | 377.541 | 332.398 | 239.248 | 748.513 | 209.931 |
| <a href="#">AMK58_24360</a> | <a href="#">no KO assigned   (GenBank) hypothetical protein</a>                                                       | Hypothetical                        | 20.022  | 25.579  | 26.161  | 202.163 | 237.650 | 177.717 |
| <a href="#">AMK58_24365</a> | <a href="#">no KO assigned   (GenBank) hypothetical protein</a>                                                       | Hypothetical                        | 33.528  | 40.805  | 74.385  | 252.012 | 170.291 | 371.929 |
| <a href="#">AMK58_24370</a> | <a href="#">no KO assigned   (GenBank) hypothetical protein</a>                                                       | Hypothetical                        | 50.100  | 83.144  | 59.544  | 137.685 | 231.515 | 246.846 |
| <a href="#">AMK58_24375</a> | <a href="#">K09781 uncharacterized protein   (GenBank) ABC transporter</a>                                            | Membrane Transport                  | 22.098  | 18.761  | 25.766  | 103.917 | 135.962 | 110.544 |
| <a href="#">AMK58_24380</a> | <a href="#">no KO assigned   (GenBank) C4-dicarboxylate ABC transporter</a>                                           | Membrane Transport                  | 61.295  | 55.469  | 69.630  | 135.282 | 103.082 | 148.814 |
| <a href="#">AMK58_24385</a> | <a href="#">no KO assigned   (GenBank) C4-dicarboxylate ABC transporter permease</a>                                  | Membrane Transport                  | 55.755  | 37.631  | 55.896  | 109.061 | 72.111  | 225.621 |
| <a href="#">AMK58_24390</a> | <a href="#">no KO assigned   (GenBank) C4-dicarboxylate ABC transporter</a>                                           | Membrane Transport                  | 140.639 | 152.904 | 140.389 | 283.496 | 112.858 | 243.365 |
| <a href="#">AMK58_24395</a> | <a href="#">no KO assigned   (GenBank) GntR family transcriptional regulator</a>                                      | Transcription                       | 18.161  | 24.112  | 24.463  | 346.222 | 85.058  | 258.376 |
| <a href="#">AMK58_24400</a> | <a href="#">no KO assigned   (GenBank) LysR family transcriptional regulator</a>                                      | Transcription                       | 97.159  | 103.916 | 105.170 | 102.481 | 136.246 | 261.081 |
| <a href="#">AMK58_24405</a> | <a href="#">no KO assigned   (GenBank) hypothetical protein</a>                                                       | Hypothetical                        | 413.761 | 496.107 | 514.639 | 180.366 | 97.754  | 362.641 |
| <a href="#">AMK58_24410</a> | <a href="#">no KO assigned   (GenBank) ArsR family transcriptional regulator</a>                                      | Transcription                       | 11.531  | 10.483  | 15.016  | 181.997 | 38.038  | 348.199 |
| <a href="#">AMK58_24415</a> | <a href="#">K00163 pyruvate dehydrogenase E1 component [EC:1.2.4.11]   (GenBank) transketolase</a>                    | Metabolism: Carbon                  | 20.908  | 21.319  | 23.033  | 137.747 | 175.865 | 169.500 |
| <a href="#">AMK58_24420</a> | <a href="#">no KO assigned   (GenBank) hypothetical protein</a>                                                       | Hypothetical                        | 43.721  | 47.915  | 44.031  | 140.353 | 120.972 | 171.523 |
| <a href="#">AMK58_24425</a> | <a href="#">no KO assigned   (GenBank) hypothetical protein</a>                                                       | Hypothetical                        | 9.313   | 9.274   | 11.217  | 91.905  | 219.145 | 313.779 |
| <a href="#">AMK58_24430</a> | <a href="#">no KO assigned   (GenBank) protease</a>                                                                   | protease                            | 63.213  | 68.606  | 72.082  | 275.387 | 356.524 | 228.778 |
| <a href="#">AMK58_24435</a> | <a href="#">K09004 uncharacterized protein   (GenBank) hypothetical protein</a>                                       | Hypothetical                        | 28.303  | 23.486  | 30.399  | 211.684 | 332.279 | 120.775 |
| <a href="#">AMK58_24440</a> | <a href="#">K00826 branched-chain amino acid aminotransferase [EC:2.6.1.421]   (GenBank) 2-ke-to-4-methylthiobuty</a> | Metabolism                          | 15.041  | 12.456  | 18.125  | 186.125 | 111.319 | 60.485  |
| <a href="#">AMK58_24445</a> | <a href="#">K01665 para-aminobenzoate synthetase component I [EC:2.6.1.851]   (GenBank) aminobenzoate synthetase</a>  | Metabolism: Co-Factors and Vitamins | 16.446  | 25.493  | 21.722  | 136.584 | 80.637  | 57.536  |
| <a href="#">AMK58_24450</a> | <a href="#">K00046 gluconate 5-dehydrogenase [EC:1.1.1.69]   (GenBank) gluconate 5-dehydrogenase</a>                  | Oxidoreductases                     | 58.997  | 53.377  | 60.928  | 173.328 | 125.185 | 97.272  |

|                             |                                                                                                                       |                              |          |          |          |         |          |         |
|-----------------------------|-----------------------------------------------------------------------------------------------------------------------|------------------------------|----------|----------|----------|---------|----------|---------|
| <a href="#">AMK58_24455</a> | <a href="#">no KO assigned   (GenBank) hypothetical protein.</a>                                                      | Hypothetical                 | 15.160   | 25.703   | 25.322   | 156.972 | 55.497   | 75.986  |
| <a href="#">AMK58_24460</a> | <a href="#">K03672 thioredoxin 2 [EC:1.8.1.8]   (GenBank) thioredoxin.</a>                                            | Chaperone                    | 24.215   | 46.616   | 50.652   | 331.580 | 105.850  | 126.241 |
| <a href="#">AMK58_24465</a> | <a href="#">no KO assigned   (GenBank) two-component system response regulator.</a>                                   | Signal Transduction          | 22.949   | 41.368   | 44.016   | 294.426 | 113.633  | 113.921 |
| <a href="#">AMK58_24470</a> | <a href="#">K13040 two-component system, LuxR family, sensor histidine kinase TrsR [EC:2.7.13.3]   (GenBank) hyp.</a> | Signal Transduction          | 192.398  | 241.950  | 365.337  | 193.411 | 58.739   | 86.202  |
| <a href="#">AMK58_24475</a> | <a href="#">K17218 sulfide:quinone oxidoreductase [EC:1.8.5.4]   (GenBank) pyridine nucleotide-disulfide oxidore.</a> | Metabolism                   | 1653.101 | 2186.253 | 2778.221 | 174.575 | 74.557   | 177.674 |
| <a href="#">AMK58_24480</a> | <a href="#">no KO assigned   (GenBank) sulfurtransferase.</a>                                                         | Transferase                  | 3705.245 | 4474.876 | 6006.500 | 275.080 | 75.385   | 337.359 |
| <a href="#">AMK58_24485</a> | <a href="#">no KO assigned   (GenBank) RND transporter.</a>                                                           | Transport                    | 215.320  | 308.248  | 422.866  | 138.841 | 21.136   | 81.863  |
| <a href="#">AMK58_24490</a> | <a href="#">no KO assigned   (GenBank) multidrug transporter AcrB.</a>                                                | Transport                    | 410.910  | 572.240  | 815.346  | 218.091 | 45.615   | 143.036 |
| <a href="#">AMK58_24495</a> | <a href="#">no KO assigned   (GenBank) sulfurtransferase.</a>                                                         | Transferase                  | 127.119  | 241.119  | 308.797  | 277.121 | 33.220   | 109.028 |
| <a href="#">AMK58_24500</a> | <a href="#">no KO assigned   (GenBank) ArsR family transcriptional regulator.</a>                                     | Transcription                | 100.033  | 208.145  | 276.154  | 305.889 | 46.915   | 182.638 |
| <a href="#">AMK58_24505</a> | <a href="#">no KO assigned   (GenBank) hypothetical protein.</a>                                                      | Hypothetical                 | 9.113    | 11.667   | 26.923   | 271.618 | 118.533  | 192.549 |
| <a href="#">AMK58_24510</a> | <a href="#">K03088 RNA polymerase sigma-70 factor, ECF subfamily   (GenBank) RNA polymerase.</a>                      | Transcription                | 542.854  | 641.124  | 704.909  | 266.247 | 7182.784 | 226.054 |
| <a href="#">AMK58_24515</a> | <a href="#">no KO assigned   (GenBank) hypothetical protein.</a>                                                      | Hypothetical                 | 433.740  | 517.566  | 568.426  | 183.771 | 5038.772 | 157.918 |
| <a href="#">AMK58_24520</a> | <a href="#">no KO assigned   (GenBank) hypothetical protein.</a>                                                      | Hypothetical                 | 287.192  | 333.691  | 335.421  | 201.767 | 4888.824 | 286.354 |
| <a href="#">AMK58_24525</a> | <a href="#">no KO assigned   (GenBank) hypothetical protein.</a>                                                      | Hypothetical                 | 114.068  | 147.350  | 151.893  | 158.807 | 1961.695 | 123.705 |
| <a href="#">AMK58_24530</a> | <a href="#">no KO assigned   (GenBank) hypothetical protein.</a>                                                      | Hypothetical                 | 50.646   | 70.917   | 60.193   | 237.979 | 719.159  | 212.799 |
| <a href="#">AMK58_24535</a> | <a href="#">no KO assigned   (GenBank) extensin.</a>                                                                  | enzyme                       | 16.874   | 19.747   | 25.472   | 218.578 | 536.747  | 129.530 |
| <a href="#">AMK58_24540</a> | <a href="#">no KO assigned   (GenBank) MBL fold metallo-hydrolase.</a>                                                | No COG                       | 195.860  | 221.662  | 202.149  | 224.349 | 310.360  | 256.678 |
| <a href="#">AMK58_24545</a> | <a href="#">no KO assigned   (GenBank) hypothetical protein.</a>                                                      | Hypothetical                 | 36.515   | 38.273   | 35.328   | 156.179 | 255.625  | 187.116 |
| <a href="#">AMK58_24550</a> | <a href="#">K13821 RHH-type transcriptional regulator, proline utilization regulon repressor / proline dehydrog.</a>  | Transcription                | 32.461   | 30.937   | 32.926   | 143.414 | 89.965   | 95.974  |
| <a href="#">AMK58_24555</a> | <a href="#">K00286 pyrroline-5-carboxylate reductase [EC:1.5.1.2]   (GenBank) pyrroline-5-carboxylate reductase.</a>  | Metabolism: Amino Acid       | 35.402   | 27.073   | 34.603   | 131.266 | 57.780   | 53.443  |
| <a href="#">AMK58_24560</a> | <a href="#">K03719 Lrp/AsnC family transcriptional regulator, leucine-responsive regulatory protein   (GenBank).</a>  | Transcription                | 39.310   | 54.800   | 62.792   | 113.390 | 100.450  | 267.309 |
| <a href="#">AMK58_24565</a> | <a href="#">no KO assigned   (GenBank) hypothetical protein.</a>                                                      | Hypothetical                 | 8.888    | 10.353   | 13.659   | 211.231 | 54.035   | 309.493 |
| <a href="#">AMK58_24570</a> | <a href="#">no KO assigned   (GenBank) hypothetical protein.</a>                                                      | Hypothetical                 | 108.446  | 100.876  | 205.831  | 141.039 | 109.245  | 221.484 |
| <a href="#">AMK58_24575</a> | <a href="#">no KO assigned   (GenBank) hypothetical protein.</a>                                                      | Hypothetical                 | 42.917   | 43.082   | 80.727   | 170.755 | 78.048   | 176.439 |
| <a href="#">AMK58_24580</a> | <a href="#">no KO assigned   (GenBank) hypothetical protein.</a>                                                      | Hypothetical                 | 5.935    | 0.000    | 31.601   | 217.838 | 17.345   | 109.518 |
| <a href="#">AMK58_24585</a> | <a href="#">no KO assigned   (GenBank) hypothetical protein.</a>                                                      | Hypothetical                 | 4.264    | 5.924    | 15.368   | 136.815 | 19.394   | 224.999 |
| <a href="#">AMK58_24590</a> | <a href="#">no KO assigned   (GenBank) hypothetical protein.</a>                                                      | Hypothetical                 | 10.988   | 6.749    | 28.999   | 128.758 | 23.663   | 192.068 |
| <a href="#">AMK58_24595</a> | <a href="#">K13015 UDP-N-acetyl-D-glucosamine dehydrogenase [EC:1.1.1.136]   (GenBank) UDP-N-acetyl-D-gluc.</a>       | Metabolism: Carbohydrate     | 34.010   | 23.299   | 94.165   | 180.773 | 47.913   | 226.894 |
| <a href="#">AMK58_24600</a> | <a href="#">K16554 polysaccharide biosynthesis transport protein   (GenBank) hypothetical protein.</a>                | Transport: polysacchharide   | 17.788   | 14.769   | 55.643   | 152.612 | 38.478   | 187.814 |
| <a href="#">AMK58_24605</a> | <a href="#">no KO assigned   (GenBank) hypothetical protein.</a>                                                      | Hypothetical                 | 8.698    | 8.834    | 21.419   | 132.475 | 19.260   | 157.436 |
| <a href="#">AMK58_24610</a> | <a href="#">no KO assigned   (GenBank) hypothetical protein.</a>                                                      | Hypothetical                 | 4.644    | 3.531    | 16.296   | 172.365 | 17.368   | 116.341 |
| <a href="#">AMK58_24615</a> | <a href="#">no KO assigned   (GenBank) hypothetical protein.</a>                                                      | Hypothetical                 | 6.159    | 10.177   | 15.573   | 203.083 | 18.264   | 137.178 |
| <a href="#">AMK58_24620</a> | <a href="#">no KO assigned   (GenBank) hypothetical protein.</a>                                                      | Hypothetical                 | 12.955   | 19.349   | 20.963   | 192.888 | 31.923   | 122.087 |
| <a href="#">AMK58_24625</a> | <a href="#">K07088 uncharacterized protein   (GenBank) permease.</a>                                                  | Enzyme                       | 97.974   | 75.502   | 85.015   | 271.402 | 49.947   | 201.607 |
| <a href="#">AMK58_24630</a> | <a href="#">K01816 hydroxypyruvate isomerase [EC:5.3.1.22]   (GenBank) hydroxypyruvate isomerase.</a>                 | Metabolism: Carbohydrate     | 174.783  | 142.104  | 127.667  | 219.948 | 97.973   | 190.673 |
| <a href="#">AMK58_24635</a> | <a href="#">K07120 uncharacterized protein   (GenBank) hypothetical protein.</a>                                      | Hypothetical                 | 31.416   | 45.693   | 47.547   | 238.472 | 100.384  | 71.682  |
| <a href="#">AMK58_24640</a> | <a href="#">no KO assigned   (GenBank) hypothetical protein.</a>                                                      | Hypothetical                 | 201.283  | 214.778  | 207.666  | 202.392 | 263.990  | 222.023 |
| <a href="#">AMK58_24645</a> | <a href="#">no KO assigned   (GenBank) flavodoxin.</a>                                                                | Enzyme                       | 1.193    | 2.376    | 2.268    | 104.129 | 82.237   | 279.107 |
| <a href="#">AMK58_24650</a> | <a href="#">no KO assigned   (GenBank) peptidase M48 Ste24p.</a>                                                      | peptidase                    | 60.225   | 50.467   | 71.094   | 284.559 | 56.793   | 185.521 |
| <a href="#">AMK58_24655</a> | <a href="#">K03496 chromosome partitioning protein   (GenBank) hypothetical protein.</a>                              | Cell Cycle/Shape/Homeostasis | 40.826   | 38.439   | 38.484   | 151.060 | 61.669   | 184.838 |
| <a href="#">AMK58_24660</a> | <a href="#">K03497 chromosome partitioning protein, ParB family   (GenBank) hypothetical protein.</a>                 | Cell Cycle/Shape/Homeostasis | 20.652   | 20.967   | 21.946   | 205.580 | 43.999   | 160.332 |
| <a href="#">AMK58_24665</a> | <a href="#">K07168 CBS domain-containing membrane protein   (GenBank) hypothetical protein.</a>                       | Membrane                     | 22.004   | 12.461   | 19.831   | 259.693 | 52.632   | 180.250 |
| <a href="#">AMK58_24670</a> | <a href="#">K02471 putative ATP-binding cassette transporter   (GenBank) hypothetical protein.</a>                    | Membrane transport           | 16.143   | 22.208   | 22.519   | 194.196 | 37.724   | 195.093 |
| <a href="#">AMK58_24675</a> | <a href="#">no KO assigned   (GenBank) chemotaxis protein.</a>                                                        | Chemotaxis                   | 5.612    | 6.420    | 7.152    | 228.404 | 58.048   | 182.023 |
| <a href="#">AMK58_24680</a> | <a href="#">K00064 D-threo-aldose 1-dehydrogenase [EC:1.1.1.122]   (GenBank) D-threo-aldose 1-dehydrogenase.</a>      | Metabolism: Carbohydrate     | 48.945   | 77.686   | 65.432   | 219.534 | 186.697  | 176.993 |
| <a href="#">AMK58_24685</a> | <a href="#">K17850 LvsR family transcriptional regulator, regulator of gene expression of beta-lactamase   (GenB.</a> | Transcription                | 18.797   | 28.075   | 24.706   | 223.098 | 102.381  | 102.914 |
| <a href="#">AMK58_24690</a> | <a href="#">K17836 beta-lactamase class A [EC:3.5.2.6]   (GenBank) class A beta-lactamase.</a>                        | Defense                      | 7.202    | 9.742    | 10.078   | 271.038 | 66.137   | 162.923 |
| <a href="#">AMK58_24695</a> | <a href="#">K08358 tetrathionate reductase subunit B   (GenBank) tetrathionate reductase subunit B.</a>               | Energy                       | 1.922    | 3.827    | 3.959    | 122.927 | 39.784   | 185.037 |
| <a href="#">AMK58_24700</a> | <a href="#">K08359 tetrathionate reductase subunit C   (GenBank) tetrathionate reductase.</a>                         | Energy                       | 1.922    | 4.465    | 3.655    | 161.042 | 34.563   | 45.541  |
| <a href="#">AMK58_24705</a> | <a href="#">K08357 tetrathionate reductase subunit A   (GenBank) tetrathionate reductase subunit A.</a>               | Energy                       | 2.220    | 5.353    | 7.260    | 255.229 | 54.472   | 127.188 |
| <a href="#">AMK58_24710</a> | <a href="#">no KO assigned   (GenBank) exodeoxyribonuclease V.</a>                                                    | No COG                       | 29.535   | 33.841   | 32.891   | 233.320 | 66.512   | 174.829 |
| <a href="#">AMK58_24715</a> | <a href="#">no KO assigned   (GenBank) hypothetical protein.</a>                                                      | Hypothetical                 | 22.328   | 29.435   | 32.891   | 330.831 | 19.560   | 72.222  |
| <a href="#">AMK58_24720</a> | <a href="#">K02028 polar amino acid transport system ATP-binding protein [EC:3.6.3.21]   (GenBank) polar amino a.</a> | Transport: Amino Acid        | 142.450  | 196.467  | 188.312  | 182.409 | 20.162   | 182.404 |
| <a href="#">AMK58_24725</a> | <a href="#">K02029 polar amino acid transport system permease protein   (GenBank) ABC transporter permease.</a>       | Transport: Amino Acid        | 265.524  | 378.589  | 354.559  | 118.398 | 75.539   | 189.148 |
| <a href="#">AMK58_24730</a> | <a href="#">K02030 polar amino acid transport system substrate-binding protein   (GenBank) ABC transporter perme.</a> | Transport: Amino Acid        | 685.180  | 938.187  | 785.781  | 163.405 | 48.093   | 167.138 |
| <a href="#">AMK58_24735</a> | <a href="#">no KO assigned   (GenBank) N-formylglutamate deformylase.</a>                                             | Cell Wall                    | 111.401  | 166.164  | 168.439  | 265.653 | 41.287   | 153.057 |
| <a href="#">AMK58_24740</a> | <a href="#">K05603 formimidoylglutamate deiminase [EC:3.5.3.13]   (GenBank) N-formimino-L-glutamate deiminase.</a>    | Metabolism: Amino Acid       | 50.469   | 69.622   | 71.206   | 161.612 | 24.753   | 65.550  |
| <a href="#">AMK58_24745</a> | <a href="#">no KO assigned   (GenBank) hypothetical protein.</a>                                                      | Hypothetical                 | 56.778   | 80.678   | 82.582   | 150.880 | 60.543   | 210.879 |
| <a href="#">AMK58_24750</a> | <a href="#">no KO assigned   (GenBank) hypothetical protein.</a>                                                      | Hypothetical                 | 28.686   | 24.821   | 38.561   | 229.498 | 78.276   | 219.036 |
| <a href="#">AMK58_24755</a> | <a href="#">K09975 uncharacterized protein   (GenBank) hypothetical protein.</a>                                      | Hypothetical                 | 33.667   | 27.485   | 38.771   | 223.251 | 68.399   | 111.300 |
| <a href="#">AMK58_24760</a> | <a href="#">K01284 peptidyl-dipeptidase Dep [EC:3.4.15.5]   (GenBank) peptidase M3.</a>                               | peptidase                    | 169.445  | 162.400  | 148.470  | 154.951 | 166.314  | 219.146 |
| <a href="#">AMK58_24765</a> | <a href="#">K02000 glycine betaine/proline transport system ATP-binding protein [EC:3.6.3.32]   (GenBank) prolin.</a> | Transport: organic           | 5.159    | 3.022    | 7.213    | 136.849 | 1107.392 | 199.872 |
| <a href="#">AMK58_24770</a> | <a href="#">K02001 glycine betaine/proline transport system permease protein   (GenBank) glycine/betaine ABC tra.</a> | Transport: organic           | 2.321    | 0.770    | 7.478    | 165.813 | 572.055  | 168.823 |
| <a href="#">AMK58_24775</a> | <a href="#">K02002 glycine betaine/proline transport system substrate-binding protein   (GenBank) glycine/betain.</a> | Transport: organic           | 21.742   | 17.861   | 24.032   | 145.803 | 661.984  | 170.862 |
| <a href="#">AMK58_24780</a> | <a href="#">no KO assigned   (GenBank) hypothetical protein.</a>                                                      | Hypothetical                 | 11.119   | 15.247   | 16.847   | 210.925 | 322.181  | 192.322 |
| <a href="#">AMK58_24785</a> | <a href="#">K07814 putative two-component system response regulator   (GenBank) transcriptional regulator.</a>        | Signal Transduction          | 19.386   | 31.833   | 19.402   | 168.412 | 162.726  | 190.795 |

|                             |                                                                                                                      |                             |          |          |          |         |         |         |
|-----------------------------|----------------------------------------------------------------------------------------------------------------------|-----------------------------|----------|----------|----------|---------|---------|---------|
| <a href="#">AMK58_24790</a> | <a href="#">no KO assigned   (GenBank) hypothetical protein.</a>                                                     | Hypothetical                | 51.559   | 71.167   | 71.168   | 175.046 | 86.132  | 140.955 |
| <a href="#">AMK58_24795</a> | <a href="#">no KO assigned   (GenBank) organic hydroperoxide resistance protein.</a>                                 | Defense                     | 23.350   | 29.279   | 23.846   | 216.634 | 141.926 | 285.218 |
| <a href="#">AMK58_24800</a> | <a href="#">no KO assigned   (GenBank) MarR family transcriptional regulator.</a>                                    | Transcription               | 34.782   | 50.762   | 52.510   | 137.289 | 64.167  | 122.118 |
| <a href="#">AMK58_24805</a> | <a href="#">no KO assigned   (GenBank) plasmid replication protein.</a>                                              | DNA Repair and Replication  | 143.341  | 125.904  | 124.287  | 102.798 | 84.025  | 184.259 |
| <a href="#">AMK58_24810</a> | <a href="#">no KO assigned   (GenBank) hypothetical protein.</a>                                                     | Hypothetical                | 34.037   | 24.693   | 43.343   | 210.874 | 36.756  | 168.517 |
| <a href="#">AMK58_24815</a> | <a href="#">no KO assigned   (GenBank) hypothetical protein.</a>                                                     | Hypothetical                | 30.489   | 28.429   | 24.465   | 243.869 | 15.254  | 59.812  |
| <a href="#">AMK58_24820</a> | <a href="#">no KO assigned   (GenBank) C4-dicarboxylate ABC transporter substrate-binding protein.</a>               | Membrane Transport          | 16.167   | 11.813   | 11.943   | 202.226 | 21.310  | 139.447 |
| <a href="#">AMK58_24825</a> | <a href="#">K01768 adenylate cyclase [EC:4.6.1.11]   (GenBank) hypothetical protein.</a>                             | Metabolism: Nucleotide      | 3.043    | 3.430    | 4.913    | 209.096 | 15.681  | 104.018 |
| <a href="#">AMK58_24830</a> | <a href="#">no KO assigned   (GenBank) hypothetical protein.</a>                                                     | Hypothetical                | 1.376    | 4.110    | 5.669    | 259.252 | 11.599  | 79.524  |
| <a href="#">AMK58_24835</a> | <a href="#">no KO assigned   (GenBank) hypothetical protein.</a>                                                     | Hypothetical                | 0.290    | 1.156    | 2.024    | 180.336 | 11.368  | 66.814  |
| <a href="#">AMK58_24840</a> | <a href="#">no KO assigned   (GenBank) hypothetical protein.</a>                                                     | Hypothetical                | 0.102    | 3.060    | 3.311    | 175.907 | 15.544  | 150.168 |
| <a href="#">AMK58_24845</a> | <a href="#">K01775 alanine racemase [EC:5.1.1.1]   (GenBank) hypothetical protein.</a>                               | Metabolism: Amino Acid      | 0.307    | 1.224    | 1.753    | 186.610 | 13.471  | 68.483  |
| <a href="#">AMK58_24850</a> | <a href="#">K07001 NTE family protein   (GenBank) alpha/beta hydrolase.</a>                                          | hydrolase                   | 2.274    | 2.717    | 2.919    | 126.094 | 23.513  | 177.734 |
| <a href="#">AMK58_24855</a> | <a href="#">K03088 RNA polymerase sigma-70 factor. ECF subfamily   (GenBank) hypothetical protein.</a>               | Transcription               | 2.458    | 3.672    | 7.012    | 393.253 | 12.435  | 354.286 |
| <a href="#">AMK58_24860</a> | <a href="#">K14235 tRNA Trp   (GenBank) tRNA-Trp.</a>                                                                | tRNA synthesis/modification | 20.710   | 38.071   | 30.294   | 471.619 | 3.581   | 827.250 |
| <a href="#">AMK58_24865</a> | <a href="#">no KO assigned   (GenBank) molybdate ABC transporter substrate-binding protein.</a>                      | Membrane Transport          | 13.559   | 18.108   | 15.319   | 169.237 | 17.931  | 209.895 |
| <a href="#">AMK58_24870</a> | <a href="#">no KO assigned   (GenBank) hemolysin activation/secretion protein.</a>                                   | Secretion system            | 57.905   | 70.326   | 60.827   | 94.902  | 27.860  | 62.575  |
| <a href="#">AMK58_24875</a> | <a href="#">no KO assigned   (GenBank) hypothetical protein.</a>                                                     | Hypothetical                | 8.157    | 7.658    | 7.165    | 14.153  | 1.965   | 11.436  |
| <a href="#">AMK58_24880</a> | <a href="#">no KO assigned   (GenBank) hypothetical protein.</a>                                                     | Hypothetical                | 0.000    | 0.000    | 0.000    | 0.000   | 0.000   | 0.000   |
| <a href="#">AMK58_24885</a> | <a href="#">no KO assigned   (GenBank) hypothetical protein.</a>                                                     | Hypothetical                | 0.320    | 0.000    | 0.000    | 0.000   | 0.000   | 0.000   |
| <a href="#">AMK58_24890</a> | <a href="#">no KO assigned   (GenBank) hypothetical protein.</a>                                                     | Hypothetical                | 0.472    | 0.000    | 0.000    | 0.000   | 0.000   | 0.000   |
| <a href="#">AMK58_24895</a> | <a href="#">no KO assigned   (GenBank) pseudogene.</a>                                                               | Pseudogene                  | 0.000    | 0.000    | 0.000    | 0.000   | 0.000   | 0.000   |
| <a href="#">AMK58_24900</a> | <a href="#">no KO assigned   (GenBank) pseudogene.</a>                                                               | Pseudogene                  | 0.000    | 0.000    | 0.000    | 0.000   | 0.000   | 0.000   |
| <a href="#">AMK58_24905</a> | <a href="#">no KO assigned   (GenBank) dehydratase.</a>                                                              | dehydratase                 | 0.000    | 0.000    | 0.000    | 0.000   | 0.000   | 0.000   |
| <a href="#">AMK58_24910</a> | <a href="#">K18292 (S)-citramalyl-CoA lyase [EC:4.1.3.25]   (GenBank) hypothetical protein.</a>                      | Metabolism: Carbohydrate    | 0.000    | 0.000    | 0.000    | 0.000   | 0.000   | 0.000   |
| <a href="#">AMK58_24915</a> | <a href="#">no KO assigned   (GenBank) hypothetical protein.</a>                                                     | Hypothetical                | 0.000    | 0.000    | 0.000    | 0.000   | 0.000   | 0.000   |
| <a href="#">AMK58_24920</a> | <a href="#">K11688 C4-dicarboxylate-binding protein DctP   (GenBank) hypothetical protein.</a>                       | Transport                   | 0.000    | 0.000    | 0.000    | 0.000   | 0.000   | 0.000   |
| <a href="#">AMK58_24925</a> | <a href="#">no KO assigned   (GenBank) 3-oxoacyl-ACP reductase.</a>                                                  | No COG                      | 0.000    | 0.000    | 0.000    | 0.000   | 0.000   | 0.000   |
| <a href="#">AMK58_24930</a> | <a href="#">no KO assigned   (GenBank) glycosyl transferase.</a>                                                     | Glycosyl Transferase        | 0.000    | 0.000    | 0.000    | 0.000   | 0.000   | 0.000   |
| <a href="#">AMK58_24935</a> | <a href="#">no KO assigned   (GenBank) hypothetical protein.</a>                                                     | Hypothetical                | 11.099   | 10.686   | 13.823   | 120.656 | 17.527  | 49.883  |
| <a href="#">AMK58_24940</a> | <a href="#">K03088 RNA polymerase sigma-70 factor. ECF subfamily   (GenBank) RNA polymerase.</a>                     | Transcription               | 43.385   | 47.018   | 55.833   | 286.258 | 353.842 | 130.607 |
| <a href="#">AMK58_24945</a> | <a href="#">no KO assigned   (GenBank) hypothetical protein.</a>                                                     | Hypothetical                | 47.085   | 45.210   | 63.156   | 158.807 | 387.803 | 91.219  |
| <a href="#">AMK58_24950</a> | <a href="#">no KO assigned   (GenBank) hypothetical protein.</a>                                                     | Hypothetical                | 35.443   | 26.276   | 59.035   | 165.998 | 354.482 | 130.262 |
| <a href="#">AMK58_24955</a> | <a href="#">K06867 uncharacterized protein   (GenBank) hypothetical protein.</a>                                     | Hypothetical                | 10.257   | 10.657   | 12.296   | 137.694 | 392.239 | 94.488  |
| <a href="#">AMK58_24960</a> | <a href="#">K03566 LvsR family transcriptional regulator. glycine cleavage system transcriptional activator   (G</a> | Transcription               | 10.511   | 14.731   | 18.508   | 240.584 | 101.669 | 100.597 |
| <a href="#">AMK58_24965</a> | <a href="#">no KO assigned   (GenBank) hypothetical protein.</a>                                                     | Hypothetical                | 45.707   | 66.816   | 58.253   | 244.256 | 95.648  | 102.350 |
| <a href="#">AMK58_24970</a> | <a href="#">no KO assigned   (GenBank) hypothetical protein.</a>                                                     | Hypothetical                | 28.128   | 42.013   | 39.827   | 163.824 | 64.610  | 59.820  |
| <a href="#">AMK58_24975</a> | <a href="#">K01759 lactoylglutathione lyase [EC:4.4.1.5]   (GenBank) lactoylglutathione lyase.</a>                   | Metabolism: Carbohydrate    | 1102.820 | 1158.100 | 1030.256 | 103.619 | 63.579  | 214.050 |
| <a href="#">AMK58_24980</a> | <a href="#">no KO assigned   (GenBank) Twin-arginine translocation pathway signal.</a>                               | No COG                      | 752.287  | 884.101  | 795.681  | 242.564 | 44.164  | 154.643 |
| <a href="#">AMK58_24985</a> | <a href="#">no KO assigned   (GenBank) 2-keeto-glucuronate dehydrogenase.</a>                                        | dehydrogenase               | 1025.670 | 1152.675 | 1052.181 | 129.068 | 78.522  | 227.110 |
| <a href="#">AMK58_24990</a> | <a href="#">no KO assigned   (GenBank) pseudogene.</a>                                                               | Pseudogene                  | 320.944  | 430.569  | 345.357  | 430.565 | 115.031 | 479.819 |
| <a href="#">AMK58_24995</a> | <a href="#">K01854 UDP-galactopyranose mutase [EC:5.4.99.9]   (GenBank) UDP-galactopyranose mutase.</a>              | Metabolism: Carbohydrate    | 3.258    | 5.651    | 5.296    | 181.051 | 34.378  | 197.398 |
| <a href="#">AMK58_25000</a> | <a href="#">no KO assigned   (GenBank) beta-glucosidase.</a>                                                         | No COG                      | 1.054    | 4.407    | 3.206    | 297.411 | 15.161  | 86.865  |
| <a href="#">AMK58_25005</a> | <a href="#">K06147 ATP-binding cassette, subfamily B, bacterial   (GenBank) ABC transporter.</a>                     | Transport                   | 1.028    | 4.503    | 5.277    | 207.712 | 30.269  | 149.502 |
| <a href="#">AMK58_25010</a> | <a href="#">no KO assigned   (GenBank) hypothetical protein.</a>                                                     | Hypothetical                | 43.441   | 64.460   | 63.132   | 222.931 | 64.924  | 173.087 |
| <a href="#">AMK58_25015</a> | <a href="#">K02824 uracil permease   (GenBank) uracil permease.</a>                                                  | Transport                   | 153.952  | 90.488   | 103.967  | 227.258 | 115.435 | 198.677 |
| <a href="#">AMK58_25020</a> | <a href="#">K13069 diguanilate cyclase [EC:2.7.7.65]   (GenBank) diguanilate cyclase.</a>                            | cyclic nucleotide           | 43.454   | 56.901   | 56.711   | 177.814 | 82.700  | 227.078 |
| <a href="#">AMK58_25025</a> | <a href="#">no KO assigned   (GenBank) hypothetical protein.</a>                                                     | Hypothetical                | 68.609   | 69.322   | 82.742   | 225.371 | 506.380 | 295.643 |
| <a href="#">AMK58_25030</a> | <a href="#">K13609 delta1-piperidine-2-carboxylate reductase [EC:1.5.1.21]   (GenBank) lactate dehydrogenase.</a>    | Metabolism: Amino Acid      | 71.990   | 60.099   | 77.092   | 222.904 | 37.872  | 124.856 |
| <a href="#">AMK58_25035</a> | <a href="#">K02433 aspartyl-tRNA(Asn)/glutamyl-tRNA(Gln) amidotransferase subunit A [EC:6.3.5.6, 3.5.7]   (Gen</a>   | tRNA synthesis/modification | 29.072   | 27.510   | 27.814   | 159.646 | 23.748  | 49.395  |
| <a href="#">AMK58_25040</a> | <a href="#">K00681 gamma-glutamyltranspeptidase / glutathione hydrolase [EC:2.3.2.3, 4.19.13]   (GenBank) gamma</a>  | Metabolism: Amino Acid      | 18.005   | 20.967   | 21.979   | 125.497 | 22.039  | 41.880  |
| <a href="#">AMK58_25045</a> | <a href="#">no KO assigned   (GenBank) hypothetical protein.</a>                                                     | Hypothetical                | 280.631  | 243.922  | 261.026  | 94.294  | 128.181 | 187.551 |
| <a href="#">AMK58_25050</a> | <a href="#">K09947 uncharacterized protein   (GenBank) hypothetical protein.</a>                                     | Hypothetical                | 118.599  | 118.309  | 115.631  | 147.049 | 13.912  | 73.649  |
| <a href="#">AMK58_25055</a> | <a href="#">K07338 uncharacterized protein   (GenBank) hypothetical protein.</a>                                     | Hypothetical                | 63.956   | 63.244   | 58.084   | 124.963 | 7.313   | 28.016  |
| <a href="#">AMK58_25060</a> | <a href="#">no KO assigned   (GenBank) hypothetical protein.</a>                                                     | Hypothetical                | 216.721  | 189.327  | 170.526  | 194.829 | 10.285  | 73.239  |
| <a href="#">AMK58_25065</a> | <a href="#">K07231 putative iron-regulated protein   (GenBank) peptidase.</a>                                        | peptidase                   | 2361.289 | 2133.362 | 1922.603 | 200.422 | 59.813  | 218.404 |
| <a href="#">AMK58_25070</a> | <a href="#">no KO assigned   (GenBank) methylamine utilization protein MauG.</a>                                     | No COG                      | 146.842  | 127.978  | 122.400  | 167.869 | 76.538  | 192.490 |
| <a href="#">AMK58_25075</a> | <a href="#">K02651 pilus assembly protein Flh/PilA   (GenBank) pilus assembly protein.</a>                           | Secretion System            | 113.117  | 163.010  | 319.955  | 395.185 | 26.196  | 430.631 |
| <a href="#">AMK58_25080</a> | <a href="#">K02278 prepilin peptidase CpaA [EC:3.4.23.43]   (GenBank) hypothetical protein.</a>                      | Secretion system            | 23.666   | 30.298   | 72.125   | 225.305 | 21.138  | 140.876 |
| <a href="#">AMK58_25085</a> | <a href="#">K02279 pilus assembly protein CpaB   (GenBank) hypothetical protein.</a>                                 | Secretion System            | 4.189    | 6.675    | 17.128   | 218.306 | 10.517  | 61.250  |
| <a href="#">AMK58_25090</a> | <a href="#">K02280 pilus assembly protein CpaC   (GenBank) hypothetical protein.</a>                                 | Secretion System            | 7.624    | 10.397   | 20.881   | 167.403 | 18.723  | 168.981 |
| <a href="#">AMK58_25095</a> | <a href="#">K02281 pilus assembly protein CpaD   (GenBank) hypothetical protein.</a>                                 | Secretion System            | 4.338    | 5.634    | 9.145    | 198.311 | 16.323  | 58.408  |
| <a href="#">AMK58_25100</a> | <a href="#">K02282 pilus assembly protein CpaE   (GenBank) hypothetical protein.</a>                                 | Secretion System            | 1.498    | 4.775    | 5.984    | 77.614  | 5.165   | 28.067  |
| <a href="#">AMK58_25105</a> | <a href="#">K02283 pilus assembly protein CpaF   (GenBank) hypothetical protein.</a>                                 | Secretion System            | 4.687    | 9.334    | 18.898   | 151.025 | 17.658  | 138.265 |
| <a href="#">AMK58_25110</a> | <a href="#">no KO assigned   (GenBank) hypothetical protein.</a>                                                     | Hypothetical                | 2.256    | 2.995    | 8.938    | 121.052 | 7.467   | 59.157  |
| <a href="#">AMK58_25115</a> | <a href="#">K12511 tight adherence protein C   (GenBank) hypothetical protein.</a>                                   | Secretion system            | 0.828    | 1.414    | 2.813    | 101.148 | 5.321   | 42.911  |
| <a href="#">AMK58_25120</a> | <a href="#">no KO assigned   (GenBank) hypothetical protein.</a>                                                     | Hypothetical                | 2.914    | 5.223    | 7.342    | 158.673 | 11.955  | 73.090  |

|                             |                                                                                                                                           |                             |         |         |         |         |         |         |
|-----------------------------|-------------------------------------------------------------------------------------------------------------------------------------------|-----------------------------|---------|---------|---------|---------|---------|---------|
| <a href="#">AMK58_25125</a> | <a href="#">no KO assigned   (GenBank) hypothetical protein</a>                                                                           | Hypothetical                | 8.364   | 4.997   | 20.678  | 298.041 | 20.214  | 130.690 |
| <a href="#">AMK58_25130</a> | <a href="#">no KO assigned   (GenBank) hypothetical protein</a>                                                                           | Hypothetical                | 7.901   | 14.033  | 13.197  | 276.317 | 26.643  | 111.874 |
| <a href="#">AMK58_25135</a> | <a href="#">no KO assigned   (GenBank) hypothetical protein</a>                                                                           | Hypothetical                | 7.112   | 5.631   | 14.502  | 229.907 | 33.518  | 215.640 |
| <a href="#">AMK58_25140</a> | <a href="#">no KO assigned   (GenBank) hypothetical protein</a>                                                                           | Hypothetical                | 424.246 | 522.745 | 386.186 | 56.657  | 63.510  | 212.265 |
| <a href="#">AMK58_25145</a> | <a href="#">K14220 tRNA Asn   (GenBank) tRNA-Asn</a>                                                                                      | tRNA synthesis/modification | 87.620  | 104.696 | 106.031 | 29.876  | 19.698  | 161.018 |
| <a href="#">AMK58_25150</a> | <a href="#">K14221 tRNA Asp   (GenBank) tRNA-Asp</a>                                                                                      | tRNA synthesis/modification | 0.000   | 9.394   | 0.000   | 0.000   | 0.000   | 4.374   |
| <a href="#">AMK58_25155</a> | <a href="#">K14225 tRNA Gly   (GenBank) tRNA-Glv</a>                                                                                      | tRNA synthesis/modification | 172.733 | 221.829 | 190.330 | 190.298 | 16.331  | 399.680 |
| <a href="#">AMK58_25160</a> | <a href="#">no KO assigned   (GenBank) AraC family transcriptional regulator</a>                                                          | Transcription               | 10.247  | 17.896  | 15.439  | 275.800 | 62.199  | 193.841 |
| <a href="#">AMK58_25165</a> | <a href="#">K07006 uncharacterized protein   (GenBank) pyridoxamine 5'-phosphate oxidase</a>                                              | enzyme                      | 5.600   | 8.076   | 6.977   | 171.757 | 37.116  | 287.210 |
| <a href="#">AMK58_25170</a> | <a href="#">K01985 5S ribosomal RNA   (GenBank) 5S ribosomal RNA</a>                                                                      | Ribosome                    | 0.000   | 6.236   | 2.977   | 27.963  | 0.000   | 20.325  |
| <a href="#">AMK58_25175</a> | <a href="#">K01980 23S ribosomal RNA   (GenBank) 23S ribosomal RNA</a>                                                                    | Ribosome                    | 0.000   | 0.000   | 0.000   | 0.000   | 0.000   | 0.000   |
| <a href="#">AMK58_25180</a> | <a href="#">K14218 tRNA Ala   (GenBank) tRNA-Ala</a>                                                                                      | tRNA synthesis/modification | 0.000   | 0.000   | 0.000   | 0.000   | 0.000   | 0.000   |
| <a href="#">AMK58_25185</a> | <a href="#">K14227 tRNA Ile   (GenBank) tRNA-Ile</a>                                                                                      | tRNA synthesis/modification | 0.000   | 0.000   | 0.000   | 0.000   | 0.000   | 0.000   |
| <a href="#">AMK58_25190</a> | <a href="#">K01977 16S ribosomal RNA   (GenBank) 16S ribosomal RNA</a>                                                                    | Ribosome                    | 0.000   | 0.000   | 0.000   | 0.000   | 0.000   | 0.000   |
| <a href="#">AMK58_25195</a> | <a href="#">no KO assigned   (GenBank) pseudogene</a>                                                                                     | Pseudogene                  | 5.717   | 14.065  | 9.913   | 113.981 | 26.463  | 199.591 |
| <a href="#">AMK58_25200</a> | <a href="#">no KO assigned   (GenBank) glycosyl transferase</a>                                                                           | Glycosyl Transferase        | 3.048   | 5.023   | 7.395   | 171.900 | 16.894  | 67.050  |
| <a href="#">AMK58_25205</a> | <a href="#">no KO assigned   (GenBank) acyltransferase</a>                                                                                | Acyltransferase             | 3.548   | 6.183   | 5.482   | 152.284 | 15.121  | 22.893  |
| <a href="#">AMK58_25210</a> | <a href="#">no KO assigned   (GenBank) phytoene desaturase</a>                                                                            | No COG                      | 19.630  | 19.233  | 23.517  | 190.269 | 63.192  | 120.788 |
| <a href="#">AMK58_25215</a> | <a href="#">K10027 phytoene desaturase [EC:1.3.99.26   1.3.99.28   1.3.99.31   1.3.99.31]   (GenBank) phytoene desaturase</a>             | Metabolism                  | 20.098  | 21.218  | 26.708  | 208.355 | 190.893 | 162.866 |
| <a href="#">AMK58_25220</a> | <a href="#">no KO assigned   (GenBank) aldehyde dehydrogenase</a>                                                                         | dehydrogenase               | 4.805   | 5.741   | 8.040   | 153.562 | 68.587  | 27.978  |
| <a href="#">AMK58_25225</a> | <a href="#">no KO assigned   (GenBank) hypothetical protein</a>                                                                           | Hypothetical                | 6.147   | 4.790   | 12.706  | 232.001 | 79.913  | 113.013 |
| <a href="#">AMK58_25230</a> | <a href="#">K14218 tRNA Ala   (GenBank) tRNA-Ala</a>                                                                                      | tRNA synthesis/modification | 79.654  | 76.143  | 72.707  | 207.000 | 82.372  | 515.554 |
| <a href="#">AMK58_25235</a> | <a href="#">K14228 tRNA Leu   (GenBank) tRNA-Leu</a>                                                                                      | tRNA synthesis/modification | 50.100  | 133.031 | 23.818  | 65.247  | 70.393  | 238.734 |
| <a href="#">AMK58_25240</a> | <a href="#">no KO assigned   (GenBank) hypothetical protein</a>                                                                           | Hypothetical                | 0.844   | 1.576   | 3.110   | 214.976 | 103.122 | 101.459 |
| <a href="#">AMK58_25245</a> | <a href="#">K00134 glyceraldehyde 3-phosphate dehydrogenase [EC:1.2.1.12]   (GenBank) gapA: glyceraldehyde-3-phosphate dehydrogenase</a>  | Metabolism                  | 3.906   | 4.243   | 6.639   | 63.257  | 46.163  | 74.627  |
| <a href="#">AMK58_25250</a> | <a href="#">no KO assigned   (GenBank) hypothetical protein</a>                                                                           | Hypothetical                | 5.281   | 2.253   | 8.248   | 188.459 | 37.733  | 114.543 |
| <a href="#">AMK58_25255</a> | <a href="#">K02410 flagellar motor switch protein FljG   (GenBank) flagellar motor switch protein FljG</a>                                | Motility                    | 6.983   | 6.364   | 5.401   | 154.417 | 34.589  | 190.738 |
| <a href="#">AMK58_25260</a> | <a href="#">no KO assigned   (GenBank) hypothetical protein</a>                                                                           | Hypothetical                | 0.747   | 4.465   | 2.487   | 174.200 | 16.802  | 99.795  |
| <a href="#">AMK58_25265</a> | <a href="#">K02419 flagellar biosynthetic protein FljP   (GenBank) flagellar biosynthetic protein fljP</a>                                | Motility                    | 9.469   | 7.419   | 7.822   | 225.397 | 40.653  | 176.609 |
| <a href="#">AMK58_25270</a> | <a href="#">K02417 flagellar motor switch protein FljN   (GenBank) flagellar motor switch protein FljN</a>                                | Motility                    | 7.788   | 6.345   | 8.752   | 109.547 | 29.049  | 135.249 |
| <a href="#">AMK58_25275</a> | <a href="#">K02411 flagellar assembly protein FljH   (GenBank) hypothetical protein</a>                                                   | Motility                    | 3.143   | 4.941   | 2.202   | 129.173 | 7.437   | 32.822  |
| <a href="#">AMK58_25280</a> | <a href="#">K02409 flagellar M-ring protein FljF   (GenBank) flagellar M-ring protein FljF</a>                                            | Motility                    | 3.986   | 1.276   | 5.346   | 163.807 | 14.561  | 116.032 |
| <a href="#">AMK58_25285</a> | <a href="#">K02415 flagellar FljL protein   (GenBank) flagellar basal body protein FljL</a>                                               | Motility                    | 7.975   | 7.219   | 5.974   | 160.244 | 14.397  | 121.233 |
| <a href="#">AMK58_25290</a> | <a href="#">K02416 flagellar motor switch protein FljM   (GenBank) fljM: flagellar motor switch protein FljM</a>                          | Motility                    | 10.062  | 4.574   | 6.447   | 102.996 | 25.694  | 209.631 |
| <a href="#">AMK58_25295</a> | <a href="#">no KO assigned   (GenBank) hypothetical protein</a>                                                                           | Hypothetical                | 4.791   | 3.303   | 3.855   | 90.597  | 10.150  | 35.885  |
| <a href="#">AMK58_25300</a> | <a href="#">no KO assigned   (GenBank) flagellar motor switch protein</a>                                                                 | Motility                    | 4.354   | 2.001   | 3.821   | 72.232  | 10.729  | 45.498  |
| <a href="#">AMK58_25305</a> | <a href="#">no KO assigned   (GenBank) hypothetical protein</a>                                                                           | Hypothetical                | 1.581   | 2.778   | 2.122   | 91.557  | 5.331   | 27.852  |
| <a href="#">AMK58_25310</a> | <a href="#">K02389 flagellar basal-body rod modification protein FlgD   (GenBank) flagellar biosynthesis protein</a>                      | Motility                    | 13.019  | 12.223  | 9.903   | 72.996  | 16.306  | 186.426 |
| <a href="#">AMK58_25315</a> | <a href="#">no KO assigned   (GenBank) hypothetical protein</a>                                                                           | Hypothetical                | 18.516  | 20.545  | 18.600  | 162.099 | 15.334  | 141.127 |
| <a href="#">AMK58_25320</a> | <a href="#">K02569 cytochrome c-type protein NapC   (GenBank) cytochrome C</a>                                                            | Energy                      | 173.911 | 139.779 | 189.084 | 88.536  | 33.749  | 258.347 |
| <a href="#">AMK58_25325</a> | <a href="#">K02568 cytochrome c-type protein NapB   (GenBank) nitrate reductase</a>                                                       | Energy                      | 99.266  | 71.886  | 99.150  | 202.816 | 30.994  | 144.812 |
| <a href="#">AMK58_25330</a> | <a href="#">K02567 periplasmic nitrate reductase NapA [EC:1.7.99.4]   (GenBank) nitrate reductase</a>                                     | Nitrogen                    | 104.633 | 72.883  | 97.835  | 158.310 | 50.730  | 195.656 |
| <a href="#">AMK58_25335</a> | <a href="#">K02570 periplasmic nitrate reductase NapD   (GenBank) nitrate reductase</a>                                                   | Nitrogen                    | 55.596  | 41.827  | 48.162  | 193.630 | 13.887  | 218.429 |
| <a href="#">AMK58_25340</a> | <a href="#">K02571 periplasmic nitrate reductase NapE   (GenBank) nitrate reductase</a>                                                   | Nitrogen                    | 35.570  | 36.781  | 33.820  | 84.300  | 22.298  | 258.791 |
| <a href="#">AMK58_25345</a> | <a href="#">no KO assigned   (GenBank) hypothetical protein</a>                                                                           | Hypothetical                | 2.446   | 4.384   | 4.419   | 243.115 | 15.121  | 143.342 |
| <a href="#">AMK58_25350</a> | <a href="#">K02393 flagellar L-ring protein precursor FlgH   (GenBank) flagellar biosynthesis protein FlgH</a>                            | Motility                    | 6.509   | 9.723   | 4.797   | 231.725 | 16.829  | 219.409 |
| <a href="#">AMK58_25355</a> | <a href="#">K02386 flagella basal body P-ring formation protein FlgA   (GenBank) flagellin biosynthesis protein</a>                       | Motility                    | 6.536   | 0.976   | 6.370   | 230.475 | 17.081  | 102.876 |
| <a href="#">AMK58_25360</a> | <a href="#">K02392 flagellar basal-body rod protein FlgG   (GenBank) flgG: flagellar basal-body rod protein FlgG</a>                      | Motility                    | 15.250  | 7.362   | 8.934   | 156.408 | 20.431  | 168.833 |
| <a href="#">AMK58_25365</a> | <a href="#">K02391 flagellar basal-body rod protein FlgF   (GenBank) flagellar biosynthesis protein FlgF</a>                              | Motility                    | 7.806   | 3.969   | 11.212  | 191.108 | 21.469  | 214.067 |
| <a href="#">AMK58_25370</a> | <a href="#">no KO assigned   (GenBank) hypothetical protein</a>                                                                           | Hypothetical                | 0.757   | 0.603   | 2.302   | 126.843 | 4.480   | 56.649  |
| <a href="#">AMK58_25375</a> | <a href="#">K02556 chemotaxis protein MotA   (GenBank) flagellar motor stator protein MotA</a>                                            | Chemotaxis                  | 5.863   | 6.517   | 6.482   | 197.253 | 16.092  | 168.910 |
| <a href="#">AMK58_25380</a> | <a href="#">K02557 chemotaxis protein MotB   (GenBank) chemotaxis protein</a>                                                             | Chemotaxis                  | 2.674   | 1.521   | 4.237   | 176.170 | 17.173  | 116.992 |
| <a href="#">AMK58_25385</a> | <a href="#">no KO assigned   (GenBank) hypothetical protein</a>                                                                           | Hypothetical                | 15.122  | 14.958  | 26.090  | 240.931 | 89.040  | 122.392 |
| <a href="#">AMK58_25390</a> | <a href="#">K09965 uncharacterized protein   (GenBank) hypothetical protein</a>                                                           | Hypothetical                | 31.560  | 30.854  | 34.918  | 193.188 | 93.094  | 266.219 |
| <a href="#">AMK58_25395</a> | <a href="#">no KO assigned   (GenBank) hypothetical protein</a>                                                                           | Hypothetical                | 11.429  | 14.937  | 11.546  | 71.285  | 47.372  | 319.257 |
| <a href="#">AMK58_25400</a> | <a href="#">no KO assigned   (GenBank) hypothetical protein</a>                                                                           | Hypothetical                | 27.802  | 30.810  | 28.140  | 100.015 | 26.715  | 267.160 |
| <a href="#">AMK58_25405</a> | <a href="#">no KO assigned   (GenBank) glycerol-3-phosphate dehydrogenase</a>                                                             | dehydrogenase               | 12.898  | 9.943   | 13.055  | 166.087 | 27.593  | 297.071 |
| <a href="#">AMK58_25410</a> | <a href="#">no KO assigned   (GenBank) glycerol-3-phosphate dehydrogenase</a>                                                             | dehydrogenase               | 23.767  | 18.754  | 25.582  | 124.943 | 47.885  | 295.228 |
| <a href="#">AMK58_25415</a> | <a href="#">no KO assigned   (GenBank) glycerol-3-phosphate dehydrogenase</a>                                                             | dehydrogenase               | 15.418  | 16.255  | 20.264  | 269.095 | 27.015  | 279.623 |
| <a href="#">AMK58_25420</a> | <a href="#">no KO assigned   (GenBank) glycerol-3-phosphate dehydrogenase</a>                                                             | dehydrogenase               | 17.296  | 10.599  | 14.337  | 200.802 | 38.385  | 189.172 |
| <a href="#">AMK58_25425</a> | <a href="#">no KO assigned   (GenBank) hypothetical protein</a>                                                                           | Hypothetical                | 4.657   | 0.000   | 3.936   | 92.876  | 29.661  | 171.283 |
| <a href="#">AMK58_25430</a> | <a href="#">no KO assigned   (GenBank) pseudogene</a>                                                                                     | Pseudogene                  | 1.899   | 0.000   | 4.966   | 250.593 | 6.938   | 150.133 |
| <a href="#">AMK58_25435</a> | <a href="#">no KO assigned   (GenBank) hypothetical protein</a>                                                                           | Hypothetical                | 6.899   | 6.183   | 10.495  | 107.200 | 13.958  | 221.341 |
| <a href="#">AMK58_25440</a> | <a href="#">no KO assigned   (GenBank) hypothetical protein</a>                                                                           | Hypothetical                | 4.848   | 2.694   | 6.324   | 141.497 | 13.939  | 129.936 |
| <a href="#">AMK58_25445</a> | <a href="#">no KO assigned   (GenBank) hypothetical protein</a>                                                                           | Hypothetical                | 3.669   | 9.590   | 7.195   | 209.797 | 10.310  | 53.158  |
| <a href="#">AMK58_25450</a> | <a href="#">no KO assigned   (GenBank) hypothetical protein</a>                                                                           | Hypothetical                | 1.155   | 1.841   | 4.247   | 204.796 | 8.398   | 103.414 |
| <a href="#">AMK58_25455</a> | <a href="#">K04072 acetaldehyde dehydrogenase / alcohol dehydrogenase [EC:1.2.1.10   1.1.1.11]   (GenBank) acetaldehyde dehydrogenase</a> | Metabolism                  | 32.059  | 30.787  | 33.127  | 196.517 | 117.691 | 209.908 |

|                             |                                                                                                                          |                                     |          |          |          |          |          |          |
|-----------------------------|--------------------------------------------------------------------------------------------------------------------------|-------------------------------------|----------|----------|----------|----------|----------|----------|
| <a href="#">AMK58_25460</a> | <a href="#">K14231 tRNA Phe   (GenBank) tRNA-Phe</a>                                                                     | tRNA synthesis/modification         | 25.489   | 38.071   | 24.236   | 234.743  | 89.535   | 426.920  |
| <a href="#">AMK58_25465</a> | <a href="#">no KO assigned   (GenBank) hypothetical protein</a>                                                          | Hypothetical                        | 7.160    | 15.556   | 12.997   | 126.435  | 105.362  | 475.637  |
| <a href="#">AMK58_25470</a> | <a href="#">no KO assigned   (GenBank) hypothetical protein</a>                                                          | Hypothetical                        | 14.304   | 9.156    | 17.972   | 112.230  | 32.157   | 412.129  |
| <a href="#">AMK58_25475</a> | <a href="#">no KO assigned   (GenBank) hypothetical protein</a>                                                          | Hypothetical                        | 60.764   | 46.056   | 40.960   | 140.318  | 136.093  | 975.106  |
| <a href="#">AMK58_25480</a> | <a href="#">no KO assigned   (GenBank) hypothetical protein</a>                                                          | Hypothetical                        | 18.048   | 14.976   | 17.637   | 166.551  | 53.817   | 408.866  |
| <a href="#">AMK58_25485</a> | <a href="#">no KO assigned   (GenBank) hypothetical protein</a>                                                          | Hypothetical                        | 13.305   | 9.274    | 12.650   | 64.161   | 80.759   | 276.356  |
| <a href="#">AMK58_25490</a> | <a href="#">no KO assigned   (GenBank) hypothetical protein</a>                                                          | Hypothetical                        | 18.022   | 15.165   | 16.411   | 36.041   | 76.463   | 195.589  |
| <a href="#">AMK58_25495</a> | <a href="#">no KO assigned   (GenBank) hypothetical protein</a>                                                          | Hypothetical                        | 14.927   | 26.424   | 15.507   | 124.417  | 153.493  | 414.219  |
| <a href="#">AMK58_25500</a> | <a href="#">K05554 aromatase [EC:4.2.1.-]   (GenBank) hypothetical protein</a>                                           | Metabolism                          | 9.589    | 12.825   | 13.607   | 64.606   | 63.221   | 178.888  |
| <a href="#">AMK58_25505</a> | <a href="#">K12420 ketoreductase [EC:1.1.1.-]   (GenBank) ketoacyl reductase</a>                                         | Biosynthesis                        | 14.180   | 13.964   | 17.038   | 199.340  | 121.556  | 377.845  |
| <a href="#">AMK58_25510</a> | <a href="#">K05551 minimal PKS ketosynthase (KS/KS alpha) [EC:2.3.1.-2.3.1.235]   (GenBank) hypothetical protei</a>      | Metabolism                          | 4.165    | 6.083    | 5.369    | 124.739  | 47.757   | 116.905  |
| <a href="#">AMK58_25515</a> | <a href="#">no KO assigned   (GenBank) hypothetical protein</a>                                                          | Hypothetical                        | 3.698    | 3.156    | 6.730    | 20.804   | 13.301   | 50.943   |
| <a href="#">AMK58_25520</a> | <a href="#">K02078 acyl carrier protein   (GenBank) hypothetical protein</a>                                             | Lipid metabolism                    | 205.777  | 279.817  | 217.921  | 266.305  | 208.900  | 443.535  |
| <a href="#">AMK58_25525</a> | <a href="#">no KO assigned   (GenBank) hypothetical protein</a>                                                          | Hypothetical                        | 13.753   | 5.388    | 9.432    | 107.822  | 64.879   | 268.862  |
| <a href="#">AMK58_25530</a> | <a href="#">no KO assigned   (GenBank) hypothetical protein</a>                                                          | Hypothetical                        | 11.677   | 12.240   | 13.051   | 162.460  | 66.320   | 254.174  |
| <a href="#">AMK58_25535</a> | <a href="#">no KO assigned   (GenBank) hypothetical protein</a>                                                          | Hypothetical                        | 13.144   | 15.485   | 9.857    | 89.525   | 59.099   | 162.911  |
| <a href="#">AMK58_25540</a> | <a href="#">no KO assigned   (GenBank) hypothetical protein</a>                                                          | Hypothetical                        | 8.690    | 6.922    | 6.977    | 131.146  | 27.566   | 220.600  |
| <a href="#">AMK58_25545</a> | <a href="#">no KO assigned   (GenBank) 3-ketoacyl-ACP reductase</a>                                                      | No COG                              | 5.526    | 10.005   | 7.643    | 124.051  | 33.506   | 231.061  |
| <a href="#">AMK58_25550</a> | <a href="#">K06133 4'-phosphopantetheinyl transferase [EC:2.7.8.-]   (GenBank) hypothetical protein</a>                  | Metabolism: Co-Factors and Vitamins | 0.761    | 3.412    | 3.258    | 346.048  | 36.591   | 215.007  |
| <a href="#">AMK58_25555</a> | <a href="#">no KO assigned   (GenBank) hypothetical protein</a>                                                          | Hypothetical                        | 59.337   | 61.475   | 69.245   | 375.064  | 206.132  | 650.189  |
| <a href="#">AMK58_25560</a> | <a href="#">no KO assigned   (GenBank) multidrug transporter AcrB</a>                                                    | Defense                             | 13.661   | 19.355   | 18.110   | 246.259  | 84.718   | 179.479  |
| <a href="#">AMK58_25565</a> | <a href="#">no KO assigned   (GenBank) helicase SNF2</a>                                                                 | DNA Repair and Replication          | 2.932    | 2.885    | 4.231    | 71.805   | 9.616    | 31.890   |
| <a href="#">AMK58_25570</a> | <a href="#">no KO assigned   (GenBank) LysR family transcriptional regulator</a>                                         | Transcription                       | 853.478  | 883.047  | 872.136  | 472.023  | 168.964  | 171.411  |
| <a href="#">AMK58_25575</a> | <a href="#">K01652 acetolactate synthase I/II/III large subunit [EC:2.2.1.6]   (GenBank) thiamine pyrophosphate-</a>     | Biosynthesis: Amino Acid            | 515.600  | 529.422  | 542.733  | 180.239  | 73.137   | 119.123  |
| <a href="#">AMK58_25580</a> | <a href="#">K00128 aldehyde dehydrogenase (NAD+)[EC:1.2.1.31]   (GenBank) aldehyde dehydrogenase</a>                     | Energy                              | 16.433   | 17.807   | 14.629   | 36.149   | 63.564   | 64.538   |
| <a href="#">AMK58_25585</a> | <a href="#">no KO assigned   (GenBank) hypothetical protein</a>                                                          | Hypothetical                        | 195.676  | 142.479  | 202.912  | 582.395  | 211.701  | 1076.201 |
| <a href="#">AMK58_25590</a> | <a href="#">no KO assigned   (GenBank) hypothetical protein</a>                                                          | Hypothetical                        | 350.171  | 309.555  | 330.160  | 200.725  | 19.912   | 120.915  |
| <a href="#">AMK58_25595</a> | <a href="#">K09796 periplasmic copper chaperone A   (GenBank) hypothetical protein</a>                                   | Chaperone                           | 306.150  | 322.443  | 280.191  | 254.635  | 25.769   | 83.261   |
| <a href="#">AMK58_25600</a> | <a href="#">no KO assigned   (GenBank) hypothetical protein</a>                                                          | Hypothetical                        | 4.355    | 12.143   | 12.975   | 497.059  | 162.529  | 664.195  |
| <a href="#">AMK58_25605</a> | <a href="#">no KO assigned   (GenBank) hypothetical protein</a>                                                          | Hypothetical                        | 2.613    | 2.168    | 4.762    | 96.553   | 78.572   | 200.039  |
| <a href="#">AMK58_25610</a> | <a href="#">K08482 circadian clock protein KaiC   (GenBank) circadian clock protein KaiC</a>                             | No COG                              | 2.281    | 3.760    | 4.039    | 125.723  | 5.217    | 78.786   |
| <a href="#">AMK58_25615</a> | <a href="#">no KO assigned   (GenBank) hypothetical protein</a>                                                          | Hypothetical                        | 231.550  | 293.483  | 291.286  | 979.122  | 105.621  | 604.253  |
| <a href="#">AMK58_25620</a> | <a href="#">no KO assigned   (GenBank) hypothetical protein</a>                                                          | Hypothetical                        | 8.795    | 7.663    | 8.319    | 67.808   | 20.339   | 87.972   |
| <a href="#">AMK58_25625</a> | <a href="#">no KO assigned   (GenBank) hypothetical protein</a>                                                          | Hypothetical                        | 15.786   | 18.863   | 16.054   | 180.574  | 22.836   | 158.730  |
| <a href="#">AMK58_25630</a> | <a href="#">no KO assigned   (GenBank) hypothetical protein</a>                                                          | Hypothetical                        | 43.174   | 37.383   | 32.721   | 113.362  | 54.156   | 304.027  |
| <a href="#">AMK58_25635</a> | <a href="#">no KO assigned   (GenBank) plasmid replication initiator protein</a>                                         | DNA Repair and Replication          | 7.166    | 9.014    | 8.966    | 196.543  | 30.808   | 106.674  |
| <a href="#">AMK58_25640</a> | <a href="#">no KO assigned   (GenBank) LysR family transcriptional regulator</a>                                         | Transcription                       | 6.589    | 6.561    | 7.962    | 248.428  | 31.169   | 150.457  |
| <a href="#">AMK58_25645</a> | <a href="#">no KO assigned   (GenBank) hypothetical protein</a>                                                          | Hypothetical                        | 0.116    | 0.693    | 0.441    | 42.566   | 5.214    | 31.939   |
| <a href="#">AMK58_25650</a> | <a href="#">K10778 AraC family transcriptional regulator, regulatory protein of adaptative response / methylated</a>     | Transcription                       | 3.145    | 0.000    | 2.990    | 86.359   | 19.442   | 151.151  |
| <a href="#">AMK58_25655</a> | <a href="#">no KO assigned   (GenBank) hypothetical protein</a>                                                          | Hypothetical                        | 154.821  | 147.123  | 146.121  | 189.980  | 151.471  | 249.065  |
| <a href="#">AMK58_25660</a> | <a href="#">no KO assigned   (GenBank) hypothetical protein</a>                                                          | Hypothetical                        | 3834.035 | 3916.517 | 4144.810 | 53.566   | 2562.464 | 122.398  |
| <a href="#">AMK58_25665</a> | <a href="#">no KO assigned   (GenBank) hypothetical protein</a>                                                          | Hypothetical                        | 244.596  | 204.585  | 354.078  | 1508.001 | 836.492  | 1166.357 |
| <a href="#">AMK58_25670</a> | <a href="#">no KO assigned   (GenBank) hypothetical protein</a>                                                          | Hypothetical                        | 2.089    | 3.285    | 3.450    | 71.444   | 4.944    | 66.179   |
| <a href="#">AMK58_25675</a> | <a href="#">no KO assigned   (GenBank) hypothetical protein</a>                                                          | Hypothetical                        | 276.051  | 218.614  | 259.913  | 543.503  | 179.643  | 803.851  |
| <a href="#">AMK58_25680</a> | <a href="#">no KO assigned   (GenBank) chromosome partitioning protein</a>                                               | Cell Cycle/Shape/Homeostasis        | 54.206   | 49.496   | 54.127   | 122.392  | 29.001   | 110.953  |
| <a href="#">AMK58_25685</a> | <a href="#">K03497 chromosome partitioning protein, ParB family   (GenBank) chromosome partitioning protein</a>          | Cell Cycle/Shape/Homeostasis        | 36.266   | 46.369   | 44.142   | 383.537  | 63.447   | 350.679  |
| <a href="#">AMK58_25690</a> | <a href="#">K03852 sulfoacetaldehyde acetyltransferase [EC:2.3.3.15]   (GenBank) sulfoacetaldehyde acetyltransferase</a> | Metabolism: amino acids             | 2.045    | 2.444    | 3.047    | 67.943   | 10.192   | 41.343   |
| <a href="#">AMK58_25695</a> | <a href="#">no KO assigned   (GenBank) hypothetical protein</a>                                                          | Hypothetical                        | 9.843    | 21.563   | 11.855   | 450.956  | 71.550   | 162.167  |
| <a href="#">AMK58_25700</a> | <a href="#">no KO assigned   (GenBank) DMSO reductase</a>                                                                | Energy                              | 2.819    | 5.358    | 4.020    | 126.145  | 15.265   | 115.715  |
| <a href="#">AMK58_25705</a> | <a href="#">no KO assigned   (GenBank) ferredoxin</a>                                                                    | Energy                              | 33.792   | 26.791   | 40.962   | 738.418  | 79.028   | 498.679  |
| <a href="#">AMK58_25710</a> | <a href="#">no KO assigned   (GenBank) formate dehydrogenase</a>                                                         | Energy                              | 15.034   | 14.422   | 17.475   | 45.836   | 6.093    | 38.405   |
| <a href="#">AMK58_25715</a> | <a href="#">K01902 succinyl-CoA synthetase alpha subunit [EC:6.2.1.5]   (GenBank) succinyl-CoA synthetase subuni</a>     | Metabolism: Carbon                  | 42.889   | 50.134   | 54.710   | 175.746  | 17.218   | 129.561  |
| <a href="#">AMK58_25720</a> | <a href="#">K01903 succinyl-CoA synthetase beta subunit [EC:6.2.1.5]   (GenBank) succinate-CoA ligase</a>                | Metabolism: Carbon                  | 63.712   | 55.297   | 68.764   | 257.047  | 18.872   | 218.651  |
| <a href="#">AMK58_25725</a> | <a href="#">K15515 sulfoacetaldehyde dehydrogenase [EC:1.2.1.81]   (GenBank) sulfoacetaldehyde dehydrogenase</a>         | dehydrogenase                       | 65.625   | 55.214   | 64.573   | 194.896  | 20.204   | 251.506  |
| <a href="#">AMK58_25730</a> | <a href="#">no KO assigned   (GenBank) hypothetical protein</a>                                                          | Hypothetical                        | 20.454   | 25.851   | 24.909   | 76.298   | 5.306    | 82.287   |
| <a href="#">AMK58_25735</a> | <a href="#">K07794 putative tricarboxylic transport membrane protein   (GenBank) hypothetical protein</a>                | Signal transduction                 | 154.218  | 145.479  | 172.142  | 449.409  | 25.850   | 426.499  |
| <a href="#">AMK58_25740</a> | <a href="#">no KO assigned   (GenBank) hypothetical protein</a>                                                          | Hypothetical                        | 13.086   | 16.075   | 15.000   | 160.548  | 20.895   | 55.795   |
| <a href="#">AMK58_25745</a> | <a href="#">K00625 phosphate acetyltransferase [EC:2.3.1.8]   (GenBank) phosphate acetyltransferase</a>                  | Metabolism                          | 23.270   | 34.756   | 33.994   | 189.947  | 18.800   | 85.298   |
| <a href="#">AMK58_25750</a> | <a href="#">no KO assigned   (GenBank) hypothetical protein</a>                                                          | Hypothetical                        | 11.927   | 12.429   | 14.110   | 250.246  | 25.099   | 167.054  |
| <a href="#">AMK58_25755</a> | <a href="#">no KO assigned   (GenBank) hypothetical protein</a>                                                          | Hypothetical                        | 168.484  | 247.393  | 183.591  | 70.743   | 5.228    | 205.758  |
| <a href="#">AMK58_25760</a> | <a href="#">K05800 Lrp/AsnC family transcriptional regulator   (GenBank) ArsR family transcriptional regulator</a>       | Transcription                       | 33.462   | 70.199   | 38.859   | 224.460  | 10.336   | 94.979   |
| <a href="#">AMK58_25765</a> | <a href="#">no KO assigned   (GenBank) reactive intermediate/imine deaminase</a>                                         | No COG                              | 107.622  | 181.796  | 151.665  | 662.044  | 54.005   | 616.592  |
| <a href="#">AMK58_25770</a> | <a href="#">K01738 cysteine synthase A [EC:2.5.1.47]   (GenBank) cysteine synthase</a>                                   | Metabolism                          | 43.827   | 64.047   | 44.369   | 81.656   | 6.261    | 112.952  |
| <a href="#">AMK58_25775</a> | <a href="#">no KO assigned   (GenBank) hypothetical protein</a>                                                          | Hypothetical                        | 146.116  | 267.264  | 183.312  | 390.484  | 39.352   | 396.776  |
| <a href="#">AMK58_25780</a> | <a href="#">K01999 branched-chain amino acid transport system substrate-binding protein   (GenBank) amino acid A</a>     | Transport: Amino Acid               | 24.933   | 36.610   | 36.263   | 145.769  | 9.382    | 133.528  |
| <a href="#">AMK58_25785</a> | <a href="#">K01997 branched-chain amino acid transport system permease protein   (GenBank) branched-chain amino</a>      | Transport: Amino Acid               | 27.697   | 56.734   | 45.897   | 255.293  | 17.345   | 212.799  |
| <a href="#">AMK58_25790</a> | <a href="#">K01998 branched-chain amino acid transport system permease protein   (GenBank) branched-chain amino</a>      | Transport: Amino Acid               | 11.563   | 16.932   | 19.402   | 145.329  | 8.410    | 91.351   |



|                             |                                                                                                                       |                                     |          |          |          |         |          |          |
|-----------------------------|-----------------------------------------------------------------------------------------------------------------------|-------------------------------------|----------|----------|----------|---------|----------|----------|
| <a href="#">AMK58_25795</a> | <a href="#">K01995 branched-chain amino acid transport system ATP-binding protein</a>   (GenBank) ABC transporter A   | Transport: Amino Acid               | 11.351   | 27.314   | 22.334   | 203.577 | 7.974    | 134.636  |
| <a href="#">AMK58_25800</a> | <a href="#">K01996 branched-chain amino acid transport system ATP-binding protein</a>   (GenBank) livF: ABC transport | Transport: Amino Acid               | 27.015   | 19.683   | 23.024   | 86.499  | 9.628    | 71.639   |
| <a href="#">AMK58_25805</a> | <a href="#">no KO assigned</a>   (GenBank) 2-amino-thiazoline-4-carboxylic acid hydrolase                             | hydrolase                           | 77.595   | 101.243  | 89.890   | 310.931 | 31.329   | 221.438  |
| <a href="#">AMK58_25810</a> | <a href="#">K01451 hippurate hydrolase</a> [EC:3.5.1.32]   (GenBank) peptidase M20                                    | Metabolism: Amino Acid              | 11.300   | 16.276   | 16.596   | 231.791 | 15.764   | 55.386   |
| <a href="#">AMK58_25815</a> | <a href="#">no KO assigned</a>   (GenBank) FAD-dependent oxidoreductase                                               | Oxidoreductase                      | 1.484    | 2.771    | 5.293    | 166.287 | 12.201   | 52.909   |
| <a href="#">AMK58_25820</a> | <a href="#">no KO assigned</a>   (GenBank) MFS transporter                                                            | Transport: MFS                      | 0.613    | 0.610    | 3.400    | 195.992 | 9.762    | 105.732  |
| <a href="#">AMK58_25825</a> | <a href="#">no KO assigned</a>   (GenBank) serine hydrolase                                                           | hydrolase                           | 5.881    | 9.087    | 9.063    | 181.067 | 26.444   | 128.537  |
| <a href="#">AMK58_25830</a> | <a href="#">no KO assigned</a>   (GenBank) LysR family transcriptional regulator                                      | Transcription                       | 25.840   | 27.056   | 32.927   | 414.475 | 77.254   | 148.211  |
| <a href="#">AMK58_25835</a> | <a href="#">no KO assigned</a>   (GenBank) hypothetical protein                                                       | Hypothetical                        | 36.933   | 39.902   | 39.458   | 98.642  | 28.040   | 98.507   |
| <a href="#">AMK58_25840</a> | <a href="#">no KO assigned</a>   (GenBank) hypothetical protein                                                       | Hypothetical                        | 93.226   | 94.238   | 101.880  | 54.791  | 29.713   | 77.267   |
| <a href="#">AMK58_25845</a> | <a href="#">no KO assigned</a>   (GenBank) hypothetical protein                                                       | Hypothetical                        | 40.358   | 44.652   | 49.743   | 478.548 | 39.204   | 338.195  |
| <a href="#">AMK58_25850</a> | <a href="#">no KO assigned</a>   (GenBank) hypothetical protein                                                       | Hypothetical                        | 20.179   | 21.469   | 26.546   | 90.720  | 18.954   | 147.899  |
| <a href="#">AMK58_25855</a> | <a href="#">no KO assigned</a>   (GenBank) hypothetical protein                                                       | Hypothetical                        | 3805.121 | 4682.018 | 5060.079 | 703.612 | 5757.893 | 1126.048 |
| <a href="#">AMK58_25860</a> | <a href="#">K07684 two-component system, NarL family, nitrate/nitrite response regulator NarL</a>   (GenBank) two-co  | Nitrogen                            | 181.701  | 248.554  | 273.851  | 383.197 | 695.254  | 397.313  |
| <a href="#">AMK58_25865</a> | <a href="#">no KO assigned</a>   (GenBank) hypothetical protein                                                       | Hypothetical                        | 1.207    | 3.155    | 2.080    | 50.929  | 36.122   | 89.256   |
| <a href="#">AMK58_25870</a> | <a href="#">no KO assigned</a>   (GenBank) hypothetical protein                                                       | Hypothetical                        | 45.244   | 41.878   | 55.338   | 611.754 | 92.161   | 333.855  |
| <a href="#">AMK58_25875</a> | <a href="#">K02769 PTS system, fructose-specific IIB component</a> [EC:2.7.1.202] K02770 PTS system, fructose-speci   | Metabolism: Carbohydrate            | 2.257    | 2.374    | 2.086    | 55.371  | 7.692    | 9.841    |
| <a href="#">AMK58_25880</a> | <a href="#">K00882 1-phosphofructokinase</a> [EC:2.7.1.56]   (GenBank) 1-phosphofructokinase                          | Metabolism: Carbohydrate            | 23.259   | 24.037   | 31.320   | 431.148 | 69.672   | 214.630  |
| <a href="#">AMK58_25885</a> | <a href="#">K02768 PTS system, fructose-specific IIA component</a> [EC:2.7.1.202] K08483 phosphotransferase system    | Metabolism                          | 10.578   | 14.518   | 14.769   | 77.614  | 18.692   | 56.996   |
| <a href="#">AMK58_25890</a> | <a href="#">K03435 LacI family transcriptional regulator, fructose operon transcriptional repressor</a>   (GenBank)   | Transcription                       | 21.179   | 26.010   | 26.179   | 87.004  | 61.500   | 77.029   |
| <a href="#">AMK58_25895</a> | <a href="#">no KO assigned</a>   (GenBank) TetR family transcriptional regulator                                      | Transcription                       | 13.136   | 11.347   | 17.907   | 164.518 | 42.874   | 154.976  |
| <a href="#">AMK58_25900</a> | <a href="#">K13995 maleamate amidohydrolase</a> [EC:3.5.1.107]   (GenBank) N-carbamoylsarcosine amidase               | Metabolism: Co-Factors and Vitamins | 8.859    | 11.762   | 11.793   | 309.076 | 104.449  | 331.332  |
| <a href="#">AMK58_25905</a> | <a href="#">K18028 2,5-dihydroxypyridine 5,6-dioxygenase</a> [EC:1.13.11.9]   (GenBank) 2,5-dihydroxypyridine 5,6-di  | Metabolism: Co-Factors and Vitamins | 0.922    | 3.445    | 3.179    | 127.895 | 33.570   | 108.634  |
| <a href="#">AMK58_25910</a> | <a href="#">K15357 N-formylmaleamate deformylase</a> [EC:3.5.1.106]   (GenBank) alpha/beta hydrolase                  | Metabolism: Co-Factors and Vitamins | 1.794    | 3.572    | 4.406    | 166.591 | 36.640   | 139.436  |
| <a href="#">AMK58_25915</a> | <a href="#">K01799 maleate isomerase</a> [EC:5.2.1.11]   (GenBank) Asp/Glu racemase                                   | Metabolism: Carbohydrate            | 2.883    | 4.784    | 8.984    | 335.956 | 51.125   | 247.558  |
| <a href="#">AMK58_25920</a> | <a href="#">K00480 salicylate hydroxylase</a> [EC:1.14.13.11]   (GenBank) salicylate 1-monoxygenase                   | Metabolism                          | 0.899    | 0.000    | 1.900    | 116.688 | 6.400    | 90.409   |
| <a href="#">AMK58_25925</a> | <a href="#">K01996 branched-chain amino acid transport system ATP-binding protein</a>   (GenBank) ABC transporter A   | Transport: Amino Acid               | 1.741    | 4.728    | 6.922    | 218.580 | 25.795   | 114.178  |
| <a href="#">AMK58_25930</a> | <a href="#">K01995 branched-chain amino acid transport system ATP-binding protein</a>   (GenBank) ABC transporter A   | Transport: Amino Acid               | 4.914    | 2.669    | 7.929    | 153.807 | 29.964   | 214.320  |
| <a href="#">AMK58_25935</a> | <a href="#">K01998 branched-chain amino acid transport system permease protein</a>   (GenBank) branched-chain amino   | Transport: Amino Acid               | 4.858    | 5.209    | 8.527    | 124.810 | 25.062   | 149.577  |
| <a href="#">AMK58_25940</a> | <a href="#">K01997 branched-chain amino acid transport system permease protein</a>   (GenBank) branched-chain amino   | Transport: Amino Acid               | 13.314   | 13.257   | 18.461   | 268.080 | 56.900   | 242.158  |
| <a href="#">AMK58_25945</a> | <a href="#">K01999 branched-chain amino acid transport system substrate-binding protein</a>   (GenBank) branched-cha  | Transport: Amino Acid               | 0.958    | 0.000    | 1.417    | 45.646  | 2.155    | 22.118   |
| <a href="#">AMK58_25950</a> | <a href="#">no KO assigned</a>   (GenBank) hypothetical protein                                                       | Hypothetical                        | 0.310    | 0.000    | 2.066    | 193.375 | 6.630    | 115.148  |
| <a href="#">AMK58_25955</a> | <a href="#">no KO assigned</a>   (GenBank) hypothetical protein                                                       | Hypothetical                        | 4.340    | 20.741   | 19.805   | 944.631 | 66.339   | 1190.300 |
| <a href="#">AMK58_25960</a> | <a href="#">K01465 dihydroorotase</a> [EC:3.5.2.3]   (GenBank) dihydroorotase                                         | Metabolism: Nucleotides             | 0.666    | 1.137    | 1.629    | 126.740 | 2.140    | 52.693   |
| <a href="#">AMK58_25965</a> | <a href="#">no KO assigned</a>   (GenBank) hypothetical protein                                                       | Hypothetical                        | 1.316    | 1.747    | 2.920    | 282.454 | 7.561    | 119.998  |
| <a href="#">AMK58_25970</a> | <a href="#">K00681 gamma-glutamyltranspeptidase / glutathione hydrolase</a> [EC:2.3.2.2 3.4.19.13]   (GenBank) gamma  | Metabolism: amino acids             | 3.350    | 3.185    | 5.068    | 100.270 | 10.186   | 161.344  |
| <a href="#">AMK58_25975</a> | <a href="#">K01999 branched-chain amino acid transport system substrate-binding protein</a>   (GenBank) ABC transport | Transport: Amino Acid               | 1.902    | 2.525    | 5.826    | 160.771 | 8.788    | 162.233  |
| <a href="#">AMK58_25980</a> | <a href="#">K01997 branched-chain amino acid transport system permease protein</a>   (GenBank) ABC transporter perme  | Transport: Amino Acid               | 3.745    | 1.657    | 5.407    | 172.775 | 16.369   | 192.003  |
| <a href="#">AMK58_25985</a> | <a href="#">K01998 branched-chain amino acid transport system permease protein</a>   (GenBank) ABC transporter perme  | Transport: Amino Acid               | 2.216    | 2.091    | 4.880    | 143.905 | 14.422   | 87.393   |
| <a href="#">AMK58_25990</a> | <a href="#">K01995 branched-chain amino acid transport system ATP-binding protein</a>   (GenBank) ABC transporter A   | Transport: Amino Acid               | 3.104    | 4.416    | 4.217    | 166.741 | 18.113   | 141.879  |
| <a href="#">AMK58_25995</a> | <a href="#">K01996 branched-chain amino acid transport system ATP-binding protein</a>   (GenBank) ABC transporter A   | Transport: Amino Acid               | 8.415    | 15.391   | 16.492   | 626.429 | 63.896   | 499.879  |
| <a href="#">AMK58_26000</a> | <a href="#">K03520 carbon-monoxide dehydrogenase large subunit</a> [EC:1.2.7.4]   (GenBank) carbon monoxide dehydr    | Metabolism                          | 0.766    | 1.831    | 2.137    | 56.320  | 4.307    | 26.149   |
| <a href="#">AMK58_26005</a> | <a href="#">K03519 carbon-monoxide dehydrogenase medium subunit</a> [EC:1.2.7.4]   (GenBank) carbon monoxide dehydr   | Metabolism                          | 0.149    | 0.000    | 1.982    | 109.520 | 4.185    | 54.547   |
| <a href="#">AMK58_26010</a> | <a href="#">K03518 carbon-monoxide dehydrogenase small subunit</a> [EC:1.2.7.4]   (GenBank) (2Fe-2S)-binding protein  | Metabolism                          | 5.447    | 5.917    | 8.946    | 394.354 | 35.345   | 255.534  |
| <a href="#">AMK58_26015</a> | <a href="#">no KO assigned</a>   (GenBank) hypothetical protein                                                       | Hypothetical                        | 5.605    | 4.465    | 8.527    | 273.814 | 22.262   | 86.801   |
| <a href="#">AMK58_26020</a> | <a href="#">K01426 amidase</a> [EC:3.5.1.4]   (GenBank) amidase                                                       | Metabolism: Amino Acid              | 2.151    | 2.448    | 2.824    | 95.500  | 6.102    | 56.325   |
| <a href="#">AMK58_26025</a> | <a href="#">no KO assigned</a>   (GenBank) hypothetical protein                                                       | Hypothetical                        | 37.498   | 36.073   | 35.351   | 372.474 | 56.438   | 285.536  |
| <a href="#">AMK58_26030</a> | <a href="#">no KO assigned</a>   (GenBank) MarR family transcriptional regulator                                      | Transcription                       | 12.955   | 22.326   | 19.186   | 350.068 | 39.204   | 115.504  |
| <a href="#">AMK58_26035</a> | <a href="#">no KO assigned</a>   (GenBank) hypothetical protein                                                       | Hypothetical                        | 7.164    | 11.453   | 6.811    | 166.376 | 9.753    | 46.592   |
| <a href="#">AMK58_26040</a> | <a href="#">K03522 electron transfer flavoprotein alpha subunit</a>   (GenBank) electron transfer flavoprotein subun  | energy                              | 3.844    | 6.889    | 4.873    | 72.769  | 4.176    | 25.186   |
| <a href="#">AMK58_26045</a> | <a href="#">K03521 electron transfer flavoprotein beta subunit</a>   (GenBank) electron transfer flavoprotein subuni  | energy                              | 28.646   | 28.367   | 24.830   | 300.203 | 23.400   | 286.324  |
| <a href="#">AMK58_26050</a> | <a href="#">no KO assigned</a>   (GenBank) hydroxylase dehydrogenase                                                  | dehydrogenase                       | 14.913   | 15.101   | 14.740   | 157.333 | 45.910   | 145.474  |
| <a href="#">AMK58_26055</a> | <a href="#">K00128 aldehyde dehydrogenase (NAD+)</a> [EC:1.2.1.3]   (GenBank) aldehyde dehydrogenase                  | Energy                              | 8.488    | 10.937   | 9.732    | 144.462 | 9.260    | 70.217   |
| <a href="#">AMK58_26060</a> | <a href="#">K00077 2-dehydropanoate 2-reductase</a> [EC:1.1.1.169]   (GenBank) hypothetical protein                   | Metabolism: Co-Factors and Vitamins | 46.264   | 31.610   | 43.404   | 304.099 | 39.279   | 258.882  |
| <a href="#">AMK58_26065</a> | <a href="#">no KO assigned</a>   (GenBank) C4-dicarboxylate ABC transporter                                           | Membrane Transport                  | 17.509   | 10.501   | 15.426   | 109.301 | 8.815    | 78.420   |
| <a href="#">AMK58_26070</a> | <a href="#">no KO assigned</a>   (GenBank) C4-dicarboxylate ABC transporter                                           | Membrane Transport                  | 264.181  | 258.591  | 243.585  | 316.276 | 100.591  | 485.598  |
| <a href="#">AMK58_26075</a> | <a href="#">no KO assigned</a>   (GenBank) ABC transporter substrate-binding protein                                  | Membrane Transport                  | 8.250    | 5.995    | 10.388   | 420.100 | 34.963   | 192.802  |
| <a href="#">AMK58_26080</a> | <a href="#">K00164 2-oxoglutarate dehydrogenase E1 component</a> [EC:1.2.4.2]   (GenBank) hypothetical protein        | Metabolism                          | 6.017    | 7.466    | 6.865    | 97.832  | 18.520   | 71.756   |
| <a href="#">AMK58_26085</a> | <a href="#">K14448 (2S)-methylsuccinyl-CoA dehydrogenase</a> [EC:1.3.8.12]   (GenBank) acyl-CoA dehydrogenase         | Metabolism: Carbon                  | 26.380   | 31.692   | 31.830   | 100.538 | 32.472   | 117.321  |
| <a href="#">AMK58_26090</a> | <a href="#">K19338 LysR family transcriptional regulator, nitrogen assimilation regulatory protein</a>   (GenBank) h  | Nitrogen                            | 124.228  | 110.010  | 127.950  | 132.283 | 72.583   | 162.206  |
| <a href="#">AMK58_26095</a> | <a href="#">K00059 3-oxoacyl-[acyl-carrier protein] reductase</a> [EC:1.1.1.100]   (GenBank) fabG: 3-ketoacyl-ACP re  | Metabolism: Lipid                   | 115.447  | 112.394  | 133.770  | 312.095 | 113.863  | 242.878  |
| <a href="#">AMK58_26100</a> | <a href="#">K14470 2-methylfumaryl-CoA isomerase</a> [EC:5.4.1.3]   (GenBank) mesaconyl-CoA isomerase                 | Metabolism: Carbon                  | 10.742   | 13.196   | 12.314   | 94.272  | 81.363   | 111.897  |
| <a href="#">AMK58_26105</a> | <a href="#">K02164 nitric oxide reductase NorE protein</a>   (GenBank) copper oxidase                                 | Nitrogen                            | 15.059   | 16.794   | 16.800   | 51.103  | 48.524   | 78.756   |
| <a href="#">AMK58_26110</a> | <a href="#">no KO assigned</a>   (GenBank) hypothetical protein                                                       | Hypothetical                        | 721.623  | 712.872  | 665.271  | 722.197 | 366.367  | 743.990  |
| <a href="#">AMK58_26115</a> | <a href="#">K08289 phosphoribosylsarcosine formyltransferase 2</a> [EC:2.1.2.2]   (GenBank) purT: phosphoribosyl      | Metabolism                          | 0.517    | 1.237    | 1.476    | 146.522 | 35.128   | 70.624   |
| <a href="#">AMK58_26120</a> | <a href="#">no KO assigned</a>   (GenBank) hypothetical protein                                                       | Hypothetical                        | 89.955   | 113.297  | 95.701   | 467.343 | 347.065  | 310.432  |
| <a href="#">AMK58_26125</a> | <a href="#">K02016 iron complex transport system substrate-binding protein</a>   (GenBank) ABC transporter substrate  | Transport: Metal                    | 16.073   | 28.738   | 33.019   | 213.262 | 142.423  | 51.022   |

|                             |                                                                                                                       |                              |          |          |          |          |          |          |
|-----------------------------|-----------------------------------------------------------------------------------------------------------------------|------------------------------|----------|----------|----------|----------|----------|----------|
| <a href="#">AMK58_26130</a> | <a href="#">K02015 iron complex transport system permease protein   (GenBank) iron ABC transporter permease</a>       | Transport: Metal             | 5.835    | 5.810    | 7.397    | 173.910  | 116.690  | 26.827   |
| <a href="#">AMK58_26135</a> | <a href="#">K02013 iron complex transport system ATP-binding protein [EC:3.6.3.34]   (GenBank) ABC transporter</a>    | Transport: Metal             | 25.641   | 25.381   | 34.766   | 256.083  | 317.380  | 94.121   |
| <a href="#">AMK58_26140</a> | <a href="#">K17247 methionine sulfoxide reductase heme-binding subunit 1   (GenBank) sulfite oxidase</a>              | No COG                       | 151.484  | 135.699  | 161.523  | 158.163  | 1348.905 | 254.130  |
| <a href="#">AMK58_26145</a> | <a href="#">K07147 methionine sulfoxide reductase catalytic subunit [EC:1.8.-.-1]   (GenBank) sulfoxide reductase</a> | Oxidoreductase               | 19.413   | 20.602   | 29.387   | 173.991  | 370.237  | 77.926   |
| <a href="#">AMK58_26150</a> | <a href="#">no KO assigned   (GenBank) oxidoreductase</a>                                                             | Oxidoreductase               | 28.121   | 30.228   | 39.380   | 90.629   | 424.151  | 37.423   |
| <a href="#">AMK58_26155</a> | <a href="#">K01625 2-dehydro-3-deoxyphosphogluconate aldolase / (4S)-4-hydroxy-2-oxoglutarate aldolase [EC:4.1.2</a>  | Metabolism: Carbon           | 26.271   | 35.258   | 36.020   | 358.033  | 1325.197 | 206.534  |
| <a href="#">AMK58_26160</a> | <a href="#">no KO assigned   (GenBank) GntR family transcriptional regulator</a>                                      | Transcription                | 69.276   | 75.943   | 85.508   | 177.298  | 2625.241 | 181.665  |
| <a href="#">AMK58_26165</a> | <a href="#">K00874 2-dehydro-3-deoxygluconokinase [EC:2.7.1.45]   (GenBank) ketodeoxygluconokinase</a>                | Metabolism: Carbohydrate     | 123.021  | 119.396  | 120.301  | 182.698  | 85.332   | 261.000  |
| <a href="#">AMK58_26170</a> | <a href="#">no KO assigned   (GenBank) multidrug DMT transporter permease</a>                                         | defense                      | 10.121   | 14.361   | 12.991   | 162.016  | 22.184   | 82.706   |
| <a href="#">AMK58_26175</a> | <a href="#">no KO assigned   (GenBank) hypothetical protein</a>                                                       | Hypothetical                 | 41.380   | 30.521   | 41.287   | 270.652  | 37.325   | 131.218  |
| <a href="#">AMK58_26180</a> | <a href="#">K13584 two-component system, cell cycle response regulator CtrA   (GenBank) two-component system re</a>   | Cell Cycle/Shape/Homeostasis | 373.428  | 146.491  | 180.570  | 113.632  | 169.988  | 353.755  |
| <a href="#">AMK58_26185</a> | <a href="#">K02406 flagellin   (GenBank) flagellin</a>                                                                | Motility                     | 5.154    | 2.905    | 2.681    | 47.809   | 2.405    | 34.988   |
| <a href="#">AMK58_26190</a> | <a href="#">K06602 flagellar protein FlaF   (GenBank) flagellar basal body protein Flil</a>                           | Motility                     | 13.247   | 0.000    | 8.202    | 60.252   | 15.929   | 82.845   |
| <a href="#">AMK58_26195</a> | <a href="#">K06601 flagellar protein FlbT   (GenBank) flagellar protein</a>                                           | Motility                     | 4.423    | 8.257    | 4.731    | 119.973  | 8.079    | 83.561   |
| <a href="#">AMK58_26200</a> | <a href="#">no KO assigned   (GenBank) hypothetical protein</a>                                                       | Hypothetical                 | 26.495   | 11.044   | 15.232   | 263.294  | 55.753   | 385.374  |
| <a href="#">AMK58_26205</a> | <a href="#">no KO assigned   (GenBank) flagellar biosynthesis protein FlgG</a>                                        | Motility                     | 8.072    | 14.558   | 15.639   | 238.077  | 39.202   | 247.699  |
| <a href="#">AMK58_26210</a> | <a href="#">no KO assigned   (GenBank) hypothetical protein</a>                                                       | Hypothetical                 | 13.921   | 13.978   | 17.240   | 191.802  | 21.959   | 112.812  |
| <a href="#">AMK58_26215</a> | <a href="#">no KO assigned   (GenBank) MFS transporter</a>                                                            | Transport: MFS               | 3.081    | 2.454    | 5.370    | 114.177  | 24.241   | 34.090   |
| <a href="#">AMK58_26220</a> | <a href="#">no KO assigned   (GenBank) LysR family transcriptional regulator</a>                                      | Transcription                | 0.555    | 1.657    | 3.297    | 146.209  | 17.148   | 28.807   |
| <a href="#">AMK58_26225</a> | <a href="#">no KO assigned   (GenBank) hypothetical protein</a>                                                       | Hypothetical                 | 2.198    | 1.194    | 6.079    | 405.197  | 41.771   | 226.392  |
| <a href="#">AMK58_26230</a> | <a href="#">K02412 flagellum-specific ATP synthase [EC:3.6.3.14]   (GenBank) flagellar protein export ATPase Flj</a>  | Motility                     | 1.174    | 2.697    | 1.459    | 52.732   | 4.059    | 73.507   |
| <a href="#">AMK58_26235</a> | <a href="#">K02387 flagellar basal-body rod protein FlgB   (GenBank) flagellar biosynthesis protein FlgG</a>          | Motility                     | 7.086    | 5.522    | 3.515    | 72.220   | 17.315   | 149.693  |
| <a href="#">AMK58_26240</a> | <a href="#">K02388 flagellar basal-body rod protein FlgC   (GenBank) flagellar basal-body rod protein FlgC</a>        | Motility                     | 2.306    | 3.445    | 3.015    | 108.124  | 10.693   | 124.833  |
| <a href="#">AMK58_26245</a> | <a href="#">K02408 flagellar hook-basal body complex protein FlhE   (GenBank) flagellar basal body protein FlhE</a>   | Motility                     | 3.308    | 5.929    | 7.234    | 85.524   | 28.632   | 119.018  |
| <a href="#">AMK58_26250</a> | <a href="#">K02420 flagellar biosynthetic protein FljO   (GenBank) flagellar biosynthetic protein FljO</a>            | Motility                     | 9.069    | 13.546   | 20.264   | 635.987  | 68.301   | 309.898  |
| <a href="#">AMK58_26255</a> | <a href="#">no KO assigned   (GenBank) transglycosylase</a>                                                           | transglycosylase             | 17.745   | 9.382    | 16.872   | 447.431  | 39.010   | 429.275  |
| <a href="#">AMK58_26260</a> | <a href="#">K02400 flagellar biosynthesis protein FlhA   (GenBank) flhA, flagellar biosynthesis protein FlhA</a>      | Motility                     | 1.156    | 0.345    | 1.979    | 84.811   | 3.900    | 49.004   |
| <a href="#">AMK58_26265</a> | <a href="#">K02421 flagellar biosynthetic protein FljR   (GenBank) flagellar biosynthesis protein</a>                 | Motility                     | 2.393    | 7.624    | 5.309    | 238.471  | 15.420   | 192.737  |
| <a href="#">AMK58_26270</a> | <a href="#">K02401 flagellar biosynthetic protein FlhB   (GenBank) flagellar biosynthetic protein FlhB</a>            | Motility                     | 8.601    | 8.564    | 11.428   | 172.821  | 8.428    | 111.452  |
| <a href="#">AMK58_26275</a> | <a href="#">no KO assigned   (GenBank) hypothetical protein</a>                                                       | Hypothetical                 | 2.018    | 1.340    | 4.050    | 130.049  | 11.341   | 108.527  |
| <a href="#">AMK58_26280</a> | <a href="#">no KO assigned   (GenBank) AsnC family transcriptional regulator</a>                                      | Transcription                | 4252.293 | 4019.766 | 3646.238 | 359.531  | 653.184  | 473.417  |
| <a href="#">AMK58_26285</a> | <a href="#">no KO assigned   (GenBank) saccharopine dehydrogenase</a>                                                 | Oxidoreductase               | 327.052  | 326.408  | 323.313  | 355.429  | 305.486  | 291.523  |
| <a href="#">AMK58_26290</a> | <a href="#">K00156 pyruvate dehydrogenase (quinone) [EC:1.2.5.1]   (GenBank) pyruvate oxidase</a>                     | Metabolism: Carbohydrates    | 6.071    | 4.534    | 7.543    | 78.644   | 26.366   | 120.842  |
| <a href="#">AMK58_26295</a> | <a href="#">no KO assigned   (GenBank) ferredoxin</a>                                                                 | Ferredoxin                   | 27.036   | 28.872   | 26.079   | 44.264   | 34.794   | 118.810  |
| <a href="#">AMK58_26300</a> | <a href="#">no KO assigned   (GenBank) PAS sensor protein</a>                                                         | Signal transduction          | 22.169   | 23.772   | 25.402   | 63.961   | 454.602  | 174.993  |
| <a href="#">AMK58_26305</a> | <a href="#">no KO assigned   (GenBank) hypothetical protein</a>                                                       | Hypothetical                 | 259.830  | 360.530  | 358.148  | 629.663  | 897.351  | 816.539  |
| <a href="#">AMK58_26310</a> | <a href="#">K03797 carboxyl-terminal processing protease [EC:3.4.21.102]   (GenBank) hypothetical protein</a>         | Peptidases                   | 2.982    | 4.157    | 5.482    | 209.324  | 77.879   | 178.636  |
| <a href="#">AMK58_26315</a> | <a href="#">no KO assigned   (GenBank) LysR family transcriptional regulator</a>                                      | Transcription                | 25.271   | 24.788   | 21.398   | 174.480  | 85.500   | 155.172  |
| <a href="#">AMK58_26320</a> | <a href="#">no KO assigned   (GenBank) oxidoreductase</a>                                                             | Oxidoreductase               | 108.888  | 86.992   | 89.838   | 102.400  | 134.670  | 154.829  |
| <a href="#">AMK58_26325</a> | <a href="#">K07220 uncharacterized protein   (GenBank) nuclease PIN</a>                                               | No COG                       | 233.742  | 208.746  | 356.904  | 634.978  | 411.010  | 547.315  |
| <a href="#">AMK58_26330</a> | <a href="#">K07303 isoquinoline 1-oxidoreductase subunit beta [EC:1.3.99.16]   (GenBank) twin-arginine transloc</a>   | Oxidoreductase               | 27.162   | 35.806   | 35.341   | 23.569   | 45.673   | 46.295   |
| <a href="#">AMK58_26335</a> | <a href="#">K07302 isoquinoline 1-oxidoreductase subunit alpha [EC:1.3.99.16]   (GenBank) isoquinoline 1-oxidore</a>  | Oxidoreductase               | 32.181   | 34.671   | 46.900   | 328.259  | 156.255  | 345.859  |
| <a href="#">AMK58_26340</a> | <a href="#">no KO assigned   (GenBank) LysR family transcriptional regulator</a>                                      | Transcription                | 416.042  | 449.063  | 404.590  | 366.279  | 351.802  | 365.693  |
| <a href="#">AMK58_26345</a> | <a href="#">no KO assigned   (GenBank) hypothetical protein</a>                                                       | Hypothetical                 | 2.894    | 1.820    | 3.089    | 15.981   | 15.578   | 65.008   |
| <a href="#">AMK58_26350</a> | <a href="#">no KO assigned   (GenBank) acetyltransferase</a>                                                          | Acetyltransferase            | 36.110   | 28.201   | 31.192   | 293.705  | 46.956   | 236.576  |
| <a href="#">AMK58_26355</a> | <a href="#">no KO assigned   (GenBank) hypothetical protein</a>                                                       | Hypothetical                 | 2.537    | 3.610    | 3.332    | 131.594  | 20.781   | 96.023   |
| <a href="#">AMK58_26360</a> | <a href="#">no KO assigned   (GenBank) hypothetical protein</a>                                                       | Hypothetical                 | 3.210    | 2.740    | 2.834    | 78.943   | 13.403   | 89.305   |
| <a href="#">AMK58_26365</a> | <a href="#">no KO assigned   (GenBank) flagellar biosynthesis protein FlgJ</a>                                        | Motility                     | 15.827   | 9.456    | 23.701   | 919.583  | 101.403  | 477.696  |
| <a href="#">AMK58_26370</a> | <a href="#">K02394 flagellar P-ring protein precursor FlgI   (GenBank) flgI, flagellar biosynthesis protein FlgA</a>  | Motility                     | 5.537    | 6.998    | 6.480    | 231.939  | 21.665   | 109.801  |
| <a href="#">AMK58_26375</a> | <a href="#">K02397 flagellar hook-associated protein 3 FlaL   (GenBank) flagellar hook protein</a>                    | Motility                     | 7.390    | 4.754    | 10.593   | 241.680  | 18.018   | 214.630  |
| <a href="#">AMK58_26380</a> | <a href="#">K02396 flagellar hook-associated protein 1 FlgK   (GenBank) flagellar hook protein</a>                    | Motility                     | 9.613    | 8.796    | 8.152    | 158.125  | 23.072   | 206.711  |
| <a href="#">AMK58_26385</a> | <a href="#">K02390 flagellar hook protein FlgE   (GenBank) flagellar hook protein</a>                                 | Motility                     | 91.518   | 100.319  | 74.505   | 90.366   | 34.678   | 94.878   |
| <a href="#">AMK58_26390</a> | <a href="#">K03704 cold shock protein (beta-ribbon, CspA family)   (GenBank) DNA-binding protein</a>                  | Stress Response              | 190.910  | 208.024  | 238.138  | 124.290  | 90.951   | 111.352  |
| <a href="#">AMK58_26395</a> | <a href="#">no KO assigned   (GenBank) hypothetical protein</a>                                                       | Hypothetical                 | 334.824  | 290.235  | 362.411  | 620.711  | 302.429  | 598.772  |
| <a href="#">AMK58_26400</a> | <a href="#">no KO assigned   (GenBank) hypothetical protein</a>                                                       | Hypothetical                 | 31.776   | 24.250   | 31.095   | 26.254   | 19.554   | 46.026   |
| <a href="#">AMK58_26405</a> | <a href="#">no KO assigned   (GenBank) hypothetical protein</a>                                                       | Hypothetical                 | 3617.999 | 2797.684 | 3358.200 | 1446.952 | 923.299  | 1497.479 |
| <a href="#">AMK58_26410</a> | <a href="#">no KO assigned   (GenBank) hypothetical protein</a>                                                       | Hypothetical                 | 12.706   | 10.367   | 11.868   | 62.385   | 29.068   | 55.953   |
| <a href="#">AMK58_26415</a> | <a href="#">no KO assigned   (GenBank) hypothetical protein</a>                                                       | Hypothetical                 | 14.822   | 17.070   | 13.923   | 278.204  | 117.626  | 226.195  |
| <a href="#">AMK58_26420</a> | <a href="#">no KO assigned   (GenBank) hypothetical protein</a>                                                       | Hypothetical                 | 2.263    | 2.817    | 3.138    | 97.135   | 48.756   | 145.933  |
| <a href="#">AMK58_26425</a> | <a href="#">no KO assigned   (GenBank) C4-dicarboxylate ABC transporter permease</a>                                  | Membrane Transport           | 14.574   | 9.377    | 13.004   | 163.387  | 262.609  | 263.002  |
| <a href="#">AMK58_26430</a> | <a href="#">no KO assigned   (GenBank) C4-dicarboxylate ABC transporter</a>                                           | Membrane Transport           | 3.153    | 0.753    | 5.276    | 211.855  | 21.123   | 98.938   |
| <a href="#">AMK58_26435</a> | <a href="#">no KO assigned   (GenBank) GntR family transcriptional regulator</a>                                      | Transcription                | 2.562    | 5.741    | 9.441    | 434.212  | 49.145   | 225.876  |
| <a href="#">AMK58_26440</a> | <a href="#">no KO assigned   (GenBank) multidrug transporter</a>                                                      | Transport                    | 6.769    | 7.630    | 12.751   | 244.819  | 35.028   | 209.499  |
| <a href="#">AMK58_26445</a> | <a href="#">no KO assigned   (GenBank) formate transporter FocA</a>                                                   | Transport                    | 8.969    | 12.608   | 11.537   | 202.997  | 26.092   | 178.433  |
| <a href="#">AMK58_26450</a> | <a href="#">K04069 pyruvate formate lyase activating enzyme [EC:1.97.1.4]   (GenBank) pyruvate formate lyase-act</a>  | Oxidoreductase               | 23.439   | 26.894   | 29.222   | 481.151  | 173.606  | 338.104  |
| <a href="#">AMK58_26455</a> | <a href="#">K00873 pyruvate kinase [EC:2.7.1.40]   (GenBank) pyruvate kinase</a>                                      | Metabolism                   | 123.140  | 143.817  | 147.524  | 301.598  | 318.712  | 404.289  |
| <a href="#">AMK58_26460</a> | <a href="#">no KO assigned   (GenBank) two-component system sensor histidine kinase/response regulator</a>            | Signal Transduction          | 8.043    | 13.364   | 11.811   | 65.920   | 50.393   | 124.273  |

|             |                                                                                                       |                                |          |          |          |         |          |          |
|-------------|-------------------------------------------------------------------------------------------------------|--------------------------------|----------|----------|----------|---------|----------|----------|
| AMK58_26465 | no KO assigned   (GenBank) hypothetical protein.                                                      | Hypothetical                   | 25.251   | 31.590   | 28.728   | 131.252 | 166.538  | 115.572  |
| AMK58_26470 | no KO assigned   (GenBank) TetR family transcriptional regulator.                                     | Transcription                  | 121.611  | 113.091  | 112.912  | 193.283 | 285.234  | 214.935  |
| AMK58_26475 | no KO assigned   (GenBank) TetR family transcriptional regulator.                                     | Transcription                  | 68.796   | 41.712   | 63.307   | 341.936 | 311.426  | 250.278  |
| AMK58_26480 | K03585 membrane fusion protein, multidrug efflux system   (GenBank) hemolysin D.                      | defense                        | 88.073   | 79.966   | 97.147   | 495.864 | 387.033  | 509.714  |
| AMK58_26485 | K18138 multidrug efflux pump   (GenBank) multidrug transporter.                                       | Defense                        | 3.302    | 4.359    | 4.710    | 50.616  | 8.719    | 60.354   |
| AMK58_26490 | K19337 RpiR family transcriptional regulator, carbohydrate utilization regulator   (GenBank) transcr. | Transcription                  | 11.428   | 10.371   | 12.378   | 284.649 | 45.852   | 546.191  |
| AMK58_26495 | K00656 formate C-acetyltransferase [EC:2.3.1.54]   (GenBank) formate acetyltransferase.               | Metabolism: Carbohydrate       | 2.227    | 2.852    | 3.328    | 60.882  | 12.638   | 86.452   |
| AMK58_26500 | K01689 enolase [EC:4.2.1.11]   (GenBank) eno_ enolase.                                                | Metabolism                     | 12.695   | 11.320   | 9.638    | 228.558 | 103.082  | 141.611  |
| AMK58_26505 | no KO assigned   (GenBank) enoyl-CoA hydratase.                                                       | hydratase                      | 4.963    | 2.917    | 6.344    | 148.343 | 58.260   | 58.097   |
| AMK58_26510 | K00925 acetate kinase [EC:2.7.2.11]   (GenBank) acetate kinase.                                       | Metabolism                     | 8.151    | 7.127    | 10.680   | 131.426 | 23.017   | 96.784   |
| AMK58_26515 | no KO assigned   (GenBank) alpha/beta hydrolase.                                                      | hydrolase                      | 56.104   | 50.233   | 60.176   | 266.214 | 77.841   | 160.892  |
| AMK58_26520 | K00065 2-deoxy-D-gluconate 3-dehydrogenase [EC:1.1.1.125]   (GenBank) 2-deoxy-D-gluconate 3-dehyd     | Metabolism: Carbohydrate       | 90.054   | 62.407   | 81.561   | 198.863 | 81.834   | 191.372  |
| AMK58_26525 | K01815 4-deoxy-L-threo-5-hexosulose-uronate ketol-isomerase [EC:5.3.1.17]   (GenBank) 5-keto-4-deoxy  | Metabolism: Carbohydrate       | 10.927   | 11.316   | 13.022   | 221.908 | 69.439   | 117.404  |
| AMK58_26530 | no KO assigned   (GenBank) GntR family transcriptional regulator.                                     | Transcription                  | 4.020    | 2.882    | 4.739    | 242.956 | 74.101   | 285.371  |
| AMK58_26535 | K02526 2-keto-3-deoxygluconate permease   (GenBank) 2-keto-3-deoxygluconate permease                  | Transport                      | 8.072    | 6.290    | 7.230    | 111.415 | 23.405   | 84.067   |
| AMK58_26540 | K13584 two-component system, cell cycle response regulator CtrA   (GenBank) two-component system res  | Signal Transduction            | 81.493   | 137.252  | 103.902  | 226.021 | 50.599   | 123.353  |
| AMK58_26545 | no KO assigned   (GenBank) hypothetical protein.                                                      | Hypothetical                   | 43.167   | 41.511   | 49.337   | 31.289  | 44.201   | 30.980   |
| AMK58_26550 | no KO assigned   (GenBank) hypothetical protein.                                                      | Hypothetical                   | 526.602  | 572.293  | 585.766  | 767.289 | 573.340  | 295.328  |
| AMK58_26555 | no KO assigned   (GenBank) hypothetical protein.                                                      | Hypothetical                   | 220.023  | 251.694  | 247.573  | 300.186 | 383.608  | 163.973  |
| AMK58_26560 | no KO assigned   (GenBank) hypothetical protein.                                                      | Hypothetical                   | 411.074  | 423.762  | 440.140  | 116.703 | 274.088  | 80.001   |
| AMK58_26565 | K05595 multiple antibiotic resistance protein   (GenBank) hypothetical protein.                       | Defense                        | 2614.561 | 2537.175 | 2757.323 | 337.035 | 1125.323 | 179.025  |
| AMK58_26570 | K00263 leucine dehydrogenase [EC:1.4.1.91]   (GenBank) amino acid dehydrogenase.                      | Metabolism: Amino Acid         | 67.912   | 46.448   | 65.984   | 113.484 | 566.348  | 64.033   |
| AMK58_26575 | K09945 uncharacterized protein   (GenBank) hypothetical protein.                                      | Hypothetical                   | 4.748    | 3.546    | 11.098   | 365.978 | 43.585   | 342.129  |
| AMK58_26580 | K11744 A1-2 transport protein TqsA   (GenBank) hypothetical protein.                                  | No COG                         | 9.439    | 13.612   | 12.791   | 106.671 | 124.508  | 44.666   |
| AMK58_26585 | no KO assigned   (GenBank) HAD family hydrolase.                                                      | hydrolase                      | 6.250    | 10.669   | 12.055   | 303.321 | 140.308  | 218.744  |
| AMK58_26590 | no KO assigned   (GenBank) lipid kinase.                                                              | No COG                         | 55.270   | 50.676   | 55.153   | 36.469  | 36.138   | 29.431   |
| AMK58_26595 | no KO assigned   (GenBank) GntR family transcriptional regulator.                                     | Transcription                  | 191.965  | 171.928  | 238.914  | 290.994 | 47.534   | 183.374  |
| AMK58_26600 | K01577 oxalyl-CoA decarboxylase [EC:4.1.1.81]   (GenBank) oxalyl-CoA decarboxylase.                   | Metabolism: Carbohydrate       | 87.810   | 98.752   | 102.612  | 170.028 | 88.871   | 183.221  |
| AMK58_26605 | K00122 formate dehydrogenase [EC:1.2.1.21]   (GenBank) NADH-quinone oxidoreductase subunit F.         | Energy                         | 101.071  | 99.456   | 138.861  | 376.560 | 133.499  | 361.520  |
| AMK58_26610 | K00123 formate dehydrogenase major subunit [EC:1.2.1.21]   (GenBank) formate dehydrogenase.           | Metabolism                     | 24.444   | 25.740   | 30.264   | 70.551  | 21.644   | 63.473   |
| AMK58_26615 | K13641 IclR family transcriptional regulator, acetate operon repressor   (GenBank) transcriptional r  | Transcription                  | 8.730    | 9.405    | 9.933    | 103.139 | 39.251   | 141.067  |
| AMK58_26620 | K13639 MerR family transcriptional regulator, redox-sensitive transcriptional activator SoxR   (GenB  | Transcription                  | 60.275   | 67.325   | 75.251   | 128.836 | 94.558   | 207.043  |
| AMK58_26625 | no KO assigned   (GenBank) hypothetical protein.                                                      | Hypothetical                   | 80.253   | 108.088  | 91.742   | 415.096 | 393.680  | 1048.280 |
| AMK58_26630 | no KO assigned   (GenBank) MarR family transcriptional regulator.                                     | Transcription                  | 692.528  | 526.615  | 639.275  | 119.401 | 184.241  | 279.297  |
| AMK58_26635 | no KO assigned   (GenBank) formyl-coenzyme A transferase.                                             | transferase                    | 51.198   | 51.462   | 51.992   | 54.192  | 41.122   | 106.975  |
| AMK58_26640 | no KO assigned   (GenBank) histidine kinase.                                                          | Signal Transduction            | 699.920  | 807.663  | 880.163  | 669.537 | 282.972  | 300.171  |
| AMK58_26645 | K03406 methyl-accepting chemotaxis protein   (GenBank) chemotaxis protein.                            | Chemotaxis                     | 40.124   | 43.107   | 45.233   | 121.875 | 33.100   | 88.336   |
| AMK58_26650 | K01485 cytosine deaminase [EC:3.5.4.1]   (GenBank) cytosine deaminase.                                | Metabolism: Nucleotide         | 20.461   | 20.187   | 20.079   | 136.035 | 24.581   | 98.867   |
| AMK58_26655 | K02057 simple sugar transport system permease protein   (GenBank) ABC transporter permease.           | Transport: Sugar               | 14.283   | 10.177   | 15.200   | 172.015 | 19.000   | 85.296   |
| AMK58_26660 | K02057 simple sugar transport system permease protein   (GenBank) ABC transporter permease.           | Transport: Sugar               | 45.662   | 47.535   | 42.320   | 290.853 | 42.124   | 187.437  |
| AMK58_26665 | K02056 simple sugar transport system ATP-binding protein [EC:3.6.3.17]   (GenBank) sugar transp       | Transport: Sugar               | 253.770  | 245.810  | 230.089  | 109.491 | 79.785   | 134.112  |
| AMK58_26670 | no KO assigned   (GenBank) ABC transporter substrate-binding protein.                                 | Membrane Transport             | 72.051   | 103.539  | 86.452   | 98.266  | 34.157   | 98.621   |
| AMK58_26675 | K00761 uracil phosphoribosyltransferase [EC:2.4.2.91]   (GenBank) uracil phosphoribosyltransferase.   | Metabolism: Nucleotide         | 258.521  | 345.755  | 390.608  | 387.869 | 161.129  | 244.310  |
| AMK58_26680 | no KO assigned   (GenBank) uracil phosphoribosyltransferase.                                          | Transferase                    | 394.591  | 442.559  | 375.667  | 175.736 | 134.026  | 185.695  |
| AMK58_26685 | no KO assigned   (GenBank) hypothetical protein.                                                      | Hypothetical                   | 47.740   | 60.136   | 64.168   | 52.007  | 33.727   | 58.668   |
| AMK58_26690 | no KO assigned   (GenBank) hypothetical protein.                                                      | Hypothetical                   | 131.164  | 183.460  | 167.256  | 133.980 | 234.218  | 285.149  |
| AMK58_26695 | no KO assigned   (GenBank) hypothetical protein.                                                      | Hypothetical                   | 97.884   | 120.559  | 130.010  | 697.157 | 435.363  | 929.436  |
| AMK58_26700 | K01179 endoglucanase [EC:3.2.1.41]   (GenBank) endoglucanase.                                         | Metabolism: Carbohydrate       | 14.506   | 12.580   | 13.292   | 59.311  | 53.517   | 23.213   |
| AMK58_26705 | no KO assigned   (GenBank) hypothetical protein.                                                      | Hypothetical                   | 76.598   | 83.653   | 99.718   | 153.727 | 119.120  | 220.211  |
| AMK58_26710 | no KO assigned   (GenBank) hypothetical protein.                                                      | Hypothetical                   | 468.383  | 546.762  | 473.987  | 70.052  | 125.551  | 173.675  |
| AMK58_26715 | no KO assigned   (GenBank) hypothetical protein.                                                      | Hypothetical                   | 201.791  | 199.018  | 238.156  | 363.846 | 160.936  | 459.177  |
| AMK58_26720 | no KO assigned   (GenBank) transglycosylase.                                                          | transglycosylase               | 0.000    | 0.000    | 0.000    | 0.000   | 0.000    | 0.000    |
| AMK58_26725 | K01977 16S ribosomal RNA   (GenBank) 16S ribosomal RNA.                                               | Ribosome                       | 0.000    | 0.000    | 0.000    | 0.000   | 0.000    | 0.000    |
| AMK58_26730 | K14227 tRNA Ile   (GenBank) tRNA-Ile.                                                                 | tRNA synthesis/modification    | 0.000    | 0.000    | 0.000    | 0.000   | 0.000    | 0.000    |
| AMK58_26735 | K14218 tRNA Ala   (GenBank) tRNA-Ala.                                                                 | tRNA synthesis/modification    | 0.000    | 0.000    | 0.000    | 0.000   | 0.000    | 0.000    |
| AMK58_26740 | K01980 23S ribosomal RNA   (GenBank) 23S ribosomal RNA.                                               | Ribosome                       | 0.000    | 0.000    | 0.000    | 0.000   | 0.000    | 0.000    |
| AMK58_26745 | K01985 5S ribosomal RNA   (GenBank) 5S ribosomal RNA.                                                 | Ribosome                       | 46.969   | 37.415   | 32.749   | 51.732  | 127.881  | 191.633  |
| AMK58_26750 | K14230 tRNA Met   (GenBank) tRNA-Met.                                                                 | tRNA synthesis/modification    | 732.738  | 901.846  | 1079.427 | 271.714 | 364.093  | 886.493  |
| AMK58_26755 | no KO assigned   (GenBank) hypothetical protein.                                                      | Hypothetical                   | 223.923  | 320.843  | 434.172  | 362.302 | 398.036  | 380.872  |
| AMK58_26760 | K04564 superoxide dismutase, Fe-Mn family [EC:1.15.1.11]   (GenBank) superoxide dismutase.            | Defense                        | 1123.117 | 1217.120 | 1461.384 | 228.309 | 262.427  | 149.842  |
| AMK58_26765 | no KO assigned   (GenBank) cobalt transporter.                                                        | Transport: Metal               | 79.116   | 93.473   | 78.267   | 460.122 | 105.917  | 372.913  |
| AMK58_26770 | no KO assigned   (GenBank) hypothetical protein.                                                      | Hypothetical                   | 8.724    | 8.625    | 10.324   | 98.455  | 42.754   | 69.434   |
| AMK58_26775 | no KO assigned   (GenBank) glutathionylspermidine synthase.                                           | No COG                         | 5.914    | 6.198    | 7.102    | 55.035  | 44.198   | 26.937   |
| AMK58_26780 | no KO assigned   (GenBank) hypothetical protein.                                                      | Hypothetical                   | 1852.713 | 1858.220 | 1456.127 | 437.541 | 4632.007 | 680.105  |
| AMK58_26785 | no KO assigned   (GenBank) polyhydroxyalkanoate synthase repressor.                                   | Transcription                  | 59.628   | 68.426   | 65.856   | 406.926 | 117.498  | 196.219  |
| AMK58_26790 | K03821 polyhydroxyalkanoate synthase [EC:2.3.1.-1]   (GenBank) poly-beta-hydroxybutyrate polymerase.  | Metabolism: Carbohydrate (PHB) | 1312.711 | 1460.042 | 1563.422 | 184.279 | 210.137  | 173.172  |
| AMK58_26795 | K00626 acetyl-CoA C-acetyltransferase [EC:2.3.1.91]   (GenBank) acetyl-CoA acetyltransferase.         | Metabolism                     | 1836.713 | 2293.701 | 2231.800 | 74.887  | 74.990   | 160.290  |

|                             |                                                                                                                     |                                     |          |          |          |          |          |          |
|-----------------------------|---------------------------------------------------------------------------------------------------------------------|-------------------------------------|----------|----------|----------|----------|----------|----------|
| <a href="#">AMK58_26800</a> | <a href="#">K00023 acetoacetyl-CoA reductase [EC:1.1.1.36] (GenBank) acetoacetyl-CoA reductase</a>                  | Metabolism: Carbon                  | 25.287   | 26.013   | 33.596   | 134.145  | 61.176   | 75.157   |
| <a href="#">AMK58_26805</a> | <a href="#">no KO assigned (GenBank) hypothetical protein</a>                                                       | Hypothetical                        | 568.630  | 505.629  | 541.804  | 470.420  | 866.325  | 674.177  |
| <a href="#">AMK58_26810</a> | <a href="#">no KO assigned (GenBank) MFS transporter</a>                                                            | Transport: MFS                      | 18.024   | 27.506   | 31.946   | 163.104  | 142.590  | 84.747   |
| <a href="#">AMK58_26815</a> | <a href="#">no KO assigned (GenBank) transcriptional regulator</a>                                                  | Transcription                       | 15.781   | 16.229   | 15.743   | 129.783  | 137.547  | 58.894   |
| <a href="#">AMK58_26820</a> | <a href="#">no KO assigned (GenBank) phosphohydrolase</a>                                                           | hydrolase                           | 51.365   | 56.365   | 62.045   | 309.277  | 975.924  | 383.710  |
| <a href="#">AMK58_26825</a> | <a href="#">no KO assigned (GenBank) hypothetical protein</a>                                                       | Hypothetical                        | 315.923  | 255.810  | 256.920  | 314.102  | 205.684  | 431.105  |
| <a href="#">AMK58_26830</a> | <a href="#">K06942 ribosome-binding ATPase (GenBank) GTP-binding protein</a>                                        | Ribosome                            | 33.870   | 27.594   | 30.008   | 205.200  | 14.957   | 73.317   |
| <a href="#">AMK58_26835</a> | <a href="#">K03832 periplasmic protein TonB (GenBank) hypothetical protein</a>                                      | Transport                           | 603.123  | 417.700  | 380.877  | 348.489  | 95.451   | 478.572  |
| <a href="#">AMK58_26840</a> | <a href="#">K02014 iron complex outermembrane receptor protein (GenBank) TonB-dependent receptor</a>                | Transport: Ion                      | 63.946   | 62.704   | 69.082   | 52.540   | 7.297    | 35.316   |
| <a href="#">AMK58_26845</a> | <a href="#">no KO assigned (GenBank) hypothetical protein</a>                                                       | Hypothetical                        | 822.958  | 822.948  | 867.285  | 1068.311 | 341.219  | 1394.422 |
| <a href="#">AMK58_26850</a> | <a href="#">K02335 DNA polymerase I [EC:2.7.7.7] (GenBank) DNA polymerase I</a>                                     | DNA Repair and Replication          | 2.416    | 1.493    | 3.445    | 21.703   | 61.282   | 32.403   |
| <a href="#">AMK58_26855</a> | <a href="#">no KO assigned (GenBank) hypothetical protein</a>                                                       | Hypothetical                        | 7.487    | 4.364    | 13.196   | 223.342  | 392.474  | 176.448  |
| <a href="#">AMK58_26860</a> | <a href="#">no KO assigned (GenBank) hypothetical protein</a>                                                       | Hypothetical                        | 6.348    | 10.837   | 10.132   | 157.326  | 60.146   | 92.717   |
| <a href="#">AMK58_26865</a> | <a href="#">K14219 tRNA Arg (GenBank) tRNA-Arg</a>                                                                  | tRNA synthesis/modification         | 718.587  | 798.509  | 885.070  | 2281.314 | 2193.398 | 2259.974 |
| <a href="#">AMK58_26870</a> | <a href="#">no KO assigned (GenBank) alpha/beta hydrolase</a>                                                       | Hydrolase                           | 218.225  | 215.852  | 187.040  | 168.175  | 310.488  | 172.102  |
| <a href="#">AMK58_26875</a> | <a href="#">K01990 ABC-2 type transport system ATP-binding protein (GenBank) multidrug ABC transporter ATP-I</a>    | Membrane Transport                  | 224.717  | 309.602  | 228.421  | 34.708   | 243.196  | 95.662   |
| <a href="#">AMK58_26880</a> | <a href="#">no KO assigned (GenBank) hypothetical protein</a>                                                       | Hypothetical                        | 889.867  | 1055.388 | 998.327  | 2041.947 | 359.197  | 2501.835 |
| <a href="#">AMK58_26885</a> | <a href="#">no KO assigned (GenBank) diguanylate cyclase</a>                                                        | cyclic nucleotide                   | 10.442   | 7.009    | 9.816    | 53.276   | 8.901    | 79.198   |
| <a href="#">AMK58_26890</a> | <a href="#">no KO assigned (GenBank) hypothetical protein</a>                                                       | Hypothetical                        | 3.245    | 12.117   | 11.570   | 540.620  | 51.747   | 274.374  |
| <a href="#">AMK58_26895</a> | <a href="#">no KO assigned (GenBank) cytochrome C</a>                                                               | Energy                              | 2.669    | 2.552    | 5.583    | 183.782  | 39.844   | 133.258  |
| <a href="#">AMK58_26900</a> | <a href="#">K02275 cytochrome c oxidase subunit II [EC:1.9.3.1] (GenBank) cytochrome C oxidase subunit II</a>       | Energy                              | 6.136    | 6.345    | 12.903   | 261.299  | 102.667  | 461.881  |
| <a href="#">AMK58_26905</a> | <a href="#">K15408 cytochrome c oxidase subunit I+III [EC:1.9.3.1] (GenBank) cytochrome B</a>                       | Energy                              | 0.430    | 0.571    | 0.364    | 9.352    | 2.096    | 7.449    |
| <a href="#">AMK58_26910</a> | <a href="#">no KO assigned (GenBank) hypothetical protein</a>                                                       | Hypothetical                        | 32.959   | 38.177   | 44.449   | 500.073  | 156.507  | 250.424  |
| <a href="#">AMK58_26915</a> | <a href="#">no KO assigned (GenBank) cytochrome C oxidase subunit I</a>                                             | Energy                              | 3.915    | 3.599    | 4.009    | 142.417  | 27.083   | 60.184   |
| <a href="#">AMK58_26920</a> | <a href="#">K01512 acylphosphatase [EC:3.6.1.7] (GenBank) acylphosphatase</a>                                       | Metabolism                          | 36.240   | 36.906   | 47.770   | 911.330  | 276.815  | 793.907  |
| <a href="#">AMK58_26925</a> | <a href="#">no KO assigned (GenBank) purine permease</a>                                                            | Transport                           | 44.832   | 45.278   | 45.231   | 139.925  | 30.996   | 81.874   |
| <a href="#">AMK58_26930</a> | <a href="#">K01754 threonine dehydratase [EC:4.3.1.19] (GenBank) threonine dehydratase</a>                          | Metabolism                          | 10.017   | 14.525   | 12.668   | 114.768  | 10.057   | 45.088   |
| <a href="#">AMK58_26935</a> | <a href="#">no KO assigned (GenBank) carbon-nitrogen hydrolase</a>                                                  | hydrolase                           | 123.175  | 108.459  | 105.989  | 205.395  | 33.560   | 140.650  |
| <a href="#">AMK58_26940</a> | <a href="#">K01480 agmatinase [EC:3.5.3.11] (GenBank) agmatinase</a>                                                | Metabolism: Amino Acid              | 58.932   | 52.060   | 53.526   | 138.227  | 18.300   | 146.078  |
| <a href="#">AMK58_26945</a> | <a href="#">K02053 putative spermidine/putrescine transport system permease protein (GenBank) spermidine/putre</a>  | Quorum sensing                      | 94.018   | 88.500   | 82.351   | 152.467  | 22.088   | 194.264  |
| <a href="#">AMK58_26950</a> | <a href="#">K02054 putative spermidine/putrescine transport system permease protein (GenBank) ABC transporter</a>   | Membrane Transport                  | 131.695  | 128.597  | 106.367  | 167.308  | 28.970   | 119.360  |
| <a href="#">AMK58_26955</a> | <a href="#">K02052 putative spermidine/putrescine transport system ATP-binding protein (GenBank) ABC transport</a>  | Membrane Transport                  | 717.556  | 751.963  | 582.315  | 175.778  | 63.561   | 244.414  |
| <a href="#">AMK58_26960</a> | <a href="#">K02055 putative spermidine/putrescine transport system substrate-binding protein (GenBank) ABC tra</a>  | Quorum sensing                      | 13.381   | 14.183   | 14.775   | 86.008   | 33.235   | 128.480  |
| <a href="#">AMK58_26965</a> | <a href="#">no KO assigned (GenBank) transcriptional regulator</a>                                                  | Transcription                       | 8.354    | 5.375    | 8.677    | 41.666   | 34.673   | 81.997   |
| <a href="#">AMK58_26970</a> | <a href="#">no KO assigned (GenBank) hypothetical protein</a>                                                       | Hypothetical                        | 18.114   | 7.594    | 22.359   | 37.886   | 46.436   | 79.856   |
| <a href="#">AMK58_26975</a> | <a href="#">K07729 putative transcriptional regulator (GenBank) hypothetical protein</a>                            | Transcription                       | 559.250  | 478.410  | 635.286  | 648.744  | 919.529  | 944.491  |
| <a href="#">AMK58_26980</a> | <a href="#">K00640 serine O-acetyltransferase [EC:2.3.1.30] (GenBank) serine acetyltransferase</a>                  | Metabolism                          | 29.140   | 27.790   | 30.178   | 73.488   | 27.372   | 240.650  |
| <a href="#">AMK58_26985</a> | <a href="#">no KO assigned (GenBank) glycosyl transferase</a>                                                       | Glycosyl Transferase                | 45.583   | 52.745   | 60.814   | 598.784  | 48.605   | 456.597  |
| <a href="#">AMK58_26990</a> | <a href="#">no KO assigned (GenBank) hypothetical protein</a>                                                       | Hypothetical                        | 22.324   | 30.846   | 36.091   | 277.810  | 33.022   | 176.058  |
| <a href="#">AMK58_26995</a> | <a href="#">no KO assigned (GenBank) hypothetical protein</a>                                                       | Hypothetical                        | 4.611    | 6.190    | 6.946    | 162.880  | 44.549   | 90.459   |
| <a href="#">AMK58_27000</a> | <a href="#">K02769 PTS system, fructose-specific IIB component [EC:2.7.1.202] K02770 PTS system, fructose-speci</a> | Metabolism: Carbohydrate            | 1.709    | 2.356    | 3.187    | 68.326   | 19.357   | 35.290   |
| <a href="#">AMK58_27005</a> | <a href="#">K00882 1-phosphofructokinase [EC:2.7.1.56] (GenBank) hypothetical protein</a>                           | Metabolism: Carbohydrate            | 23.293   | 31.256   | 34.583   | 600.188  | 316.431  | 250.874  |
| <a href="#">AMK58_27010</a> | <a href="#">K02768 PTS system, fructose-specific IIA component [EC:2.7.1.202] K08483 phosphotransferase system</a>  | Metabolism: Carbohydrate            | 18.489   | 26.246   | 30.294   | 254.790  | 52.039   | 145.172  |
| <a href="#">AMK58_27015</a> | <a href="#">no KO assigned (GenBank) hypothetical protein</a>                                                       | Hypothetical                        | 6.909    | 9.061    | 8.011    | 31.658   | 15.153   | 35.431   |
| <a href="#">AMK58_27020</a> | <a href="#">no KO assigned (GenBank) two-component system response regulator</a>                                    | Signal Transduction                 | 225.605  | 269.574  | 301.025  | 760.225  | 617.914  | 787.050  |
| <a href="#">AMK58_27025</a> | <a href="#">no KO assigned (GenBank) ATPase</a>                                                                     | Enzyme                              | 20.740   | 32.894   | 30.851   | 98.887   | 49.030   | 74.549   |
| <a href="#">AMK58_27030</a> | <a href="#">no KO assigned (GenBank) Crp/Fnr family transcriptional regulator</a>                                   | Transcription                       | 22.744   | 20.434   | 53.657   | 344.530  | 154.931  | 436.869  |
| <a href="#">AMK58_27035</a> | <a href="#">no KO assigned (GenBank) cytochrome c oxidase accessory protein CcoG</a>                                | Energy                              | 21.366   | 23.965   | 20.549   | 69.634   | 100.115  | 145.138  |
| <a href="#">AMK58_27040</a> | <a href="#">no KO assigned (GenBank) hypothetical protein</a>                                                       | Hypothetical                        | 38.517   | 43.148   | 55.876   | 161.237  | 249.106  | 248.963  |
| <a href="#">AMK58_27045</a> | <a href="#">no KO assigned (GenBank) hypothetical protein</a>                                                       | Hypothetical                        | 642.429  | 501.115  | 603.726  | 290.318  | 717.597  | 294.192  |
| <a href="#">AMK58_27050</a> | <a href="#">K01624 fructose-bisphosphate aldolase, class II [EC:4.1.2.13] (GenBank) fructose-bisphosphate aldo</a>  | Metabolism: Carbohydrate            | 4.821    | 1.340    | 6.715    | 128.097  | 89.847   | 80.876   |
| <a href="#">AMK58_27055</a> | <a href="#">no KO assigned (GenBank) gluconolactonase</a>                                                           | No COG                              | 158.937  | 139.202  | 149.404  | 561.055  | 753.735  | 604.559  |
| <a href="#">AMK58_27060</a> | <a href="#">K01595 phosphoenolpyruvate carboxylase [EC:4.1.1.31] (GenBank) phosphoenolpyruvate carboxylase</a>      | Metabolism                          | 32.295   | 35.292   | 44.686   | 92.240   | 56.512   | 36.624   |
| <a href="#">AMK58_27065</a> | <a href="#">no KO assigned (GenBank) GntR family transcriptional regulator</a>                                      | Transcription                       | 26.339   | 22.843   | 30.214   | 222.849  | 151.469  | 195.940  |
| <a href="#">AMK58_27070</a> | <a href="#">no KO assigned (GenBank) cytochrome c oxidase accessory protein CcoG</a>                                | Energy                              | 43.270   | 44.455   | 48.524   | 108.882  | 128.002  | 116.019  |
| <a href="#">AMK58_27075</a> | <a href="#">no KO assigned (GenBank) hypothetical protein</a>                                                       | Hypothetical                        | 188.298  | 217.666  | 214.725  | 143.125  | 135.817  | 123.986  |
| <a href="#">AMK58_27080</a> | <a href="#">no KO assigned (GenBank) 2-hydroxychromene-2-carboxylate isomerase</a>                                  | No COG                              | 539.114  | 515.826  | 446.539  | 224.317  | 129.774  | 248.557  |
| <a href="#">AMK58_27085</a> | <a href="#">no KO assigned (GenBank) two-component system response regulator</a>                                    | Signal Transduction                 | 21.197   | 35.459   | 21.605   | 27.485   | 15.058   | 102.206  |
| <a href="#">AMK58_27090</a> | <a href="#">no KO assigned (GenBank) hypothetical protein</a>                                                       | Hypothetical                        | 305.291  | 272.231  | 259.327  | 512.717  | 122.923  | 635.591  |
| <a href="#">AMK58_27095</a> | <a href="#">no KO assigned (GenBank) hypothetical protein</a>                                                       | Hypothetical                        | 121.660  | 118.812  | 152.658  | 878.703  | 404.335  | 571.924  |
| <a href="#">AMK58_27100</a> | <a href="#">no KO assigned (GenBank) hypothetical protein</a>                                                       | Hypothetical                        | 38.643   | 45.423   | 49.026   | 73.359   | 51.854   | 53.113   |
| <a href="#">AMK58_27105</a> | <a href="#">no KO assigned (GenBank) NnrU protein</a>                                                               | No COG                              | 206.641  | 221.456  | 203.064  | 130.630  | 227.795  | 123.031  |
| <a href="#">AMK58_27110</a> | <a href="#">no KO assigned (GenBank) hypothetical protein</a>                                                       | Hypothetical                        | 364.246  | 445.611  | 342.685  | 127.969  | 377.845  | 191.380  |
| <a href="#">AMK58_27115</a> | <a href="#">no KO assigned (GenBank) thioesterase</a>                                                               | enzyme                              | 362.679  | 464.316  | 406.287  | 267.022  | 336.555  | 183.829  |
| <a href="#">AMK58_27120</a> | <a href="#">K03149 thiazole synthase [EC:2.8.1.10] (GenBank) thiG: thiazole synthase</a>                            | Metabolism: Co-Factors and Vitamins | 24.341   | 26.270   | 38.672   | 22.508   | 28.242   | 8.446    |
| <a href="#">AMK58_27125</a> | <a href="#">K03154 sulfur carrier protein (GenBank) thiamine biosynthesis protein ThiS</a>                          | Genetic Information Processing      | 1379.676 | 1953.060 | 1805.723 | 851.090  | 1576.089 | 381.717  |
| <a href="#">AMK58_27130</a> | <a href="#">K03153 glycine oxidase [EC:1.4.3.19] (GenBank) glycine oxidase</a>                                      | Metabolism: Co-Factors and Vitamins | 49.672   | 39.568   | 53.722   | 176.325  | 187.274  | 305.911  |

|                             |                                                                                                                      |                                     |          |          |          |          |          |          |
|-----------------------------|----------------------------------------------------------------------------------------------------------------------|-------------------------------------|----------|----------|----------|----------|----------|----------|
| <a href="#">AMK58_27135</a> | <a href="#">K06213 magnesium transporter   (GenBank) magnesium transporter</a>                                       | Transport: Inorganic                | 31.446   | 27.126   | 32.457   | 14.304   | 20.225   | 42.335   |
| <a href="#">AMK58_27140</a> | <a href="#">K20978 HptB-dependent secretion and biofilm anti anti-sigma factor   (GenBank) hypothetical protein</a>  | Signal transduction                 | 28.371   | 57.295   | 23.556   | 61.556   | 12.576   | 198.973  |
| <a href="#">AMK58_27145</a> | <a href="#">K14228 tRNA Leu   (GenBank) tRNA-Leu</a>                                                                 | tRNA synthesis/modification         | 460.641  | 424.036  | 506.788  | 1806.415 | 580.351  | 1699.531 |
| <a href="#">AMK58_27150</a> | <a href="#">K03801 lipov octanovyl transferase [EC:2.3.1.181]   (GenBank) lipov--protein ligase</a>                  | Metabolism: Co-Factors and Vitamins | 66.385   | 59.049   | 64.373   | 96.208   | 65.732   | 105.549  |
| <a href="#">AMK58_27155</a> | <a href="#">no KO assigned   (GenBank) hypothetical protein</a>                                                      | Hypothetical                        | 433.967  | 383.850  | 396.962  | 529.124  | 243.508  | 464.564  |
| <a href="#">AMK58_27160</a> | <a href="#">K00128 aldehyde dehydrogenase (NAD+) [EC:1.2.1.31]   (GenBank) aldehyde dehydrogenase</a>                | Energy                              | 877.708  | 920.771  | 860.434  | 198.002  | 197.430  | 267.810  |
| <a href="#">AMK58_27165</a> | <a href="#">K02035 peptide/nickel transport system substrate-binding protein   (GenBank) peptide ABC transporter</a> | Quorum sensing                      | 76.761   | 87.520   | 108.433  | 80.946   | 38.531   | 114.036  |
| <a href="#">AMK58_27170</a> | <a href="#">K02033 peptide/nickel transport system permease protein   (GenBank) ABC transporter permease</a>         | Quorum sensing                      | 50.881   | 67.306   | 78.158   | 130.843  | 55.940   | 115.714  |
| <a href="#">AMK58_27175</a> | <a href="#">K02034 peptide/nickel transport system permease protein   (GenBank) peptide ABC transporter permease</a> | Quorum sensing                      | 46.794   | 71.294   | 63.360   | 181.943  | 53.804   | 138.255  |
| <a href="#">AMK58_27180</a> | <a href="#">no KO assigned   (GenBank) methionine ABC transporter ATP-binding protein</a>                            | Membrane Transport                  | 49.408   | 65.029   | 63.374   | 202.650  | 51.413   | 88.001   |
| <a href="#">AMK58_27185</a> | <a href="#">no KO assigned   (GenBank) peptide ABC transporter ATP-binding protein</a>                               | Membrane Transport                  | 141.734  | 177.968  | 174.848  | 145.613  | 147.434  | 179.542  |
| <a href="#">AMK58_27190</a> | <a href="#">K01438 acetylornithine deacetylase [EC:3.5.1.16]   (GenBank) acetylornithine deacetylase</a>             | Metabolism: Amino Acid              | 137.562  | 201.839  | 164.263  | 47.423   | 724.807  | 49.147   |
| <a href="#">AMK58_27195</a> | <a href="#">no KO assigned   (GenBank) hypothetical protein</a>                                                      | Hypothetical                        | 358.532  | 423.359  | 452.444  | 672.631  | 398.785  | 683.191  |
| <a href="#">AMK58_27200</a> | <a href="#">K13775 citronellol/citronellal dehydrogenase   (GenBank) short-chain dehydrogenase</a>                   | Metabolism                          | 13.891   | 23.588   | 26.555   | 188.825  | 75.772   | 126.642  |
| <a href="#">AMK58_27205</a> | <a href="#">no KO assigned   (GenBank) hypothetical protein</a>                                                      | Hypothetical                        | 28.364   | 38.734   | 38.065   | 296.798  | 135.182  | 152.248  |
| <a href="#">AMK58_27210</a> | <a href="#">K07335 basic membrane protein A and related proteins   (GenBank) ABC transporter substrate-binding p</a> | Membrane                            | 322.988  | 469.125  | 441.347  | 243.360  | 222.299  | 166.765  |
| <a href="#">AMK58_27215</a> | <a href="#">no KO assigned   (GenBank) hypothetical protein</a>                                                      | Hypothetical                        | 39.745   | 31.742   | 42.162   | 121.126  | 77.407   | 123.449  |
| <a href="#">AMK58_27220</a> | <a href="#">no KO assigned   (GenBank) isochorismatase</a>                                                           | No COG                              | 110.302  | 108.551  | 87.295   | 74.308   | 140.250  | 156.402  |
| <a href="#">AMK58_27225</a> | <a href="#">no KO assigned   (GenBank) hypothetical protein</a>                                                      | Hypothetical                        | 122.154  | 152.150  | 152.671  | 164.788  | 259.572  | 175.309  |
| <a href="#">AMK58_27230</a> | <a href="#">no KO assigned   (GenBank) hypothetical protein</a>                                                      | Hypothetical                        | 395.829  | 397.905  | 430.042  | 160.854  | 689.852  | 296.436  |
| <a href="#">AMK58_27235</a> | <a href="#">K00963 UTP--glucose-1-phosphate uridylyltransferase [EC:2.7.7.9]   (GenBank) UTP--glucose-1-phosph</a>   | Metabolism: Carbohydrate            | 41.611   | 56.538   | 42.740   | 138.510  | 154.083  | 164.017  |
| <a href="#">AMK58_27240</a> | <a href="#">no KO assigned   (GenBank) hypothetical protein</a>                                                      | Hypothetical                        | 36.178   | 50.913   | 38.526   | 219.909  | 369.241  | 159.086  |
| <a href="#">AMK58_27245</a> | <a href="#">no KO assigned   (GenBank) hypothetical protein</a>                                                      | Hypothetical                        | 35.658   | 34.861   | 37.911   | 285.942  | 57.024   | 134.663  |
| <a href="#">AMK58_27250</a> | <a href="#">K06177 rRNA pseudouridine32 synthase / 23S rRNA pseudouridine746 synthase [EC:5.4.99.28 5.4.99.29]</a>   | tRNA synthesis/modification         | 61.985   | 73.251   | 74.317   | 190.243  | 93.791   | 91.111   |
| <a href="#">AMK58_27255</a> | <a href="#">K02058 simple sugar transport system substrate-binding protein   (GenBank) hypothetical protein</a>      | Transport: Sugar                    | 4.925    | 2.870    | 5.253    | 92.839   | 43.483   | 43.660   |
| <a href="#">AMK58_27260</a> | <a href="#">no KO assigned   (GenBank) endonuclease III</a>                                                          | DNA Repair and Replication          | 21.861   | 26.791   | 26.115   | 539.118  | 49.775   | 135.139  |
| <a href="#">AMK58_27265</a> | <a href="#">K00652 8-amino-7-oxononanoate synthase [EC:2.3.1.47]   (GenBank) 8-amino-7-oxononanoate synthase</a>     | Metabolism: Co-Factors and Vitamins | 7.375    | 9.792    | 9.739    | 99.068   | 18.998   | 65.443   |
| <a href="#">AMK58_27270</a> | <a href="#">K02170 pimeloyl-lacyl-carrier protein   methyl ester esterase [EC:3.1.1.85]   (GenBank) hypothetical</a> | Metabolism: Co-Factors and Vitamins | 4.297    | 8.251    | 9.046    | 363.839  | 19.664   | 96.333   |
| <a href="#">AMK58_27275</a> | <a href="#">K01935 dehydrobiotin synthetase [EC:6.3.3.3] K02169 malonyl-CoA O-methyltransferase [EC:2.1.1.197]  </a> | Metabolism: Co-Factors and Vitamins | 15.800   | 10.773   | 13.880   | 222.229  | 16.119   | 115.136  |
| <a href="#">AMK58_27280</a> | <a href="#">K00833 adenosylmethionine--8-amino-7-oxononanoate aminotransferase [EC:2.6.1.62]   (GenBank) aden</a>    | Metabolism: Co-Factors and Vitamins | 66.985   | 58.755   | 56.457   | 235.884  | 21.066   | 164.060  |
| <a href="#">AMK58_27285</a> | <a href="#">K01012 biotin synthase [EC:2.8.1.61]   (GenBank) biotin synthase</a>                                     | Metabolism: Co-Factors and Vitamins | 46.333   | 53.177   | 48.227   | 78.071   | 119.510  | 90.675   |
| <a href="#">AMK58_27290</a> | <a href="#">no KO assigned   (GenBank) hypothetical protein</a>                                                      | Hypothetical                        | 3291.250 | 2517.441 | 2388.718 | 588.726  | 767.350  | 785.412  |
| <a href="#">AMK58_27295</a> | <a href="#">K01006 pyruvate_orthophosphate dikinase [EC:2.7.9.1]   (GenBank) pyruvate phosphate dikinase</a>         | Metabolism                          | 4.135    | 5.907    | 5.769    | 91.267   | 6.820    | 27.922   |
| <a href="#">AMK58_27300</a> | <a href="#">no KO assigned   (GenBank) serine hydrolase</a>                                                          | No COG                              | 21.353   | 27.385   | 26.149   | 119.655  | 27.772   | 142.125  |
| <a href="#">AMK58_27305</a> | <a href="#">K03411 chemotaxis protein CheD [EC:3.5.1.44]   (GenBank) chemotaxis protein</a>                          | Chemotaxis                          | 34.332   | 42.550   | 32.643   | 107.145  | 29.969   | 261.455  |
| <a href="#">AMK58_27310</a> | <a href="#">K03704 cold shock protein (beta-ribon_CspA family)   (GenBank) hypothetical protein</a>                  | Stress Response                     | 1139.781 | 967.183  | 1116.050 | 511.463  | 1002.349 | 774.324  |
| <a href="#">AMK58_27315</a> | <a href="#">K01897 long-chain acyl-CoA synthetase [EC:6.2.1.3]   (GenBank) dicarboxylate--CoA ligase PimA</a>        | Metabolism: Lipid                   | 50.732   | 59.006   | 55.735   | 72.812   | 88.413   | 96.523   |
| <a href="#">AMK58_27320</a> | <a href="#">K03274 ADP-L-glycerol-D-manno-heptose 6-epimerase [EC:5.1.3.20]   (GenBank) ADP-L-glycerol-D-mar</a>     | Biosynthesis: polysaccharide        | 64.401   | 50.569   | 63.799   | 139.345  | 84.800   | 153.447  |
| <a href="#">AMK58_27325</a> | <a href="#">K13292 phosphatidylglycerol:prolinoprotein diacylglycerol transferase [EC:2.-.-.1]   (GenBank) proli</a> | Biosynthesis: polysaccharide        | 48.460   | 41.232   | 41.939   | 298.245  | 104.726  | 130.216  |
| <a href="#">AMK58_27330</a> | <a href="#">no KO assigned   (GenBank) ATP synthase subunit beta</a>                                                 | No COG                              | 54.596   | 55.003   | 57.000   | 108.984  | 86.156   | 106.711  |
| <a href="#">AMK58_27335</a> | <a href="#">K05810 laccase domain-containing protein   (GenBank) polyphenol oxidase</a>                              | No COG                              | 270.684  | 392.759  | 318.526  | 102.844  | 137.156  | 146.477  |
| <a href="#">AMK58_27340</a> | <a href="#">no KO assigned   (GenBank) hypothetical protein</a>                                                      | Hypothetical                        | 1338.168 | 1298.097 | 1319.886 | 341.372  | 1079.045 | 567.233  |
| <a href="#">AMK58_27345</a> | <a href="#">K00948 ribose-phosphate pyrophosphokinase [EC:2.7.6.1]   (GenBank) phosphoribosylpyrophosphate syr</a>   | Metabolism: Carbon                  | 562.687  | 396.454  | 438.706  | 51.116   | 173.315  | 129.302  |
| <a href="#">AMK58_27350</a> | <a href="#">K02897 large subunit ribosomal protein L25   (GenBank) 50S ribosomal protein L25</a>                     | Ribosome                            | 32.841   | 26.003   | 30.473   | 119.519  | 44.920   | 181.980  |
| <a href="#">AMK58_27355</a> | <a href="#">K01056 peptidyl-tRNA hydrolase, PTH1 family [EC:3.1.1.29]   (GenBank) peptidyl-tRNA hydrolase</a>        | tRNA synthesis/modification         | 73.780   | 90.419   | 89.937   | 264.115  | 32.133   | 295.877  |
| <a href="#">AMK58_27360</a> | <a href="#">K02057 simple sugar transport system permease protein   (GenBank) ABC transporter permease</a>           | Transport: Sugar                    | 44.444   | 45.857   | 59.914   | 171.804  | 19.342   | 74.846   |
| <a href="#">AMK58_27365</a> | <a href="#">K02057 simple sugar transport system permease protein   (GenBank) sugar ABC transporter permease</a>     | Transport: Sugar                    | 102.658  | 99.164   | 134.359  | 274.726  | 32.075   | 147.585  |
| <a href="#">AMK58_27370</a> | <a href="#">K02056 simple sugar transport system ATP-binding protein [EC:3.6.3.17]   (GenBank) sugar ABC transp</a>  | Transport: Sugar                    | 221.619  | 232.257  | 223.855  | 112.202  | 37.029   | 139.125  |
| <a href="#">AMK58_27375</a> | <a href="#">K02058 simple sugar transport system substrate-binding protein   (GenBank) sugar ABC transporter sub</a> | Transport: Sugar                    | 10.027   | 15.725   | 14.658   | 302.545  | 24.936   | 120.173  |
| <a href="#">AMK58_27380</a> | <a href="#">K13877 2,5-dioxopentanoate dehydrogenase [EC:1.2.1.26]   (GenBank) 2,5-dioxovalerate dehydrogenase</a>   | Metabolism: Carbohydrate            | 7.811    | 8.236    | 9.247    | 143.413  | 15.839   | 57.591   |
| <a href="#">AMK58_27385</a> | <a href="#">K01714 4-hydroxy-tetrahydrodipicolinate synthase [EC:4.3.3.7]   (GenBank) cvtochrome C biogenesis pr</a> | Biosynthesis: Amino Acid            | 8.490    | 13.265   | 14.405   | 215.898  | 21.875   | 115.419  |
| <a href="#">AMK58_27390</a> | <a href="#">no KO assigned   (GenBank) gluconolactonase</a>                                                          | No COG                              | 46.104   | 49.041   | 47.739   | 312.093  | 58.897   | 193.586  |
| <a href="#">AMK58_27395</a> | <a href="#">no KO assigned   (GenBank) transcriptional regulator</a>                                                 | Transcription                       | 112.838  | 108.960  | 118.587  | 111.749  | 109.642  | 235.995  |
| <a href="#">AMK58_27400</a> | <a href="#">K10546 putative multiple sugar transport system substrate-binding protein   (GenBank) sugar ABC tran</a> | Transport: Sugar                    | 40.920   | 40.298   | 45.321   | 215.796  | 81.883   | 277.703  |
| <a href="#">AMK58_27405</a> | <a href="#">K10548 putative multiple sugar transport system ATP-binding protein [EC:3.6.3.17]   (GenBank) ABC tr</a> | Transport: Sugar                    | 18.352   | 20.906   | 23.881   | 170.311  | 35.487   | 133.469  |
| <a href="#">AMK58_27410</a> | <a href="#">K10547 putative multiple sugar transport system permease protein   (GenBank) ABC transporter permeas</a> | Transport: Sugar                    | 6.993    | 8.356    | 9.213    | 217.051  | 28.858   | 91.428   |
| <a href="#">AMK58_27415</a> | <a href="#">K00035 D-galactose 1-dehydrogenase [EC:1.1.1.48]   (GenBank) galactose 1-dehydrogenase</a>               | Metabolism: Carbohydrate            | 33.673   | 39.200   | 45.435   | 391.866  | 157.523  | 374.577  |
| <a href="#">AMK58_27420</a> | <a href="#">K01687 dihydroxy-acid dehydratase [EC:4.2.1.9]   (GenBank) dihydroxy-acid dehydratase</a>                | Metabolism                          | 7.754    | 7.523    | 12.350   | 101.644  | 49.089   | 131.135  |
| <a href="#">AMK58_27425</a> | <a href="#">no KO assigned   (GenBank) lysophospholipase</a>                                                         | enzyme                              | 5.094    | 8.779    | 8.476    | 211.918  | 30.830   | 179.759  |
| <a href="#">AMK58_27430</a> | <a href="#">K01785 aldose 1-epimerase [EC:5.1.3.3]   (GenBank) aldose epimerase</a>                                  | Metabolism: Carbohydrate            | 4.397    | 6.735    | 10.290   | 253.095  | 62.851   | 214.713  |
| <a href="#">AMK58_27435</a> | <a href="#">K00041 tagaturonate reductase [EC:1.1.1.58]   (GenBank) tagaturonate reductase</a>                       | Metabolism: Carbohydrate            | 80.154   | 114.315  | 121.081  | 82.062   | 45.816   | 71.492   |
| <a href="#">AMK58_27440</a> | <a href="#">K02020 molybdate transport system substrate-binding protein   (GenBank) hypothetical protein</a>         | Transport                           | 24.725   | 42.887   | 46.715   | 179.067  | 80.329   | 65.528   |
| <a href="#">AMK58_27445</a> | <a href="#">K02018 molybdate transport system permease protein   (GenBank) hypothetical protein</a>                  | Transport                           | 8.552    | 14.342   | 17.831   | 336.430  | 138.286  | 243.738  |
| <a href="#">AMK58_27450</a> | <a href="#">no KO assigned   (GenBank) hypothetical protein</a>                                                      | Hypothetical                        | 6.630    | 7.463    | 11.055   | 144.423  | 46.120   | 93.023   |
| <a href="#">AMK58_27455</a> | <a href="#">K19431 pyruvyl transferase EpsO [EC:2.-.-.1]   (GenBank) hypothetical protein</a>                        | transferase                         | 20.295   | 11.779   | 20.289   | 292.680  | 46.277   | 194.966  |
| <a href="#">AMK58_27460</a> | <a href="#">no KO assigned   (GenBank) copper oxidase</a>                                                            | No COG                              | 9.139    | 9.181    | 12.688   | 89.598   | 10.818   | 29.099   |
| <a href="#">AMK58_27465</a> | <a href="#">no KO assigned   (GenBank) hypothetical protein</a>                                                      | Hypothetical                        | 344.166  | 351.631  | 342.692  | 291.709  | 218.316  | 317.838  |



|                             |                                                                                                                      |                                     |         |         |         |          |       |        |
|-----------------------------|----------------------------------------------------------------------------------------------------------------------|-------------------------------------|---------|---------|---------|----------|-------|--------|
| <a href="#">AMK58_27805</a> | <a href="#">no KO assigned   (GenBank) hypothetical protein</a>                                                      | Hypothetical                        | 0.000   | 0.000   | 0.000   | 0.000    | 0.000 | 0.000  |
| <a href="#">AMK58_27810</a> | <a href="#">no KO assigned   (GenBank) hypothetical protein</a>                                                      | Hypothetical                        | 0.000   | 0.000   | 0.000   | 0.000    | 0.000 | 0.000  |
| <a href="#">AMK58_27815</a> | <a href="#">no KO assigned   (GenBank) hypothetical protein</a>                                                      | Hypothetical                        | 0.000   | 0.000   | 0.000   | 0.000    | 0.000 | 0.000  |
| <a href="#">AMK58_27820</a> | <a href="#">no KO assigned   (GenBank) hypothetical protein</a>                                                      | Hypothetical                        | 0.000   | 0.000   | 0.000   | 0.000    | 0.000 | 0.000  |
| <a href="#">AMK58_27825</a> | <a href="#">K04748 nitric oxide reductase NorO protein   (GenBank) AAA family ATPase</a>                             | Nitrogen                            | 0.000   | 0.000   | 0.000   | 0.000    | 0.000 | 0.000  |
| <a href="#">AMK58_27830</a> | <a href="#">K04561 nitric oxide reductase subunit B [EC:1.7.2.5]   (GenBank) nitric oxide reductase</a>              | Nitrogen                            | 0.000   | 0.000   | 0.000   | 0.000    | 0.000 | 0.000  |
| <a href="#">AMK58_27835</a> | <a href="#">K02305 nitric oxide reductase subunit C   (GenBank) cytochrome C</a>                                     | Energy                              | 7.216   | 7.984   | 8.894   | 106.692  | 0.000 | 0.000  |
| <a href="#">AMK58_27840</a> | <a href="#">K00368 nitrite reductase (NO-forming) [EC:1.7.2.1]   (GenBank) copper oxidase</a>                        | Nitrogen                            | 0.000   | 0.000   | 0.000   | 0.000    | 0.000 | 0.000  |
| <a href="#">AMK58_27845</a> | <a href="#">no KO assigned   (GenBank) hypothetical protein</a>                                                      | Hypothetical                        | 4.634   | 4.615   | 3.488   | 122.092  | 0.000 | 0.179  |
| <a href="#">AMK58_27850</a> | <a href="#">no KO assigned   (GenBank) hypothetical protein</a>                                                      | Hypothetical                        | 16.188  | 9.274   | 18.343  | 232.288  | 0.000 | 0.411  |
| <a href="#">AMK58_27855</a> | <a href="#">no KO assigned   (GenBank) hypothetical protein</a>                                                      | Hypothetical                        | 66.028  | 59.049  | 163.673 | 224.339  | 0.000 | 0.255  |
| <a href="#">AMK58_27860</a> | <a href="#">K00404 cytochrome c oxidase cbb3-type subunit I [EC:1.9.3.1]   (GenBank) hypothetical protein</a>        | Energy                              | 24.311  | 21.571  | 46.612  | 76.418   | 0.000 | 0.149  |
| <a href="#">AMK58_27865</a> | <a href="#">K01739 cystathionine gamma-synthase [EC:2.5.1.48]   (GenBank) O-succinylhomoserine (thio)-lyase</a>      | Biosynthesis: Amino Acid            | 4.802   | 5.494   | 9.715   | 56.115   | 0.000 | 0.000  |
| <a href="#">AMK58_27870</a> | <a href="#">no KO assigned   (GenBank) hypothetical protein</a>                                                      | Hypothetical                        | 8.698   | 14.550  | 50.613  | 2576.332 | 0.000 | 0.323  |
| <a href="#">AMK58_27875</a> | <a href="#">K02230 cobaltochelatase CobN [EC:6.6.1.2]   (GenBank) cobalamin biosynthesis protein CobN</a>            | Metabolism: Co-Factors and Vitamins | 0.309   | 0.184   | 0.440   | 30.526   | 0.000 | 0.000  |
| <a href="#">AMK58_27880</a> | <a href="#">no KO assigned   (GenBank) biopolymer transporter ExbD</a>                                               | Transport: Biopolymer               | 0.990   | 2.959   | 2.119   | 79.932   | 0.000 | 0.000  |
| <a href="#">AMK58_27885</a> | <a href="#">no KO assigned   (GenBank) hypothetical protein</a>                                                      | Hypothetical                        | 4.443   | 6.636   | 8.449   | 300.565  | 0.000 | 0.000  |
| <a href="#">AMK58_27890</a> | <a href="#">no KO assigned   (GenBank) hypothetical protein</a>                                                      | Hypothetical                        | 9.526   | 8.986   | 19.306  | 578.228  | 0.000 | 0.000  |
| <a href="#">AMK58_27895</a> | <a href="#">K02016 iron complex transport system substrate-binding protein   (GenBank) iron complex transporter</a>  | Transport: Metal                    | 0.993   | 0.742   | 3.424   | 237.041  | 0.000 | 0.115  |
| <a href="#">AMK58_27900</a> | <a href="#">K02015 iron complex transport system permease protein   (GenBank) ABC transporter permease</a>           | Transport: Metal                    | 1.294   | 0.703   | 3.132   | 179.366  | 0.000 | 0.000  |
| <a href="#">AMK58_27905</a> | <a href="#">no KO assigned   (GenBank) hypothetical protein</a>                                                      | Hypothetical                        | 20.179  | 31.290  | 26.217  | 512.144  | 0.000 | 0.286  |
| <a href="#">AMK58_27910</a> | <a href="#">K02014 iron complex outermembrane receptor protein   (GenBank) TonB-dependent receptor</a>               | Transport: Metal                    | 13.490  | 13.769  | 14.858  | 74.467   | 0.000 | 0.000  |
| <a href="#">AMK58_27915</a> | <a href="#">K07722 CopG family transcriptional regulator, nickel-responsive regulator   (GenBank) nickel respons</a> | Transcription                       | 86.231  | 113.820 | 87.471  | 170.245  | 0.000 | 0.232  |
| <a href="#">AMK58_27920</a> | <a href="#">K15584 nickel transport system substrate-binding protein   (GenBank) hypothetical protein</a>            | Transport: Metal                    | 78.427  | 85.503  | 99.606  | 372.299  | 0.000 | 0.265  |
| <a href="#">AMK58_27925</a> | <a href="#">no KO assigned   (GenBank) hypothetical protein</a>                                                      | Hypothetical                        | 5.185   | 7.228   | 7.477   | 109.166  | 0.000 | 0.080  |
| <a href="#">AMK58_27930</a> | <a href="#">no KO assigned   (GenBank) hypothetical protein</a>                                                      | Hypothetical                        | 1.218   | 2.079   | 2.316   | 65.014   | 0.000 | 0.161  |
| <a href="#">AMK58_27935</a> | <a href="#">no KO assigned   (GenBank) hypothetical protein</a>                                                      | Hypothetical                        | 6.402   | 6.652   | 11.115  | 241.228  | 0.000 | 0.258  |
| <a href="#">AMK58_27940</a> | <a href="#">no KO assigned   (GenBank) hypothetical protein</a>                                                      | Hypothetical                        | 38.677  | 43.535  | 41.837  | 230.890  | 2.520 | 28.847 |
| <a href="#">AMK58_27945</a> | <a href="#">K07497 putative transposase   (GenBank) integrase</a>                                                    | Genetic Information Processing      | 2.758   | 4.337   | 3.037   | 55.618   | 0.000 | 0.000  |
| <a href="#">AMK58_27950</a> | <a href="#">K07483 transposase   (GenBank) transposase</a>                                                           | Genetic Information Processing      | 12.320  | 25.381  | 11.310  | 76.256   | 0.000 | 0.000  |
| <a href="#">AMK58_27955</a> | <a href="#">no KO assigned   (GenBank) hypothetical protein</a>                                                      | Hypothetical                        | 269.361 | 326.971 | 234.889 | 81.912   | 0.000 | 0.567  |
| <a href="#">AMK58_27960</a> | <a href="#">no KO assigned   (GenBank) hypothetical protein</a>                                                      | Hypothetical                        | 199.255 | 190.139 | 172.788 | 43.558   | 0.000 | 0.000  |
| <a href="#">AMK58_27965</a> | <a href="#">no KO assigned   (GenBank) hypothetical protein</a>                                                      | Hypothetical                        | 94.676  | 104.870 | 92.647  | 104.051  | 0.000 | 0.256  |
| <a href="#">AMK58_27970</a> | <a href="#">no KO assigned   (GenBank) hypothetical protein</a>                                                      | Hypothetical                        | 663.738 | 701.098 | 668.280 | 285.281  | 0.000 | 1.727  |
| <a href="#">AMK58_27975</a> | <a href="#">no KO assigned   (GenBank) hypothetical protein</a>                                                      | Hypothetical                        | 16.894  | 11.215  | 23.648  | 127.611  | 0.000 | 0.000  |
| <a href="#">AMK58_27980</a> | <a href="#">no KO assigned   (GenBank) hypothetical protein</a>                                                      | Hypothetical                        | 2.187   | 4.574   | 4.160   | 89.371   | 0.000 | 0.000  |
| <a href="#">AMK58_27985</a> | <a href="#">no KO assigned   (GenBank) hypothetical protein</a>                                                      | Hypothetical                        | 26.849  | 21.455  | 26.287  | 112.935  | 0.000 | 0.000  |
| <a href="#">AMK58_27990</a> | <a href="#">K07497 putative transposase   (GenBank) hypothetical protein</a>                                         | Genetic Information Processing      | 23.010  | 22.117  | 24.363  | 78.176   | 0.000 | 0.269  |
| <a href="#">AMK58_27995</a> | <a href="#">no KO assigned   (GenBank) transposase</a>                                                               | Genetic Information Processing      | 44.251  | 50.395  | 45.900  | 86.047   | 0.000 | 0.000  |
| <a href="#">AMK58_28000</a> | <a href="#">no KO assigned   (GenBank) hypothetical protein</a>                                                      | Hypothetical                        | 10.612  | 18.471  | 15.969  | 110.139  | 0.000 | 0.155  |
| <a href="#">AMK58_28005</a> | <a href="#">no KO assigned   (GenBank) hypothetical protein</a>                                                      | Hypothetical                        | 11.860  | 24.604  | 26.470  | 135.707  | 0.000 | 0.153  |
| <a href="#">AMK58_28010</a> | <a href="#">no KO assigned   (GenBank) enoyl-CoA hydratase</a>                                                       | hydratase                           | 6.777   | 8.097   | 7.016   | 89.767   | 0.000 | 0.279  |
| <a href="#">AMK58_28015</a> | <a href="#">K00059 3-oxoacyl-[acyl-carrier protein] reductase [EC:1.1.1.100]   (GenBank) 3-oxoacyl-ACP reductase</a> | Metabolism: Lipid                   | 6.914   | 10.567  | 8.867   | 122.339  | 0.000 | 0.149  |
| <a href="#">AMK58_28020</a> | <a href="#">no KO assigned   (GenBank) propanoyl-CoA acyltransferase</a>                                             | Transferase                         | 4.729   | 2.512   | 6.296   | 136.281  | 0.000 | 0.097  |
| <a href="#">AMK58_28025</a> | <a href="#">no KO assigned   (GenBank) hypothetical protein</a>                                                      | Hypothetical                        | 2.182   | 4.344   | 1.383   | 106.663  | 0.000 | 0.000  |
| <a href="#">AMK58_28030</a> | <a href="#">no KO assigned   (GenBank) short-chain dehydrogenase</a>                                                 | Dehydrogenase                       | 11.138  | 12.099  | 12.929  | 179.431  | 0.000 | 0.268  |
| <a href="#">AMK58_28035</a> | <a href="#">K03566 LvsR family transcriptional regulator, glycine cleavage system transcriptional activator   (G</a> | Transcription                       | 53.081  | 52.310  | 55.023  | 99.511   | 0.000 | 0.000  |
| <a href="#">AMK58_28040</a> | <a href="#">K03761 MFS transporter, MFS family, alpha-ketoglutarate permease   (GenBank) transporter</a>             | Transport: MFS                      | 10.940  | 11.534  | 11.713  | 122.779  | 0.000 | 0.085  |
| <a href="#">AMK58_28045</a> | <a href="#">no KO assigned   (GenBank) hydroxyvacid dehydrogenase</a>                                                | Dehydrogenase                       | 2.854   | 3.247   | 2.196   | 135.974  | 0.000 | 0.000  |
| <a href="#">AMK58_28050</a> | <a href="#">no KO assigned   (GenBank) carnitine dehydratase</a>                                                     | Dehydrogenase                       | 8.371   | 10.121  | 11.370  | 148.303  | 0.000 | 0.370  |
| <a href="#">AMK58_28055</a> | <a href="#">K00128 aldehyde dehydrogenase (NAD+) [EC:1.2.1.31]   (GenBank) aldehyde dehydrogenase</a>                | Energy                              | 2.949   | 5.034   | 4.646   | 223.697  | 0.000 | 0.000  |
| <a href="#">AMK58_28060</a> | <a href="#">no KO assigned   (GenBank) hypothetical protein</a>                                                      | Hypothetical                        | 4.901   | 1.722   | 5.482   | 234.011  | 0.000 | 0.000  |
| <a href="#">AMK58_28065</a> | <a href="#">no KO assigned   (GenBank) transcriptional regulator</a>                                                 | Transcription                       | 32.834  | 56.397  | 38.243  | 96.945   | 0.154 | 0.127  |
| <a href="#">AMK58_28070</a> | <a href="#">no KO assigned   (GenBank) hypothetical protein</a>                                                      | Hypothetical                        | 2.274   | 5.094   | 4.594   | 103.175  | 0.000 | 0.527  |
| <a href="#">AMK58_28075</a> | <a href="#">K06893 uncharacterized protein   (GenBank) ketosteroid isomerase</a>                                     | Enzyme                              | 13.369  | 16.577  | 10.553  | 81.093   | 0.000 | 0.000  |
| <a href="#">AMK58_28080</a> | <a href="#">no KO assigned   (GenBank) pseudogene</a>                                                                | Pseudogene                          | 15.785  | 17.146  | 13.985  | 133.353  | 0.000 | 0.000  |
| <a href="#">AMK58_28085</a> | <a href="#">K01118 FMN-dependent NADH-azoreductase [EC:1.7.-.-1]   (GenBank) FMN-dependent NADH-azoreduc</a>         | Energy                              | 13.986  | 13.130  | 11.398  | 95.278   | 0.000 | 0.185  |
| <a href="#">AMK58_28090</a> | <a href="#">no KO assigned   (GenBank) Isoquinoline 1-oxidoreductase subunit</a>                                     | Oxidoreductase                      | 7.884   | 12.336  | 12.850  | 251.954  | 0.000 | 0.174  |
| <a href="#">AMK58_28095</a> | <a href="#">K07303 isoquinoline 1-oxidoreductase subunit beta [EC:1.3.99.16]   (GenBank) aldehyde dehydrogenase</a>  | Oxidoreductase                      | 7.248   | 8.857   | 10.389  | 200.066  | 0.000 | 0.051  |
| <a href="#">AMK58_28100</a> | <a href="#">K07302 isoquinoline 1-oxidoreductase subunit alpha [EC:1.3.99.16]   (GenBank) hypothetical protein</a>   | Oxidoreductase                      | 11.930  | 10.615  | 13.998  | 124.104  | 0.000 | 0.235  |
| <a href="#">AMK58_28105</a> | <a href="#">no KO assigned   (GenBank) hypothetical protein</a>                                                      | Hypothetical                        | 30.114  | 40.555  | 37.943  | 187.316  | 0.000 | 0.114  |
| <a href="#">AMK58_28110</a> | <a href="#">no KO assigned   (GenBank) hypothetical protein</a>                                                      | Hypothetical                        | 3.765   | 6.298   | 6.443   | 135.155  | 0.000 | 0.000  |
| <a href="#">AMK58_28115</a> | <a href="#">K07497 putative transposase   (GenBank) hypothetical protein</a>                                         | Genetic Information Processing      | 5.228   | 9.316   | 9.157   | 114.636  | 0.000 | 0.170  |
| <a href="#">AMK58_28120</a> | <a href="#">no KO assigned   (GenBank) hypothetical protein</a>                                                      | Hypothetical                        | 4.426   | 2.333   | 5.075   | 50.574   | 0.000 | 0.000  |
| <a href="#">AMK58_28125</a> | <a href="#">no KO assigned   (GenBank) hypothetical protein</a>                                                      | Hypothetical                        | 4.283   | 5.204   | 8.075   | 129.710  | 0.000 | 0.000  |
| <a href="#">AMK58_28130</a> | <a href="#">no KO assigned   (GenBank) hypothetical protein</a>                                                      | Hypothetical                        | 4.805   | 5.741   | 6.091   | 90.532   | 0.000 | 0.000  |
| <a href="#">AMK58_28135</a> | <a href="#">no KO assigned   (GenBank) hypothetical protein</a>                                                      | Hypothetical                        | 10.158  | 12.550  | 12.638  | 183.312  | 0.000 | 0.032  |

|                             |                                                                                                                                                                                                                 |                                |         |         |         |         |         |         |
|-----------------------------|-----------------------------------------------------------------------------------------------------------------------------------------------------------------------------------------------------------------|--------------------------------|---------|---------|---------|---------|---------|---------|
| <a href="#">AMK58_28140</a> | <a href="#">no KO assigned   (GenBank) hypothetical protein</a>                                                                                                                                                 | Hypothetical                   | 8.584   | 9.185   | 15.836  | 181.408 | 0.000   | 0.000   |
| <a href="#">AMK58_28145</a> | <a href="#">no KO assigned   (GenBank) hypothetical protein</a>                                                                                                                                                 | Hypothetical                   | 12.055  | 6.263   | 16.944  | 103.209 | 0.000   | 0.000   |
| <a href="#">AMK58_28150</a> | <a href="#">no KO assigned   (GenBank) hypothetical protein</a>                                                                                                                                                 | Hypothetical                   | 93.401  | 86.114  | 129.920 | 139.789 | 0.000   | 0.535   |
| <a href="#">AMK58_28155</a> | <a href="#">no KO assigned   (GenBank) hypothetical protein</a>                                                                                                                                                 | Hypothetical                   | 20.737  | 18.650  | 20.141  | 199.820 | 130.830 | 194.146 |
| <a href="#">AMK58_28160</a> | <a href="#">K13953 alcohol dehydrogenase, propanol-preferring [EC:1.1.1.1]   (GenBank) alcohol dehydrogenase</a>                                                                                                | Metabolism                     | 41.778  | 45.254  | 44.787  | 266.663 | 270.191 | 193.042 |
| <a href="#">AMK58_28165</a> | <a href="#">no KO assigned   (GenBank) hypothetical protein</a>                                                                                                                                                 | Hypothetical                   | 3.759   | 7.683   | 6.678   | 115.677 | 1.001   | 8.255   |
| <a href="#">AMK58_28170</a> | <a href="#">K03315 Na<sup>+</sup>-H<sup>+</sup> antiporter, NhaC family   (GenBank) sodium/proton antiporter</a>                                                                                                | Transport: Ion                 | 4.502   | 4.803   | 5.504   | 169.186 | 0.000   | 0.149   |
| <a href="#">AMK58_28175</a> | <a href="#">K00926 carbamate kinase [EC:2.7.2.2]   (GenBank) carbamate kinase</a>                                                                                                                               | Metabolism                     | 9.265   | 9.857   | 12.550  | 231.378 | 0.000   | 0.000   |
| <a href="#">AMK58_28180</a> | <a href="#">K00611 ornithine carbamoyltransferase [EC:2.1.3.3]   (GenBank) ornithine carbamoyltransferase</a>                                                                                                   | Biosynthesis: Amino Acid       | 9.999   | 15.115  | 14.433  | 110.545 | 0.000   | 0.223   |
| <a href="#">AMK58_28185</a> | <a href="#">K01478 arginine deiminase [EC:3.5.3.6]   (GenBank) arginine deiminase</a>                                                                                                                           | Metabolism: Amino Acid         | 8.367   | 8.233   | 13.384  | 122.101 | 0.000   | 0.183   |
| <a href="#">AMK58_28190</a> | <a href="#">K03758 arginine/ornithine antiporter / lysine permease   (GenBank) arginine-ornithine antiporter</a>                                                                                                | Transport: Amino Acid          | 11.075  | 7.018   | 14.520  | 116.554 | 0.000   | 0.078   |
| <a href="#">AMK58_28195</a> | <a href="#">no KO assigned   (GenBank) hypothetical protein</a>                                                                                                                                                 | Hypothetical                   | 39.097  | 35.163  | 44.768  | 116.571 | 0.000   | 0.000   |
| <a href="#">AMK58_28200</a> | <a href="#">no KO assigned   (GenBank) hypothetical protein</a>                                                                                                                                                 | Hypothetical                   | 5.222   | 4.237   | 8.888   | 174.622 | 0.000   | 0.060   |
| <a href="#">AMK58_28205</a> | <a href="#">no KO assigned   (GenBank) hypothetical protein</a>                                                                                                                                                 | Hypothetical                   | 13.986  | 7.162   | 12.918  | 123.111 | 0.000   | 0.000   |
| <a href="#">AMK58_28210</a> | <a href="#">no KO assigned   (GenBank) hypothetical protein</a>                                                                                                                                                 | Hypothetical                   | 6.998   | 9.164   | 12.487  | 83.982  | 0.000   | 0.000   |
| <a href="#">AMK58_28215</a> | <a href="#">K02778 PTS system, glucose-specific IIB component [EC:2.7.1.1991] K02779 PTS system, glucose-specific IICB component [EC:2.7.1.1992]   (GenBank) PTS system, glucose-specific IIB component</a>     | Metabolism: Carbohydrates      | 6.501   | 6.473   | 14.293  | 188.128 | 0.000   | 0.063   |
| <a href="#">AMK58_28220</a> | <a href="#">no KO assigned   (GenBank) PTS sugar transporter</a>                                                                                                                                                | Transport: Sugar               | 9.547   | 8.642   | 13.295  | 215.214 | 0.000   | 0.089   |
| <a href="#">AMK58_28225</a> | <a href="#">K16044 scyllo-inositol 2-dehydrogenase (NADP+) [EC:1.1.1.371]   (GenBank) oxidoreductase</a>                                                                                                        | Metabolism: Carbohydrates      | 14.430  | 23.131  | 20.637  | 163.129 | 0.000   | 0.000   |
| <a href="#">AMK58_28230</a> | <a href="#">K16370 6-phosphofructokinase 2 [EC:2.7.1.1]   (GenBank) 1-phosphofructokinase</a>                                                                                                                   | Metabolism: Carbohydrates      | 23.304  | 30.334  | 31.936  | 133.411 | 0.000   | 0.121   |
| <a href="#">AMK58_28235</a> | <a href="#">no KO assigned   (GenBank) hypothetical protein</a>                                                                                                                                                 | Hypothetical                   | 37.369  | 17.861  | 42.163  | 90.771  | 0.000   | 0.462   |
| <a href="#">AMK58_28240</a> | <a href="#">no KO assigned   (GenBank) pseudogene</a>                                                                                                                                                           | Pseudogene                     | 1.020   | 2.611   | 5.126   | 197.316 | 0.000   | 0.135   |
| <a href="#">AMK58_28245</a> | <a href="#">K03797 carboxyl-terminal processing protease [EC:3.4.21.102]   (GenBank) carboxyl-terminal protease</a>                                                                                             | Hydrolase                      | 5.449   | 8.139   | 7.772   | 110.975 | 0.000   | 0.158   |
| <a href="#">AMK58_28250</a> | <a href="#">no KO assigned   (GenBank) pseudogene</a>                                                                                                                                                           | Pseudogene                     | 9.539   | 10.522  | 13.256  | 251.634 | 0.000   | 0.136   |
| <a href="#">AMK58_28255</a> | <a href="#">no KO assigned   (GenBank) hypothetical protein</a>                                                                                                                                                 | Hypothetical                   | 14.294  | 10.047  | 15.722  | 79.216  | 0.000   | 0.260   |
| <a href="#">AMK58_28260</a> | <a href="#">no KO assigned   (GenBank) hypothetical protein</a>                                                                                                                                                 | Hypothetical                   | 26.822  | 28.455  | 27.648  | 59.435  | 0.000   | 0.465   |
| <a href="#">AMK58_28265</a> | <a href="#">no KO assigned   (GenBank) hypothetical protein</a>                                                                                                                                                 | Hypothetical                   | 64.979  | 98.570  | 75.298  | 69.363  | 0.000   | 0.471   |
| <a href="#">AMK58_28270</a> | <a href="#">no KO assigned   (GenBank) hypothetical protein</a>                                                                                                                                                 | Hypothetical                   | 14.314  | 11.878  | 16.824  | 137.419 | 0.000   | 0.000   |
| <a href="#">AMK58_28275</a> | <a href="#">K01034 acetate CoA/acetate CoA-transferase alpha subunit [EC:2.8.3.8] K01035 acetate CoA/acetate CoA-transferase beta subunit [EC:2.8.3.8]   (GenBank) acetyl-CoA synthetase (acetate-forming)</a>  | Metabolism: Carbohydrates      | 7.853   | 7.637   | 8.508   | 51.371  | 0.000   | 0.169   |
| <a href="#">AMK58_28280</a> | <a href="#">K01035 acetate CoA/acetate CoA-transferase beta subunit [EC:2.8.3.8] K01034 acetate CoA/acetate CoA-transferase alpha subunit [EC:2.8.3.8]   (GenBank) acetate CoA synthetase (acetate-forming)</a> | Metabolism                     | 10.180  | 13.033  | 11.408  | 128.093 | 0.000   | 0.169   |
| <a href="#">AMK58_28285</a> | <a href="#">K02557 chemotaxis protein MotB   (GenBank) hypothetical protein</a>                                                                                                                                 | Chemotaxis                     | 9.330   | 15.556  | 11.553  | 144.165 | 0.000   | 0.201   |
| <a href="#">AMK58_28290</a> | <a href="#">no KO assigned   (GenBank) inosine-5-monophosphate dehydrogenase</a>                                                                                                                                | Metabolism                     | 6.054   | 13.778  | 7.401   | 65.261  | 0.000   | 0.000   |
| <a href="#">AMK58_28295</a> | <a href="#">no KO assigned   (GenBank) hypothetical protein</a>                                                                                                                                                 | Hypothetical                   | 14.072  | 15.070  | 19.565  | 259.284 | 0.000   | 0.000   |
| <a href="#">AMK58_28300</a> | <a href="#">no KO assigned   (GenBank) hypothetical protein</a>                                                                                                                                                 | Hypothetical                   | 10.598  | 23.418  | 19.048  | 148.962 | 0.000   | 0.000   |
| <a href="#">AMK58_28305</a> | <a href="#">no KO assigned   (GenBank) hypothetical protein</a>                                                                                                                                                 | Hypothetical                   | 19.555  | 34.801  | 23.868  | 124.658 | 0.000   | 0.000   |
| <a href="#">AMK58_28310</a> | <a href="#">K07497 putative transposase   (GenBank) hypothetical protein</a>                                                                                                                                    | Genetic Information Processing | 35.682  | 59.313  | 43.845  | 142.405 | 0.000   | 0.000   |
| <a href="#">AMK58_28315</a> | <a href="#">no KO assigned   (GenBank) hypothetical protein</a>                                                                                                                                                 | Hypothetical                   | 0.835   | 3.326   | 1.852   | 85.753  | 0.000   | 0.000   |
| <a href="#">AMK58_28320</a> | <a href="#">no KO assigned   (GenBank) Sulphatase-modifying factor protein</a>                                                                                                                                  | No COG                         | 14.268  | 16.237  | 16.925  | 135.974 | 0.000   | 0.000   |
| <a href="#">AMK58_28325</a> | <a href="#">no KO assigned   (GenBank) pseudogene</a>                                                                                                                                                           | Pseudogene                     | 11.007  | 16.202  | 12.285  | 200.008 | 0.000   | 0.296   |
| <a href="#">AMK58_28330</a> | <a href="#">no KO assigned   (GenBank) hypothetical protein</a>                                                                                                                                                 | Hypothetical                   | 0.364   | 2.172   | 3.803   | 217.222 | 0.000   | 0.000   |
| <a href="#">AMK58_28335</a> | <a href="#">no KO assigned   (GenBank) hypothetical protein</a>                                                                                                                                                 | Hypothetical                   | 0.000   | 0.000   | 6.140   | 303.828 | 0.000   | 0.000   |
| <a href="#">AMK58_28340</a> | <a href="#">no KO assigned   (GenBank) AAA family ATPase</a>                                                                                                                                                    | Energy                         | 1.597   | 4.337   | 4.693   | 168.409 | 0.000   | 0.000   |
| <a href="#">AMK58_28345</a> | <a href="#">no KO assigned   (GenBank) hypothetical protein</a>                                                                                                                                                 | Hypothetical                   | 0.700   | 0.000   | 4.658   | 179.061 | 0.000   | 0.000   |
| <a href="#">AMK58_28350</a> | <a href="#">no KO assigned   (GenBank) integrase</a>                                                                                                                                                            | Genetic Information Processing | 1.603   | 1.690   | 3.048   | 155.365 | 0.000   | 0.000   |
| <a href="#">AMK58_28355</a> | <a href="#">no KO assigned   (GenBank) AAA family ATPase</a>                                                                                                                                                    | Energy                         | 8.321   | 10.772  | 12.923  | 186.337 | 0.000   | 0.129   |
| <a href="#">AMK58_28360</a> | <a href="#">no KO assigned   (GenBank) hypothetical protein</a>                                                                                                                                                 | Hypothetical                   | 2.446   | 3.653   | 8.721   | 379.253 | 0.687   | 0.567   |
| <a href="#">AMK58_28365</a> | <a href="#">K09803 uncharacterized protein   (GenBank) hypothetical protein</a>                                                                                                                                 | Hypothetical                   | 358.690 | 384.706 | 342.339 | 103.872 | 0.000   | 0.420   |
| <a href="#">AMK58_28370</a> | <a href="#">K07726 putative transcriptional regulator   (GenBank) hypothetical protein</a>                                                                                                                      | Transcription                  | 237.986 | 294.700 | 266.479 | 93.965  | 0.000   | 0.000   |
| <a href="#">AMK58_28375</a> | <a href="#">no KO assigned   (GenBank) hypothetical protein</a>                                                                                                                                                 | Hypothetical                   | 132.258 | 174.303 | 141.009 | 311.996 | 0.000   | 0.000   |
| <a href="#">AMK58_28380</a> | <a href="#">no KO assigned   (GenBank) pseudogene</a>                                                                                                                                                           | Pseudogene                     | 17.624  | 16.847  | 15.249  | 131.496 | 23.772  | 51.151  |
| <a href="#">AMK58_28385</a> | <a href="#">no KO assigned   (GenBank) hypothetical protein</a>                                                                                                                                                 | Hypothetical                   | 143.712 | 170.019 | 162.347 | 123.892 | 0.000   | 0.240   |
| <a href="#">AMK58_28390</a> | <a href="#">K03496 chromosome partitioning protein   (GenBank) hypothetical protein</a>                                                                                                                         | Cell Cycle/Shape/Homeostasis   | 211.320 | 221.025 | 230.060 | 108.875 | 0.000   | 0.000   |
| <a href="#">AMK58_28395</a> | <a href="#">no KO assigned   (GenBank) hypothetical protein</a>                                                                                                                                                 | Hypothetical                   | 119.327 | 118.661 | 149.715 | 207.734 | 0.000   | 0.000   |
| <a href="#">AMK58_28400</a> | <a href="#">no KO assigned   (GenBank) hypothetical protein</a>                                                                                                                                                 | Hypothetical                   | 84.918  | 93.557  | 93.088  | 59.860  | 0.000   | 0.000   |
| <a href="#">AMK58_28405</a> | <a href="#">K07483 transposase   (GenBank) hypothetical protein</a>                                                                                                                                             | Genetic Information Processing | 2.736   | 4.087   | 9.431   | 298.715 | 0.000   | 0.000   |
| <a href="#">AMK58_28410</a> | <a href="#">no KO assigned   (GenBank) hypothetical protein</a>                                                                                                                                                 | Hypothetical                   | 0.917   | 2.740   | 3.052   | 107.510 | 0.000   | 0.851   |
| <a href="#">AMK58_28415</a> | <a href="#">no KO assigned   (GenBank) hypothetical protein</a>                                                                                                                                                 | Hypothetical                   | 0.216   | 2.579   | 4.720   | 187.916 | 0.000   | 0.000   |
| <a href="#">AMK58_28420</a> | <a href="#">no KO assigned   (GenBank) hypothetical protein</a>                                                                                                                                                 | Hypothetical                   | 0.000   | 0.000   | 3.101   | 185.667 | 0.000   | 0.000   |
| <a href="#">AMK58_28425</a> | <a href="#">K18144 two-component system, OmpR family, response regulator AdeR   (GenBank) two-component system, OmpR family, response regulator AdeR</a>                                                        | Signal Transduction            | 7.194   | 6.290   | 8.842   | 147.378 | 0.000   | 0.163   |
| <a href="#">AMK58_28430</a> | <a href="#">K18143 two-component system, OmpR family, sensor histidine kinase AdeS [EC:2.7.13.1]   (GenBank) histidine kinase</a>                                                                               | Signal Transduction            | 6.243   | 4.663   | 8.268   | 176.224 | 0.000   | 0.207   |
| <a href="#">AMK58_28435</a> | <a href="#">K06147 ATP-binding cassette, subfamily B, bacterial   (GenBank) multidrug ABC transporter ATP-binding domain</a>                                                                                    | Membrane Transport             | 2.160   | 2.016   | 3.786   | 73.409  | 0.000   | 0.063   |
| <a href="#">AMK58_28440</a> | <a href="#">K18145 membrane fusion protein, multidrug efflux system   (GenBank) RND transporter</a>                                                                                                             | Membrane Transport             | 14.676  | 18.162  | 23.522  | 197.853 | 0.000   | 0.097   |
| <a href="#">AMK58_28445</a> | <a href="#">no KO assigned   (GenBank) pseudogene</a>                                                                                                                                                           | Pseudogene                     | 1.379   | 2.197   | 2.797   | 104.676 | 0.000   | 0.170   |
| <a href="#">AMK58_28450</a> | <a href="#">no KO assigned   (GenBank) TetR family transcriptional regulator</a>                                                                                                                                | Transcription                  | 11.974  | 25.172  | 22.560  | 167.830 | 0.000   | 0.000   |
| <a href="#">AMK58_28455</a> | <a href="#">no KO assigned   (GenBank) pseudogene</a>                                                                                                                                                           | Pseudogene                     | 19.757  | 16.646  | 21.996  | 195.664 | 0.000   | 0.000   |
| <a href="#">AMK58_28460</a> | <a href="#">no KO assigned   (GenBank) pseudogene</a>                                                                                                                                                           | Pseudogene                     | 12.370  | 11.944  | 14.731  | 180.430 | 0.000   | 0.116   |
| <a href="#">AMK58_28465</a> | <a href="#">no KO assigned   (GenBank) hypothetical protein</a>                                                                                                                                                 | Hypothetical                   | 10.051  | 17.553  | 15.437  | 54.269  | 0.000   | 0.143   |
| <a href="#">AMK58_28470</a> | <a href="#">no KO assigned   (GenBank) pseudogene</a>                                                                                                                                                           | Pseudogene                     | 13.469  | 16.989  | 15.368  | 154.167 | 0.000   | 0.000   |



|                             |                                                                                                                     |                                     |         |         |         |         |         |         |
|-----------------------------|---------------------------------------------------------------------------------------------------------------------|-------------------------------------|---------|---------|---------|---------|---------|---------|
| <a href="#">AMK58_28475</a> | <a href="#">K15864 nitrite reductase (NO-forming) / hydroxylamine reductase [EC:1.7.2.1 1.7.99.11] (GenBank) ni</a> | Nitrogen                            | 6.862   | 11.020  | 12.838  | 55.643  | 0.000   | 0.068   |
| <a href="#">AMK58_28480</a> | <a href="#">no KO assigned   (GenBank) hypothetical protein</a>                                                     | Hypothetical                        | 3.208   | 4.011   | 5.603   | 139.502 | 0.000   | 0.000   |
| <a href="#">AMK58_28485</a> | <a href="#">no KO assigned   (GenBank) hypothetical protein</a>                                                     | Hypothetical                        | 6.294   | 13.273  | 11.618  | 203.352 | 0.000   | 0.000   |
| <a href="#">AMK58_28490</a> | <a href="#">no KO assigned   (GenBank) cytochrome C oxidase Cbb3</a>                                                | Energy                              | 3.836   | 5.042   | 5.253   | 103.088 | 0.000   | 0.071   |
| <a href="#">AMK58_28495</a> | <a href="#">no KO assigned   (GenBank) hypothetical protein</a>                                                     | Hypothetical                        | 10.232  | 27.168  | 16.214  | 160.663 | 0.000   | 0.000   |
| <a href="#">AMK58_28500</a> | <a href="#">K13796 tricarballoylate dehydrogenase   (GenBank) hypothetical protein</a>                              | Dehydrogenase                       | 4.314   | 4.296   | 7.093   | 176.273 | 0.000   | 0.083   |
| <a href="#">AMK58_28505</a> | <a href="#">K13795 citrate/tricarballoylate utilization protein   (GenBank) hypothetical protein</a>                | Enzyme                              | 8.735   | 9.909   | 12.300  | 149.448 | 0.000   | 0.000   |
| <a href="#">AMK58_28510</a> | <a href="#">no KO assigned   (GenBank) ferredoxin</a>                                                               | Ferredoxin                          | 1.511   | 6.373   | 4.649   | 98.598  | 0.000   | 0.165   |
| <a href="#">AMK58_28515</a> | <a href="#">K07243 high-affinity iron transporter   (GenBank) hypothetical protein</a>                              | Transport: Metal                    | 0.669   | 1.332   | 2.014   | 157.258 | 0.000   | 0.000   |
| <a href="#">AMK58_28520</a> | <a href="#">no KO assigned   (GenBank) transposase</a>                                                              | Genetic Information Processing      | 0.904   | 0.000   | 1.182   | 10.600  | 0.000   | 0.000   |
| <a href="#">AMK58_28525</a> | <a href="#">no KO assigned   (GenBank) hypothetical protein</a>                                                     | Hypothetical                        | 8.670   | 16.075  | 11.370  | 153.776 | 0.000   | 0.000   |
| <a href="#">AMK58_28530</a> | <a href="#">K07230 periplasmic iron binding protein   (GenBank) hypothetical protein</a>                            | Transport: Metal                    | 33.632  | 24.943  | 31.536  | 143.855 | 0.000   | 0.430   |
| <a href="#">AMK58_28535</a> | <a href="#">no KO assigned   (GenBank) hypothetical protein</a>                                                     | Hypothetical                        | 1.596   | 0.000   | 2.602   | 118.814 | 0.000   | 0.423   |
| <a href="#">AMK58_28540</a> | <a href="#">K01719 uroporphyrinogen-III synthase [EC:4.2.1.75]   (GenBank) hypothetical protein</a>                 | Metabolism: Co-Factors and Vitamins | 2.894   | 6.724   | 5.198   | 200.525 | 0.000   | 0.149   |
| <a href="#">AMK58_28545</a> | <a href="#">K01749 hydroxymethylbilane synthase [EC:2.5.1.61]   (GenBank) porphobilinogen deaminase</a>             | Metabolism: Co-Factors and Vitamins | 5.896   | 8.611   | 9.095   | 157.622 | 0.000   | 0.000   |
| <a href="#">AMK58_28550</a> | <a href="#">no KO assigned   (GenBank) hypothetical protein</a>                                                     | Hypothetical                        | 1.755   | 4.765   | 4.702   | 247.873 | 0.000   | 0.000   |
| <a href="#">AMK58_28555</a> | <a href="#">no KO assigned   (GenBank) heme d1 biosynthesis radical SAM protein NirJ</a>                            | Enzyme                              | 2.259   | 3.681   | 3.320   | 177.868 | 0.000   | 0.286   |
| <a href="#">AMK58_28560</a> | <a href="#">no KO assigned   (GenBank) protein nirH</a>                                                             | No COG                              | 2.431   | 4.358   | 4.854   | 295.061 | 0.000   | 0.000   |
| <a href="#">AMK58_28565</a> | <a href="#">no KO assigned   (GenBank) protein nirG</a>                                                             | No COG                              | 1.091   | 4.888   | 4.148   | 191.774 | 0.000   | 0.000   |
| <a href="#">AMK58_28570</a> | <a href="#">no KO assigned   (GenBank) hypothetical protein</a>                                                     | Hypothetical                        | 3.068   | 8.460   | 6.283   | 234.585 | 0.000   | 0.000   |
| <a href="#">AMK58_28575</a> | <a href="#">no KO assigned   (GenBank) AsnC family transcriptional regulator</a>                                    | Transcription                       | 2.655   | 6.345   | 8.331   | 229.408 | 0.000   | 0.000   |
| <a href="#">AMK58_28580</a> | <a href="#">K19345 protein NirF   (GenBank) protein nirF</a>                                                        | No COG                              | 5.368   | 7.127   | 8.034   | 195.608 | 0.000   | 0.092   |
| <a href="#">AMK58_28585</a> | <a href="#">K19344 cytochrome c55X   (GenBank) hypothetical protein</a>                                             | Energy                              | 3.844   | 4.593   | 7.309   | 277.003 | 0.000   | 0.000   |
| <a href="#">AMK58_28590</a> | <a href="#">K02302 uroporphyrin-III C-methyltransferase / precorrin-2 dehydrogenase / sirohdrochlorin ferrochel</a> | Metabolism: Co-Factors and Vitamins | 7.131   | 6.345   | 11.108  | 175.193 | 0.000   | 0.000   |
| <a href="#">AMK58_28595</a> | <a href="#">no KO assigned   (GenBank) hypothetical protein</a>                                                     | Hypothetical                        | 6.079   | 9.080   | 7.386   | 106.088 | 0.000   | 0.000   |
| <a href="#">AMK58_28600</a> | <a href="#">no KO assigned   (GenBank) hypothetical protein</a>                                                     | Hypothetical                        | 6.840   | 4.087   | 8.618   | 153.710 | 0.000   | 0.476   |
| <a href="#">AMK58_28605</a> | <a href="#">no KO assigned   (GenBank) hypothetical protein</a>                                                     | Hypothetical                        | 3.924   | 3.958   | 6.250   | 149.012 | 0.000   | 0.000   |
| <a href="#">AMK58_28610</a> | <a href="#">no KO assigned   (GenBank) transposase</a>                                                              | Genetic Information Processing      | 2.175   | 2.888   | 4.136   | 89.024  | 0.000   | 0.000   |
| <a href="#">AMK58_28615</a> | <a href="#">K00643 5-aminolevulinat synthase [EC:2.3.1.37]   (GenBank) 5-aminolevulinat svnthase</a>                | Metabolism: Co-Factors and Vitamins | 12.556  | 14.289  | 10.801  | 146.301 | 0.336   | 0.000   |
| <a href="#">AMK58_28620</a> | <a href="#">no KO assigned   (GenBank) hypothetical protein</a>                                                     | Hypothetical                        | 23.194  | 18.015  | 13.453  | 111.542 | 0.000   | 0.430   |
| <a href="#">AMK58_28625</a> | <a href="#">no KO assigned   (GenBank) hypothetical protein</a>                                                     | Hypothetical                        | 4.371   | 5.000   | 7.250   | 145.369 | 0.000   | 0.086   |
| <a href="#">AMK58_28630</a> | <a href="#">no KO assigned   (GenBank) hypothetical protein</a>                                                     | Hypothetical                        | 2.070   | 3.091   | 6.395   | 288.330 | 0.000   | 0.480   |
| <a href="#">AMK58_28635</a> | <a href="#">K04561 nitric oxide reductase subunit B [EC:1.7.2.51]   (GenBank) nitric oxide reductase</a>            | Nitrogen                            | 13.870  | 11.227  | 14.720  | 148.281 | 83.084  | 212.673 |
| <a href="#">AMK58_28640</a> | <a href="#">K02305 nitric oxide reductase subunit C   (GenBank) cytochrome C</a>                                    | Nitrogen                            | 7.751   | 15.968  | 10.419  | 318.285 | 29.442  | 80.051  |
| <a href="#">AMK58_28645</a> | <a href="#">K07498 putative transposase   (GenBank) hypothetical protein</a>                                        | Genetic Information Processing      | 52.398  | 64.839  | 59.011  | 188.535 | 50.130  | 97.804  |
| <a href="#">AMK58_28650</a> | <a href="#">no KO assigned   (GenBank) CoA-binding protein</a>                                                      | No COG                              | 9.991   | 11.067  | 14.090  | 86.319  | 0.000   | 0.104   |
| <a href="#">AMK58_28655</a> | <a href="#">no KO assigned   (GenBank) formyl-coenzym A transferase</a>                                             | Transferase                         | 2.937   | 4.528   | 4.324   | 93.530  | 0.000   | 0.000   |
| <a href="#">AMK58_28660</a> | <a href="#">no KO assigned   (GenBank) lipase</a>                                                                   | Enzyme                              | 94.613  | 101.224 | 97.923  | 124.955 | 0.000   | 0.353   |
| <a href="#">AMK58_28665</a> | <a href="#">no KO assigned   (GenBank) hypothetical protein</a>                                                     | Hypothetical                        | 49.592  | 45.248  | 59.384  | 56.147  | 0.000   | 0.000   |
| <a href="#">AMK58_28670</a> | <a href="#">no KO assigned   (GenBank) hypothetical protein</a>                                                     | Hypothetical                        | 116.090 | 111.682 | 111.746 | 152.940 | 0.970   | 7.822   |
| <a href="#">AMK58_28675</a> | <a href="#">K05916 nitric oxide dioxygenase [EC:1.14.12.17]   (GenBank) dihydropteridine reductase</a>              | Nitrogen                            | 9.670   | 4.716   | 12.103  | 142.755 | 0.000   | 0.091   |
| <a href="#">AMK58_28680</a> | <a href="#">no KO assigned   (GenBank) hypothetical protein</a>                                                     | Hypothetical                        | 63.858  | 51.886  | 65.088  | 108.808 | 0.000   | 0.000   |
| <a href="#">AMK58_28685</a> | <a href="#">no KO assigned   (GenBank) hypothetical protein</a>                                                     | Hypothetical                        | 71.603  | 70.002  | 81.697  | 91.266  | 0.000   | 0.000   |
| <a href="#">AMK58_28690</a> | <a href="#">no KO assigned   (GenBank) hypothetical protein</a>                                                     | Hypothetical                        | 17.040  | 25.719  | 32.915  | 276.797 | 0.000   | 0.166   |
| <a href="#">AMK58_28695</a> | <a href="#">K02448 nitric oxide reductase NorD protein   (GenBank) protein norD</a>                                 | Nitrogen                            | 3.226   | 2.646   | 7.458   | 104.396 | 0.000   | 0.000   |
| <a href="#">AMK58_28700</a> | <a href="#">K04748 nitric oxide reductase NorO protein   (GenBank) AAA family ATPase</a>                            | Nitrogen                            | 0.000   | 0.000   | 0.000   | 0.000   | 0.000   | 0.000   |
| <a href="#">AMK58_28705</a> | <a href="#">K04561 nitric oxide reductase subunit B [EC:1.7.2.51]   (GenBank) nitric oxide reductase</a>            | Nitrogen                            | 0.000   | 0.000   | 0.000   | 0.000   | 0.000   | 0.000   |
| <a href="#">AMK58_28710</a> | <a href="#">K02305 nitric oxide reductase subunit C   (GenBank) cytochrome C</a>                                    | Nitrogen                            | 0.000   | 0.000   | 0.000   | 0.000   | 0.000   | 0.000   |
| <a href="#">AMK58_28715</a> | <a href="#">no KO assigned   (GenBank) pseudogene</a>                                                               | Pseudogene                          | 0.000   | 0.000   | 0.000   | 0.000   | 0.000   | 0.000   |
| <a href="#">AMK58_28720</a> | <a href="#">no KO assigned   (GenBank) hypothetical protein</a>                                                     | Hypothetical                        | 0.000   | 0.000   | 0.000   | 0.000   | 0.000   | 0.000   |
| <a href="#">AMK58_28725</a> | <a href="#">no KO assigned   (GenBank) hypothetical protein</a>                                                     | Hypothetical                        | 0.000   | 0.000   | 0.000   | 0.000   | 0.000   | 0.000   |
| <a href="#">AMK58_28730</a> | <a href="#">no KO assigned   (GenBank) hypothetical protein</a>                                                     | Hypothetical                        | 0.000   | 0.000   | 0.000   | 0.000   | 0.000   | 0.000   |
| <a href="#">AMK58_28735</a> | <a href="#">no KO assigned   (GenBank) hypothetical protein</a>                                                     | Hypothetical                        | 0.000   | 0.000   | 0.000   | 0.000   | 0.000   | 0.000   |
| <a href="#">AMK58_28740</a> | <a href="#">no KO assigned   (GenBank) hypothetical protein</a>                                                     | Hypothetical                        | 0.000   | 0.000   | 0.000   | 0.000   | 0.000   | 0.000   |
| <a href="#">AMK58_28745</a> | <a href="#">no KO assigned   (GenBank) hypothetical protein</a>                                                     | Hypothetical                        | 0.000   | 0.000   | 0.000   | 0.000   | 0.000   | 0.000   |
| <a href="#">AMK58_28750</a> | <a href="#">no KO assigned   (GenBank) hypothetical protein</a>                                                     | Hypothetical                        | 0.000   | 0.000   | 0.000   | 0.000   | 0.000   | 0.000   |
| <a href="#">AMK58_28755</a> | <a href="#">no KO assigned   (GenBank) hypothetical protein</a>                                                     | Hypothetical                        | 0.000   | 0.000   | 0.000   | 0.000   | 0.000   | 0.000   |
| <a href="#">AMK58_28760</a> | <a href="#">no KO assigned   (GenBank) hypothetical protein</a>                                                     | Hypothetical                        | 88.892  | 99.539  | 101.836 | 289.162 | 154.239 | 111.598 |
| <a href="#">AMK58_28765</a> | <a href="#">no KO assigned   (GenBank) hypothetical protein</a>                                                     | Hypothetical                        | 157.573 | 178.218 | 158.275 | 449.263 | 108.875 | 503.424 |
| <a href="#">AMK58_28770</a> | <a href="#">no KO assigned   (GenBank) pseudogene</a>                                                               | Pseudogene                          | 50.540  | 76.317  | 63.632  | 557.979 | 110.654 | 426.290 |
| <a href="#">AMK58_28775</a> | <a href="#">no KO assigned   (GenBank) hypothetical protein</a>                                                     | Hypothetical                        | 6.616   | 11.858  | 5.976   | 215.362 | 98.537  | 409.815 |
| <a href="#">AMK58_28780</a> | <a href="#">no KO assigned   (GenBank) hypothetical protein</a>                                                     | Hypothetical                        | 10.208  | 5.673   | 10.383  | 192.397 | 78.987  | 592.167 |
| <a href="#">AMK58_28785</a> | <a href="#">K02474 UDP-N-acetyl-D-galactosamine dehydrogenase [EC:1.1.1.-]   (GenBank) GDP-mannose dehydro</a>      | Metabolism                          | 73.413  | 72.727  | 72.472  | 224.652 | 98.728  | 390.903 |
| <a href="#">AMK58_28790</a> | <a href="#">no KO assigned   (GenBank) pseudogene</a>                                                               | Pseudogene                          | 24.888  | 40.186  | 28.780  | 237.873 | 86.948  | 724.139 |
| <a href="#">AMK58_28795</a> | <a href="#">no KO assigned   (GenBank) pseudogene</a>                                                               | Pseudogene                          | 50.707  | 61.825  | 55.100  | 275.855 | 157.031 | 861.694 |
| <a href="#">AMK58_28800</a> | <a href="#">no KO assigned   (GenBank) pseudogene</a>                                                               | Pseudogene                          | 26.675  | 24.836  | 29.315  | 120.653 | 165.687 | 396.718 |
| <a href="#">AMK58_28805</a> | <a href="#">no KO assigned   (GenBank) glycosyl transferase</a>                                                     | Glycosyl Transferase                | 485.359 | 389.686 | 450.708 | 276.317 | 162.945 | 366.143 |

|             |                                                                                                                                                             |                                     |          |          |          |         |         |         |
|-------------|-------------------------------------------------------------------------------------------------------------------------------------------------------------|-------------------------------------|----------|----------|----------|---------|---------|---------|
| AMK58_28810 | <a href="#">K07027 glycosyltransferase 2 family protein I (GenBank) hypothetical protein</a>                                                                | glycosyltransferase                 | 337.096  | 316.381  | 332.159  | 348.122 | 311.651 | 269.966 |
| AMK58_28815 | <a href="#">no KO assigned I (GenBank) hypothetical protein</a>                                                                                             | Hypothetical                        | 56.144   | 59.794   | 63.826   | 474.786 | 160.422 | 373.855 |
| AMK58_28820 | <a href="#">no KO assigned I (GenBank) hypothetical protein</a>                                                                                             | Hypothetical                        | 23.506   | 21.606   | 29.983   | 299.569 | 101.135 | 168.539 |
| AMK58_28825 | <a href="#">K01784 UDP-glucose 4-epimerase [EC:5.1.3.21] (GenBank) UDP-glucose 4-epimerase</a>                                                              | Metabolism                          | 98.178   | 96.033   | 105.113  | 357.367 | 187.177 | 293.810 |
| AMK58_28830 | <a href="#">no KO assigned I (GenBank) hypothetical protein</a>                                                                                             | Hypothetical                        | 113.065  | 111.656  | 114.912  | 416.402 | 91.322  | 233.492 |
| AMK58_28835 | <a href="#">no KO assigned I (GenBank) hypothetical protein</a>                                                                                             | Hypothetical                        | 104.017  | 102.575  | 105.897  | 337.663 | 48.497  | 335.672 |
| AMK58_28840 | <a href="#">no KO assigned I (GenBank) hypothetical protein</a>                                                                                             | Hypothetical                        | 147.019  | 187.885  | 146.017  | 438.815 | 65.101  | 571.312 |
| AMK58_28845 | <a href="#">no KO assigned I (GenBank) hypothetical protein</a>                                                                                             | Hypothetical                        | 3350.532 | 3997.491 | 3923.890 | 145.469 | 197.872 | 531.804 |
| AMK58_28850 | <a href="#">no KO assigned I (GenBank) hypothetical protein</a>                                                                                             | Hypothetical                        | 703.497  | 654.537  | 722.840  | 217.391 | 242.743 | 542.835 |
| AMK58_28855 | <a href="#">K09691 lipopolysaccharide transport system ATP-binding protein I (GenBank) hypothetical protein</a>                                             | Transport: polysacchharide          | 338.022  | 335.807  | 353.097  | 187.013 | 144.757 | 397.682 |
| AMK58_28860 | <a href="#">no KO assigned I (GenBank) hypothetical protein</a>                                                                                             | Hypothetical                        | 252.265  | 238.035  | 245.548  | 135.777 | 106.276 | 415.962 |
| AMK58_28865 | <a href="#">K09690 lipopolysaccharide transport system permease protein I (GenBank) sugar ABC transporter permease</a>                                      | Transport: polysacchharide          | 115.952  | 95.520   | 86.634   | 168.216 | 128.067 | 461.169 |
| AMK58_28870 | <a href="#">no KO assigned I (GenBank) hypothetical protein</a>                                                                                             | Hypothetical                        | 180.163  | 182.504  | 170.346  | 172.341 | 167.422 | 458.900 |
| AMK58_28875 | <a href="#">no KO assigned I (GenBank) hypothetical protein</a>                                                                                             | Hypothetical                        | 7503.460 | 6627.596 | 6622.080 | 275.353 | 89.671  | 305.387 |
| AMK58_28880 | <a href="#">no KO assigned I (GenBank) hypothetical protein</a>                                                                                             | Hypothetical                        | 65.983   | 53.850   | 57.353   | 386.019 | 23.803  | 289.474 |
| AMK58_28885 | <a href="#">no KO assigned I (GenBank) SAM-dependent methyltransferase</a>                                                                                  | methyltransferase                   | 172.422  | 177.855  | 174.578  | 342.036 | 119.475 | 371.639 |
| AMK58_28890 | <a href="#">no KO assigned I (GenBank) glycosyl transferase family 1</a>                                                                                    | Glycosyl transferase                | 70.142   | 57.961   | 57.467   | 194.805 | 94.327  | 453.225 |
| AMK58_28895 | <a href="#">no KO assigned I (GenBank) hypothetical protein</a>                                                                                             | Hypothetical                        | 43.007   | 42.359   | 48.003   | 418.197 | 51.933  | 440.987 |
| AMK58_28900 | <a href="#">K03271 D-sedoheptulose 7-phosphate isomerase [EC:5.3.1.281] (GenBank) phosphoheptose isomerase</a>                                              | Biosynthesis: polysacchharide       | 108.883  | 95.443   | 117.317  | 388.570 | 85.531  | 384.368 |
| AMK58_28905 | <a href="#">no KO assigned I (GenBank) hypothetical protein</a>                                                                                             | Biosynthesis: polysacchharide       | 63.883   | 85.745   | 82.697   | 447.963 | 57.979  | 347.516 |
| AMK58_28910 | <a href="#">no KO assigned I (GenBank) hypothetical protein</a>                                                                                             | Hypothetical                        | 26.328   | 33.632   | 49.984   | 292.584 | 84.304  | 455.744 |
| AMK58_28915 | <a href="#">no KO assigned I (GenBank) hypothetical protein</a>                                                                                             | Hypothetical                        | 142.009  | 149.571  | 148.567  | 298.642 | 98.492  | 241.150 |
| AMK58_28920 | <a href="#">K01790 dTDP-4-dehydroorhamnose 3,5-epimerase [EC:5.1.3.131] (GenBank) dTDP-4-dehydroorhamnose 3,5-epimerase</a>                                 | Metabolism                          | 253.527  | 234.706  | 245.138  | 251.906 | 120.167 | 529.499 |
| AMK58_28925 | <a href="#">K01710 dTDP-glucose 4,6-dehydratase [EC:4.2.1.461] (GenBank) dTDP-glucose 4,6-dehydratase</a>                                                   | Metabolism                          | 263.794  | 202.055  | 221.234  | 285.713 | 124.055 | 406.324 |
| AMK58_28930 | <a href="#">K00067 dTDP-4-dehydroorhamnose reductase [EC:1.1.1.133] (GenBank) dTDP-4-dehydroorhamnose reductase</a>                                         | Metabolism                          | 68.218   | 60.669   | 64.368   | 323.500 | 58.681  | 157.660 |
| AMK58_28935 | <a href="#">K00973 glucose-1-phosphate thymidyltransferase [EC:2.7.7.241] (GenBank) glucose-1-phosphate thymidyltransferase</a>                             | Biosynthesis: secondary metabolites | 399.393  | 325.385  | 329.291  | 171.726 | 127.146 | 447.136 |
| AMK58_28940 | <a href="#">K07126 uncharacterized protein I (GenBank) hypothetical protein</a>                                                                             | Hypothetical                        | 119.231  | 135.603  | 141.825  | 352.020 | 131.947 | 222.040 |
| AMK58_28945 | <a href="#">no KO assigned I (GenBank) secretion protein</a>                                                                                                | secretion system                    | 536.774  | 540.255  | 519.179  | 158.486 | 200.585 | 344.161 |
| AMK58_28950 | <a href="#">no KO assigned I (GenBank) peptidase C39</a>                                                                                                    | peptidase                           | 712.058  | 606.352  | 675.745  | 171.897 | 217.457 | 424.448 |
| AMK58_28955 | <a href="#">no KO assigned I (GenBank) hypothetical protein</a>                                                                                             | Hypothetical                        | 107.332  | 96.655   | 104.864  | 128.164 | 124.752 | 348.584 |
| AMK58_28960 | <a href="#">K02377 GDP-L-fucose synthase [EC:1.1.1.2711] (GenBank) GDP-fucose synthetase</a>                                                                | Metabolism: Carbohydrate            | 134.363  | 98.506   | 122.723  | 170.097 | 124.061 | 278.620 |
| AMK58_28965 | <a href="#">K01990 ABC-2 type transport system ATP-binding protein I (GenBank) sugar ABC transporter ATP-binding protein</a>                                | Membrane Transport                  | 47.626   | 36.029   | 40.284   | 162.600 | 104.807 | 398.608 |
| AMK58_28970 | <a href="#">K09690 lipopolysaccharide transport system permease protein I (GenBank) ABC transporter permease</a>                                            | Transport: lipopolysaccharide       | 89.466   | 82.621   | 87.480   | 187.138 | 79.150  | 439.134 |
| AMK58_28975 | <a href="#">K01711 GDPmannose 4,6-dehydratase [EC:4.2.1.47] (GenBank) GDP-mannose 4,6 dehydratase</a>                                                       | Metabolism: Carbohydrate            | 77.468   | 62.706   | 74.964   | 186.957 | 88.060  | 442.822 |
| AMK58_28980 | <a href="#">K01711 GDPmannose 4,6-dehydratase [EC:4.2.1.47] (GenBank) GDP-mannose 4,6 dehydratase</a>                                                       | Metabolism: Carbohydrate            | 872.263  | 739.021  | 722.366  | 152.107 | 237.586 | 604.797 |
| AMK58_28985 | <a href="#">no KO assigned I (GenBank) hypothetical protein</a>                                                                                             | Hypothetical                        | 628.558  | 548.929  | 577.636  | 179.440 | 23.647  | 807.386 |
| AMK58_28990 | <a href="#">no KO assigned I (GenBank) hypothetical protein</a>                                                                                             | Hypothetical                        | 200.759  | 185.995  | 206.680  | 140.017 | 47.504  | 392.989 |
| AMK58_28995 | <a href="#">no KO assigned I (GenBank) hypothetical protein</a>                                                                                             | Hypothetical                        | 10.697   | 14.525   | 17.106   | 442.917 | 25.142  | 578.933 |
| AMK58_29000 | <a href="#">no KO assigned I (GenBank) hypothetical protein</a>                                                                                             | Hypothetical                        | 5.045    | 9.795    | 9.833    | 405.803 | 13.326  | 426.274 |
| AMK58_29005 | <a href="#">no KO assigned I (GenBank) hypothetical protein</a>                                                                                             | Hypothetical                        | 7.264    | 7.234    | 14.965   | 277.338 | 27.672  | 395.938 |
| AMK58_29010 | <a href="#">no KO assigned I (GenBank) hypothetical protein</a>                                                                                             | Hypothetical                        | 130.756  | 126.134  | 127.707  | 283.435 | 52.838  | 332.365 |
| AMK58_29015 | <a href="#">no KO assigned I (GenBank) hypothetical protein</a>                                                                                             | Hypothetical                        | 61.097   | 60.207   | 59.203   | 270.114 | 91.495  | 442.984 |
| AMK58_29020 | <a href="#">no KO assigned I (GenBank) hypothetical protein</a>                                                                                             | Hypothetical                        | 71.214   | 74.807   | 65.691   | 210.707 | 108.950 | 518.327 |
| AMK58_29025 | <a href="#">K16011 mannose-1-phosphate guanylyltransferase / mannose-6-phosphate isomerase [EC:2.7.13.5.3.1.8]</a>                                          | Metabolism: Carbohydrate            | 181.151  | 157.905  | 169.846  | 339.657 | 93.747  | 375.866 |
| AMK58_29030 | <a href="#">no KO assigned I (GenBank) hypothetical protein</a>                                                                                             | Hypothetical                        | 73.400   | 61.337   | 74.390   | 278.530 | 79.852  | 261.853 |
| AMK58_29035 | <a href="#">no KO assigned I (GenBank) hypothetical protein</a>                                                                                             | Hypothetical                        | 57.472   | 57.482   | 70.836   | 517.581 | 55.366  | 274.871 |
| AMK58_29040 | <a href="#">no KO assigned I (GenBank) hypothetical protein</a>                                                                                             | Hypothetical                        | 15.731   | 15.556   | 26.820   | 419.561 | 32.804  | 203.413 |
| AMK58_29045 | <a href="#">no KO assigned I (GenBank) hypothetical protein</a>                                                                                             | Hypothetical                        | 58.005   | 61.426   | 53.985   | 363.839 | 82.104  | 210.737 |
| AMK58_29050 | <a href="#">no KO assigned I (GenBank) hypothetical protein</a>                                                                                             | Hypothetical                        | 94.709   | 83.597   | 77.955   | 299.122 | 63.432  | 410.369 |
| AMK58_29055 | <a href="#">no KO assigned I (GenBank) hypothetical protein</a>                                                                                             | Hypothetical                        | 185.450  | 173.131  | 160.789  | 269.158 | 128.582 | 400.674 |
| AMK58_29060 | <a href="#">no KO assigned I (GenBank) hypothetical protein</a>                                                                                             | Hypothetical                        | 90.089   | 83.667   | 76.851   | 433.087 | 81.681  | 418.404 |
| AMK58_29065 | <a href="#">no KO assigned I (GenBank) hypothetical protein</a>                                                                                             | Hypothetical                        | 39.688   | 32.016   | 41.478   | 504.167 | 29.082  | 225.005 |
| AMK58_29070 | <a href="#">no KO assigned I (GenBank) hypothetical protein</a>                                                                                             | Hypothetical                        | 10.213   | 13.232   | 18.017   | 469.416 | 32.502  | 242.909 |
| AMK58_29075 | <a href="#">K00957 sulfate adenylyltransferase subunit 2 [EC:2.7.7.41] (GenBank) sulfate adenylyltransferase</a>                                            | Metabolism                          | 107.043  | 124.551  | 125.792  | 309.514 | 62.338  | 446.972 |
| AMK58_29080 | <a href="#">K00955 bifunctional enzyme CvsN/CvsC [EC:2.7.7.4.2.7.1.25] (GenBank) adenylyltransferase</a>                                                    | Metabolism                          | 49.067   | 48.923   | 57.652   | 268.046 | 45.364  | 370.255 |
| AMK58_29085 | <a href="#">K08678 UDP-glucuronate decarboxylase [EC:4.1.1.351] (GenBank) NAD-dependent dehydratase</a>                                                     | Metabolism: Carbohydrate            | 174.802  | 148.439  | 138.502  | 171.816 | 85.058  | 502.056 |
| AMK58_29090 | <a href="#">no KO assigned I (GenBank) pirin</a>                                                                                                            | No COG                              | 393.912  | 335.101  | 321.696  | 121.424 | 157.254 | 533.251 |
| AMK58_29095 | <a href="#">K03273 D-glycero-D-manno-heptose 1,7-bisphosphate phosphatase [EC:3.1.3.82.3.1.3.831] (GenBank) D-mannoheptose 1,7-bisphosphate phosphatase</a> | Biosynthesis: polysacchharide       | 85.845   | 82.593   | 65.510   | 89.307  | 93.486  | 463.552 |
| AMK58_29100 | <a href="#">no KO assigned I (GenBank) hypothetical protein</a>                                                                                             | Hypothetical                        | 11.924   | 7.916    | 17.442   | 398.775 | 74.576  | 342.196 |
| AMK58_29105 | <a href="#">no KO assigned I (GenBank) hypothetical protein</a>                                                                                             | Hypothetical                        | 22.072   | 19.863   | 29.504   | 311.753 | 374.438 | 297.331 |
| AMK58_29110 | <a href="#">no KO assigned I (GenBank) hypothetical protein</a>                                                                                             | Hypothetical                        | 14.214   | 10.868   | 27.955   | 286.687 | 51.974  | 363.484 |
| AMK58_29115 | <a href="#">no KO assigned I (GenBank) hypothetical protein</a>                                                                                             | Hypothetical                        | 12.492   | 11.482   | 22.384   | 149.958 | 15.121  | 670.499 |
| AMK58_29120 | <a href="#">no KO assigned I (GenBank) hypothetical protein</a>                                                                                             | Hypothetical                        | 21.994   | 21.024   | 55.677   | 215.659 | 40.420  | 356.438 |
| AMK58_29125 | <a href="#">K03496 chromosome partitioning protein I (GenBank) hypothetical protein</a>                                                                     | Cell Cycle/Shape/Homeostatis        | 108.028  | 104.169  | 121.495  | 153.039 | 54.958  | 368.127 |
| AMK58_29130 | <a href="#">K03497 chromosome partitioning protein_ParB family I (GenBank) hypothetical protein</a>                                                         | Cell Cycle/Shape/Homeostatis        | 76.020   | 90.310   | 111.630  | 459.428 | 48.169  | 502.288 |
| AMK58_29135 | <a href="#">K01840 phosphomannomutase [EC:5.4.2.81] (GenBank) phosphomannomutase</a>                                                                        | Metabolism: Carbohydrate            | 304.757  | 248.847  | 272.875  | 252.174 | 140.940 | 421.571 |
| AMK58_29140 | <a href="#">K00012 UDPglucose 6-dehydrogenase [EC:1.1.1.221] (GenBank) UDP-glucose 6-dehydrogenase</a>                                                      | Metabolism: Carbohydrate            | 195.582  | 132.561  | 160.611  | 325.595 | 140.609 | 451.280 |
